# Supplementary material for: Synthesis and Structural Characterization of Isostructural 4-(4-Aryl)-2-(5-(4-fluorophenyl)-3-(1-(4-fluorophenyl)-5-methyl-1H-1,2,3-triazol-4-yl)-4,5-dihydro-1H-pyrazol-1-yl)thiazoles
Source: MDPI journal article supplement (doi:10.3390/cryst11070795), 2021-07-08
Supplement: s1 [file s1]

Archive with 10 entries (10 files):
- 1H NMR Spectrum of 5.pdf
- 13C NMR Spectrum of 4.pdf
- 13C NMR Spectrum of 5.pdf
- Checkcif of 4.pdf
- Checkcif of 5.pdf
- CIF of 4 - bmk1918.cif
- CIf of 5 - bmk1777e.cif
- IR Spectrum of 4.pdf
- IR Spectrum of 5.pdf
- 1H NMR Spectrum of 4.pdf
