# Supplementary material for: Synthesis and Structural Characterization of Isostructural 4-(4-Aryl)-2-(5-(4-fluorophenyl)-3-(1-(4-fluorophenyl)-5-methyl-1H-1,2,3-triazol-4-yl)-4,5-dihydro-1H-pyrazol-1-yl)thiazoles
Source: MDPI journal article supplement (doi:10.3390/cryst11070795), 2021-07-08
Supplement: s1 [file s1 › CIF of 4 - bmk1918.cif]

 
data_bmk1918
 
_audit_creation_method            'SHELXL-2018/1'
_shelx_SHELXL_version_number      '2018/1'
_chemical_name_systematic         ?
_chemical_name_common             ?
_chemical_melting_point           ?
_chemical_formula_moiety          ?
_chemical_formula_sum
 'C27 H19 Cl F2 N6 S' 
_chemical_formula_weight          532.99

loop_
 _atom_type_symbol
 _atom_type_description
 _atom_type_scat_dispersion_real
 _atom_type_scat_dispersion_imag
 _atom_type_scat_source
 'C'  'C'   0.0033   0.0016
 'International Tables Vol C Tables 4.2.6.8 and 6.1.1.4'
 'H'  'H'   0.0000   0.0000
 'International Tables Vol C Tables 4.2.6.8 and 6.1.1.4'
 'N'  'N'   0.0061   0.0033
 'International Tables Vol C Tables 4.2.6.8 and 6.1.1.4'
 'F'  'F'   0.0171   0.0103
 'International Tables Vol C Tables 4.2.6.8 and 6.1.1.4'
 'S'  'S'   0.1246   0.1234
 'International Tables Vol C Tables 4.2.6.8 and 6.1.1.4'
 'Cl'  'Cl'   0.1484   0.1585
 'International Tables Vol C Tables 4.2.6.8 and 6.1.1.4'
 
_space_group_crystal_system       triclinic
_space_group_IT_number            2
_space_group_name_H-M_alt         'P -1'
_space_group_name_Hall            '-P 1'
 
_shelx_space_group_comment
;
The symmetry employed for this shelxl refinement is uniquely defined
by the following loop, which should always be used as a source of
symmetry information in preference to the above space-group names.
They are only intended as comments.
;
 
loop_
 _space_group_symop_operation_xyz
 'x, y, z'
 '-x, -y, -z'
 
_cell_length_a                    7.7344(6)
_cell_length_b                    18.2778(12)
_cell_length_c                    19.4909(12)
_cell_angle_alpha                 116.181(6)
_cell_angle_beta                  96.410(6)
_cell_angle_gamma                 92.091(6)
_cell_volume                      2445.9(3)
_cell_formula_units_Z             4
_cell_measurement_temperature     293(2)
_cell_measurement_reflns_used   3072
_cell_measurement_theta_min     3.5580
_cell_measurement_theta_max     21.8480
 
_exptl_crystal_description        needle
_exptl_crystal_colour             colourless
_exptl_crystal_density_meas       ?
_exptl_crystal_density_method     ?
_exptl_crystal_density_diffrn     1.447          
_exptl_crystal_F_000              1096
_exptl_transmission_factor_min    ?
_exptl_transmission_factor_max    ?
_exptl_crystal_size_max           0.270
_exptl_crystal_size_mid           0.065
_exptl_crystal_size_min           0.026
_exptl_absorpt_coefficient_mu     0.287
_shelx_estimated_absorpt_T_min    0.927
_shelx_estimated_absorpt_T_max    0.993
_exptl_absorpt_correction_T_min                     0.791
_exptl_absorpt_correction_T_max                     1.000
_exptl_absorpt_correction_type            gaussian
_exptl_absorpt_process_details
;
CrysAlisPro 1.171.39.46 (Rigaku Oxford Diffraction, 2018)
Numerical absorption correction based on gaussian integration over
			a multifaceted crystal model
Empirical absorption correction using spherical harmonics,
 implemented in SCALE3 ABSPACK scaling algorithm.
;
_diffrn_ambient_temperature       293(2)
_diffrn_radiation_wavelength      0.71073
_diffrn_radiation_type            MoK\a
_diffrn_source                    ?
_diffrn_measurement_device_type 'SuperNova, Dual, Cu at home/near, Atlas'
_diffrn_measurement_method '\w scans'
_diffrn_detector_area_resol_mean  ?
_diffrn_reflns_number             23275
_diffrn_reflns_av_unetI/netI      0.1145
_diffrn_reflns_av_R_equivalents   0.0496
_diffrn_reflns_limit_h_min        -10
_diffrn_reflns_limit_h_max        10
_diffrn_reflns_limit_k_min        -24
_diffrn_reflns_limit_k_max        24
_diffrn_reflns_limit_l_min        -25
_diffrn_reflns_limit_l_max        26
_diffrn_reflns_theta_min          1.176
_diffrn_reflns_theta_max          29.664
_diffrn_reflns_theta_full         25.242
_diffrn_measured_fraction_theta_max   0.834
_diffrn_measured_fraction_theta_full  1.000
_diffrn_reflns_Laue_measured_fraction_max    0.834
_diffrn_reflns_Laue_measured_fraction_full   1.000
_diffrn_reflns_point_group_measured_fraction_max   0.834
_diffrn_reflns_point_group_measured_fraction_full  1.000
_reflns_number_total              11546
_reflns_number_gt                 4785
_reflns_threshold_expression      'I > 2\s(I)'
_reflns_Friedel_coverage          0.000
_reflns_Friedel_fraction_max      .
_reflns_Friedel_fraction_full     .
 
_reflns_special_details
;
 Reflections were merged by SHELXL according to the crystal
 class for the calculation of statistics and refinement.
 
 _reflns_Friedel_fraction is defined as the number of unique
 Friedel pairs measured divided by the number that would be
 possible theoretically, ignoring centric projections and
 systematic absences.
;
 
_computing_data_collection     'CrysAlisPro 1.171.39.46 (Rigaku OD, 2018)'
_computing_cell_refinement     'CrysAlisPro 1.171.39.46 (Rigaku OD, 2018)'
_computing_data_reduction      'CrysAlisPro 1.171.39.46 (Rigaku OD, 2018)'
_computing_structure_solution   'SHELXS'
_computing_structure_refinement 'SHELXL-2018/1 (Sheldrick, 2018)'
_computing_molecular_graphics     ?
_computing_publication_material   ?
_refine_special_details           ?
_refine_ls_structure_factor_coef  Fsqd
_refine_ls_matrix_type            full
_refine_ls_weighting_scheme       calc
_refine_ls_weighting_details
'w=1/[\s^2^(Fo^2^)+(0.0498P)^2^+0.0440P] where P=(Fo^2^+2Fc^2^)/3'
_atom_sites_solution_primary      ?
_atom_sites_solution_secondary    ?
_atom_sites_solution_hydrogens    geom
_refine_ls_hydrogen_treatment     constr
_refine_ls_extinction_method      'SHELXL-2018/1 (Sheldrick 2018)'
_refine_ls_extinction_coef        0.0012(3)
_refine_ls_extinction_expression
 'Fc^*^=kFc[1+0.001xFc^2^\l^3^/sin(2\q)]^-1/4^'
_refine_ls_number_reflns          11546
_refine_ls_number_parameters      670
_refine_ls_number_restraints      0
_refine_ls_R_factor_all           0.1802
_refine_ls_R_factor_gt            0.0652
_refine_ls_wR_factor_ref          0.1666
_refine_ls_wR_factor_gt           0.1239
_refine_ls_goodness_of_fit_ref    1.014
_refine_ls_restrained_S_all       1.014
_refine_ls_shift/su_max           0.001
_refine_ls_shift/su_mean          0.000
 
loop_
 _atom_site_label
 _atom_site_type_symbol
 _atom_site_fract_x
 _atom_site_fract_y
 _atom_site_fract_z
 _atom_site_U_iso_or_equiv
 _atom_site_adp_type
 _atom_site_occupancy
 _atom_site_site_symmetry_order  
 _atom_site_calc_flag
 _atom_site_refinement_flags_posn
 _atom_site_refinement_flags_adp
 _atom_site_refinement_flags_occupancy
 _atom_site_disorder_assembly
 _atom_site_disorder_group
C1 C 1.0593(5) 0.2274(2) 0.77666(19) 0.0537(9) Uani 1 1 d . . . . .
C2 C 1.1294(5) 0.1951(2) 0.82532(19) 0.0611(10) Uani 1 1 d . . . . .
H2 H 1.132093 0.138717 0.805910 0.073 Uiso 1 1 calc R U . . .
C3 C 1.1948(5) 0.2450(2) 0.9015(2) 0.0669(11) Uani 1 1 d . . . . .
H3 H 1.241203 0.222473 0.933227 0.080 Uiso 1 1 calc R U . . .
C4 C 1.1909(5) 0.3280(2) 0.9302(2) 0.0673(11) Uani 1 1 d . . . . .
C5 C 1.1258(6) 0.3621(2) 0.8837(2) 0.0781(12) Uani 1 1 d . . . . .
H5 H 1.125670 0.418655 0.903425 0.094 Uiso 1 1 calc R U . . .
C6 C 1.0607(5) 0.3120(2) 0.8075(2) 0.0681(11) Uani 1 1 d . . . . .
H6 H 1.016863 0.335271 0.776069 0.082 Uiso 1 1 calc R U . . .
C7 C 0.9771(4) 0.1733(2) 0.69724(19) 0.0512(9) Uani 1 1 d . . . . .
C8 C 0.9088(5) 0.1964(2) 0.64328(19) 0.0641(11) Uani 1 1 d . . . . .
H8 H 0.912856 0.250348 0.650612 0.077 Uiso 1 1 calc R U . . .
C9 C 0.8767(5) 0.0522(2) 0.60340(19) 0.0509(9) Uani 1 1 d . . . . .
C10 C 0.8490(5) -0.0882(2) 0.59966(19) 0.0577(10) Uani 1 1 d . . . . .
H10 H 0.968710 -0.086848 0.623097 0.069 Uiso 1 1 calc R U . . .
C11 C 0.7967(5) -0.1692(2) 0.52685(18) 0.0620(10) Uani 1 1 d . . . . .
H11A H 0.898178 -0.198099 0.509476 0.074 Uiso 1 1 calc R U . . .
H11B H 0.714461 -0.204357 0.535792 0.074 Uiso 1 1 calc R U . . .
C12 C 0.7131(5) -0.1422(2) 0.46924(18) 0.0508(9) Uani 1 1 d . . . . .
C13 C 0.7249(5) -0.0678(2) 0.65900(18) 0.0532(9) Uani 1 1 d . . . . .
C14 C 0.7884(6) -0.0230(2) 0.7374(2) 0.0685(11) Uani 1 1 d . . . . .
H14 H 0.908153 -0.009970 0.753236 0.082 Uiso 1 1 calc R U . . .
C15 C 0.6743(8) 0.0024(2) 0.7919(2) 0.0816(14) Uani 1 1 d . . . . .
H15 H 0.716298 0.032886 0.844136 0.098 Uiso 1 1 calc R U . . .
C16 C 0.4998(8) -0.0182(3) 0.7674(3) 0.0790(13) Uani 1 1 d . . . . .
C17 C 0.4325(6) -0.0639(2) 0.6918(2) 0.0696(11) Uani 1 1 d . . . . .
H17 H 0.312990 -0.078608 0.676780 0.083 Uiso 1 1 calc R U . . .
C18 C 0.5473(6) -0.0879(2) 0.6380(2) 0.0607(10) Uani 1 1 d . . . . .
H18 H 0.503145 -0.118494 0.585996 0.073 Uiso 1 1 calc R U . . .
C19 C 0.6168(4) -0.1966(2) 0.39500(18) 0.0490(9) Uani 1 1 d . . . . .
C20 C 0.5663(4) -0.1826(2) 0.33202(18) 0.0463(8) Uani 1 1 d . . . . .
C21 C 0.5927(5) -0.1068(2) 0.32276(19) 0.0578(10) Uani 1 1 d . . . . .
H21A H 0.608754 -0.120968 0.270383 0.087 Uiso 1 1 calc R U . . .
H21B H 0.694396 -0.073668 0.357014 0.087 Uiso 1 1 calc R U . . .
H21C H 0.492182 -0.076637 0.334887 0.087 Uiso 1 1 calc R U . . .
C22 C 0.4116(4) -0.2806(2) 0.19892(19) 0.0525(9) Uani 1 1 d . . . . .
C23 C 0.4222(5) -0.3596(2) 0.1455(2) 0.0706(11) Uani 1 1 d . . . . .
H23 H 0.474727 -0.396231 0.160568 0.085 Uiso 1 1 calc R U . . .
C24 C 0.3538(6) -0.3845(3) 0.0690(2) 0.0840(13) Uani 1 1 d . . . . .
H24 H 0.357403 -0.438216 0.032012 0.101 Uiso 1 1 calc R U . . .
C25 C 0.2813(6) -0.3285(3) 0.0491(2) 0.0786(12) Uani 1 1 d . . . . .
C26 C 0.2691(5) -0.2506(3) 0.1007(2) 0.0703(11) Uani 1 1 d . . . . .
H26 H 0.218190 -0.214191 0.084881 0.084 Uiso 1 1 calc R U . . .
C27 C 0.3336(5) -0.2257(2) 0.17727(19) 0.0605(10) Uani 1 1 d . . . . .
H27 H 0.324661 -0.172533 0.214002 0.073 Uiso 1 1 calc R U . . .
C28 C 0.5980(4) 0.7173(2) 0.76383(18) 0.0509(9) Uani 1 1 d . . . . .
C29 C 0.5552(5) 0.6859(2) 0.8134(2) 0.0616(10) Uani 1 1 d . . . . .
H29 H 0.545409 0.629432 0.796002 0.074 Uiso 1 1 calc R U . . .
C30 C 0.5267(5) 0.7359(3) 0.8876(2) 0.0696(11) Uani 1 1 d . . . . .
H30 H 0.495325 0.713364 0.919422 0.083 Uiso 1 1 calc R U . . .
C31 C 0.5449(5) 0.8188(3) 0.91396(19) 0.0669(11) Uani 1 1 d . . . . .
C32 C 0.5833(5) 0.8524(2) 0.8663(2) 0.0742(12) Uani 1 1 d . . . . .
H32 H 0.591820 0.908920 0.884236 0.089 Uiso 1 1 calc R U . . .
C33 C 0.6094(5) 0.8020(2) 0.7917(2) 0.0669(11) Uani 1 1 d . . . . .
H33 H 0.634997 0.824976 0.759503 0.080 Uiso 1 1 calc R U . . .
C34 C 0.6363(4) 0.6642(2) 0.68618(18) 0.0501(9) Uani 1 1 d . . . . .
C35 C 0.6575(5) 0.6851(2) 0.62900(18) 0.0612(10) Uani 1 1 d . . . . .
H35 H 0.645446 0.737215 0.632888 0.073 Uiso 1 1 calc R U . . .
C36 C 0.6985(4) 0.5458(2) 0.59851(19) 0.0485(9) Uani 1 1 d . . . . .
C37 C 0.7397(5) 0.4101(2) 0.60181(18) 0.0568(9) Uani 1 1 d . . . . .
H37 H 0.632486 0.409872 0.624224 0.068 Uiso 1 1 calc R U . . .
C38 C 0.7433(5) 0.3284(2) 0.53028(18) 0.0625(10) Uani 1 1 d . . . . .
H38A H 0.831253 0.296366 0.540054 0.075 Uiso 1 1 calc R U . . .
H38B H 0.630360 0.296594 0.514040 0.075 Uiso 1 1 calc R U . . .
C39 C 0.7889(4) 0.3548(2) 0.47049(18) 0.0501(9) Uani 1 1 d . . . . .
C40 C 0.8971(5) 0.4347(2) 0.66318(18) 0.0510(9) Uani 1 1 d . . . . .
C41 C 1.0626(6) 0.4171(2) 0.6449(2) 0.0623(10) Uani 1 1 d . . . . .
H41 H 1.076944 0.387373 0.593358 0.075 Uiso 1 1 calc R U . . .
C42 C 1.2079(5) 0.4423(2) 0.7009(2) 0.0691(11) Uani 1 1 d . . . . .
H42 H 1.318610 0.429289 0.687732 0.083 Uiso 1 1 calc R U . . .
C43 C 1.1837(6) 0.4869(2) 0.7760(2) 0.0708(12) Uani 1 1 d . . . . .
C44 C 1.0233(6) 0.5061(2) 0.7978(2) 0.0693(11) Uani 1 1 d . . . . .
H44 H 1.010709 0.536399 0.849511 0.083 Uiso 1 1 calc R U . . .
C45 C 0.8795(5) 0.4789(2) 0.7404(2) 0.0618(10) Uani 1 1 d . . . . .
H45 H 0.768785 0.490554 0.754178 0.074 Uiso 1 1 calc R U . . .
C46 C 0.8366(4) 0.3000(2) 0.39701(18) 0.0480(8) Uani 1 1 d . . . . .
C47 C 0.8496(4) 0.31070(19) 0.33224(18) 0.0464(8) Uani 1 1 d . . . . .
C48 C 0.8224(5) 0.3834(2) 0.31884(19) 0.0597(10) Uani 1 1 d . . . . .
H48A H 0.779651 0.366034 0.265309 0.090 Uiso 1 1 calc R U . . .
H48B H 0.931233 0.416868 0.332525 0.090 Uiso 1 1 calc R U . . .
H48C H 0.738670 0.414539 0.350007 0.090 Uiso 1 1 calc R U . . .
C49 C 0.9193(4) 0.2085(2) 0.20084(19) 0.0521(9) Uani 1 1 d . . . . .
C50 C 0.8729(5) 0.1269(2) 0.1525(2) 0.0661(10) Uani 1 1 d . . . . .
H50 H 0.829041 0.092595 0.171541 0.079 Uiso 1 1 calc R U . . .
C51 C 0.8919(6) 0.0964(3) 0.0754(2) 0.0785(12) Uani 1 1 d . . . . .
H51 H 0.862160 0.041174 0.041958 0.094 Uiso 1 1 calc R U . . .
C52 C 0.9550(6) 0.1486(3) 0.0492(2) 0.0767(12) Uani 1 1 d . . . . .
C53 C 1.0020(5) 0.2293(3) 0.0960(2) 0.0724(12) Uani 1 1 d . . . . .
H53 H 1.044143 0.263359 0.076398 0.087 Uiso 1 1 calc R U . . .
C54 C 0.9859(5) 0.2599(2) 0.1737(2) 0.0598(10) Uani 1 1 d . . . . .
H54 H 1.019819 0.314770 0.207137 0.072 Uiso 1 1 calc R U . . .
N1 N 0.9583(4) 0.08934(17) 0.67318(16) 0.0539(7) Uani 1 1 d . . . . .
N2 N 0.8410(4) -0.03051(18) 0.56448(15) 0.0594(8) Uani 1 1 d . . . . .
N3 N 0.7422(4) -0.06451(18) 0.49179(15) 0.0546(8) Uani 1 1 d . . . . .
N4 N 0.5631(4) -0.27539(18) 0.37767(17) 0.0623(8) Uani 1 1 d . . . . .
N5 N 0.4800(4) -0.31184(17) 0.30679(17) 0.0649(9) Uani 1 1 d . . . . .
N6 N 0.4830(4) -0.25509(17) 0.27861(15) 0.0514(7) Uani 1 1 d . . . . .
N7 N 0.6588(4) 0.58305(16) 0.66767(15) 0.0514(7) Uani 1 1 d . . . . .
N8 N 0.7316(4) 0.46606(17) 0.56458(15) 0.0605(8) Uani 1 1 d . . . . .
N9 N 0.7772(4) 0.43172(17) 0.49080(15) 0.0541(8) Uani 1 1 d . . . . .
N10 N 0.8775(4) 0.22319(17) 0.38317(16) 0.0601(8) Uani 1 1 d . . . . .
N11 N 0.9145(4) 0.18555(17) 0.31318(16) 0.0614(8) Uani 1 1 d . . . . .
N12 N 0.8978(4) 0.23865(16) 0.28121(15) 0.0512(7) Uani 1 1 d . . . . .
F1 F 0.3886(4) 0.00849(16) 0.82092(14) 0.1186(10) Uani 1 1 d . . . . .
F2 F 0.2150(4) -0.35386(17) -0.02640(13) 0.1184(10) Uani 1 1 d . . . . .
F3 F 1.3263(3) 0.51232(15) 0.83122(14) 0.1043(9) Uani 1 1 d . . . . .
F4 F 0.9707(4) 0.11768(17) -0.02734(12) 0.1085(9) Uani 1 1 d . . . . .
S1 S 0.81403(14) 0.11370(6) 0.55990(5) 0.0632(3) Uani 1 1 d . . . . .
S2 S 0.70922(13) 0.60415(6) 0.54826(5) 0.0612(3) Uani 1 1 d . . . . .
Cl1 Cl 1.26726(18) 0.39179(7) 1.02744(6) 0.0987(4) Uani 1 1 d . . . . .
Cl2 Cl 0.52361(18) 0.88262(8) 1.00979(6) 0.1002(4) Uani 1 1 d . . . . .
 
loop_
 _atom_site_aniso_label
 _atom_site_aniso_U_11
 _atom_site_aniso_U_22
 _atom_site_aniso_U_33
 _atom_site_aniso_U_23
 _atom_site_aniso_U_13
 _atom_site_aniso_U_12
C1 0.050(2) 0.052(2) 0.064(2) 0.031(2) 0.0104(19) 0.0018(19)
C2 0.072(3) 0.054(2) 0.062(2) 0.028(2) 0.016(2) 0.012(2)
C3 0.077(3) 0.068(3) 0.065(2) 0.038(2) 0.007(2) 0.014(2)
C4 0.071(3) 0.063(3) 0.065(2) 0.029(2) 0.002(2) -0.006(2)
C5 0.098(4) 0.057(3) 0.081(3) 0.036(2) -0.002(3) -0.005(2)
C6 0.082(3) 0.054(2) 0.070(3) 0.033(2) -0.004(2) -0.007(2)
C7 0.051(2) 0.051(2) 0.061(2) 0.0309(19) 0.0167(18) 0.0048(18)
C8 0.081(3) 0.049(2) 0.072(2) 0.035(2) 0.012(2) 0.010(2)
C9 0.053(2) 0.049(2) 0.055(2) 0.026(2) 0.0138(19) 0.0057(19)
C10 0.071(3) 0.048(2) 0.059(2) 0.031(2) 0.001(2) 0.008(2)
C11 0.076(3) 0.056(2) 0.062(2) 0.033(2) 0.010(2) 0.020(2)
C12 0.058(2) 0.047(2) 0.054(2) 0.0260(19) 0.0167(18) 0.0136(19)
C13 0.071(3) 0.042(2) 0.049(2) 0.0244(18) -0.001(2) 0.004(2)
C14 0.087(3) 0.060(2) 0.062(2) 0.036(2) -0.007(2) -0.008(2)
C15 0.140(5) 0.054(3) 0.048(2) 0.022(2) 0.014(3) -0.008(3)
C16 0.120(4) 0.053(3) 0.070(3) 0.029(2) 0.040(3) 0.004(3)
C17 0.084(3) 0.053(2) 0.076(3) 0.031(2) 0.017(3) 0.006(2)
C18 0.079(3) 0.047(2) 0.054(2) 0.0222(19) 0.007(2) 0.003(2)
C19 0.054(2) 0.044(2) 0.054(2) 0.0246(18) 0.0139(18) 0.0120(18)
C20 0.047(2) 0.042(2) 0.055(2) 0.0240(18) 0.0150(17) 0.0108(18)
C21 0.063(3) 0.050(2) 0.062(2) 0.0284(19) 0.0054(19) 0.0034(19)
C22 0.047(2) 0.057(2) 0.053(2) 0.024(2) 0.0066(17) 0.0018(19)
C23 0.076(3) 0.054(3) 0.072(3) 0.020(2) 0.003(2) 0.006(2)
C24 0.095(4) 0.067(3) 0.064(3) 0.007(2) 0.004(2) 0.002(3)
C25 0.080(3) 0.087(3) 0.063(3) 0.031(3) -0.001(2) -0.002(3)
C26 0.074(3) 0.071(3) 0.065(3) 0.031(2) 0.001(2) 0.005(2)
C27 0.062(3) 0.059(2) 0.061(2) 0.028(2) 0.0057(19) 0.008(2)
C28 0.048(2) 0.051(2) 0.058(2) 0.0283(19) 0.0032(18) 0.0058(18)
C29 0.067(3) 0.059(2) 0.061(2) 0.029(2) 0.007(2) 0.008(2)
C30 0.070(3) 0.085(3) 0.064(3) 0.042(3) 0.012(2) 0.009(2)
C31 0.074(3) 0.073(3) 0.051(2) 0.025(2) 0.010(2) 0.025(2)
C32 0.094(3) 0.061(3) 0.068(3) 0.027(2) 0.014(2) 0.024(2)
C33 0.086(3) 0.060(3) 0.064(2) 0.034(2) 0.017(2) 0.019(2)
C34 0.049(2) 0.048(2) 0.054(2) 0.0248(18) 0.0011(17) 0.0038(18)
C35 0.072(3) 0.053(2) 0.065(2) 0.031(2) 0.009(2) 0.013(2)
C36 0.045(2) 0.046(2) 0.053(2) 0.0228(19) -0.0012(17) 0.0036(17)
C37 0.071(3) 0.045(2) 0.060(2) 0.0283(19) 0.013(2) 0.0061(19)
C38 0.081(3) 0.049(2) 0.059(2) 0.027(2) 0.006(2) -0.005(2)
C39 0.053(2) 0.045(2) 0.055(2) 0.0261(19) -0.0003(17) 0.0011(18)
C40 0.066(3) 0.041(2) 0.050(2) 0.0231(18) 0.0101(19) 0.0054(19)
C41 0.078(3) 0.050(2) 0.064(2) 0.028(2) 0.019(2) 0.017(2)
C42 0.064(3) 0.059(3) 0.090(3) 0.038(3) 0.012(3) 0.015(2)
C43 0.084(3) 0.052(2) 0.073(3) 0.030(2) -0.010(3) 0.006(2)
C44 0.096(4) 0.056(3) 0.054(2) 0.024(2) 0.006(2) 0.016(3)
C45 0.079(3) 0.053(2) 0.060(2) 0.028(2) 0.017(2) 0.014(2)
C46 0.051(2) 0.042(2) 0.051(2) 0.0223(18) 0.0008(17) 0.0032(17)
C47 0.043(2) 0.040(2) 0.0536(19) 0.0205(18) -0.0014(16) 0.0015(17)
C48 0.068(3) 0.052(2) 0.068(2) 0.036(2) 0.007(2) 0.009(2)
C49 0.048(2) 0.050(2) 0.057(2) 0.024(2) 0.0036(18) 0.0063(18)
C50 0.070(3) 0.059(3) 0.064(2) 0.024(2) 0.010(2) 0.001(2)
C51 0.093(3) 0.068(3) 0.063(3) 0.019(2) 0.014(2) 0.010(3)
C52 0.077(3) 0.098(4) 0.059(3) 0.036(3) 0.015(2) 0.016(3)
C53 0.068(3) 0.091(3) 0.073(3) 0.049(3) 0.015(2) 0.012(3)
C54 0.059(3) 0.061(2) 0.060(2) 0.028(2) 0.0054(19) 0.003(2)
N1 0.057(2) 0.0484(18) 0.0630(19) 0.0302(16) 0.0107(16) 0.0083(16)
N2 0.074(2) 0.0513(19) 0.0548(17) 0.0270(16) 0.0030(16) 0.0059(17)
N3 0.059(2) 0.055(2) 0.0535(17) 0.0280(16) 0.0072(15) 0.0079(16)
N4 0.083(2) 0.0496(19) 0.0610(19) 0.0303(17) 0.0098(17) 0.0096(17)
N5 0.084(2) 0.0483(18) 0.070(2) 0.0342(17) 0.0092(18) 0.0042(17)
N6 0.057(2) 0.0441(17) 0.0587(17) 0.0273(16) 0.0103(15) 0.0087(15)
N7 0.057(2) 0.0455(18) 0.0524(17) 0.0233(15) 0.0060(15) 0.0048(15)
N8 0.087(2) 0.0488(19) 0.0510(17) 0.0258(16) 0.0122(16) 0.0113(17)
N9 0.065(2) 0.0481(18) 0.0499(17) 0.0231(15) 0.0037(15) 0.0051(16)
N10 0.082(2) 0.0467(18) 0.0524(17) 0.0238(16) 0.0029(16) 0.0092(17)
N11 0.085(2) 0.0464(18) 0.0586(18) 0.0286(16) 0.0079(17) 0.0126(17)
N12 0.0549(19) 0.0462(17) 0.0552(17) 0.0261(16) 0.0030(14) 0.0065(15)
F1 0.171(3) 0.0893(19) 0.0931(17) 0.0289(16) 0.0674(19) 0.0021(19)
F2 0.137(3) 0.130(2) 0.0611(14) 0.0258(16) -0.0182(15) 0.002(2)
F3 0.105(2) 0.0888(18) 0.1033(18) 0.0392(16) -0.0301(16) 0.0055(16)
F4 0.134(2) 0.125(2) 0.0631(14) 0.0365(15) 0.0263(15) 0.0149(19)
S1 0.0780(7) 0.0596(6) 0.0621(6) 0.0357(5) 0.0109(5) 0.0119(6)
S2 0.0746(7) 0.0572(6) 0.0589(5) 0.0317(5) 0.0113(5) 0.0115(5)
Cl1 0.1295(11) 0.0817(8) 0.0722(7) 0.0286(6) -0.0048(7) -0.0070(8)
Cl2 0.1249(11) 0.1057(9) 0.0626(6) 0.0269(7) 0.0217(6) 0.0417(8)
 
_geom_special_details
;
 All esds (except the esd in the dihedral angle between two l.s. planes)
 are estimated using the full covariance matrix.  The cell esds are taken
 into account individually in the estimation of esds in distances, angles
 and torsion angles; correlations between esds in cell parameters are only
 used when they are defined by crystal symmetry.  An approximate (isotropic)
 treatment of cell esds is used for estimating esds involving l.s. planes.
;
 
loop_
 _geom_bond_atom_site_label_1
 _geom_bond_atom_site_label_2
 _geom_bond_distance
 _geom_bond_site_symmetry_2
 _geom_bond_publ_flag
C1 C6 1.390(5) . ?
C1 C2 1.394(4) . ?
C1 C7 1.470(5) . ?
C2 C3 1.378(5) . ?
C2 H2 0.9300 . ?
C3 C4 1.368(5) . ?
C3 H3 0.9300 . ?
C4 C5 1.374(5) . ?
C4 Cl1 1.746(4) . ?
C5 C6 1.377(5) . ?
C5 H5 0.9300 . ?
C6 H6 0.9300 . ?
C7 C8 1.359(4) . ?
C7 N1 1.389(4) . ?
C8 S1 1.717(4) . ?
C8 H8 0.9300 . ?
C9 N1 1.293(4) . ?
C9 N2 1.360(4) . ?
C9 S1 1.733(3) . ?
C10 N2 1.489(4) . ?
C10 C13 1.514(5) . ?
C10 C11 1.532(4) . ?
C10 H10 0.9800 . ?
C11 C12 1.508(4) . ?
C11 H11A 0.9700 . ?
C11 H11B 0.9700 . ?
C12 N3 1.290(4) . ?
C12 C19 1.440(4) . ?
C13 C18 1.376(5) . ?
C13 C14 1.395(4) . ?
C14 C15 1.389(6) . ?
C14 H14 0.9300 . ?
C15 C16 1.360(6) . ?
C15 H15 0.9300 . ?
C16 F1 1.359(5) . ?
C16 C17 1.361(5) . ?
C17 C18 1.382(5) . ?
C17 H17 0.9300 . ?
C18 H18 0.9300 . ?
C19 N4 1.363(4) . ?
C19 C20 1.378(4) . ?
C20 N6 1.351(4) . ?
C20 C21 1.485(4) . ?
C21 H21A 0.9600 . ?
C21 H21B 0.9600 . ?
C21 H21C 0.9600 . ?
C22 C23 1.370(5) . ?
C22 C27 1.381(4) . ?
C22 N6 1.444(4) . ?
C23 C24 1.386(5) . ?
C23 H23 0.9300 . ?
C24 C25 1.362(5) . ?
C24 H24 0.9300 . ?
C25 C26 1.348(5) . ?
C25 F2 1.362(4) . ?
C26 C27 1.380(4) . ?
C26 H26 0.9300 . ?
C27 H27 0.9300 . ?
C28 C29 1.386(4) . ?
C28 C33 1.391(5) . ?
C28 C34 1.465(4) . ?
C29 C30 1.377(5) . ?
C29 H29 0.9300 . ?
C30 C31 1.364(5) . ?
C30 H30 0.9300 . ?
C31 C32 1.371(5) . ?
C31 Cl2 1.743(4) . ?
C32 C33 1.378(5) . ?
C32 H32 0.9300 . ?
C33 H33 0.9300 . ?
C34 C35 1.352(4) . ?
C34 N7 1.385(4) . ?
C35 S2 1.719(3) . ?
C35 H35 0.9300 . ?
C36 N7 1.293(4) . ?
C36 N8 1.357(4) . ?
C36 S2 1.742(3) . ?
C37 N8 1.491(4) . ?
C37 C40 1.509(5) . ?
C37 C38 1.533(4) . ?
C37 H37 0.9800 . ?
C38 C39 1.513(4) . ?
C38 H38A 0.9700 . ?
C38 H38B 0.9700 . ?
C39 N9 1.291(4) . ?
C39 C46 1.439(4) . ?
C40 C41 1.378(5) . ?
C40 C45 1.385(4) . ?
C41 C42 1.382(5) . ?
C41 H41 0.9300 . ?
C42 C43 1.365(5) . ?
C42 H42 0.9300 . ?
C43 F3 1.359(4) . ?
C43 C44 1.364(6) . ?
C44 C45 1.388(5) . ?
C44 H44 0.9300 . ?
C45 H45 0.9300 . ?
C46 N10 1.364(4) . ?
C46 C47 1.374(4) . ?
C47 N12 1.351(4) . ?
C47 C48 1.481(4) . ?
C48 H48A 0.9600 . ?
C48 H48B 0.9600 . ?
C48 H48C 0.9600 . ?
C49 C50 1.372(5) . ?
C49 C54 1.377(5) . ?
C49 N12 1.445(4) . ?
C50 C51 1.381(5) . ?
C50 H50 0.9300 . ?
C51 C52 1.365(6) . ?
C51 H51 0.9300 . ?
C52 C53 1.356(6) . ?
C52 F4 1.363(4) . ?
C53 C54 1.385(5) . ?
C53 H53 0.9300 . ?
C54 H54 0.9300 . ?
N2 N3 1.387(3) . ?
N4 N5 1.313(4) . ?
N5 N6 1.372(3) . ?
N8 N9 1.385(4) . ?
N10 N11 1.300(4) . ?
N11 N12 1.368(3) . ?
 
loop_
 _geom_angle_atom_site_label_1
 _geom_angle_atom_site_label_2
 _geom_angle_atom_site_label_3
 _geom_angle
 _geom_angle_site_symmetry_1
 _geom_angle_site_symmetry_3
 _geom_angle_publ_flag
C6 C1 C2 117.5(3) . . ?
C6 C1 C7 121.5(3) . . ?
C2 C1 C7 120.9(3) . . ?
C3 C2 C1 121.4(3) . . ?
C3 C2 H2 119.3 . . ?
C1 C2 H2 119.3 . . ?
C4 C3 C2 119.4(3) . . ?
C4 C3 H3 120.3 . . ?
C2 C3 H3 120.3 . . ?
C3 C4 C5 120.9(3) . . ?
C3 C4 Cl1 120.0(3) . . ?
C5 C4 Cl1 119.2(3) . . ?
C4 C5 C6 119.5(4) . . ?
C4 C5 H5 120.3 . . ?
C6 C5 H5 120.3 . . ?
C5 C6 C1 121.3(3) . . ?
C5 C6 H6 119.3 . . ?
C1 C6 H6 119.3 . . ?
C8 C7 N1 114.2(3) . . ?
C8 C7 C1 126.9(3) . . ?
N1 C7 C1 118.8(3) . . ?
C7 C8 S1 111.6(3) . . ?
C7 C8 H8 124.2 . . ?
S1 C8 H8 124.2 . . ?
N1 C9 N2 123.1(3) . . ?
N1 C9 S1 116.5(3) . . ?
N2 C9 S1 120.4(3) . . ?
N2 C10 C13 110.7(3) . . ?
N2 C10 C11 99.6(2) . . ?
C13 C10 C11 114.5(3) . . ?
N2 C10 H10 110.6 . . ?
C13 C10 H10 110.6 . . ?
C11 C10 H10 110.6 . . ?
C12 C11 C10 102.9(3) . . ?
C12 C11 H11A 111.2 . . ?
C10 C11 H11A 111.2 . . ?
C12 C11 H11B 111.2 . . ?
C10 C11 H11B 111.2 . . ?
H11A C11 H11B 109.1 . . ?
N3 C12 C19 122.4(3) . . ?
N3 C12 C11 113.0(3) . . ?
C19 C12 C11 124.5(3) . . ?
C18 C13 C14 118.0(4) . . ?
C18 C13 C10 121.9(3) . . ?
C14 C13 C10 119.9(4) . . ?
C15 C14 C13 120.5(4) . . ?
C15 C14 H14 119.7 . . ?
C13 C14 H14 119.7 . . ?
C16 C15 C14 118.7(4) . . ?
C16 C15 H15 120.6 . . ?
C14 C15 H15 120.6 . . ?
F1 C16 C15 118.4(4) . . ?
F1 C16 C17 118.9(5) . . ?
C15 C16 C17 122.7(4) . . ?
C16 C17 C18 118.0(4) . . ?
C16 C17 H17 121.0 . . ?
C18 C17 H17 121.0 . . ?
C13 C18 C17 122.0(4) . . ?
C13 C18 H18 119.0 . . ?
C17 C18 H18 119.0 . . ?
N4 C19 C20 109.3(3) . . ?
N4 C19 C12 121.1(3) . . ?
C20 C19 C12 129.6(3) . . ?
N6 C20 C19 103.8(3) . . ?
N6 C20 C21 126.6(3) . . ?
C19 C20 C21 129.6(3) . . ?
C20 C21 H21A 109.5 . . ?
C20 C21 H21B 109.5 . . ?
H21A C21 H21B 109.5 . . ?
C20 C21 H21C 109.5 . . ?
H21A C21 H21C 109.5 . . ?
H21B C21 H21C 109.5 . . ?
C23 C22 C27 120.8(3) . . ?
C23 C22 N6 119.1(3) . . ?
C27 C22 N6 120.1(3) . . ?
C22 C23 C24 119.4(3) . . ?
C22 C23 H23 120.3 . . ?
C24 C23 H23 120.3 . . ?
C25 C24 C23 118.4(4) . . ?
C25 C24 H24 120.8 . . ?
C23 C24 H24 120.8 . . ?
C26 C25 C24 123.1(4) . . ?
C26 C25 F2 119.1(4) . . ?
C24 C25 F2 117.8(4) . . ?
C25 C26 C27 118.8(4) . . ?
C25 C26 H26 120.6 . . ?
C27 C26 H26 120.6 . . ?
C26 C27 C22 119.4(3) . . ?
C26 C27 H27 120.3 . . ?
C22 C27 H27 120.3 . . ?
C29 C28 C33 117.3(3) . . ?
C29 C28 C34 121.6(3) . . ?
C33 C28 C34 121.0(3) . . ?
C30 C29 C28 121.8(3) . . ?
C30 C29 H29 119.1 . . ?
C28 C29 H29 119.1 . . ?
C31 C30 C29 119.3(4) . . ?
C31 C30 H30 120.3 . . ?
C29 C30 H30 120.3 . . ?
C30 C31 C32 120.7(4) . . ?
C30 C31 Cl2 119.6(3) . . ?
C32 C31 Cl2 119.6(3) . . ?
C31 C32 C33 119.6(4) . . ?
C31 C32 H32 120.2 . . ?
C33 C32 H32 120.2 . . ?
C32 C33 C28 121.1(3) . . ?
C32 C33 H33 119.4 . . ?
C28 C33 H33 119.4 . . ?
C35 C34 N7 114.3(3) . . ?
C35 C34 C28 127.5(3) . . ?
N7 C34 C28 118.1(3) . . ?
C34 C35 S2 112.0(3) . . ?
C34 C35 H35 124.0 . . ?
S2 C35 H35 124.0 . . ?
N7 C36 N8 123.9(3) . . ?
N7 C36 S2 116.3(2) . . ?
N8 C36 S2 119.8(3) . . ?
N8 C37 C40 111.3(3) . . ?
N8 C37 C38 99.5(2) . . ?
C40 C37 C38 115.3(3) . . ?
N8 C37 H37 110.1 . . ?
C40 C37 H37 110.1 . . ?
C38 C37 H37 110.1 . . ?
C39 C38 C37 103.0(3) . . ?
C39 C38 H38A 111.2 . . ?
C37 C38 H38A 111.2 . . ?
C39 C38 H38B 111.2 . . ?
C37 C38 H38B 111.2 . . ?
H38A C38 H38B 109.1 . . ?
N9 C39 C46 122.5(3) . . ?
N9 C39 C38 113.5(3) . . ?
C46 C39 C38 124.0(3) . . ?
C41 C40 C45 117.8(3) . . ?
C41 C40 C37 121.9(3) . . ?
C45 C40 C37 120.3(3) . . ?
C40 C41 C42 122.0(3) . . ?
C40 C41 H41 119.0 . . ?
C42 C41 H41 119.0 . . ?
C43 C42 C41 117.8(4) . . ?
C43 C42 H42 121.1 . . ?
C41 C42 H42 121.1 . . ?
F3 C43 C44 118.9(4) . . ?
F3 C43 C42 118.1(4) . . ?
C44 C43 C42 123.0(4) . . ?
C43 C44 C45 117.9(4) . . ?
C43 C44 H44 121.1 . . ?
C45 C44 H44 121.1 . . ?
C40 C45 C44 121.5(4) . . ?
C40 C45 H45 119.2 . . ?
C44 C45 H45 119.2 . . ?
N10 C46 C47 109.0(3) . . ?
N10 C46 C39 120.5(3) . . ?
C47 C46 C39 130.5(3) . . ?
N12 C47 C46 104.2(3) . . ?
N12 C47 C48 126.1(3) . . ?
C46 C47 C48 129.7(3) . . ?
C47 C48 H48A 109.5 . . ?
C47 C48 H48B 109.5 . . ?
H48A C48 H48B 109.5 . . ?
C47 C48 H48C 109.5 . . ?
H48A C48 H48C 109.5 . . ?
H48B C48 H48C 109.5 . . ?
C50 C49 C54 120.9(3) . . ?
C50 C49 N12 118.1(3) . . ?
C54 C49 N12 120.9(3) . . ?
C49 C50 C51 119.4(4) . . ?
C49 C50 H50 120.3 . . ?
C51 C50 H50 120.3 . . ?
C52 C51 C50 118.8(4) . . ?
C52 C51 H51 120.6 . . ?
C50 C51 H51 120.6 . . ?
C53 C52 F4 119.3(4) . . ?
C53 C52 C51 122.6(4) . . ?
F4 C52 C51 118.2(4) . . ?
C52 C53 C54 118.8(4) . . ?
C52 C53 H53 120.6 . . ?
C54 C53 H53 120.6 . . ?
C49 C54 C53 119.4(4) . . ?
C49 C54 H54 120.3 . . ?
C53 C54 H54 120.3 . . ?
C9 N1 C7 110.0(3) . . ?
C9 N2 N3 119.0(3) . . ?
C9 N2 C10 125.7(3) . . ?
N3 N2 C10 112.6(3) . . ?
C12 N3 N2 108.0(3) . . ?
N5 N4 C19 109.0(3) . . ?
N4 N5 N6 106.5(3) . . ?
C20 N6 N5 111.3(2) . . ?
C20 N6 C22 130.0(3) . . ?
N5 N6 C22 118.5(3) . . ?
C36 N7 C34 110.2(3) . . ?
C36 N8 N9 120.0(3) . . ?
C36 N8 C37 126.1(3) . . ?
N9 N8 C37 113.7(3) . . ?
C39 N9 N8 107.3(3) . . ?
N11 N10 C46 109.0(3) . . ?
N10 N11 N12 107.2(3) . . ?
C47 N12 N11 110.6(3) . . ?
C47 N12 C49 131.5(3) . . ?
N11 N12 C49 117.7(3) . . ?
C8 S1 C9 87.68(16) . . ?
C35 S2 C36 87.24(16) . . ?
 
loop_
 _geom_hbond_atom_site_label_D 
 _geom_hbond_atom_site_label_H 
 _geom_hbond_atom_site_label_A 
 _geom_hbond_distance_DH 
 _geom_hbond_distance_HA 
 _geom_hbond_distance_DA 
 _geom_hbond_angle_DHA 
 _geom_hbond_site_symmetry_A 
 _geom_hbond_publ_flag
C17 H17 N10  0.93 2.67 3.364(5) 132.0 2_656 yes
C17 H17 N11  0.93 2.67 3.387(5) 134.7 2_656 yes
C21 H21B N3  0.96 2.54 3.103(4) 117.4 . yes
C48 H48C N9  0.96 2.60 3.132(4) 115.1 . yes
C50 H50 F1  0.93 2.52 3.389(5) 156.2 2_656 yes
 
_refine_diff_density_max    0.238
_refine_diff_density_min   -0.243
_refine_diff_density_rms    0.047

_shelx_res_file
;
TITL bmk1918 in P-1
    shelx.res
    created by SHELXL-2018/1 at 19:13:42 on 27-Apr-2021
CELL  0.71073   7.7344  18.2778  19.4909  116.181   96.410   92.091
ZERR     4.00   0.0006   0.0012   0.0012    0.006    0.006    0.006
LATT   1
SFAC  C    H    N    F    S    CL
UNIT  108 76 24 8 4 4
MERG   2
MPLA C1 C2 C3 C4 C5 C6 Cl1
MPLA C7 C8 C9 N1 S1
MPLA C10 C11 C12 N2 N3
MPLA C19 C20 C21 N4 N5 N6
MPLA C22 C23 C24 C25 C26 C27 F2
MPLA C13 C14 C15 C16 C17 C18 F1
MPLA C10 C11 C12 N2 N3
MPLA C28 C29 C30 C31 C32 C33 CL2
MPLA C34 C35 C36 N7 S2
MPLA C37 C38 C39 N8 N9
MPLA  C46 C47 C48 N10 N11 N12
MPLA c49 c50 c51 c52 c53 c54
mpla c40 c41 c42 c43 c44 c45
MPLA C37 C38 C39 N8 N9
EQIV $1 -x+1, -y, -z+1
HTAB C17 N10_$1
HTAB C17 N11_$1
HTAB C21 N3
HTAB  C48 N9
HTAB  C50 F1_$1
FMAP   2
PLAN   10
SIZE     0.026   0.065   0.270
ACTA
BOND   $H
L.S.   4
WGHT    0.049800    0.044000
EXTI    0.001217
FVAR       1.14307
C1    1    1.059303    0.227381    0.776661    11.00000    0.05039    0.05210 =
         0.06387    0.03054    0.01038    0.00176
C2    1    1.129415    0.195101    0.825319    11.00000    0.07221    0.05409 =
         0.06190    0.02847    0.01566    0.01180
AFIX  43
H2    2    1.132093    0.138717    0.805910    11.00000   -1.20000
AFIX   0
C3    1    1.194805    0.244986    0.901546    11.00000    0.07728    0.06753 =
         0.06527    0.03826    0.00742    0.01443
AFIX  43
H3    2    1.241203    0.222473    0.933227    11.00000   -1.20000
AFIX   0
C4    1    1.190877    0.327964    0.930234    11.00000    0.07122    0.06261 =
         0.06539    0.02884    0.00233   -0.00622
C5    1    1.125777    0.362124    0.883652    11.00000    0.09777    0.05672 =
         0.08054    0.03565   -0.00180   -0.00481
AFIX  43
H5    2    1.125670    0.418655    0.903425    11.00000   -1.20000
AFIX   0
C6    1    1.060727    0.312020    0.807502    11.00000    0.08152    0.05380 =
         0.07028    0.03340   -0.00359   -0.00679
AFIX  43
H6    2    1.016863    0.335271    0.776069    11.00000   -1.20000
AFIX   0
C7    1    0.977091    0.173322    0.697236    11.00000    0.05076    0.05054 =
         0.06112    0.03086    0.01669    0.00478
C8    1    0.908786    0.196437    0.643284    11.00000    0.08076    0.04902 =
         0.07159    0.03454    0.01215    0.01040
AFIX  43
H8    2    0.912856    0.250348    0.650612    11.00000   -1.20000
AFIX   0
C9    1    0.876728    0.052250    0.603395    11.00000    0.05336    0.04869 =
         0.05546    0.02611    0.01381    0.00574
C10   1    0.849035   -0.088153    0.599658    11.00000    0.07115    0.04795 =
         0.05915    0.03053    0.00060    0.00820
AFIX  13
H10   2    0.968710   -0.086848    0.623097    11.00000   -1.20000
AFIX   0
C11   1    0.796705   -0.169232    0.526849    11.00000    0.07607    0.05603 =
         0.06229    0.03296    0.00970    0.02032
AFIX  23
H11A  2    0.898178   -0.198099    0.509476    11.00000   -1.20000
H11B  2    0.714461   -0.204357    0.535792    11.00000   -1.20000
AFIX   0
C12   1    0.713072   -0.142194    0.469237    11.00000    0.05822    0.04651 =
         0.05435    0.02601    0.01665    0.01356
C13   1    0.724863   -0.067841    0.658998    11.00000    0.07145    0.04165 =
         0.04864    0.02436   -0.00081    0.00356
C14   1    0.788417   -0.022980    0.737371    11.00000    0.08657    0.05986 =
         0.06238    0.03555   -0.00684   -0.00845
AFIX  43
H14   2    0.908153   -0.009970    0.753236    11.00000   -1.20000
AFIX   0
C15   1    0.674276    0.002412    0.791902    11.00000    0.13953    0.05430 =
         0.04845    0.02204    0.01395   -0.00800
AFIX  43
H15   2    0.716298    0.032886    0.844136    11.00000   -1.20000
AFIX   0
C16   1    0.499799   -0.018153    0.767438    11.00000    0.12029    0.05330 =
         0.07046    0.02852    0.03986    0.00362
C17   1    0.432542   -0.063914    0.691801    11.00000    0.08413    0.05253 =
         0.07604    0.03126    0.01688    0.00566
AFIX  43
H17   2    0.312990   -0.078608    0.676780    11.00000   -1.20000
AFIX   0
C18   1    0.547291   -0.087887    0.637984    11.00000    0.07929    0.04731 =
         0.05398    0.02216    0.00685    0.00261
AFIX  43
H18   2    0.503145   -0.118494    0.585996    11.00000   -1.20000
AFIX   0
C19   1    0.616781   -0.196560    0.394996    11.00000    0.05402    0.04422 =
         0.05374    0.02458    0.01390    0.01203
C20   1    0.566296   -0.182617    0.332025    11.00000    0.04692    0.04220 =
         0.05475    0.02399    0.01502    0.01080
C21   1    0.592744   -0.106770    0.322758    11.00000    0.06322    0.05035 =
         0.06240    0.02842    0.00542    0.00342
AFIX 137
H21A  2    0.608754   -0.120968    0.270383    11.00000   -1.50000
H21B  2    0.694396   -0.073668    0.357014    11.00000   -1.50000
H21C  2    0.492182   -0.076637    0.334887    11.00000   -1.50000
AFIX   0
C22   1    0.411618   -0.280562    0.198921    11.00000    0.04700    0.05689 =
         0.05302    0.02437    0.00659    0.00179
C23   1    0.422172   -0.359623    0.145542    11.00000    0.07558    0.05415 =
         0.07158    0.02028    0.00347    0.00585
AFIX  43
H23   2    0.474727   -0.396231    0.160568    11.00000   -1.20000
AFIX   0
C24   1    0.353823   -0.384539    0.068960    11.00000    0.09466    0.06670 =
         0.06374    0.00707    0.00424    0.00246
AFIX  43
H24   2    0.357403   -0.438216    0.032012    11.00000   -1.20000
AFIX   0
C25   1    0.281302   -0.328543    0.049112    11.00000    0.07963    0.08730 =
         0.06252    0.03119   -0.00099   -0.00234
C26   1    0.269137   -0.250582    0.100662    11.00000    0.07364    0.07122 =
         0.06460    0.03125    0.00112    0.00453
AFIX  43
H26   2    0.218190   -0.214191    0.084881    11.00000   -1.20000
AFIX   0
C27   1    0.333633   -0.225743    0.177265    11.00000    0.06233    0.05859 =
         0.06091    0.02765    0.00566    0.00790
AFIX  43
H27   2    0.324661   -0.172533    0.214002    11.00000   -1.20000
AFIX   0
C28   1    0.597965    0.717347    0.763833    11.00000    0.04784    0.05068 =
         0.05767    0.02826    0.00325    0.00580
C29   1    0.555161    0.685870    0.813363    11.00000    0.06735    0.05877 =
         0.06111    0.02945    0.00703    0.00754
AFIX  43
H29   2    0.545409    0.629432    0.796002    11.00000   -1.20000
AFIX   0
C30   1    0.526676    0.735881    0.887585    11.00000    0.07006    0.08486 =
         0.06435    0.04215    0.01230    0.00946
AFIX  43
H30   2    0.495325    0.713364    0.919422    11.00000   -1.20000
AFIX   0
C31   1    0.544888    0.818763    0.913955    11.00000    0.07419    0.07341 =
         0.05116    0.02451    0.00984    0.02512
C32   1    0.583347    0.852405    0.866315    11.00000    0.09367    0.06092 =
         0.06812    0.02718    0.01393    0.02403
AFIX  43
H32   2    0.591820    0.908920    0.884236    11.00000   -1.20000
AFIX   0
C33   1    0.609370    0.801991    0.791729    11.00000    0.08585    0.06006 =
         0.06432    0.03422    0.01657    0.01869
AFIX  43
H33   2    0.634997    0.824976    0.759503    11.00000   -1.20000
AFIX   0
C34   1    0.636348    0.664170    0.686184    11.00000    0.04904    0.04787 =
         0.05404    0.02482    0.00114    0.00377
C35   1    0.657480    0.685135    0.628999    11.00000    0.07223    0.05254 =
         0.06502    0.03147    0.00927    0.01274
AFIX  43
H35   2    0.645446    0.737215    0.632888    11.00000   -1.20000
AFIX   0
C36   1    0.698452    0.545821    0.598508    11.00000    0.04528    0.04579 =
         0.05286    0.02275   -0.00118    0.00365
C37   1    0.739652    0.410142    0.601808    11.00000    0.07139    0.04537 =
         0.05968    0.02828    0.01273    0.00606
AFIX  13
H37   2    0.632486    0.409872    0.624224    11.00000   -1.20000
AFIX   0
C38   1    0.743332    0.328431    0.530279    11.00000    0.08052    0.04895 =
         0.05872    0.02659    0.00585   -0.00488
AFIX  23
H38A  2    0.831253    0.296366    0.540054    11.00000   -1.20000
H38B  2    0.630360    0.296594    0.514040    11.00000   -1.20000
AFIX   0
C39   1    0.788934    0.354816    0.470490    11.00000    0.05262    0.04507 =
         0.05452    0.02606   -0.00033    0.00112
C40   1    0.897114    0.434715    0.663178    11.00000    0.06625    0.04052 =
         0.04976    0.02305    0.01010    0.00541
C41   1    1.062618    0.417113    0.644917    11.00000    0.07802    0.05020 =
         0.06450    0.02818    0.01864    0.01657
AFIX  43
H41   2    1.076944    0.387373    0.593358    11.00000   -1.20000
AFIX   0
C42   1    1.207921    0.442291    0.700852    11.00000    0.06409    0.05946 =
         0.09010    0.03821    0.01240    0.01505
AFIX  43
H42   2    1.318610    0.429289    0.687732    11.00000   -1.20000
AFIX   0
C43   1    1.183711    0.486859    0.775976    11.00000    0.08440    0.05172 =
         0.07263    0.02953   -0.01037    0.00613
C44   1    1.023295    0.506058    0.797820    11.00000    0.09631    0.05595 =
         0.05427    0.02397    0.00613    0.01606
AFIX  43
H44   2    1.010709    0.536399    0.849511    11.00000   -1.20000
AFIX   0
C45   1    0.879516    0.478866    0.740442    11.00000    0.07898    0.05259 =
         0.05967    0.02815    0.01702    0.01397
AFIX  43
H45   2    0.768785    0.490554    0.754178    11.00000   -1.20000
AFIX   0
C46   1    0.836628    0.300016    0.397009    11.00000    0.05117    0.04178 =
         0.05110    0.02235    0.00079    0.00324
C47   1    0.849644    0.310702    0.332236    11.00000    0.04323    0.03952 =
         0.05361    0.02046   -0.00139    0.00147
C48   1    0.822403    0.383435    0.318841    11.00000    0.06845    0.05185 =
         0.06805    0.03570    0.00671    0.00908
AFIX 137
H48A  2    0.779651    0.366034    0.265309    11.00000   -1.50000
H48B  2    0.931233    0.416868    0.332525    11.00000   -1.50000
H48C  2    0.738670    0.414539    0.350007    11.00000   -1.50000
AFIX   0
C49   1    0.919326    0.208465    0.200835    11.00000    0.04825    0.05044 =
         0.05681    0.02407    0.00360    0.00629
C50   1    0.872910    0.126949    0.152517    11.00000    0.07029    0.05905 =
         0.06435    0.02370    0.01022    0.00098
AFIX  43
H50   2    0.829041    0.092595    0.171541    11.00000   -1.20000
AFIX   0
C51   1    0.891890    0.096367    0.075414    11.00000    0.09329    0.06796 =
         0.06320    0.01873    0.01364    0.01048
AFIX  43
H51   2    0.862160    0.041174    0.041958    11.00000   -1.20000
AFIX   0
C52   1    0.955047    0.148552    0.049150    11.00000    0.07688    0.09792 =
         0.05868    0.03629    0.01506    0.01592
C53   1    1.001971    0.229253    0.096029    11.00000    0.06832    0.09087 =
         0.07339    0.04935    0.01482    0.01245
AFIX  43
H53   2    1.044143    0.263359    0.076398    11.00000   -1.20000
AFIX   0
C54   1    0.985922    0.259921    0.173664    11.00000    0.05895    0.06079 =
         0.06012    0.02843    0.00541    0.00349
AFIX  43
H54   2    1.019819    0.314770    0.207137    11.00000   -1.20000
AFIX   0
N1    3    0.958298    0.089342    0.673176    11.00000    0.05711    0.04840 =
         0.06301    0.03023    0.01073    0.00826
N2    3    0.841009   -0.030509    0.564481    11.00000    0.07409    0.05128 =
         0.05479    0.02702    0.00296    0.00585
N3    3    0.742220   -0.064511    0.491793    11.00000    0.05936    0.05512 =
         0.05348    0.02805    0.00717    0.00787
N4    3    0.563070   -0.275389    0.377666    11.00000    0.08254    0.04958 =
         0.06100    0.03029    0.00980    0.00959
N5    3    0.479966   -0.311842    0.306792    11.00000    0.08403    0.04833 =
         0.07014    0.03423    0.00924    0.00423
N6    3    0.483023   -0.255090    0.278606    11.00000    0.05697    0.04408 =
         0.05873    0.02732    0.01026    0.00869
N7    3    0.658819    0.583048    0.667672    11.00000    0.05737    0.04555 =
         0.05243    0.02335    0.00602    0.00485
N8    3    0.731568    0.466065    0.564580    11.00000    0.08665    0.04879 =
         0.05099    0.02583    0.01216    0.01135
N9    3    0.777162    0.431718    0.490798    11.00000    0.06454    0.04807 =
         0.04992    0.02311    0.00370    0.00505
N10   3    0.877457    0.223190    0.383168    11.00000    0.08172    0.04668 =
         0.05239    0.02382    0.00291    0.00916
N11   3    0.914523    0.185548    0.313183    11.00000    0.08470    0.04640 =
         0.05859    0.02860    0.00789    0.01256
N12   3    0.897759    0.238653    0.281210    11.00000    0.05491    0.04618 =
         0.05517    0.02606    0.00297    0.00647
F1    4    0.388576    0.008491    0.820919    11.00000    0.17143    0.08926 =
         0.09315    0.02894    0.06742    0.00211
F2    4    0.215014   -0.353861   -0.026396    11.00000    0.13667    0.12953 =
         0.06112    0.02585   -0.01819    0.00186
F3    4    1.326298    0.512322    0.831217    11.00000    0.10479    0.08879 =
         0.10327    0.03918   -0.03009    0.00546
F4    4    0.970696    0.117683   -0.027344    11.00000    0.13424    0.12519 =
         0.06313    0.03655    0.02632    0.01488
S1    5    0.814033    0.113701    0.559898    11.00000    0.07797    0.05956 =
         0.06207    0.03571    0.01093    0.01192
S2    5    0.709219    0.604150    0.548262    11.00000    0.07458    0.05723 =
         0.05886    0.03170    0.01134    0.01153
CL1   6    1.267260    0.391790    1.027436    11.00000    0.12947    0.08166 =
         0.07219    0.02863   -0.00476   -0.00700
CL2   6    0.523609    0.882622    1.009785    11.00000    0.12494    0.10566 =
         0.06265    0.02689    0.02171    0.04169
HKLF    4


REM  bmk1918 in P-1
REM R1 =  0.0652 for    4785 Fo > 4sig(Fo)  and  0.1802 for all   11546 data
REM    670 parameters refined using      0 restraints

END

WGHT      0.0498      0.0440

REM Highest difference peak  0.238,  deepest hole -0.243,  1-sigma level  0.047
Q1    1   0.4975 -0.1147  0.4384  11.00000  0.05    0.24
Q2    1   0.8413 -0.1098  0.4524  11.00000  0.05    0.23
Q3    1   0.9626 -0.0388  0.7271  11.00000  0.05    0.20
Q4    1   0.8938  0.5901  0.5396  11.00000  0.05    0.20
Q5    1   0.3328  0.8947  1.0254  11.00000  0.05    0.20
Q6    1   1.0908  0.1278  0.0003  11.00000  0.05    0.19
Q7    1   0.5251  0.6164  0.5675  11.00000  0.05    0.19
Q8    1   0.8214  0.1103 -0.0241  11.00000  0.05    0.19
Q9    1   1.2154  0.1224 -0.0115  11.00000  0.05    0.19
Q10   1   0.4223  0.8239  1.0080  11.00000  0.05    0.19
;
_shelx_res_checksum   28321

_shelx_hkl_file
;
   0   0  -3 4394.50 117.708   3
   0   0   3 4375.30 89.4051   2
   0   0  -4 84.3381 19.3120   2
   0   0   4 104.244 27.1879   3
   0   0   4 60.9022 15.4873   2
   0   0  -4 66.5163 23.3740   3
   0   0   5 2499.23 88.8773   2
   0   0  -5 2676.61 86.9434   2
   0   0   5 2633.36 87.7989   4
   0   0   5 2819.93 121.563   3
   0   0   6 9237.21 240.237   3
   0   0  -6 9029.54 174.052   2
   0   0   6 8604.95 181.879   2
   0   0   6 8753.86 174.872   4
   0   0   7 342.429 39.6751   2
   0   0   7 372.740 39.8486   4
   0   0  -7 334.249 36.8006   2
   0   0   7 348.583 53.5868   3
   0   0  -8 4492.09 142.032   2
   0   0   8 4129.90 148.210   2
   0   0   8 4450.87 194.130   3
   0   0   8 4411.05 145.231   4
   0   0   9 1304.41 84.6007   4
   0   0   9 1451.30 93.6236   2
   0   0   9 1562.20 121.658   3
   0   0   9 1232.45 50.2642   5
   0   0   9 1206.94 81.2495   1
   0   0  -9 1380.97 84.3282   2
   0   0  10 583.525 37.5867   5
   0   0  10 648.603 64.5532   4
   0   0  10 694.967 63.5066   1
   0   0  10 623.936 67.1137   2
   0   0  10 765.322 91.4855   3
   0   0 -10 714.583 63.4041   2
   0   0  11 270.754 45.0148   4
   0   0  11 254.612 43.7123   1
   0   0  11 246.174 55.6747   3
   0   0 -11 268.405 42.6197   2
   0   0  11 297.459 50.4997   2
   0   0  11 225.871 23.8963   5
   0   0 -12 25.8200 14.2588   2
   0   0  12 18.8142 7.53543   5
   0   0  12 15.0226 26.9022   3
   0   0  12 32.3954 16.7324   4
   0   0  12 16.2200 12.9241   2
   0   0  12 3.15728 12.1745   1
   0   0  13 91.4352 32.9796   2
   0   0  13 99.8130 43.9353   3
   0   0  13 81.7961 27.7868   1
   0   0  13 82.2532 27.8486   4
   0   0  13 51.2617 14.2667   5
   0   0 -13 77.1743 29.4836   2
   0   0  14 563.926 73.6941   4
   0   0  14 631.060 85.5151   2
   0   0  14 605.966 71.1424   1
   0   0  14 654.388 102.141   3
   0   0  14 686.314 47.1950   5
   0   0  15 39.1800 25.2664   4
   0   0  15 34.3828 10.9492   5
   0   0  15 15.2663 23.6959   3
   0   0  15 84.2832 39.1037   1
   0   0  15 3.01670 16.3148   2
   0   0  16 61.8536 29.7967   4
   0   0  16 23.3480 20.6417   1
   0   0  16 32.5837 10.4929   5
   0   0  17 372.691 35.5302   5
   0   0  17 604.345 78.6479   1
   0   0  17 348.979 63.3232   4
   0   0  18 124.254 41.6406   1
   0   0  19 109.300 44.1780   1
   0   0  20 4.81958 20.1093   1
   0   0  21 51.1614 33.7584   1
   0   0  22 20.4661 43.6544   1
   0   0  23 49.5669 41.6112   1
   0  -1  23 29.7999 22.4471   1
   0  -1  22 63.8961 39.6186   1
   0  -1  21 27.4286 23.1106   1
   0  -1  20-27.0300 25.9372   1
   0  -1  19 66.1886 26.7631   1
   0  -1  18 36.5729 25.1830   4
   0  -1  18-20.1645 21.0266   1
   0  -1  18 0.27499 9.53432   5
   0  -1  17-32.2547 22.2032   4
   0  -1  17 21.5737 12.4389   5
   0  -1  17-4.24023 19.1071   1
   0  -1  17-41.1183 39.7059   3
   0  -1  16 263.864 70.1533   3
   0  -1  16 300.912 52.2796   1
   0  -1  16 294.457 61.8236   2
   0  -1  16 199.349 45.0148   4
   0  -1  16 258.313 33.5310   5
   0  -1  15 32.3029 24.6490   2
   0  -1  15 42.1349 20.0446   1
   0  -1  15 41.8423 15.0906   5
   0  -1  15 37.2423 21.2018   4
   0  -1  15-3.09882 21.4750   3
   0  -1  14 197.832 56.9932   3
   0  -1  14 286.017 33.2728   5
   0   1 -14 204.326 40.4435   2
   0  -1  14 294.167 50.3728   4
   0  -1  14 266.047 55.0455   2
   0  -1  14 312.634 50.7544   1
   0  -1  13 124.520 30.3857   4
   0  -1  13 116.570 20.3024   5
   0  -1  13 124.892 31.4726   1
   0  -1  13 119.289 32.0690   2
   0   1 -13 187.747 37.1373   2
   0  -1  13 110.657 44.4524   3
   0  -1  12 77.9211 36.5283   3
   0  -1  12 67.4397 16.2445   5
   0   1 -12 61.8076 21.7978   2
   0  -1  12 60.6443 28.9395   2
   0  -1  12 75.5920 22.6555   1
   0  -1  12 68.4797 26.8408   4
   0  -1  11 368.922 65.1612   3
   0   1 -11 327.012 42.2197   2
   0  -1  11 316.509 31.6365   5
   0  -1  11 257.454 45.2331   2
   0  -1  11 286.146 41.0164   1
   0  -1  11 323.153 45.8751   4
   0   1 -10 493.320 50.4313   2
   0  -1  10 448.459 50.0250   4
   0  -1  10 438.299 54.4701   2
   0  -1  10 403.457 46.2774   1
   0  -1  10 478.087 36.5520   5
   0  -1  10 454.609 66.6986   3
   0  -1   9 729.909 60.6434   4
   0   1  -9 841.443 62.8936   2
   0  -1   9 701.416 42.5076   5
   0  -1   9 734.618 66.7803   2
   0  -1   9 818.880 85.6156   3
   0  -1   8 64.8871 13.2829   5
   0  -1   8 80.0711 22.4187   2
   0   1  -8 37.0865 13.2358   2
   0  -1   8 90.5308 22.8658   4
   0  -1   8 41.5847 19.9648   3
   0  -1   7 134.803 24.1528   4
   0  -1   7 115.446 23.3723   2
   0   1  -7 90.1539 17.2247   2
   0  -1   7 142.900 35.6624   3
   0  -1   6 57.2605 23.7327   3
   0   1  -6 58.4244 15.8537   2
   0  -1   6 57.5575 14.3257   4
   0  -1   6 56.7034 14.8101   2
   0  -1   5 365.370 30.9985   4
   0   1  -5 410.089 32.0247   2
   0  -1   5 386.557 33.1465   2
   0   1  -4 4.89513 6.78488   4
   0  -1   4 2.02687 6.99086   2
   0   1  -4 3.78896 6.62093   2
   0  -1   4-0.87464 6.61365   4
   0   1   3 51.8611 13.3907   2
   0  -1  -3 50.9022 12.2967   2
   0  -1  -3 58.1339 19.2283   3
   0  -1  -4 12.9535 11.8907   2
   0  -1  -4 13.4564 10.5749   3
   0   1   4 15.7269 12.5658   2
   0   1   4 13.3178 13.0487   3
   0  -1  -5 71.7424 25.5077   3
   0   1   5 70.7663 25.5721   3
   0  -1  -5 131.222 21.1290   2
   0   1   5 101.759 20.7360   2
   0   1   6 32.3244 22.1013   1
   0   1   6-12.3117 17.3746   3
   0  -1  -6 4.48369 12.3182   3
   0  -1  -6 5.25298 10.6060   2
   0   1   6-0.36798 12.6485   2
   0   1   7 103.895 34.6829   3
   0   1   7 87.3817 21.1346   1
   0  -1  -7 82.8601 28.8577   3
   0   1   7 74.0013 17.9861   2
   0  -1  -7 77.5163 19.5971   2
   0  -1  -8 84.8528 26.7389   3
   0  -1  -8 43.5668 18.7987   2
   0   1   8 51.1296 15.6362   1
   0   1   8 59.9991 31.4460   3
   0   1   8 75.0654 25.6948   2
   0   1   9 32.1674 17.2574   4
   0   1   9 34.4483 8.72594   5
   0  -1  -9 36.7993 16.8041   2
   0   1   9 28.4339 15.7861   2
   0   1   9 33.4748 18.7023   1
   0   1   9 55.0415 26.6064   3
   0  -1 -10 98.3169 26.8366   2
   0   1  10 78.8189 23.7058   4
   0   1  10 99.5182 14.1710   5
   0   1  10 95.1969 33.6397   3
   0   1  10 90.3700 26.8439   1
   0   1  10 47.5152 20.6898   2
   0   1  11-4.13996 15.1803   4
   0  -1 -11-17.5323 17.5572   2
   0   1  11-10.7661 20.3487   3
   0   1  11 10.3050 13.8219   1
   0   1  11 9.34641 5.96119   5
   0   1  11 22.4877 19.1241   2
   0   1  12 469.188 60.7118   1
   0   1  12 584.284 69.4551   4
   0   1  12 560.585 34.3206   5
   0   1  12 581.961 72.9141   2
   0   1  13-1.35507 5.29509   5
   0   1  13-22.4643 25.0328   2
   0   1  13 8.93079 14.1398   4
   0   1  13 10.3381 14.3099   1
   0   1  14 179.907 42.1786   1
   0   1  14 139.313 34.7211   4
   0   1  14 172.794 46.0455   2
   0   1  14 143.617 18.6854   5
   0   1  15 42.0272 23.9820   4
   0   1  15 19.9243 18.9036   1
   0   1  15 2.05398 5.50664   5
   0   1  16 3.97377 15.9930   4
   0   1  16-24.3284 23.5907   1
   0   1  17 39.8733 21.1428   1
   0   1  17-1.06269 17.3683   4
   0   1  18 26.3600 23.9585   1
   0   1  19 79.9653 35.3797   1
   0   1  20-18.5868 20.6511   1
   0   1  21 97.5958 35.9429   1
   0   1  22-27.1023 27.7798   1
   0   1  23 17.4099 29.4787   1
   0  -2  23 25.2888 21.6664   1
   0  -2  22 6.00423 19.7672   1
   0  -2  21 89.4547 36.5069   1
   0  -2  20 4.34551 28.2905   3
   0  -2  20 43.6578 25.2245   1
   0  -2  19 292.228 78.9611   3
   0  -2  19 344.549 60.3884   1
   0  -2  19 339.643 45.2112   5
   0  -2  18 25.1573 34.2980   3
   0  -2  18 2.85207 17.0162   4
   0  -2  18-4.56876 8.64103   5
   0  -2  18-3.07274 20.3296   1
   0  -2  17 35.7013 25.8992   2
   0  -2  17 32.5146 17.8799   5
   0  -2  17 26.2497 19.6016   4
   0  -2  17 31.3089 20.7191   1
   0  -2  17 55.1037 38.1170   3
   0  -2  16 285.159 37.6193   5
   0  -2  16 230.503 46.8181   4
   0  -2  16 257.326 46.4524   1
   0  -2  16 368.550 68.1383   2
   0  -2  16 266.872 67.2907   3
   0  -2  15 83.0910 42.4455   3
   0  -2  15 73.8025 31.6138   4
   0  -2  15 75.2390 19.8027   5
   0   2 -15 40.5153 25.1439   2
   0  -2  15 71.7642 30.4374   2
   0  -2  15 61.9914 24.6994   1
   0  -2  14 287.022 63.8377   3
   0  -2  14 326.551 38.4129   5
   0  -2  14 321.478 48.2095   1
   0   2 -14 325.582 47.7508   2
   0  -2  14 385.135 56.4132   4
   0  -2  14 395.023 62.4377   2
   0  -2  13 2937.89 144.027   4
   0  -2  13 3474.80 209.217   3
   0   2 -13 3279.51 143.773   2
   0  -2  13 3164.14 166.719   2
   0  -2  13 3117.73 112.093   5
   0  -2  13 3481.54 145.897   1
   0   2 -12 210.603 34.6815   2
   0  -2  12 142.598 23.8592   5
   0  -2  12 176.254 30.9299   1
   0  -2  12 167.595 34.0952   4
   0  -2  12 148.586 45.1800   3
   0  -2  12 155.821 36.7983   2
   0  -2  11 3111.31 181.860   3
   0  -2  11 2986.87 144.509   2
   0   2 -11 3172.95 127.105   2
   0  -2  11 3077.58 132.791   4
   0  -2  11 3092.57 103.832   5
   0  -2  10 11792.1 247.851   4
   0  -2  10 12634.7 345.974   3
   0  -2  10 12248.7 198.624   5
   0  -2  10 12320.3 271.772   2
   0   2 -10 12190.7 234.961   2
   0  -2   9 806.100 83.9739   3
   0  -2   9 768.259 59.7720   4
   0   2  -9 855.839 58.7142   2
   0  -2   9 775.404 48.1213   5
   0  -2   9 817.034 65.8986   2
   0   2  -8 497.724 41.9792   2
   0  -2   8 433.192 44.5246   2
   0  -2   8 461.984 35.6126   5
   0  -2   8 480.662 43.9490   4
   0   2  -7 6733.76 145.768   4
   0  -2   7 6760.66 154.263   4
   0   2  -7 6641.93 141.224   2
   0  -2   7 6679.76 128.403   5
   0  -2   7 6727.41 158.277   2
   0  -2   6 136.229 21.5085   2
   0  -2   6 160.836 23.3943   4
   0   2  -6 127.053 18.9227   2
   0   2  -6 174.342 22.6630   4
   0  -2   5 130.123 18.9181   2
   0  -2   5 158.652 19.4771   4
   0   2  -5 177.994 20.9465   4
   0   2  -5 165.292 19.2509   2
   0  -2   4 8125.73 124.359   2
   0   2  -4 8481.54 117.001   2
   0   2  -4 8849.04 129.719   4
   0  -2   4 8668.70 127.398   4
   0   2   2 6496.91 123.309   1
   0  -2  -3 3.60647 9.78567   3
   0  -2  -3 31.7252 12.1235   2
   0   2   3 32.1662 14.5006   1
   0  -2  -4 1023.21 76.9974   3
   0  -2  -4 938.917 56.8990   2
   0   2   4 938.885 57.8229   1
   0   2   4 947.050 58.9564   2
   0   2   5 8271.61 184.414   1
   0   2   5 8121.01 185.628   2
   0  -2  -5 8401.21 238.276   3
   0  -2  -5 8232.97 181.633   2
   0  -2  -6 304.058 40.2387   2
   0  -2  -6 271.117 47.9636   3
   0   2   6 265.311 37.7852   2
   0   2   6 277.666 37.6203   1
   0  -2  -7 17193.0 295.608   2
   0   2   7 16837.6 310.564   2
   0  -2  -7 16802.9 395.234   3
   0   2   7 16993.1 293.482   1
   0  -2  -8 99.6892 36.1157   3
   0   2   8 68.2514 25.2046   1
   0   2   8 59.4510 24.0773   2
   0  -2  -8 102.668 28.6370   2
   0   2   9 2913.52 136.830   1
   0   2   9 2831.61 54.2857   5
   0  -2  -9 2951.48 185.375   3
   0   2   9 2791.96 144.220   2
   0   2  10 185.901 14.6802   5
   0   2  10 263.169 49.2912   2
   0   2  10 229.061 42.6651   1
   0  -2 -10 213.651 56.6765   3
   0   2  11 28.4099 6.31826   5
   0   2  11 13.7158 19.4075   4
   0   2  11 13.6281 12.9289   2
   0   2  11-19.6378 25.5898   1
   0   2  12 3485.15 186.961   2
   0   2  12 3543.54 170.231   1
   0   2  12 3313.95 172.792   4
   0   2  12 3228.99 60.7400   5
   0   2  13 443.733 66.1405   4
   0   2  13 445.032 63.2418   1
   0   2  13 399.262 66.7361   2
   0   2  14 1268.64 111.521   1
   0   2  14 1245.83 116.928   4
   0   2  15 30.4108 27.6891   4
   0   2  15 18.6757 20.7793   1
   0   2  16 327.649 62.7443   1
   0   2  16 287.334 63.4014   4
   0   2  17 66.9931 30.6840   1
   0   2  18 7.98987 24.1640   1
   0   2  19 46.8535 29.5974   1
   0   2  20 96.4284 40.4744   1
   0   2  21 52.3894 43.5655   1
   0   2  22 0.62119 24.6949   1
   0  -3  23 72.3862 33.9316   1
   0  -3  22-41.1064 30.7931   1
   0  -3  21 102.678 61.6721   3
   0  -3  21 67.8949 28.8920   1
   0  -3  20 0.12266 13.5493   1
   0  -3  20-5.24871 29.0040   3
   0  -3  19 315.737 81.9604   3
   0  -3  19 303.202 44.8942   5
   0  -3  19 294.855 51.6123   1
   0  -3  18 14.0300 15.8538   5
   0  -3  18-12.0204 41.9733   3
   0  -3  18-5.86325 14.2528   4
   0  -3  18 23.6577 19.6163   1
   0  -3  18 3.26620 24.9864   2
   0  -3  17 13.5850 18.2786   2
   0  -3  17 86.7074 32.5066   4
   0  -3  17 66.2757 25.2507   1
   0  -3  17 75.8417 21.1871   5
   0  -3  17 60.9979 36.1800   3
   0  -3  16 19.4760 20.1188   1
   0  -3  16 1.94627 20.8483   3
   0  -3  16 4.55670 15.4969   4
   0  -3  16-4.52252 16.2147   2
   0   3 -16 3.98245 15.4404   2
   0  -3  16 3.80546 13.2407   5
   0  -3  15 6.96427 10.2937   5
   0  -3  15-1.78300 15.6163   2
   0   3 -15-1.18779 15.8733   2
   0  -3  15 10.6310 14.7144   4
   0  -3  15 52.8070 36.8191   3
   0  -3  15 9.86029 14.0134   1
   0  -3  14 349.887 51.2560   4
   0  -3  14 348.082 68.8069   3
   0  -3  14 284.529 39.0706   5
   0   3 -14 336.216 48.4022   2
   0  -3  14 344.023 57.2473   2
   0  -3  14 307.462 43.3184   1
   0   3 -13 69.3178 22.4497   2
   0  -3  13 108.042 46.5151   3
   0  -3  13 91.4296 22.8922   5
   0  -3  13 92.4877 29.6005   2
   0  -3  13 57.7200 20.6429   4
   0  -3  13 79.3550 23.0996   1
   0  -3  12 344.503 45.4030   4
   0   3 -12 390.132 46.9236   2
   0  -3  12 425.747 72.0099   3
   0  -3  12 346.898 38.0207   5
   0  -3  12 311.210 48.9958   2
   0   3 -11 24.6521 13.1153   2
   0  -3  11 34.9906 31.0972   3
   0  -3  11 15.1597 11.1870   5
   0  -3  11 30.7880 14.4853   4
   0  -3  11 2.46607 11.7229   2
   0  -3  10 564.332 46.9583   5
   0  -3  10 458.266 47.0045   4
   0  -3  10 491.984 53.6849   2
   0   3 -10 539.062 48.5422   2
   0  -3   9 15.6873 13.5685   2
   0  -3   9 10.1841 14.1086   4
   0   3  -9-4.88998 10.1716   4
   0  -3   9 4.36744 8.16898   5
   0   3  -9 1.85734 9.10899   2
   0  -3   8 103.449 22.1177   2
   0   3  -8 133.861 21.3809   2
   0  -3   8 158.450 23.7216   5
   0  -3   8 140.123 22.7949   4
   0   3  -8 128.121 22.2999   4
   0   3  -7 8.23096 10.0735   4
   0  -3   7 6.37786 6.89641   4
   0   3  -7 3.75642 7.73499   2
   0  -3   7 8.38443 9.23346   2
   0  -3   7 24.0805 9.70563   5
   0   3  -6-5.54756 7.55863   2
   0  -3   6-8.14307 8.71039   2
   0  -3   6-3.28656 8.24710   4
   0   3  -6 8.48615 10.7111   4
   0  -3   6 11.2557 11.0435   5
   0  -3   5-11.9031 10.6591   2
   0   3  -5-6.82874 8.58026   4
   0  -3   5 7.36963 6.97825   5
   0   3  -5-3.84764 8.52462   2
   0  -3   5-4.43389 5.87773   4
   0  -3   4 183.968 14.5432   1
   0  -3   4 214.464 22.3352   5
   0  -3   4 192.918 21.1949   4
   0   3  -4 183.830 18.9859   2
   0   3  -4 212.565 21.9038   4
   0  -3   2 399.534 21.2020   1
   0   3  -1 264.502 21.6820   5
   0  -3   1 236.075 21.1217   5
   0  -3   0 15.8572 9.18310   1
   0   3   0 21.3596 7.25355   5
   0   3   0 21.7048 10.1054   1
   0  -3   0 19.2266 7.84278   5
   0   3   1 9.35205 4.54246   5
   0   3   1-2.68786 9.46533   1
   0  -3  -1 1.18454 5.34384   5
   0   3   2 35.0372 15.0238   1
   0   3   2 39.6590 7.94205   5
   0   3   3 8.76667 4.87774   5
   0   3   3 7.37907 11.4005   1
   0   3   4 25.6920 18.0192   1
   0  -3  -4 3.54587 14.9177   3
   0   3   5 38.9658 18.7093   1
   0  -3  -5 38.7809 21.9812   3
   0  -3  -6 117.706 34.5630   3
   0   3   6 164.145 33.7933   1
   0   3   7 1292.65 91.4319   2
   0  -3  -7 1365.32 118.294   3
   0   3   7 1464.02 92.9362   1
   0   3   8 5.75473 11.1559   2
   0  -3  -8 14.4229 13.5486   3
   0   3   8 1.15968 19.3159   1
   0   3   9 446.478 60.2726   2
   0  -3  -9 552.178 81.4120   3
   0   3   9 531.069 62.0021   1
   0   3  10-7.51507 18.2361   2
   0   3  10-19.8713 22.1451   1
   0  -3 -10-17.2272 24.9627   3
   0   3  11 59.8783 23.0498   1
   0  -3 -11 73.3539 38.5214   3
   0   3  11 77.4735 26.4040   2
   0   3  12 135.641 38.1711   1
   0  -3 -12 195.122 60.9076   3
   0   3  12 136.657 42.2920   2
   0   3  13 45.4655 26.5511   1
   0   3  13 5.04249 18.4176   4
   0   3  14 147.232 42.9879   4
   0   3  14 130.593 43.0891   1
   0   3  15-9.32289 18.0614   1
   0   3  15 5.24084 19.6940   4
   0   3  16-25.4091 34.0535   1
   0   3  16 21.3602 30.0365   4
   0   3  17 58.1511 30.4646   1
   0   3  18-27.0674 28.3464   1
   0   3  19 60.9953 36.4217   1
   0   3  20 0.19760 31.4590   1
   0   3  21 2.09300 26.8142   1
   0   3  22 18.1336 34.9742   1
   0  -4  23-9.05659 48.3193   3
   0  -4  22-58.2434 27.6204   1
   0  -4  22 76.6419 50.1365   3
   0  -4  21 40.8417 27.1373   1
   0  -4  21 19.9392 30.0547   3
   0  -4  20 33.3665 32.6239   3
   0  -4  20 25.6783 23.0822   1
   0  -4  20 15.0593 12.1346   5
   0  -4  19 148.095 37.6084   1
   0  -4  19 102.949 38.9530   2
   0  -4  19 129.862 30.5334   5
   0  -4  19 129.121 53.6326   3
   0  -4  18 539.151 59.3077   5
   0  -4  18 619.029 106.222   3
   0  -4  18 514.668 83.5559   2
   0  -4  18 583.879 71.7766   4
   0  -4  18 534.374 64.4686   1
   0  -4  17 36.6222 17.9330   1
   0  -4  17 14.8334 21.7651   2
   0  -4  17 74.7778 23.8739   4
   0  -4  17 26.4622 31.6282   3
   0   4 -17 22.9958 12.4394   2
   0  -4  17 57.4843 21.5914   5
   0   4 -16 358.920 50.3959   2
   0  -4  16 328.465 76.2851   3
   0  -4  16 397.816 53.5975   1
   0  -4  16 299.418 56.4895   2
   0  -4  16 327.121 51.0598   4
   0  -4  16 335.951 44.8911   5
   0  -4  15 67.6007 19.2119   5
   0  -4  15 141.618 38.4579   2
   0  -4  15 111.427 32.8220   1
   0  -4  15 110.938 44.2465   3
   0  -4  15 117.054 29.1975   4
   0   4 -15 137.083 32.4704   2
   0  -4  14 107.403 24.4271   5
   0  -4  14 117.415 25.0568   1
   0  -4  14 115.797 42.2674   3
   0  -4  14 141.350 38.9716   2
   0  -4  14 57.3118 21.0757   4
   0   4 -14 123.371 30.5270   2
   0  -4  13 303.328 39.7426   5
   0   4 -13 325.839 41.2344   2
   0  -4  13 350.960 45.7799   4
   0  -4  13 332.355 52.0948   2
   0  -4  13 371.730 68.9575   3
   0  -4  12 574.725 57.1171   4
   0  -4  12 631.460 67.6292   2
   0   4 -12 614.753 54.0949   2
   0  -4  12 692.964 57.2454   5
   0  -4  11 52.1658 21.5144   2
   0   4 -11 45.8936 14.9142   4
   0  -4  11 71.7654 22.4706   4
   0  -4  11 54.6431 18.4939   5
   0   4 -11 43.2634 16.2166   2
   0  -4  10 4352.95 153.750   2
   0   4 -10 4421.23 140.762   4
   0  -4  10 4451.78 137.339   5
   0   4 -10 4648.85 133.363   2
   0  -4  10 4503.71 142.763   4
   0  -4   9 3788.75 123.658   4
   0   4  -9 3858.09 126.510   4
   0   4  -9 3780.81 112.442   2
   0  -4   9 3662.62 129.418   2
   0  -4   9 3838.47 122.734   5
   0   4  -8 877.395 50.6837   2
   0  -4   8 849.035 55.2844   4
   0   4  -8 866.133 57.8584   4
   0  -4   8 753.568 53.9476   2
   0  -4   8 855.097 56.2465   5
   0   4  -7 15126.6 201.142   2
   0  -4   7 15636.1 231.286   5
   0  -4   7 14863.3 223.274   2
   0  -4   7 15126.9 219.777   4
   0   4  -7 15348.4 234.107   4
   0  -4   6 5849.01 130.159   2
   0  -4   6 5998.11 138.800   5
   0   4  -6 5988.98 122.268   2
   0   4  -6 6138.92 140.426   4
   0  -4   6 5922.83 129.738   4
   0   4  -5 392.696 34.4179   4
   0  -4   5 454.941 37.2106   5
   0  -4   5 393.762 24.7292   1
   0   4  -5 392.481 30.3884   2
   0   4  -4 162.092 22.6017   4
   0  -4   4 174.438 15.2361   1
   0   4  -4 165.560 16.6842   1
   0   4  -3 30958.5 220.426   1
   0  -4   3 30727.2 202.185   1
   0  -4   2 102130. 433.603   1
   0   4  -2 105043. 490.576   5
   0   4  -2 105704. 428.929   1
   0  -4   1 2109.54 68.7989   5
   0   4  -1 2163.68 67.8591   1
   0   4  -1 1952.29 65.1155   5
   0  -4   1 2135.33 67.1997   1
   0  -4   0 3836.02 90.4682   5
   0  -4   0 3821.86 100.163   1
   0   4   0 4051.14 103.405   1
   0   4   0 3855.21 86.2711   5
   0   4   1 1751.91 55.0915   5
   0  -4  -1 1771.29 59.5901   5
   0   4   1 1818.60 75.1112   1
   0   4   2 19758.3 175.649   5
   0   4   2 20952.4 274.181   1
   0   4   3 8223.09 182.942   1
   0   4   3 7657.59 102.482   5
   0   4   4 2472.71 54.2958   5
   0   4   4 2520.56 109.200   1
   0  -4  -5 4446.40 198.741   3
   0   4   5 4536.04 67.3680   5
   0   4   5 4580.12 156.701   1
   0   4   6 7730.50 214.588   1
   0  -4  -6 7723.89 276.519   3
   0  -4  -7 187.195 48.9873   3
   0   4   7 154.755 36.9901   1
   0  -4  -8 38.9694 26.6664   3
   0   4   8 96.5559 30.0530   2
   0   4   8 50.7360 21.2768   1
   0   4   9 1496.73 106.427   1
   0  -4  -9 1609.75 148.211   3
   0   4   9 1252.39 104.756   2
   0   4  10 968.501 97.1563   2
   0   4  10 786.398 82.7080   1
   0  -4 -10 944.786 119.222   3
   0   4  11 1190.94 114.120   2
   0   4  11 1202.67 105.281   1
   0  -4 -11 1232.11 140.799   3
   0   4  12 2.27577 16.4495   1
   0   4  13 272.102 55.7321   1
   0   4  14 3.08662 19.8256   1
   0   4  14 1.40127 21.6828   4
   0   4  15 29.0198 27.8933   1
   0   4  16 33.4395 19.9723   1
   0   4  17 127.915 48.2914   1
   0   4  18-43.4261 35.4753   1
   0   4  19-9.35294 25.7677   1
   0   4  20 13.0672 36.9139   1
   0   4  21 28.7264 34.4275   1
   0  -5  25 2.76894 41.9343   3
   0  -5  24-0.32531 41.9419   3
   0  -5  23-25.9083 37.4328   3
   0  -5  22 8.04420 17.9354   1
   0  -5  22 7.13570 23.8269   3
   0  -5  21 19.4768 40.2025   3
   0  -5  21-11.6029 13.0279   5
   0  -5  21 0.88665 15.7156   1
   0  -5  20 23.7415 16.3334   5
   0  -5  20-0.60782 13.4981   1
   0  -5  20-53.8700 49.3348   3
   0  -5  19-15.7163 19.0723   4
   0  -5  19 3.71637 14.3108   5
   0  -5  19 44.3869 30.7947   2
   0  -5  19 4.08140 11.7830   1
   0  -5  19 40.9870 38.3642   3
   0  -5  18 91.8572 26.2546   1
   0  -5  18 10.8339 22.2256   3
   0  -5  18 44.5520 20.9327   4
   0   5 -18 69.0573 24.1663   2
   0  -5  18 60.9699 23.3276   5
   0  -5  18 104.556 39.9638   2
   0  -5  17-5.83744 29.5723   3
   0  -5  17 10.0630 14.8704   2
   0   5 -17-3.88798 13.6564   2
   0  -5  17 2.11524 11.0247   1
   0  -5  17-10.6609 17.0266   5
   0  -5  17-9.29786 13.6234   4
   0  -5  16 540.671 58.6043   1
   0  -5  16 546.805 63.9926   4
   0   5 -16 583.327 60.7018   2
   0  -5  16 539.816 60.0510   5
   0  -5  16 587.814 97.8925   3
   0  -5  16 595.700 77.9824   2
   0  -5  15-18.7019 28.6427   3
   0   5 -15 11.3939 13.6785   2
   0  -5  15 11.9967 11.7493   1
   0  -5  15 15.1779 20.2583   2
   0  -5  15 19.1336 18.5073   4
   0  -5  15 4.51256 10.1028   5
   0  -5  14 263.344 40.3335   5
   0   5 -14 255.028 36.9330   2
   0  -5  14 259.156 40.9311   4
   0  -5  14 298.124 49.9006   2
   0  -5  13 99.8398 25.6415   5
   0  -5  13 69.6101 25.6191   2
   0  -5  13 47.6504 16.8381   4
   0   5 -13 90.8304 22.8535   4
   0   5 -13 65.8935 21.2883   2
   0  -5  12 241.042 35.3349   4
   0   5 -12 320.883 41.4319   4
   0  -5  12 311.081 46.1632   2
   0  -5  12 315.653 41.0366   5
   0   5 -12 285.377 34.9192   2
   0   5 -11 167.421 26.3741   2
   0   5 -11 170.855 30.4731   4
   0  -5  11 149.437 27.8283   5
   0  -5  11 139.014 29.3318   2
   0  -5  11 158.109 28.0852   4
   0   5 -10 26.0030 16.0400   4
   0  -5  10 40.3102 17.0558   5
   0  -5  10 5.53056 7.96138   4
   0  -5  10 39.7103 14.2397   2
   0   5 -10 37.9754 15.3074   2
   0  -5   9 5.15259 10.2136   2
   0   5  -9 29.3993 12.4917   2
   0  -5   9 15.7686 10.3101   4
   0  -5   9 20.0741 13.0976   5
   0   5  -9 27.4560 14.7500   4
   0  -5   8 5.32440 12.8712   5
   0  -5   8 22.3796 15.1821   2
   0   5  -8 7.44837 9.44823   2
   0   5  -8 9.34672 12.4474   4
   0  -5   8 27.7629 15.8666   4
   0  -5   7 975.392 46.8686   1
   0   5  -7 1063.38 55.5617   2
   0   5  -7 1063.49 65.3478   4
   0  -5   7 1015.63 63.9289   5
   0  -5   7 1097.74 60.4573   4
   0   5  -6 472.320 36.5101   2
   0  -5   6 455.506 29.6381   1
   0   5  -6 493.851 42.9771   4
   0  -5   6 511.064 43.6945   5
   0   5  -5 522.810 33.6482   1
   0   5  -5 459.207 40.9124   4
   0  -5   5 467.211 28.1333   1
   0   5  -4 113.421 16.0064   1
   0  -5   4 133.839 17.1560   1
   0   5  -3 76.9521 18.2553   5
   0  -5   3 32.9118 8.11183   1
   0   5  -3 17.3606 7.91969   1
   0   5  -2 30.6370 14.6429   1
   0   5  -2 99.1778 20.6471   5
   0  -5   2 33.1201 11.9149   5
   0  -5   2 43.7380 11.5677   1
   0   5  -1 76.6427 16.4032   1
   0  -5   1 81.4302 15.8120   1
   0  -5   1 84.4276 17.2459   5
   0   5  -1 50.4278 11.8899   5
   0   5   0 5.90244 12.5155   1
   0  -5   0 11.4440 10.2124   1
   0   5   0 19.1620 9.29693   5
   0  -5   0 4.90330 9.82488   5
   0   5   1-3.95327 13.3225   1
   0  -5  -1 14.3861 8.74673   5
   0   5   1 19.0559 11.4487   2
   0  -5  -1 20.7786 11.7398   1
   0   5   1 15.7379 9.02266   5
   0   5   2 89.1705 24.6493   1
   0   5   2 72.7710 12.2708   5
   0   5   3 733.778 60.1266   1
   0   5   3 578.136 33.4647   5
   0   5   4 121.654 28.5288   1
   0   5   4 110.688 13.8863   5
   0   5   5 467.020 54.5036   1
   0   5   5 444.523 24.3064   5
   0  -5  -6 28.4391 21.6684   3
   0   5   6 22.4302 17.1441   1
   0   5   6 14.0215 4.14562   5
   0   5   7 100.063 29.2677   1
   0  -5  -7 99.0528 35.3344   3
   0  -5  -8 82.2969 38.3998   3
   0   5   8 70.9291 26.1793   2
   0   5   8 81.6733 28.1472   1
   0   5   9-4.32709 15.2179   2
   0   5   9-12.0546 21.9534   1
   0  -5  -9 47.0814 34.9763   3
   0   5  10-20.8185 18.3252   1
   0  -5 -10 45.1930 29.7424   3
   0   5  10-15.2138 15.2289   2
   0   5  11 56.8079 26.7873   1
   0   5  12 145.303 42.0125   1
   0   5  13 12.2464 24.7828   1
   0   5  14 105.677 37.8376   1
   0   5  15-25.2027 31.7322   1
   0   5  16 115.547 45.8181   1
   0   5  17 15.6702 32.8869   1
   0   5  18 48.3176 33.4511   1
   0   5  19 26.3254 32.3060   1
   0   5  20 37.5934 37.5038   1
   0  -6  25 63.5265 65.0694   3
   0  -6  24-26.4804 37.9418   3
   0  -6  23 6.28571 36.5038   3
   0  -6  22-3.09207 14.3386   1
   0  -6  22 18.8082 27.6608   3
   0  -6  22-22.4824 20.9099   5
   0  -6  21 77.2123 32.7107   5
   0  -6  21 183.937 67.4153   3
   0  -6  21 117.755 35.1663   1
   0  -6  20 8.63736 24.8414   2
   0  -6  20 25.7458 19.1049   1
   0  -6  20 37.9687 22.0647   5
   0  -6  20 2.46206 25.5406   3
   0  -6  19 514.214 79.9157   2
   0  -6  19 586.871 64.9832   1
   0  -6  19 602.748 70.3930   4
   0  -6  19 609.454 71.0956   5
   0  -6  19 470.225 93.9643   3
   0   6 -19 556.799 63.6496   2
   0  -6  18 1657.78 101.561   1
   0  -6  18 1661.55 136.697   2
   0   6 -18 1468.08 100.199   2
   0  -6  18 1577.18 110.508   4
   0  -6  18 1706.96 115.551   5
   0  -6  18 1671.65 172.334   3
   0  -6  17 633.204 80.8807   2
   0  -6  17 649.343 105.768   3
   0  -6  17 677.647 69.4596   4
   0   6 -17 886.563 75.1030   2
   0  -6  17 702.370 63.8048   1
   0  -6  17 726.752 73.6108   5
   0  -6  16 1832.45 113.277   5
   0  -6  16 1705.00 162.390   3
   0  -6  16 1855.40 131.332   2
   0  -6  16 1635.99 106.100   4
   0  -6  16 1802.80 97.9593   1
   0   6 -16 1838.58 102.892   2
   0  -6  15 37.8240 13.9104   4
   0  -6  15 96.1847 23.9312   1
   0  -6  15 52.3317 21.7968   2
   0   6 -15 53.4746 17.5870   4
   0  -6  15 77.3464 26.1862   5
   0   6 -15 72.5718 22.1356   2
   0  -6  14 1196.45 96.5262   2
   0  -6  14 1317.45 92.3861   5
   0  -6  14 1106.90 82.0090   4
   0   6 -14 1342.47 80.4081   2
   0   6 -14 1226.59 85.9722   4
   0  -6  13 18.3050 18.2622   2
   0   6 -13 3.24073 9.17869   2
   0   6 -13-3.63479 13.2910   4
   0  -6  13 13.0305 14.4730   4
   0  -6  13 5.65853 9.47749   5
   0  -6  12 2322.17 120.402   2
   0   6 -12 2277.16 95.7220   2
   0   6 -12 2193.43 111.666   4
   0  -6  12 2355.05 114.905   5
   0  -6  12 2204.02 105.993   4
   0   6 -11 105.701 20.8169   2
   0  -6  11 123.660 29.1733   5
   0  -6  11 107.250 23.0839   4
   0  -6  11 96.0836 24.2686   2
   0   6 -11 120.455 29.3870   4
   0  -6  10 2352.25 101.708   4
   0   6 -10 2253.17 107.291   4
   0  -6  10 2319.16 107.135   2
   0  -6  10 2417.31 112.001   5
   0   6 -10 2234.06 87.3946   2
   0   6  -9 41.9865 16.4865   4
   0   6  -9 53.9786 17.6140   2
   0  -6   9 62.7849 17.8441   5
   0  -6   9 65.1171 12.7767   1
   0  -6   9 35.6561 16.5729   4
   0  -6   8 4330.86 142.414   5
   0   6  -8 4049.07 115.553   2
   0  -6   8 4073.04 97.8328   1
   0   6  -8 4122.68 138.987   4
   0   6  -7 9648.76 180.406   2
   0   6  -7 10327.4 212.110   4
   0  -6   7 9986.07 141.895   1
   0   6  -6 1592.86 82.4501   4
   0   6  -6 1945.73 69.8603   1
   0  -6   6 1658.90 56.3771   1
   0  -6   5 34515.4 249.225   1
   0   6  -5 35123.4 293.850   1
   0   6  -4 8567.45 148.117   1
   0  -6   4 8817.90 136.824   1
   0  -6   3 12634.9 214.348   5
   0   6  -3 12012.3 205.411   5
   0  -6   3 12466.9 177.975   1
   0   6  -3 11954.9 180.009   1
   0  -6   2 18758.3 232.654   1
   0  -6   2 19559.1 259.146   5
   0   6  -2 19380.5 241.734   1
   0   6  -2 18559.4 248.895   5
   0   6  -1 7454.95 162.408   1
   0   6  -1 7133.39 148.166   5
   0  -6   1 7352.76 157.979   1
   0  -6   1 7522.93 157.840   5
   0   6   0 1238.13 72.9325   1
   0   6   0 1135.68 56.9368   5
   0  -6   0 1148.82 68.9314   1
   0  -6   0 1164.47 62.4248   5
   0   6   1 251.608 26.4864   5
   0  -6  -1 230.435 27.3784   5
   0   6   1 239.356 35.4434   1
   0  -6  -1 238.370 34.4265   1
   0   6   1 202.303 30.4648   2
   0   6   2 372.655 44.6061   1
   0   6   2 295.803 27.0986   5
   0  -6  -2 302.672 30.8647   5
   0   6   3 3806.83 145.653   1
   0   6   3 3176.26 86.3489   5
   0   6   4 204.750 20.8942   5
   0   6   4 296.731 45.0561   1
   0   6   5 4509.34 87.4004   5
   0   6   5 4833.56 178.546   1
   0  -6  -6 843.444 101.976   3
   0   6   6 875.583 81.0200   1
   0   6   7 3883.80 182.589   2
   0   6   7 4203.31 182.227   1
   0  -6  -7 3809.40 225.066   3
   0   6   8 125.238 36.8770   2
   0  -6  -8 57.4916 25.4555   3
   0   6   8 123.346 34.5395   1
   0   6   9 320.608 57.7666   1
   0   6   9 281.332 54.4719   2
   0  -6  -9 263.363 63.7315   3
   0   6  10 896.086 97.4826   1
   0   6  11 712.906 92.6195   1
   0   6  12 1406.80 128.514   1
   0   6  13 147.279 47.8662   1
   0   6  14 365.490 70.0798   1
   0   6  15 59.7287 30.5581   1
   0   6  16 81.6187 43.5347   1
   0   6  17-4.04189 19.5898   1
   0   6  18 49.6373 25.1351   1
   0   6  19 72.5833 46.3900   1
   0  -7  25 12.0534 38.2305   3
   0  -7  24-0.94449 36.0055   3
   0  -7  23 9.18070 38.2383   3
   0  -7  22 5.66275 15.9548   5
   0  -7  22-25.8960 40.5367   3
   0  -7  21 138.273 38.4069   5
   0  -7  21 83.5790 29.2430   1
   0  -7  21 135.499 56.8457   3
   0  -7  20-11.0021 33.5005   3
   0  -7  20-7.54125 11.7292   1
   0  -7  20 8.46804 20.8396   5
   0  -7  19 50.1621 28.1678   2
   0  -7  19 47.0105 17.8986   1
   0  -7  19 35.0434 18.7773   4
   0  -7  19 95.1534 31.7115   5
   0  -7  19 109.609 53.0223   3
   0   7 -19 75.9142 25.1493   2
   0   7 -18 95.3700 26.3349   2
   0  -7  18 71.6152 21.4357   4
   0  -7  18 168.741 57.2912   3
   0  -7  18 91.2402 23.5603   1
   0  -7  18 84.0003 30.5947   2
   0  -7  18 148.755 36.8276   5
   0  -7  17 292.816 39.6021   1
   0  -7  17 250.725 49.7218   2
   0  -7  17 225.648 40.9191   4
   0  -7  17 257.834 47.0752   5
   0   7 -17 295.646 42.7476   2
   0  -7  16 184.149 37.2912   5
   0  -7  16 141.806 35.6456   2
   0  -7  16 185.561 34.3103   4
   0  -7  16 196.600 32.2042   1
   0   7 -16 207.461 36.7432   4
   0   7 -16 202.537 33.6746   2
   0  -7  15 118.744 30.6563   5
   0   7 -15 152.240 27.0243   2
   0   7 -15 116.190 28.6828   4
   0  -7  15 152.187 33.4364   4
   0  -7  15 110.626 32.5352   2
   0  -7  14 83.7345 26.0317   5
   0  -7  14 138.699 31.7944   4
   0  -7  14 192.857 41.8724   2
   0   7 -14 108.427 24.7738   2
   0   7 -14 164.831 35.8315   4
   0  -7  13 34.7428 16.3215   4
   0  -7  13 32.5445 19.0883   2
   0  -7  13 16.0559 14.2853   5
   0   7 -13 12.5466 8.74837   2
   0   7 -13 13.2476 11.2068   4
   0   7 -12 112.039 20.2563   2
   0  -7  12 107.529 26.8161   5
   0  -7  12 90.8424 21.6003   4
   0   7 -12 98.2069 24.3792   4
   0  -7  12 87.7019 25.8774   2
   0   7 -11-6.11621 15.4687   4
   0  -7  11 0.07242 13.2691   5
   0  -7  11 14.9261 11.3220   1
   0   7 -11 13.5713 9.58714   2
   0  -7  10 29.5346 17.9328   5
   0   7 -10 25.4767 11.0297   2
   0   7 -10 28.0425 21.6954   4
   0  -7  10 37.7651 11.7136   1
   0  -7   9 21.2052 9.68970   1
   0   7  -9-7.89097 14.7625   4
   0  -7   9 12.7864 13.2842   5
   0   7  -9 13.6323 8.94845   2
   0  -7   8 43.3639 10.1313   1
   0   7  -8 54.0686 17.1474   2
   0   7  -8 68.2448 24.5542   4
   0   7  -7 534.757 55.8855   4
   0  -7   7 426.211 31.9653   1
   0  -7   6 75.5158 14.6868   1
   0   7  -6 79.5096 16.6380   1
   0   7  -5 119.949 20.2664   1
   0  -7   5 134.477 18.2516   1
   0  -7   4 135.907 29.1226   5
   0   7  -4 174.341 25.1453   1
   0  -7   4 173.492 22.4650   1
   0  -7   3-0.22587 8.13117   1
   0   7  -3-0.96943 11.8626   1
   0  -7   3 7.32876 11.0395   5
   0  -7   2 181.726 28.9913   5
   0   7  -2 137.241 23.8209   5
   0   7  -2 172.308 28.4986   1
   0  -7   2 182.306 26.2944   1
   0  -7   1 37.4377 13.8536   5
   0   7  -1 69.8369 19.0155   1
   0   7  -1 61.2805 16.1323   5
   0  -7   1 56.8445 18.8247   1
   0   7   0 103.173 20.1341   5
   0  -7   0 206.706 32.5609   5
   0   7   0 227.002 38.4184   1
   0  -7   0 135.063 29.4822   1
   0  -7  -1 482.606 43.1836   5
   0   7   1 459.589 38.2262   5
   0   7   1 500.592 54.1592   1
   0   7   2 191.959 24.1617   5
   0   7   2 162.124 34.5510   1
   0   7   3 12.1313 7.36185   5
   0   7   3 8.64485 15.7464   1
   0   7   4 261.178 43.7883   1
   0   7   5 95.7055 34.2702   1
   0  -7  -6 13.8446 23.8049   3
   0   7   6-19.9647 17.7463   1
   0   7   7 659.393 78.5754   1
   0  -7  -7 638.819 96.0589   3
   0   7   7 539.298 71.3594   2
   0  -7  -8 60.8660 37.2807   3
   0   7   8 96.3774 36.8914   1
   0   7   8 52.2718 25.4463   2
   0   7   9 257.548 51.9274   1
   0   7  10 136.879 45.3605   1
   0   7  11 34.4164 24.7830   1
   0   7  12-13.8142 32.1657   1
   0   7  13 4.47473 29.1080   1
   0   7  14 10.3764 26.1612   1
   0   7  15 37.9925 29.3187   1
   0   7  16 46.2692 44.7659   1
   0   7  17 0.43150 27.5165   1
   0   7  18 37.5026 37.2484   1
   0  -8  26 7.04687 41.5484   3
   0  -8  25 65.7904 62.8099   3
   0  -8  24 3.76010 40.4980   3
   0  -8  23 12.6942 29.1404   3
   0  -8  23-6.48885 23.0618   5
   0  -8  22 63.9971 24.5600   5
   0  -8  22 25.2718 31.2199   3
   0  -8  21 48.8356 23.0085   5
   0  -8  21 45.6489 47.2827   3
   0  -8  21-2.74876 9.32869   1
   0  -8  20 233.122 36.0127   1
   0  -8  20 247.843 74.3977   3
   0   8 -20 227.505 39.1596   2
   0  -8  20 218.695 47.5678   5
   0   8 -19 406.517 50.5501   2
   0  -8  19 382.077 60.5330   5
   0  -8  19 300.820 56.9310   2
   0  -8  19 387.896 45.6005   1
   0  -8  19 358.731 51.0434   4
   0  -8  19 507.847 99.8927   3
   0  -8  18 171.365 41.7456   2
   0  -8  18 87.7137 23.8137   4
   0  -8  18 112.973 33.9584   5
   0  -8  18 107.032 24.2850   1
   0   8 -18 150.913 30.7017   2
   0   8 -17 334.260 49.6355   4
   0  -8  17 326.638 39.1026   1
   0  -8  17 290.554 52.9677   2
   0  -8  17 285.900 44.4306   4
   0   8 -17 265.868 38.3719   2
   0  -8  17 295.427 51.4330   5
   0  -8  16 52.9215 20.1112   4
   0   8 -16 52.1472 24.3880   4
   0  -8  16 60.0646 24.3013   5
   0  -8  16 52.4369 27.0632   2
   0   8 -16 48.0731 18.6071   2
   0   8 -15 1387.44 80.6906   2
   0  -8  15 1501.53 108.555   5
   0   8 -15 1482.09 103.022   4
   0  -8  15 1387.39 91.2633   4
   0  -8  15 1552.21 108.102   2
   0   8 -14 424.306 56.8589   4
   0  -8  14 414.870 56.4751   5
   0   8 -14 411.882 41.9589   2
   0  -8  13 34.7981 17.3044   1
   0   8 -13 30.9809 14.4297   2
   0   8 -13 15.9148 14.2488   4
   0  -8  13 22.1167 14.7209   5
   0   8 -12 12.2957 13.0736   4
   0  -8  12 3.64279 13.9497   5
   0   8 -12 20.5082 11.0969   2
   0  -8  12 10.9237 11.7376   1
   0  -8  11-7.61910 8.36467   1
   0   8 -11 13.3489 12.2178   4
   0   8 -11-9.43867 12.3368   2
   0  -8  11 21.3287 14.6992   5
   0  -8  10 959.768 48.8359   1
   0   8 -10 857.883 73.0426   4
   0  -8  10 976.614 78.6843   5
   0   8 -10 876.149 59.9016   2
   0   8  -9 5620.14 183.067   4
   0  -8   9 5521.08 109.098   1
   0   8  -9 5210.58 148.289   2
   0   8  -8 268.351 39.7111   2
   0  -8   8 117.122 17.3605   1
   0   8  -8 201.493 40.2262   4
   0  -8   7 17995.1 206.500   1
   0   8  -7 18759.9 243.346   1
   0   8  -7 18736.5 314.076   4
   0   8  -6 12309.0 205.924   1
   0  -8   6 12683.6 180.431   1
   0  -8   5 17121.4 224.659   1
   0   8  -5 16601.1 244.543   1
   0  -8   4 3010.99 100.284   1
   0   8  -4 2838.19 105.141   1
   0  -8   4 2843.18 122.052   5
   0  -8   3 2899.93 105.099   1
   0   8  -3 2778.17 106.536   1
   0  -8   3 2867.98 119.540   5
   0   8  -2 2880.98 113.611   1
   0  -8   2 2920.20 111.763   1
   0  -8   2 2784.95 115.337   5
   0   8  -1 16081.8 254.047   5
   0  -8   1 15895.7 270.436   5
   0  -8   1 15803.7 278.770   1
   0   8  -1 16596.1 285.575   1
   0   8   0 513.656 53.5384   1
   0  -8   0 539.648 50.5271   5
   0  -8   0 486.717 51.2386   1
   0   8   0 433.103 48.8827   2
   0   8   0 476.711 44.2986   5
   0   8   1 6196.02 192.713   1
   0   8   1 5546.04 142.402   5
   0  -8  -1 6011.40 164.374   5
   0   8   2 206.277 38.6314   1
   0   8   2 255.640 29.7971   5
   0   8   3 2782.57 143.522   1
   0   8   4 1891.64 120.613   1
   0   8   5 221.734 41.9655   1
   0   8   6 69.3838 30.7539   1
   0   8   6 74.3190 26.8125   2
   0   8   7 404.245 64.7465   1
   0   8   8 198.144 51.0487   1
   0   8   9 5.44429 17.0899   1
   0   8  10 1629.49 141.228   1
   0   8  11 1359.54 135.861   1
   0   8  12 275.531 65.6714   1
   0   8  13 51.0793 31.0892   1
   0   8  14-2.70151 30.5491   1
   0   8  15-18.8065 42.6830   1
   0   8  16 3.68670 31.9041   1
   0   8  17 30.3391 26.1901   1
   0  -9  26 28.7999 53.8165   3
   0  -9  25 289.034 95.8237   3
   0  -9  24-36.4049 39.9695   3
   0  -9  23-3.13783 15.1507   5
   0  -9  23 81.0684 52.4617   3
   0  -9  22-20.6305 34.5835   3
   0  -9  22-16.2972 18.1578   5
   0  -9  21 78.5040 38.3003   5
   0  -9  21 45.9408 43.2532   3
   0   9 -20 25.1737 15.8125   2
   0  -9  20 9.64797 11.4134   1
   0  -9  20-1.53275 12.5590   5
   0   9 -19 15.8990 13.0497   2
   0  -9  19 75.0639 32.4021   2
   0  -9  19 0.36460 15.1259   5
   0  -9  19 28.2406 15.0584   1
   0  -9  18 96.4559 20.8568   1
   0   9 -18 100.809 24.8863   2
   0  -9  18 126.443 38.5304   5
   0  -9  17 19.7228 15.8958   1
   0  -9  17-2.87590 13.2916   5
   0  -9  17 0.81099 10.9350   1
   0   9 -17 2.64738 10.0511   2
   0   9 -16 24.1347 12.3653   2
   0  -9  16 20.0820 13.3775   1
   0   9 -16 1.51467 10.2846   4
   0  -9  16 42.6065 27.7822   5
   0   9 -15 52.1931 24.3675   4
   0   9 -15 31.1788 17.7732   2
   0  -9  15 20.3492 9.93108   1
   0  -9  15 43.8595 22.3892   5
   0  -9  14 113.253 23.9072   1
   0   9 -14 91.8177 26.1409   4
   0  -9  14 157.050 39.5010   5
   0   9 -14 120.131 23.1166   2
   0  -9  13-20.2941 18.0114   5
   0  -9  13 1.68447 7.06568   1
   0   9 -13-10.6276 12.9390   4
   0   9 -13 11.2408 11.8972   2
   0   9 -12-2.73476 8.72251   2
   0  -9  12 6.28622 12.4889   5
   0   9 -12-0.89149 10.6076   4
   0  -9  12 8.36690 7.45752   1
   0   9 -11-1.01799 10.1958   2
   0  -9  11 2.99344 5.44350   1
   0  -9  11-21.4656 25.6297   5
   0   9 -11-2.66424 16.8850   4
   0  -9  10 43.7950 10.4085   1
   0   9 -10 77.3770 24.6085   4
   0   9 -10 42.9144 16.8147   2
   0   9  -9 198.955 35.2448   4
   0   9  -9 205.747 35.0944   2
   0  -9   9 163.542 19.5517   1
   0   9  -8 401.417 50.7003   4
   0  -9   8 419.737 32.2753   1
   0   9  -8 402.099 39.9096   1
   0   9  -7 847.165 58.2756   1
   0  -9   7 782.366 47.5760   1
   0   9  -6 65.0953 18.7383   1
   0  -9   6 35.6530 12.2998   1
   0  -9   5 3.52742 7.86957   1
   0   9  -5 14.4539 10.0799   1
   0   9  -4 113.233 24.0477   1
   0  -9   4 75.3279 20.0660   1
   0  -9   4 95.6270 25.4642   5
   0   9  -3 45.6337 19.2018   1
   0  -9   3 26.6733 11.8293   1
   0  -9   3 21.2681 12.2959   5
   0   9  -2 18.4664 19.3869   1
   0  -9   2 34.1523 20.5318   1
   0  -9   2-6.99845 10.9012   5
   0  -9   1 14.8351 19.1728   1
   0  -9   1 11.5611 9.76274   5
   0   9  -1 19.1230 21.0068   1
   0   9   0 530.088 57.9339   1
   0  -9   0 487.795 50.2941   5
   0  -9  -1 165.653 30.3052   5
   0   9   1 146.260 31.0192   1
   0   9   2 35.6534 25.5638   1
   0   9   3 229.887 44.5518   1
   0   9   4 0.53470 15.8775   2
   0   9   4-2.56283 20.7719   1
   0   9   5 503.912 69.8118   2
   0   9   5 571.284 74.7627   1
   0   9   6-14.1488 22.2432   1
   0   9   7-3.06972 22.2028   1
   0   9   8 324.012 63.6686   1
   0   9   9-10.4905 32.7913   1
   0   9  10 45.7434 35.9849   1
   0   9  11 88.2451 44.6968   1
   0   9  12 19.5570 28.4026   1
   0   9  13-28.4712 33.9931   1
   0   9  14 30.1487 22.4158   1
   0   9  15-24.0894 28.5734   1
   0   9  16 69.1449 36.1380   1
   0 -10  26-4.23145 32.0679   3
   0 -10  25 172.596 78.0373   3
   0 -10  24 7.64205 15.1741   5
   0 -10  24 32.8608 51.7319   3
   0 -10  23 153.535 65.6595   3
   0 -10  23 44.4810 28.5593   5
   0 -10  22 0.56770 24.3766   3
   0 -10  22 78.2334 34.6371   5
   0 -10  21 183.929 49.6363   5
   0  10 -21 150.035 30.8345   2
   0 -10  20 72.3239 29.6612   5
   0 -10  20 21.1559 13.4983   1
   0  10 -20 23.7248 13.4937   2
   0 -10  19 58.3443 24.0717   5
   0 -10  19 22.9290 10.7436   1
   0  10 -19 34.0309 15.5370   2
   0 -10  18 473.472 69.4074   5
   0  10 -18 452.650 46.5887   2
   0 -10  18 486.400 40.5423   1
   0 -10  18 414.063 47.3266   1
   0 -10  17 441.051 64.8876   5
   0  10 -17 420.349 44.2009   2
   0 -10  17 373.661 34.0925   1
   0 -10  17 402.105 44.1642   1
   0  10 -16 318.219 36.8475   2
   0 -10  16 447.266 65.0067   5
   0 -10  16 319.484 36.3763   1
   0 -10  15 21.0482 10.4465   1
   0 -10  15-10.8851 17.9398   5
   0  10 -15 29.3859 14.2874   2
   0 -10  14 898.819 51.8016   1
   0 -10  14 886.112 88.1655   5
   0  10 -14 716.346 55.7514   2
   0 -10  13 14.3246 14.7909   5
   0  10 -13-0.99711 14.2037   4
   0  10 -13 13.3532 10.5411   2
   0 -10  13-2.05751 9.08529   1
   0 -10  12 44.0732 10.1158   1
   0  10 -12 37.5587 16.7109   2
   0  10 -12 25.9000 18.2192   4
   0 -10  12 39.6572 21.6072   5
   0 -10  11 17.2773 6.77986   1
   0  10 -11 36.4559 19.8485   4
   0 -10  11 40.4326 15.3460   5
   0  10 -11 43.8041 13.8072   2
   0 -10  10 458.133 32.4083   1
   0  10 -10 471.399 50.6539   2
   0  10 -10 435.363 57.4293   4
   0 -10   9 1365.88 58.7444   1
   0  10  -9 1277.39 93.7879   4
   0  10  -9 1207.68 70.9129   1
   0 -10   8 2225.98 82.0093   1
   0  10  -8 2171.46 95.8045   1
   0  10  -7 7796.54 187.409   1
   0 -10   7 7841.82 159.948   1
   0 -10   6 282.785 32.7350   1
   0  10  -6 246.432 34.9965   1
   0  10  -5 3895.33 137.719   1
   0 -10   5 3600.70 122.860   1
   0  10  -4 10.1864 13.1953   1
   0 -10   4 5.51223 10.0439   1
   0 -10   3 99.5184 23.8114   1
   0  10  -3 127.957 29.1388   1
   0  10  -2 1253.25 85.9561   1
   0 -10   2 1260.90 85.4445   1
   0 -10   2 1253.74 87.0045   5
   0  10  -1 72.2408 22.8220   1
   0 -10   1 106.521 25.6472   5
   0  10   0 3682.56 160.401   2
   0  10   0 3848.51 163.860   1
   0 -10   0 3570.05 147.171   5
   0  10   1 90.4709 27.1926   2
   0 -10  -1 74.7295 22.0921   5
   0  10   1 69.8644 25.8510   1
   0  10   2 14.1525 18.7583   1
   0  10   2 8.38158 17.4024   2
   0  10   3 956.195 90.9041   1
   0  10   3 836.072 85.2477   2
   0  10   4-1.50419 15.7125   1
   0  10   4-1.53261 14.0109   2
   0  10   5 3144.53 180.373   1
   0  10   6 171.566 44.6834   1
   0  10   7 93.0906 43.0504   1
   0  10   8 404.614 73.3065   1
   0  10   9 294.551 65.5140   1
   0  10  10-40.9089 35.9730   1
   0  10  11 56.2431 30.9685   1
   0  10  12-37.6327 42.6911   1
   0  10  13 84.0270 41.1663   1
   0  10  14 8.82082 25.0380   1
   0  10  15 38.3610 40.8887   1
   0 -11  26-42.6778 45.3361   3
   0 -11  25-16.8730 36.5690   3
   0 -11  25 41.7467 35.7121   5
   0 -11  24-16.1298 22.4637   5
   0 -11  24-95.8525 57.6935   3
   0 -11  23 3.32964 15.6344   5
   0 -11  23-116.031 61.0142   3
   0 -11  22-18.0122 19.9487   5
   0 -11  21 75.6452 33.8607   5
   0  11 -20 32.8854 12.9189   2
   0 -11  20 3.44235 25.6248   5
   0  11 -19 66.3626 19.3789   2
   0 -11  19 72.3074 31.8118   5
   0 -11  19 53.6693 13.4372   1
   0  11 -18 43.6195 16.1672   2
   0 -11  18 19.6633 22.5061   5
   0 -11  18 41.1645 10.9181   1
   0 -11  18 39.1295 13.5592   1
   0 -11  17 171.719 45.3208   5
   0 -11  17 142.129 18.4586   1
   0 -11  17 190.494 25.4034   1
   0  11 -17 188.200 29.2593   2
   0  11 -16 112.051 21.0783   2
   0 -11  16 111.539 35.5358   5
   0 -11  16 126.282 18.3028   1
   0  11 -15-0.30815 8.03775   2
   0 -11  15-7.20481 6.78952   1
   0 -11  15-4.99525 15.8209   5
   0  11 -14 0.82458 8.37509   2
   0 -11  14 2.01232 4.89861   1
   0 -11  14-1.90244 18.7160   5
   0  11 -13 20.2881 13.1452   2
   0 -11  13-11.4929 26.1663   5
   0 -11  13 7.36741 5.64666   1
   0  11 -12 4.51599 9.82268   2
   0 -11  12 17.5580 7.92359   1
   0 -11  12 38.7839 21.4005   5
   0 -11  11 1.82732 11.2824   5
   0  11 -11 19.5857 16.4916   2
   0 -11  11-1.92867 5.56007   1
   0 -11  10 16.2310 8.43646   1
   0 -11   9 95.8097 18.5086   1
   0  11  -9 75.4608 22.0369   1
   0 -11   8 24.4870 14.4535   1
   0  11  -8 8.56267 14.4059   1
   0 -11   7 232.350 30.4347   1
   0  11  -7 259.303 37.3075   1
   0 -11   6 21.3551 20.1753   5
   0 -11   6 9.37409 10.9254   1
   0  11  -6-14.4116 17.1525   1
   0 -11   5 46.2530 19.4147   1
   0  11  -5 37.6219 19.9609   1
   0  11  -4 232.717 36.4170   1
   0 -11   4 198.375 32.9116   1
   0  11  -3-3.70780 16.6483   1
   0 -11   3-12.9981 18.2018   1
   0  11  -2 31.3186 17.6038   1
   0  11  -1 13.4036 11.3098   2
   0  11  -1 19.0966 17.8630   1
   0  11   0 116.446 34.1752   2
   0  11   0 111.339 32.7563   1
   0  11   1 18.0511 15.2422   2
   0  11   1 18.1582 18.2850   1
   0 -11  -1-7.99831 16.4690   5
   0  11   2 302.802 53.8631   1
   0  11   2 352.348 58.6497   2
   0  11   3 6.31149 23.8348   1
   0  11   4 61.3552 36.5342   1
   0  11   5 210.994 51.8284   1
   0  11   6 40.1227 34.4913   1
   0  11   7-13.1820 25.2285   1
   0  11   8-6.22111 25.6273   1
   0  11   9 15.0255 20.0031   1
   0  11  10 44.3561 34.7782   1
   0  11  11 40.9329 22.3862   1
   0  11  12 33.3483 35.0778   1
   0  11  13 89.2584 53.1517   1
   0  11  14-11.3524 35.2726   1
   0 -12  26 17.6698 46.4176   3
   0 -12  25 132.118 55.2299   5
   0 -12  25 95.5414 75.6473   3
   0 -12  24 7.91955 23.8521   5
   0 -12  24 49.9483 52.2196   3
   0 -12  23-33.4154 32.0296   5
   0 -12  22 2.50050 22.9224   5
   0  12 -21 127.895 34.9728   4
   0 -12  21 148.389 47.0561   5
   0  12 -20 25.7594 13.1756   4
   0  12 -20 51.6378 15.3233   2
   0 -12  20 42.0466 23.2864   5
   0  12 -19-7.77283 19.3658   4
   0 -12  19 13.7952 19.7900   5
   0  12 -19 7.42091 7.80612   2
   0 -12  18 42.9045 27.8629   5
   0 -12  18 55.5025 9.17392   1
   0  12 -18 63.0003 23.5377   4
   0  12 -18 81.1251 19.1607   2
   0 -12  18 67.9644 10.9981   1
   0  12 -17 869.070 58.2654   2
   0 -12  17 843.475 33.5056   1
   0 -12  17 817.217 35.8319   1
   0 -12  17 972.349 102.525   5
   0  12 -16 1897.48 87.9466   2
   0 -12  16 1830.43 52.4271   1
   0 -12  16 1958.46 143.652   5
   0 -12  15 549.779 76.9412   5
   0 -12  15 523.765 28.4342   1
   0  12 -15 510.695 48.2350   2
   0 -12  14 646.085 33.2389   1
   0 -12  14 527.530 72.6339   5
   0  12 -14 491.292 50.5891   2
   0  12 -13 120.331 27.9872   2
   0 -12  13 121.341 35.7888   5
   0 -12  13 109.715 15.3673   1
   0 -12  12 1014.40 96.0784   5
   0  12 -12 972.946 77.2634   2
   0 -12  12 991.477 49.2240   1
   0  12 -11 24.8598 15.5065   2
   0 -12  11-2.30193 15.0233   5
   0 -12  11 31.9609 9.74515   1
   0 -12  10 173.309 24.1011   1
   0 -12  10 126.017 34.6334   5
   0  12 -10 157.478 28.9729   1
   0  12  -9 902.303 89.0612   4
   0 -12   9 973.925 93.8246   5
   0  12  -9 1000.58 76.5948   1
   0 -12   9 658.194 49.3438   1
   0  12  -8 455.600 51.0742   1
   0 -12   8 456.026 62.7993   5
   0 -12   8 579.730 48.2658   1
   0  12  -7 6215.93 190.668   1
   0 -12   7 6445.89 228.611   5
   0 -12   7 6218.32 168.050   1
   0 -12   6 1750.51 122.016   5
   0 -12   6 1220.91 80.0091   1
   0 -12   5 62.3333 25.4871   5
   0  12  -5 77.0849 23.9392   1
   0 -12   5 98.8730 25.4227   1
   0  12  -4 520.454 59.1636   1
   0 -12   4 553.759 65.4948   5
   0 -12   4 482.324 55.1551   1
   0 -12   3 352.636 52.7565   5
   0  12  -3 373.899 51.7575   1
   0  12  -2-13.0477 16.1098   1
   0  12  -2-1.70721 12.6300   2
   0  12  -1 557.716 67.2545   2
   0  12  -1 594.141 69.8297   1
   0  12   0 105.426 36.6783   1
   0  12   0 111.161 32.6114   2
   0  12   1 377.111 60.1702   1
   0  12   1 339.751 55.6708   2
   0  12   2 1556.83 123.332   1
   0  12   3 469.343 71.0263   1
   0  12   4-1.50339 28.4545   1
   0  12   5 1692.52 142.219   1
   0  12   6 260.664 64.1300   1
   0  12   7 23.7299 21.4404   1
   0  12   8 21.5768 28.1676   1
   0  12   9 70.3831 42.8450   1
   0  12  10 163.428 57.8364   1
   0  12  11 32.2326 31.5343   1
   0  12  12 222.458 74.2124   1
   0 -13  26 50.3332 44.4279   5
   0 -13  26-110.796 66.8602   3
   0 -13  25 7.41470 39.7894   3
   0 -13  25 38.5003 37.1761   5
   0 -13  24 2.13134 19.1333   5
   0 -13  23 33.1640 28.6452   5
   0 -13  22 1.75774 26.0304   5
   0  13 -21 41.0860 25.0805   4
   0 -13  21 2.85553 17.6753   5
   0 -13  20 8.20234 15.4311   5
   0  13 -20 23.7592 24.7693   4
   0  13 -19 17.5358 13.4847   4
   0 -13  19-5.70560 15.4834   5
   0  13 -19 3.25780 9.03259   2
   0  13 -18-4.03839 19.6069   4
   0 -13  18 24.4268 20.9246   5
   0  13 -18 12.4265 10.0075   2
   0  13 -17 3.64363 18.3569   4
   0 -13  17 54.7505 25.5007   5
   0  13 -17 64.6146 17.0698   2
   0  13 -16 25.5763 23.2461   4
   0  13 -16 12.3205 8.32338   2
   0 -13  16 43.2058 29.0276   5
   0  13 -15-5.20368 16.4854   2
   0  13 -15-3.27475 24.2973   4
   0 -13  14-8.63866 20.2165   5
   0  13 -14 16.9605 18.6751   4
   0 -13  14 5.74052 5.99645   1
   0  13 -14 8.11290 11.9237   2
   0  13 -13 18.8607 19.5150   4
   0  13 -13-9.20562 13.8723   2
   0 -13  13 0.49671 4.82487   1
   0 -13  13 15.0191 17.6511   5
   0  13 -12 44.6799 31.4909   2
   0  13 -12 3.33793 15.8132   4
   0 -13  12-11.5642 18.8666   5
   0 -13  12 6.65058 9.04583   1
   0 -13  11 16.3359 9.85450   1
   0 -13  11-11.3864 11.4364   5
   0  13 -11-4.59529 9.96978   1
   0  13 -11 14.4647 12.8081   4
   0 -13  10 43.6818 19.2695   1
   0  13 -10 22.4271 16.8825   1
   0 -13  10 66.4489 38.0537   5
   0  13 -10 21.7534 22.2856   4
   0 -13   9 20.0925 14.4873   1
   0  13  -9 59.9734 22.0527   1
   0 -13   9-4.07423 12.8770   5
   0  13  -8 21.5136 18.0577   1
   0 -13   8 54.5447 28.3925   5
   0 -13   8 47.1525 18.0029   1
   0 -13   7 1.52469 15.0541   5
   0 -13   7 24.5539 16.2148   1
   0  13  -7 12.6049 19.1622   1
   0 -13   6 183.227 33.3747   1
   0 -13   6 200.633 46.0447   5
   0  13  -6 122.111 31.6599   1
   0 -13   5 38.3357 16.5410   1
   0  13  -5 41.5509 21.5541   1
   0 -13   5 57.9864 24.0891   5
   0 -13   4 222.840 44.5476   5
   0  13  -4 198.541 41.0286   1
   0  13  -3 122.779 33.2857   1
   0 -13   3 129.904 33.0369   5
   0  13  -3 110.689 30.8405   2
   0  13  -2 25.2068 17.7087   2
   0 -13   2 42.3259 25.5957   5
   0  13  -2 2.62647 16.1798   1
   0  13  -1 16.7341 15.6721   2
   0 -13   1-8.96157 18.2525   5
   0  13  -1 9.12380 15.7735   1
   0  13   0 55.6033 31.5589   1
   0  13   0 39.8324 22.0921   2
   0  13   1 6.41523 19.1445   1
   0  13   2 20.0682 19.0500   1
   0  13   3 88.0912 38.7577   1
   0  13   4 49.2913 28.0034   1
   0  13   5 34.6129 29.3708   1
   0  13   6 39.3630 31.9689   1
   0  13   7 48.1500 31.4673   1
   0  13   8 5.71184 21.6574   1
   0  13   9 62.7560 37.9114   1
   0  13  10 27.1346 30.2663   1
   0  13  11-7.77711 26.9631   1
   0 -14  26 121.617 60.2903   5
   0 -14  26 19.6802 50.7093   3
   0 -14  25 96.0941 51.7237   5
   0 -14  24 0.20374 22.2913   5
   0 -14  23 108.944 46.1919   5
   0 -14  22 69.6823 30.7767   5
   0  14 -21 137.643 40.3997   4
   0 -14  21 163.910 55.4936   5
   0  14 -20 19.7369 17.8830   4
   0 -14  20-47.6624 26.7487   5
   0 -14  19 152.379 49.7605   5
   0  14 -19 128.425 39.4905   4
   0  14 -19 88.7010 17.0887   2
   0 -14  18 33.8808 37.6439   5
   0  14 -18 7.35521 7.61999   2
   0  14 -18 11.0044 15.2495   4
   0  14 -17 156.313 45.4747   4
   0  14 -17 170.271 25.6568   2
   0 -14  17 148.880 43.9898   5
   0 -14  16 56.2920 34.6219   5
   0  14 -16-2.58495 26.7152   4
   0  14 -16 13.6833 14.5861   2
   0 -14  15 401.671 22.9419   1
   0  14 -15 379.739 67.1602   4
   0  14 -15 403.921 48.7027   2
   0 -14  15 457.008 74.9404   5
   0  14 -14 40.0286 20.4908   2
   0 -14  14 38.2632 11.6645   1
   0  14 -14 27.9752 18.8033   4
   0 -14  14 31.8279 26.0036   5
   0  14 -13 46.6671 23.4325   2
   0 -14  13 41.0231 11.9684   1
   0 -14  13 76.1003 33.4775   5
   0  14 -13 18.6908 23.7043   4
   0  14 -12 45.1922 25.3135   2
   0 -14  12 59.1081 31.2793   5
   0  14 -12 35.6083 26.5614   4
   0 -14  12 36.4311 12.5598   1
   0  14 -11 495.003 71.5335   4
   0 -14  11 496.576 75.1289   5
   0  14 -11 401.597 48.4718   1
   0 -14  11 417.390 40.6329   1
   0 -14  10 73.7236 31.6723   5
   0  14 -10 37.4586 14.1930   1
   0 -14  10 63.9863 16.8401   1
   0  14 -10 91.6400 32.6864   4
   0 -14   9 24.6649 18.1750   5
   0 -14   9 27.7254 16.1810   1
   0  14  -9 10.4096 13.8996   1
   0 -14   8 3152.31 130.236   1
   0 -14   8 3226.88 179.064   5
   0  14  -8 3216.03 151.838   1
   0  14  -7 8611.41 254.224   1
   0 -14   7 7563.73 212.680   1
   0 -14   7 8279.57 285.297   5
   0  14  -6 2131.45 128.656   1
   0 -14   6 2224.35 145.725   5
   0 -14   5 945.187 95.0056   5
   0  14  -5 916.885 87.6178   1
   0 -14   4 401.671 61.4399   5
   0  14  -4 360.584 54.5757   2
   0  14  -4 337.136 56.1262   1
   0  14  -3 37.5229 19.2719   1
   0 -14   3 5.56637 13.0833   5
   0  14  -3 27.0468 14.6314   2
   0  14  -2 2955.89 162.410   2
   0 -14   2 2491.05 153.077   5
   0  14  -2 2925.84 165.418   1
   0 -14   1 204.196 45.0232   5
   0  14  -1 154.207 45.7145   1
   0  14   0 597.383 80.4701   1
   0  14   1 43.4786 29.3832   1
   0  14   2 37.9582 26.9247   1
   0  14   3 1172.47 122.650   1
   0  14   4-19.9579 19.4658   1
   0  14   5 52.5599 38.7237   1
   0  14   6-0.36606 20.6866   1
   0  14   7 173.581 53.4618   1
   0  14   8 13.6222 24.5399   1
   0  14   9 103.177 40.6508   1
   0  14  10 171.828 64.9531   1
   0 -15  26 39.4841 43.1066   5
   0 -15  25 28.9292 36.5511   5
   0 -15  24-11.5678 23.4042   5
   0 -15  23 11.0602 24.5933   5
   0 -15  22 11.5613 25.1777   5
   0  15 -21 5.68849 21.1952   4
   0 -15  21 0.75114 17.7576   5
   0 -15  20 26.3337 26.5900   5
   0  15 -20-20.1531 21.3241   4
   0  15 -19 23.4592 24.4637   4
   0 -15  19 28.4891 32.7280   5
   0 -15  18 15.5800 30.2993   5
   0  15 -18-2.79388 9.13257   2
   0  15 -18 30.6543 20.6154   4
   0 -15  17-16.8642 23.1189   5
   0  15 -17 3.59740 21.2281   4
   0  15 -17 13.0267 11.9680   2
   0  15 -16-12.1951 13.1490   2
   0  15 -16 5.19854 15.2337   4
   0 -15  16 6.91945 18.9833   5
   0  15 -15 26.9182 13.8090   2
   0 -15  15 38.2976 26.2674   5
   0  15 -15-2.22902 22.4500   4
   0 -15  14 19.0188 22.2785   5
   0  15 -14-24.2860 17.8744   2
   0  15 -14 2.89663 18.6052   4
   0  15 -13 27.0358 17.0140   4
   0 -15  13 36.3905 25.8572   5
   0 -15  13 12.2155 9.82410   1
   0  15 -13 7.46162 16.2111   2
   0 -15  12 57.8565 16.9442   1
   0  15 -12 28.5940 12.6301   1
   0  15 -12 50.9971 24.2090   4
   0 -15  12 55.6498 28.6218   5
   0 -15  11 33.5044 28.8232   5
   0 -15  11 33.1975 21.5999   1
   0  15 -11-12.6776 14.0974   1
   0  15 -11 20.9233 39.1019   4
   0  15 -10 53.3436 23.6430   1
   0  15 -10 63.7299 33.2290   4
   0 -15  10 50.3218 16.6064   1
   0 -15  10 62.9616 32.8189   5
   0 -15   9 35.0678 27.6458   5
   0 -15   9 20.2952 12.6234   1
   0  15  -9 24.8188 18.6331   1
   0 -15   8 20.4007 26.9207   5
   0  15  -8-8.81338 15.1265   1
   0 -15   7-5.36797 16.0148   5
   0  15  -7 13.4546 21.3376   1
   0  15  -6-6.02767 19.1082   1
   0 -15   6 54.3154 30.1454   5
   0 -15   5 792.404 90.4818   5
   0  15  -5 847.179 87.9213   1
   0  15  -5 815.307 81.4089   2
   0 -15   4 29.2421 21.6863   5
   0  15  -4 97.4067 33.8598   2
   0  15  -4 45.9112 24.7093   1
   0 -15   3-17.1027 16.0916   5
   0  15  -3 50.7610 24.2211   2
   0  15  -3-6.64457 18.1196   1
   0  15  -2 49.0122 30.3652   1
   0 -15   2 62.8837 25.9844   5
   0 -15   1 44.4951 19.2719   5
   0  15  -1 30.7746 21.2758   1
   0  15   0 48.1516 26.6841   1
   0  15   1 3.40608 23.2578   1
   0  15   2 113.750 45.4287   1
   0  15   3 57.0765 34.5176   1
   0  15   4-4.23313 23.6536   1
   0  15   5 26.1718 28.5502   1
   0  15   6 57.4703 46.2092   1
   0  15   7-12.8156 29.5983   1
   0  15   8-36.7464 25.6693   1
   0  15   9 43.1740 36.9155   1
   0 -16  25-12.0366 26.8127   5
   0 -16  24 48.2037 34.9492   5
   0 -16  23 124.248 48.6406   5
   0 -16  22 188.948 58.6621   5
   0  16 -21 15.0234 19.3045   4
   0 -16  21 13.6949 26.4715   5
   0  16 -20 45.2081 30.9499   4
   0 -16  20 38.2802 34.5032   5
   0 -16  19-13.1041 17.6892   5
   0  16 -19 15.0227 20.6971   4
   0  16 -18-49.2512 31.1626   4
   0 -16  18 37.3058 30.8102   5
   0  16 -17 21.4569 20.2669   4
   0  16 -17 10.5593 12.4018   2
   0 -16  17-22.1596 26.3514   5
   0  16 -16 65.7953 21.7998   2
   0  16 -16 75.9751 30.9664   4
   0 -16  16 92.0561 43.5140   5
   0  16 -15 335.528 50.8529   2
   0 -16  15 387.554 74.3168   5
   0  16 -15 363.404 69.2701   4
   0  16 -14 692.707 93.7538   4
   0  16 -14 699.000 78.5444   2
   0 -16  14 774.206 100.481   5
   0  16 -13 409.373 61.6171   2
   0  16 -13 449.874 73.9414   4
   0 -16  13 481.584 79.4029   5
   0  16 -12 753.233 94.9618   4
   0 -16  12 711.686 95.4355   5
   0  16 -12 817.346 75.4157   1
   0 -16  11 30.8933 27.0021   5
   0  16 -11 60.9547 34.3150   4
   0  16 -11 36.5519 21.5809   1
   0  16 -10 3903.29 180.010   1
   0 -16  10 3979.46 218.204   5
   0  16  -9 44.7988 28.0400   1
   0 -16   9-9.64605 24.2449   5
   0  16  -8 617.009 75.7792   1
   0 -16   8 347.819 65.0736   5
   0  16  -7-5.84627 19.8379   1
   0  16  -7 3.97081 9.95787   2
   0 -16   7 36.4433 27.7957   5
   0  16  -6 513.809 67.3111   2
   0  16  -6 663.446 80.9141   1
   0 -16   6 499.967 75.2378   5
   0  16  -5 40.3616 14.9100   2
   0  16  -5 64.5404 34.0641   1
   0 -16   5 100.101 33.2974   5
   0  16  -4 17.7828 19.8091   1
   0 -16   4-22.6173 27.5761   5
   0 -16   3 26.0890 24.6980   5
   0  16  -3 62.3745 27.7794   1
   0 -16   2 187.579 45.8153   5
   0  16  -2 251.912 57.8278   1
   0  16  -1 218.003 53.6778   1
   0  16   0 167.167 47.3354   1
   0  16   1 36.8044 19.6673   1
   0  16   2 38.6980 21.7492   1
   0  16   3 27.4635 27.4575   1
   0  16   4 28.0860 25.5595   1
   0  16   5 45.8833 34.0475   1
   0  16   6 37.8599 28.3636   1
   0  16   7 41.6543 41.8455   1
   0  16   8 113.324 52.5884   1
   0 -17  24-0.23757 27.1127   5
   0 -17  23 4.10098 28.9490   5
   0 -17  22-14.4446 22.7289   5
   0  17 -21 13.2058 28.7633   4
   0 -17  21 18.3117 20.9911   5
   0  17 -20-2.55639 28.4060   4
   0 -17  20 16.6336 28.8649   5
   0  17 -19-6.78388 16.5840   4
   0 -17  19 56.9586 38.6942   5
   0  17 -18-57.6615 32.6814   4
   0 -17  18-12.3611 27.2736   5
   0  17 -17 16.4623 28.4370   4
   0 -17  17 7.39576 21.4690   5
   0  17 -16 39.6082 29.5928   4
   0 -17  16 49.9079 32.6200   5
   0  17 -16 13.6892 21.8672   2
   0 -17  15 1.75910 21.6122   5
   0  17 -15 2.69633 23.1756   4
   0  17 -15 0.10294 21.2586   2
   0 -17  14 123.196 48.7376   5
   0  17 -14 80.0575 42.1852   2
   0  17 -14 36.5504 40.9406   4
   0  17 -13-6.95815 18.9647   4
   0 -17  13 32.2105 26.5932   5
   0  17 -13 8.39938 15.8619   1
   0  17 -12 25.7724 18.1903   1
   0 -17  12-11.2827 20.5577   5
   0  17 -12 1.26929 18.2848   4
   0  17 -11 36.9972 13.6338   1
   0  17 -11 56.4464 34.4406   4
   0 -17  11 92.0355 36.1365   5
   0  17 -10 37.3092 20.9762   1
   0 -17  10 9.83086 31.0678   5
   0 -17   9 12.4363 17.2749   5
   0  17  -9 16.2465 19.5828   1
   0 -17   8 13.5780 26.2548   5
   0  17  -8 12.0762 10.9877   2
   0  17  -8-8.51419 21.6520   1
   0  17  -7 315.194 57.3771   1
   0 -17   7 245.350 55.6222   5
   0  17  -7 247.993 46.1470   2
   0 -17   6 43.7785 32.8147   5
   0  17  -6 36.7658 24.6739   1
   0  17  -6-5.82302 17.4395   2
   0  17  -5 134.014 39.4254   1
   0 -17   5 46.7961 29.8826   5
   0  17  -4 1.13119 18.5992   1
   0 -17   4-27.4158 20.4065   5
   0 -17   3 38.9185 28.4281   5
   0  17  -3 112.721 43.4154   1
   0  17  -2 1.54262 21.1660   1
   0  17  -1 28.5120 22.6267   1
   0  17   0-11.1129 20.5206   1
   0  17   1 9.15954 24.4202   1
   0  17   2-2.41199 26.5763   1
   0  17   3-24.6464 18.2382   1
   0  17   4 35.8452 21.1721   1
   0  17   5 79.3903 47.8151   1
   0  17   6 38.3946 41.2494   1
   0 -18  23 40.3550 41.9139   5
   0 -18  22 21.5524 31.7543   5
   0 -18  21 136.741 51.0515   5
   0  18 -21 88.0350 40.7054   4
   0  18 -20 18.4441 24.1847   4
   0 -18  20 14.4535 29.4937   5
   0  18 -19 178.139 60.5089   4
   0 -18  19 131.243 51.5893   5
   0  18 -18 35.8077 21.4649   4
   0 -18  18 162.618 55.1491   5
   0  18 -17 354.404 74.5785   4
   0 -18  17 498.032 89.4765   5
   0 -18  16 363.274 77.7284   5
   0  18 -16 363.485 56.0564   2
   0  18 -16 296.957 66.3690   4
   0  18 -15 418.456 82.9670   4
   0 -18  15 524.933 90.8496   5
   0  18 -15 435.155 67.1454   2
   0  18 -14 33.6686 24.2337   2
   0  18 -14-11.4458 20.3922   4
   0 -18  14-53.6768 38.0304   5
   0  18 -13 285.945 70.0757   4
   0 -18  13 428.471 78.6731   5
   0  18 -13 419.245 58.4552   1
   0  18 -12 536.935 67.4923   1
   0 -18  12 710.740 102.475   5
   0  18 -12 457.293 81.3957   4
   0 -18  11 28.9004 30.0170   5
   0  18 -11 23.5108 25.3656   4
   0  18 -11 12.5650 19.9004   1
   0  18 -10-19.9711 24.4266   1
   0 -18  10 0.35074 16.6912   5
   0  18 -10-2.05505 10.7792   2
   0 -18   9 401.143 76.3565   5
   0  18  -9 393.453 66.5940   1
   0  18  -9 245.199 47.3692   2
   0  18  -8 212.286 49.5252   1
   0  18  -8 122.021 31.6415   2
   0 -18   8 187.776 54.7466   5
   0 -18   7-39.5722 33.3624   5
   0  18  -7 70.8646 32.4955   1
   0 -18   6 279.000 61.9019   5
   0  18  -6 311.971 62.6502   1
   0 -18   5 219.578 55.6388   5
   0  18  -5 254.085 61.6161   1
   0 -18   4 693.235 99.4088   5
   0  18  -4 759.369 99.4947   1
   0 -18   3 137.498 45.8835   5
   0  18  -3 149.941 49.6717   1
   0  18  -2-15.0869 28.5625   1
   0  18  -1 55.0848 43.9633   1
   0  18   0 13.9277 27.7028   1
   0  18   1 45.4476 39.1780   1
   0  18   2 191.489 66.9099   1
   0  18   3-49.4312 39.0100   1
   0  18   4 64.2520 44.7378   1
   0  18   5-9.91450 30.5854   1
   0 -19  21 30.8425 28.8954   5
   0 -19  20-44.5538 34.5639   5
   0  19 -20-15.8714 23.7155   4
   0  19 -19-74.3062 38.9867   4
   0 -19  19-20.0984 22.5539   5
   0  19 -18 0.20256 21.4192   4
   0 -19  18 38.7330 33.7589   5
   0 -19  17-36.5462 31.5717   5
   0  19 -17-5.34100 22.1244   4
   0  19 -16 111.869 53.0060   4
   0 -19  16 185.864 66.2750   5
   0  19 -15-13.9218 21.2415   2
   0  19 -15 8.21238 28.4832   4
   0 -19  15 15.8983 26.8089   5
   0 -19  14-17.4166 20.3527   5
   0  19 -14-31.6678 27.7068   4
   0  19 -13 38.2529 24.5133   1
   0 -19  13-26.1946 27.1742   5
   0  19 -13 30.7030 29.5626   4
   0  19 -12 4.62772 13.3197   1
   0  19 -12-0.85013 10.4017   2
   0 -19  12 46.3044 30.7482   5
   0  19 -12-58.7014 32.7261   4
   0  19 -11 3.77778 17.1533   1
   0 -19  11-24.8325 34.9830   5
   0  19 -11 12.8093 18.6111   4
   0  19 -11-1.72137 16.9553   2
   0 -19  10 38.8940 27.6017   5
   0  19 -10-3.87307 16.9122   1
   0  19 -10-7.24036 16.7348   2
   0  19  -9 74.5949 32.9426   1
   0 -19   9 15.3023 30.9305   5
   0 -19   8 7.50515 19.0529   5
   0  19  -8 7.28083 17.8839   1
   0  19  -7 129.274 42.4546   1
   0 -19   7 105.084 44.1587   5
   0  19  -6 7.08631 19.7066   1
   0 -19   6 106.830 46.7787   5
   0 -19   5 13.3543 25.6509   5
   0  19  -5 71.9825 34.3719   1
   0  19  -4 28.5517 31.4009   1
   0 -19   4 54.7685 31.9963   5
   0  19  -3 78.7687 34.8795   1
   0  19  -2-19.6672 28.9857   1
   0  19  -1 11.2447 26.1301   1
   0  19   0-9.51192 28.8240   1
   0  19   1 13.9954 26.6265   1
   0  19   2-0.22275 28.1941   1
   0  19   3 24.4697 26.5319   1
   0 -20  20 117.637 54.7976   5
   0  20 -20 120.937 53.1670   4
   0  20 -19 9.53028 21.5179   4
   0 -20  19 67.9176 43.8590   5
   0 -20  18 113.087 49.4554   5
   0  20 -18 22.8847 38.8168   4
   0  20 -17 52.9347 33.3561   4
   0 -20  17 46.2175 33.0766   5
   0 -20  16 187.046 60.7783   5
   0  20 -16 172.188 56.4815   4
   0 -20  15 163.765 54.7656   5
   0  20 -15 164.524 61.8258   4
   0  20 -14 385.820 80.3899   4
   0 -20  14 556.694 100.725   5
   0 -20  13 80.9988 34.7851   5
   0  20 -13 151.818 41.8478   1
   0  20 -13 162.270 54.6927   4
   0  20 -12 250.372 54.5210   1
   0  20 -12 298.333 72.2942   4
   0 -20  12 283.563 71.8721   5
   0  20 -11 13.0635 23.8636   4
   0  20 -11 41.2638 29.1434   1
   0 -20  11 14.8143 24.4331   5
   0  20 -10 137.803 46.8822   1
   0 -20  10 40.7552 28.2960   5
   0 -20   9 8.22303 31.0744   5
   0  20  -9 27.7816 22.5314   1
   0  20  -8 257.029 61.5181   1
   0 -20   8 188.664 58.8449   5
   0  20  -7 4.62831 30.3831   1
   0 -20   7-37.9398 27.7568   5
   0 -20   6 75.9233 43.4824   5
   0  20  -6 21.8684 23.2280   1
   0  20  -5-7.89231 17.9511   1
   0 -20   5 3.46522 22.1643   5
   0  20  -4 52.3366 37.4265   1
   0  20  -3 126.759 49.5531   1
   0  20  -2 70.0760 26.6097   1
   0  20  -1 28.8274 30.9322   1
   0  20   0 26.1126 34.7816   1
   0  20   1 2.31252 25.3910   1
   0  20   2-101.203 49.5826   1
   0  21 -20-119.435 50.7264   4
   0  21 -19-20.9138 27.1930   4
   0 -21  18 4.98112 24.8160   5
   0  21 -18-48.2563 34.6256   4
   0  21 -17-6.91099 20.9604   4
   0 -21  17-49.0755 34.6839   5
   0  21 -16 1.97966 19.5844   4
   0 -21  16-14.3884 26.6139   5
   0  21 -15-94.5830 43.3878   4
   0 -21  15 11.8231 37.6238   5
   0 -21  14 20.0396 26.8004   5
   0  21 -14 61.3022 40.5530   4
   0  21 -13 3.22483 28.7462   4
   0 -21  13-0.46065 19.0366   5
   0  21 -12-5.55300 16.1567   1
   0  21 -12 34.8470 35.5154   4
   0 -21  12 4.78023 21.9197   5
   0 -21  11-63.4368 44.3334   5
   0  21 -11-55.5670 34.0251   1
   0  21 -11-2.35401 28.4425   4
   0  21 -10 18.8136 16.4424   1
   0 -21  10 4.93305 24.2511   5
   0  21  -9-8.99761 29.5807   1
   0 -21   9-61.1226 38.0370   5
   0 -21   8-18.1052 41.6726   5
   0  21  -8 8.70396 25.8450   1
   0 -21   7 151.537 52.4243   5
   0  21  -7 109.102 43.9288   1
   0  21  -6 55.7895 27.8280   1
   0 -21   6 10.8634 36.9195   5
   0  21  -5 25.4977 21.7914   1
   0  21  -4 107.411 43.2105   1
   0  21  -3-5.51511 22.1016   1
   0  21  -2 50.8576 44.8494   1
   0  21  -1 87.3825 43.9183   1
   0  21   0 78.1606 50.6964   1
   0  21   1 5.78746 31.7957   1
   0  22 -20-8.78827 25.6956   4
   0  22 -19 8.74542 28.3958   4
   0  22 -18-0.23911 20.5850   4
   0  22 -17 130.792 56.1758   4
   0  22 -16 72.4358 42.0023   4
   0 -22  16 32.7594 26.6550   5
   0  22 -15 122.129 55.8923   4
   0 -22  15 103.974 49.0410   5
   0  22 -14 25.7974 27.6994   4
   0 -22  14-39.9708 28.7681   5
   0 -22  13 7.45535 25.7321   5
   0  22 -13 38.3943 41.9237   4
   0 -22  12 119.826 54.3593   5
   0  22 -12 161.156 60.7952   4
   0  22 -11 74.2253 45.3138   4
   0 -22  11 104.642 51.8847   5
   0 -22  10 354.480 85.1227   5
   0  22 -10 335.661 71.3145   1
   0  22  -9 143.640 50.4409   1
   0 -22   9 241.882 72.6947   5
   0  22  -8 74.7694 40.8103   1
   0 -22   8 32.5270 33.5089   5
   0  22  -7 66.3763 34.9171   1
   0 -22   7 54.9355 31.3969   5
   0  22  -6-0.40864 26.7768   1
   0  22  -5 50.2995 45.8221   1
   0  22  -4 26.6012 31.6925   1
   0  22  -3 116.560 55.7673   1
   0  22  -2 187.715 71.2944   1
   0  22  -1 71.3773 39.5429   1
   0  23 -19 6.66524 26.0914   4
   0  23 -18-49.4736 38.4883   4
   0  23 -17-0.25200 20.5159   4
   0  23 -16-14.7592 25.7262   4
   0  23 -15 3.24267 21.0965   4
   0  23 -14-54.0169 38.3892   4
   0  23 -13 37.0684 32.1658   4
   0 -23  13 62.9648 31.9559   5
   0 -23  12 54.2728 45.9095   5
   0  23 -12 156.773 64.5765   4
   0  23 -11 51.9306 35.1481   4
   0 -23  11-27.1851 26.9597   5
   0 -23  10 14.8979 26.2138   5
   0  23  -9 28.8061 38.4831   1
   0 -23   9 8.43014 38.3616   5
   0  23  -8 3.70906 25.5906   1
   0 -23   8-65.9016 41.4534   5
   0  23  -7 18.0146 24.6221   1
   0  23  -6 16.9014 27.3614   1
   0  23  -5 19.6435 33.4761   1
   0  23  -4 52.0049 32.3790   1
   0  23  -3 98.8031 54.9276   1
   0  24 -19 0.81214 29.5565   4
   0  24 -18 65.6522 55.0279   4
   0  24 -17 43.9830 42.8984   4
   0  24 -16 6.14221 27.4258   4
   0  24 -15 22.1599 22.4247   4
   0  24 -14 53.9479 45.9994   4
   0  24 -13 0.26746 34.6538   4
   0 -24  10 31.4296 37.0624   5
   0 -24   9 0.28335 32.3094   5
   0  24  -7 12.5869 32.4377   1
   0  24  -6 31.1354 40.6274   1
   0  24  -5 28.5769 36.5784   1
   0  24  -4 60.8615 51.2770   1
  -1  24  -4 50.6572 50.9417   1
  -1  24  -5 31.9340 43.8370   1
  -1  24 -16 14.6381 34.7376   4
  -1  24 -17 0.28881 31.9618   4
  -1  24 -18 6.13321 40.5003   4
  -1  24 -19 8.53986 41.7329   4
  -1  23  -2 22.1331 43.1311   1
  -1  23  -3-43.5603 37.0063   1
  -1  23  -4 42.2023 39.4840   1
  -1  23  -5 1.90099 23.9709   1
  -1  23  -6-48.0356 37.9447   1
  -1  23  -7 38.4607 37.4009   1
  -1  23  -9-89.9569 39.4911   4
  -1  23 -10 93.3883 46.5959   4
  -1  23 -11 134.380 62.1427   4
  -1  23 -12 146.205 67.2834   4
   1 -23  12 20.2236 40.4334   5
  -1  23 -13 40.4046 40.2906   4
   1 -23  13 30.8750 35.1149   5
  -1  23 -14-54.0982 40.7993   4
  -1  23 -15 84.0842 53.8806   4
  -1  23 -16 63.3269 45.9599   4
  -1  23 -17-71.2439 44.7162   4
  -1  23 -18 0.55520 26.3055   4
  -1  23 -19 36.6349 42.2607   4
  -1  23 -20 1.98497 37.9021   4
  -1  22   0 0.96584 24.0099   1
  -1  22  -1 22.8993 36.1027   1
  -1  22  -2-27.0047 33.3923   1
  -1  22  -3 0.63549 25.5443   1
  -1  22  -4 72.7326 36.6558   1
  -1  22  -5 6.00740 18.7946   1
  -1  22  -6-2.77444 19.8874   1
  -1  22  -7-12.8724 21.0049   1
  -1  22  -8-20.8402 27.4813   1
  -1  22  -8-49.6358 36.5780   4
  -1  22  -9 21.7681 23.5414   1
  -1  22  -9 18.3405 26.6690   4
  -1  22 -10 100.197 52.5304   4
   1 -22  11 112.701 58.2573   5
  -1  22 -11 248.375 74.1689   4
  -1  22 -12 401.483 92.3242   4
   1 -22  12 456.289 105.876   5
  -1  22 -13-93.7661 49.7130   4
   1 -22  13 1.63021 32.9855   5
   1 -22  14-41.7030 38.1784   5
  -1  22 -14 7.75337 22.0268   4
   1 -22  15 1.94493 33.1962   5
  -1  22 -15 46.2615 37.1552   4
  -1  22 -16 15.8305 33.8521   4
  -1  22 -17-7.74827 24.6749   4
  -1  22 -18-1.84522 23.2558   4
  -1  22 -19 0.26664 46.8607   4
  -1  22 -20 1.62350 25.4484   4
  -1  22 -21 1.92233 27.5235   4
  -1  21   1-6.93615 25.7726   1
  -1  21   0 1.55043 19.5027   1
  -1  21  -1 1.48414 20.8397   1
  -1  21  -2-62.1103 36.1617   1
  -1  21  -3 28.6521 23.7535   1
  -1  21  -4 23.8452 22.1671   1
  -1  21  -5 33.4296 28.2116   1
  -1  21  -6-2.86734 19.4631   1
  -1  21  -7 69.6760 40.5876   1
  -1  21  -8-8.51357 20.0987   1
  -1  21  -8 22.8770 34.0620   4
  -1  21  -9 70.4926 39.6568   4
   1 -21   9 60.7583 41.9843   5
  -1  21  -9 50.4985 29.7310   1
   1 -21  10-0.73995 26.4013   5
  -1  21 -10-60.3484 39.0958   4
  -1  21 -10 38.8338 28.3497   1
   1 -21  11-31.0695 33.0253   5
  -1  21 -11 0.92173 26.5488   4
  -1  21 -12 12.0477 25.3695   4
   1 -21  12-20.2979 34.2862   5
  -1  21 -13 34.7037 35.6106   4
   1 -21  13 48.8964 21.3471   5
  -1  21 -14 95.5775 46.9069   4
   1 -21  14-41.9888 29.5661   5
  -1  21 -15 62.6132 38.0057   4
   1 -21  15-15.7184 19.8026   5
  -1  21 -16 5.79378 38.1526   4
   1 -21  16-40.0178 36.0972   5
   1 -21  17 76.3081 44.7385   5
  -1  21 -17-52.3789 38.9676   4
  -1  21 -18 0.24982 28.7004   4
   1 -21  18-79.3000 48.5578   5
  -1  21 -19 4.57228 23.4929   4
  -1  21 -20 15.0592 44.2513   4
  -1  21 -21 59.9263 50.7939   4
  -1  20   2-75.4344 40.5026   1
  -1  20   1 5.04246 28.0559   1
  -1  20   0 37.4827 31.4506   1
  -1  20  -1 64.8309 34.9290   1
  -1  20  -2 32.8382 26.3883   1
  -1  20  -3-16.0459 21.8439   1
  -1  20  -4 21.0753 24.5070   1
  -1  20  -5 75.0556 36.3342   1
  -1  20  -6 92.9911 36.4482   1
  -1  20  -7 107.768 39.0578   1
  -1  20  -8 50.2790 34.9135   4
   1 -20   8 14.9191 25.0464   5
  -1  20  -8 62.9325 29.2241   1
  -1  20  -9 26.3174 18.8165   1
   1 -20   9-25.2446 24.3337   5
  -1  20  -9 56.2252 37.2217   4
  -1  20 -10 16.6393 18.6729   1
  -1  20 -10-3.63363 22.9752   4
   1 -20  10 10.5372 24.5074   5
   1 -20  11 50.4014 25.1184   5
  -1  20 -11 52.6017 31.1468   4
  -1  20 -11 13.0440 17.5107   1
   1 -20  12 125.418 52.2464   5
  -1  20 -12 141.143 54.2392   4
  -1  20 -13-21.6078 27.4640   4
   1 -20  13-46.8277 41.1894   5
  -1  20 -14 37.3313 30.2142   4
   1 -20  14-22.1643 25.7653   5
   1 -20  15 140.112 54.5110   5
  -1  20 -15 66.2542 36.5794   4
  -1  20 -16 4.79372 31.0086   4
   1 -20  16 9.92502 26.0382   5
  -1  20 -17 160.431 54.7255   4
   1 -20  17 146.609 59.1742   5
   1 -20  18 37.1966 44.7240   5
  -1  20 -18-51.8575 37.4846   4
  -1  20 -19 78.8103 50.3036   4
   1 -20  19 78.6119 56.3506   5
  -1  20 -20-27.9310 31.2507   4
   1 -20  20 92.9541 55.2029   5
  -1  20 -21-84.2697 45.4371   4
  -1  19   4-46.7083 35.6507   1
  -1  19   3 49.0483 22.3087   1
  -1  19   2 11.3621 21.2905   1
  -1  19   1 32.2217 24.9404   1
  -1  19   0 72.0157 49.5296   1
  -1  19  -1-13.0624 21.0719   1
  -1  19  -2 2.50201 22.7674   1
  -1  19  -3 129.692 43.1096   1
  -1  19  -4-31.1790 23.0619   1
  -1  19  -5 16.0309 24.9139   1
  -1  19  -6 11.6754 20.9001   1
   1 -19   7-1.66763 21.4141   5
  -1  19  -7 53.6707 29.6807   1
  -1  19  -8-13.4729 14.9927   1
   1 -19   8-5.86554 27.3555   5
  -1  19  -8 6.78642 19.7665   2
  -1  19  -8 36.4318 28.0521   4
  -1  19  -9 127.740 36.7554   1
   1 -19   9 128.423 45.6379   5
  -1  19  -9 164.373 42.7099   2
  -1  19  -9 150.499 50.9426   4
  -1  19 -10 75.5088 31.4611   2
   1 -19  10-16.8065 32.7028   5
  -1  19 -10 117.881 35.5396   1
  -1  19 -10 56.4340 25.8627   4
  -1  19 -11 12.4058 13.7413   1
   1 -19  11-21.1123 38.4063   5
   1 -19  12 307.590 73.4810   5
  -1  19 -12 273.648 45.7559   1
  -1  19 -12 320.072 75.9326   4
   1 -19  13 8.64147 30.8573   5
  -1  19 -13-0.40956 21.1296   4
  -1  19 -14 87.1388 44.2050   4
   1 -19  14 4.59907 20.5801   5
   1 -19  15-0.44330 32.5827   5
  -1  19 -15-34.6162 30.7892   4
  -1  19 -16 1.51730 21.2611   4
   1 -19  16-46.2440 43.0376   5
  -1  19 -17 81.8202 47.9795   4
   1 -19  17 77.0670 37.1290   5
  -1  19 -18 15.1705 29.6565   4
   1 -19  18 0.23512 25.2011   5
  -1  19 -19 81.5543 45.1907   4
   1 -19  19 109.337 51.0994   5
  -1  19 -20 148.989 65.1957   4
   1 -19  20 30.5175 32.8344   5
   1 -19  21-33.6946 35.4910   5
  -1  19 -21 26.9456 25.2771   4
  -1  18   5 57.3377 38.7187   1
  -1  18   4-11.5266 22.5595   1
  -1  18   3 44.8119 22.8437   1
  -1  18   2-8.40101 22.7861   1
  -1  18   1 16.2503 21.5504   1
  -1  18   0-32.1183 28.4066   1
  -1  18  -1 81.7887 34.0400   1
  -1  18  -2-28.6148 28.9248   1
  -1  18  -3 99.5553 36.4616   1
  -1  18  -4 181.842 45.4197   1
  -1  18  -5 1037.46 107.929   1
   1 -18   6 56.4151 33.0413   5
  -1  18  -6 11.2776 18.2874   1
  -1  18  -7 526.531 73.4362   1
  -1  18  -7 332.143 57.2910   2
   1 -18   7 464.897 85.8863   5
  -1  18  -8 69.3370 24.8898   2
   1 -18   8 86.0215 40.3130   5
  -1  18  -8 64.8962 25.4782   1
  -1  18  -8 76.3846 44.4192   4
  -1  18  -9-17.9841 17.9892   1
  -1  18  -9 16.5179 14.1126   2
  -1  18  -9 12.6588 19.5198   4
   1 -18   9 0.97126 21.2232   5
   1 -18  10 39.5414 31.3668   5
  -1  18 -10 16.6765 14.1119   2
  -1  18 -10 24.1643 13.9496   1
  -1  18 -10 5.91463 22.4103   4
  -1  18 -11 92.0261 36.7784   4
   1 -18  11 85.4739 41.7396   5
  -1  18 -11 84.3744 27.8059   1
   1 -18  12-39.1314 40.8848   5
  -1  18 -12 21.2294 26.0371   4
  -1  18 -12 6.59138 10.2986   2
  -1  18 -12 18.9736 13.4580   1
  -1  18 -13 11.1658 26.4337   4
  -1  18 -13-21.9837 13.3804   1
   1 -18  13-39.8622 25.2403   5
  -1  18 -14 102.902 26.2631   2
  -1  18 -14 64.1211 41.2582   4
   1 -18  14 80.1292 40.1366   5
  -1  18 -15 31.1266 22.8667   4
   1 -18  15 85.8736 35.0751   5
  -1  18 -16-2.68586 23.3020   4
   1 -18  16 49.0433 37.0344   5
  -1  18 -17 0.63303 26.9341   4
   1 -18  17 8.81874 18.4514   5
  -1  18 -18 21.4280 30.7993   4
   1 -18  18 9.03190 27.0731   5
   1 -18  19-4.98858 29.9486   5
  -1  18 -19-46.3611 33.4918   4
  -1  18 -20 37.5398 34.1931   4
   1 -18  20 85.1448 41.9144   5
  -1  18 -21-11.1978 23.5785   4
   1 -18  21-22.6898 30.1863   5
   1 -18  22 34.4127 34.3468   5
   1 -18  23-81.3139 47.1049   5
  -1  17   7 20.6283 26.4054   1
  -1  17   6-32.3082 29.1037   1
  -1  17   5 43.0300 38.4554   1
  -1  17   4 96.8002 40.8058   1
  -1  17   3-2.23281 19.7445   1
  -1  17   2-51.2903 38.4065   1
  -1  17   1 6.14202 17.4307   1
  -1  17   0 44.6534 29.2650   1
  -1  17  -1-31.6231 29.8754   1
  -1  17  -2 45.3426 28.4113   1
  -1  17  -3 60.5698 26.1633   1
  -1  17  -4-9.01506 21.8881   1
  -1  17  -5 114.026 36.6566   2
  -1  17  -5-2.71099 21.5977   1
   1 -17   6 852.526 109.787   5
  -1  17  -6 691.647 78.2460   2
  -1  17  -6 701.550 80.1590   1
   1 -17   7 21.3964 27.1000   5
  -1  17  -7 21.2266 18.5262   1
  -1  17  -7 16.9273 12.3097   2
   1 -17   8 650.338 97.9762   5
  -1  17  -8 571.214 89.1112   4
  -1  17  -8 603.713 71.3293   1
  -1  17  -8 574.893 66.6970   2
  -1  17  -9 3.40432 23.6591   4
   1 -17   9-14.6486 16.4852   5
  -1  17  -9 4.86295 12.2786   1
   1 -17  10 94.3740 43.8482   5
  -1  17 -10 94.4501 42.0028   4
  -1  17 -10 128.187 32.8433   1
  -1  17 -11 284.077 41.7175   2
  -1  17 -11 278.821 43.8086   1
   1 -17  11 262.352 64.6376   5
  -1  17 -11 283.289 65.5335   4
  -1  17 -12 670.895 60.0776   1
  -1  17 -12 658.677 56.8414   2
   1 -17  12 661.391 99.3706   5
  -1  17 -12 667.840 99.1776   4
  -1  17 -13 20.2998 12.3012   2
  -1  17 -13 0.18176 19.6055   4
   1 -17  13 16.5427 26.2186   5
  -1  17 -14 49.4230 28.5177   4
  -1  17 -14 57.1890 15.9065   2
   1 -17  14 25.4797 27.5369   5
  -1  17 -14 7.13262 9.31466   2
  -1  17 -15 11.4384 18.8198   4
   1 -17  15 22.5152 21.3697   5
  -1  17 -15 18.4871 8.08994   2
   1 -17  16 23.0055 31.9182   5
  -1  17 -16-7.04881 25.6107   4
   1 -17  17 32.0168 22.0305   5
  -1  17 -17-16.0759 32.1421   4
  -1  17 -18 40.2538 42.0157   4
   1 -17  18 29.7624 35.4684   5
  -1  17 -19-49.3549 34.1683   4
   1 -17  19 86.9266 41.3027   5
   1 -17  20-5.93229 27.7711   5
  -1  17 -20 7.61589 24.2328   4
  -1  17 -21-30.7504 27.9357   4
   1 -17  21 2.50400 17.8056   5
  -1  17 -22-54.3884 35.2123   4
   1 -17  22-0.23651 28.7774   5
   1 -17  23 149.136 65.3610   5
   1 -17  24 0.25707 38.8510   5
  -1  16   8 20.9640 28.0310   1
  -1  16   7 124.313 54.1938   1
  -1  16   6 107.525 47.9934   1
  -1  16   5-11.0206 31.6886   1
  -1  16   4 17.3019 33.4216   1
  -1  16   3-25.3855 24.7875   1
  -1  16   2 195.271 57.0555   1
  -1  16   1 396.332 74.7138   1
  -1  16   0 506.424 76.3977   1
  -1  16  -1-20.8872 25.2929   1
  -1  16  -2 12.1572 16.2880   1
  -1  16  -3 94.5023 33.8109   1
  -1  16  -4 159.552 40.8426   1
  -1  16  -4 176.407 41.3268   2
   1 -16   5 410.353 72.8358   5
  -1  16  -5 499.709 67.2852   2
  -1  16  -5 528.902 68.3651   1
  -1  16  -6 108.294 32.8389   1
   1 -16   6 95.8240 40.1361   5
  -1  16  -6 107.110 29.7104   2
  -1  16  -7 476.354 59.5813   2
  -1  16  -7 370.566 55.8036   1
   1 -16   7 422.389 75.8188   5
  -1  16  -8 19.1798 16.9121   1
   1 -16   8 57.2577 34.5805   5
  -1  16  -8-0.15679 16.6180   4
  -1  16  -9 263.831 59.9424   4
   1 -16   9 263.835 56.9473   5
  -1  16  -9 179.588 35.5186   1
  -1  16 -10 148.432 29.6039   2
   1 -16  10 198.771 54.8760   5
  -1  16 -10 187.184 51.8494   4
  -1  16 -10 190.576 37.4331   1
  -1  16 -11 2.12986 17.2889   4
   1 -16  11-13.2335 26.7951   5
  -1  16 -11 29.7259 12.5783   2
  -1  16 -11 11.9761 12.0462   1
  -1  16 -12 148.316 27.3618   1
  -1  16 -12 204.395 30.5408   2
   1 -16  12 138.845 48.4630   5
  -1  16 -12 184.799 49.5457   4
   1 -16  13 94.6285 32.5122   5
  -1  16 -13 69.5831 23.6905   2
  -1  16 -13 98.3294 18.7960   2
  -1  16 -13 94.4479 42.7976   4
  -1  16 -14 106.035 40.6947   4
  -1  16 -14 100.836 16.6781   2
   1 -16  14 89.6526 40.2367   5
  -1  16 -14 73.1808 16.7005   2
  -1  16 -15 242.312 58.5232   4
   1 -16  15 233.139 58.6092   5
  -1  16 -16-10.7963 21.1810   4
   1 -16  16 8.46083 37.1532   5
  -1  16 -17 122.890 44.6623   4
   1 -16  17 126.298 47.1374   5
   1 -16  18 41.2369 27.5370   5
  -1  16 -18 23.4643 18.5487   4
   1 -16  19 322.907 78.6532   5
  -1  16 -19 229.510 61.0407   4
  -1  16 -20 30.3288 22.8985   4
   1 -16  20 24.5040 28.6464   5
   1 -16  21 122.922 46.8543   5
  -1  16 -21 77.8817 39.8764   4
  -1  16 -22 107.294 45.4228   4
   1 -16  22 57.9409 35.7051   5
   1 -16  23-17.9608 28.5419   5
   1 -16  24-76.8992 43.9698   5
   1 -16  25 40.7919 37.3187   5
  -1  15   9 32.2025 25.2686   1
  -1  15   8 35.4959 42.3069   1
  -1  15   7-41.8802 38.1587   1
  -1  15   6-4.97319 22.2070   1
  -1  15   5-53.7831 37.8266   1
  -1  15   4 184.806 55.4416   1
  -1  15   3 96.2737 40.4838   1
  -1  15   2 190.248 49.6945   1
  -1  15   1 182.243 46.2761   1
  -1  15   0 373.926 61.7891   1
  -1  15  -1 290.933 56.8710   1
  -1  15  -2 97.2439 30.1187   5
  -1  15  -2 99.8137 37.7977   2
  -1  15  -2 44.7785 25.6432   1
  -1  15  -3 53.3636 26.6914   2
  -1  15  -3 86.6555 29.9900   5
  -1  15  -3 44.7270 19.4131   1
  -1  15  -4 954.956 91.4213   2
  -1  15  -4 952.052 89.4050   1
  -1  15  -4 995.570 94.3891   5
   1 -15   4 1180.36 119.838   5
  -1  15  -5 54.6689 24.1640   2
   1 -15   5 119.855 38.5200   5
  -1  15  -5 131.978 32.8997   1
  -1  15  -6 270.589 46.0704   1
  -1  15  -6 210.030 39.8325   2
   1 -15   6 264.101 54.1807   5
  -1  15  -7 9.06760 14.7179   1
   1 -15   7-25.1194 25.0292   5
  -1  15  -8 57.2140 19.0741   1
  -1  15  -8 38.1701 18.7853   4
   1 -15   8 34.3066 23.6104   5
  -1  15  -9-2.59310 8.89492   2
  -1  15  -9 65.7307 22.0515   1
  -1  15  -9-2.21103 18.1408   4
   1 -15   9 53.9239 31.2673   5
  -1  15 -10 2722.70 113.641   2
  -1  15 -10 2814.09 122.874   1
  -1  15 -10 2740.47 183.034   4
   1 -15  10 3119.86 198.717   5
  -1  15 -11 15.3362 11.2577   1
   1 -15  11 8.66665 26.1051   5
  -1  15 -11 3.76162 6.82852   2
  -1  15 -11-5.98941 15.5099   4
   1 -15  12 418.540 72.9220   5
  -1  15 -12 472.418 40.3486   2
  -1  15 -12 575.839 85.9379   4
   1 -15  13 15.4130 17.0219   5
  -1  15 -13 15.0769 19.4087   4
  -1  15 -13 34.9716 9.98249   2
  -1  15 -13 34.9376 14.9872   2
  -1  15 -14 52.9537 10.4731   2
  -1  15 -14 6.35709 26.9982   4
   1 -15  15 293.868 65.1979   5
  -1  15 -15 201.079 57.0630   4
  -1  15 -16 32.7844 33.3137   4
   1 -15  16 21.0386 21.3468   5
  -1  15 -17 269.457 66.2113   4
   1 -15  17 378.072 78.3759   5
  -1  15 -18 137.709 51.1536   4
   1 -15  18 50.8554 39.1753   5
   1 -15  19 26.5077 21.4415   5
  -1  15 -19-2.41649 23.4979   4
  -1  15 -20 102.483 39.9556   4
   1 -15  20 107.843 48.0704   5
  -1  15 -21 55.8055 37.0785   4
   1 -15  21 40.1680 30.1612   5
  -1  15 -22-2.58253 30.2016   4
   1 -15  22-32.9412 34.1328   5
   1 -15  23 34.1855 35.2069   5
   1 -15  24 49.4865 44.5782   5
   1 -15  25-0.24484 36.2051   5
  -1  14  10-33.4935 29.0397   1
  -1  14   9-18.4366 20.1427   1
  -1  14   8 28.2263 26.3820   1
  -1  14   7-51.2445 44.6955   1
  -1  14   6 35.9168 26.4797   1
  -1  14   5 397.231 76.6149   1
  -1  14   4 286.077 62.5045   1
  -1  14   3 616.630 86.4981   1
  -1  14   2 443.690 56.5517   5
  -1  14   2 420.377 67.8334   1
  -1  14   1 55.2958 24.1526   1
  -1  14   1 79.6377 23.9568   5
  -1  14   0 15.7732 16.3038   5
  -1  14   0-20.3060 23.5386   1
  -1  14  -1 149.464 37.2551   1
  -1  14  -1 138.231 33.9444   5
  -1  14  -1 101.662 33.4010   2
  -1  14  -2 3.31621 11.7877   5
  -1  14  -2 17.4542 15.3808   1
  -1  14  -2 28.5574 22.8416   2
  -1  14  -3 1867.11 123.064   5
  -1  14  -3 2107.56 130.331   1
  -1  14  -3 1775.41 122.579   2
   1 -14   4 575.731 83.3863   5
  -1  14  -4 510.766 63.4507   2
  -1  14  -4 554.143 69.3898   5
  -1  14  -4 621.935 67.9875   1
   1 -14   5 3468.93 195.938   5
  -1  14  -5 3247.29 148.961   1
  -1  14  -5 3713.79 177.357   5
  -1  14  -6 1457.25 96.5221   1
   1 -14   6 1360.31 123.886   5
  -1  14  -6 1492.57 114.280   5
  -1  14  -7 670.537 62.6491   2
  -1  14  -7 613.846 60.8779   1
  -1  14  -7 804.981 85.4484   5
   1 -14   7 635.616 84.8460   5
  -1  14  -8 247.320 53.0271   4
  -1  14  -8 257.415 39.9732   1
  -1  14  -8 169.254 30.3493   2
   1 -14   8 237.191 52.7373   5
  -1  14  -9 179.141 52.5401   4
  -1  14  -9 182.859 29.7317   2
  -1  14  -9 187.875 38.5914   1
   1 -14   9 192.781 47.5464   5
  -1  14 -10 120.890 23.5256   2
  -1  14 -10 101.908 37.8274   4
   1 -14  10 166.102 43.0253   5
  -1  14 -10 92.4816 22.3916   1
   1 -14  11 502.918 77.4346   5
  -1  14 -11 368.864 69.4460   4
  -1  14 -11 476.940 40.0400   2
  -1  14 -11 470.266 40.3093   1
  -1  14 -12 106.443 24.9513   2
  -1  14 -12 48.0512 24.3251   4
  -1  14 -12 76.3747 14.6309   2
   1 -14  12 39.4122 25.9191   5
  -1  14 -13 254.256 26.6794   2
  -1  14 -13 250.644 53.5840   4
  -1  14 -13 234.537 20.8638   2
   1 -14  13 276.741 57.6597   5
  -1  14 -14 330.319 64.0661   4
   1 -14  14 319.509 66.3944   5
  -1  14 -15 75.1104 37.3555   4
   1 -14  15 98.0372 33.8128   5
  -1  14 -16 80.0201 38.3232   4
   1 -14  16 142.515 44.6834   5
   1 -14  17 33.2934 33.0258   5
  -1  14 -17-24.4720 19.0712   4
  -1  14 -18 93.8964 37.3696   4
   1 -14  18 101.913 47.5855   5
   1 -14  19 20.0038 26.4111   5
  -1  14 -19-7.33334 15.0263   4
  -1  14 -20 39.6955 30.6218   4
   1 -14  20 26.9202 28.5057   5
  -1  14 -21 45.1073 29.4313   4
   1 -14  21-16.6370 34.4927   5
  -1  14 -22 214.160 55.8244   4
   1 -14  22 253.124 65.4537   5
   1 -14  23-51.5697 35.1937   5
   1 -14  24 6.23131 26.8115   5
   1 -14  25-27.5697 31.6972   5
  -1  13  11 19.0863 39.1748   1
  -1  13  10 23.2977 26.2207   1
  -1  13   9 139.106 52.8837   1
  -1  13   8-28.8773 40.1541   1
  -1  13   7-3.96210 31.4336   1
  -1  13   6 112.822 45.6263   1
  -1  13   5 28.7820 30.8984   1
  -1  13   4 37.1299 25.8626   1
  -1  13   4 15.4651 13.3842   5
  -1  13   3 451.140 53.8622   5
  -1  13   3 438.727 75.4367   1
  -1  13   2 239.561 39.8722   5
  -1  13   2 167.543 42.8823   1
  -1  13   1 79.3973 32.5432   1
  -1  13   1 11.3126 14.0932   5
  -1  13   0 175.526 36.2745   5
  -1  13   0 132.709 38.4400   1
  -1  13   0 179.167 43.9074   2
  -1  13  -1 19.5252 20.2340   1
  -1  13  -1 9.26163 19.1476   2
  -1  13  -1 17.5787 17.1321   5
  -1  13  -2 29.1609 17.8987   2
  -1  13  -2 34.2065 19.2628   5
  -1  13  -2 57.4318 24.5481   1
  -1  13  -3 11.2168 9.31468   2
  -1  13  -3 11.5608 15.7935   1
  -1  13  -3 32.4305 17.8539   5
   1 -13   3 43.9190 25.4088   5
  -1  13  -4 233.316 39.6051   1
  -1  13  -4 226.560 42.4288   5
   1 -13   4 139.462 40.0223   5
  -1  13  -5 172.617 33.5020   1
   1 -13   5 149.980 41.2890   5
  -1  13  -5 209.800 42.2627   5
   1 -13   6 809.782 91.0068   5
  -1  13  -6 930.766 86.8131   5
  -1  13  -6 750.114 64.9686   2
  -1  13  -6 799.821 66.4357   1
  -1  13  -7 259.094 50.7706   4
  -1  13  -7 247.309 37.2794   1
  -1  13  -7 303.973 39.4658   2
   1 -13   7 276.869 54.9247   5
  -1  13  -7 275.095 46.8789   5
  -1  13  -8 222.005 33.0211   2
  -1  13  -8 193.506 33.3931   1
  -1  13  -8 227.222 44.0443   5
   1 -13   8 186.881 44.7985   5
  -1  13  -8 227.385 48.6197   4
  -1  13  -9 175.420 29.4247   1
  -1  13  -9 212.935 29.9041   2
  -1  13  -9 160.686 46.3643   4
   1 -13   9 161.919 42.4433   5
  -1  13 -10 540.553 77.2786   4
  -1  13 -10 490.692 40.8780   1
  -1  13 -10 467.601 39.7227   2
   1 -13  10 600.100 79.7557   5
   1 -13  11 267.518 55.8503   5
  -1  13 -11 184.032 22.7987   2
  -1  13 -11 264.193 54.3384   4
  -1  13 -12 3.49362 8.87084   2
   1 -13  12-12.8491 16.6790   5
  -1  13 -12 12.6395 7.96262   2
  -1  13 -12 2.10821 14.5649   4
  -1  13 -13 57.8240 31.5531   4
  -1  13 -13 49.3544 7.49830   2
   1 -13  13 72.4786 30.2880   5
  -1  13 -13 42.5963 8.01711   2
  -1  13 -14 585.252 84.9502   4
   1 -13  14 728.545 94.5334   5
   1 -13  15 300.657 60.7135   5
  -1  13 -15 352.237 73.2941   4
  -1  13 -16 61.7825 28.5376   4
   1 -13  16 53.7830 32.5595   5
  -1  13 -17 506.240 81.4559   4
   1 -13  17 416.268 74.5757   5
  -1  13 -18 18.0793 28.3996   4
   1 -13  18 19.1494 21.7373   5
   1 -13  19 149.428 47.3743   5
  -1  13 -19 161.554 50.0469   4
  -1  13 -20 82.2834 38.8011   4
   1 -13  20 128.398 43.2598   5
  -1  13 -21 137.324 42.5023   4
   1 -13  21 70.5154 33.5943   5
   1 -13  22 41.1084 29.9352   5
  -1  13 -22 30.3852 15.6596   4
   1 -13  23 28.0693 32.6081   5
   1 -13  24-18.8744 25.8962   5
   1 -13  25-71.8823 60.7784   3
   1 -13  25 67.1877 39.6387   5
  -1  12  13 83.1488 39.3609   1
  -1  12  12 45.7948 40.7151   1
  -1  12  11 13.8484 24.3009   1
  -1  12  10 112.884 49.9681   1
  -1  12   9 69.5946 41.8640   1
  -1  12   8 7.73595 24.4417   1
  -1  12   7 17.9111 37.0912   1
  -1  12   6 57.0733 17.7706   5
  -1  12   6 72.0273 38.6910   1
  -1  12   5 0.65874 8.59651   5
  -1  12   5-5.12016 27.3000   1
  -1  12   4 27.7747 20.9121   1
  -1  12   4 56.5032 18.8665   5
  -1  12   3 199.122 35.7490   5
  -1  12   3 176.542 45.0851   1
  -1  12   2 1384.62 114.680   1
  -1  12   2 1301.88 115.863   2
  -1  12   2 1296.53 89.7518   5
  -1  12   1 159.528 41.2503   2
  -1  12   1 102.776 25.3268   5
  -1  12   1 136.739 35.5161   1
  -1  12   0 151.796 32.2693   5
  -1  12   0 138.907 38.4836   2
  -1  12   0 132.988 33.8626   1
  -1  12  -1 253.091 45.0987   1
  -1  12  -1 208.176 37.8143   5
  -1  12  -1 224.228 43.9136   2
  -1  12  -2 594.603 63.2603   5
  -1  12  -2 606.949 67.5803   1
  -1  12  -2 617.680 67.0146   2
  -1  12  -3 627.851 63.2884   1
  -1  12  -3 668.097 69.1405   5
   1 -12   3 699.810 79.9635   5
  -1  12  -4 2444.44 132.677   5
  -1  12  -4 2372.39 116.461   1
   1 -12   4 2790.34 159.283   5
  -1  12  -5 936.587 83.0911   5
  -1  12  -5 819.538 67.2186   2
   1 -12   5 928.890 94.2232   5
  -1  12  -5 845.179 66.8905   1
  -1  12  -6 86.4381 20.8168   2
  -1  12  -6 92.0142 21.5072   1
  -1  12  -6 87.9805 27.6597   5
   1 -12   6 62.0463 26.9468   5
  -1  12  -7 314.135 50.7237   5
  -1  12  -7 240.006 31.5858   2
   1 -12   7 233.925 46.4439   5
  -1  12  -7 296.160 37.3713   1
  -1  12  -7 239.671 47.9620   4
  -1  12  -8 650.359 78.6404   4
  -1  12  -8 622.069 47.6517   2
   1 -12   8 609.759 77.5603   5
  -1  12  -8 585.172 48.4801   1
  -1  12  -8 646.962 72.5193   5
  -1  12  -9 1006.26 56.5366   2
  -1  12  -9 964.546 97.7248   4
  -1  12  -9 971.369 58.1521   1
   1 -12   9 1127.58 104.969   5
  -1  12  -9 1197.96 99.5717   5
  -1  12 -10 979.863 99.7635   4
  -1  12 -10 1009.46 48.7738   1
   1 -12  10 1107.84 109.323   5
  -1  12 -10 1020.34 51.1217   2
  -1  12 -11 784.213 92.1753   4
  -1  12 -11 834.243 52.5047   2
   1 -12  11 872.543 94.3739   5
  -1  12 -11 829.138 40.2802   2
  -1  12 -12 2272.32 157.388   4
   1 -12  12 2142.14 148.011   5
  -1  12 -12 2177.18 51.5589   2
  -1  12 -12 2083.85 59.7785   2
   1 -12  13-28.7090 25.7198   5
  -1  12 -13 14.9123 27.5897   4
  -1  12 -14 13.3574 17.2752   4
   1 -12  14 4.37416 17.0243   5
   1 -12  15 352.775 64.0283   5
  -1  12 -15 328.561 65.3284   4
  -1  12 -16 132.506 40.4843   4
   1 -12  16 199.552 50.2716   5
   1 -12  17 1092.03 114.914   5
  -1  12 -17 1078.00 114.695   4
  -1  12 -18 76.3209 36.5055   4
   1 -12  18 18.3750 26.7160   5
  -1  12 -19 414.978 72.8127   4
   1 -12  19 442.476 76.5992   5
  -1  12 -20 39.7515 32.6628   4
   1 -12  20 62.6728 33.8399   5
   1 -12  21 55.0856 34.1930   5
  -1  12 -21 69.2952 34.6134   4
  -1  12 -22 80.6549 34.3111   4
   1 -12  22 86.3210 36.5935   5
   1 -12  23 140.325 48.5101   5
   1 -12  24-58.3438 35.1144   5
   1 -12  24-30.9730 44.2708   3
   1 -12  25 35.0997 48.0177   3
  -1  11  14 277.631 78.1204   1
  -1  11  13 5.90038 25.6931   1
  -1  11  12 2.95186 24.1420   1
  -1  11  11-45.7267 40.2403   1
  -1  11  10 34.5235 24.0470   1
  -1  11   9 22.5309 29.4816   1
  -1  11   8 6.50794 24.8248   1
  -1  11   7 5.35168 10.6821   5
  -1  11   7-21.2073 30.7563   1
  -1  11   6 360.274 62.6601   1
  -1  11   6 326.448 39.5911   5
  -1  11   5 73.5167 19.6254   5
  -1  11   5 164.615 43.0253   1
  -1  11   4 8.33653 23.4596   1
  -1  11   4 18.5686 11.3627   5
  -1  11   3 155.230 38.5603   1
  -1  11   3 95.9629 36.3876   2
  -1  11   3 94.0821 22.1983   5
  -1  11   2 1088.69 78.6399   5
  -1  11   2 1188.54 105.717   2
  -1  11   2 1176.11 99.0412   1
  -1  11   1 16.7449 22.2223   2
  -1  11   1 31.3291 23.8491   1
  -1  11   1-1.86676 10.0976   5
  -1  11   0 490.942 61.6482   1
  -1  11   0 364.445 54.0247   2
  -1  11   0 492.307 54.3732   5
  -1  11  -1 269.677 44.0994   1
  -1  11  -1 227.827 36.6038   5
  -1  11  -2-10.9970 12.4223   1
  -1  11  -2 18.2211 12.8588   5
  -1  11  -3 1166.43 88.1030   5
  -1  11  -3 1139.71 81.3436   2
  -1  11  -3 1216.97 82.4652   1
  -1  11  -4 5308.41 162.173   1
   1 -11   4 5616.95 216.539   5
  -1  11  -4 5324.11 188.748   5
  -1  11  -4 5118.61 164.928   2
  -1  11  -5 2024.56 97.2574   2
  -1  11  -5 2202.58 123.131   5
   1 -11   5 2072.98 133.696   5
  -1  11  -5 2070.13 95.6176   1
  -1  11  -6 307.559 47.2881   5
  -1  11  -6 237.825 31.9411   2
  -1  11  -6 248.726 31.4355   1
  -1  11  -6 242.951 47.0377   4
  -1  11  -7 3667.58 113.201   2
  -1  11  -7 3677.75 114.718   1
  -1  11  -7 3781.21 179.926   4
  -1  11  -7 3855.59 167.098   5
  -1  11  -8 2.57388 8.96480   2
  -1  11  -8-1.31537 8.22721   1
  -1  11  -8 5.76886 17.4639   4
  -1  11  -8 2.08461 12.3016   5
  -1  11  -9 397.048 31.3078   1
  -1  11  -9 418.817 31.7695   2
  -1  11  -9 410.635 62.2338   4
  -1  11  -9 397.391 56.0762   5
  -1  11 -10 345.314 25.4331   2
  -1  11 -10 361.009 33.8005   2
   1 -11  10 420.340 63.7150   5
  -1  11 -10 341.425 61.1385   4
   1 -11  11 123.684 37.9284   5
  -1  11 -11 125.425 15.2624   2
  -1  11 -11 118.907 34.6997   4
  -1  11 -11 116.564 11.9781   2
   1 -11  12 231.760 48.7030   5
  -1  11 -12 230.356 50.9270   4
   1 -11  13 842.704 90.9157   5
  -1  11 -13 685.089 86.5325   4
   1 -11  14 345.167 61.1139   5
  -1  11 -14 371.668 65.0077   4
   1 -11  15 508.756 74.5085   5
  -1  11 -15 549.581 80.9666   4
   1 -11  16 257.818 55.4340   5
  -1  11 -16 202.331 48.4289   4
  -1  11 -17 589.088 82.7451   4
   1 -11  17 539.500 78.5886   5
   1 -11  18 40.4550 26.5845   5
  -1  11 -18 3.30082 16.8686   4
   1 -11  19-7.85123 20.8455   5
  -1  11 -19 12.7338 17.3336   4
   1 -11  20-19.8960 24.6990   5
  -1  11 -20 28.3965 27.3417   4
   1 -11  21 45.4522 30.5680   5
  -1  11 -21 46.2334 26.0455   4
   1 -11  22 36.3970 29.9038   5
  -1  11 -22 39.5429 25.1442   4
   1 -11  23-76.6509 37.2713   5
   1 -11  23 77.4385 64.2980   3
   1 -11  24 114.099 48.9888   5
   1 -11  24 45.6349 46.8575   3
   1 -11  25 64.3235 68.7688   3
  -1  10  15 30.0696 23.7317   1
  -1  10  14-10.8065 36.2695   1
  -1  10  13 50.6691 36.2462   1
  -1  10  12 35.7186 35.0356   1
  -1  10  11 47.3133 39.4376   1
  -1  10  10-34.2900 32.8155   1
  -1  10   9 110.627 38.5209   1
  -1  10   8 567.810 83.6983   1
  -1  10   8 440.316 41.4196   5
  -1  10   7 569.343 47.8425   5
  -1  10   7 501.913 75.3187   1
  -1  10   6 24.5273 25.4688   1
  -1  10   6 27.9499 16.0614   5
  -1  10   5 195.119 29.6588   5
  -1  10   5 219.308 48.5360   1
  -1  10   4 363.534 42.5071   5
  -1  10   4 368.385 57.3273   1
  -1  10   4 345.973 60.4062   2
  -1  10   3 426.254 47.1136   5
  -1  10   3 501.800 69.1002   2
  -1  10   3 544.921 66.7930   1
  -1  10   2 2241.11 136.637   2
  -1  10   2 2120.19 126.860   1
  -1  10   2 2121.54 106.154   5
  -1  10   1 56.0190 17.2496   5
  -1  10   1 28.4187 18.9618   2
  -1  10   1 31.3774 20.3368   1
  -1  10   0 694.523 63.0754   5
  -1  10   0 645.677 64.1531   1
  -1  10  -1 287.868 42.4659   1
  -1  10  -1 301.009 42.0923   5
  -1  10  -2 659.498 59.3464   1
  -1  10  -2 680.299 63.2968   5
  -1  10  -2 665.300 61.7716   2
  -1  10  -3-0.29673 11.8803   1
  -1  10  -3 2.41143 10.7023   2
  -1  10  -3 8.72069 9.16966   5
  -1  10  -4 23.0406 13.3663   1
  -1  10  -4 35.4433 18.3807   5
  -1  10  -4 6.99516 11.5422   2
  -1  10  -5 6214.85 151.527   1
  -1  10  -5 5783.41 150.465   2
  -1  10  -5 6073.82 196.186   5
  -1  10  -6 230.989 40.0166   5
  -1  10  -6 289.865 31.8734   2
  -1  10  -6 259.782 30.3138   1
  -1  10  -7 472.840 56.8775   5
  -1  10  -7 389.869 33.0681   2
  -1  10  -7 372.267 32.2651   1
  -1  10  -8 11.9138 12.6034   5
  -1  10  -8-3.84895 4.84599   2
  -1  10  -8-8.41678 6.77256   1
  -1  10  -9 805.475 76.2896   5
  -1  10  -9 695.073 34.6000   2
   1 -10  10 42.9818 26.7476   5
  -1  10 -10 31.1191 8.50199   2
  -1  10 -10 20.5443 5.32384   2
   1 -10  11 159.924 37.1628   5
   1 -10  12 98.5513 35.4614   5
   1 -10  13 544.128 70.3364   5
  -1  10 -14-11.2032 22.0065   4
   1 -10  14-2.87876 15.6808   5
   1 -10  15 188.427 46.6419   5
  -1  10 -15 124.616 38.3470   4
  -1  10 -16 42.4587 29.2445   4
   1 -10  16-1.74718 13.8642   4
   1 -10  16 27.8670 22.9179   5
   1 -10  17-1.92941 16.6990   4
   1 -10  17 31.9857 28.8413   5
  -1  10 -17 18.3128 15.1497   4
  -1  10 -18 210.065 48.6316   4
   1 -10  18 230.904 45.3932   4
   1 -10  18 255.368 55.8997   5
  -1  10 -19 436.922 69.8401   4
   1 -10  19 345.784 60.3805   4
   1 -10  19 285.277 57.1399   5
   1 -10  20-17.9817 22.4230   5
  -1  10 -20-23.3721 22.3101   4
   1 -10  21-17.2094 24.9925   5
  -1  10 -21-6.87561 21.5742   4
   1 -10  22-22.1545 35.4926   3
   1 -10  22 15.5926 20.5635   5
   1 -10  23-44.2408 45.5601   3
   1 -10  23 8.95668 24.9884   5
   1 -10  24 0.35040 44.2621   3
   1 -10  25-40.6940 44.8448   3
  -1   9  16 64.3852 45.2997   1
  -1   9  15-0.22088 22.2568   1
  -1   9  14 49.6805 48.1732   1
  -1   9  13 6.11767 23.7110   1
  -1   9  12 346.479 74.9545   1
  -1   9  11 48.7395 35.1518   1
  -1   9  10 119.979 41.7531   1
  -1   9   9 145.188 20.7162   5
  -1   9   9 106.110 42.9590   1
  -1   9   8 8.98863 6.25396   5
  -1   9   8-8.69232 25.2312   1
  -1   9   7 970.054 100.118   1
  -1   9   7 922.748 60.2258   5
  -1   9   6 1085.46 101.565   1
  -1   9   6 879.249 60.1793   5
  -1   9   5 719.386 82.2695   1
  -1   9   5 593.874 50.2597   5
  -1   9   5 641.633 79.8681   2
  -1   9   4 647.581 77.6608   2
  -1   9   4 519.526 48.5467   5
  -1   9   4 561.565 68.4031   1
  -1   9   3 149.202 27.5958   5
  -1   9   3 138.101 34.8123   1
  -1   9   3 153.548 38.2812   2
  -1   9   2 293.935 47.1158   2
  -1   9   2 297.011 39.1401   5
  -1   9   2 303.854 46.2567   1
  -1   9   1 1059.33 80.3916   1
  -1   9   1 1001.37 70.0739   5
  -1   9   0 1.02261 15.7948   1
  -1   9   0 5.02041 9.48246   5
  -1   9  -1 336.337 43.6364   2
  -1   9  -1 357.403 44.1778   5
  -1   9  -1 385.003 44.7046   1
  -1   9  -2 461.644 47.7285   2
  -1   9  -2 421.770 49.1619   5
  -1   9  -2 443.888 44.9801   1
   1  -9   2 516.712 60.9462   5
  -1   9  -3-18.1773 14.9753   5
  -1   9  -3-0.98562 9.93148   1
  -1   9  -3 5.00332 9.71911   2
  -1   9  -4 13.4555 10.8017   2
  -1   9  -4 14.0379 7.98845   5
  -1   9  -4-0.21511 10.9957   1
  -1   9  -5 323.837 44.3801   5
  -1   9  -5 326.899 32.8077   1
  -1   9  -5 284.976 31.3528   2
  -1   9  -6 1132.83 81.8699   5
  -1   9  -6 1008.29 51.6204   2
  -1   9  -6 1015.79 49.9817   1
  -1   9  -7 52.9953 12.2571   1
  -1   9  -7 50.7129 10.6334   2
  -1   9  -7 48.4476 18.1386   5
  -1   9  -8 306.059 45.2846   5
  -1   9  -8 281.281 21.1661   2
  -1   9  -9 1937.72 113.713   5
  -1   9  -9 1962.01 44.3715   2
  -1   9  -9 1915.40 55.3323   2
   1  -9  10 1665.71 113.979   5
   1  -9  11 21.9495 18.8080   5
   1  -9  12 716.103 77.4192   5
   1  -9  12 655.228 69.1924   4
   1  -9  13 66.7241 22.9924   5
   1  -9  13 83.6693 27.9043   4
   1  -9  14 115.593 31.4035   4
   1  -9  14 202.420 45.5636   5
   1  -9  15 301.705 50.5934   4
   1  -9  15 344.627 57.6198   5
   1  -9  16 15.2090 8.77411   1
  -1   9 -16 3.11036 15.7710   4
   1  -9  16 21.7954 17.1353   5
   1  -9  16 23.8237 9.05801   1
   1  -9  16 4.93571 14.7433   4
   1  -9  17 94.6477 15.5330   1
   1  -9  17 97.4634 33.9970   5
  -1   9 -17 80.0768 33.2213   4
   1  -9  17 96.3255 29.0432   4
   1  -9  18 219.166 52.3556   5
   1  -9  18 247.870 27.1251   1
   1  -9  18 311.847 57.2189   4
  -1   9 -18 237.209 50.0369   4
   1  -9  19 173.704 45.0423   5
  -1   9 -19 117.631 38.2273   4
   1  -9  19 106.352 19.5102   1
   1  -9  19 147.403 38.7894   4
   1  -9  20 42.4940 25.3838   5
  -1   9 -20 23.4874 20.4059   4
   1  -9  21-110.659 57.2843   3
   1  -9  21-1.34990 16.1113   5
   1  -9  22-1.89539 20.7200   5
   1  -9  22-16.7952 32.0305   3
   1  -9  23-0.32879 46.2217   3
   1  -9  23 16.2496 26.1870   5
   1  -9  24-69.2066 52.2611   3
   1  -9  25 8.09273 63.2818   3
  -1   8  17 15.1670 35.1557   1
  -1   8  16-42.5511 41.8831   1
  -1   8  15 105.249 42.6232   1
  -1   8  14-6.98604 23.9268   1
  -1   8  13 25.5096 38.8097   1
  -1   8  12 169.258 51.3234   1
  -1   8  11 192.145 54.9795   1
  -1   8  10 363.756 69.2819   1
  -1   8  10 393.434 29.0845   5
  -1   8   9 75.1314 15.7730   5
  -1   8   9 1.72732 20.1168   1
  -1   8   8 188.461 48.1857   1
  -1   8   8 217.071 27.4688   5
  -1   8   7 47.4014 14.8553   5
  -1   8   7 37.3048 25.4271   1
  -1   8   6 631.176 79.7586   2
  -1   8   6 633.423 50.3552   5
  -1   8   6 729.821 80.5467   1
  -1   8   5 263.980 48.8245   2
  -1   8   5 194.439 28.6862   5
  -1   8   5 226.317 48.8293   1
  -1   8   4 621.673 50.7518   5
  -1   8   4 753.439 75.3021   1
  -1   8   3 67.0918 26.1535   1
  -1   8   3 52.2463 15.7822   5
  -1   8   2 1799.16 105.550   1
  -1   8   2 1728.34 87.2352   5
  -1   8   1 1159.35 84.1909   2
  -1   8   1 1124.72 78.9143   1
  -1   8   1 1064.85 69.8607   5
  -1   8   0 2969.53 118.208   5
  -1   8   0 3226.15 126.067   1
  -1   8   0 2890.51 126.931   2
  -1   8  -1 7.77442 15.8068   5
  -1   8  -1 3.46273 11.9572   2
  -1   8  -1-1.91349 13.8015   1
  -1   8  -2 774.604 55.3080   1
   1  -8   2 696.073 67.4799   5
  -1   8  -2 740.249 56.4176   2
  -1   8  -2 768.005 61.5095   5
  -1   8  -3 2831.59 96.8085   1
   1  -8   3 2839.10 132.492   5
  -1   8  -3 2638.82 116.580   5
  -1   8  -3 2746.64 98.9558   2
  -1   8  -4 1225.92 80.5960   5
  -1   8  -4 1285.74 62.8993   2
  -1   8  -4 1465.20 64.8935   1
  -1   8  -5 2582.44 118.569   5
  -1   8  -5 2610.42 130.240   4
  -1   8  -5 2577.83 79.4025   2
  -1   8  -5 2655.01 76.7342   1
  -1   8  -6 102.803 25.2626   5
  -1   8  -6 85.7680 13.7551   1
  -1   8  -6 79.1511 13.9168   2
  -1   8  -6 113.793 31.6662   4
  -1   8  -7 1423.78 44.0766   2
  -1   8  -7 1479.09 102.380   4
  -1   8  -7 1488.87 92.6192   5
  -1   8  -8 2212.79 113.352   5
  -1   8  -8 2303.29 130.254   4
  -1   8  -9 1095.61 82.3269   5
  -1   8  -9 1163.52 94.3382   4
  -1   8 -10 7333.41 242.287   4
   1  -8  10 6959.47 217.398   4
   1  -8  10 7222.58 224.586   5
   1  -8  11 993.285 85.8111   5
   1  -8  11 833.372 77.3258   4
   1  -8  12 1511.54 106.332   5
   1  -8  12 1473.32 104.615   4
   1  -8  13 56.2000 26.0049   4
   1  -8  13 17.8713 4.48212   1
   1  -8  13 27.6939 18.8099   5
   1  -8  14 879.474 38.9965   1
   1  -8  14 941.660 88.0229   4
   1  -8  14 954.916 89.0647   5
   1  -8  15 603.636 72.7188   5
   1  -8  15 594.915 56.0450   2
   1  -8  15 659.317 39.4546   1
   1  -8  15 631.451 73.0225   4
   1  -8  16 105.157 31.4124   5
   1  -8  16 184.955 24.6477   1
   1  -8  16 144.613 37.1082   4
   1  -8  16 134.294 30.9316   2
   1  -8  17 1094.32 102.481   4
   1  -8  17 938.857 57.1136   1
   1  -8  17 1008.44 98.4090   5
   1  -8  17 956.629 80.1044   2
  -1   8 -17 961.387 97.4698   4
   1  -8  18 150.059 40.9477   5
   1  -8  18 147.414 38.0178   4
  -1   8 -18 193.628 43.6227   4
   1  -8  18 136.732 24.9861   1
   1  -8  18 165.080 35.9819   2
   1  -8  19 45.6068 15.9877   1
   1  -8  19 5.86560 13.3736   5
   1  -8  19 23.1580 24.2465   4
   1  -8  20 1.25596 11.1699   1
   1  -8  20-16.7929 45.8489   3
   1  -8  20 9.96196 14.2603   5
   1  -8  21 80.0198 32.8604   5
   1  -8  21 1.16360 25.6720   3
   1  -8  22-38.6255 26.1481   5
   1  -8  22-42.5965 34.0683   3
   1  -8  23-1.30991 26.6749   3
   1  -8  24 45.4735 40.9023   3
  -1   7  18-26.2213 40.2217   1
  -1   7  17 27.6343 39.3434   1
  -1   7  16 31.6118 33.3692   1
  -1   7  15-2.61315 21.7002   1
  -1   7  14 146.943 54.5580   1
  -1   7  13 12.3709 24.1777   1
  -1   7  12 55.1781 32.9526   1
  -1   7  11 57.2454 9.77109   5
  -1   7  11 50.3786 31.4895   1
  -1   7  10 314.440 61.8805   1
  -1   7  10 257.621 24.5477   5
  -1   7   9 871.695 95.2277   1
  -1   7   9 860.374 49.6222   5
  -1   7   8 65.8549 15.2042   5
  -1   7   8 37.4683 24.2077   2
   1  -7  -8 61.1746 37.9523   3
  -1   7   8 57.3273 24.2150   1
  -1   7   7 81.2076 18.3733   5
  -1   7   7 83.5595 29.1200   2
  -1   7   7 80.9050 32.4816   1
  -1   7   6 57.9493 31.8087   1
  -1   7   6 29.6554 11.6113   5
  -1   7   5 96.2201 28.3181   1
  -1   7   5 92.9794 19.0541   5
  -1   7   4 1029.71 63.5994   5
  -1   7   4 1099.29 89.0245   1
  -1   7   3 777.195 71.6437   1
  -1   7   3 721.279 54.1961   5
  -1   7   2 720.260 54.4111   5
  -1   7   2 739.159 65.3276   1
  -1   7   1 1186.52 78.3939   1
  -1   7   1 1147.71 79.0771   2
  -1   7   1 1080.38 68.4807   5
  -1   7   0 2032.95 99.3194   2
  -1   7   0 2157.93 97.7808   1
  -1   7   0 2006.21 92.9777   5
  -1   7  -1 6572.06 168.779   5
  -1   7  -1 6608.80 163.725   2
  -1   7  -1 6943.43 164.460   1
  -1   7  -2 3414.97 109.703   2
  -1   7  -2 3694.27 127.972   5
   1  -7   2 3728.89 144.660   5
  -1   7  -2 3461.98 107.401   1
  -1   7  -3 228.205 27.8723   2
  -1   7  -3 220.859 25.2500   1
  -1   7  -3 258.350 33.6258   5
   1  -7   3 260.715 41.4906   5
  -1   7  -4 641.776 55.4816   5
  -1   7  -4 619.183 37.0322   1
  -1   7  -4 614.560 37.6255   2
  -1   7  -5 2479.12 65.6554   2
  -1   7  -5 2554.10 122.481   4
  -1   7  -5 2432.32 62.4921   1
  -1   7  -5 2513.30 110.403   5
  -1   7  -6 698.847 67.2812   4
  -1   7  -6 704.573 28.8502   2
  -1   7  -6 671.899 57.9208   5
  -1   7  -7 1026.19 83.6760   4
  -1   7  -7 916.037 69.7962   5
   1  -7   8 3471.05 143.773   4
  -1   7  -8 3613.05 158.077   4
   1  -7   8 3610.15 146.626   5
  -1   7  -8 3498.00 138.033   5
   1  -7   9 614.610 63.0448   4
   1  -7   9 624.871 63.3764   5
  -1   7  -9 560.708 57.0468   5
  -1   7  -9 644.497 70.6886   4
   1  -7  10 401.419 52.7994   5
  -1   7 -10 384.253 54.2647   4
   1  -7  10 330.014 47.1630   4
   1  -7  11 403.625 53.8239   4
  -1   7 -11 427.803 58.3550   4
   1  -7  11 420.837 52.7101   5
   1  -7  12 521.190 60.6549   5
   1  -7  12 434.704 39.0189   2
  -1   7 -12 430.423 59.1930   4
   1  -7  12 506.677 61.1278   4
   1  -7  12 483.771 27.7128   1
   1  -7  13 119.348 31.4834   5
   1  -7  13 162.002 19.8891   1
   1  -7  13 119.391 30.7267   4
   1  -7  13 162.908 26.7697   2
   1  -7  14 167.721 22.0084   1
   1  -7  14 78.5964 27.9587   5
   1  -7  14 120.794 25.7585   2
   1  -7  14 115.563 30.1530   4
   1  -7  15 322.331 51.8499   5
   1  -7  15 294.361 51.3316   4
   1  -7  15 315.803 43.0623   2
   1  -7  15 293.104 32.0556   1
   1  -7  16-2.79871 9.24735   1
   1  -7  16-3.52915 19.4305   4
   1  -7  16-2.67550 14.1406   5
   1  -7  16-1.50116 13.6334   2
   1  -7  17-3.85075 19.8443   4
  -1   7 -17 60.1521 27.3435   4
   1  -7  17 5.94591 13.0470   2
   1  -7  17 18.8459 13.7966   1
   1  -7  17 29.4943 16.1870   5
   1  -7  18 2.85313 13.8425   5
   1  -7  18 36.1544 16.2301   1
   1  -7  18 26.8572 20.2777   2
   1  -7  18 62.0274 44.9225   3
   1  -7  18-7.74242 20.5921   4
   1  -7  19 46.1216 25.0085   2
   1  -7  19 41.8566 28.0046   5
   1  -7  19 6.41043 14.8431   4
   1  -7  19 28.8350 35.7593   3
   1  -7  19 27.9481 11.8903   1
   1  -7  20-0.89411 13.5525   5
   1  -7  20-1.65209 16.3202   1
   1  -7  20 23.2189 43.1060   3
   1  -7  21 27.6802 23.9332   5
   1  -7  21-2.03373 28.3540   3
   1  -7  22 99.2183 54.9930   3
   1  -7  23 106.636 55.8751   3
   1  -7  24 24.3448 72.0233   3
  -1   6  19-12.2396 23.8149   1
  -1   6  18-53.7251 39.9821   1
  -1   6  17-45.2026 31.9004   1
  -1   6  16-7.80232 28.0363   1
  -1   6  15 16.4419 33.7759   1
  -1   6  14 38.0072 28.0376   1
  -1   6  13 418.225 70.7902   1
  -1   6  12 285.349 19.0569   5
  -1   6  12 359.652 69.0342   1
  -1   6  11 612.645 35.8645   5
  -1   6  11 633.534 85.8577   1
  -1   6  10 776.539 46.0232   5
   1  -6 -10 849.514 113.356   3
  -1   6  10 900.552 95.2407   1
  -1   6   9 437.459 36.6271   5
  -1   6   9 430.206 70.5873   2
   1  -6  -9 291.545 63.9232   3
  -1   6   9 488.711 72.7629   1
  -1   6   8 381.291 59.1129   1
   1  -6  -8 340.082 66.5437   3
  -1   6   8 276.148 31.8066   5
  -1   6   8 292.374 53.6853   2
   1  -6  -8 341.186 56.1884   2
  -1   6   7 33.9549 25.4467   1
  -1   6   7 13.7392 7.65954   5
   1  -6  -7-3.64154 11.8040   2
  -1   6   6 221.560 28.9946   5
   1  -6  -6 219.194 40.7156   2
  -1   6   6 257.005 44.1203   1
  -1   6   5 21.6296 12.7258   5
  -1   6   5 12.2046 16.4015   1
   1  -6  -5-4.65814 16.4984   2
  -1   6   4 4892.94 136.829   5
   1  -6  -4 4570.60 166.718   2
  -1   6   4 5024.82 177.408   1
  -1   6   3 3746.73 121.086   5
   1  -6  -3 3858.53 143.464   2
  -1   6   2 2688.80 103.508   5
   1  -6  -2 2744.16 116.375   2
  -1   6   1 2824.74 115.877   2
  -1   6   1 2806.39 106.482   5
   1  -6  -1 2865.28 111.697   2
   1  -6   0 1186.55 66.9003   2
  -1   6   0 1156.71 67.8030   2
  -1   6   0 1097.20 66.1213   5
  -1   6  -1 4.35290 10.0153   2
  -1   6  -1 8.08250 10.7453   1
  -1   6  -1 8.31366 9.11114   5
  -1   6  -2 4456.04 133.775   5
   1  -6   2 4328.04 148.001   5
  -1   6  -2 4539.61 108.810   1
  -1   6  -2 4515.47 112.209   2
  -1   6  -3 1106.56 49.9675   2
  -1   6  -3 1079.41 66.7108   5
  -1   6  -3 1088.97 47.8196   1
  -1   6  -4 629.403 59.1101   4
  -1   6  -4 661.489 31.0611   1
  -1   6  -4 651.117 32.7723   2
  -1   6  -4 690.586 54.5145   5
  -1   6  -5 18.2703 11.4092   5
  -1   6  -5 14.7592 5.20036   1
  -1   6  -5 28.7288 16.9395   4
  -1   6  -5 19.8637 6.21320   2
  -1   6  -6 40.8148 18.3750   5
  -1   6  -6 9.93943 15.3980   4
   1  -6   6-1.73537 12.5010   4
  -1   6  -7 5123.92 154.436   5
   1  -6   7 5268.94 170.177   4
   1  -6   7 5525.63 170.133   5
  -1   6  -7 5816.27 189.458   4
  -1   6  -8-1.76137 9.76063   5
   1  -6   8 8.28351 14.1559   5
  -1   6  -8-10.1090 16.4241   4
   1  -6   8-11.5694 15.2021   4
  -1   6  -9 1563.51 89.0897   5
  -1   6  -9 1348.81 99.0634   4
   1  -6   9 1483.54 92.4893   5
   1  -6   9 1484.43 95.6394   4
   1  -6  10 171.849 35.5265   5
  -1   6 -10 220.731 43.2495   4
   1  -6  10 209.150 16.7445   1
   1  -6  10 209.495 39.3305   4
   1  -6  10 204.003 22.8819   2
   1  -6  11 75.0457 26.1026   5
   1  -6  11 81.7514 26.3794   4
   1  -6  11 78.8703 16.7210   2
   1  -6  11 76.8092 12.8213   1
  -1   6 -11 60.7193 27.0840   4
   1  -6  12 315.254 28.0806   1
   1  -6  12 300.566 47.8429   4
   1  -6  12 258.645 34.2591   2
  -1   6 -12 315.255 48.1772   4
   1  -6  12 356.236 47.9491   5
   1  -6  13 143.928 35.8021   4
   1  -6  13 150.731 27.6847   2
   1  -6  13 229.196 26.9057   1
   1  -6  13 195.158 36.8857   5
   1  -6  14 84.9336 28.1535   4
   1  -6  14 75.8649 25.9667   5
   1  -6  14 58.0603 15.8693   1
   1  -6  14 57.8234 16.9783   2
   1  -6  15 771.094 71.7137   2
   1  -6  15 746.273 75.3464   5
   1  -6  15 803.948 57.5185   1
   1  -6  15 818.869 84.8297   4
   1  -6  16 640.257 78.8868   4
   1  -6  16 664.601 55.9559   1
   1  -6  16 682.762 73.5737   2
   1  -6  16 739.181 77.3463   5
   1  -6  17 1266.47 102.881   5
   1  -6  17 1110.68 98.9705   2
   1  -6  17 1422.43 162.748   3
   1  -6  17 1342.24 84.4346   1
   1  -6  17 1168.45 108.857   4
   1  -6  18 519.190 68.4036   5
   1  -6  18 662.081 118.499   3
   1  -6  18 564.676 73.9360   2
   1  -6  18 659.767 62.5759   1
   1  -6  18 645.458 83.4812   4
   1  -6  19 24.9329 25.8463   3
   1  -6  19-14.9625 16.6838   2
   1  -6  19 3.86984 16.4170   5
   1  -6  19 18.6000 20.6254   1
   1  -6  19-10.3450 18.9105   4
   1  -6  20 11.4394 17.1622   1
   1  -6  20-5.48426 29.5433   3
   1  -6  20 21.3257 23.2027   5
   1  -6  21 26.9002 29.6664   3
   1  -6  21 66.0453 26.1831   1
   1  -6  22 52.5348 46.2762   3
   1  -6  23 39.9707 49.7739   3
   1  -6  24 138.932 79.4272   3
  -1   5  20 149.944 52.5386   1
  -1   5  19 76.4325 44.8413   1
  -1   5  18-2.18150 18.8235   1
  -1   5  17 35.2121 34.7874   1
  -1   5  16 219.114 59.2869   1
  -1   5  15-41.2782 38.3928   1
  -1   5  14 58.0791 31.1507   1
  -1   5  13 210.362 17.3276   5
  -1   5  13 207.014 51.1860   1
  -1   5  12 311.003 26.5723   5
  -1   5  12 308.296 60.0975   1
   1  -5 -11 7.04255 18.4644   2
   1  -5 -11-16.3245 18.9697   3
  -1   5  11-4.31654 17.8121   1
  -1   5  10 649.376 80.4524   1
  -1   5  10 733.998 91.1544   2
   1  -5 -10 577.909 91.0641   3
   1  -5 -10 632.553 78.7210   2
  -1   5   9 1119.83 101.161   1
   1  -5  -9 1140.74 98.8802   2
  -1   5   9 1185.03 110.194   2
   1  -5  -9 1136.42 122.644   3
   1  -5  -8 35.2186 24.2782   2
  -1   5   8 10.7181 16.6160   1
   1  -5  -8-9.43901 15.8699   3
   1  -5  -7 1240.47 94.2381   2
   1  -5  -7 1254.19 117.513   3
   1  -5  -6 1782.62 108.338   2
   1  -5  -5 9.78009 15.4671   2
   1  -5  -4 1456.66 89.2327   2
   1  -5  -3 5839.71 169.118   2
  -1   5   2 39.6476 13.8768   5
  -1   5   2 51.9372 17.4324   2
   1  -5  -2 48.4267 16.8368   2
  -1   5   1 341.821 35.9334   5
   1  -5  -1 415.378 40.3588   2
  -1   5   1 374.792 37.7931   2
  -1   5   0 842.912 53.9908   2
   1  -5   0 932.563 54.5303   2
  -1   5   0 858.105 57.0308   5
   1  -5   1 1023.55 52.1914   2
  -1   5  -1 1075.42 63.4843   5
  -1   5  -1 1031.63 54.1817   2
  -1   5  -2 390.451 37.8474   5
  -1   5  -2 390.411 29.7897   2
   1  -5   2 393.804 29.0476   2
  -1   5  -3 6264.80 100.658   2
  -1   5  -3 6519.00 154.372   5
   1  -5   4 860.556 60.1392   4
  -1   5  -4 905.109 27.5967   1
  -1   5  -4 891.954 58.5269   5
  -1   5  -4 890.290 29.3193   2
  -1   5  -4 903.203 65.7058   4
  -1   5  -5 1760.50 82.8650   5
   1  -5   5 1972.19 94.2548   5
   1  -5   5 1896.88 92.9602   4
  -1   5  -5 1895.86 97.4571   4
   1  -5   6 141.610 27.4738   5
  -1   5  -6 161.101 25.5583   5
   1  -5   6 125.861 27.1119   4
  -1   5  -6 140.953 30.5116   4
   1  -5   7 872.264 66.8736   4
  -1   5  -7 941.768 74.2826   4
   1  -5   7 835.701 64.1137   5
  -1   5  -7 843.071 60.6676   5
   1  -5   8 3495.52 141.817   4
  -1   5  -8 3673.06 150.351   4
   1  -5   8 3608.07 60.7744   1
   1  -5   8 3514.83 77.2433   2
   1  -5   8 3589.29 132.544   5
  -1   5  -8 3578.94 124.876   5
  -1   5  -9 759.610 58.9498   5
   1  -5   9 762.018 44.3877   2
  -1   5  -9 682.877 67.2774   4
   1  -5   9 689.114 65.3908   4
   1  -5   9 822.309 65.3298   5
   1  -5   9 775.036 35.2474   1
   1  -5  10 948.710 79.6774   4
  -1   5 -10 913.449 79.7670   4
   1  -5  10 935.972 72.0440   5
   1  -5  10 817.926 53.2368   2
   1  -5  10 938.315 45.5703   1
   1  -5  11 110.731 18.6821   1
   1  -5  11 143.163 25.4228   2
   1  -5  11 89.7220 26.0167   4
  -1   5 -11 137.259 32.2732   4
   1  -5  11 117.604 29.1134   5
   1  -5  12 522.238 51.0813   2
   1  -5  12 498.336 61.5150   4
   1  -5  12 584.041 58.1279   5
   1  -5  12 574.241 43.8038   1
  -1   5 -12 475.977 60.5731   4
   1  -5  13 273.094 41.9911   5
   1  -5  13 317.375 43.7669   2
   1  -5  13 304.308 47.5172   4
   1  -5  13 392.757 39.5492   1
   1  -5  14 60.6120 21.5994   2
   1  -5  14 60.0864 17.3682   1
   1  -5  14 34.9394 17.1558   4
   1  -5  14 92.7732 27.1286   5
   1  -5  15 1250.56 93.1839   5
   1  -5  15 1249.09 140.737   3
   1  -5  15 1254.17 79.7849   1
   1  -5  15 1168.41 105.057   4
   1  -5  15 1294.16 99.8902   2
   1  -5  16-0.95948 16.8066   2
   1  -5  16 72.6337 39.6545   3
   1  -5  16-0.98559 21.1000   4
   1  -5  16 58.7553 20.7588   5
   1  -5  16 32.8775 14.2441   1
   1  -5  17 785.058 89.8629   4
   1  -5  17 852.017 81.9853   5
   1  -5  17 753.827 84.9488   2
   1  -5  17 762.187 68.3069   1
   1  -5  17 881.964 127.737   3
   1  -5  18 257.717 56.8030   4
   1  -5  18 295.087 49.4601   5
   1  -5  18 327.388 87.8633   3
   1  -5  18 329.229 48.7369   1
   1  -5  18 276.714 54.8710   2
   1  -5  19 322.091 53.1229   1
   1  -5  19 261.343 58.3217   2
   1  -5  19 323.226 85.0294   3
   1  -5  19 257.915 55.2239   4
   1  -5  19 338.193 55.1853   5
   1  -5  20 95.3841 30.1626   1
   1  -5  20 72.6193 50.5393   3
   1  -5  21-54.3468 41.5287   3
   1  -5  21-7.87455 13.6395   1
   1  -5  22 5.34630 26.0945   3
   1  -5  23-56.2748 47.8779   3
   1  -5  24 4.98727 40.7638   3
  -1   4  21 0.22914 27.4254   1
  -1   4  20 37.8684 32.5947   1
  -1   4  19 2.76683 32.3103   1
  -1   4  18 59.1604 33.9339   1
  -1   4  17 55.7481 36.9418   1
  -1   4  16 54.0116 29.8982   1
  -1   4  15 7.25437 23.1673   1
  -1   4  15 29.3075 19.9106   4
  -1   4  14 21.2123 6.00879   5
  -1   4  14 22.8919 35.4062   1
   1  -4 -13 76.3485 29.9812   2
  -1   4  13 55.1803 24.0649   1
   1  -4 -12 83.2174 30.3577   2
  -1   4  12 71.2643 27.6259   1
   1  -4 -12 121.054 42.9275   3
  -1   4  11 251.946 54.5468   2
   1  -4 -11 197.429 59.3737   3
  -1   4  11 273.498 54.5239   1
   1  -4 -11 316.055 58.4083   2
  -1   4  10 157.132 42.7033   1
   1  -4 -10 162.964 47.8330   3
   1  -4 -10 174.634 41.8409   2
  -1   4  10 149.106 41.6205   2
  -1   4   9 42.1384 20.0788   2
   1  -4  -9 24.0172 14.1481   2
   1  -4  -9 56.3308 27.5893   3
   1  -4  -8 390.092 66.3616   3
   1  -4  -8 358.723 52.2562   2
   1  -4  -7 785.652 89.5110   3
   1  -4  -7 822.977 74.1898   2
   1  -4  -6 76.7542 23.3226   2
   1  -4  -5 57.2636 19.7985   2
   1  -4  -4 235.095 38.8670   2
   1  -4  -3 831.008 60.3226   2
  -1   4   2 48.9188 16.9283   2
   1  -4  -2 67.5772 19.2199   2
   1  -4  -1 469.074 39.2810   2
  -1   4   1 467.643 41.3408   2
   1  -4   0 194.393 23.8552   2
  -1   4   0 195.844 23.8196   2
  -1   4   0 197.088 26.4071   5
   1  -4   1 284.444 24.8831   2
  -1   4  -1 277.824 25.9862   2
  -1   4  -1 292.488 32.2678   5
  -1   4  -2 2823.63 68.0375   2
  -1   4  -2 2753.50 96.0166   5
   1  -4   2 2825.87 63.5928   2
  -1   4  -3 5102.22 74.3387   2
   1  -4   3 5114.68 136.260   4
   1  -4   3 5021.98 65.1957   2
  -1   4  -3 5011.68 128.990   5
   1  -4   4 1294.01 69.1173   5
  -1   4  -4 1207.30 62.9678   5
  -1   4  -4 1224.56 73.7490   4
   1  -4   4 1226.30 70.6662   4
   1  -4   5 111.986 25.0668   5
  -1   4  -5 84.6321 16.9788   5
  -1   4  -5 73.4638 21.4072   4
   1  -4   5 78.1185 18.5458   4
  -1   4  -6 389.585 37.4861   5
   1  -4   6 365.121 39.3614   5
  -1   4  -6 376.801 46.6283   4
   1  -4   6 373.707 42.7264   4
   1  -4   7 146.623 15.9795   2
   1  -4   7 135.871 14.0410   1
   1  -4   7 137.658 25.2542   5
   1  -4   7 127.491 27.7119   4
  -1   4  -7 167.147 25.8739   5
  -1   4  -7 142.393 30.4608   4
   1  -4   8 4624.77 90.6963   1
   1  -4   8 4526.98 140.856   5
   1  -4   8 4425.63 101.393   2
   1  -4   8 4431.19 160.307   4
  -1   4  -8 4378.90 160.936   4
  -1   4  -8 4356.88 129.334   5
   1  -4   9 79.3736 19.8368   5
  -1   4  -9 43.0313 17.7350   4
   1  -4   9 50.9332 19.0396   4
   1  -4   9 60.0895 13.4924   1
   1  -4   9 82.5722 18.7436   2
   1  -4  10 468.431 38.0414   1
   1  -4  10 385.601 51.4050   4
   1  -4  10 477.352 48.2879   5
   1  -4  10 460.501 43.2512   2
  -1   4 -10 449.286 55.7137   4
   1  -4  11 41.5114 12.0185   1
   1  -4  11 67.4585 21.0744   4
  -1   4 -11 49.4228 23.0821   4
   1  -4  11 44.1801 18.9579   5
   1  -4  11 50.1088 19.3938   2
   1  -4  12 2212.09 111.897   5
  -1   4 -12 2364.15 132.268   4
   1  -4  12 2303.12 98.4604   1
   1  -4  12 2325.62 113.525   2
   1  -4  12 2168.83 132.849   4
   1  -4  13 465.651 47.5841   1
   1  -4  13 442.301 51.5162   5
   1  -4  13 420.375 53.0636   2
   1  -4  13 450.888 63.8169   4
   1  -4  14 3599.13 147.697   5
   1  -4  14 3622.68 139.100   1
   1  -4  14 3418.39 158.841   2
   1  -4  14 3525.67 180.158   4
   1  -4  14 3560.99 230.995   3
   1  -4  15 51.5599 39.0804   3
   1  -4  15 60.3179 25.0017   2
   1  -4  15 11.2233 22.3148   1
   1  -4  15 30.9428 19.5203   5
   1  -4  15 72.0495 30.3954   4
   1  -4  16 996.140 79.7449   1
   1  -4  16 1024.55 104.247   4
   1  -4  16 1326.94 95.5915   5
   1  -4  16 1052.19 135.262   3
   1  -4  16 918.536 94.2447   2
   1  -4  17 235.202 41.1915   1
   1  -4  17 343.370 85.0288   3
   1  -4  17 259.895 54.2388   4
   1  -4  17 279.044 45.0036   5
   1  -4  17 270.101 54.0530   2
   1  -4  18 94.2626 33.2877   2
   1  -4  18 208.141 40.7922   5
   1  -4  18 80.0558 32.0909   4
   1  -4  18 177.195 68.3823   3
   1  -4  18 132.894 32.1026   1
   1  -4  19 61.1490 43.3408   3
   1  -4  19 71.4483 26.6357   1
   1  -4  19 65.1869 20.3361   4
   1  -4  19 55.9085 31.9987   2
   1  -4  20-8.62868 15.8388   1
   1  -4  20 55.4775 50.5671   3
   1  -4  21 80.8620 56.2958   3
   1  -4  21-0.23676 14.1263   1
   1  -4  22-46.8277 44.2011   3
   1  -4  23-19.4870 38.1095   3
  -1   3  22-61.4335 41.4306   1
  -1   3  21-43.0216 34.1635   1
  -1   3  20 12.2164 31.5552   1
  -1   3  19 63.2040 40.3996   1
  -1   3  18-43.6207 34.1199   1
  -1   3  17 56.2774 27.1536   1
  -1   3  16 81.8324 29.5551   4
  -1   3  16 80.6678 41.2773   1
  -1   3  15 104.871 40.8047   1
  -1   3  15 111.466 35.8499   4
  -1   3  15 66.0447 12.3526   5
  -1   3  14 77.2811 33.8472   1
   1  -3 -14 23.6490 18.2139   2
  -1   3  13 206.530 48.9731   1
   1  -3 -13 216.656 48.3005   2
   1  -3 -12 56.1712 38.5872   3
   1  -3 -12 15.5093 18.0297   2
  -1   3  12 33.0429 19.2737   1
  -1   3  12 82.0550 35.6027   2
   1  -3 -11 588.883 73.1104   2
  -1   3  11 677.907 88.7266   2
   1  -3 -11 616.135 92.1500   3
   1  -3 -10 34.6979 27.1291   2
   1  -3 -10 16.0580 28.7992   3
  -1   3  10 17.0110 17.5983   2
   1  -3  -9 395.808 54.4450   2
   1  -3  -9 467.167 72.3910   3
  -1   3   9 447.294 63.3620   2
   1  -3  -8 1657.53 129.074   3
   1  -3  -8 1567.68 102.343   2
   1  -3  -7 2366.58 146.920   3
   1  -3  -7 2506.91 124.146   2
   1  -3  -6 399.282 57.8079   3
   1  -3  -6 357.768 47.6246   2
   1  -3  -5 367.490 43.6224   2
   1  -3  -4 118.344 25.9681   2
   1  -3  -3 406.243 40.9577   2
   1  -3  -2-0.87064 8.60063   2
   1  -3  -1 10159.5 166.862   2
  -1   3   1 9775.69 171.142   2
  -1   3   0 1929.03 68.7706   2
   1  -3   0 2032.88 67.1744   2
  -1   3  -1 17631.6 181.237   2
   1  -3   1 17403.7 168.112   2
  -1   3  -2 24440.2 275.905   5
   1  -3   2 26066.2 162.593   2
  -1   3  -2 25662.7 188.222   2
   1  -3   2 25392.6 284.881   4
  -1   3  -3 5408.23 124.723   5
   1  -3   3 5359.15 138.173   4
   1  -3   4 551.465 42.9938   5
  -1   3  -4 496.958 37.8324   5
   1  -3   4 577.811 47.7480   4
  -1   3  -4 488.391 46.4032   4
   1  -3   5 1513.39 42.8249   1
   1  -3   5 1595.52 83.2117   4
  -1   3  -5 1467.77 65.9525   5
  -1   3  -5 1481.88 82.0185   4
  -1   3  -5 1463.45 36.8164   1
   1  -3   5 1527.62 72.1181   5
   1  -3   6 144.109 15.9686   1
   1  -3   6 177.491 26.8856   5
   1  -3   6 138.020 14.7422   2
   1  -3   6 134.189 26.8412   4
  -1   3  -6 101.257 25.1210   4
  -1   3  -6 125.825 20.2485   5
   1  -3   7 11.5474 11.3652   5
   1  -3   7 2.67603 13.8718   4
   1  -3   7 13.4390 8.46337   2
  -1   3  -7 19.9612 11.6995   5
  -1   3  -7 15.7217 15.2231   4
   1  -3   7 21.6363 10.9264   1
   1  -3   8 547.294 37.8413   1
   1  -3   8 523.847 45.3759   5
   1  -3   8 490.626 54.8605   4
  -1   3  -8 547.910 58.0950   4
   1  -3   8 550.014 40.2110   2
  -1   3  -8 534.735 42.8771   5
   1  -3   9 810.209 72.7356   4
  -1   3  -9 782.010 69.9935   4
   1  -3   9 839.429 51.0442   1
   1  -3   9 813.246 58.2126   5
   1  -3   9 785.108 53.2063   2
   1  -3  10 791.114 53.8482   1
   1  -3  10 742.355 71.8743   4
   1  -3  10 748.564 57.3162   5
   1  -3  10 743.925 57.6475   2
  -1   3 -10 763.905 72.0206   4
  -1   3 -11 36.5903 20.2506   4
   1  -3  11 26.4878 14.6561   5
   1  -3  11 34.2433 14.1381   2
   1  -3  11 19.9800 8.87194   1
   1  -3  11 14.0501 13.2030   4
   1  -3  12 42.8309 31.9867   3
   1  -3  12 100.066 24.6603   5
   1  -3  12 76.6201 24.3480   2
   1  -3  12 74.3906 22.7811   1
   1  -3  12 122.519 31.5086   4
   1  -3  13 7.58026 14.1730   4
   1  -3  13 18.0352 13.3375   5
   1  -3  13 19.6665 21.8415   3
   1  -3  13 28.9134 18.3947   1
   1  -3  13 19.8854 16.3834   2
   1  -3  14 199.532 36.7143   1
   1  -3  14 245.645 37.6444   5
   1  -3  14 259.525 71.9145   3
   1  -3  14 229.484 42.6674   2
   1  -3  14 142.380 38.9535   4
   1  -3  15 1467.24 155.567   3
   1  -3  15 1320.06 122.816   2
   1  -3  15 1372.76 90.7345   5
   1  -3  15 1378.32 120.546   4
   1  -3  15 1382.01 96.3876   1
   1  -3  16 449.464 92.0663   3
   1  -3  16 506.745 56.2867   5
   1  -3  16 521.930 73.1385   2
   1  -3  16 506.830 74.6847   4
   1  -3  16 450.838 60.1559   1
   1  -3  17 411.388 57.4422   1
   1  -3  17 260.536 69.6370   3
   1  -3  17 346.818 63.8648   4
   1  -3  17 380.841 66.7892   2
   1  -3  18 72.9465 45.6324   3
   1  -3  18 127.531 41.4023   4
   1  -3  18 80.3194 35.3722   2
   1  -3  18 116.714 35.7400   1
   1  -3  19 37.4528 43.2841   3
   1  -3  19 34.2952 18.3122   1
   1  -3  20 31.4373 40.6391   3
   1  -3  20 48.4285 24.3842   1
   1  -3  21-22.0481 20.0027   1
   1  -3  21-17.8845 32.6826   3
   1  -3  22-6.87302 22.8275   1
   1  -3  22 29.6071 44.1913   3
   1  -3  23 48.3310 55.9389   3
  -1   2  22 57.0017 40.6143   1
  -1   2  21 81.5493 42.9713   1
  -1   2  20 40.9339 34.3696   1
  -1   2  19 38.5686 26.2415   1
  -1   2  18 68.2191 29.1957   1
  -1   2  17 24.9822 22.5900   1
  -1   2  16 30.0793 10.2220   5
  -1   2  16 48.5446 28.1827   1
   1  -2 -16 19.2325 21.8930   2
  -1   2  16 64.5507 27.9935   4
  -1   2  15 426.669 35.7153   5
  -1   2  15 429.447 64.8902   4
   1  -2 -15 414.434 69.1354   2
  -1   2  15 420.205 70.2987   1
   1  -2 -14 8.34124 16.0767   2
  -1   2  14 9.92315 18.8020   4
  -1   2  14-26.2177 30.2685   1
  -1   2  13 431.329 74.8623   2
  -1   2  13 630.085 79.0093   1
   1  -2 -13 549.373 73.7688   2
  -1   2  13 479.080 62.6722   4
   1  -2 -12 284.832 68.9072   3
   1  -2 -12 299.265 52.9920   2
  -1   2  12 270.392 56.5428   2
   1  -2 -11 783.090 81.4232   2
  -1   2  11 888.263 97.5186   2
   1  -2 -11 826.957 103.180   3
  -1   2  10 1650.29 126.389   2
   1  -2 -10 1630.66 136.297   3
   1  -2 -10 1718.21 112.787   2
   1  -2  -9 700.733 86.4378   3
   1  -2  -9 679.090 66.8765   2
  -1   2   9 772.672 81.7636   2
  -1   2   8 6598.21 224.824   2
   1  -2  -8 6629.23 202.088   2
   1  -2  -8 6579.81 244.610   3
   1  -2  -7 4412.56 187.797   3
   1  -2  -7 4474.69 158.240   2
   1  -2  -6 54.7823 25.7584   3
   1  -2  -6 21.1534 19.2128   2
   1  -2  -5 38.8910 16.4440   2
   1  -2  -5 27.7318 19.8986   3
   1  -2  -4 502.699 45.9567   2
   1  -2  -3 1344.75 68.6143   2
   1  -2  -2 5513.03 126.989   2
   1  -2  -1 1732.18 65.4870   2
  -1   2   1 1618.59 66.5494   2
   1  -2   0 176.895 20.7025   4
  -1   2   0 186.488 21.3492   2
  -1   2  -1 7495.67 112.233   2
  -1   2  -2 13777.9 140.325   1
   1  -2   2 13894.8 203.537   4
   1  -2   3 3970.89 117.556   4
  -1   2  -3 4273.61 102.948   5
  -1   2  -3 4116.14 68.0377   1
   1  -2   3 4382.61 75.0677   1
  -1   2  -3 4117.27 122.120   4
   1  -2   4 270.151 19.5817   1
  -1   2  -4 305.261 19.3063   1
   1  -2   4 295.656 34.7322   4
  -1   2  -4 302.507 37.9375   4
  -1   2  -4 267.796 25.7693   5
  -1   2  -5 4832.16 143.883   4
   1  -2   5 4511.88 88.6427   1
  -1   2  -5 4662.19 105.251   5
   1  -2   5 4629.44 83.1339   2
   1  -2   5 4682.44 144.886   4
   1  -2   5 4653.39 117.563   5
  -1   2  -5 4554.01 85.5415   1
   1  -2   6 91.8508 18.6628   5
  -1   2  -6 72.9243 14.4772   5
   1  -2   6 54.7992 11.9229   2
   1  -2   6 86.7664 16.7011   1
   1  -2   6 85.8305 22.2054   4
  -1   2  -6 64.1093 19.1926   4
   1  -2   7-1.77809 7.25322   2
   1  -2   7 4.96198 7.24577   5
  -1   2  -7 0.96044 6.05681   5
   1  -2   7-11.0874 13.1096   1
  -1   2  -7-9.98309 13.3610   4
   1  -2   7 15.6001 14.6469   4
   1  -2   8 628.346 46.2064   1
   1  -2   8 597.202 45.6651   2
   1  -2   8 695.607 49.4783   5
   1  -2   8 610.322 61.0158   4
  -1   2  -8 615.146 60.2884   4
  -1   2  -9 494.570 56.1133   4
   1  -2   9 466.414 42.4971   1
   1  -2   9 363.948 49.8781   4
   1  -2   9 383.479 39.7361   2
   1  -2   9 395.008 37.5281   5
   1  -2  10 61.2902 19.6132   2
   1  -2  10 123.846 25.0590   1
   1  -2  10 59.2705 15.2144   5
   1  -2  10 63.5934 23.9560   4
   1  -2  11 223.541 31.3753   5
   1  -2  11 244.233 35.1454   1
   1  -2  11 219.092 55.3797   3
   1  -2  11 226.534 41.7706   4
   1  -2  11 186.103 34.2786   2
   1  -2  12 177.893 40.4350   4
   1  -2  12 119.952 23.5225   5
   1  -2  12 120.520 26.7303   2
   1  -2  12 194.652 52.3133   3
   1  -2  12 144.073 29.2566   1
   1  -2  13-21.2619 29.4993   3
   1  -2  13-12.2769 14.8803   4
   1  -2  13-3.15319 13.7952   2
   1  -2  13-1.25954 10.3090   5
   1  -2  13 0.15191 13.1975   1
   1  -2  14-6.88735 12.0156   5
   1  -2  14 25.5861 22.6062   3
   1  -2  14 5.45368 11.9410   4
   1  -2  14 27.9883 20.4280   2
   1  -2  14 6.46214 14.2845   1
   1  -2  15 994.718 88.3568   1
   1  -2  15 799.168 119.484   3
   1  -2  15 909.572 99.5999   4
   1  -2  15 903.293 94.5288   2
   1  -2  16 494.286 73.9043   2
   1  -2  16 430.186 61.8092   1
   1  -2  16 503.883 76.5282   4
   1  -2  16 489.744 94.9427   3
   1  -2  17 160.400 48.7735   4
   1  -2  17 204.400 51.8085   2
   1  -2  17 120.984 50.1652   3
   1  -2  17 198.381 46.9221   1
   1  -2  18 19.9383 31.2168   3
   1  -2  18 48.3061 26.7833   1
   1  -2  18-19.7594 23.8684   4
   1  -2  19 109.161 37.0539   1
   1  -2  19 184.805 68.8797   3
   1  -2  20 29.1794 23.9086   1
   1  -2  20 43.6941 40.5364   3
   1  -2  21 73.9511 52.5667   3
   1  -2  21 101.733 37.3079   1
   1  -2  22 12.7194 18.2443   1
  -1   1  23 9.71827 32.2589   1
  -1   1  22 67.6023 43.7913   1
  -1   1  21 125.602 47.2565   1
  -1   1  20-43.4223 33.5358   1
  -1   1  19 81.2769 34.1997   1
  -1   1  18 18.4806 19.3965   1
  -1   1  17-4.61822 6.51962   5
   1  -1 -17-40.7214 35.1101   2
  -1   1  17-5.07379 18.4192   1
  -1   1  17-16.1917 17.3534   4
  -1   1  16 429.904 70.2599   1
  -1   1  16 386.721 37.9717   5
  -1   1  16 420.634 65.7253   4
   1  -1 -16 368.703 62.2898   2
   1  -1 -15 2.95627 20.4054   2
  -1   1  15 8.16047 22.5331   1
  -1   1  15 41.6961 23.3512   4
  -1   1  14 173.960 39.1937   4
   1  -1 -14 106.077 37.5830   2
  -1   1  14 45.7116 25.9021   1
  -1   1  14 97.5355 35.5591   2
  -1   1  13 141.481 32.0493   4
  -1   1  13 134.936 41.3406   2
   1  -1 -13 87.2813 29.7875   2
  -1   1  12 23.0583 13.7245   4
   1  -1 -12 6.40391 15.3939   2
  -1   1  12 2.80894 15.0998   2
   1  -1 -11 353.734 52.6846   2
  -1   1  11 356.783 60.1164   2
   1  -1 -10 165.464 42.4279   3
  -1   1  10 170.583 40.8414   2
   1  -1 -10 210.231 39.2131   2
   1  -1  -9 46.3221 27.1311   3
   1  -1  -9 91.2100 29.9154   2
  -1   1   9 51.0899 25.4404   2
   1  -1  -8 4934.85 168.623   2
  -1   1   8 4804.05 186.623   2
   1  -1  -8 4799.05 198.934   3
   1  -1  -7 976.854 72.2615   2
   1  -1  -7 1024.43 85.7840   3
  -1   1   7 1094.33 84.5557   2
   1  -1  -6 975.135 68.5618   2
   1  -1  -6 1052.66 79.2423   3
  -1   1   6 972.476 74.2861   2
   1  -1  -5 563.601 53.8234   3
   1  -1  -5 612.818 50.9486   2
  -1   1   5 554.556 53.4378   2
   1  -1  -4 3619.84 116.997   2
   1  -1  -4 3709.24 120.723   3
   1  -1  -3 2736.43 94.7348   2
   1  -1  -2 6705.40 139.025   2
   1  -1   2 499.405 30.2941   1
  -1   1  -2 418.651 26.2872   1
   1  -1   2 430.164 35.7811   4
  -1   1  -3 543.422 34.6462   5
  -1   1  -3 508.743 43.9964   4
   1  -1   3 536.684 31.9912   1
  -1   1  -3 534.231 29.0938   1
   1  -1   3 525.132 44.4079   4
  -1   1  -4 601.598 34.1302   5
   1  -1   4 565.871 48.5044   4
  -1   1  -4 627.942 51.2400   4
   1  -1   4 573.049 34.3469   1
  -1   1  -4 612.704 34.7775   1
  -1   1  -5 79.2737 13.2226   5
  -1   1  -5 42.5632 15.6715   4
   1  -1   5 67.3940 13.4370   2
   1  -1   5 66.6922 12.9534   1
   1  -1   5 64.9988 17.2385   4
  -1   1  -5 78.3705 15.6659   1
   1  -1   6 825.779 49.0073   1
  -1   1  -6 824.871 40.3825   5
   1  -1   6 813.370 47.0926   2
  -1   1  -6 825.184 64.3145   4
   1  -1   6 814.521 65.7159   4
  -1   1  -6 775.260 46.5275   1
   1  -1   7 2004.73 74.5434   5
   1  -1   7 1935.83 81.3131   2
  -1   1  -7 2003.85 65.5437   5
   1  -1   7 2033.05 107.334   4
   1  -1   7 1925.93 81.5467   1
   1  -1   8 2139.42 93.7248   2
   1  -1   8 2157.32 93.4971   1
   1  -1   8 2045.46 78.0940   5
   1  -1   8 2093.65 116.652   4
   1  -1   9 70.5456 24.6111   1
   1  -1   9 57.2986 14.3114   5
   1  -1   9 59.2931 21.1304   4
   1  -1   9 45.3550 15.4657   2
   1  -1  10 2015.23 105.907   2
   1  -1  10 1972.08 82.6085   5
   1  -1  10 2141.00 129.291   4
   1  -1  10 2117.65 104.305   1
   1  -1  11 98.4978 29.9892   4
   1  -1  11 92.9872 25.7723   2
   1  -1  11 96.6107 35.8057   3
   1  -1  11 80.3440 16.6575   5
   1  -1  11 121.321 29.2488   1
   1  -1  12 712.833 66.0557   1
   1  -1  12 746.219 102.230   3
   1  -1  12 640.724 76.8715   4
   1  -1  12 512.644 61.5673   2
   1  -1  13 555.080 64.4336   1
   1  -1  13 702.959 105.387   3
   1  -1  13 618.689 78.0513   4
   1  -1  13 611.653 72.1081   2
   1  -1  14 114.154 30.5659   2
   1  -1  14 168.538 56.2783   3
   1  -1  14 154.899 36.4374   1
   1  -1  14 129.256 40.0782   4
   1  -1  15 191.074 62.2571   3
   1  -1  15 140.851 36.6529   1
   1  -1  15 121.005 38.9437   2
   1  -1  15 107.234 38.3165   4
   1  -1  16 201.095 45.0438   1
   1  -1  16 252.593 54.5290   2
   1  -1  16 169.342 56.8519   3
   1  -1  16 310.904 59.4266   4
   1  -1  17 18.1805 21.6514   4
   1  -1  17 16.4887 27.9568   3
   1  -1  17 84.7271 32.3840   1
   1  -1  18-26.0229 31.0759   3
   1  -1  18-18.0009 22.5516   1
   1  -1  19 71.2677 48.3284   3
   1  -1  19 13.0459 14.8919   1
   1  -1  20-20.5651 23.2971   1
   1  -1  21 15.7269 18.2605   1
   1  -1  22 105.167 42.9858   1
  -1   0  24-70.2317 43.1635   1
  -1   0  23 11.3981 23.9074   1
  -1   0  22 135.573 52.3720   1
  -1   0  21-36.9284 26.5012   1
  -1   0  20-9.72095 22.9850   1
  -1   0  19 126.452 42.5154   1
  -1   0  18 0.28153 21.7389   1
   1   0 -18-9.96258 18.9165   2
  -1   0  18 0.64553 7.68291   5
  -1   0  17 180.569 27.6654   5
  -1   0  17 245.616 47.1601   4
   1   0 -17 141.480 41.7186   2
  -1   0  17 255.380 56.4351   1
  -1   0  16 20.6404 17.9240   4
   1   0 -16 38.7967 16.1618   2
  -1   0  16 25.2214 26.9699   1
  -1   0  16 22.9567 14.1888   5
  -1   0  15 307.068 49.6660   4
   1   0 -15 251.984 51.0724   2
   1   0 -14 6.12894 16.8814   2
  -1   0  14-20.5053 17.0296   2
  -1   0  14 7.10857 10.9759   4
  -1   0  13 1727.54 141.895   2
  -1   0  13 1645.73 102.031   4
   1   0 -13 1519.69 111.014   2
  -1   0  12 870.508 70.7566   4
  -1   0  12 776.802 89.9343   2
   1   0 -12 842.170 80.5740   2
  -1   0  11 1343.29 82.3956   4
   1   0 -11 1473.11 101.380   2
  -1   0  11 1239.63 109.745   2
  -1   0  10 526.430 67.4462   2
   1   0 -10 487.081 58.8666   2
  -1   0  10 565.806 49.8466   4
  -1   0  10 536.518 71.7721   3
  -1   0   9 46.8499 23.1122   3
  -1   0   9 53.0592 20.3391   2
   1   0  -9 11.4468 14.0898   2
  -1   0   8 1600.16 105.066   2
   1   0  -8 1491.24 89.2441   2
  -1   0   8 1595.42 104.315   3
   1   0  -7 401.522 45.9319   2
  -1   0   7 497.834 53.4007   3
  -1   0   7 454.505 51.6919   2
   1   0  -7 384.886 48.3906   3
   1   0  -6 1838.30 92.0390   2
  -1   0   6 1857.65 96.7598   3
  -1   0   6 1913.22 100.769   2
   1   0  -6 1810.61 96.2660   3
   1   0  -5 6146.00 157.606   2
   1   0  -5 6270.71 156.348   3
  -1   0   5 6188.21 169.202   2
   1   0  -4 5077.99 138.507   2
   1   0  -4 4718.70 117.972   3
  -1   0   4 4988.12 144.098   2
   1   0  -3 8185.45 165.583   2
   1   0  -3 8346.97 126.869   3
   1   0   2 7625.04 153.324   4
   1   0   2 7895.71 129.153   1
  -1   0  -2 7510.80 120.761   1
   1   0   3 7222.28 128.780   1
  -1   0  -3 6825.15 159.937   4
  -1   0  -3 6807.06 120.408   1
   1   0   3 7001.39 161.044   4
  -1   0  -4 3087.98 68.0075   5
   1   0   4 3018.14 88.8584   1
  -1   0  -4 3003.38 87.3122   1
  -1   0  -4 3008.90 110.778   4
   1   0   4 2938.92 111.676   4
   1   0   5 9769.75 216.654   4
  -1   0  -5 9583.03 166.430   1
   1   0   5 10021.0 174.249   1
   1   0   5 9586.50 165.348   2
  -1   0  -5 9603.24 116.288   5
  -1   0  -6 548.365 28.2075   5
   1   0   6 495.473 41.3097   2
  -1   0  -6 536.745 43.9250   1
   1   0   6 515.036 53.5347   4
   1   0   6 513.227 43.8808   1
   1   0   7 407.543 41.6145   2
   1   0   7 473.631 54.9476   4
   1   0   7 462.292 45.2682   1
   1   0   8 297.764 38.7949   1
   1   0   8 297.832 45.5200   4
   1   0   8 301.554 39.5185   2
   1   0   9 771.189 74.9599   4
   1   0   9 808.779 66.1371   1
   1   0   9 804.420 67.0274   2
   1   0  10 2289.78 115.854   1
   1   0  10 2057.44 113.195   2
   1   0  10 2030.73 128.824   4
   1   0  11 162.718 40.0390   4
   1   0  11 142.298 32.0616   2
   1   0  11 96.4314 33.1975   3
   1   0  11 162.873 33.5701   1
   1   0  12 1318.24 140.091   3
   1   0  12 1346.20 104.317   2
   1   0  12 1401.83 116.489   4
   1   0  12 1345.40 98.9338   1
   1   0  13 11.9612 15.3596   2
   1   0  13 20.9879 16.0689   1
   1   0  13-23.6537 24.4885   4
   1   0  13 27.8916 30.4670   3
   1   0  14 160.833 45.7847   2
   1   0  14 92.9235 27.4847   1
   1   0  14 96.5865 41.5175   3
   1   0  14 135.363 42.7929   4
   1   0  15 35.9025 27.5557   4
   1   0  15 38.5672 28.3019   3
   1   0  15 14.4640 16.2257   2
   1   0  15 9.46158 20.5477   1
   1   0  16 405.568 73.4623   4
   1   0  16 333.989 58.5236   1
   1   0  16 464.953 98.1689   3
   1   0  17 7.07726 17.6345   4
   1   0  17-49.3838 45.1865   3
   1   0  17-0.38195 21.8349   1
   1   0  18 20.0905 22.9219   1
   1   0  19 70.3944 37.3942   1
   1   0  20-35.4916 27.6720   1
   1   0  21 74.9756 43.2072   1
   1   0  22 14.0856 22.0168   1
  -1  -1  24 0.78884 28.6159   1
  -1  -1  23 29.4474 60.5492   1
  -1  -1  22-8.82297 28.7904   1
  -1  -1  21 54.1988 31.1979   1
  -1  -1  20-23.2025 25.2422   1
  -1  -1  19 88.8240 36.8290   1
   1   1 -19 40.9435 26.3318   2
  -1  -1  19 46.4167 18.6938   5
  -1  -1  18 31.6969 16.0939   5
   1   1 -18 24.1660 19.3976   2
  -1  -1  18 53.7953 26.5151   1
  -1  -1  17 150.792 45.7494   1
   1   1 -17 143.028 38.7368   2
  -1  -1  17 137.208 26.3254   5
  -1  -1  17 74.3239 25.0294   4
  -1  -1  16 35.6482 15.8353   4
   1   1 -16 46.3333 22.8984   2
  -1  -1  16 29.5962 14.1871   5
  -1  -1  15 6.64315 26.9610   3
  -1  -1  15-6.49445 22.8161   2
   1   1 -15 9.23315 17.9698   2
  -1  -1  15 6.57008 11.9573   4
   1   1 -14 134.790 34.4964   2
  -1  -1  14 137.800 47.6040   3
  -1  -1  14 126.343 41.0804   2
  -1  -1  14 117.326 26.6172   4
  -1  -1  13 0.67304 9.28418   4
  -1  -1  13 44.8565 27.0247   3
  -1  -1  13 46.7840 28.9996   2
   1   1 -13 26.0752 20.2067   2
   1   1 -12 356.445 50.2250   2
  -1  -1  12 330.565 39.5113   4
  -1  -1  12 336.730 58.0125   2
  -1  -1  12 374.595 65.6441   3
   1   1 -11 41.1670 19.9374   2
  -1  -1  11 44.2777 27.4065   2
  -1  -1  11 32.8895 16.5980   3
  -1  -1  11 43.6311 13.6287   4
   1   1 -10 1931.84 109.139   2
  -1  -1  10 1666.39 77.6911   4
  -1  -1  10 1764.12 121.526   3
  -1  -1  10 1879.06 123.989   2
  -1  -1   9 5171.94 195.249   2
  -1  -1   9 4867.56 122.611   4
  -1  -1   9 5313.25 197.168   3
   1   1  -9 5154.41 171.967   2
   1   1  -8 440.242 48.5141   2
  -1  -1   8 361.129 48.5373   3
  -1  -1   8 446.475 55.5927   2
  -1  -1   8 411.706 31.7490   4
  -1  -1   7 888.263 73.3892   2
  -1  -1   7 912.876 40.5217   4
   1   1  -7 1053.19 70.4216   2
  -1  -1   7 1058.32 75.4466   3
  -1  -1   6 1983.93 101.814   2
  -1  -1   6 1959.19 90.8696   3
   1   1  -6 2014.97 95.2349   2
  -1  -1   6 1980.66 48.9632   4
   1   1  -5 1172.88 69.5812   2
  -1  -1   5 1133.76 72.5372   2
  -1  -1   5 1129.93 60.1513   3
   1   1  -4 826.015 56.5801   2
  -1  -1   4 834.490 42.5846   3
  -1  -1   4 755.167 55.7953   2
   1   1  -3 911.225 55.7764   2
  -1  -1  -1 3252.17 98.4908   3
   1   1   1 3418.65 100.035   3
   1   1   1 3481.44 92.2388   1
   1   1   1 3403.33 96.0818   4
   1   1   2 5373.43 133.139   4
  -1  -1  -2 5301.04 145.600   3
  -1  -1  -2 5050.32 110.362   1
   1   1   2 5413.17 119.104   1
   1   1   3 962.098 52.7371   1
   1   1   3 867.012 58.1793   4
  -1  -1  -3 903.014 50.5655   1
  -1  -1  -3 861.865 66.8601   3
   1   1   4 773.177 59.1351   4
   1   1   4 812.571 53.7494   1
  -1  -1  -4 707.652 65.6904   3
  -1  -1  -4 793.641 29.3919   5
  -1  -1  -4 767.105 49.7594   1
  -1  -1  -5 67.3711 25.4727   3
   1   1   5 54.0333 18.6750   4
  -1  -1  -5 53.8857 15.7171   1
   1   1   5 57.5680 16.3715   2
  -1  -1  -5 56.9325 7.41830   5
   1   1   5 53.6792 18.3515   1
   1   1   6 231.799 38.6957   4
  -1  -1  -6 204.933 30.6884   1
   1   1   6 189.586 28.9040   2
   1   1   6 214.591 31.3109   1
   1   1   7 2048.05 101.478   1
   1   1   7 1972.01 115.782   4
   1   1   7 2044.22 98.8104   2
   1   1   8 5697.76 203.663   4
   1   1   8 5726.82 175.301   2
   1   1   8 6163.70 182.978   1
   1   1   9 559.470 58.2430   2
   1   1   9 523.948 57.4172   1
   1   1   9 536.622 64.7954   4
   1   1  10 0.50646 16.8272   2
   1   1  10-5.13638 17.4010   4
   1   1  10 13.6761 14.3962   1
   1   1  11 364.400 73.6130   3
   1   1  11 331.140 50.5313   1
   1   1  11 342.982 60.3451   4
   1   1  11 329.196 51.7372   2
   1   1  12 23.2123 18.5801   1
   1   1  12 42.8792 34.1778   3
   1   1  12 17.7058 19.7870   4
   1   1  12 31.9410 20.8772   2
   1   1  13-19.6177 26.6661   4
   1   1  13 20.0700 21.5114   1
   1   1  13 59.6562 41.5952   3
   1   1  13 10.9096 16.3565   2
   1   1  14 6.71288 23.8423   4
   1   1  14 33.5340 24.9224   1
   1   1  14 17.1818 38.8892   3
   1   1  14-2.35378 13.5032   2
   1   1  15 278.308 62.1570   4
   1   1  15 259.948 50.0622   1
   1   1  16 15.7517 19.9371   1
   1   1  16 5.13958 18.2496   4
   1   1  17 43.0742 28.0688   1
   1   1  18 123.126 39.3592   1
   1   1  19 68.5907 34.4925   1
   1   1  20 61.7433 36.2234   1
   1   1  21 51.7141 34.9479   1
   1   1  22 6.81157 21.9544   1
  -1  -2  24 26.2128 30.3425   1
  -1  -2  23 24.5643 32.3889   1
  -1  -2  22-19.7838 28.7353   1
  -1  -2  21-19.3622 20.0878   1
   1   2 -20 41.7058 24.2970   2
  -1  -2  20 55.5434 31.4575   1
  -1  -2  19 13.2403 12.0223   5
   1   2 -19 49.6859 25.6592   2
  -1  -2  19-7.63476 24.8415   1
   1   2 -18 45.4564 20.7210   2
  -1  -2  18 73.4758 34.1485   1
  -1  -2  18 71.3442 22.5762   5
  -1  -2  18 73.5702 28.2785   4
   1   2 -17 1059.87 100.539   2
  -1  -2  17 1027.40 84.7016   4
  -1  -2  17 1097.81 77.9764   5
  -1  -2  17 919.417 120.942   3
   1   2 -16 2239.80 141.077   2
  -1  -2  16 2114.42 117.498   4
  -1  -2  16 2122.62 170.936   2
  -1  -2  16 2257.84 181.579   3
  -1  -2  16 2169.25 107.198   5
   1   2 -15 368.617 57.4598   2
  -1  -2  15 399.307 49.0304   4
  -1  -2  15 386.859 74.0346   3
  -1  -2  15 343.100 67.3081   2
  -1  -2  14 17.1924 15.3899   2
   1   2 -14 7.65897 14.4197   2
  -1  -2  14 29.5949 15.3989   4
  -1  -2  14 39.0160 20.9907   3
  -1  -2  13 137.999 37.9700   2
  -1  -2  13 136.600 42.8206   3
   1   2 -13 145.814 34.6559   2
  -1  -2  13 102.464 22.7863   4
   1   2 -12 201.327 37.2381   2
  -1  -2  12 169.915 27.4190   4
  -1  -2  12 156.292 43.3743   3
  -1  -2  12 154.470 42.2099   2
  -1  -2  11 32.4121 14.3067   4
  -1  -2  11 44.1270 25.7686   3
  -1  -2  11 11.3321 15.3567   2
   1   2 -11 27.4802 18.7731   2
  -1  -2  10 32.9241 13.1764   4
   1   2 -10 49.7599 23.0277   2
  -1  -2  10 29.0769 17.5370   2
  -1  -2  10 53.7734 24.8630   3
  -1  -2   9 1115.75 90.0172   2
   1   2  -9 1243.44 82.8181   2
  -1  -2   9 1163.60 89.2775   3
  -1  -2   9 1204.19 52.9427   4
   1   2  -8 69.1335 23.0357   2
  -1  -2   8 52.3623 10.4533   4
  -1  -2   8 35.2658 18.5200   3
  -1  -2   8 47.7301 23.8176   2
  -1  -2   7 115.316 24.4109   3
   1   2  -7 132.964 30.2124   2
  -1  -2   7 145.020 30.9467   2
   1   2  -6 2023.22 96.5465   2
  -1  -2   6 1805.97 96.3545   2
   1   2  -5 3497.68 120.675   2
  -1  -2   5 3109.76 119.314   2
   1   2  -4 732.679 52.7514   2
  -1  -2   4 766.329 56.6564   2
  -1  -2   3 13674.5 208.705   1
   1   2  -3 14592.5 230.732   2
   1   2  -2 11397.6 179.318   1
   1   2  -1 2919.34 91.7851   1
   1   2   0 76.5211 16.8742   1
   1   2   1 207.452 25.8270   1
  -1  -2  -1 235.588 31.5027   3
   1   2   2 5418.40 130.162   1
  -1  -2  -2 5383.72 161.678   3
  -1  -2  -3 68.8717 17.2533   1
  -1  -2  -3 89.1332 26.1007   3
   1   2   3 69.7143 16.9186   1
  -1  -2  -4 281.379 45.3133   3
   1   2   4 349.892 40.2254   1
  -1  -2  -4 304.387 34.4009   1
   1   2   5 274.027 35.8326   2
   1   2   5 311.447 39.7548   1
  -1  -2  -5 319.599 53.6017   3
  -1  -2  -5 319.770 38.3018   1
  -1  -2  -6 4810.80 152.483   1
   1   2   6 5081.69 159.779   1
   1   2   6 4805.42 152.598   2
  -1  -2  -6 4770.10 209.668   3
   1   2   7 3577.97 141.715   1
   1   2   7 3347.83 155.115   4
  -1  -2  -7 3506.60 191.393   3
   1   2   7 3467.31 137.222   2
  -1  -2  -8 1001.65 112.111   3
   1   2   8 960.010 77.6694   2
   1   2   8 912.094 85.8836   4
   1   2   8 1055.73 82.5373   1
   1   2   9 1155.71 89.4556   2
   1   2   9 1114.85 86.5455   1
   1   2   9 1004.14 93.0420   4
   1   2  10 1169.99 127.529   3
   1   2  10 959.901 95.4233   4
   1   2  10 1044.44 87.2029   1
   1   2  10 986.786 87.0498   2
   1   2  11 369.443 57.8218   2
   1   2  11 320.635 53.5436   1
   1   2  11 315.473 55.7270   4
   1   2  12 1027.85 96.2571   1
   1   2  12 937.066 94.4615   2
   1   2  12 956.355 103.635   4
   1   2  13 110.595 38.3672   2
   1   2  13 136.757 44.8161   4
   1   2  13 147.876 41.0619   1
   1   2  14 81.6649 34.3592   4
   1   2  14 71.2020 28.6717   1
   1   2  15 10.2655 21.7915   4
   1   2  15 20.8974 20.0481   1
   1   2  16 94.7923 38.3723   1
   1   2  17 10.0979 19.4254   1
   1   2  18-43.6997 27.3325   1
   1   2  19 87.8873 37.4328   1
   1   2  20 21.9883 30.9281   1
   1   2  21 107.271 45.1755   1
   1   2  22-39.9393 35.0090   1
  -1  -3  23 25.0803 26.4326   1
  -1  -3  22-15.5194 20.7947   1
   1   3 -21 22.4116 21.2163   2
  -1  -3  21 19.7955 19.1289   1
  -1  -3  20 126.967 40.4661   1
  -1  -3  20 79.0238 48.8301   3
  -1  -3  20 54.2533 17.0774   5
   1   3 -20 54.9918 26.0046   2
  -1  -3  19 6.69580 8.80558   5
  -1  -3  19 34.7580 28.6014   3
  -1  -3  19 10.5795 24.2858   1
   1   3 -19 31.9245 26.4641   2
  -1  -3  18 63.7312 22.3558   4
   1   3 -18 102.172 32.6181   2
  -1  -3  18 144.318 43.3182   1
  -1  -3  18 117.310 29.5088   5
  -1  -3  18 104.168 47.6465   3
  -1  -3  17-9.04531 27.8889   3
   1   3 -17-0.55300 18.1898   2
  -1  -3  17-4.57284 11.8103   5
  -1  -3  17 7.24698 14.9200   4
  -1  -3  17-38.1135 30.5690   2
  -1  -3  16 6.79088 8.99874   5
  -1  -3  16-4.15024 24.9878   3
   1   3 -16 10.3850 15.4304   2
  -1  -3  16 30.2318 14.6393   4
  -1  -3  16 62.1450 34.5114   2
   1   3 -15 396.526 56.9785   2
  -1  -3  15 426.340 75.6453   3
  -1  -3  15 389.772 69.8356   2
  -1  -3  15 420.374 46.9628   4
  -1  -3  14 702.318 88.6022   2
  -1  -3  14 643.216 54.6298   4
  -1  -3  14 651.007 92.1902   3
   1   3 -14 700.599 72.5913   2
   1   3 -13 12.8711 15.0109   2
  -1  -3  13 38.0369 21.0449   3
  -1  -3  13 25.8712 11.8680   4
  -1  -3  13 26.7407 22.4890   2
  -1  -3  12 165.018 43.3912   3
   1   3 -12 76.8080 25.3662   2
  -1  -3  12 115.065 19.9989   4
  -1  -3  12 103.332 33.4417   2
  -1  -3  11 48.0285 24.3402   3
  -1  -3  11 50.5563 13.5795   4
   1   3 -11 30.8197 19.5218   2
  -1  -3  11 44.7528 23.0378   2
  -1  -3  10 0.16984 5.49180   4
  -1  -3  10-1.64704 19.9207   3
  -1  -3  10-0.18044 21.9436   2
   1   3 -10 1.19370 15.5147   2
  -1  -3   9 398.300 53.1794   2
   1   3  -9 369.078 46.8468   2
  -1  -3   9 423.095 27.2430   4
  -1  -3   8 560.089 26.5652   4
   1   3  -8 522.008 52.4994   2
  -1  -3   8 550.960 59.5851   2
   1   3  -7 342.965 42.2543   2
  -1  -3   7 369.146 46.5309   2
   1   3  -6 817.938 63.5083   2
  -1  -3   6 827.975 65.7242   2
  -1  -3   5 1402.92 82.1544   2
   1   3  -5 1464.98 79.2359   2
   1   3  -4 5162.57 149.352   2
  -1  -3   4 5143.57 131.847   1
  -1  -3   3 3462.16 104.290   1
   1   3  -3 3623.52 108.542   1
  -1  -3   2 34998.2 327.543   1
   1   3  -2 34883.5 334.860   1
   1   3  -1 150.819 24.0246   1
   1   3   0 15731.1 226.737   1
   1   3   1 1933.33 82.2395   1
   1   3   2 567.106 47.5666   1
  -1  -3  -2 612.354 60.4246   3
   1   3   3 17.9690 21.6185   1
  -1  -3  -3 6.61080 9.70547   1
  -1  -3  -3-4.75348 12.8270   3
  -1  -3  -4 56.4131 18.3169   1
  -1  -3  -4 60.2433 24.8366   3
   1   3   4 50.6541 18.2597   1
  -1  -3  -5 240.890 49.9099   3
  -1  -3  -5 130.826 26.2261   1
   1   3   5 134.214 27.5706   2
   1   3   5 153.028 32.5603   1
  -1  -3  -6 2419.91 159.033   3
   1   3   6 2736.50 122.693   2
   1   3   6 2557.73 121.066   1
  -1  -3  -6 2408.63 117.159   1
  -1  -3  -7 31.2600 20.2684   3
   1   3   7 0.74650 16.8593   2
   1   3   7 11.2715 13.8953   1
  -1  -3  -8 324.071 67.3818   3
   1   3   8 319.765 47.7830   1
   1   3   8 342.319 48.5792   2
  -1  -3  -9 29.9017 27.5998   3
   1   3   9 64.9862 29.4607   1
   1   3   9 13.6558 12.5597   2
   1   3  10-2.27090 15.4808   2
  -1  -3 -10-5.46331 17.7378   3
   1   3  10 1.98271 13.2138   4
   1   3  10 8.63877 16.2936   1
   1   3  11 5.25899 19.3365   4
   1   3  11 13.8737 21.3781   1
   1   3  11-4.34870 16.3538   2
   1   3  12 1837.55 134.700   1
   1   3  12 1731.77 133.453   2
   1   3  12 1826.69 145.613   4
   1   3  13 11.9924 22.5273   4
   1   3  13 0.24757 22.2827   1
   1   3  14-20.3953 26.6568   1
   1   3  14 47.1663 33.5281   4
   1   3  15-19.1269 17.3073   1
   1   3  16 68.9846 41.7197   1
   1   3  17 7.83293 20.1972   1
   1   3  18 62.9205 41.3714   1
   1   3  19 39.2684 34.1610   1
   1   3  20 122.557 48.4927   1
   1   3  21-40.8961 32.7131   1
  -1  -4  23 14.2285 18.0224   1
   1   4 -22-11.6714 21.8630   2
  -1  -4  22-2.35284 17.5756   1
  -1  -4  21 17.3579 25.7447   3
   1   4 -21 13.2822 18.6709   2
  -1  -4  21-21.0712 26.9097   1
  -1  -4  21 3.98182 12.0845   5
  -1  -4  20 212.931 45.4139   1
  -1  -4  20 164.047 62.3053   3
   1   4 -20 167.571 43.6610   2
  -1  -4  20 183.481 36.4567   5
   1   4 -19 6.51629 22.4149   2
  -1  -4  19-7.68281 20.8023   3
  -1  -4  19 50.3344 28.6182   1
  -1  -4  19-12.1142 16.5670   5
  -1  -4  18 29.5793 24.3920   3
   1   4 -18 34.9720 22.6462   2
  -1  -4  18-18.8937 32.9089   2
  -1  -4  18 23.8999 16.4033   5
  -1  -4  18 7.33308 10.5507   4
  -1  -4  17 95.2702 39.9572   3
   1   4 -17 113.092 31.7733   2
  -1  -4  17 141.742 31.5982   5
  -1  -4  17 95.8096 21.7628   4
  -1  -4  17 220.280 54.0698   2
  -1  -4  16 618.487 90.2066   3
   1   4 -16 647.298 73.1538   2
  -1  -4  16 619.344 54.5480   4
  -1  -4  16 728.208 68.0955   5
  -1  -4  16 569.420 83.9444   2
  -1  -4  15 2788.49 188.164   3
   1   4 -15 2895.74 149.711   2
  -1  -4  15 2989.90 112.713   4
  -1  -4  15 2869.33 179.312   2
  -1  -4  14 862.008 100.112   3
   1   4 -14 850.441 79.1190   2
  -1  -4  14 781.931 91.9971   2
  -1  -4  14 772.167 53.8478   4
   1   4 -13 1950.89 113.837   2
  -1  -4  13 1668.65 74.5112   4
  -1  -4  13 1839.95 137.408   3
  -1  -4  13 1558.67 121.502   2
  -1  -4  12 198.641 44.1764   2
  -1  -4  12 169.056 22.5136   4
   1   4 -12 197.548 38.0468   2
  -1  -4  12 138.255 38.3003   3
  -1  -4  11 13.9300 15.2215   2
   1   4 -11-18.2897 20.0172   2
  -1  -4  11 6.96151 7.56745   4
  -1  -4  10-4.76996 12.8137   2
   1   4 -10-1.77296 17.3067   2
  -1  -4  10 12.6900 6.36432   4
   1   4  -9 2482.84 68.3405   4
  -1  -4   9 2341.31 127.848   2
   1   4  -9 2460.57 118.520   2
   1   4  -8 584.337 32.1344   4
   1   4  -8 606.061 58.9857   2
  -1  -4   8 585.457 61.2627   2
  -1  -4   7 110.522 26.7950   2
   1   4  -7 101.087 22.1430   2
   1   4  -7 97.5638 13.6562   4
   1   4  -6 206.948 33.8214   2
  -1  -4   6 207.927 29.4771   1
   1   4  -5-0.52727 14.7719   2
  -1  -4   5 23.4546 11.7420   1
   1   4  -4 5904.19 147.364   1
  -1  -4   4 5939.91 145.352   1
  -1  -4   3 772.733 52.1278   1
   1   4  -3 862.163 56.8025   1
  -1  -4   2 4147.19 116.167   1
   1   4  -2 4060.98 121.011   1
  -1  -4   1 159.168 24.0805   1
   1   4  -1 142.369 22.8693   1
   1   4   0 547.632 47.5929   1
   1   4   1 859.455 59.2590   1
   1   4   2 636.032 54.7879   1
  -1  -4  -3 2718.01 145.617   3
  -1  -4  -3 2744.81 56.3466   5
   1   4   3 2769.91 115.746   1
  -1  -4  -4-7.05915 15.8343   3
   1   4   4-4.28587 12.6823   1
   1   4   5 461.037 52.7825   1
  -1  -4  -5 506.167 69.9916   3
   1   4   6 341.510 49.3173   1
   1   4   6 280.540 43.3686   2
  -1  -4  -6 361.400 64.5430   3
   1   4   7 1890.40 114.564   2
  -1  -4  -7 1907.48 154.043   3
   1   4   7 1876.05 113.557   1
   1   4   8 43.8680 25.0646   1
  -1  -4  -8 129.436 43.6704   3
   1   4   8 66.7965 28.0248   2
   1   4   9 488.011 63.6825   1
   1   4   9 614.091 72.5117   2
  -1  -4  -9 621.912 97.2833   3
   1   4  10-9.56753 20.9510   1
  -1  -4 -10-4.81498 21.4321   3
   1   4  10 48.0882 25.4065   2
   1   4  11 162.213 41.0395   2
   1   4  11 190.689 50.7440   4
   1   4  11 152.018 41.9189   1
   1   4  12 15.8624 18.8638   4
   1   4  12 24.6445 26.5637   1
   1   4  13 32.3389 29.0933   1
   1   4  14 59.9085 34.5483   1
   1   4  15-65.2431 31.9774   1
   1   4  16-22.4660 22.6592   1
   1   4  17 129.967 43.9685   1
   1   4  18 61.2631 39.1348   1
   1   4  19 38.8910 38.4334   1
   1   4  20 19.3147 36.0981   1
   1   4  21 26.5755 35.4657   1
  -1  -5  23 73.9517 48.3062   3
  -1  -5  23-19.3726 19.0240   1
  -1  -5  22 3.10203 27.1384   3
  -1  -5  22 20.2175 17.1616   1
   1   5 -22 1.87162 18.9692   2
  -1  -5  22-13.5936 19.7859   5
   1   5 -21 38.7677 29.0876   2
  -1  -5  21 9.20647 19.4247   1
  -1  -5  21-18.7686 28.8344   3
  -1  -5  21 23.4548 17.7286   5
   1   5 -20-5.10295 18.0438   2
  -1  -5  20 8.27260 35.3273   3
  -1  -5  20-6.61486 14.1544   1
  -1  -5  20 19.1145 20.0046   5
  -1  -5  19 73.0187 36.2798   2
  -1  -5  19 98.3423 45.3806   3
   1   5 -19 142.098 36.8434   2
  -1  -5  19 109.544 34.1613   5
  -1  -5  18-9.39485 17.2320   2
   1   5 -18-4.44091 16.9699   2
  -1  -5  18 22.7050 11.7192   4
  -1  -5  18 10.5703 29.3228   3
  -1  -5  18 11.6465 17.2455   5
  -1  -5  17 177.252 48.8109   2
   1   5 -17 256.307 48.3064   2
  -1  -5  17 197.275 35.7236   5
  -1  -5  17 243.220 33.7562   4
  -1  -5  17 132.005 41.8647   3
  -1  -5  16 1561.47 79.1408   4
  -1  -5  16 1491.78 140.964   3
   1   5 -16 1630.40 111.890   2
  -1  -5  16 1556.78 102.370   5
  -1  -5  16 1575.27 135.641   2
  -1  -5  15-6.86828 25.0520   3
  -1  -5  15 44.3977 26.4531   2
  -1  -5  15-0.31424 10.5360   4
  -1  -5  15 7.77505 13.6292   5
   1   5 -15 1.42685 15.7647   2
  -1  -5  14 228.719 49.5235   2
  -1  -5  14 192.910 48.4241   3
   1   5 -14 204.454 40.3846   2
  -1  -5  14 228.444 27.9601   4
  -1  -5  13 45.5452 27.9961   2
  -1  -5  13-6.81113 10.0355   4
   1   5 -13-17.7669 11.5036   2
   1   5 -12 291.761 42.6936   2
  -1  -5  12 248.646 25.0762   4
  -1  -5  12 265.415 47.0282   2
   1   5 -11 2597.15 126.550   2
   1   5 -11 2530.17 82.2039   4
  -1  -5  11 2591.35 143.885   2
   1   5 -10 25.9815 10.6935   4
  -1  -5  10 19.1611 20.2062   2
   1   5 -10 39.7193 19.2707   2
   1   5  -9 209.236 36.6018   2
   1   5  -9 223.451 24.3297   4
  -1  -5   9 225.195 41.1141   2
  -1  -5   8 3861.72 157.431   2
   1   5  -8 3912.75 147.083   2
   1   5  -8 4049.32 98.9539   4
  -1  -5   7 906.775 63.1942   1
   1   5  -7 977.224 73.3754   2
   1   5  -7 983.083 47.7844   4
  -1  -5   6 3233.14 113.596   1
   1   5  -6 3451.85 137.095   2
   1   5  -5 36.9916 16.7010   1
  -1  -5   5 19.3139 13.7236   1
  -1  -5   4 3101.13 106.010   1
   1   5  -4 3189.48 113.363   1
  -1  -5   3 3177.32 106.907   1
   1   5  -3 3186.72 114.927   1
  -1  -5   2 1113.85 64.8656   1
   1   5  -2 1111.28 69.5000   1
  -1  -5   1 40.4220 16.7192   1
   1   5  -1 15.7840 14.5049   1
  -1  -5   0 92.4439 20.1835   1
   1   5   0 140.923 29.2436   1
   1   5   1 682.804 58.1114   1
  -1  -5  -2 5253.37 100.642   5
   1   5   2 5368.97 166.205   1
  -1  -5  -3 140.981 14.9091   5
  -1  -5  -3 128.368 38.0094   3
   1   5   3 136.117 32.6851   1
   1   5   4 69.7082 26.9628   1
  -1  -5  -4 60.4556 9.08186   5
  -1  -5  -4 67.5284 31.1807   3
  -1  -5  -5 1414.96 124.007   3
   1   5   5 1333.45 96.2246   1
  -1  -5  -6 389.571 70.4146   3
   1   5   6 368.812 51.0629   2
   1   5   6 353.975 53.0998   1
   1   5   7 23.3786 22.4441   1
   1   5   7-0.37514 13.1997   2
  -1  -5  -7-39.1322 34.4548   3
  -1  -5  -8 97.9125 41.9602   3
   1   5   8 116.793 36.2421   1
   1   5   8 91.4710 31.7713   2
  -1  -5  -9 18.0049 29.1018   3
   1   5   9 10.0259 22.9468   1
   1   5   9 25.9487 19.6884   2
   1   5  10 1373.94 117.748   2
   1   5  10 1261.09 111.801   1
   1   5  11 67.7449 27.2714   1
   1   5  12 216.859 54.9099   1
   1   5  13-1.02377 19.4935   1
   1   5  14-8.46155 19.6866   1
   1   5  15-9.36873 22.2325   1
   1   5  16-1.96871 29.4414   1
   1   5  17 31.1770 22.1058   1
   1   5  18 25.4677 30.4795   1
   1   5  19 58.3462 43.4240   1
   1   5  20 29.4600 43.7474   1
  -1  -6  25-31.7704 39.9460   3
  -1  -6  24 26.3215 44.5280   3
   1   6 -23 60.2654 24.6338   2
  -1  -6  23 18.6534 23.7266   3
  -1  -6  23 52.3556 30.3664   1
  -1  -6  22 31.5622 27.9326   1
   1   6 -22 4.13472 15.6344   2
  -1  -6  22 45.8312 23.2106   5
  -1  -6  22-28.7805 32.7096   3
  -1  -6  21 0.11133 12.7718   5
   1   6 -21-1.77691 17.6058   2
  -1  -6  21 4.17296 16.0932   1
  -1  -6  21 8.23796 24.0357   3
   1   6 -20 100.545 29.4364   2
  -1  -6  20 42.3164 26.9268   3
  -1  -6  20 58.7045 22.6450   5
  -1  -6  20 95.4089 33.5890   1
  -1  -6  19 331.787 54.5511   5
  -1  -6  19 308.814 69.4174   2
   1   6 -19 336.782 55.5381   2
  -1  -6  19 308.390 73.6337   3
  -1  -6  18 1816.56 168.001   3
  -1  -6  18 1727.66 152.243   2
  -1  -6  18 1920.79 123.237   5
  -1  -6  18 1938.18 88.1603   4
   1   6 -18 2131.49 131.692   2
  -1  -6  17 2187.97 178.023   3
   1   6 -17 2133.15 128.583   2
  -1  -6  17 1837.04 150.193   2
  -1  -6  17 2097.99 126.053   5
  -1  -6  17 2094.38 89.2775   4
  -1  -6  16 163.790 41.4213   3
  -1  -6  16 176.959 38.0008   5
  -1  -6  16 108.822 33.2098   2
  -1  -6  16 105.450 18.3721   4
   1   6 -16 109.685 32.0905   2
   1   6 -15 426.938 55.1419   2
  -1  -6  15 328.370 57.9248   2
  -1  -6  15 446.801 56.0929   5
  -1  -6  14 408.371 66.3761   2
   1   6 -14 335.658 49.0291   2
  -1  -6  13 27.3255 25.7415   2
   1   6 -13 4.96517 6.57987   4
   1   6 -13 2.90431 15.9866   2
   1   6 -12 1354.13 93.1010   2
   1   6 -12 1155.03 62.0799   4
  -1  -6  12 1177.63 100.294   2
  -1  -6  11 83.5697 31.0148   2
   1   6 -11 102.344 25.1488   2
   1   6 -11 88.5028 19.1199   4
   1   6 -10 190.758 25.3113   4
  -1  -6  10 177.485 38.8178   2
   1   6 -10 150.886 30.3599   2
   1   6  -9 643.547 46.5397   4
   1   6  -9 589.665 61.1848   2
  -1  -6   9 558.585 53.2689   1
  -1  -6   8 1090.40 72.7114   1
   1   6  -8 1227.84 61.1865   4
   1   6  -8 1271.38 88.3180   2
   1   6  -7 2995.60 134.634   2
  -1  -6   7 3034.71 114.848   1
  -1  -6   6 1184.08 72.5121   1
   1   6  -6 1272.44 76.2794   1
   1   6  -5 8.70940 15.7357   1
  -1  -6   5-25.8598 17.3039   1
   1   6  -4 423.744 44.5647   1
  -1  -6   4 366.733 38.6024   1
  -1  -6   3 920.906 59.6369   1
   1   6  -3 881.745 64.4477   1
   1   6  -2 1445.72 84.0785   1
  -1  -6   2 1510.08 79.0470   1
  -1  -6   1 35.2944 15.8440   1
   1   6  -1 20.8089 17.3701   1
   1   6   0 3389.96 131.929   1
  -1  -6   0 3637.51 102.759   5
  -1  -6  -1 994.203 51.2418   5
   1   6   1 897.558 70.4617   1
  -1  -6  -2 1742.31 64.9902   5
   1   6   2 1750.70 101.402   1
  -1  -6  -3 5507.57 107.999   5
   1   6   3 5495.70 186.562   1
  -1  -6  -4 6.84941 5.64788   5
   1   6   4-12.1600 16.1929   1
  -1  -6  -4 14.6508 24.2461   3
  -1  -6  -5 131.090 43.7700   3
   1   6   5 124.339 33.1113   1
   1   6   6 475.261 61.3718   2
  -1  -6  -6 546.553 82.5995   3
   1   6   6 544.012 67.3227   1
   1   6   7 101.902 30.8983   2
   1   6   7 161.298 37.5465   1
  -1  -6  -7 83.2694 38.0872   3
   1   6   8 468.250 67.8519   1
   1   6   8 475.457 66.2565   2
  -1  -6  -8 550.956 93.4997   3
   1   6   9 133.159 40.1718   1
   1   6  10 1074.65 106.903   1
   1   6  11 53.4785 33.1778   1
   1   6  12-21.2317 26.8578   1
   1   6  13 221.372 54.7917   1
   1   6  14 55.1563 33.6991   1
   1   6  15 104.036 45.2913   1
   1   6  16 68.5280 39.2052   1
   1   6  17 5.15245 25.1197   1
   1   6  18 51.5376 31.4423   1
   1   6  19 40.0123 46.3975   1
  -1  -7  26 0.32230 38.2733   3
  -1  -7  25 121.128 76.1171   3
  -1  -7  24-13.3409 24.0462   3
   1   7 -23 41.4198 25.5065   2
  -1  -7  23 6.56686 15.1612   5
  -1  -7  23-16.2110 24.3865   3
  -1  -7  22-10.1956 28.6665   3
  -1  -7  22 4.64493 12.2670   1
   1   7 -22-5.88717 13.0489   2
  -1  -7  22 48.5006 25.0953   5
  -1  -7  21 30.3659 21.2910   1
  -1  -7  21 25.5827 31.3960   3
   1   7 -21 28.5023 19.8139   2
  -1  -7  21 18.1903 18.9882   5
  -1  -7  20 50.3823 32.5584   2
  -1  -7  20 84.5875 41.0858   3
   1   7 -20 27.1949 23.7549   2
  -1  -7  20 35.4494 22.2255   5
  -1  -7  19 13.9430 20.1188   5
  -1  -7  19 52.5345 35.9149   2
  -1  -7  19 6.86433 22.5903   3
   1   7 -19 11.6178 13.8402   2
  -1  -7  18 325.891 53.3761   5
   1   7 -18 393.160 56.8524   2
  -1  -7  18 328.676 71.6959   3
  -1  -7  18 388.041 70.1097   2
   1   7 -17 61.6111 25.8435   2
  -1  -7  17 96.7724 34.6093   5
  -1  -7  17 80.9608 44.7104   3
  -1  -7  17 53.5386 27.1472   2
  -1  -7  16 233.813 44.8924   5
   1   7 -16 208.567 38.7233   2
  -1  -7  16 260.726 53.9961   2
  -1  -7  15 472.048 68.9581   2
  -1  -7  15 556.898 64.7609   5
   1   7 -15 428.627 54.5143   2
   1   7 -15 490.075 43.0963   4
  -1  -7  14 235.802 50.1475   2
  -1  -7  14 207.348 40.0301   5
   1   7 -14 165.630 34.9361   2
   1   7 -14 154.236 24.6425   4
  -1  -7  13 337.453 55.5695   2
   1   7 -13 345.653 49.5912   2
   1   7 -13 293.556 34.2883   4
   1   7 -12 11.1740 11.7465   4
  -1  -7  12 20.9882 13.8902   1
   1   7 -12-8.98714 13.1866   2
   1   7 -11 153.472 25.2469   4
  -1  -7  11 170.904 31.8588   1
   1   7 -11 136.254 31.1509   2
  -1  -7  10 321.022 42.4078   1
   1   7 -10 270.835 33.3326   4
   1   7 -10 292.251 45.4264   2
   1   7  -9 644.377 65.5342   2
  -1  -7   9 664.298 57.0989   1
   1   7  -9 692.574 51.9075   4
  -1  -7   8 1829.63 93.6173   1
   1   7  -8 1885.91 112.851   2
   1   7  -7 2004.37 101.181   1
  -1  -7   7 2038.10 95.2030   1
   1   7  -6 1446.77 86.4999   1
  -1  -7   6 1407.00 78.0491   1
   1   7  -5 251.624 37.1510   1
  -1  -7   5 238.559 32.0604   1
   1   7  -4 41.9175 17.7229   1
  -1  -7   4 31.3686 13.8507   1
   1   7  -3 4697.43 156.188   1
  -1  -7   3 4441.10 139.747   1
   1   7  -2 1257.23 83.5193   1
  -1  -7   2 1357.94 79.7921   1
   1   7  -1 94.2563 21.6842   1
  -1  -7   1 81.7608 23.7547   1
  -1  -7   1 98.8782 21.1099   5
   1   7   0 3002.62 132.328   1
  -1  -7   0 3088.81 101.755   5
   1   7   1 92.9637 28.4058   1
  -1  -7  -1 78.6678 18.0508   5
   1   7   2 4496.11 171.924   1
  -1  -7  -2 4677.61 115.529   5
  -1  -7  -3 89.8034 16.4867   5
   1   7   3 95.6072 28.0987   1
  -1  -7  -4 356.136 30.2280   5
  -1  -7  -4 388.947 71.8950   3
   1   7   4 460.096 61.1865   1
   1   7   5 671.181 76.6809   1
  -1  -7  -5 657.964 93.3173   3
   1   7   6 1101.48 97.2956   2
  -1  -7  -6 1136.13 127.250   3
   1   7   6 1069.07 97.3820   1
  -1  -7  -7 3.24418 15.9168   3
   1   7   7 10.6049 21.4342   1
   1   7   7-3.32888 21.4726   2
   1   7   8 260.088 54.4291   1
   1   7   9 33.6827 21.2246   1
   1   7  10 2053.42 155.650   1
   1   7  11 66.5371 35.9209   1
   1   7  12-3.54108 20.7087   1
   1   7  13 16.6951 26.7976   1
   1   7  14 23.3549 30.2392   1
   1   7  15-16.2714 21.7867   1
   1   7  16 15.8536 28.2704   1
   1   7  17 0.22186 21.1566   1
   1   7  18 53.6353 48.2024   1
  -1  -8  26-42.9261 45.3891   3
  -1  -8  25-49.5954 43.2204   3
  -1  -8  24 33.1041 41.8607   3
  -1  -8  23 51.1344 38.8430   3
   1   8 -23 34.9276 21.8994   2
  -1  -8  23 60.1942 25.9583   5
  -1  -8  22 121.156 30.8987   1
   1   8 -22 116.304 34.0287   2
  -1  -8  22 104.341 34.9794   5
  -1  -8  22 91.2959 53.1467   3
  -1  -8  21-2.54713 22.6703   3
   1   8 -21 12.0362 12.5923   2
  -1  -8  21-43.4573 31.0567   5
  -1  -8  20 35.8554 33.2037   2
  -1  -8  20 17.7425 20.9505   5
   1   8 -20 11.7055 14.0628   2
  -1  -8  20 10.8234 23.6395   3
  -1  -8  19 203.784 52.8465   2
  -1  -8  19 162.363 37.6700   5
   1   8 -19 187.904 39.8857   2
  -1  -8  19 83.2445 28.7748   3
  -1  -8  18 288.538 50.4184   5
  -1  -8  18 298.415 57.1425   2
   1   8 -18 324.527 49.9686   2
  -1  -8  17 88.2628 31.2788   5
   1   8 -17 111.820 29.1171   2
  -1  -8  17 127.386 41.1433   2
  -1  -8  16 43.8160 23.4365   2
   1   8 -16 22.5377 9.81799   4
  -1  -8  16 9.56487 16.6605   5
   1   8 -16 37.5344 18.5735   2
   1   8 -15 184.113 29.0854   4
   1   8 -15 161.945 34.9988   2
  -1  -8  15 267.275 51.8315   2
  -1  -8  15 233.247 44.2531   5
  -1  -8  14 103.306 31.6147   5
  -1  -8  14 99.7311 26.5863   1
   1   8 -14 64.5054 19.4788   4
   1   8 -14 101.923 29.0758   2
  -1  -8  13 240.853 41.2536   1
  -1  -8  13 356.620 51.4910   5
   1   8 -13 282.572 45.2458   2
   1   8 -13 276.539 37.0375   4
  -1  -8  12 933.345 80.9614   5
   1   8 -12 938.988 81.6323   2
  -1  -8  12 810.308 69.1028   1
   1   8 -12 832.984 63.8866   4
   1   8 -11 5157.65 157.532   4
  -1  -8  11 4956.28 164.514   1
   1   8 -11 5255.44 190.771   2
  -1  -8  10 4701.09 156.241   1
   1   8 -10 5013.20 187.182   2
   1   8 -10 4792.68 148.158   4
   1   8  -9 1511.43 105.556   2
   1   8  -9 1651.35 85.1602   4
  -1  -8   9 1548.60 87.2495   1
   1   8  -8 348.001 45.7484   1
  -1  -8   8 340.913 39.9064   1
  -1  -8   7 167.134 28.3741   1
   1   8  -7 197.303 36.5113   1
  -1  -8   6 1626.65 86.7445   1
   1   8  -6 1606.20 95.2510   1
  -1  -8   5 534.104 49.8331   1
   1   8  -5 581.955 60.1774   1
  -1  -8   4 2805.40 116.529   5
   1   8  -4 2931.22 127.490   1
  -1  -8   4 2798.46 113.333   1
   1   8  -3 499.550 53.7217   1
  -1  -8   3 455.077 46.8234   5
  -1  -8   3 483.534 50.0943   1
  -1  -8   2 2992.97 113.667   5
  -1  -8   2 3103.19 128.255   1
   1   8  -2 2937.94 131.522   1
  -1  -8   1 31.6802 15.0435   1
  -1  -8   1 30.3217 14.2501   5
   1   8  -1 20.0077 14.3345   1
  -1  -8   0 5017.94 139.625   5
   1   8   0 4587.83 173.490   1
   1   8   1 166.355 36.3041   1
  -1  -8  -1 156.913 25.1457   5
  -1  -8  -2 662.253 48.2012   5
   1   8   2 618.327 66.0198   1
   1   8   3 105.820 34.6751   1
  -1  -8  -3 111.872 19.1816   5
  -1  -8  -4 537.430 41.1451   5
   1   8   4 518.034 66.8567   1
  -1  -8  -5 797.905 107.280   3
   1   8   5 900.734 89.1514   2
   1   8   5 935.531 93.3163   1
  -1  -8  -6 186.315 53.4231   3
   1   8   6 297.956 52.2503   2
   1   8   6 220.722 49.2314   1
   1   8   7 968.765 102.747   1
   1   8   8 9.25357 21.8902   1
   1   8   9 18.2162 25.8798   1
   1   8  10 316.708 68.4599   1
   1   8  11 165.684 50.4537   1
   1   8  12 64.0197 38.4066   1
   1   8  13 34.5002 28.1204   1
   1   8  14-27.7877 26.8609   1
   1   8  15 117.421 48.3847   1
   1   8  16-7.63581 24.6624   1
  -1  -9  26-71.2084 51.8395   3
  -1  -9  25 56.1485 43.7199   3
  -1  -9  24-92.6934 51.5186   3
  -1  -9  24 26.2693 24.2603   5
  -1  -9  23-10.1765 14.9801   5
  -1  -9  23 29.5244 31.9319   3
   1   9 -23 20.7271 19.5398   2
  -1  -9  22 13.8176 15.8082   5
   1   9 -22 4.27717 13.0489   2
  -1  -9  21 51.3837 32.0034   3
   1   9 -21 18.7282 15.3776   2
  -1  -9  21-18.1990 21.3422   5
  -1  -9  20 18.0307 19.4649   5
  -1  -9  20-21.7201 27.8334   3
   1   9 -20 9.34067 13.7505   2
  -1  -9  19 71.5651 29.6229   5
   1   9 -19 41.6239 20.4488   2
  -1  -9  19 54.5135 29.9364   2
  -1  -9  18 76.7721 28.2060   1
   1   9 -18 79.8702 29.8806   2
  -1  -9  18 78.4416 30.5730   5
   1   9 -17 238.071 35.9494   4
   1   9 -17 225.206 41.9132   2
  -1  -9  17 192.522 43.8294   1
  -1  -9  17 274.247 52.3494   5
  -1  -9  16 797.451 78.1169   1
   1   9 -16 783.857 65.6440   4
  -1  -9  16 828.121 86.1927   5
   1   9 -16 870.739 81.0869   2
  -1  -9  15 158.912 37.5740   5
  -1  -9  15 124.748 29.9669   1
   1   9 -15 138.040 25.9422   4
   1   9 -15 138.695 32.7669   2
  -1  -9  14 12.8519 17.2021   1
  -1  -9  14-7.10045 15.4210   5
   1   9 -14-6.68179 15.1025   2
   1   9 -14 8.61539 9.13072   4
   1   9 -13 988.668 84.3759   2
  -1  -9  13 859.429 82.9320   5
   1   9 -13 911.612 72.8048   4
  -1  -9  13 893.305 73.8639   1
  -1  -9  12 353.355 53.3776   5
   1   9 -12 318.592 43.1860   4
  -1  -9  12 285.828 41.3914   1
   1   9 -12 314.098 46.3138   2
   1   9 -11 26.2814 19.1053   2
  -1  -9  11 50.6783 17.8854   1
   1   9 -11 55.8289 19.7675   4
  -1  -9  11 83.1446 28.4752   5
   1   9 -10 3918.70 142.380   4
  -1  -9  10 4016.56 142.993   1
   1   9 -10 3936.77 174.433   2
  -1  -9   9 49.2837 18.4447   1
   1   9  -9 58.5781 25.6196   2
  -1  -9   8 68.8323 16.8764   1
   1   9  -8 28.6810 18.0486   1
   1   9  -7 399.006 50.6562   1
  -1  -9   7 371.820 43.9764   1
  -1  -9   6 211.434 32.7663   1
   1   9  -6 240.548 42.8594   1
  -1  -9   5 1193.46 77.6850   1
   1   9  -5 1162.71 85.6365   1
  -1  -9   4 1283.77 83.5335   5
   1   9  -4 1187.54 85.8879   1
  -1  -9   4 1266.18 82.0117   1
  -1  -9   3 641.990 60.4482   1
   1   9  -3 557.264 60.1930   1
  -1  -9   3 618.002 55.8121   5
   1   9  -2 13.3650 15.6382   1
  -1  -9   2 42.9058 16.3779   5
  -1  -9   2 28.9765 16.1825   1
  -1  -9   1 431.654 53.9187   1
   1   9  -1 460.325 57.3619   1
  -1  -9   1 459.214 47.1328   5
  -1  -9   0 1968.08 93.7406   5
  -1  -9   0 1989.96 116.385   1
   1   9   0 1992.10 120.319   1
   1   9   1 184.499 36.6046   1
  -1  -9  -1 198.819 38.9643   1
  -1  -9  -1 219.819 31.5316   5
   1   9   2 312.220 52.7085   1
  -1  -9  -2 339.409 38.5368   5
  -1  -9  -3-14.8229 15.5495   1
   1   9   3 30.3790 26.5757   1
  -1  -9  -3 13.3914 10.8854   5
   1   9   4 50.7985 27.3907   1
   1   9   4 43.1750 25.1198   2
   1   9   5 268.668 54.0756   1
  -1  -9  -5 226.854 61.0073   3
   1   9   6 33.0376 26.1882   1
   1   9   7 311.479 59.7025   1
   1   9   8 24.0315 24.4669   1
   1   9   9 71.6099 37.3709   1
   1   9  10 56.3543 29.3276   1
   1   9  11 203.660 57.1150   1
   1   9  12 142.974 51.9382   1
   1   9  13 57.7787 44.0202   1
   1   9  14 22.4757 31.6826   1
   1   9  15 39.7188 31.6799   1
  -1 -10  26-14.8012 35.7060   3
  -1 -10  25 60.1796 39.1699   3
  -1 -10  25 55.7787 30.5265   5
  -1 -10  24-35.1572 50.3492   3
  -1 -10  24-19.9092 21.7932   5
  -1 -10  23 10.7545 15.4267   5
  -1 -10  23-5.30623 35.4563   3
  -1 -10  22 67.6573 39.0092   3
   1  10 -22 56.8867 24.0926   2
  -1 -10  22-0.44248 15.9967   5
  -1 -10  21 49.1556 40.0081   3
  -1 -10  21 61.9541 29.9787   5
   1  10 -21 44.5756 20.6095   2
  -1 -10  20 129.705 39.8913   5
   1  10 -20 101.979 30.3560   2
  -1 -10  19 401.108 65.0728   5
   1  10 -19 388.533 54.8444   2
  -1 -10  19 417.012 61.1256   1
   1  10 -19 385.255 45.8433   4
  -1 -10  18 5.05615 14.6829   5
  -1 -10  18 45.4882 23.4503   1
   1  10 -18 13.7022 8.94730   4
   1  10 -18 46.0790 21.3894   2
  -1 -10  17 71.8423 30.4204   5
  -1 -10  17 71.4677 27.3887   1
   1  10 -17 54.8534 17.2496   4
   1  10 -17 31.6966 20.2796   2
  -1 -10  16 115.346 28.5995   1
  -1 -10  16 95.0281 34.8771   5
   1  10 -16 86.5337 24.3133   4
   1  10 -16 129.860 32.7653   2
  -1 -10  15-6.79533 13.8683   1
  -1 -10  15 37.3742 23.2571   5
   1  10 -15 4.40809 13.1885   2
   1  10 -15 6.40328 9.83584   4
   1  10 -14 854.110 75.4722   4
  -1 -10  14 743.898 79.7567   5
  -1 -10  14 781.492 70.2761   1
   1  10 -14 782.967 77.4138   2
  -1 -10  13 592.734 59.0239   1
  -1 -10  13 546.593 67.2099   5
   1  10 -13 542.727 67.4659   2
   1  10 -13 593.687 61.5759   4
   1  10 -12 182.519 40.5598   2
  -1 -10  12 154.440 30.1308   1
   1  10 -12 175.925 33.6623   4
  -1 -10  12 158.563 37.9284   5
   1  10 -11 216.897 43.5998   2
   1  10 -11 167.539 32.5711   4
  -1 -10  11 191.555 40.6070   5
  -1 -10  11 182.187 31.4893   1
   1  10 -10 50.5102 21.4425   2
  -1 -10  10 81.5680 18.1971   1
   1  10 -10 88.5677 24.6992   4
   1  10  -9 861.958 74.3017   1
  -1 -10   9 928.921 67.1035   1
   1  10  -8 785.494 71.4431   1
  -1 -10   8 591.864 53.2832   1
  -1 -10   7 71.8283 21.7722   1
   1  10  -7 100.761 27.8017   1
   1  10  -6 1469.35 99.3233   1
  -1 -10   6 1577.58 89.9517   1
  -1 -10   5 4033.72 147.127   1
   1  10  -5 3888.23 161.786   1
   1  10  -4 53.1737 23.3888   1
  -1 -10   4 15.1824 13.0972   1
  -1 -10   3 1.68301 11.4854   1
   1  10  -3-7.42651 18.9974   1
  -1 -10   2 933.263 78.5202   1
  -1 -10   2 854.259 68.8862   5
   1  10  -2 809.547 77.3230   1
  -1 -10   1 738.978 62.8718   5
  -1 -10   1 701.962 69.8195   1
   1  10  -1 637.283 70.1266   1
  -1 -10   0 47.8327 16.1538   5
   1  10   0 50.3507 22.8440   1
  -1 -10   0 53.0758 20.5713   1
  -1 -10  -1 476.449 48.9277   5
  -1 -10  -1 490.535 65.0218   1
   1  10   1 409.645 59.8024   1
   1  10   2 239.720 49.5312   1
  -1 -10  -2 318.204 39.5458   5
  -1 -10  -2 365.503 58.3530   1
   1  10   3 488.967 70.4958   1
  -1 -10  -3 541.787 72.4317   1
   1  10   3 426.108 63.5092   2
  -1 -10  -3 378.711 42.3219   5
   1  10   4 21.1727 32.9792   1
   1  10   5 999.030 105.753   1
   1  10   6 291.034 60.0350   1
   1  10   7 90.3635 36.0489   1
   1  10   8 23.4231 27.4542   1
   1  10   9 220.065 53.7391   1
   1  10  10 12.6430 25.7190   1
   1  10  11 104.697 45.5992   1
   1  10  12 157.717 56.3884   1
   1  10  13 72.1382 44.8807   1
   1  10  14 59.3600 37.1086   1
  -1 -11  26 13.9586 48.2211   3
  -1 -11  25 0.30056 51.8526   3
  -1 -11  25-6.38293 23.4454   5
  -1 -11  24 25.3325 45.3295   3
  -1 -11  24 27.4341 29.9591   5
  -1 -11  23 45.8900 38.6844   3
  -1 -11  23 88.3061 39.0745   5
  -1 -11  22 8.73552 25.8685   3
  -1 -11  22-6.06839 17.9281   5
   1  11 -22 2.33130 11.3557   2
   1  11 -21 87.0638 25.5334   2
  -1 -11  21 34.7745 14.0036   5
   1  11 -20 19.3904 10.4103   4
  -1 -11  20 72.7571 32.2031   5
   1  11 -20 22.0086 15.8496   2
  -1 -11  19-18.3359 23.4907   5
   1  11 -19 8.51298 10.0062   4
  -1 -11  19-11.7333 18.4884   1
   1  11 -19 2.64397 17.7747   2
   1  11 -18 131.129 30.1557   4
   1  11 -18 94.1670 27.4933   2
  -1 -11  18 123.240 34.9390   5
  -1 -11  18 91.3794 24.1661   1
  -1 -11  17 357.230 49.7176   1
   1  11 -17 363.498 52.0258   4
  -1 -11  17 329.924 58.5919   5
   1  11 -17 371.958 53.8518   2
   1  11 -16 1229.26 98.2514   2
   1  11 -16 1390.62 100.103   4
  -1 -11  16 1353.45 93.9877   1
  -1 -11  16 1502.93 122.135   5
  -1 -11  15 190.529 36.1222   1
   1  11 -15 200.220 41.5880   4
  -1 -11  15 212.140 46.0189   5
   1  11 -15 135.442 33.9808   2
   1  11 -14 166.897 37.5872   4
   1  11 -14 72.8241 26.8787   2
  -1 -11  14 68.4565 22.0883   1
  -1 -11  14 66.7847 27.0373   5
  -1 -11  13 208.220 44.6956   5
  -1 -11  13 167.394 32.0004   1
   1  11 -13 150.848 33.0725   2
   1  11 -13 131.465 32.2909   4
   1  11 -12 7.90903 20.3348   2
  -1 -11  12 12.2821 10.4821   5
  -1 -11  12-23.5482 16.1847   1
   1  11 -12 8.65264 10.6688   4
  -1 -11  11 30.6957 22.3089   5
   1  11 -11 44.7007 24.8882   4
   1  11 -11 78.2391 33.6536   2
  -1 -11  11 47.2875 19.8107   1
   1  11 -10 174.581 37.8993   1
  -1 -11  10 226.932 34.9484   1
   1  11  -9 593.290 64.7894   1
  -1 -11   9 602.028 55.3666   1
  -1 -11   8 2858.63 122.773   1
   1  11  -8 2843.62 141.029   1
  -1 -11   7 77.3387 22.9947   1
  -1 -11   7 87.5807 27.8626   5
   1  11  -7 98.5579 32.6630   1
  -1 -11   6 1427.20 100.847   5
   1  11  -6 1451.27 103.742   1
  -1 -11   6 1333.29 87.1274   1
  -1 -11   5 6970.94 207.026   1
   1  11  -5 6919.09 225.728   1
   1  11  -4 72.7990 28.1368   1
  -1 -11   4 48.2806 19.6052   1
   1  11  -3 37.0645 22.5868   1
  -1 -11   3 43.3751 19.4193   1
  -1 -11   2 44.0700 18.9709   1
   1  11  -2 14.7654 21.7520   1
   1  11  -1 41.0652 24.7253   1
  -1 -11   1 48.2007 20.6365   1
  -1 -11   0 411.267 49.1175   5
  -1 -11   0 464.807 63.1347   1
   1  11   0 355.760 56.1627   1
   1  11   1 616.441 78.4116   1
  -1 -11  -1 588.780 58.1562   5
  -1 -11  -1 674.248 79.2892   1
   1  11   2 1.07041 19.7099   1
  -1 -11  -2 6.55365 8.67506   5
   1  11   2 20.4843 13.8499   2
  -1 -11  -2 23.4498 23.2432   1
   1  11   3 68.5408 31.5095   1
  -1 -11  -3 79.8081 24.0199   5
   1  11   4 493.305 75.5839   1
   1  11   5-4.31345 21.9028   1
   1  11   6 114.852 45.3064   1
   1  11   7 295.582 67.4403   1
   1  11   8 96.1970 41.4331   1
   1  11   9 85.3307 38.0064   1
   1  11  10 3.31464 26.1245   1
   1  11  11 29.2065 28.7059   1
   1  11  12 240.408 69.1246   1
   1  11  13 14.6640 21.3137   1
  -1 -12  26 15.7315 43.1450   3
  -1 -12  26-36.1568 30.2795   5
  -1 -12  25-128.443 61.7802   3
  -1 -12  25 17.7348 29.2369   5
  -1 -12  24 64.9283 50.4682   3
  -1 -12  24 17.6512 20.5409   5
  -1 -12  23 74.7255 53.0058   3
  -1 -12  23 29.0108 25.8911   5
  -1 -12  22 96.0486 38.0034   5
  -1 -12  21 57.6219 33.5229   5
   1  12 -21 73.8513 25.1508   2
  -1 -12  20 299.212 63.1869   5
   1  12 -20 271.427 43.0449   2
   1  12 -20 285.389 44.1338   4
  -1 -12  19 294.632 57.6312   5
   1  12 -19 195.036 38.5219   2
   1  12 -19 264.883 43.9819   4
  -1 -12  18 26.9441 27.1400   5
  -1 -12  18 27.2261 15.3829   1
   1  12 -18 22.8961 19.5939   4
   1  12 -18 24.6118 13.1814   2
  -1 -12  17 19.8035 12.9956   1
   1  12 -17 19.6647 18.9328   4
   1  12 -17 23.8286 17.7249   2
  -1 -12  17-1.73099 20.1353   5
   1  12 -16 239.954 43.4525   4
  -1 -12  16 287.385 41.5395   1
  -1 -12  16 256.349 55.3090   5
   1  12 -16 175.795 38.4587   2
  -1 -12  15 101.309 38.4328   5
  -1 -12  15 62.1085 19.3926   1
   1  12 -15 46.8380 17.1894   2
   1  12 -14-18.6590 19.8688   2
  -1 -12  14-6.76861 21.1232   5
  -1 -12  14-10.5780 13.2058   1
  -1 -12  13 791.945 63.9483   1
  -1 -12  13 771.064 85.9073   5
   1  12 -13 735.285 83.4473   2
  -1 -12  12 1696.29 92.4928   1
  -1 -12  12 1839.36 129.687   5
   1  12 -12 1589.86 125.421   2
  -1 -12  11 895.573 90.1492   5
   1  12 -11 970.220 98.8860   2
  -1 -12  11 984.161 71.1188   1
  -1 -12  10 549.048 68.9601   5
  -1 -12  10 492.036 51.0642   1
   1  12 -10 559.485 64.4583   1
  -1 -12   9 1584.71 92.1358   1
  -1 -12   9 1594.55 115.427   5
   1  12  -9 1599.64 109.268   1
  -1 -12   8 85.1404 24.8257   1
   1  12  -8 48.6711 25.1808   1
  -1 -12   8 65.0906 25.6328   5
  -1 -12   7 80.6230 22.9752   1
   1  12  -7 60.3933 24.0531   1
  -1 -12   7 82.7199 27.6897   5
   1  12  -6 514.958 66.4527   1
  -1 -12   6 553.521 59.7338   1
  -1 -12   6 587.671 68.0600   5
  -1 -12   5 858.927 76.4920   1
   1  12  -5 748.714 80.3395   1
  -1 -12   5 894.217 81.4095   5
  -1 -12   4 1272.61 95.6769   1
  -1 -12   4 1209.36 93.5759   5
   1  12  -4 1125.18 98.5667   1
  -1 -12   3 379.225 54.8135   1
   1  12  -3 364.587 59.4397   1
   1  12  -2 1025.40 97.5803   1
  -1 -12   2 1051.85 91.4792   1
  -1 -12   1 91.4222 28.2608   1
   1  12  -1 57.9278 29.7733   1
  -1 -12   0 82.7385 29.2107   1
   1  12   0 107.790 35.5242   1
   1  12   1 85.2889 35.3475   1
  -1 -12  -2 1411.10 95.7477   5
   1  12   2 1407.08 123.367   1
   1  12   3 17.8148 29.2184   1
   1  12   4 450.408 73.1645   1
   1  12   5 148.646 49.5670   1
   1  12   6 4.31059 22.7647   1
   1  12   7 84.7798 42.9018   1
   1  12   8 14.7449 40.0399   1
   1  12   9 66.7473 36.4118   1
   1  12  10 35.5157 38.4467   1
   1  12  11 121.030 51.5056   1
   1  12  12-16.6388 22.8869   1
  -1 -13  26-92.5261 59.1148   3
  -1 -13  26-14.1790 24.5676   5
  -1 -13  25 38.4706 34.7445   5
  -1 -13  25-64.8376 49.2742   3
  -1 -13  24 60.6003 58.1619   3
  -1 -13  24-0.18752 17.6710   5
  -1 -13  23 37.3487 33.2745   5
  -1 -13  22 64.7001 32.3793   5
  -1 -13  21 169.202 51.5091   5
   1  13 -21 85.9691 29.3831   2
   1  13 -20 3.51660 11.1980   2
  -1 -13  20 2.38860 24.5855   5
  -1 -13  19 91.3385 38.8650   5
   1  13 -19 103.729 28.9956   2
  -1 -13  18 716.922 66.0628   1
   1  13 -18 796.232 80.1018   2
  -1 -13  18 767.833 97.1089   5
   1  13 -17-11.0633 13.6605   2
  -1 -13  17 3.37900 11.5013   1
  -1 -13  17-12.1826 20.5124   5
  -1 -13  16 73.5886 19.0680   1
   1  13 -16 91.1912 31.7787   2
  -1 -13  16 61.4558 27.8658   5
  -1 -13  15 486.431 50.4732   1
   1  13 -15 521.906 68.8212   2
  -1 -13  15 558.813 76.8687   5
  -1 -13  14 32.3263 15.6643   1
   1  13 -14 50.9752 25.9056   2
  -1 -13  14 23.2492 21.4513   5
   1  13 -13 223.814 47.9960   2
  -1 -13  13 239.923 49.9402   5
  -1 -13  13 175.649 30.2138   1
  -1 -13  12 65.2709 25.2496   5
  -1 -13  12 97.1530 23.7333   1
   1  13 -12 151.804 43.3037   2
  -1 -13  11 16.5189 12.2092   1
   1  13 -11 12.8640 13.2537   1
  -1 -13  11 11.4718 14.1670   5
   1  13 -10 771.848 79.3704   1
  -1 -13  10 660.834 60.7565   1
  -1 -13  10 739.642 83.6513   5
   1  13  -9 16.2237 19.4555   1
  -1 -13   9 9.22498 16.9742   5
  -1 -13   9-8.49892 11.8796   1
  -1 -13   8 1654.96 100.969   1
   1  13  -8 1638.27 116.786   1
  -1 -13   8 1713.24 123.407   5
   1  13  -7 79.1140 30.2565   1
  -1 -13   7 63.9026 25.0108   1
  -1 -13   7 106.001 33.2235   5
   1  13  -6 158.394 39.5428   1
  -1 -13   6 186.405 37.5342   1
  -1 -13   6 162.171 39.9980   5
  -1 -13   5 69.8511 24.0190   1
  -1 -13   5 58.0600 25.0272   5
   1  13  -5 52.9426 22.6444   1
  -1 -13   4 44.3466 26.2409   5
   1  13  -4 32.6336 21.6953   1
  -1 -13   4 56.2043 21.3934   1
  -1 -13   3 194.789 40.6705   1
  -1 -13   3 176.698 37.7772   5
   1  13  -3 186.883 43.4246   1
  -1 -13   2 40.1300 25.2073   1
   1  13  -2-12.3127 25.6581   1
  -1 -13   2 15.2060 15.7172   5
  -1 -13   1 45.3010 22.3778   1
   1  13  -1 36.2135 22.3367   1
   1  13   0 191.642 48.6456   1
   1  13   1 42.9552 31.4192   1
   1  13   2 84.9053 29.3549   1
   1  13   3 41.3920 24.3386   1
   1  13   4-26.2058 29.5056   1
   1  13   5 88.5390 42.3408   1
   1  13   6 107.649 42.8950   1
   1  13   7 41.5986 26.0536   1
   1  13   8 46.0756 37.3461   1
   1  13   9 60.2832 36.2976   1
   1  13  10 56.2262 39.3203   1
   1  13  11 43.2461 34.5342   1
  -1 -14  26 0.21580 23.4013   5
  -1 -14  26-3.69935 36.6789   3
  -1 -14  25-28.8621 28.1541   5
  -1 -14  25 26.1881 49.2424   3
  -1 -14  24 184.534 59.9042   5
  -1 -14  23 111.825 49.6009   5
  -1 -14  22 16.1192 26.0219   5
  -1 -14  21 32.8646 16.9573   5
   1  14 -20-0.17244 11.7627   2
  -1 -14  20 1.50948 17.9275   5
  -1 -14  19-12.2944 16.7322   5
   1  14 -19 29.0994 18.3326   2
   1  14 -18 268.288 47.2520   2
  -1 -14  18 254.752 58.7707   5
  -1 -14  17 24.4239 16.7328   5
   1  14 -17 27.3587 17.3288   2
  -1 -14  17 25.7307 14.7503   1
  -1 -14  16 45.6080 16.3050   1
   1  14 -16 44.6836 16.6699   4
  -1 -14  16 6.40917 26.0042   5
   1  14 -16 51.2679 18.9321   2
  -1 -14  15 381.125 64.7767   5
  -1 -14  15 319.630 40.3376   1
   1  14 -15 350.948 60.5948   2
   1  14 -15 418.662 65.0245   4
   1  14 -14 332.639 57.7261   2
  -1 -14  14 368.354 64.8969   5
  -1 -14  14 336.150 42.1105   1
   1  14 -14 317.324 56.3799   4
   1  14 -13 147.689 45.8465   2
  -1 -14  13 208.542 50.0038   5
   1  14 -13 163.547 42.9995   4
  -1 -14  13 137.609 27.0145   1
  -1 -14  12 20.5667 16.2538   1
  -1 -14  12-11.4582 20.6914   5
   1  14 -12 23.1919 23.0739   4
  -1 -14  11 592.440 79.5872   5
   1  14 -11 678.777 75.6448   1
  -1 -14  11 652.330 60.5058   1
  -1 -14  10 151.930 31.7505   1
   1  14 -10 157.083 38.5168   1
  -1 -14  10 112.426 37.2709   5
  -1 -14   9 216.583 36.7085   1
   1  14  -9 162.414 40.4836   1
  -1 -14   9 162.647 43.0139   5
   1  14  -8 22.5367 22.7800   1
  -1 -14   8 4.69686 13.4133   1
  -1 -14   8 10.0145 13.4366   5
  -1 -14   7 1843.86 114.030   1
   1  14  -7 1655.81 126.320   1
  -1 -14   7 1668.66 124.628   5
   1  14  -6 513.408 74.1746   1
  -1 -14   6 458.512 60.9755   1
  -1 -14   6 443.691 64.2339   5
   1  14  -5 1962.76 139.763   1
  -1 -14   5 2075.83 128.808   1
  -1 -14   5 2161.58 138.459   5
  -1 -14   4 1236.10 102.862   1
   1  14  -4 1176.46 110.061   1
  -1 -14   4 1257.83 105.029   5
  -1 -14   3 9.16313 20.1017   1
  -1 -14   3 27.3192 20.4249   5
   1  14  -3-34.0249 33.9224   1
  -1 -14   2 46.2921 16.7371   5
   1  14  -2 114.485 38.7879   1
  -1 -14   1-0.81241 14.2030   5
   1  14  -1-8.91934 24.1295   1
   1  14   0-14.8672 18.4372   1
  -1 -14   0 1.81908 14.6998   5
   1  14   1 31.3642 22.7035   1
   1  14   2-4.94298 23.6596   1
   1  14   3 731.409 98.9998   1
   1  14   4 317.781 69.0237   1
   1  14   5 217.996 57.0748   1
   1  14   6 74.0386 41.4458   1
   1  14   7 10.7436 28.2830   1
   1  14   8-55.3020 27.4036   1
   1  14   9 39.3196 36.5240   1
   1  14  10-17.5020 32.0501   1
  -1 -15  26 20.1532 61.6076   3
  -1 -15  26-45.7442 35.6891   5
  -1 -15  25 87.6719 50.0970   5
  -1 -15  24 12.6385 27.2212   5
  -1 -15  23 15.8943 27.0529   5
  -1 -15  22 39.2971 25.9146   5
  -1 -15  21-37.7662 24.9202   5
  -1 -15  20 1.23551 20.7067   5
   1  15 -20 8.85742 23.0345   4
   1  15 -19 213.993 42.8436   2
  -1 -15  19 179.305 56.0708   5
   1  15 -19 201.547 51.1270   4
   1  15 -18 181.978 43.5955   2
   1  15 -18 181.808 47.4261   4
  -1 -15  18 264.429 59.0348   5
   1  15 -17-6.76827 18.0390   2
  -1 -15  17 3.51474 24.1073   5
   1  15 -17-2.40765 26.6419   4
   1  15 -16 55.8882 27.8978   2
  -1 -15  16 89.6185 36.0915   5
  -1 -15  16 58.0887 18.1112   1
   1  15 -16 50.3095 30.9552   4
   1  15 -15 115.109 38.6662   4
  -1 -15  15 94.6909 21.1005   1
   1  15 -15 81.2621 26.5490   2
  -1 -15  15 126.875 40.8927   5
   1  15 -14 6.05050 21.8372   2
  -1 -15  14 5.33778 9.84690   1
  -1 -15  14 1.75070 18.0172   5
   1  15 -14-18.2184 25.5596   4
  -1 -15  13 152.066 40.0197   5
   1  15 -13 174.776 43.8565   2
  -1 -15  13 198.121 34.4438   1
   1  15 -13 141.004 42.2277   4
   1  15 -12 501.884 66.4621   1
  -1 -15  12 486.245 52.9820   1
   1  15 -12 516.150 72.4367   4
  -1 -15  12 617.784 85.0868   5
  -1 -15  11 1157.85 86.3051   1
   1  15 -11 1166.31 102.191   1
  -1 -15  11 1166.19 115.140   5
  -1 -15  10 102.771 37.5796   5
  -1 -15  10 94.9767 25.5608   1
   1  15 -10 83.0782 31.8956   1
   1  15  -9 879.723 94.6220   1
  -1 -15   9 1076.37 105.741   5
  -1 -15   9 1045.21 85.1231   1
   1  15  -8 135.041 39.9875   1
  -1 -15   8 87.2691 24.0511   1
  -1 -15   8 119.192 37.2276   5
  -1 -15   7 9.89841 13.1740   1
   1  15  -7-19.5152 20.5932   1
  -1 -15   7 16.6013 21.2050   5
  -1 -15   6 956.866 89.8543   1
  -1 -15   6 957.274 97.6082   5
   1  15  -6 871.771 98.5041   1
  -1 -15   5 1065.64 101.461   5
   1  15  -5 930.210 100.978   1
  -1 -15   5 1053.15 97.0605   1
  -1 -15   4 372.615 60.2986   1
  -1 -15   4 331.903 55.4730   5
   1  15  -4 280.678 58.3684   1
  -1 -15   3 213.913 47.0419   5
   1  15  -3 269.093 59.9620   1
   1  15  -2 5.58100 23.5098   1
  -1 -15   2 20.1673 20.7636   5
  -1 -15   1 367.175 60.4534   5
   1  15  -1 267.119 61.1760   1
   1  15   0 307.670 65.4027   1
  -1 -15   0 297.048 54.9462   5
  -1 -15  -1 144.456 41.4069   5
   1  15   1 170.673 48.2721   1
   1  15   2 78.0091 30.6281   1
   1  15   3 237.266 66.5443   1
   1  15   4 114.941 43.0106   1
   1  15   5-3.04522 24.5054   1
   1  15   6 34.9258 30.8067   1
   1  15   7-15.0643 29.0232   1
   1  15   8 26.5331 38.4884   1
  -1 -16  25 2.50343 23.7051   5
  -1 -16  24 150.275 59.6824   5
  -1 -16  23 210.567 61.3150   5
  -1 -16  22-11.2568 21.7371   5
  -1 -16  21 133.113 43.6577   5
  -1 -16  20 59.6832 34.6938   5
   1  16 -20 12.6540 14.7161   4
   1  16 -19 135.838 35.5667   2
  -1 -16  19 205.216 57.4955   5
   1  16 -19 241.591 55.1032   4
  -1 -16  18 72.9364 30.5092   5
   1  16 -18 98.3658 34.5644   4
   1  16 -18 66.1392 26.0728   2
  -1 -16  17 99.4746 40.1518   5
   1  16 -17 56.6883 26.3443   2
   1  16 -17 60.9464 27.7298   4
   1  16 -16 3.97917 19.0063   4
   1  16 -16-8.25586 21.4707   2
  -1 -16  16 20.3929 29.2027   5
  -1 -16  15 12.1521 14.2536   1
   1  16 -15-1.67147 19.7686   2
  -1 -16  15 5.77194 17.5917   5
   1  16 -15 32.4439 19.1530   4
   1  16 -14 49.6085 31.7571   2
  -1 -16  14 57.9287 29.0023   5
  -1 -16  14 35.8801 16.5533   1
   1  16 -14 34.1836 29.5230   4
   1  16 -13 369.171 64.0743   4
  -1 -16  13 494.240 80.0256   5
  -1 -16  13 387.716 48.1227   1
  -1 -16  12 188.702 33.6482   1
  -1 -16  12 178.353 47.4919   5
   1  16 -12 179.903 41.3141   1
  -1 -16  11 167.407 33.8021   1
   1  16 -11 217.922 50.2821   1
  -1 -16  11 260.073 57.4253   5
   1  16 -10 45.8588 26.3570   1
  -1 -16  10 128.677 34.1237   1
  -1 -16  10 110.006 38.9416   5
   1  16  -9 237.963 51.8171   1
  -1 -16   9 249.129 54.2188   5
  -1 -16   9 274.255 46.7851   1
  -1 -16   8 30.0699 15.8535   5
  -1 -16   8 23.6801 18.4975   1
   1  16  -8 48.8067 31.3797   1
   1  16  -7 848.299 98.0347   1
  -1 -16   7 1028.28 94.4125   1
  -1 -16   7 836.455 96.6100   5
   1  16  -6 747.404 96.3202   1
  -1 -16   6 851.154 95.0898   5
  -1 -16   6 738.513 83.0492   1
   1  16  -5 24.7331 21.1352   1
  -1 -16   5 56.9609 25.6243   5
  -1 -16   4 11.2463 14.4790   5
   1  16  -4 66.5758 39.1526   1
  -1 -16   3-20.9554 18.2068   5
   1  16  -3 33.8627 28.7949   1
   1  16  -2 179.023 53.1229   1
  -1 -16   2 105.529 35.1406   5
  -1 -16   1 9.21159 25.6462   5
   1  16  -1 30.2678 20.9414   1
  -1 -16   0 474.534 70.3945   5
   1  16   0 404.870 74.4098   1
   1  16   1 192.729 52.2373   1
   1  16   2 175.744 51.9847   1
   1  16   3 26.9579 30.6129   1
   1  16   4-26.6366 35.9590   1
   1  16   5-41.3052 33.6938   1
   1  16   6-36.7823 34.8096   1
   1  16   7-35.5979 33.7595   1
  -1 -17  24 6.64869 27.2522   5
  -1 -17  23 135.600 56.2995   5
  -1 -17  22 14.6214 24.2645   5
  -1 -17  21 34.3213 30.1628   5
  -1 -17  20 5.32780 18.2897   5
   1  17 -20-31.4579 24.1740   4
  -1 -17  19 0.38181 26.7265   5
   1  17 -19 27.0576 21.6184   4
  -1 -17  18-15.9080 21.0526   5
   1  17 -18 17.2120 23.0916   4
   1  17 -18 1.54529 18.1213   2
   1  17 -17 11.4656 14.2419   2
  -1 -17  17 35.7577 27.4451   5
   1  17 -17 43.6225 31.3175   4
   1  17 -16-8.11364 19.5189   2
  -1 -17  16 12.4077 18.7027   5
   1  17 -16 20.5907 27.1694   4
   1  17 -15 172.125 51.9923   2
  -1 -17  15 182.698 51.2782   5
   1  17 -15 163.814 42.1011   4
  -1 -17  14 20.2487 14.1446   1
  -1 -17  14-4.65303 23.4597   5
   1  17 -14 3.39479 21.3649   4
   1  17 -14 21.9638 24.8138   2
  -1 -17  13 33.3023 25.9448   5
  -1 -17  13 38.0785 17.7951   1
   1  17 -13 87.8449 37.5216   1
   1  17 -13 55.1813 30.1593   4
  -1 -17  12 888.579 108.826   5
   1  17 -12 813.092 92.7474   1
  -1 -17  12 749.104 71.8260   1
   1  17 -11 107.984 37.1046   1
  -1 -17  11 149.861 50.2022   5
  -1 -17  11 75.8075 25.4884   1
  -1 -17  10 34.6937 26.2491   5
  -1 -17  10 1.04811 14.8121   1
   1  17 -10 6.09948 16.6855   1
  -1 -17   9 347.579 53.2689   1
  -1 -17   9 310.494 65.4331   5
   1  17  -9 268.697 53.9976   1
   1  17  -8 168.045 48.5323   1
  -1 -17   8 229.114 47.4078   1
  -1 -17   8 243.323 55.9189   5
  -1 -17   7 321.592 54.6243   1
   1  17  -7 356.622 65.1330   1
  -1 -17   7 415.853 72.1000   5
  -1 -17   6 720.880 93.9106   5
   1  17  -6 559.245 83.3074   1
   1  17  -5-31.0674 27.7505   1
  -1 -17   5 7.24178 17.6764   5
  -1 -17   4 0.98586 20.5330   5
   1  17  -4 50.0050 33.7905   1
   1  17  -3 6.57705 22.1346   1
  -1 -17   3-13.0078 22.7075   5
   1  17  -2 4.02847 23.4014   1
  -1 -17   2-18.8325 19.5243   5
   1  17  -1-8.93759 16.7519   1
  -1 -17   1-11.5019 20.9882   5
  -1 -17   0 7.97212 16.7848   5
   1  17   0 27.5890 24.9221   1
   1  17   1 20.8597 29.0735   1
   1  17   2 56.6840 31.0887   1
   1  17   3 25.4299 33.6201   1
   1  17   4 2.05507 30.1480   1
   1  17   5 69.3541 54.8466   1
   1  17   6 8.55853 28.7078   1
  -1 -18  22 30.6351 32.6056   5
  -1 -18  21 125.272 52.4048   5
  -1 -18  20-33.0095 28.7546   5
   1  18 -20 5.31115 24.8539   4
  -1 -18  19 26.9294 44.5101   5
   1  18 -19 2.20990 19.4533   4
  -1 -18  18-5.50604 18.5639   5
   1  18 -18 9.95521 21.2951   4
   1  18 -17 100.790 36.0706   2
  -1 -18  17 77.6706 32.0629   5
   1  18 -17 75.9171 32.2622   4
   1  18 -16 18.0242 21.9983   4
   1  18 -16 23.3866 17.6480   2
  -1 -18  16 12.4920 15.2058   5
   1  18 -15 105.386 44.5739   2
  -1 -18  15 87.5599 41.0058   5
   1  18 -15 86.4396 36.7988   4
   1  18 -14 70.5781 32.8672   2
  -1 -18  14 87.9473 37.6567   5
   1  18 -14 33.9565 24.8680   4
   1  18 -13 180.724 50.7386   4
  -1 -18  13 254.749 59.7668   5
   1  18 -13 215.177 51.1868   1
  -1 -18  12 14.7430 14.5976   1
  -1 -18  12 11.1141 16.5554   5
   1  18 -12 20.6658 18.9014   1
   1  18 -11-4.05745 20.7377   1
  -1 -18  11-7.72671 12.6577   1
  -1 -18  11 28.3792 28.1927   5
  -1 -18  10 42.9167 32.8360   5
   1  18 -10 33.7134 31.8625   1
  -1 -18  10 4.19302 19.5532   1
  -1 -18   9 38.9025 25.1141   1
  -1 -18   9 36.1103 28.7438   5
   1  18  -9 53.7915 33.5589   1
   1  18  -8 94.5577 42.2968   1
  -1 -18   8-29.6749 31.5375   5
   1  18  -7 480.550 80.8088   1
  -1 -18   7 456.779 76.7445   5
  -1 -18   6 390.210 70.3271   5
   1  18  -6 297.921 68.9221   1
   1  18  -5 97.0415 42.1757   1
  -1 -18   5 101.089 39.1553   5
  -1 -18   4 205.958 51.3168   5
   1  18  -4 176.428 50.1026   1
  -1 -18   3 55.1646 30.7994   5
   1  18  -3 21.3185 17.6925   1
   1  18  -2 67.7250 42.8044   1
  -1 -18   2-21.8416 25.5693   5
   1  18  -1 17.2758 30.1538   1
  -1 -18   1-8.81084 24.2803   5
   1  18   0-5.17326 18.5946   1
   1  18   1-6.47913 21.4207   1
   1  18   2 87.3046 42.8972   1
   1  18   3 104.276 42.0488   1
   1  18   4-17.3190 29.0938   1
  -1 -19  21 4.57713 22.0145   5
  -1 -19  20 157.025 51.1652   5
  -1 -19  19 23.6609 27.1680   5
   1  19 -19 0.73184 17.8613   4
  -1 -19  18 75.1320 34.6076   5
   1  19 -18 3.42619 22.2478   4
  -1 -19  17-24.4767 27.7091   5
   1  19 -17 0.89174 16.8574   4
   1  19 -16 20.4406 33.2180   2
  -1 -19  16 24.5012 27.1013   5
   1  19 -16-46.1086 32.7906   4
   1  19 -15 26.7313 28.8639   2
   1  19 -15 13.5842 31.9514   4
  -1 -19  15-31.1848 29.8588   5
  -1 -19  14 115.927 44.6863   5
   1  19 -14 93.0494 39.4564   1
   1  19 -14 93.6067 37.9596   4
  -1 -19  13 25.4830 29.4212   5
   1  19 -13 42.6944 25.7272   1
   1  19 -13 24.8160 29.9484   4
  -1 -19  12 1.10643 16.9702   5
   1  19 -12 27.7055 24.7334   1
   1  19 -11 152.738 48.5945   1
  -1 -19  11 105.743 42.5008   5
  -1 -19  10 283.477 66.1527   5
   1  19 -10 352.791 65.9903   1
   1  19  -9 2.31613 18.0898   1
  -1 -19   9 13.7556 26.0197   5
   1  19  -8 72.4103 31.5801   1
  -1 -19   8 30.0505 27.4993   5
   1  19  -7 10.1847 21.1252   1
  -1 -19   7 63.9687 33.8921   5
   1  19  -6 5.79009 19.7187   1
  -1 -19   6 14.5879 21.9196   5
  -1 -19   5 2.21450 29.6583   5
   1  19  -5 68.5695 42.6907   1
  -1 -19   4 17.2998 21.2875   5
   1  19  -4 100.372 44.5234   1
  -1 -19   3 95.6177 40.9460   5
   1  19  -3 102.507 43.0552   1
   1  19  -2-12.6508 31.3956   1
  -1 -19   2-13.4319 29.7048   5
   1  19  -1-8.19668 22.5950   1
   1  19   0-3.36978 29.1932   1
   1  19   1-6.09138 24.7953   1
   1  19   2 38.6396 41.0494   1
   1  19   3 76.2981 49.9306   1
  -1 -20  20-0.23566 33.5132   5
   1  20 -19 31.1113 27.1798   4
  -1 -20  19 56.7905 36.7961   5
  -1 -20  18 69.6531 37.2355   5
   1  20 -18 1.73425 19.2016   4
  -1 -20  17-17.8802 16.0634   5
   1  20 -17 13.5330 29.6753   4
   1  20 -16 33.2705 20.1145   4
  -1 -20  16 92.3839 50.7681   5
   1  20 -15 32.9950 30.9933   4
   1  20 -15 4.08657 20.2485   2
  -1 -20  15 36.1773 34.1304   5
  -1 -20  14 54.0605 37.0557   5
   1  20 -14-9.29432 18.5602   1
   1  20 -14 40.9395 30.9404   4
   1  20 -13 26.8914 26.9470   1
  -1 -20  13 24.4518 28.5707   5
   1  20 -13 14.2940 20.0155   4
   1  20 -12 113.560 45.1612   1
  -1 -20  12 62.7043 38.7931   5
   1  20 -11 30.5323 24.2750   1
  -1 -20  11 20.3882 20.5461   5
   1  20 -10 42.8187 27.8992   1
  -1 -20  10 8.32749 21.9885   5
   1  20  -9 223.862 59.0510   1
  -1 -20   9 168.769 52.6769   5
   1  20  -8 39.8638 33.5941   1
  -1 -20   8 30.8020 20.4994   5
   1  20  -7-1.90382 25.6642   1
  -1 -20   7-21.8503 24.5967   5
   1  20  -6 2.16549 20.1714   1
  -1 -20   6 33.0997 35.4861   5
   1  20  -5 76.2065 43.5237   1
  -1 -20   5 73.1510 38.2399   5
   1  20  -4-22.9911 29.7100   1
  -1 -20   4-35.5254 28.0306   5
  -1 -20   3-31.9013 26.6107   5
   1  20  -3 5.42582 22.8624   1
   1  20  -2 57.8311 39.9236   1
   1  20  -1-39.0587 38.3584   1
   1  20   0 19.7147 33.8769   1
   1  20   1 26.3735 36.2390   1
   1  21 -19-70.3703 38.3056   4
  -1 -21  18 0.23860 24.7403   5
   1  21 -18-13.5869 22.4452   4
  -1 -21  17 34.5568 28.4464   5
   1  21 -17 113.052 48.1456   4
  -1 -21  16 29.0689 35.1679   5
   1  21 -16 17.6740 28.0567   4
  -1 -21  15 101.106 47.5865   5
   1  21 -15 18.5908 23.1048   4
   1  21 -14 31.7853 25.2199   4
  -1 -21  14 123.486 49.5686   5
   1  21 -13 9.85854 31.1341   4
   1  21 -13-4.57218 20.3958   1
  -1 -21  13-33.5574 27.4273   5
  -1 -21  12 26.6972 24.3566   5
   1  21 -12 47.1410 30.4399   1
  -1 -21  11 42.0434 33.1753   5
   1  21 -11-17.2889 29.0416   1
  -1 -21  10 86.5972 43.6850   5
   1  21 -10 71.5377 38.5921   1
   1  21  -9-18.7512 26.2982   1
  -1 -21   9 3.12963 20.3795   5
   1  21  -8 69.0416 39.4989   1
  -1 -21   8 14.2602 18.3225   5
   1  21  -7-71.1165 38.7813   1
  -1 -21   7 103.812 48.9744   5
   1  21  -6-91.4614 46.6827   1
  -1 -21   6-0.61349 23.3501   5
   1  21  -5 28.5489 24.7749   1
  -1 -21   5 82.6584 46.0096   5
  -1 -21   4-55.8990 34.4057   5
   1  21  -4-103.640 47.9008   1
   1  21  -3 23.0144 28.8998   1
   1  21  -2 83.2024 52.0537   1
   1  21  -1-33.6634 26.8544   1
   1  21   0 45.0434 43.3372   1
   1  22 -19 0.22073 26.1722   4
   1  22 -18-0.21987 19.9755   4
   1  22 -17-19.4500 25.7446   4
   1  22 -16-0.21830 33.8908   4
  -1 -22  16 1.71836 24.2299   5
   1  22 -15 6.30816 28.3726   4
  -1 -22  15 60.2691 42.5228   5
  -1 -22  14 11.6776 30.1173   5
   1  22 -14 77.3790 37.0138   4
  -1 -22  13 176.470 61.3745   5
   1  22 -13 84.5274 39.4588   4
  -1 -22  12 431.529 94.0650   5
   1  22 -12 404.656 79.2235   1
  -1 -22  11 146.699 54.6952   5
   1  22 -11 108.501 37.8097   1
   1  22 -10 45.1847 32.8511   1
  -1 -22  10-34.4887 31.3516   5
   1  22  -9 7.29839 20.9709   1
  -1 -22   9 8.36642 28.6590   5
   1  22  -8-6.05098 27.5889   1
  -1 -22   8-50.4536 35.7450   5
   1  22  -7-19.3839 25.0423   1
  -1 -22   7-42.8942 35.3207   5
   1  22  -6-110.538 49.7025   1
  -1 -22   6 13.1805 25.6456   5
  -1 -22   5-22.2608 26.9402   5
   1  22  -5 26.6728 40.3285   1
   1  22  -4 15.7011 24.8176   1
   1  22  -3 26.3807 29.7768   1
   1  22  -2-32.1279 33.1013   1
   1  23 -18 8.92395 24.8883   4
   1  23 -17-35.5914 33.9772   4
   1  23 -16 35.4141 34.6074   4
   1  23 -15 111.534 57.0078   4
   1  23 -14-20.4155 28.0210   4
  -1 -23  13 58.0363 37.3445   5
   1  23 -13 34.6380 30.5546   4
  -1 -23  12 182.925 67.8609   5
  -1 -23  11 117.697 63.0660   5
  -1 -23  10 6.91775 22.2674   5
   1  23 -10 15.7473 33.2696   1
   1  23  -9-33.9168 32.9601   1
  -1 -23   9-40.2100 34.2115   5
   1  23  -8 57.1341 25.5476   1
  -1 -23   8-39.8345 32.9484   5
   1  23  -7 122.195 57.7194   1
  -1 -23   7 3.18517 25.9231   5
  -1 -23   6-60.3179 40.7707   5
   1  23  -6 46.3167 35.1775   1
   1  23  -5-86.0562 48.1233   1
   1  23  -4 35.9514 41.8326   1
   1  24 -18 0.75081 28.6320   4
   1  24 -17 7.02340 34.3434   4
   1  24 -16 7.30463 24.3564   4
   1  24 -15 44.1396 52.5253   4
   1  24 -14 52.8952 51.3904   4
   1  24 -13 124.209 63.9073   4
  -1 -24  10-65.6122 44.7678   5
  -1 -24   9-60.9889 42.4328   5
   1  24  -8 48.4197 45.4194   1
  -1 -24   8 0.53299 24.2481   5
   1  24  -7 23.0926 31.6296   1
  -1 -24   7-30.8090 32.6900   5
   1  24  -6-82.5941 49.2105   1
   1  24  -5 20.5486 48.3392   1
  -2  23  -2 0.22515 34.7402   1
  -2  23  -3 46.3534 29.6803   1
  -2  23  -4 31.5434 29.5738   1
  -2  23  -5 30.2931 36.1894   1
  -2  23 -11-25.3833 40.9880   4
  -2  23 -12-61.1075 43.2421   4
  -2  23 -13 18.1022 38.7154   4
  -2  23 -14 0.28907 56.6174   4
  -2  23 -15 87.4515 57.5958   4
  -2  23 -16 4.12828 35.7851   4
  -2  23 -17 70.7466 55.1703   4
  -2  23 -18 0.30308 31.4669   4
  -2  23 -19 53.2507 62.2820   4
  -2  22   0 9.17491 24.4000   1
  -2  22  -1 24.8869 31.4096   1
  -2  22  -2 70.3071 48.7091   1
  -2  22  -3 34.7425 21.1963   1
  -2  22  -4-25.8301 27.3635   1
  -2  22  -5 29.2353 35.2029   1
  -2  22  -6 39.0290 46.1578   4
  -2  22  -6 40.1150 21.3295   1
  -2  22  -7-2.39766 21.3447   1
  -2  22  -7 0.26938 37.6179   4
  -2  22  -8 110.628 58.3809   4
  -2  22  -9 165.432 69.1519   4
  -2  22 -10 32.5977 37.8714   4
  -2  22 -11 5.34712 26.2608   4
  -2  22 -12 2.41459 22.7454   4
  -2  22 -13 51.7063 53.0311   4
  -2  22 -14-0.27306 40.0556   4
  -2  22 -15 80.5888 57.5351   4
  -2  22 -16 87.0078 55.0255   4
  -2  22 -17-18.5105 31.0874   4
  -2  22 -18-17.3730 30.9557   4
  -2  22 -19 0.29508 31.2939   4
  -2  22 -20-73.5039 49.3146   4
  -2  22 -21-17.7906 45.4452   4
  -2  21   1 9.72779 24.3919   1
  -2  21   0 20.7160 31.4771   1
  -2  21  -1-11.6776 23.8255   1
  -2  21  -2-48.2153 32.6512   1
  -2  21  -3 34.6742 34.7357   1
  -2  21  -4-26.1350 22.4392   1
  -2  21  -4-42.7943 35.8303   4
  -2  21  -5 34.5915 33.0663   4
  -2  21  -5-28.6790 24.2675   1
  -2  21  -6 10.2830 23.5889   1
  -2  21  -6 40.0593 33.8367   4
  -2  21  -7-13.7501 20.4273   1
  -2  21  -7-27.5798 31.4909   4
  -2  21  -8 61.5058 33.3946   1
  -2  21  -8 5.74300 30.5247   4
  -2  21  -9 84.3575 44.5239   4
  -2  21 -10 3.25053 23.7324   4
  -2  21 -11-71.9729 44.2541   4
  -2  21 -12 2.52450 33.6063   4
  -2  21 -13 55.1368 39.7488   4
  -2  21 -14-43.4170 35.7236   4
  -2  21 -15 0.52476 29.2133   4
  -2  21 -16 55.1253 45.9242   4
  -2  21 -17 1.89872 32.4422   4
  -2  21 -18 51.3246 39.0176   4
  -2  21 -19 15.0314 38.2422   4
  -2  21 -20 13.7932 36.3917   4
  -2  21 -21 78.5656 61.7994   4
  -2  20   3 21.4612 27.8554   1
  -2  20   2 1.51331 17.9306   1
  -2  20   1 17.8053 32.9621   1
  -2  20   0-35.4214 28.8291   1
  -2  20  -1-37.0094 29.3534   1
  -2  20  -2-28.5847 26.4213   1
  -2  20  -3 40.6814 25.1936   1
  -2  20  -4 76.3686 33.5611   1
  -2  20  -5-41.7740 41.2970   4
  -2  20  -5-10.6618 20.3501   1
  -2  20  -6-31.7385 23.1675   1
  -2  20  -6 42.3674 34.0862   4
  -2  20  -7 27.9349 40.7512   4
  -2  20  -7-10.7113 18.9350   1
  -2  20  -8 39.1856 29.8646   1
  -2  20  -8 5.58641 21.3395   4
  -2  20  -9 67.1722 28.7608   1
  -2  20  -9 74.6097 44.6709   4
  -2  20 -10 22.9818 14.6107   1
  -2  20 -10-38.1617 39.7543   4
  -2  20 -11 59.5678 34.2942   4
  -2  20 -12 152.123 59.4570   4
  -2  20 -13 89.7001 41.0699   4
  -2  20 -14 52.6124 33.7185   4
  -2  20 -15 32.9737 28.9393   4
   2 -20  16 103.018 58.4242   5
  -2  20 -16 69.4753 41.6771   4
   2 -20  17-36.0731 40.2221   5
  -2  20 -17-60.2803 40.6875   4
   2 -20  18 109.888 62.0720   5
  -2  20 -18 74.7167 49.9423   4
   2 -20  19 92.5180 54.1072   5
  -2  20 -19 83.0752 48.8215   4
  -2  20 -20 94.7716 60.3223   4
  -2  20 -21-42.4158 39.9418   4
  -2  20 -22-0.27925 34.6231   4
  -2  19   4 48.6802 40.0608   1
  -2  19   3 41.5812 31.0156   1
  -2  19   2 27.9251 31.3772   1
  -2  19   1 8.66848 26.2247   1
  -2  19   0 38.3080 32.0766   1
  -2  19  -1 37.0209 24.0785   1
  -2  19  -2 5.72216 20.5303   1
  -2  19  -3 12.7240 17.0129   1
  -2  19  -4-7.44508 14.5802   1
  -2  19  -5 9.25371 19.9123   1
  -2  19  -5 5.90945 18.1202   4
  -2  19  -6 30.2297 24.3697   1
  -2  19  -6 123.487 52.6648   4
  -2  19  -7 59.2656 42.7173   4
  -2  19  -7 5.72288 17.5239   1
  -2  19  -8 48.4605 35.4037   4
  -2  19  -8 122.256 37.3024   1
  -2  19  -8 44.6276 31.8730   2
  -2  19  -9 108.096 48.4834   4
  -2  19  -9 61.8443 22.9975   1
  -2  19 -10 1.08361 13.0114   1
  -2  19 -10-29.4082 38.1137   4
  -2  19 -11 19.8256 14.6554   1
  -2  19 -11 30.1167 29.5918   4
  -2  19 -12 73.9255 41.2207   4
  -2  19 -13-4.10664 31.5092   4
   2 -19  14 408.243 93.9977   5
  -2  19 -14 228.394 68.8913   4
   2 -19  15 231.199 71.4455   5
  -2  19 -15 105.793 43.5188   4
  -2  19 -16 86.3222 46.5457   4
   2 -19  16 136.761 56.6234   5
   2 -19  17 137.648 47.0996   5
  -2  19 -17 57.7620 36.2328   4
   2 -19  18 28.8646 19.2480   5
  -2  19 -18 100.401 55.9351   4
   2 -19  19-21.7248 25.9415   5
  -2  19 -19 0.51831 24.1587   4
   2 -19  20 6.59344 25.6565   5
  -2  19 -20 0.26293 32.3865   4
  -2  19 -21 140.235 60.8590   4
  -2  19 -22 45.7171 38.9774   4
  -2  18   5-30.5771 31.9038   1
  -2  18   4 81.5544 48.3766   1
  -2  18   3 115.998 45.4684   1
  -2  18   2-33.8590 38.8012   1
  -2  18   1 37.7339 31.1535   1
  -2  18   0 101.402 39.6344   1
  -2  18  -1 16.0609 15.7753   1
  -2  18  -2 0.86976 28.2131   1
  -2  18  -3 5.72735 19.5185   1
  -2  18  -4-9.46265 21.6805   1
  -2  18  -5 106.231 28.7889   1
  -2  18  -5 120.923 46.4800   4
  -2  18  -6-16.8990 16.6070   1
  -2  18  -6-40.5846 44.9474   4
  -2  18  -6-20.1638 18.7804   2
  -2  18  -7 457.693 66.8550   2
  -2  18  -7 584.634 69.8907   1
  -2  18  -7 556.696 97.0150   4
  -2  18  -8 414.940 58.0414   1
  -2  18  -8 457.489 85.0935   4
  -2  18  -8 299.935 52.2964   2
  -2  18  -9 58.4459 36.2791   4
  -2  18  -9 16.7827 11.1278   1
  -2  18 -10 98.2125 26.6836   1
  -2  18 -10 56.2525 33.4125   4
  -2  18 -11 64.8652 23.7080   1
  -2  18 -11 61.3454 43.8805   4
   2 -18  12-30.0498 33.9794   5
  -2  18 -12 3.42962 9.71252   1
  -2  18 -12 18.4720 28.2475   4
   2 -18  13 15.2045 32.0450   5
  -2  18 -13-36.7849 38.6869   4
   2 -18  14 21.6190 27.7135   5
  -2  18 -14 47.7673 38.7189   4
  -2  18 -15 78.9020 37.9644   4
   2 -18  15 25.0045 23.3764   5
  -2  18 -16-33.6907 31.8046   4
   2 -18  16-19.0240 28.3548   5
   2 -18  17 57.9503 52.1584   5
  -2  18 -17 4.07507 25.5225   4
  -2  18 -18 33.9700 25.5077   4
   2 -18  18 188.561 67.2247   5
  -2  18 -19 75.0002 43.3851   4
   2 -18  19 192.245 74.2037   5
   2 -18  20 7.80941 25.8716   5
  -2  18 -20 0.50388 90.9856   4
   2 -18  21 48.9943 42.1325   5
  -2  18 -21 62.3659 42.0700   4
  -2  18 -22 23.0630 29.2064   4
  -2  17   7-10.7121 29.4453   1
  -2  17   6 27.4543 23.1293   1
  -2  17   5 22.5630 35.5566   1
  -2  17   4 90.1355 42.5978   1
  -2  17   3-22.9755 30.0808   1
  -2  17   2 40.9706 31.0709   1
  -2  17   1 42.1326 25.7598   1
  -2  17   0-9.31097 24.3801   1
  -2  17  -1 79.2976 32.1543   1
  -2  17  -2 20.3430 21.2666   1
  -2  17  -3 91.1325 36.2537   1
  -2  17  -4 51.7933 22.5533   1
  -2  17  -5-4.73461 18.4041   1
  -2  17  -5-19.0324 21.9777   2
  -2  17  -5-38.1731 32.7867   4
  -2  17  -6-29.6032 20.2336   1
  -2  17  -6 46.1399 32.4389   4
  -2  17  -6 34.4969 20.6068   2
  -2  17  -7 14.5972 12.5082   1
  -2  17  -7 41.0266 25.6844   4
  -2  17  -7 41.6433 23.1114   2
  -2  17  -8-7.58727 25.1750   4
  -2  17  -8 14.0982 16.0848   1
  -2  17  -9 12.5511 15.5159   1
  -2  17  -9 19.3421 24.2917   4
  -2  17 -10 50.8997 19.8442   1
  -2  17 -10 119.138 42.8401   4
  -2  17 -10 50.5354 20.0132   2
  -2  17 -11 103.742 23.7563   2
   2 -17  11 183.242 61.4481   5
  -2  17 -11 191.202 63.7873   4
  -2  17 -11 84.8262 21.0009   1
  -2  17 -12 118.064 23.1678   2
  -2  17 -12 79.4293 35.6570   4
   2 -17  12 120.941 49.2930   5
  -2  17 -12 63.8798 12.4273   1
   2 -17  13 1040.95 133.035   5
  -2  17 -13 980.628 128.624   4
  -2  17 -14 7.19527 21.7709   4
   2 -17  14-5.60860 24.1035   5
   2 -17  15 105.123 54.9938   5
  -2  17 -15-1.51697 20.6842   4
  -2  17 -16 29.8368 39.7500   4
   2 -17  16 21.2552 26.6003   5
  -2  17 -17 71.2590 29.4483   4
   2 -17  17 237.043 73.1698   5
   2 -17  18 4.68134 21.5125   5
  -2  17 -18 89.0280 44.1729   4
  -2  17 -19 41.0439 36.3342   4
   2 -17  19 32.4286 38.4898   5
   2 -17  20-69.8764 43.4086   5
  -2  17 -20 14.6194 22.0703   4
   2 -17  21 71.2489 40.3229   5
  -2  17 -21 98.5326 53.0015   4
  -2  17 -22 27.5919 34.5981   4
  -2  16   8 31.5934 31.4726   1
  -2  16   7 33.4791 24.6462   1
  -2  16   6 8.80264 23.4458   1
  -2  16   5 45.7479 25.8906   1
  -2  16   4 24.8742 20.6308   1
  -2  16   3 250.951 65.0359   1
  -2  16   2 28.1562 22.7313   1
  -2  16   1 4.90505 28.5026   1
  -2  16   0 3.69367 20.9362   1
  -2  16  -1 3.59481 19.1432   1
  -2  16  -2 168.188 42.3698   1
  -2  16  -3-2.42243 18.8923   2
  -2  16  -3 8.82170 17.2986   1
  -2  16  -4 412.114 59.8973   1
  -2  16  -4 378.301 62.1045   2
  -2  16  -5 47.2323 21.4697   4
  -2  16  -5 75.6886 29.0141   1
  -2  16  -5 93.5545 32.1555   2
  -2  16  -6 136.038 31.3227   1
  -2  16  -6 153.698 38.2971   2
  -2  16  -6 99.0066 42.0803   4
  -2  16  -7 1018.86 121.035   4
  -2  16  -7 960.798 79.8279   1
  -2  16  -8 393.167 75.9333   4
  -2  16  -8 360.942 47.7222   1
  -2  16  -9 52.0847 15.7354   1
  -2  16  -9 18.0243 11.7127   2
  -2  16  -9 50.6797 31.2785   4
  -2  16 -10 49.4205 18.3279   1
   2 -16  10 69.8478 37.0851   5
  -2  16 -10 98.2472 22.7427   2
  -2  16 -10 89.6297 37.3679   4
  -2  16 -11 376.872 76.7010   4
  -2  16 -11 438.307 37.9665   1
   2 -16  11 489.738 88.4615   5
  -2  16 -11 413.003 41.6264   2
  -2  16 -12 76.3532 42.5414   4
  -2  16 -12 109.541 17.0118   2
   2 -16  12 75.4631 30.4461   5
   2 -16  13 100.064 48.9169   5
  -2  16 -13 107.194 46.5719   4
   2 -16  14 482.552 88.7045   5
  -2  16 -14 443.910 86.7167   4
  -2  16 -15 421.605 87.6364   4
   2 -16  15 599.270 101.932   5
   2 -16  16 101.843 48.8192   5
  -2  16 -16 77.7827 40.8752   4
  -2  16 -17 47.0642 38.0101   4
   2 -16  17 59.1473 36.3596   5
  -2  16 -18 7.79157 22.8410   4
   2 -16  18-8.41723 29.1466   5
   2 -16  19 62.1424 30.6194   5
  -2  16 -19 39.5427 35.2833   4
   2 -16  20 14.5446 26.9894   5
  -2  16 -20 17.6069 32.4079   4
  -2  16 -21 83.6706 52.6045   4
   2 -16  21-75.0497 43.5040   5
  -2  16 -22-70.7859 41.4053   4
  -2  15   9-11.4637 31.2040   1
  -2  15   8-16.1140 29.1506   1
  -2  15   7 71.7463 41.6524   1
  -2  15   6 42.1079 33.0983   1
  -2  15   5 39.1927 31.0555   1
  -2  15   4 75.8160 40.8247   1
  -2  15   3 24.6567 19.8382   5
  -2  15   3 6.09129 20.0993   1
  -2  15   2 5.65566 14.5613   5
  -2  15   2-7.45761 19.3761   1
  -2  15   1 55.5257 26.0904   1
  -2  15   1 89.7289 30.6068   5
  -2  15   0 29.7087 25.1351   1
  -2  15   0 5.53806 18.1279   5
  -2  15  -1 16.8374 19.6956   1
  -2  15  -2 54.9176 28.2048   2
  -2  15  -2 35.3169 28.9310   1
  -2  15  -3 39.3966 24.6079   2
  -2  15  -3 7.73233 16.0000   1
  -2  15  -4 131.412 36.2641   2
  -2  15  -4 136.837 34.2220   1
  -2  15  -5 407.676 56.6269   2
  -2  15  -5 393.979 75.8502   4
  -2  15  -5 495.465 60.4304   1
  -2  15  -6 20.2241 13.1281   1
  -2  15  -6 30.5222 21.1736   4
  -2  15  -7 1343.66 134.836   4
  -2  15  -7 1243.45 84.6822   1
  -2  15  -7 1246.46 92.1385   2
  -2  15  -8-24.1422 28.2701   4
  -2  15  -8 5.75130 11.0084   1
  -2  15  -8 6.86550 8.27180   2
  -2  15  -9 7.62200 14.6307   2
  -2  15  -9 19.9448 23.7499   4
  -2  15  -9 1.44343 10.2710   1
   2 -15   9-40.2120 44.5813   5
  -2  15 -10 812.057 58.0547   2
  -2  15 -10 832.171 56.0759   1
  -2  15 -10 902.218 114.767   4
   2 -15  10 896.857 114.056   5
  -2  15 -11 16.6240 17.9074   4
   2 -15  11-44.7903 35.5122   5
  -2  15 -11 5.49223 4.43212   1
  -2  15 -11 0.56729 7.58069   2
  -2  15 -12 42.1778 28.1629   4
   2 -15  12 70.9750 30.5186   5
  -2  15 -13 45.0482 28.1823   4
   2 -15  13 47.5564 28.8586   5
  -2  15 -14-11.5732 36.4590   4
   2 -15  14 37.6356 26.5781   5
  -2  15 -15 97.9530 46.0794   4
   2 -15  15 21.3572 28.4687   5
   2 -15  16 252.591 63.9463   5
  -2  15 -16 305.172 71.9258   4
   2 -15  17 5.91316 21.3925   5
  -2  15 -17-44.5437 25.9897   4
   2 -15  18 163.341 55.7976   5
  -2  15 -18 183.586 59.1302   4
   2 -15  19 2.15920 19.4489   5
  -2  15 -19-39.1988 32.1434   4
   2 -15  20 21.4033 22.0154   5
  -2  15 -20 32.1960 20.8372   4
  -2  15 -21-40.3940 32.0218   4
   2 -15  21-46.0998 35.4127   5
  -2  15 -22 13.0007 27.2517   4
  -2  14  10 223.190 71.0290   1
  -2  14   9-22.6507 33.0716   1
  -2  14   8 55.7416 39.7292   1
  -2  14   7 145.398 53.3992   1
  -2  14   6 423.345 79.8007   1
  -2  14   5 107.086 30.8721   5
  -2  14   5 154.829 47.4748   1
  -2  14   4 2.15832 11.2514   5
  -2  14   4 9.44045 20.8501   1
  -2  14   3 28.4738 27.6319   1
  -2  14   3 31.4981 19.3852   5
  -2  14   2 67.7729 26.8626   5
  -2  14   2 51.9660 30.2226   1
  -2  14   1 37.4047 26.2387   1
  -2  14   1 91.7300 29.0462   5
  -2  14   0 387.169 64.1327   1
  -2  14   0 311.431 53.2827   5
  -2  14  -1 132.569 38.0438   1
  -2  14  -1 119.960 38.1402   2
  -2  14  -1 86.0429 26.4917   5
  -2  14  -2 663.329 74.4311   1
  -2  14  -2 596.920 76.0552   2
  -2  14  -2 673.423 77.9201   5
  -2  14  -3 199.959 40.4342   1
  -2  14  -3 172.984 39.1298   2
  -2  14  -3 203.133 45.4732   5
  -2  14  -4 104.239 31.7773   5
  -2  14  -4 74.9178 26.7603   2
  -2  14  -4 96.3596 29.2170   1
  -2  14  -4 94.2331 36.8589   4
  -2  14  -5 208.072 52.2914   4
  -2  14  -5 233.595 38.4866   1
  -2  14  -6 476.966 76.1914   4
  -2  14  -6 515.673 58.5463   2
  -2  14  -6 623.643 59.2993   1
  -2  14  -7 64.9154 21.3444   1
  -2  14  -7 50.1719 16.6929   2
  -2  14  -7 50.8594 34.0696   4
  -2  14  -8 156.593 29.3718   2
  -2  14  -8 177.484 52.1420   4
  -2  14  -8 179.256 28.2992   1
  -2  14  -9 2584.97 98.3819   1
  -2  14  -9 2573.27 106.173   2
   2 -14   9 2769.55 191.791   5
  -2  14  -9 2833.99 191.488   4
  -2  14 -10 187.500 50.9173   4
   2 -14  10 147.516 50.8312   5
  -2  14 -10 137.965 20.0847   1
  -2  14 -10 162.029 23.6570   2
  -2  14 -11-26.5434 33.5009   4
  -2  14 -11 6.02336 6.41060   2
   2 -14  11-35.4125 34.1187   5
  -2  14 -11-0.84277 4.75939   2
   2 -14  12 19.8874 16.6457   5
  -2  14 -12 5.04465 23.2833   4
   2 -14  13 61.3236 28.3618   5
  -2  14 -13 143.181 47.8864   4
   2 -14  14-15.0132 28.3823   5
  -2  14 -14-33.1464 36.4959   4
  -2  14 -15 97.9029 46.0244   4
   2 -14  15 12.9889 24.8685   5
   2 -14  16 19.8936 27.4047   5
  -2  14 -16-8.94656 18.9503   4
  -2  14 -17 226.728 62.8368   4
   2 -14  17 252.804 63.5221   5
   2 -14  18 3.17709 23.5722   5
  -2  14 -18 16.3539 23.0315   4
   2 -14  19 7.37647 24.1863   5
  -2  14 -19 5.97371 22.6446   4
  -2  14 -20 71.7903 42.0489   4
   2 -14  20 77.9720 39.7138   5
  -2  14 -21 5.85361 23.4831   4
   2 -14  21-52.4807 37.0858   5
  -2  14 -22-2.93169 17.8671   4
  -2  14 -23-8.35006 21.8268   4
  -2  13  11 62.2286 42.0953   1
  -2  13  10-20.0354 27.5342   1
  -2  13   9 163.876 52.8905   1
  -2  13   8 37.4272 28.2930   1
  -2  13   7 65.2574 37.0943   1
  -2  13   6 617.687 89.8704   1
  -2  13   6 536.078 62.0422   5
  -2  13   5 30.6345 19.1306   5
  -2  13   5-44.6401 38.4278   1
  -2  13   4 3.26456 12.4071   5
  -2  13   4-40.5138 35.4129   1
  -2  13   3 1501.31 127.032   1
  -2  13   3 1444.11 104.697   5
  -2  13   2 68.0162 24.5544   5
  -2  13   2 19.3978 17.5217   1
  -2  13   1 375.910 57.6096   1
  -2  13   1 394.261 56.5824   5
  -2  13   0 325.178 54.1334   1
  -2  13   0 270.865 53.6919   2
  -2  13   0 272.738 47.2390   5
  -2  13  -1-2.95517 12.7823   5
  -2  13  -1-2.94329 14.1186   2
  -2  13  -1-5.00604 16.7553   1
  -2  13  -2 139.828 35.1507   5
  -2  13  -2 152.125 37.9229   2
  -2  13  -2 140.642 32.3816   1
  -2  13  -3 72.4963 20.9876   1
  -2  13  -3 128.060 35.6221   5
  -2  13  -3 119.901 31.9995   2
  -2  13  -4 315.653 52.9340   5
  -2  13  -4 347.861 47.9525   1
  -2  13  -4 344.561 65.0355   4
  -2  13  -5 135.785 42.1782   4
  -2  13  -5 160.690 38.5381   5
  -2  13  -5 110.407 28.0425   2
  -2  13  -5 119.540 26.1588   1
  -2  13  -6-2.20406 12.3941   5
  -2  13  -6-9.53991 16.7133   1
  -2  13  -6 2.06465 11.0747   2
  -2  13  -7 1240.32 78.9495   2
  -2  13  -7 1354.67 110.103   5
  -2  13  -7 1268.46 73.3624   1
  -2  13  -7 1246.77 123.405   4
  -2  13  -8 56.2821 16.7437   2
  -2  13  -8 67.3689 15.8420   1
  -2  13  -8 40.7121 25.6887   4
   2 -13   8 91.5579 39.6178   5
  -2  13  -9 387.292 36.6511   2
  -2  13  -9 377.538 71.3950   4
  -2  13  -9 434.294 35.6314   1
   2 -13   9 362.000 66.7757   5
  -2  13 -10 40.5334 21.5855   4
  -2  13 -10 5.49732 5.00882   2
   2 -13  10-32.7995 33.6319   5
   2 -13  11 466.566 77.0246   5
  -2  13 -11 393.968 73.6344   4
   2 -13  12 89.4291 39.3283   5
  -2  13 -12 81.9013 35.3985   4
  -2  13 -13 28.1240 24.6402   4
   2 -13  13-34.1057 31.2535   5
   2 -13  14 107.430 41.3864   5
  -2  13 -14 80.4066 40.8275   4
   2 -13  15 9.47095 25.4551   5
  -2  13 -15 50.8873 27.5186   4
   2 -13  16-60.3805 40.9763   5
  -2  13 -16-0.18658 25.2550   4
   2 -13  17-10.0220 22.1781   5
  -2  13 -17-19.4659 23.6091   4
  -2  13 -18 3.09488 31.5803   4
   2 -13  18-37.4516 32.4406   5
   2 -13  19 114.043 48.0710   5
  -2  13 -19 92.2548 36.2656   4
  -2  13 -20 53.2632 29.2731   4
   2 -13  20 53.0287 39.8633   5
  -2  13 -21 147.706 54.4744   4
  -2  13 -22 50.9996 26.3687   4
  -2  13 -23 160.201 52.6272   4
  -2  12  13-12.2245 40.0017   1
  -2  12  12 207.876 70.4696   1
  -2  12  11 186.684 56.1067   1
  -2  12  10 125.283 49.5428   1
  -2  12   9 39.7897 23.3832   1
  -2  12   8 14.7341 23.4840   1
  -2  12   7 146.587 30.9465   5
  -2  12   7 145.283 44.4096   1
  -2  12   6 11.9727 10.9815   5
  -2  12   6 66.8270 32.2629   1
  -2  12   5 135.001 31.4395   5
  -2  12   5 174.741 47.0339   1
  -2  12   4 155.672 35.0884   5
  -2  12   4 203.815 47.5534   1
  -2  12   3 41.2017 23.9974   1
  -2  12   3 101.215 28.5319   5
  -2  12   2 31.0389 15.9651   1
  -2  12   2 10.4413 11.5109   5
  -2  12   2-12.1293 16.6958   2
  -2  12   1 276.797 51.3082   1
  -2  12   1 282.584 56.7814   2
  -2  12   1 227.918 40.8782   5
  -2  12   0 32.1760 23.3268   1
  -2  12   0 11.4943 14.1828   2
  -2  12   0 34.9098 17.8782   5
  -2  12  -1 346.680 54.9492   2
  -2  12  -1 400.895 56.3244   5
  -2  12  -1 378.160 51.7965   1
  -2  12  -2 886.083 84.6078   5
  -2  12  -2 810.041 73.2222   1
  -2  12  -3 109.276 26.6525   1
  -2  12  -3 120.389 32.4363   5
  -2  12  -4-11.6643 16.7678   4
  -2  12  -4 13.2953 12.3283   1
  -2  12  -4 11.7029 13.9388   5
  -2  12  -4 15.9979 13.1882   2
  -2  12  -5 66.0668 19.9302   1
  -2  12  -5 65.2704 23.0066   2
  -2  12  -5 46.1402 25.5723   4
  -2  12  -5 73.7909 27.9159   5
  -2  12  -6 980.203 64.9138   1
  -2  12  -6 934.683 68.6184   2
  -2  12  -6 1045.70 105.970   4
  -2  12  -6 1130.19 97.5579   5
  -2  12  -7 1582.11 116.665   5
  -2  12  -7 1485.73 128.905   4
  -2  12  -7 1549.19 81.0333   2
  -2  12  -7 1515.33 73.0285   1
  -2  12  -8 212.365 27.9900   2
  -2  12  -8 396.983 70.3039   4
  -2  12  -8 244.169 26.2021   1
  -2  12  -8 256.992 45.8807   5
   2 -12   8 216.514 51.3471   5
  -2  12  -9 340.452 54.6984   5
  -2  12  -9 319.306 28.2979   2
  -2  12  -9 320.023 24.8493   1
  -2  12  -9 316.433 64.9822   4
   2 -12   9 347.697 65.2131   5
  -2  12 -10-14.4495 14.6039   5
  -2  12 -10-9.90581 19.6993   4
   2 -12  10-19.7561 26.3380   5
  -2  12 -11 14.2381 22.2185   4
   2 -12  11-2.20295 20.1043   5
  -2  12 -12 57.8897 33.9444   4
   2 -12  12-18.9226 33.7925   5
   2 -12  13 1653.94 144.878   5
  -2  12 -13 1588.17 145.264   4
  -2  12 -14 1133.50 124.664   4
   2 -12  14 1055.84 115.367   5
  -2  12 -15 79.1144 34.1507   4
   2 -12  15 82.5611 35.6469   5
   2 -12  16 12.3536 24.2958   5
  -2  12 -16 3.88404 20.5060   4
   2 -12  17 167.450 46.3913   5
  -2  12 -17 139.712 47.4324   4
  -2  12 -18 34.7084 31.1210   4
   2 -12  18 122.361 47.6758   5
  -2  12 -19 62.6830 33.9328   4
   2 -12  19 68.0266 37.1035   5
  -2  12 -20-6.96349 24.3803   4
   2 -12  20-3.64744 19.3862   5
  -2  12 -21-6.62911 21.4141   4
  -2  12 -22 12.3235 19.5250   4
  -2  12 -23-49.0630 31.8527   4
   2 -12  24 87.0010 66.3889   3
  -2  11  14-15.7981 31.8988   1
  -2  11  13 79.0060 52.4670   1
  -2  11  12 65.3749 35.1217   1
  -2  11  11 75.1303 37.0195   1
  -2  11  10 20.1265 23.3264   1
  -2  11   9-19.6174 26.1452   1
  -2  11   8 111.368 43.1157   1
  -2  11   8 34.3357 15.2469   5
  -2  11   7 12.7181 11.6670   5
  -2  11   7-1.63346 22.3451   1
  -2  11   6 233.224 39.5079   5
  -2  11   6 272.980 55.3330   1
  -2  11   5 612.823 82.4370   1
  -2  11   5 551.682 61.4174   5
  -2  11   4 41.8979 19.4261   5
  -2  11   4 25.3133 22.4712   1
  -2  11   3 221.686 45.3852   1
  -2  11   3 282.496 44.5221   5
  -2  11   3 253.360 53.2662   2
  -2  11   2 112.926 29.4563   5
  -2  11   2 103.876 34.8959   2
  -2  11   2 113.436 33.9909   1
  -2  11   1 294.782 54.1200   2
  -2  11   1 349.751 53.8004   1
  -2  11   1 287.783 47.5926   5
  -2  11   0 12.1249 16.5560   1
  -2  11   0 42.4421 24.7940   2
  -2  11   0 31.2527 19.3751   5
  -2  11  -1 728.983 70.4588   1
  -2  11  -1 697.509 72.2651   5
  -2  11  -2 48.8429 22.1832   1
  -2  11  -2 51.5205 24.4439   5
  -2  11  -3 582.361 61.0323   2
  -2  11  -3 583.960 57.2104   1
  -2  11  -3 610.628 67.7512   5
  -2  11  -4 1848.96 92.6593   1
  -2  11  -4 1791.75 117.975   5
  -2  11  -4 1684.74 98.0215   2
  -2  11  -5 79.6076 19.3219   1
  -2  11  -5 96.7206 28.8190   5
  -2  11  -5 69.6659 19.1556   2
  -2  11  -6-2.82648 7.18402   2
  -2  11  -6-18.4959 22.6126   4
  -2  11  -6-2.12747 15.8892   5
  -2  11  -6 7.72758 9.61400   1
  -2  11  -7 1468.39 123.677   4
  -2  11  -7 1246.95 67.7196   2
  -2  11  -7 1266.43 59.5185   1
  -2  11  -7 1348.30 105.038   5
  -2  11  -8 196.771 23.5894   2
  -2  11  -8 221.295 51.0304   4
  -2  11  -8 197.189 20.3069   1
  -2  11  -8 209.060 41.6694   5
  -2  11  -9 1011.94 91.4713   5
   2 -11   9 901.488 100.280   5
  -2  11  -9 979.657 105.691   4
  -2  11 -10 192.746 39.6228   5
   2 -11  10 116.976 36.7050   5
  -2  11 -10 154.231 45.0224   4
  -2  11 -11 461.137 63.3922   5
   2 -11  11 389.460 69.8081   5
  -2  11 -11 562.618 84.5821   4
  -2  11 -12 61.2749 27.1445   5
   2 -11  12 72.3638 30.4455   5
  -2  11 -12 49.5676 26.1221   4
  -2  11 -13 435.556 78.5315   4
   2 -11  13 311.428 62.7242   5
   2 -11  14 191.445 46.1644   5
  -2  11 -14 210.670 50.7682   4
   2 -11  14 165.522 43.0870   4
   2 -11  15 210.358 48.0734   4
   2 -11  15 135.757 42.0047   5
  -2  11 -15 218.871 55.2087   4
  -2  11 -16 378.394 73.5235   4
   2 -11  16 242.873 52.5651   4
   2 -11  16 266.715 60.2847   5
  -2  11 -17 249.999 61.7901   4
   2 -11  17 147.189 46.5316   5
   2 -11  17 258.471 55.6477   4
  -2  11 -18 57.2245 28.9514   4
   2 -11  18 39.4387 27.9636   5
   2 -11  19-23.3740 34.7209   5
  -2  11 -19 52.0862 36.0729   4
  -2  11 -20 225.977 58.8545   4
  -2  11 -21 65.6253 37.1417   4
  -2  11 -22-10.2124 22.3326   4
   2 -11  23 51.4805 59.5199   3
   2 -11  24 57.1338 58.5453   3
  -2  10  15 25.0505 30.7056   1
  -2  10  14 5.82707 24.6408   1
  -2  10  13-6.07082 26.5377   1
  -2  10  12 37.3322 42.1392   1
  -2  10  11 20.2848 21.5560   1
  -2  10  10 238.845 59.9965   1
  -2  10   9 44.5056 31.1689   1
  -2  10   9 51.2496 18.0224   5
  -2  10   8 438.980 51.3543   5
  -2  10   8 446.257 76.4476   1
  -2  10   7 992.554 77.8181   5
  -2  10   7 976.821 107.275   1
  -2  10   6 69.7006 34.7263   1
  -2  10   6 28.6915 13.9210   5
  -2  10   5 307.098 58.3177   1
  -2  10   5 216.531 38.3525   5
  -2  10   4 324.601 46.6562   5
  -2  10   4 392.549 67.1494   2
  -2  10   4 400.997 63.5372   1
  -2  10   3 69.8190 21.2617   5
  -2  10   3 121.774 37.1746   2
  -2  10   3 73.0323 30.5255   1
  -2  10   2 41.7062 21.2410   5
  -2  10   2 9.27379 17.0596   1
  -2  10   2 35.4339 23.6053   2
  -2  10   1 85.9757 27.6492   1
  -2  10   1 91.1340 24.6622   5
  -2  10   1 87.1155 27.4460   2
  -2  10   0 25.9756 10.5462   5
  -2  10   0 26.5360 19.7387   1
  -2  10  -1 218.592 38.4544   1
  -2  10  -1 195.228 39.2472   5
  -2  10  -2 561.973 54.4103   1
  -2  10  -2 584.830 60.4087   2
  -2  10  -2 550.773 63.6247   5
  -2  10  -3 455.820 51.2128   2
  -2  10  -3 574.838 64.3665   5
  -2  10  -3 518.410 48.6206   1
  -2  10  -4 20.7635 13.3426   1
  -2  10  -4 14.7991 13.5182   2
  -2  10  -4 14.0651 8.95490   5
  -2  10  -5 66.8888 24.2020   5
  -2  10  -5 25.9589 15.4203   2
  -2  10  -5 39.0894 11.9825   1
  -2  10  -6 347.334 30.8041   1
  -2  10  -6 330.695 33.8245   2
  -2  10  -6 349.756 52.4900   5
  -2  10  -7 316.035 30.3723   2
  -2  10  -7 329.486 26.4384   1
  -2  10  -7 383.557 64.7908   4
  -2  10  -7 418.738 55.7584   5
  -2  10  -8 185.841 15.0148   1
  -2  10  -8 220.601 40.4746   5
  -2  10  -8 213.892 47.8404   4
  -2  10  -8 192.950 18.2579   2
   2 -10   9 45.5676 26.1320   5
  -2  10  -9 40.7327 23.5892   4
  -2  10  -9 36.4802 17.1177   5
  -2  10 -10 101.407 38.0471   4
   2 -10  10 73.5412 28.8039   5
  -2  10 -10 101.532 29.6440   5
  -2  10 -11 22.7190 16.6189   5
  -2  10 -11 36.0596 25.6098   4
   2 -10  11-2.52663 16.1496   4
   2 -10  11 1.53567 21.7052   5
  -2  10 -12 46.8261 24.4463   4
   2 -10  12 6.57496 19.1513   5
   2 -10  12 79.0465 31.3419   4
  -2  10 -12 28.9193 21.3732   5
  -2  10 -13 50.1058 28.9688   4
  -2  10 -13 55.4895 23.3910   5
   2 -10  13 43.8285 22.3776   5
   2 -10  13 49.5808 27.7452   4
   2 -10  14 3.06405 22.4991   5
   2 -10  14 5.69109 16.4254   4
  -2  10 -14 42.4065 27.1400   4
   2 -10  15 106.231 40.1591   5
   2 -10  15 134.197 40.1057   4
  -2  10 -15 91.9531 36.4860   4
  -2  10 -16 224.805 53.6849   4
   2 -10  16 271.332 56.6198   4
   2 -10  16 276.846 60.1290   5
  -2  10 -17-28.4376 30.2171   4
   2 -10  17 2.34143 26.0942   4
   2 -10  17-31.3789 32.7024   5
   2 -10  18 212.894 51.8238   5
  -2  10 -18 200.884 52.8340   4
  -2  10 -19 2.72448 17.8081   4
  -2  10 -20-25.6376 24.3769   4
  -2  10 -21 0.17449 21.9510   4
   2 -10  22-10.1138 33.5440   3
   2 -10  23 38.1310 45.8143   3
  -2   9  16-27.5961 24.1145   1
  -2   9  15 19.5169 27.4917   1
  -2   9  14-57.3051 36.1172   1
  -2   9  13 24.9465 35.8216   1
  -2   9  12 170.008 54.3238   1
  -2   9  11 23.9347 31.8145   1
  -2   9  10 9.45366 7.30486   5
  -2   9  10 4.59192 27.8995   1
  -2   9   9 760.156 97.8471   1
  -2   9   9 755.325 65.7617   5
  -2   9   8 299.292 61.7921   1
  -2   9   8 213.811 36.0656   5
   2  -9  -7 98.5375 37.6244   2
  -2   9   7 51.8653 17.9323   5
  -2   9   7 12.1156 19.6698   1
   2  -9  -6 321.167 57.3809   2
  -2   9   6 285.019 43.2548   5
  -2   9   6 260.615 50.8940   1
  -2   9   5 847.180 73.6430   5
   2  -9  -5 997.785 94.6814   2
  -2   9   5 938.197 102.556   2
  -2   9   5 992.527 97.3302   1
  -2   9   4-15.6384 15.4371   5
  -2   9   4 10.7338 19.9310   2
   2  -9  -4 3.41211 13.9685   2
   2  -9  -3 375.857 55.6305   2
  -2   9   3 283.931 43.8397   5
  -2   9   3 289.025 51.0213   2
  -2   9   2 520.974 66.8055   2
   2  -9  -2 377.485 52.1502   2
  -2   9   2 538.674 59.8542   5
  -2   9   1 445.567 56.1754   5
   2  -9  -1 427.028 52.5937   2
  -2   9   0 1696.66 107.783   5
   2  -9   0 1767.21 102.371   2
  -2   9  -1 1062.83 84.3131   5
   2  -9   1 1104.55 76.9466   2
  -2   9  -1 1126.17 84.0012   2
  -2   9  -2 44.0050 20.2528   5
  -2   9  -2 2.89358 11.1951   2
  -2   9  -3 1428.53 99.1039   5
  -2   9  -3 1400.42 83.0191   2
  -2   9  -4 93.1946 20.5029   1
  -2   9  -4 100.818 27.9624   5
  -2   9  -4 82.5776 19.9684   2
  -2   9  -5 505.758 43.4011   2
  -2   9  -5 530.197 60.6254   5
  -2   9  -5 518.049 39.8303   1
  -2   9  -6 1082.80 56.6262   2
  -2   9  -6 1206.04 50.6862   1
  -2   9  -6 1272.22 93.1279   5
  -2   9  -7 559.245 33.3663   2
  -2   9  -7 596.100 29.4324   1
  -2   9  -7 581.702 64.9797   5
  -2   9  -8 37.4309 17.0384   5
   2  -9   9 2179.06 143.848   5
  -2   9  -9 2010.36 121.242   5
   2  -9   9 2066.52 132.333   4
  -2   9  -9 2055.10 144.286   4
   2  -9  10 539.832 69.7867   4
  -2   9 -10 609.297 82.3589   4
  -2   9 -10 698.701 72.0485   5
   2  -9  10 606.048 76.9637   5
  -2   9 -11 153.047 33.2294   5
   2  -9  11 107.757 30.5751   5
  -2   9 -11 140.764 39.5091   4
   2  -9  11 131.732 34.9307   4
  -2   9 -12-13.8183 15.4246   5
   2  -9  12 0.23672 14.5702   4
   2  -9  12 23.3495 21.4462   5
  -2   9 -12-15.4187 18.2345   4
   2  -9  13 49.9975 23.5612   4
  -2   9 -13 45.4817 18.4021   5
   2  -9  13 22.3072 17.4150   5
  -2   9 -13 64.8523 34.7550   4
   2  -9  14 106.261 34.8174   4
   2  -9  14 89.4917 32.9605   5
  -2   9 -14 143.646 42.6327   4
   2  -9  15-25.9085 29.0674   5
   2  -9  15-17.3009 16.6978   4
  -2   9 -15-37.5026 31.6723   4
  -2   9 -16 613.216 87.8367   4
   2  -9  16 630.804 85.5804   5
   2  -9  16 668.958 86.6742   4
   2  -9  17 300.953 61.2174   5
   2  -9  17 342.149 63.9956   4
  -2   9 -17 259.403 56.4098   4
   2  -9  18 8.03422 21.1928   4
  -2   9 -18 10.6349 16.4378   4
   2  -9  18 1.86305 4.93783   1
  -2   9 -19 14.2327 20.3765   4
  -2   9 -20-35.0159 24.9978   4
   2  -9  21 0.32618 26.8733   3
   2  -9  22 41.1856 59.3869   3
   2  -9  23 166.112 74.6715   3
  -2   8  17 54.5610 28.4034   1
  -2   8  16-16.2228 25.5194   1
  -2   8  15-23.3414 32.9664   1
  -2   8  14 430.430 84.4048   1
  -2   8  13 122.931 45.2891   1
  -2   8  12 698.461 94.9642   1
  -2   8  11 12.8637 11.6581   5
  -2   8  11-20.3257 32.0507   1
  -2   8  10 25.2096 12.8952   5
   2  -8 -10 38.7001 23.8152   2
  -2   8  10 11.4847 17.0133   1
   2  -8  -9 422.767 69.7449   2
  -2   8   9 456.086 79.4321   1
  -2   8   9 309.391 43.0658   5
   2  -8  -8 228.931 51.1181   2
  -2   8   8 279.816 42.6704   5
  -2   8   8 269.691 58.3917   1
   2  -8  -7 485.876 67.1856   2
  -2   8   7 412.640 51.3258   5
  -2   8   6-18.8955 17.2598   2
   2  -8  -6 10.5930 23.1379   2
  -2   8   6-6.87502 14.0603   5
  -2   8   5 566.765 76.4408   2
  -2   8   5 534.691 59.2061   5
   2  -8  -5 525.506 66.5364   2
   2  -8  -4-10.7688 22.5427   2
  -2   8   4 11.4730 9.27684   5
  -2   8   4 26.9573 23.2922   2
   2  -8  -3 817.552 76.0760   2
  -2   8   3 830.519 85.3322   2
  -2   8   3 903.300 77.2627   5
   2  -8  -2 76.6680 23.3152   2
  -2   8   2 66.0740 22.3101   5
  -2   8   1 170.896 34.6193   5
   2  -8  -1 173.288 33.3623   2
  -2   8   0 29.3759 16.0301   5
  -2   8   0 22.2506 16.9530   2
   2  -8   0 52.2082 22.7526   2
   2  -8   1 1164.07 72.9855   2
  -2   8  -1 992.785 76.1841   2
  -2   8  -1 1039.15 82.1842   5
   2  -8   2 2330.11 96.4319   2
  -2   8  -2 2170.89 104.512   2
  -2   8  -2 2236.40 121.455   5
  -2   8  -3 220.484 39.7243   5
   2  -8   3 209.482 27.8880   2
  -2   8  -3 235.400 32.9458   2
  -2   8  -4 3428.50 113.836   2
  -2   8  -4 3762.86 156.241   5
  -2   8  -5 520.412 58.5409   5
  -2   8  -5 483.649 39.1018   2
  -2   8  -6 36.2265 20.9293   5
  -2   8  -6 28.3581 9.90928   2
  -2   8  -7 3699.92 155.708   5
   2  -8   7 3394.75 162.094   4
   2  -8   8 3107.58 165.247   5
  -2   8  -8 2895.29 139.373   5
   2  -8   8 2935.56 154.022   4
   2  -8   9 85.4232 26.6504   5
   2  -8   9 103.846 31.8491   4
  -2   8  -9 99.5742 27.6153   5
  -2   8 -10 1772.66 110.454   5
   2  -8  10 1768.73 126.400   5
   2  -8  10 1689.14 122.939   4
  -2   8 -11 509.812 60.7519   5
   2  -8  11 505.586 70.3178   5
   2  -8  11 525.874 72.4873   4
  -2   8 -11 567.216 79.4611   4
  -2   8 -12 1091.71 89.3430   5
  -2   8 -12 1258.41 116.404   4
   2  -8  12 1184.97 107.580   4
   2  -8  12 1139.12 103.701   5
  -2   8 -13 18.0997 23.0479   4
   2  -8  13 30.7901 20.8702   4
   2  -8  13 14.2586 16.0466   5
  -2   8 -13-1.83449 11.6629   5
   2  -8  14 114.102 34.0639   4
   2  -8  14 145.186 39.9388   5
  -2   8 -14 129.347 36.0008   4
   2  -8  15 1208.88 116.642   4
   2  -8  15 1272.38 51.3884   1
   2  -8  15 1266.72 54.5056   2
   2  -8  15 1240.30 114.830   5
  -2   8 -15 1295.85 124.866   4
   2  -8  16 8.81299 12.6892   2
  -2   8 -16-4.61368 23.4159   4
   2  -8  16-15.4129 24.4503   5
   2  -8  16-5.02015 20.4983   4
   2  -8  16 5.48982 7.27965   1
  -2   8 -17 220.450 51.8985   4
   2  -8  17 280.340 36.5027   2
   2  -8  17 272.551 31.4810   1
   2  -8  17 199.828 48.9394   4
  -2   8 -18 145.446 44.8837   4
   2  -8  18 203.668 29.6745   1
   2  -8  18 167.408 49.1261   4
  -2   8 -19 17.3687 20.2384   4
   2  -8  20-27.7770 31.7639   3
   2  -8  21-31.5716 38.6051   3
   2  -8  22-50.0915 45.5453   3
   2  -8  23-12.9818 40.3826   3
  -2   7  18-46.1594 36.8920   1
  -2   7  17-28.9678 32.1852   1
  -2   7  16-0.40299 23.9652   1
  -2   7  15 243.659 64.8128   1
  -2   7  14-9.50679 30.2913   1
  -2   7  13-33.9495 33.1421   1
   2  -7 -12-3.08378 15.1874   2
  -2   7  12-32.3228 35.2141   1
  -2   7  12-10.1578 11.1514   5
   2  -7 -11 17.0192 22.0948   2
  -2   7  11 14.4977 21.9734   1
   2  -7 -10 1252.81 118.055   2
  -2   7  10 1303.06 125.706   1
   2  -7  -9 140.426 44.9999   3
   2  -7  -9 99.9916 40.3401   2
   2  -7  -8 229.599 51.1148   2
   2  -7  -7 60.6297 26.9159   2
  -2   7   7 131.720 48.4151   2
   2  -7  -6 18.4479 22.2524   2
  -2   7   6-7.82759 16.6392   2
   2  -7  -5 297.800 47.9412   2
   2  -7  -4 437.652 55.8690   2
   2  -7  -3 24.0838 17.8477   2
   2  -7  -2 2736.67 126.398   2
  -2   7   1 1259.71 89.0867   5
   2  -7  -1 1317.35 82.6199   2
  -2   7   1 1178.39 87.1745   2
  -2   7   0 1082.51 83.7151   5
   2  -7   0 1039.42 69.4496   2
  -2   7   0 974.185 75.5306   2
  -2   7  -1 1603.95 101.767   5
  -2   7  -1 1437.07 85.6277   2
   2  -7   1 1507.79 78.4257   2
  -2   7  -2 1010.80 79.6519   5
  -2   7  -2 1032.26 68.6729   2
   2  -7   2 1044.81 60.9094   2
  -2   7  -3 300.180 43.7531   5
   2  -7   3 259.021 28.7718   2
  -2   7  -3 247.476 31.7726   2
  -2   7  -4 5433.25 184.277   5
  -2   7  -4 5136.36 131.720   2
   2  -7   4 5265.10 111.991   2
  -2   7  -5 1391.18 91.5120   5
   2  -7   5 1494.13 101.912   4
  -2   7  -5 1366.14 59.0263   2
   2  -7   6 3439.71 156.353   4
  -2   7  -6 3403.01 143.160   5
  -2   7  -6 3272.41 81.4267   1
   2  -7   7 5484.30 203.862   4
  -2   7  -7 5589.76 183.518   5
   2  -7   8 22.6637 15.0751   4
  -2   7  -8 55.7746 21.6856   5
   2  -7   9 1763.87 120.073   5
  -2   7  -9 1648.21 102.391   5
   2  -7   9 1756.86 121.227   4
  -2   7 -10 292.714 43.6555   5
   2  -7  10 209.448 41.9289   4
   2  -7  10 271.560 47.2840   5
   2  -7  11 647.300 75.3411   5
  -2   7 -11 738.595 69.2828   5
   2  -7  11 708.043 80.4808   4
   2  -7  12 107.042 13.2489   1
  -2   7 -12 125.263 29.4504   5
   2  -7  12 170.670 38.0387   5
   2  -7  12 116.145 36.3975   4
  -2   7 -12 128.553 36.6875   4
  -2   7 -13 9.98878 18.8841   4
   2  -7  13 45.1237 13.0196   2
   2  -7  13 27.2775 21.7566   5
   2  -7  13 23.6399 11.0453   1
   2  -7  13-2.99755 16.0217   4
  -2   7 -14-8.84887 25.9727   4
   2  -7  14 49.9095 13.8734   1
   2  -7  14 19.0743 14.4398   5
   2  -7  14 44.7556 25.4396   4
   2  -7  14 40.4528 12.2943   2
   2  -7  15 234.488 31.8612   1
  -2   7 -15 159.603 42.6523   4
   2  -7  15 193.667 46.3522   4
   2  -7  15 194.068 28.8368   2
  -2   7 -16 812.635 98.7846   4
   2  -7  16 737.203 62.4797   2
   2  -7  16 759.622 57.7008   1
   2  -7  16 693.838 90.5447   4
   2  -7  17-20.3640 27.2879   4
  -2   7 -17-37.7483 31.3983   4
   2  -7  17 1.01205 9.19838   1
   2  -7  17-13.9542 14.6329   2
  -2   7 -18 280.376 59.9528   4
   2  -7  18 261.401 61.2218   4
   2  -7  18 288.246 40.6839   1
   2  -7  19 152.882 60.9326   3
   2  -7  19 95.2638 24.5179   1
   2  -7  20 60.5243 43.8786   3
   2  -7  21 12.5255 35.9823   3
   2  -7  22 27.9421 34.4924   3
   2  -7  23 38.2873 46.5014   3
  -2   6  19 78.6263 39.6647   1
  -2   6  18-24.9091 34.7487   1
  -2   6  17 172.298 58.9328   1
  -2   6  16-7.03721 23.9831   1
  -2   6  15 186.397 57.8862   1
   2  -6 -14-13.3827 26.2869   2
  -2   6  14 6.26041 30.5921   1
  -2   6  13 87.9402 38.7880   1
   2  -6 -13 73.7062 36.8478   2
   2  -6 -12 913.584 105.295   2
  -2   6  12 991.370 110.524   1
   2  -6 -11 785.926 93.8804   2
   2  -6 -10 451.723 82.5459   3
   2  -6 -10 504.053 72.8541   2
   2  -6  -9 1027.85 101.324   2
   2  -6  -9 1045.67 119.135   3
   2  -6  -8 194.986 44.6467   2
  -2   6   8 235.872 53.7903   2
   2  -6  -7 1013.14 91.6100   2
   2  -6  -6 1591.91 110.764   2
   2  -6  -5 512.135 62.1119   2
   2  -6  -4 2201.74 120.419   2
   2  -6  -3 2.01533 16.0106   2
  -2   6   2 150.183 32.7657   2
   2  -6  -2 157.980 33.6234   2
   2  -6  -1 196.844 35.4772   2
  -2   6   1 135.349 26.1816   2
   2  -6   0 1308.43 74.9382   2
  -2   6   0 1271.95 81.5576   2
  -2   6  -1 258.960 36.5955   2
   2  -6   1 175.826 26.1379   2
  -2   6  -1 208.382 36.3968   5
  -2   6  -2 1198.36 84.8057   5
   2  -6   2 1202.12 60.9923   2
  -2   6  -2 1241.46 71.3409   2
  -2   6  -3 2582.98 122.198   5
   2  -6   3 2476.54 78.6415   2
  -2   6  -3 2357.03 92.6745   2
  -2   6  -4 357.727 32.9888   2
   2  -6   4 439.823 28.8602   2
   2  -6   4 470.239 55.3788   4
  -2   6  -4 426.603 52.3234   5
  -2   6  -5 5710.71 181.560   5
   2  -6   5 5985.99 84.2117   2
  -2   6  -5 5917.56 110.019   2
   2  -6   5 5806.71 197.180   4
  -2   6  -6 1885.31 55.9308   1
   2  -6   6 1928.98 117.023   4
  -2   6  -6 1852.59 102.292   5
  -2   6  -7 52.9001 19.5054   5
   2  -6   7 40.8964 22.1910   4
  -2   6  -7 22.8038 15.1752   4
  -2   6  -8 11.6012 13.5158   5
   2  -6   8 7.42068 16.3460   4
   2  -6   9 531.605 68.3409   4
  -2   6  -9 515.361 54.9417   5
  -2   6 -10 33.4751 21.6432   5
   2  -6  10 16.0674 5.80401   1
   2  -6  10 28.1238 18.1392   4
   2  -6  11 187.686 42.4445   4
   2  -6  11 242.095 23.2288   2
  -2   6 -11 232.634 38.0667   5
   2  -6  11 256.030 26.6671   1
   2  -6  12 162.934 38.7894   4
   2  -6  12 245.658 29.7177   1
  -2   6 -12 171.530 33.7135   5
   2  -6  12 182.336 23.0539   2
  -2   6 -12 139.015 42.5225   4
  -2   6 -13 100.093 35.3676   4
   2  -6  13 148.503 25.9945   1
   2  -6  13 118.367 21.7591   2
   2  -6  13 127.388 39.3317   4
   2  -6  14 34.6379 15.7707   2
  -2   6 -14-7.28305 26.3628   4
   2  -6  14 18.0915 12.6930   1
   2  -6  14 10.9174 23.8767   4
  -2   6 -15 52.5793 24.4763   4
   2  -6  15 83.0090 20.4117   1
   2  -6  15 67.1012 22.7446   2
   2  -6  15 45.4377 24.8521   4
  -2   6 -16 438.497 71.7005   4
   2  -6  16 550.891 55.0388   1
   2  -6  16 521.516 60.1170   2
   2  -6  16 605.388 86.0682   4
   2  -6  17 29.6350 27.7937   3
   2  -6  17-4.50351 12.6574   1
   2  -6  17-47.6711 33.2510   4
   2  -6  17 13.0742 17.4645   2
   2  -6  18-17.6031 34.2037   4
   2  -6  18-29.8251 35.6158   3
   2  -6  18-0.78632 12.8826   1
   2  -6  18 11.3316 20.7609   2
   2  -6  19 139.030 61.6130   3
   2  -6  19 209.042 40.7502   1
   2  -6  20 311.760 90.5813   3
   2  -6  21-1.29140 32.5882   3
   2  -6  22 15.4164 29.7137   3
   2  -6  23 14.1563 40.6441   3
  -2   5  19 17.4498 17.5279   1
  -2   5  18 23.9992 23.0294   1
  -2   5  17-0.95316 23.2044   1
   2  -5 -16 0.70716 27.2903   2
  -2   5  16 2.87713 19.3744   1
  -2   5  15 105.996 42.4707   1
   2  -5 -15 90.3201 35.5933   2
  -2   5  14 197.795 54.1509   1
   2  -5 -14 117.636 39.3277   2
   2  -5 -13-1.16442 17.7669   2
   2  -5 -12 49.9715 24.9306   2
   2  -5 -11 714.238 102.044   3
   2  -5 -11 845.485 96.9662   2
   2  -5 -10 1104.82 123.605   3
   2  -5 -10 1278.34 112.567   2
   2  -5  -9 175.122 48.6690   3
   2  -5  -9 118.190 34.0058   2
  -2   5   9 147.342 42.1771   2
   2  -5  -8 994.893 106.168   3
   2  -5  -8 1067.87 95.8916   2
   2  -5  -7 710.226 76.9821   2
   2  -5  -6 51.8056 26.5961   2
   2  -5  -5 2226.23 120.433   2
   2  -5  -4 828.763 72.0288   2
   2  -5  -3 2136.48 110.179   2
   2  -5  -2 1746.64 93.1957   2
  -2   5   2 1707.86 102.719   2
   2  -5  -1 3908.26 131.679   2
  -2   5   1 3908.55 147.305   2
  -2   5   1 4161.39 148.071   4
  -2   5   0 1212.09 81.4405   4
   2  -5   0 1225.14 69.3223   2
  -2   5   0 1136.52 75.0906   2
  -2   5  -1 285.887 42.0485   4
   2  -5   1 330.192 33.3793   2
  -2   5  -1 322.319 38.4499   2
   2  -5   2 11.0067 13.8209   4
  -2   5  -2 3.98166 10.1301   2
   2  -5   2 6.87057 7.81732   2
  -2   5  -3 621.083 45.7804   2
   2  -5   3 666.539 62.7269   4
   2  -5   3 724.293 40.7015   2
  -2   5  -3 744.655 65.3161   5
  -2   5  -4 277.493 26.9648   2
   2  -5   4 260.283 21.2816   2
  -2   5  -4 265.086 38.4320   5
   2  -5   4 364.066 49.0743   4
   2  -5   5 113.797 28.3254   4
  -2   5  -5 94.8199 16.2103   1
  -2   5  -5 106.873 26.8116   5
   2  -5   5 101.655 11.0849   2
  -2   5  -6 4048.66 82.4728   1
  -2   5  -6 3806.88 142.385   5
   2  -5   6 4188.82 170.814   4
  -2   5  -6 4253.63 177.386   4
   2  -5   7 1980.67 122.818   4
  -2   5  -7 2261.86 107.762   5
  -2   5  -7 2209.46 133.348   4
  -2   5  -7 2169.22 55.0103   1
  -2   5  -8 572.703 69.7864   4
   2  -5   8 594.906 38.2392   1
   2  -5   8 620.773 26.2901   2
  -2   5  -8 666.714 59.1431   5
  -2   5  -8 631.722 31.6770   1
   2  -5   8 661.528 73.8524   4
   2  -5   9 217.413 19.5426   2
  -2   5  -9 221.485 34.3561   5
   2  -5   9 157.806 39.4432   4
   2  -5   9 238.810 25.1102   1
   2  -5  10 151.575 21.5595   1
  -2   5 -10 146.429 28.3737   5
   2  -5  10 121.459 33.7815   4
   2  -5  10 117.162 16.4892   2
   2  -5  11 555.208 73.8050   4
   2  -5  11 592.661 46.7787   1
   2  -5  11 548.366 41.4628   2
  -2   5 -11 545.217 54.4806   5
   2  -5  12 1041.11 64.1389   2
   2  -5  12 1037.79 65.1564   1
   2  -5  12 1210.81 111.542   4
  -2   5 -12 1146.56 79.7501   5
  -2   5 -12 1041.88 100.887   4
  -2   5 -13 697.084 83.3029   4
   2  -5  13 781.946 92.2237   4
   2  -5  13 696.446 58.1800   2
   2  -5  13 702.502 57.2803   1
   2  -5  14 2675.92 117.832   1
   2  -5  14 2800.04 126.534   2
   2  -5  14 3045.61 185.807   4
  -2   5 -14 2818.38 172.524   4
   2  -5  15 583.091 57.5995   1
   2  -5  15 645.898 65.2779   2
  -2   5 -15 591.682 80.7392   4
   2  -5  15 634.327 86.8576   4
   2  -5  16 44.2223 25.7815   3
   2  -5  16 7.44767 15.7289   2
   2  -5  16 73.4945 34.4126   4
   2  -5  16 38.9474 19.8602   1
   2  -5  17-15.4261 28.6537   3
   2  -5  17-3.13576 18.7153   4
   2  -5  17 31.6648 17.5297   1
   2  -5  17 17.8991 17.6776   2
   2  -5  18 12.6855 25.6204   3
   2  -5  18 8.69924 21.3829   2
   2  -5  18 12.0984 13.8668   1
   2  -5  19 52.1025 42.7140   3
   2  -5  19 74.8920 24.7865   1
   2  -5  20 3.06611 32.3405   3
   2  -5  20 7.42048 19.9369   1
   2  -5  21-16.2868 27.1217   3
   2  -5  22-47.0417 43.0797   3
   2  -5  23 148.675 90.9337   3
  -2   4  20 24.0504 32.9013   1
  -2   4  19 142.649 53.1867   1
  -2   4  18 12.7823 23.8255   1
   2  -4 -17 32.5143 21.9420   2
  -2   4  17 8.65638 21.4570   1
  -2   4  16 9.35792 29.3905   1
   2  -4 -16-11.8570 17.7856   2
  -2   4  15 25.6826 29.4455   1
   2  -4 -15 59.7565 35.3091   2
   2  -4 -14 70.2521 35.0247   2
   2  -4 -13-10.3128 16.8836   2
   2  -4 -12 793.803 90.7351   2
   2  -4 -12 819.512 110.902   3
   2  -4 -11 313.668 68.4138   3
   2  -4 -11 297.749 55.8464   2
  -2   4  10 210.747 52.6676   2
   2  -4 -10 252.554 59.5692   3
   2  -4 -10 194.051 46.0277   2
   2  -4  -9-0.27645 13.1147   3
   2  -4  -9-19.3957 18.5400   2
  -2   4   9 17.5242 24.9339   2
   2  -4  -8 18.1245 18.8704   2
   2  -4  -8 45.1377 24.4455   3
   2  -4  -7 47.5525 23.9529   2
   2  -4  -6 934.832 81.1912   2
   2  -4  -5 3795.76 156.310   2
   2  -4  -4 3718.49 147.795   2
   2  -4  -3 25.3446 14.5033   2
   2  -4  -2 1077.52 72.4338   2
  -2   4   2 1027.96 78.7545   2
  -2   4   2 1215.88 75.9030   4
   2  -4  -1 892.953 62.7380   2
  -2   4   1 977.670 71.6514   2
  -2   4   1 924.460 68.3456   4
  -2   4   0 4805.35 150.191   2
   2  -4   0 5017.11 137.497   2
  -2   4   0 5006.31 159.767   4
   2  -4   1 8183.59 164.403   2
  -2   4  -1 7700.57 179.105   2
   2  -4   1 8134.87 197.284   4
  -2   4  -1 8485.03 214.289   4
   2  -4   2 752.120 61.9756   4
   2  -4   2 721.449 46.7420   2
  -2   4  -2 647.482 48.3622   2
   2  -4   3 2701.92 122.488   4
   2  -4   3 2882.36 84.5630   2
  -2   4  -3 2735.23 92.4707   2
  -2   4  -4 34.1794 17.5997   5
  -2   4  -4 25.5954 11.6929   1
   2  -4   4 33.2247 10.3065   2
   2  -4   4 23.2378 11.7394   4
   2  -4   5 407.642 51.5171   4
  -2   4  -5 418.763 54.0733   4
  -2   4  -5 401.512 43.9749   5
   2  -4   5 461.742 30.9102   2
  -2   4  -5 422.346 32.6831   1
   2  -4   6 251.664 43.6817   4
   2  -4   6 317.021 30.3720   1
  -2   4  -6 283.855 23.6506   1
  -2   4  -6 283.812 37.9407   5
  -2   4  -6 331.170 48.1615   4
   2  -4   7 2.34785 18.0538   4
   2  -4   7 34.8623 15.0723   1
  -2   4  -7 21.2330 17.6925   4
  -2   4  -7 10.7734 9.74095   5
  -2   4  -7 28.6361 6.87447   1
   2  -4   8 4912.42 126.691   1
   2  -4   8 4868.27 98.8326   2
  -2   4  -8 4631.69 103.653   1
   2  -4   8 5235.63 206.272   4
  -2   4  -8 4798.06 196.863   4
  -2   4  -8 4738.02 149.160   5
  -2   4  -9 268.626 36.2523   5
   2  -4   9 297.344 28.1762   2
   2  -4   9 277.362 31.9920   1
   2  -4   9 292.987 48.6635   4
   2  -4  10 28.5446 9.11726   1
  -2   4 -10 72.0094 20.0726   5
   2  -4  10 56.4626 15.2532   2
   2  -4  10 28.5071 14.5330   4
   2  -4  11 254.406 51.4497   4
   2  -4  11 272.518 33.2239   2
   2  -4  11 300.678 36.6276   1
  -2   4 -11 260.847 35.6956   5
   2  -4  12 1198.25 76.1896   1
   2  -4  12 1236.95 113.498   4
  -2   4 -12 1194.29 109.567   4
   2  -4  12 1271.15 76.5163   2
  -2   4 -13 172.372 44.0093   4
   2  -4  13 161.828 29.0582   1
   2  -4  13 244.086 53.3009   4
   2  -4  13 183.221 32.2726   2
   2  -4  14 129.414 35.7250   4
   2  -4  14 109.700 44.3240   3
   2  -4  14 86.9377 21.7117   1
   2  -4  14 114.407 27.1862   2
   2  -4  15 235.149 69.3316   3
   2  -4  15 260.975 44.1341   2
   2  -4  15 260.152 42.8100   1
   2  -4  15 186.687 50.4423   4
   2  -4  16 253.001 75.1128   3
   2  -4  16 364.664 57.3827   2
   2  -4  16 323.273 48.7422   1
   2  -4  16 290.951 62.0792   4
   2  -4  17 443.352 65.7135   2
   2  -4  17 456.590 97.4368   3
   2  -4  17 394.580 54.8453   1
   2  -4  17 406.188 76.0470   4
   2  -4  18-15.8687 30.6015   3
   2  -4  18-37.6882 22.2482   2
   2  -4  18-3.00639 12.5364   1
   2  -4  19-16.9236 42.7439   3
   2  -4  19-11.3343 22.7558   1
   2  -4  20-32.9245 28.0028   3
   2  -4  20-7.41363 14.5967   1
   2  -4  21 48.2355 30.7269   3
   2  -4  22 95.9721 65.8540   3
  -2   3  21-64.3213 38.8358   1
  -2   3  20 17.3707 31.1030   1
  -2   3  19-8.59741 18.9682   1
  -2   3  18 9.93704 22.4153   1
   2  -3 -18-23.2153 38.7748   2
  -2   3  17 14.0089 20.6348   1
   2  -3 -17 69.5301 38.5558   2
   2  -3 -16 65.2776 38.2846   2
  -2   3  16 53.8967 32.0129   1
   2  -3 -15 39.0954 25.7221   2
   2  -3 -14 279.400 58.6400   2
   2  -3 -13 842.729 112.053   3
   2  -3 -13 731.291 88.8549   2
   2  -3 -12 174.400 52.2044   3
   2  -3 -12 128.249 35.4707   2
  -2   3  11 21.7471 29.6380   2
   2  -3 -11 40.3223 25.3367   2
   2  -3 -11 28.0035 27.3578   3
   2  -3 -10 430.768 71.6649   3
   2  -3 -10 519.827 68.0805   2
  -2   3  10 530.947 79.9694   2
   2  -3  -9 967.159 89.5495   2
   2  -3  -9 988.931 99.5756   3
   2  -3  -8 815.919 87.5368   3
   2  -3  -8 755.322 76.2080   2
   2  -3  -7 406.973 53.5808   2
   2  -3  -6 1437.19 98.2911   2
   2  -3  -5 246.843 42.6722   2
   2  -3  -4 2272.08 112.599   2
   2  -3  -3 1986.41 102.086   2
  -2   3   3 1719.25 103.570   2
  -2   3   3 1917.09 88.4264   4
   2  -3  -2 5.66564 16.8292   2
  -2   3   2 13.4163 13.6609   4
  -2   3   2-16.1037 18.0277   2
  -2   3   1 4113.39 134.742   4
  -2   3   1 3882.76 140.395   2
   2  -3  -1 4214.86 135.343   2
   2  -3   0 10943.9 208.273   2
   2  -3   0 11090.6 216.659   4
  -2   3   0 11394.6 232.526   4
  -2   3   0 10755.9 219.167   2
  -2   3  -1 4460.70 151.228   4
   2  -3   1 4311.28 123.445   2
  -2   3  -1 4173.74 128.200   2
   2  -3   1 4499.92 141.752   4
   2  -3   2 37488.6 344.016   2
  -2   3  -2 36570.1 360.833   2
   2  -3   2 37214.4 429.446   4
  -2   3  -3 7872.57 157.143   1
   2  -3   3 8426.33 214.161   4
   2  -3   3 8456.03 157.405   2
   2  -3   4 4155.75 114.899   1
  -2   3  -4 4004.70 107.552   1
   2  -3   4 4388.91 110.830   2
   2  -3   4 4081.33 155.545   4
   2  -3   5 456.722 38.8367   1
  -2   3  -5 473.574 34.9140   1
  -2   3  -5 532.278 50.0679   5
   2  -3   5 466.927 56.2742   4
  -2   3  -5 439.124 52.7554   4
  -2   3  -6 5108.23 188.600   4
   2  -3   6 4959.89 188.021   4
   2  -3   6 5203.17 132.978   1
  -2   3  -6 5073.74 148.824   5
  -2   3  -6 4821.29 109.913   1
  -2   3  -7 194.733 39.9270   4
  -2   3  -7 206.164 30.5593   5
   2  -3   7 236.173 44.3588   4
   2  -3   7 198.306 26.7199   1
  -2   3  -7 206.837 24.6514   1
  -2   3  -8 357.709 55.2289   4
  -2   3  -8 366.077 39.1023   5
   2  -3   8 346.403 30.7749   2
   2  -3   8 319.693 32.9030   1
   2  -3   8 469.164 61.6154   4
  -2   3  -8 440.559 36.3969   1
   2  -3   9 2286.77 97.2766   1
   2  -3   9 2377.70 88.3342   2
  -2   3  -9 2176.95 95.7279   5
  -2   3  -9 2304.59 89.0833   1
   2  -3   9 2109.69 136.686   4
   2  -3  10-1.25119 18.3043   4
   2  -3  10 12.7497 10.5419   2
  -2   3 -10 12.8632 11.3706   5
   2  -3  10 2.22050 8.68506   1
   2  -3  11 169.562 29.6138   1
  -2   3 -11 142.346 25.1439   5
   2  -3  11 168.133 41.9030   4
   2  -3  11 153.108 27.2215   2
  -2   3 -12 1013.33 98.2580   4
   2  -3  12 1097.36 77.0332   2
   2  -3  12 988.370 74.0288   1
   2  -3  12 1068.54 127.785   3
   2  -3  12 1138.90 109.860   4
   2  -3  13 287.591 70.6238   3
   2  -3  13 299.948 43.8096   1
   2  -3  13 213.949 36.1115   2
   2  -3  13 284.736 57.3685   4
   2  -3  14 3.26458 10.4228   1
   2  -3  14-0.95306 10.8255   2
   2  -3  14 2.67524 18.1480   4
   2  -3  14 3.37623 26.0805   3
   2  -3  15 430.065 91.4697   3
   2  -3  15 385.614 56.0188   2
   2  -3  15 317.063 64.2370   4
   2  -3  15 373.003 52.1558   1
   2  -3  16 44.1014 25.3442   2
   2  -3  16 55.9774 46.2289   3
   2  -3  16 3.02276 14.4692   1
   2  -3  16 41.7265 30.9755   4
   2  -3  17 503.793 70.9009   2
   2  -3  17 483.112 103.956   3
   2  -3  17 510.185 65.8160   1
   2  -3  18-83.3609 35.0996   2
   2  -3  18-3.22822 12.3127   1
   2  -3  18-24.2245 36.9760   3
   2  -3  19 12.7731 36.7384   3
   2  -3  19 5.64555 12.0817   1
   2  -3  20-100.740 57.1081   3
   2  -3  20-12.3054 18.2331   1
   2  -3  21 22.2815 38.1827   3
   2  -3  22-61.4626 52.2528   3
  -2   2  22-39.0113 35.5750   1
  -2   2  21 25.6891 28.4511   1
  -2   2  20-1.72276 18.4710   1
   2  -2 -20 13.6987 25.5982   2
   2  -2 -19 83.3052 37.1673   2
  -2   2  19 165.165 50.6152   1
  -2   2  18-40.4352 34.6769   1
   2  -2 -18 0.50727 19.5182   2
   2  -2 -17 170.297 48.7895   2
  -2   2  16 52.2379 22.0556   4
   2  -2 -16 30.5120 19.2130   2
  -2   2  15 29.1188 22.5054   4
   2  -2 -15-4.64492 20.7228   2
   2  -2 -14 924.614 100.870   2
   2  -2 -13 719.079 100.962   3
   2  -2 -13 881.452 96.1027   2
   2  -2 -12 53.9933 28.1183   3
   2  -2 -12 18.6811 16.7556   2
  -2   2  12 64.9443 35.1242   2
  -2   2  11 17.6360 17.5786   2
   2  -2 -11 21.1917 22.8918   3
   2  -2 -11-9.97094 17.1500   2
   2  -2 -10 184.387 39.4207   2
   2  -2 -10 185.278 44.1435   3
  -2   2  10 228.605 51.5961   2
   2  -2  -9 809.311 87.9171   3
   2  -2  -9 916.102 84.5418   2
   2  -2  -8 2157.93 132.077   3
   2  -2  -8 2402.40 134.206   2
   2  -2  -7 472.062 59.8714   3
   2  -2  -7 540.345 61.4951   2
   2  -2  -6 1548.67 100.740   2
   2  -2  -5 531.090 56.4628   2
   2  -2  -4 496.626 54.7839   2
  -2   2   4 434.900 38.9609   4
   2  -2  -3 2645.65 117.327   2
  -2   2   3 2539.29 93.6538   4
  -2   2   3 2551.26 121.947   2
  -2   2   2 5217.12 138.208   4
  -2   2   2 5015.11 164.730   2
   2  -2  -2 5170.45 158.708   2
   2  -2  -2 5125.20 128.108   4
   2  -2  -1 4142.39 122.050   4
   2  -2  -1 4187.83 137.500   2
  -2   2   1 3939.67 137.597   2
  -2   2   1 3938.22 125.730   4
   2  -2   0 33227.5 368.037   2
  -2   2   0 32103.9 376.747   2
   2  -2   0 32684.2 361.471   4
  -2   2   0 32982.9 382.592   4
   2  -2   1 14388.5 231.411   2
   2  -2   1 13877.5 250.640   4
  -2   2  -1 13954.3 237.175   2
  -2   2  -2 312.030 33.4490   1
   2  -2   2 336.931 36.2013   2
   2  -2   2 317.893 37.9610   4
   2  -2   3 9446.14 228.327   4
   2  -2   3 10232.5 187.789   1
  -2   2  -3 9962.14 181.190   1
   2  -2   4 635.344 61.2347   4
   2  -2   4 742.278 51.3557   1
  -2   2  -4 696.339 45.8600   1
  -2   2  -5 1130.73 69.8617   5
  -2   2  -5 1053.90 84.8491   4
   2  -2   5 1095.73 63.2441   1
  -2   2  -5 1062.39 56.0304   1
   2  -2   5 1221.63 88.7500   4
  -2   2  -6-7.96237 19.9529   4
   2  -2   6-0.92496 9.44675   1
  -2   2  -6 12.5637 11.6210   1
  -2   2  -6-2.36106 9.05891   5
   2  -2   6 9.05665 16.1612   4
  -2   2  -7 7.97238 16.4951   4
  -2   2  -7 24.3008 10.5601   1
   2  -2   7 43.4570 16.1113   1
  -2   2  -7 20.3055 13.0062   5
   2  -2   7 34.6082 21.7838   4
  -2   2  -8 134.840 35.1551   4
   2  -2   8 123.174 21.5374   2
  -2   2  -8 149.975 23.7076   5
   2  -2   8 118.159 26.3737   1
  -2   2  -8 133.849 22.7610   1
   2  -2   8 142.975 37.3691   4
   2  -2   9 2769.06 115.402   1
  -2   2  -9 2987.23 104.403   5
  -2   2  -9 2915.41 109.677   1
   2  -2   9 2995.91 109.735   2
   2  -2   9 3174.75 167.405   4
  -2   2 -10 16.6095 10.9069   5
   2  -2  10 7.02611 8.66128   2
   2  -2  10 16.2002 14.0646   1
   2  -2  10 23.0543 23.8368   4
   2  -2  11 7.85032 21.1440   3
   2  -2  11 13.7730 12.8768   2
   2  -2  11-12.3930 14.8202   1
   2  -2  11 19.9892 20.9210   4
   2  -2  12 16.8217 13.8769   2
   2  -2  12 21.8195 20.1261   3
   2  -2  12 49.2734 26.4044   4
   2  -2  12 17.4870 17.5336   1
   2  -2  13 249.750 41.8585   1
   2  -2  13 290.815 71.1805   3
   2  -2  13 237.620 54.7709   4
   2  -2  13 218.426 40.2775   2
   2  -2  14 181.256 37.3413   1
   2  -2  14 128.593 50.6172   3
   2  -2  14 196.067 39.5759   2
   2  -2  14 137.933 43.5858   4
   2  -2  15 122.055 35.0381   1
   2  -2  15 125.184 53.5542   3
   2  -2  15 143.414 37.2006   2
   2  -2  15 203.809 51.4604   4
   2  -2  16 49.3120 40.7682   3
   2  -2  16 44.8622 24.6399   2
   2  -2  16 26.2367 22.8525   1
   2  -2  16 90.4783 41.1243   4
   2  -2  17 23.0081 18.3217   1
   2  -2  17 98.4078 51.4483   3
   2  -2  17 62.5219 29.3459   2
   2  -2  18 26.2398 27.6146   3
   2  -2  18 59.0801 31.7398   1
   2  -2  19 3.35321 27.2568   3
   2  -2  19 92.7940 33.2437   1
   2  -2  20 8.46165 25.4793   3
   2  -2  20 23.3169 21.6576   1
   2  -2  21 16.6094 16.3122   1
   2  -2  21-52.7047 46.8953   3
  -2   1  23 20.2731 25.8977   1
  -2   1  22 48.4230 35.0907   1
  -2   1  21 56.7825 36.6544   1
   2  -1 -21-66.8222 36.1718   2
  -2   1  20-43.4002 22.4920   1
   2  -1 -20 5.41326 31.9656   2
  -2   1  19 78.0412 38.3346   1
   2  -1 -19 52.2548 29.4377   2
   2  -1 -18 38.6147 26.2386   2
   2  -1 -17 164.524 45.7450   2
   2  -1 -16 155.758 45.5375   2
  -2   1  16 207.753 38.9678   4
  -2   1  15 85.2279 23.5007   4
   2  -1 -15 29.6927 21.5873   2
  -2   1  14 73.6018 22.4792   4
   2  -1 -14 51.1175 23.2669   2
   2  -1 -13 546.289 73.2260   2
  -2   1  13 487.434 83.0600   2
  -2   1  12 126.146 43.9508   2
   2  -1 -12 138.330 37.6134   2
   2  -1 -11 492.851 73.2919   3
  -2   1  11 580.493 84.7495   2
   2  -1 -11 541.858 68.3946   2
   2  -1 -10 2596.93 154.745   3
   2  -1 -10 3006.77 155.377   2
  -2   1  10 3036.52 181.993   2
   2  -1  -9 637.001 70.8421   2
   2  -1  -9 599.314 72.7958   3
  -2   1   9 685.228 80.8996   2
   2  -1  -8 639.484 67.3772   3
   2  -1  -8 660.074 68.4849   2
   2  -1  -7 9767.90 258.032   2
   2  -1  -7 9285.45 234.931   3
   2  -1  -6 89.2075 21.7687   3
   2  -1  -6 47.1239 21.2369   2
   2  -1  -5 613.592 63.0291   2
  -2   1   5 740.483 45.3701   4
  -2   1   4 5358.32 123.008   4
   2  -1  -4 5548.31 178.333   2
   2  -1  -3 58.9309 23.3336   2
  -2   1   3 47.8849 12.3893   4
   2  -1  -3 56.5729 12.9115   4
   2  -1  -2 14373.1 267.501   2
  -2   1   2 13033.6 263.260   2
  -2   1   2 13914.5 214.912   4
   2  -1  -2 13602.5 204.257   4
  -2   1   1 38212.0 435.186   2
   2  -1  -1 40518.1 427.261   2
   2  -1  -1 38997.9 369.891   4
  -2   1   1 39932.7 385.623   4
   2  -1   0 178.363 29.1768   4
   2  -1   0 121.088 24.9865   2
  -2   1   0 144.673 24.4835   2
  -2   1   0 146.732 26.5291   1
  -2   1   0 169.838 29.1371   4
   2  -1   1 1061.21 68.2648   2
  -2   1  -1 1099.74 65.3253   1
   2  -1   1 1020.13 63.2478   1
   2  -1   1 1072.27 69.9550   4
   2  -1   2 65746.3 498.197   1
  -2   1  -2 64031.6 492.114   1
   2  -1   2 65340.3 576.406   4
   2  -1   3 740.622 54.6218   1
  -2   1  -3 733.826 50.0672   1
   2  -1   3 791.283 66.9708   4
  -2   1  -4 973.526 57.3568   1
   2  -1   4 995.733 77.9646   4
   2  -1   4 953.449 63.1935   1
   2  -1   5 344.867 47.6594   4
  -2   1  -5 324.489 33.8315   1
  -2   1  -5 322.970 46.3152   4
   2  -1   5 272.251 35.8318   1
  -2   1  -6 65.0441 19.0288   4
   2  -1   6 33.3944 16.6712   1
  -2   1  -6 45.6068 13.0540   5
  -2   1  -6 25.8501 9.06571   1
   2  -1   6 46.7137 24.3288   4
   2  -1   7 2542.30 110.155   1
   2  -1   7 2529.59 142.278   4
  -2   1  -7 2517.97 99.7244   1
  -2   1  -7 2560.47 91.0236   5
  -2   1  -7 2495.09 136.906   4
   2  -1   8 1248.49 79.2575   1
   2  -1   8 1330.24 74.4885   2
  -2   1  -8 1182.75 60.3066   5
  -2   1  -8 1177.02 71.5306   1
   2  -1   8 1125.47 99.2311   4
   2  -1   9 1631.70 93.6476   1
   2  -1   9 1593.97 87.9352   2
  -2   1  -9 1476.65 67.7590   5
  -2   1  -9 1484.65 86.0880   1
   2  -1   9 1578.83 121.409   4
   2  -1  10 1656.12 94.2100   2
   2  -1  10 1700.20 129.708   4
  -2   1 -10 1641.99 70.8220   5
   2  -1  10 1745.85 101.704   1
   2  -1  11 945.816 101.302   4
   2  -1  11 1031.05 124.712   3
   2  -1  11 968.443 76.1198   2
   2  -1  11 883.870 76.5169   1
   2  -1  12 0.75294 12.0797   1
   2  -1  12 1.00473 10.4086   2
   2  -1  12-6.27911 26.3775   3
   2  -1  12-3.10975 19.5921   4
   2  -1  13 121.474 34.0984   1
   2  -1  13 35.1997 31.6150   3
   2  -1  13 53.0056 21.7582   2
   2  -1  13 111.326 39.2908   4
   2  -1  14 252.647 47.1534   1
   2  -1  14 261.576 47.3205   2
   2  -1  14 264.692 70.2653   3
   2  -1  14 302.029 64.0392   4
   2  -1  15 97.9889 35.5085   2
   2  -1  15 138.809 38.2369   1
   2  -1  15 153.421 58.8567   3
   2  -1  15 40.0807 30.2369   4
   2  -1  16 754.714 129.225   3
   2  -1  16 821.289 93.2622   2
   2  -1  16 601.061 76.2007   1
   2  -1  17 108.848 41.3163   1
   2  -1  17 44.5245 28.4047   3
   2  -1  18 148.050 65.7292   3
   2  -1  18 56.5538 30.8831   1
   2  -1  19 26.4159 41.4564   3
   2  -1  19 37.0019 25.3679   1
   2  -1  20 21.6996 30.3055   1
   2  -1  20 27.1595 24.5438   3
   2  -1  21 60.1131 33.1819   1
  -2   0  24-27.3116 32.2050   1
  -2   0  23-9.71766 19.8825   1
  -2   0  22 1.72623 26.4541   1
   2   0 -22-50.3437 33.0588   2
   2   0 -21 129.004 46.6653   2
  -2   0  21 66.2807 37.8831   1
   2   0 -20-15.2124 20.8074   2
  -2   0  20 53.9872 34.0575   1
   2   0 -19 119.343 39.5750   2
   2   0 -18 41.2286 26.2151   2
  -2   0  17 144.870 30.8070   4
   2   0 -17 88.0205 40.2904   2
  -2   0  16 42.0130 15.5727   4
   2   0 -16 62.0380 29.3667   2
  -2   0  15 6.07354 9.35539   4
   2   0 -15-11.8438 22.7694   2
  -2   0  14 245.688 35.1138   4
   2   0 -14 204.102 45.5838   2
  -2   0  14 243.649 58.8871   2
  -2   0  13 549.815 49.2376   4
  -2   0  13 535.948 84.1127   2
   2   0 -13 554.866 73.3690   2
  -2   0  12 547.439 83.3308   2
   2   0 -12 437.630 64.8106   2
  -2   0  12 458.037 42.9776   4
   2   0 -11 359.373 54.8141   2
  -2   0  11 326.171 60.7827   2
   2   0 -10 1928.96 124.116   2
  -2   0  10 1930.92 142.581   2
   2   0  -9 515.135 60.5776   3
   2   0  -9 583.966 66.8615   2
  -2   0   9 529.508 72.3075   2
   2   0  -8 2154.81 112.331   3
   2   0  -8 2069.93 123.573   2
   2   0  -7 446.310 48.0441   3
   2   0  -7 553.523 60.4010   2
  -2   0   7 474.184 30.9732   4
  -2   0   6 39.1370 11.0274   4
   2   0  -6 20.8120 12.3452   3
   2   0  -6-7.96173 14.9388   2
   2   0  -5 756.799 47.8243   3
   2   0  -5 762.949 70.0178   2
  -2   0   5 792.733 41.2727   4
   2   0  -4 3541.18 143.188   2
   2   0  -4 3607.27 84.2561   4
  -2   0   4 3575.60 92.8469   4
   2   0  -3 6064.18 122.644   4
  -2   0   3 6124.57 128.400   4
   2   0  -3 6041.47 182.807   2
   2   0  -2 71209.2 606.417   2
   2   0  -2 69795.1 462.574   4
  -2   0   2 70632.7 466.975   4
  -2   0   1 1.93163 11.4178   4
   2   0  -1 18.5366 21.0623   2
   2   0  -1 29.5179 11.3451   4
   2   0   0 1045.70 64.4775   4
   2   0   0 966.326 65.3137   1
  -2   0   0 916.542 63.7392   1
  -2   0   0 943.869 62.4250   4
   2   0   1 57226.9 516.060   4
   2   0   1 57909.3 491.509   1
  -2   0  -1 57789.8 486.892   1
   2   0   2 4323.10 134.991   1
  -2   0  -2 4068.95 126.799   1
   2   0   2 4527.11 153.448   4
   2   0   3 4141.64 134.144   1
  -2   0  -3 4050.92 124.341   1
   2   0   3 4184.73 153.046   4
   2   0   4 403.442 51.0778   4
   2   0   4 324.046 52.1465   3
   2   0   4 299.150 39.5586   1
  -2   0  -4 291.432 33.0549   1
  -2   0  -5 74.7310 19.0341   1
   2   0   5 84.7922 21.7407   1
   2   0   5 127.193 34.4491   4
  -2   0  -6 3515.54 105.495   5
  -2   0  -6 3722.72 129.369   1
   2   0   6 3447.23 163.065   4
   2   0   6 3586.82 133.723   1
   2   0   7 3.80974 16.4385   4
  -2   0  -7 23.0500 12.6139   1
  -2   0  -7 19.9292 8.35030   5
   2   0   7-1.98645 14.0220   1
   2   0   8 183.690 41.2419   4
  -2   0  -8 154.775 29.6916   1
   2   0   8 199.376 32.0347   2
  -2   0  -8 172.905 20.5921   5
   2   0   8 201.780 38.0316   1
   2   0   9 50.1584 23.9818   4
   2   0   9 44.0849 17.5490   2
  -2   0  -9 60.6733 12.5461   5
  -2   0  -9 66.3223 21.6523   1
   2   0   9 63.3040 24.6210   1
   2   0  10 1004.55 78.1996   2
   2   0  10 919.935 79.6017   1
   2   0  10 1041.10 105.346   4
   2   0  11 613.287 64.8220   2
   2   0  11 670.948 85.8117   4
   2   0  11 570.494 65.6299   1
   2   0  11 594.976 115.927   3
   2   0  12 42.4970 35.4777   3
   2   0  12 45.8399 25.2074   4
   2   0  12 43.8146 16.9882   2
   2   0  12 56.7751 20.1859   1
   2   0  13 51.6479 30.9114   4
   2   0  13 28.0832 37.8958   3
   2   0  13 18.4850 19.3770   1
   2   0  13 15.1133 18.2186   2
   2   0  14 190.388 42.5922   1
   2   0  14 185.156 59.6618   3
   2   0  14 160.011 50.6021   4
   2   0  14 137.570 34.8081   2
   2   0  15 63.7996 30.8370   1
   2   0  15-15.5777 30.5495   3
   2   0  15 39.9516 22.4193   2
   2   0  16 161.346 45.1716   1
   2   0  16 164.245 64.8701   3
   2   0  17 106.857 38.2198   1
   2   0  17 55.8387 52.8827   3
   2   0  18-0.58281 21.0028   1
   2   0  18-11.5766 37.7799   3
   2   0  19 27.3049 24.0001   1
   2   0  20 7.92290 25.1766   1
   2   0  21 0.90139 28.3430   1
  -2  -1  24 7.90132 28.9881   1
  -2  -1  23-10.5663 23.7010   1
   2   1 -23 10.9259 20.0807   2
   2   1 -22-23.8186 24.7843   2
  -2  -1  22 5.64871 24.7741   1
   2   1 -21 45.7018 35.2494   2
  -2  -1  21-45.6006 19.4783   1
  -2  -1  20 110.138 44.4155   1
   2   1 -20 112.224 37.9120   2
   2   1 -19 49.3111 26.4143   2
   2   1 -18 16.3325 19.4651   2
   2   1 -17 220.845 50.7058   2
  -2  -1  17 246.664 36.1546   4
   2   1 -16 156.005 39.1873   2
  -2  -1  16 153.908 27.2674   4
  -2  -1  15 482.628 45.4898   4
   2   1 -15 498.718 70.9975   2
  -2  -1  14 591.895 46.9293   4
   2   1 -14 618.206 78.2033   2
  -2  -1  14 667.483 96.6613   2
   2   1 -13 789.705 85.5782   2
  -2  -1  13 948.160 56.4219   4
  -2  -1  13 881.346 107.153   2
  -2  -1  12 52.1907 12.9560   4
   2   1 -12 60.3368 25.6437   2
  -2  -1  12 43.6411 27.3070   2
  -2  -1  11 1016.81 48.5266   4
   2   1 -11 1014.61 94.2581   2
  -2  -1  11 1072.38 109.427   2
  -2  -1  10 144.669 16.2000   4
   2   1 -10 145.183 34.3062   2
  -2  -1  10 165.128 41.3785   2
   2   1  -9 619.487 69.8182   2
  -2  -1   9 765.606 85.5680   2
  -2  -1   8 831.865 82.6063   2
   2   1  -8 793.905 78.8323   2
   2   1  -7 191.981 38.8663   2
  -2  -1   6 65.0661 21.5177   2
  -2  -1   6 76.1512 9.80410   4
   2   1  -6 69.6329 26.5031   2
   2   1  -5 4200.30 162.368   2
   2   1  -5 3894.14 72.2878   4
  -2  -1   5 3978.01 164.706   2
  -2  -1   5 3942.33 78.5726   4
   2   1  -4 663.264 64.0673   2
   2   1  -4 723.746 38.5055   4
  -2  -1   4 700.724 37.0015   4
   2   1  -3 83858.7 692.085   2
   2   1  -3 80829.6 462.312   4
  -2  -1   3 81752.2 457.090   4
   2   1  -2 4688.83 122.120   4
  -2  -1   2 4801.42 120.335   4
   2   1  -2 4705.39 162.982   2
   2   1  -1 122.917 21.5731   4
  -2  -1   1 138.178 25.5471   4
   2   1  -1 149.660 21.1362   3
   2   1  -1 132.543 22.8771   1
   2   1   0 68562.1 468.234   3
  -2  -1   0 68581.6 528.370   4
   2   1   0 68416.8 552.956   1
  -2  -1   0 66801.0 547.388   1
   2   1   0 68042.8 537.071   4
   2   1   1 8463.04 190.972   3
   2   1   1 8797.87 202.503   1
  -2  -1  -1 8183.35 188.275   1
   2   1   1 8376.95 199.875   4
   2   1   2 1502.53 89.5095   3
   2   1   2 1488.68 84.6974   1
  -2  -1  -2 1494.28 78.2592   1
   2   1   2 1558.10 90.2086   4
   2   1   3 4352.87 144.664   1
   2   1   3 4422.21 162.176   4
  -2  -1  -3 4276.31 133.101   1
   2   1   3 4472.39 172.415   3
   2   1   4 1532.16 107.784   3
   2   1   4 1655.95 91.6772   1
   2   1   4 1623.57 101.993   4
  -2  -1  -4 1597.01 83.5605   1
   2   1   5 108.027 31.9824   4
   2   1   5 72.9177 17.3318   1
  -2  -1  -5 85.1171 19.2412   1
  -2  -1  -6 4264.42 146.126   1
   2   1   6 4289.22 155.439   1
   2   1   6 4153.88 181.148   4
  -2  -1  -7 1604.40 58.7683   5
  -2  -1  -7 1652.23 92.4770   1
   2   1   7 1676.84 99.3328   1
   2   1   7 1593.83 117.352   4
  -2  -1  -8 936.726 41.8817   5
   2   1   8 977.736 78.9724   1
   2   1   8 918.245 72.1454   2
   2   1   8 880.127 92.0151   4
   2   1   9 3846.27 153.612   2
   2   1   9 3636.47 191.960   4
   2   1   9 3509.89 155.945   1
   2   1  10 11.6538 18.4535   4
   2   1  10-6.20679 12.3441   1
   2   1  10-3.12219 24.4086   3
   2   1  10-16.5856 12.7836   2
   2   1  11 27.9026 22.0692   4
   2   1  11-6.64232 17.3921   1
   2   1  11 20.2256 22.2265   3
   2   1  11 2.41762 12.4465   2
   2   1  12 21.4854 15.2922   4
   2   1  12 4.92384 24.4071   3
   2   1  12 17.8007 19.2122   1
   2   1  12 3.60983 11.7080   2
   2   1  13 500.368 82.2228   4
   2   1  13 461.457 69.5673   1
   2   1  13 540.160 102.560   3
   2   1  13 580.468 73.5245   2
   2   1  14 244.438 52.6292   1
   2   1  14 249.406 71.0855   3
   2   1  14 265.667 53.6143   2
   2   1  15 98.4816 34.5553   1
   2   1  15 96.6218 52.9400   3
   2   1  16 20.6110 22.7392   1
   2   1  16-0.82964 35.9942   3
   2   1  17 79.8252 35.9767   1
   2   1  18-4.12177 20.0149   1
   2   1  19 41.9255 35.7717   1
   2   1  20 11.6969 22.1617   1
   2   1  21-16.3900 19.7669   1
  -2  -2  24 21.4992 29.3688   1
   2   2 -23 42.2564 36.1068   2
  -2  -2  23-89.2089 40.2930   1
   2   2 -22 148.151 49.5394   2
  -2  -2  22 52.8158 37.8648   1
   2   2 -21-35.3393 24.9181   2
  -2  -2  21 23.6272 35.8364   1
   2   2 -20 81.5562 34.8738   2
  -2  -2  20 77.4085 26.0580   5
   2   2 -19 22.9852 17.0639   2
   2   2 -18 224.118 52.0602   2
  -2  -2  17 18.4962 11.0926   4
   2   2 -17 12.4929 23.3698   2
   2   2 -16 14.6701 14.8882   2
  -2  -2  16-2.91248 8.31709   4
   2   2 -15 191.911 45.6114   2
  -2  -2  15 229.154 24.5859   4
  -2  -2  15 321.052 70.3024   2
  -2  -2  14 736.825 100.590   2
   2   2 -14 627.701 77.7082   2
  -2  -2  14 592.975 37.2155   4
  -2  -2  13 112.369 14.6647   4
  -2  -2  13 63.3694 25.2856   3
   2   2 -13 84.5533 26.0911   2
  -2  -2  13 120.403 42.6597   2
  -2  -2  12 305.636 57.4097   3
   2   2 -12 215.213 41.7093   2
  -2  -2  12 237.330 54.0485   2
  -2  -2  11 16.6426 15.3454   2
  -2  -2  11 22.8569 16.8609   3
   2   2 -11 12.5333 18.9333   2
  -2  -2  10 1794.01 107.355   3
  -2  -2  10 1790.43 131.997   2
   2   2 -10 1839.84 121.000   2
  -2  -2   9 6.68074 17.7905   2
  -2  -2   9 9.44468 13.3053   3
   2   2  -9 56.0231 25.9048   2
  -2  -2   8 427.300 62.0164   2
   2   2  -8 486.545 59.6740   2
  -2  -2   8 448.995 43.7909   3
  -2  -2   7 435.815 56.5579   2
  -2  -2   7 515.759 40.4377   3
   2   2  -7 580.511 65.3206   2
  -2  -2   6 974.918 46.2902   3
   2   2  -6 1013.86 84.1249   2
  -2  -2   6 908.021 83.4813   2
  -2  -2   5 397.523 52.4722   2
   2   2  -5 315.265 47.4346   2
   2   2  -5 353.789 23.2787   4
   2   2  -4 14046.4 297.955   2
  -2  -2   4 14098.0 281.147   1
   2   2  -4 13753.7 175.214   4
   2   2  -3 666.403 66.8541   2
   2   2  -3 682.852 44.1403   4
  -2  -2   2 6487.63 108.125   3
   2   2  -2 6599.40 149.979   4
   2   2  -2 6533.27 181.767   1
  -2  -2   1 53476.6 390.199   3
   2   2  -1 53634.1 517.014   1
   2   2  -1 53699.4 457.734   4
  -2  -2   0 1794.63 84.9963   3
   2   2   0 2026.32 87.0691   3
   2   2   0 1895.40 98.6340   1
   2   2   0 1785.47 89.7752   4
  -2  -2  -1 3019.10 122.467   3
   2   2   1 3029.10 120.254   3
   2   2   1 3230.33 126.330   4
   2   2   1 3168.43 126.519   1
  -2  -2  -1 2959.44 116.047   1
  -2  -2  -2 765.003 71.0251   3
   2   2   2 825.481 70.6698   3
  -2  -2  -2 798.100 61.2525   1
   2   2   2 766.396 64.6795   4
   2   2   2 667.826 59.2649   1
   2   2   3 160.187 32.9569   4
  -2  -2  -3 143.088 26.4499   1
  -2  -2  -3 163.323 37.2033   3
   2   2   3 135.015 33.1317   3
   2   2   3 139.597 29.0906   1
  -2  -2  -4 160.692 29.8918   1
   2   2   4 161.833 32.2004   1
   2   2   4 136.739 32.4291   4
  -2  -2  -5 801.483 65.1000   1
   2   2   5 841.413 70.8346   1
   2   2   5 869.745 82.2290   4
   2   2   6 6.26961 12.7075   4
  -2  -2  -6-10.2196 11.2573   1
   2   2   6-5.56263 13.5464   1
   2   2   7 2167.60 121.160   1
  -2  -2  -7 2088.79 56.8863   5
   2   2   7 2139.09 138.900   4
   2   2   8 24.3487 22.6044   1
   2   2   8 45.4153 24.5434   4
  -2  -2  -8 24.7138 6.41975   5
   2   2   8 31.9815 18.8993   2
   2   2   9 30.2190 17.1723   1
   2   2   9 21.9342 15.4101   4
  -2  -2  -9 39.7087 18.0208   1
   2   2   9 55.5718 21.6748   2
   2   2  10 98.2274 42.4214   4
   2   2  10 8.67045 19.6363   1
   2   2  10 39.0995 27.6817   3
   2   2  10 14.0512 15.4422   2
   2   2  11 29.7183 18.9935   2
   2   2  11-7.63350 19.9973   4
   2   2  11 11.8391 16.6035   1
   2   2  11 19.6801 35.1788   3
   2   2  12 340.183 58.2549   1
   2   2  12 323.014 66.2477   4
   2   2  12 323.044 81.3004   3
   2   2  12 347.041 57.8670   2
   2   2  13 39.6247 23.8821   1
   2   2  13 26.0179 19.8795   2
   2   2  13-21.4055 35.1336   3
   2   2  14-1.16549 19.0528   1
   2   2  15 138.123 40.6262   1
   2   2  16-12.1195 16.5645   1
   2   2  17 19.5076 23.7653   1
   2   2  18 7.22206 21.6344   1
   2   2  19 54.6240 32.0340   1
   2   2  20 23.3146 28.6430   1
   2   2  21 71.3923 43.5823   1
   2   3 -24-3.09553 18.5024   2
  -2  -3  24 73.7442 41.8487   1
  -2  -3  23-35.9559 28.1727   1
   2   3 -23 43.9777 30.9489   2
  -2  -3  22 60.0315 33.6166   1
   2   3 -22-16.7592 21.2423   2
   2   3 -21 18.4515 28.3900   2
  -2  -3  21-3.29395 14.5041   5
   2   3 -20 81.1727 33.6575   2
  -2  -3  20 57.7175 23.5941   5
   2   3 -19 7.50996 17.8742   2
   2   3 -18 17.9302 22.3634   2
  -2  -3  18-1.59560 3.93831   4
   2   3 -17 79.9115 28.5065   2
  -2  -3  17 37.3171 8.01819   4
  -2  -3  16 243.843 62.3272   2
  -2  -3  16 262.319 59.9549   3
   2   3 -16 195.167 44.3324   2
  -2  -3  15 144.184 48.9629   2
  -2  -3  15 77.4776 30.7538   3
   2   3 -15 116.150 36.1212   2
  -2  -3  14 123.979 44.4433   2
  -2  -3  14 90.7340 32.3460   3
   2   3 -14 120.767 34.8007   2
  -2  -3  13 2970.20 165.596   3
   2   3 -13 3013.95 163.514   2
  -2  -3  13 2896.15 186.941   2
  -2  -3  12 4.29983 17.7610   2
  -2  -3  12 19.9808 19.5037   3
   2   3 -12 76.7256 28.1658   2
  -2  -3  11 4.39390 20.6667   2
  -2  -3  11-0.75613 12.0505   3
   2   3 -11 9.10892 16.7648   2
   2   3 -10 3547.57 169.814   2
  -2  -3  10 3219.67 137.827   3
  -2  -3  10 3103.90 175.181   2
  -2  -3   9 462.133 65.4650   2
  -2  -3   9 529.212 51.6021   3
   2   3  -9 515.772 63.9463   2
  -2  -3   8 196.203 41.4087   2
   2   3  -8 294.720 47.2724   2
  -2  -3   8 267.876 32.9563   3
   2   3  -7 3351.47 156.022   2
  -2  -3   7 3472.27 99.7314   3
  -2  -3   7 3082.22 158.366   2
   2   3  -6 463.539 56.0855   2
  -2  -3   6 432.477 59.0766   2
   2   3  -6 475.022 25.3846   4
   2   3  -5 265.051 46.1574   2
  -2  -3   5 227.049 38.1056   1
   2   3  -5 220.173 22.0822   4
  -2  -3   4 6178.56 186.085   1
   2   3  -4 6481.83 207.084   2
   2   3  -4 6017.04 126.171   4
   2   3  -3 33736.1 432.618   1
  -2  -3   3 33808.7 421.749   1
  -2  -3   2 2371.81 81.3085   3
   2   3  -2 2463.77 117.209   1
   2   3  -1 8202.55 210.008   1
  -2  -3   1 8216.32 175.610   3
  -2  -3   0 777.592 63.1717   3
   2   3   0 701.258 63.2708   1
  -2  -3  -1 406.061 49.4151   3
   2   3   1 349.934 45.0319   1
  -2  -3  -2 85.6939 28.2237   3
  -2  -3  -2 38.3440 14.2326   1
   2   3   2 117.027 32.3826   1
   2   3   3 366.363 47.0676   1
   2   3   3 348.733 52.7225   3
  -2  -3  -3 374.188 55.0939   3
   2   3   4 2521.04 137.904   4
  -2  -3  -4 2587.40 155.699   3
   2   3   4 2506.71 125.425   1
  -2  -3  -4 2669.52 121.331   1
   2   3   5-0.88511 15.2305   4
  -2  -3  -5-9.53800 10.2742   1
  -2  -3  -5-14.6278 25.3035   3
   2   3   5 36.8352 27.4806   1
   2   3   6 229.266 45.9962   4
  -2  -3  -6 266.466 53.6731   3
   2   3   6 289.324 47.2421   1
  -2  -3  -7 3953.92 226.188   3
   2   3   7 3807.54 169.126   1
   2   3   7 3968.86 195.961   4
  -2  -3  -8 1307.43 98.0321   1
   2   3   8 1357.68 99.1351   2
   2   3   8 1154.32 110.252   4
   2   3   8 1259.73 97.8154   1
   2   3   9 1803.44 142.705   4
   2   3   9 1730.13 120.893   1
   2   3   9 1724.52 116.259   2
  -2  -3  -9 1875.65 121.742   1
   2   3  10 143.098 43.1340   4
   2   3  10 105.113 31.4409   1
   2   3  10 67.9165 25.8634   2
   2   3  11 74.4090 29.7539   4
   2   3  11 120.162 35.9911   2
   2   3  11 76.4348 30.9310   1
   2   3  12 825.703 94.1818   1
   2   3  13 722.646 90.5268   1
   2   3  14-31.7671 30.2008   1
   2   3  15 49.6057 29.8728   1
   2   3  16 180.656 52.2047   1
   2   3  17 2.97080 19.9871   1
   2   3  18 71.9053 40.0807   1
   2   3  19 20.4356 22.4950   1
   2   3  20 4.69644 23.9982   1
   2   3  21 20.7247 29.0150   1
   2   4 -25-10.3517 20.3980   2
   2   4 -24 200.937 57.6060   2
  -2  -4  24 61.3921 40.5136   1
   2   4 -23 38.6795 30.4920   2
  -2  -4  23 47.7932 29.8035   1
   2   4 -22 34.7149 30.4313   2
  -2  -4  21 29.7403 21.3010   5
   2   4 -21 61.3879 31.6272   2
   2   4 -20 5.86275 17.3328   2
  -2  -4  20 13.9304 15.5923   5
   2   4 -19 235.785 51.2182   2
  -2  -4  19 200.358 59.1634   3
   2   4 -18 142.488 42.8288   2
  -2  -4  18 152.331 48.8647   3
  -2  -4  17 109.760 45.7670   2
  -2  -4  17 74.7179 39.0129   3
   2   4 -17 113.363 37.0620   2
  -2  -4  16 179.189 47.5998   3
   2   4 -16 255.176 50.6049   2
  -2  -4  16 375.708 75.8842   2
  -2  -4  15 706.729 97.7750   2
  -2  -4  15 665.492 88.0903   3
   2   4 -15 707.969 81.3560   2
  -2  -4  14 562.595 84.9350   2
  -2  -4  14 626.116 78.8208   3
   2   4 -14 752.725 84.3886   2
  -2  -4  13 80.1163 33.7492   2
  -2  -4  13 121.433 31.3133   3
   2   4 -13 142.935 33.9160   2
  -2  -4  12 1267.63 98.5090   3
   2   4 -12 1299.54 106.842   2
  -2  -4  12 1366.91 122.867   2
  -2  -4  11 57.4337 27.3520   2
  -2  -4  11 56.0843 23.8978   3
   2   4 -11 30.0700 18.8996   2
  -2  -4  10 3680.71 143.586   3
   2   4 -10 3633.64 173.485   2
  -2  -4  10 3649.60 189.969   2
  -2  -4   9 2040.47 138.568   2
   2   4  -9 2308.23 135.520   2
  -2  -4   8 174.019 43.4036   2
   2   4  -8 148.086 36.5788   2
   2   4  -7 525.039 63.9099   2
  -2  -4   7 436.728 56.6504   1
  -2  -4   6 897.744 75.9353   1
   2   4  -6 1041.83 89.0162   2
   2   4  -5 16.8611 18.4681   2
  -2  -4   5-1.13606 13.5843   1
   2   4  -4 920.438 75.4077   1
  -2  -4   4 881.127 71.5826   1
  -2  -4   3 92.6326 24.4604   1
   2   4  -3 94.1835 28.4870   1
   2   4  -2 4002.48 152.002   1
  -2  -4   2 3820.68 143.658   1
  -2  -4   1 2151.84 99.4480   3
   2   4  -1 2210.42 113.556   1
  -2  -4   0 863.857 70.1946   3
   2   4   0 787.892 69.4457   1
  -2  -4  -1 545.606 61.0366   3
   2   4   1 558.523 61.2247   1
  -2  -4  -2-35.7166 23.8738   3
   2   4   2-29.9902 22.1038   1
  -2  -4  -3 5190.57 216.976   3
   2   4   3 5313.23 185.524   1
   2   4   4 231.073 45.0888   1
  -2  -4  -4 208.584 49.1845   3
  -2  -4  -5 251.075 53.8458   3
   2   4   5 193.572 40.0558   1
  -2  -4  -6 26.4376 19.8353   3
   2   4   6 66.2943 31.2049   1
  -2  -4  -6 72.6177 26.1807   1
  -2  -4  -7 776.123 101.262   3
  -2  -4  -7 796.849 77.1829   1
   2   4   7 738.579 88.0357   4
   2   4   7 648.912 73.3433   1
   2   4   8 50.5146 27.1432   4
  -2  -4  -8 79.7779 41.5043   3
  -2  -4  -8 20.2913 11.9546   1
   2   4   8 26.4804 25.1635   1
   2   4   8 22.2202 10.9329   2
   2   4   9 1244.95 103.281   2
   2   4   9 1282.76 124.121   4
   2   4   9 1033.41 98.7173   1
   2   4  10 0.58908 19.8064   1
   2   4  10-18.3717 25.9424   4
   2   4  10 8.03696 16.6921   2
   2   4  11 507.459 74.1082   1
   2   4  12 28.9490 23.1773   1
   2   4  13 20.2775 19.6464   1
   2   4  14 86.5403 34.4901   1
   2   4  15 38.1749 29.0241   1
   2   4  16-1.95194 26.6825   1
   2   4  17-10.1962 23.1239   1
   2   4  18-38.0128 31.8460   1
   2   4  19 36.9416 32.3920   1
   2   4  20 75.1492 44.7037   1
   2   5 -25-57.1442 32.0961   2
  -2  -5  24-22.5798 27.7339   1
   2   5 -24-20.3944 22.1436   2
   2   5 -23 42.7677 29.5854   2
  -2  -5  23 56.3308 26.1164   1
  -2  -5  22-20.9624 21.1424   5
   2   5 -22-15.7800 18.0208   2
   2   5 -21 107.043 38.8677   2
  -2  -5  21 119.133 48.4180   3
  -2  -5  21 103.827 36.0809   5
   2   5 -20-9.10571 19.6029   2
  -2  -5  20 27.7888 28.2721   3
  -2  -5  20 9.56425 15.7027   5
   2   5 -19 128.679 41.7052   2
  -2  -5  19 23.1781 23.1497   3
  -2  -5  18 393.772 72.1573   3
   2   5 -18 490.224 71.7765   2
  -2  -5  17 597.814 94.8718   2
  -2  -5  17 786.352 99.3515   3
   2   5 -17 612.870 80.8007   2
  -2  -5  16 712.783 100.605   2
  -2  -5  16 699.685 90.9831   3
   2   5 -16 757.981 87.2392   2
  -2  -5  15 133.884 37.5997   2
  -2  -5  15 241.588 52.6402   3
   2   5 -15 187.117 45.6145   2
  -2  -5  14 862.121 90.1206   3
   2   5 -14 793.475 85.9725   2
  -2  -5  14 940.801 108.039   2
  -2  -5  13 375.436 66.4973   2
  -2  -5  13 381.584 54.6211   3
   2   5 -13 438.725 64.6644   2
  -2  -5  12 601.732 66.3518   3
  -2  -5  12 550.220 80.4320   2
   2   5 -12 686.598 80.0312   2
   2   5 -11 179.093 42.3329   2
  -2  -5  11 106.213 36.1814   2
   2   5 -10 139.860 37.3034   2
  -2  -5  10 126.108 41.2421   2
  -2  -5   9 1278.53 108.607   2
   2   5  -9 1406.49 107.428   2
  -2  -5   8 1102.08 90.1836   1
   2   5  -8 1223.80 100.363   2
  -2  -5   7 4604.63 172.903   1
   2   5  -7 4924.26 200.628   2
  -2  -5   6 2834.11 135.095   1
   2   5  -6 2751.54 148.359   2
   2   5  -5 2295.45 121.203   1
  -2  -5   5 2404.57 121.583   1
   2   5  -4 2100.39 113.593   1
  -2  -5   4 1925.48 106.530   1
   2   5  -3 1345.11 93.3620   1
  -2  -5   3 1368.97 88.9525   1
  -2  -5   2 45.9994 19.1334   1
   2   5  -2 59.8629 27.7052   1
   2   5  -1 1736.84 104.050   1
  -2  -5   0 5344.78 191.061   3
   2   5   0 5495.10 186.999   1
  -2  -5  -1 805.738 80.4121   3
   2   5   1 951.837 79.5918   1
  -2  -5  -2 3140.11 165.960   3
   2   5   2 3281.57 150.440   1
   2   5   3 417.169 57.9389   1
  -2  -5  -3 472.372 68.7822   3
   2   5   4 3293.39 159.074   1
  -2  -5  -4 3366.23 193.862   3
   2   5   5 3.75329 17.2992   1
  -2  -5  -5 27.5617 23.5100   3
  -2  -5  -6 1878.59 159.294   3
  -2  -5  -6 1678.84 112.986   1
   2   5   6 1774.92 121.993   1
   2   5   7 248.246 49.2072   1
  -2  -5  -7 230.221 59.9880   3
   2   5   7 304.290 52.0618   2
  -2  -5  -7 404.072 59.3604   1
   2   5   8 124.830 38.1504   1
  -2  -5  -8 148.237 57.5234   3
  -2  -5  -8 170.469 39.7315   1
   2   5   8 226.865 46.7499   2
   2   5   9 339.855 68.6272   4
   2   5   9 360.127 63.4922   1
   2   5   9 334.521 56.8812   2
   2   5  10 62.1007 30.1311   1
   2   5  11 315.568 64.7660   1
   2   5  12-38.1131 37.9504   1
   2   5  13 110.007 36.9029   1
   2   5  14 0.50413 21.9453   1
   2   5  15-22.8947 24.7573   1
   2   5  16-21.2772 28.4986   1
   2   5  17 33.2330 29.6498   1
   2   5  18 47.0918 39.7878   1
   2   5  19 104.579 55.0191   1
   2   6 -25 16.7171 22.4037   2
   2   6 -24-30.9324 24.2470   2
  -2  -6  23 29.2210 16.9290   5
  -2  -6  23 35.4978 34.7954   3
   2   6 -23-21.6750 21.1091   2
   2   6 -22 67.0164 30.7587   2
  -2  -6  22 55.0446 27.4180   5
  -2  -6  22 42.7306 64.4256   3
  -2  -6  21 22.9319 20.7477   5
   2   6 -21 47.4140 27.3730   2
  -2  -6  21 63.6687 29.9432   3
   2   6 -20 573.940 80.2820   2
  -2  -6  20 591.996 96.3158   3
  -2  -6  20 666.673 79.4348   5
  -2  -6  19 220.669 57.6035   3
   2   6 -19 152.271 44.3371   2
  -2  -6  18-11.1134 31.8612   2
   2   6 -18 50.7675 24.9152   2
  -2  -6  18-0.82111 22.5065   3
   2   6 -17 52.8721 28.2865   2
  -2  -6  17 45.9033 21.9517   3
  -2  -6  17 143.994 51.6021   2
   2   6 -16 65.3935 25.5861   2
  -2  -6  16 27.3314 24.5817   2
  -2  -6  16 72.5535 33.2837   3
  -2  -6  15 292.506 63.0291   2
  -2  -6  15 279.879 52.9621   3
   2   6 -15 215.892 46.0822   2
  -2  -6  14 210.782 42.4411   3
  -2  -6  14 205.445 53.7241   2
   2   6 -14 238.717 46.3694   2
  -2  -6  13 875.869 100.758   2
   2   6 -13 867.870 89.7672   2
  -2  -6  12 101.828 36.1325   2
   2   6 -12 79.0991 32.1298   2
  -2  -6  11-31.8537 24.4593   2
   2   6 -11-6.44499 18.8983   2
  -2  -6  11 13.6842 15.0984   1
   2   6 -10-18.6569 16.2543   2
  -2  -6  10 5.57661 13.6895   1
   2   6 -10-4.56559 6.00588   4
   2   6  -9 60.0776 27.9753   2
  -2  -6   9 59.1881 22.6709   1
  -2  -6   8 571.764 62.0822   1
   2   6  -8 655.458 75.6994   2
  -2  -6   7 4205.02 167.778   1
   2   6  -7 4395.12 194.641   2
   2   6  -6 1723.26 110.424   1
  -2  -6   6 1664.27 104.714   1
   2   6  -5 1147.88 89.4427   1
  -2  -6   5 1126.71 83.8833   1
   2   6  -4 688.052 67.9300   1
  -2  -6   4 615.774 62.4615   1
   2   6  -3 835.719 77.3036   1
  -2  -6   3 822.424 69.8473   1
   2   6  -2 199.452 38.3874   1
   2   6  -1 475.716 59.7842   1
   2   6   0 693.754 69.5899   1
  -2  -6  -1 151.095 39.1446   3
   2   6   1 199.761 41.9518   1
  -2  -6  -2 225.440 48.2852   3
   2   6   2 231.740 46.1050   1
  -2  -6  -3 644.956 83.4185   3
   2   6   3 590.332 71.0902   1
  -2  -6  -4 65.7996 33.0638   3
   2   6   4 41.2896 23.7544   1
  -2  -6  -5 822.635 104.446   3
  -2  -6  -5 801.188 35.8077   5
   2   6   5 718.871 80.0643   1
   2   6   6 21.1438 21.0166   1
  -2  -6  -6 34.6267 20.6083   3
  -2  -6  -6 29.3191 18.2539   1
   2   6   7 137.953 38.1564   1
  -2  -6  -7 178.690 53.5690   3
  -2  -6  -7 221.686 44.4052   1
   2   6   7 200.233 42.4953   2
   2   6   8 355.477 61.1289   1
   2   6   9 98.7035 33.0042   1
   2   6  10 1683.12 140.810   1
   2   6  11 37.2525 18.5728   1
   2   6  12 82.8958 37.9462   1
   2   6  13 66.6870 35.0888   1
   2   6  14 4.58136 21.2202   1
   2   6  15 47.1182 35.1111   1
   2   6  16 26.6519 23.6644   1
   2   6  17 60.6549 38.8793   1
   2   6  18 16.2660 32.1718   1
  -2  -7  24-35.0875 34.4151   3
   2   7 -24 34.2529 27.5283   2
  -2  -7  23-12.0939 25.5565   3
  -2  -7  23-4.97752 14.2910   5
   2   7 -23 8.39557 13.1547   2
  -2  -7  22 82.3647 31.3670   5
  -2  -7  22 112.250 47.4589   3
   2   7 -22 55.9707 30.6438   2
   2   7 -21 144.619 40.9385   2
  -2  -7  21 158.356 54.7774   3
  -2  -7  21 112.444 36.1575   5
  -2  -7  20 15.1796 26.4511   3
  -2  -7  20 14.4611 18.3689   5
   2   7 -20 51.7295 30.8461   2
   2   7 -19 142.702 39.7707   2
  -2  -7  19 112.282 44.4399   2
  -2  -7  19 117.338 42.9530   3
  -2  -7  18 43.5589 35.3395   2
  -2  -7  18 15.7001 24.7889   3
   2   7 -18 22.5877 19.0804   2
  -2  -7  17 768.195 97.7529   3
  -2  -7  17 791.976 107.084   2
   2   7 -17 659.772 79.6045   2
  -2  -7  16 35.6015 20.6937   2
   2   7 -16 82.0052 32.6539   2
  -2  -7  16 27.2406 17.9637   3
  -2  -7  15 164.819 46.8317   2
   2   7 -15 132.814 38.9862   2
  -2  -7  14 9.48224 15.3209   2
   2   7 -14 18.8674 17.5447   2
  -2  -7  13 277.385 53.8096   1
   2   7 -13 250.435 50.3300   2
  -2  -7  12 1320.61 104.761   1
   2   7 -12 1235.81 108.261   2
   2   7 -12 1161.88 48.6165   4
   2   7 -11-2.69905 21.0762   2
  -2  -7  11 24.5982 21.3262   1
   2   7 -11-2.72485 7.38903   4
  -2  -7  10 1153.83 95.0000   1
   2   7 -10 1245.62 106.195   2
   2   7 -10 1275.49 58.9526   4
   2   7  -9 34.9173 19.7318   2
  -2  -7   9 19.7366 17.7538   1
  -2  -7   8 1257.50 94.8266   1
   2   7  -8 1478.62 115.124   2
   2   7  -7 1352.07 100.651   1
  -2  -7   7 1186.17 90.7187   1
   2   7  -6 981.916 85.3588   1
  -2  -7   6 1035.97 81.3233   1
   2   7  -5 6634.35 216.948   1
  -2  -7   5 6814.65 207.390   1
  -2  -7   4 170.174 33.4184   1
   2   7  -4 209.747 43.4984   1
   2   7  -3 448.378 58.5542   1
  -2  -7   3 421.078 51.5032   1
   2   7  -2 387.530 55.2900   1
   2   7  -1 1580.76 109.833   1
   2   7   0-9.17428 22.1605   1
   2   7   1 943.512 87.1850   1
   2   7   2 885.935 86.1796   1
  -2  -7  -2 928.100 101.366   3
  -2  -7  -3 305.200 64.2105   3
   2   7   3 392.991 59.3183   1
  -2  -7  -4 424.396 76.5881   3
  -2  -7  -4 497.627 34.5246   5
   2   7   4 432.700 65.2486   1
  -2  -7  -5 760.166 105.086   3
  -2  -7  -5 670.689 35.9314   5
  -2  -7  -5 742.289 80.8205   1
   2   7   5 690.625 81.9460   1
  -2  -7  -6-13.2185 18.9145   3
  -2  -7  -6 36.7119 24.4181   1
   2   7   6 26.2290 25.7951   1
   2   7   7 2115.97 149.659   1
   2   7   8 226.195 55.5867   1
   2   7   9 687.541 94.2803   1
   2   7  10-25.5753 27.9242   1
   2   7  11 249.640 60.9931   1
   2   7  12-23.3288 30.2141   1
   2   7  13 4.47397 22.2961   1
   2   7  14 178.899 58.7039   1
   2   7  15 2.11461 20.9887   1
   2   7  16 68.0989 37.9762   1
   2   7  17-50.2141 42.5948   1
  -2  -8  25 6.40046 34.4535   3
  -2  -8  24 107.963 51.6190   3
   2   8 -24 78.4609 31.0514   2
  -2  -8  24 84.9910 39.2725   5
   2   8 -23 1.67327 19.5428   2
  -2  -8  23-30.8183 23.2152   5
  -2  -8  23 8.37994 27.2443   3
  -2  -8  22 54.2330 27.7197   5
  -2  -8  22 23.0211 31.8115   3
   2   8 -22 33.4066 20.9817   2
  -2  -8  21 7.89522 19.4311   3
  -2  -8  21 9.56628 17.6822   5
   2   8 -21 0.65764 16.1036   2
  -2  -8  20-19.0021 27.0885   3
  -2  -8  20 15.7779 20.8877   5
   2   8 -20 4.48280 21.9698   2
  -2  -8  19 7.12650 18.5425   5
  -2  -8  19-5.58431 20.3575   3
  -2  -8  19 20.4371 28.8908   2
   2   8 -19-2.60593 16.4690   2
  -2  -8  18 580.175 88.2513   3
   2   8 -18 485.095 70.3226   2
  -2  -8  18 499.737 87.3821   2
  -2  -8  17 1450.14 133.463   3
   2   8 -17 1304.32 116.377   2
  -2  -8  17 1145.31 125.952   2
   2   8 -16 449.645 69.2683   2
  -2  -8  16 354.910 62.4820   1
  -2  -8  15-21.5296 26.5326   1
   2   8 -15-19.8228 22.1960   2
   2   8 -14 49.3020 11.5147   4
  -2  -8  14 58.1684 25.9597   1
   2   8 -14 82.6719 35.0190   2
  -2  -8  13 1350.69 109.655   1
   2   8 -13 1412.08 63.2930   4
   2   8 -13 1496.96 123.047   2
   2   8 -12-1.30487 24.4340   2
  -2  -8  12 12.5920 13.2977   1
   2   8 -12 1.14149 9.04765   4
  -2  -8  11 1273.86 99.8253   1
   2   8 -11 1396.01 117.931   2
   2   8 -11 1390.83 70.2842   4
   2   8 -10 97.1518 35.7246   2
  -2  -8  10 105.197 31.2905   1
  -2  -8   9 2743.05 143.763   1
   2   8  -9 2749.57 164.065   2
   2   8  -8 4413.84 187.629   1
  -2  -8   8 4588.68 179.864   1
  -2  -8   7 58.8489 24.3630   1
   2   8  -7 60.9833 25.0453   1
   2   8  -6 2424.94 135.607   1
  -2  -8   6 2270.61 123.678   1
  -2  -8   5 465.363 55.5164   1
   2   8  -5 477.906 61.3059   1
   2   8  -4 23.4336 26.2476   1
  -2  -8   4 14.3698 11.6519   1
   2   8  -3 3001.39 153.285   1
  -2  -8   3 2760.39 134.480   1
   2   8  -2 810.465 79.0848   1
  -2  -8   2 770.411 72.2838   1
   2   8  -1 103.931 36.5099   1
   2   8   0 8.62079 23.7065   1
   2   8   1 468.523 65.4331   1
  -2  -8  -2 3.92986 10.0120   5
  -2  -8  -2 0.44406 20.1964   3
   2   8   2-6.82126 24.2585   1
  -2  -8  -3 0.32261 20.6813   3
  -2  -8  -3 13.6634 8.10739   5
   2   8   3-6.32863 20.4525   1
  -2  -8  -4-0.20895 5.78036   5
  -2  -8  -4 9.46457 16.6819   3
   2   8   4 33.1562 24.7677   1
  -2  -8  -4-7.71266 18.4145   1
   2   8   5 324.950 58.5070   1
  -2  -8  -5 436.007 83.5579   3
  -2  -8  -5 309.135 54.4177   1
  -2  -8  -5 326.832 27.6642   5
   2   8   6 74.1269 42.6731   1
   2   8   7 34.7519 24.6195   1
   2   8   8 280.712 63.1864   1
   2   8   9 9.67478 23.3309   1
   2   8  10 30.3014 33.0397   1
   2   8  11 90.4212 40.7741   1
   2   8  12 103.752 46.4265   1
   2   8  13 172.792 59.5579   1
   2   8  14 61.0326 43.3351   1
   2   8  15 19.4644 40.3317   1
   2   8  16-26.2086 27.3744   1
  -2  -9  25 4.20773 29.4068   3
  -2  -9  25 21.5099 21.1407   5
  -2  -9  24 70.3707 32.7428   5
  -2  -9  24-23.4095 30.7872   3
   2   9 -24 40.1824 21.8612   2
  -2  -9  23-72.3115 41.2837   3
   2   9 -23-24.6460 20.3893   2
  -2  -9  23-13.5339 19.8703   5
  -2  -9  22 27.4915 36.9791   3
  -2  -9  22 86.8708 35.5862   5
   2   9 -22 78.3690 38.5638   2
   2   9 -21-5.02158 15.8108   2
  -2  -9  21 11.1203 27.5991   3
  -2  -9  21-4.81181 16.4190   5
  -2  -9  20 66.2345 32.2160   5
  -2  -9  20 117.679 43.6211   1
  -2  -9  20 98.6723 42.8120   3
   2   9 -20 117.074 36.1777   2
  -2  -9  19-12.5449 23.6143   3
  -2  -9  19 36.6603 19.7125   5
  -2  -9  19-30.8948 23.9327   1
   2   9 -19 8.47633 18.8219   2
  -2  -9  18-0.27644 17.7777   1
   2   9 -18 48.5649 24.1815   2
   2   9 -17 13.5056 26.1235   2
  -2  -9  17 12.0756 15.3985   1
   2   9 -16 247.850 54.8106   2
  -2  -9  16 231.577 48.8190   1
   2   9 -16 244.370 21.2061   4
   2   9 -15 345.805 64.0175   2
  -2  -9  15 343.695 57.1212   1
   2   9 -15 344.108 32.0494   4
  -2  -9  14 2.06041 19.3290   1
   2   9 -14 25.6869 9.65533   4
   2   9 -14-1.77159 23.4688   2
  -2  -9  13 17.7504 15.2385   1
   2   9 -13 1.35109 10.9468   4
   2   9 -13 14.3303 20.4566   2
   2   9 -12 548.671 77.2519   2
  -2  -9  12 591.989 70.1515   1
   2   9 -12 513.982 46.8919   4
   2   9 -11 560.374 75.6087   2
  -2  -9  11 518.485 64.2399   1
  -2  -9  10 2256.13 132.515   1
   2   9 -10 2284.78 155.245   2
   2   9  -9 238.488 51.7782   2
  -2  -9   9 203.169 39.6265   1
   2   9  -8 375.578 54.3805   1
  -2  -9   8 310.527 47.0802   1
   2   9  -7 3121.73 158.198   1
  -2  -9   7 3017.29 145.223   1
   2   9  -6 41.0174 24.9682   1
  -2  -9   6 8.65078 12.4096   1
  -2  -9   5 1124.03 87.1771   1
   2   9  -5 1208.32 104.222   1
   2   9  -4 2252.91 137.226   1
  -2  -9   4 2269.89 123.979   1
   2   9  -3 174.669 40.7948   1
  -2  -9   3 216.141 40.2708   1
   2   9  -2 351.799 56.3114   1
  -2  -9   2 425.712 56.5722   1
   2   9  -1 1268.85 107.946   1
  -2  -9   1 1317.78 99.6322   1
   2   9   0 428.359 63.0441   1
  -2  -9   0 422.889 58.7122   1
  -2  -9  -1 370.553 40.2557   5
  -2  -9  -1 433.388 60.2130   1
   2   9   1 348.476 57.5973   1
  -2  -9  -2 662.247 74.9951   1
  -2  -9  -2 675.854 52.5434   5
   2   9   2 559.826 74.9343   1
  -2  -9  -3 100.525 20.4437   5
   2   9   3 102.705 36.1424   1
  -2  -9  -3 93.0484 42.7963   3
  -2  -9  -3 78.2444 27.8156   1
  -2  -9  -4 824.916 112.398   3
  -2  -9  -4 749.754 50.1570   5
   2   9   4 781.336 92.1913   1
  -2  -9  -5 54.0883 13.2169   5
   2   9   5 49.7345 32.8685   1
   2   9   6 414.500 74.2603   1
   2   9   7 5.58258 26.3996   1
   2   9   8 897.754 111.528   1
   2   9   9 21.9869 22.1808   1
   2   9  10 230.661 60.6252   1
   2   9  11 124.699 47.7256   1
   2   9  12 35.0572 32.8592   1
   2   9  13 45.4647 41.8649   1
   2   9  14 9.07592 31.7263   1
   2   9  15-46.4079 43.2340   1
  -2 -10  25-25.2944 24.6912   5
  -2 -10  24 10.9845 23.1665   5
  -2 -10  24-14.7751 27.2100   3
   2  10 -23 19.2489 21.2993   2
  -2 -10  23-24.7887 39.0827   3
  -2 -10  23-41.7374 27.4357   5
  -2 -10  22 34.9199 28.2607   5
  -2 -10  22 21.0956 31.9210   3
   2  10 -22-8.36719 17.3759   2
  -2 -10  21 120.227 48.6456   3
   2  10 -21 102.880 37.7912   2
  -2 -10  21 155.958 46.2967   5
  -2 -10  20 183.323 57.3821   3
  -2 -10  20 109.953 36.9316   5
   2  10 -20 163.485 41.2577   2
  -2 -10  19 50.3343 24.7459   1
  -2 -10  19 60.0038 27.2280   5
   2  10 -19 82.5261 30.8605   2
  -2 -10  18 34.6073 26.3044   5
  -2 -10  18 43.1063 22.5084   1
   2  10 -18-15.7759 20.6180   2
   2  10 -17 116.710 17.3218   4
  -2 -10  17 151.380 40.5153   1
   2  10 -17 147.312 40.3719   2
   2  10 -16 17.4949 20.9756   2
  -2 -10  16-10.6804 14.8350   1
   2  10 -16 16.8210 11.3026   4
  -2 -10  15-23.2073 20.8046   1
   2  10 -15 19.0694 12.9326   4
   2  10 -15-20.4982 17.6567   2
   2  10 -14 20.6670 12.2885   4
   2  10 -14 13.1822 21.2012   2
  -2 -10  14 9.93344 14.9339   1
   2  10 -13-16.1939 30.7927   2
  -2 -10  13-22.7567 20.8142   1
   2  10 -13 6.63292 9.22774   4
  -2 -10  12 178.499 40.5818   1
   2  10 -12 225.197 53.3172   2
   2  10 -12 142.712 28.6617   4
   2  10 -11 88.9258 35.5146   2
  -2 -10  11 84.3824 30.4708   1
  -2 -10  10 503.268 62.1838   1
   2  10 -10 684.821 87.9472   2
  -2 -10   9 73.7104 25.4321   1
   2  10  -9 123.229 34.6093   1
   2  10  -8 690.828 76.2302   1
  -2 -10   8 738.467 72.4751   1
  -2 -10   7 234.509 40.7965   1
   2  10  -7 208.365 43.1860   1
   2  10  -6 76.8124 28.6136   1
  -2 -10   6 67.9102 22.0736   1
   2  10  -5 14.7944 15.8658   1
  -2 -10   5 77.2237 26.1134   1
   2  10  -4 17.9692 24.9038   1
  -2 -10   4 19.0037 11.5874   1
   2  10  -3 239.558 50.2514   1
  -2 -10   3 377.187 54.7774   1
  -2 -10   2-17.9100 14.6297   1
   2  10  -2-22.2614 22.6254   1
   2  10  -1-9.59898 23.6433   1
  -2 -10   1 10.7066 11.9128   5
  -2 -10   1-4.08242 15.3537   1
  -2 -10   0 286.808 51.2523   1
  -2 -10   0 265.773 38.3552   5
   2  10   0 236.801 50.0255   1
  -2 -10  -1 52.2057 16.9425   5
  -2 -10  -1 62.6767 26.5805   1
   2  10   1 74.3860 29.9085   1
  -2 -10  -2 12.8246 13.5984   5
   2  10   2-10.9165 17.3200   1
  -2 -10  -2 1.49538 11.0226   1
  -2 -10  -3 338.990 39.0885   5
   2  10   3 351.134 63.1990   1
  -2 -10  -4 52.5898 15.7959   5
   2  10   4 52.0190 31.6108   1
  -2 -10  -5 27.8784 12.3846   5
   2  10   5 16.3309 26.3936   1
   2  10   6 1229.56 128.191   1
   2  10   7 138.725 48.9054   1
   2  10   8 145.100 49.2773   1
   2  10   9-39.7515 35.6850   1
   2  10  10 95.3295 42.4878   1
   2  10  11-5.49002 34.2288   1
   2  10  12 86.5216 36.8463   1
   2  10  13-80.1256 42.2765   1
   2  10  14-17.0571 22.6176   1
  -2 -11  26 17.7862 21.1137   5
  -2 -11  25 0.55374 17.3110   5
  -2 -11  24 1.73657 24.9241   3
  -2 -11  24 19.6917 23.7301   5
  -2 -11  23 36.5243 34.1594   3
  -2 -11  23 91.3006 36.9720   5
   2  11 -23 10.4720 13.3867   2
  -2 -11  22 48.1637 26.4514   5
   2  11 -22 43.7505 23.2708   2
  -2 -11  21 22.1684 25.3305   5
  -2 -11  21 89.0764 45.2962   3
   2  11 -21 28.5893 20.8276   2
  -2 -11  20 274.094 58.6164   5
   2  11 -20 262.163 50.8170   2
   2  11 -19 62.9916 29.8589   2
  -2 -11  19 37.5299 25.7442   1
  -2 -11  19 40.3530 23.7018   5
   2  11 -18 17.4010 9.58806   4
  -2 -11  18 15.9765 17.3351   5
  -2 -11  18-11.7002 21.0739   1
   2  11 -18 59.5008 29.6166   2
  -2 -11  17 432.078 70.4610   5
   2  11 -17 357.279 39.7816   4
  -2 -11  17 399.651 62.5178   1
   2  11 -17 420.193 68.5060   2
  -2 -11  16 66.9470 29.5242   5
  -2 -11  16-3.18247 21.3456   1
   2  11 -16 26.0634 23.6908   2
   2  11 -16 50.4825 16.0926   4
   2  11 -15-5.84792 11.4375   4
  -2 -11  15-36.5384 25.7494   1
   2  11 -15 36.3892 23.9482   2
   2  11 -14 873.778 71.5132   4
  -2 -11  14 952.232 91.0508   1
   2  11 -14 783.611 95.2555   2
   2  11 -13 14.3528 22.6628   2
  -2 -11  13 9.36977 17.1938   1
   2  11 -13 22.9269 20.0053   4
   2  11 -12 170.083 52.7248   2
  -2 -11  12 127.375 33.5694   1
   2  11 -11 183.532 52.5830   2
  -2 -11  11 195.815 38.5538   1
  -2 -11  10 663.392 70.8959   1
   2  11 -10 584.675 76.3860   1
  -2 -11   9 22.8635 18.4413   1
   2  11  -9 26.7526 23.3403   1
   2  11  -8 528.856 69.3113   1
  -2 -11   8 606.697 66.7465   1
   2  11  -7 10.7539 18.0062   1
  -2 -11   7-1.06866 11.8706   1
  -2 -11   6 152.164 35.5667   1
   2  11  -6 144.392 45.0976   1
   2  11  -5 578.363 73.5842   1
  -2 -11   5 723.114 74.4674   1
   2  11  -4 581.196 74.7300   1
  -2 -11   4 637.671 66.4627   5
  -2 -11   4 597.118 68.0338   1
  -2 -11   3-7.33900 10.2979   1
   2  11  -3 48.2150 31.4936   1
  -2 -11   2 513.756 67.9478   1
   2  11  -2 428.840 67.2356   1
  -2 -11   1 2.96441 11.3827   1
   2  11  -1 11.3593 15.3219   1
  -2 -11   0 1624.95 123.200   1
   2  11   0 1320.22 121.153   1
   2  11   1 466.632 72.6541   1
  -2 -11  -1 515.317 52.9407   5
   2  11   2 1171.85 121.443   1
  -2 -11  -2 1090.80 74.3386   5
   2  11   3 335.842 66.8588   1
  -2 -11  -3 328.063 40.0101   5
  -2 -11  -4 5.55398 11.0347   5
   2  11   4 9.89816 20.0272   1
   2  11   5 166.619 60.0470   1
   2  11   6 24.9357 27.6664   1
   2  11   7 6.94490 20.7420   1
   2  11   8 72.9726 42.3476   1
   2  11   9 35.9114 31.6794   1
   2  11  10 20.4958 23.4600   1
   2  11  11 108.145 48.0253   1
   2  11  12-81.3074 52.1165   1
  -2 -12  26 94.5732 50.7648   5
  -2 -12  25-77.6077 39.2328   5
  -2 -12  24 111.695 64.3287   3
  -2 -12  24 181.717 57.1086   5
  -2 -12  23-46.4831 36.8540   3
  -2 -12  23-0.17814 21.5070   5
  -2 -12  22-13.4728 24.0399   5
   2  12 -22 37.3550 23.2965   2
   2  12 -21 32.7259 25.3814   2
  -2 -12  21-1.80127 18.6489   5
   2  12 -20-3.74858 14.0000   2
  -2 -12  20 20.7324 24.6851   5
   2  12 -19 59.3251 16.9239   4
  -2 -12  19 95.4759 37.8729   5
   2  12 -19 107.515 37.1225   2
  -2 -12  18 343.360 65.2917   5
   2  12 -18 303.573 40.1708   4
   2  12 -18 329.820 59.5265   2
  -2 -12  18 361.718 57.5866   1
  -2 -12  17 84.9433 30.8254   1
  -2 -12  17 65.8226 32.7299   5
   2  12 -17 89.7790 32.3961   2
   2  12 -17 90.1666 25.7821   4
  -2 -12  16 212.884 45.5758   1
  -2 -12  16 324.478 61.6961   5
   2  12 -16 149.750 36.0324   4
   2  12 -16 182.273 44.4484   2
  -2 -12  15 1411.10 123.493   5
   2  12 -15 1333.82 124.150   2
  -2 -12  15 1370.43 108.181   1
   2  12 -15 1337.65 96.1067   4
   2  12 -14 588.227 82.5194   2
   2  12 -14 663.607 67.0584   4
  -2 -12  14 651.289 74.5566   1
  -2 -12  14 811.597 89.7576   5
   2  12 -13 15.6064 22.1823   2
  -2 -12  13-5.49415 12.9859   1
   2  12 -13-9.99901 13.3207   4
  -2 -12  13 28.9680 20.2433   5
   2  12 -12 63.9180 29.6179   2
  -2 -12  12 26.0584 16.3102   1
  -2 -12  11 57.5234 24.6546   1
   2  12 -11 70.0720 37.0010   2
   2  12 -10 147.918 39.9612   1
  -2 -12  10 160.626 37.0358   1
   2  12  -9 43.6124 27.4008   1
  -2 -12   9 3.96775 17.0846   1
   2  12  -8 917.831 96.3936   1
  -2 -12   8 979.926 86.6852   1
  -2 -12   7 147.293 33.4947   1
  -2 -12   7 178.224 39.3451   5
   2  12  -7 109.390 35.0507   1
   2  12  -6 178.302 46.3382   1
  -2 -12   6 115.991 31.8599   5
  -2 -12   6 130.675 31.5927   1
   2  12  -5 104.996 37.7289   1
  -2 -12   5 108.159 28.0919   1
  -2 -12   5 87.4010 26.9005   5
  -2 -12   4 654.181 75.0034   1
   2  12  -4 658.216 84.3681   1
  -2 -12   4 648.127 69.7065   5
  -2 -12   3 15.9786 14.8753   5
  -2 -12   3 24.3966 21.0278   1
   2  12  -3 57.4099 28.2244   1
  -2 -12   2 7.28348 15.0896   1
   2  12  -2 16.0858 26.9492   1
   2  12  -1 16.6681 21.8631   1
  -2 -12   1 33.8540 19.1996   1
   2  12   0 59.9716 32.4788   1
   2  12   1 104.685 40.5930   1
   2  12   2 362.896 69.5729   1
  -2 -12  -2 305.818 43.2780   5
   2  12   3 161.287 53.0662   1
  -2 -12  -3 111.039 24.5450   5
   2  12   4 24.7276 23.0349   1
  -2 -12  -4 67.5010 18.6871   5
   2  12   5-60.9819 39.8553   1
   2  12   6-32.2150 21.0747   1
   2  12   7 13.3056 23.6803   1
   2  12   8 216.037 64.6547   1
   2  12   9 28.9809 40.0086   1
   2  12  10 104.677 57.0212   1
   2  12  11-94.5280 47.5651   1
  -2 -13  26 0.20967 19.5151   5
  -2 -13  25 15.4121 22.4504   5
  -2 -13  24 81.4419 52.4519   3
  -2 -13  24 0.19528 23.5748   5
  -2 -13  23 18.7062 23.6570   5
  -2 -13  22 159.232 49.5790   5
   2  13 -22 127.554 36.0003   2
  -2 -13  21-39.9914 27.2527   5
   2  13 -21-29.3705 20.9375   2
  -2 -13  20 7.25938 22.3829   5
   2  13 -20-11.6506 14.9002   2
  -2 -13  19-4.27855 18.2114   5
   2  13 -19 33.3219 19.7835   2
   2  13 -19 32.7397 14.7247   4
   2  13 -18-14.7204 15.9960   2
  -2 -13  18 7.62035 17.0401   1
  -2 -13  18 4.10925 22.3392   5
   2  13 -18 12.2369 15.0762   4
   2  13 -17-4.49790 13.7890   4
  -2 -13  17-8.32006 17.3214   1
   2  13 -17-37.5444 29.9817   2
  -2 -13  17 53.3822 29.9523   5
  -2 -13  16 40.4065 24.9576   1
  -2 -13  16-5.94358 17.0514   5
   2  13 -16 16.6598 12.7392   4
   2  13 -16 1.76420 27.9324   2
   2  13 -15 14.3457 30.4126   2
  -2 -13  15-3.27309 19.9575   5
  -2 -13  15 22.0307 19.9305   1
   2  13 -14 56.7978 28.8016   2
  -2 -13  14 40.5786 16.5720   1
  -2 -13  14 119.173 38.4014   5
   2  13 -13 253.139 61.5224   2
  -2 -13  13 173.487 43.6080   5
  -2 -13  13 140.409 33.6204   1
  -2 -13  12 235.269 43.0981   1
   2  13 -12 266.863 62.6681   2
  -2 -13  12 254.159 52.0224   5
  -2 -13  11 22.6164 18.2016   5
   2  13 -11-37.6876 30.7715   1
  -2 -13  11 12.6229 17.3847   1
  -2 -13  10 87.1752 32.0454   5
   2  13 -10 47.8868 29.0080   1
  -2 -13  10 116.326 33.0536   1
  -2 -13   9 35.8717 19.4867   1
  -2 -13   9 52.7791 26.2849   5
   2  13  -9 18.5202 23.6583   1
   2  13  -8 1474.88 127.504   1
  -2 -13   8 1571.77 118.881   5
  -2 -13   8 1565.32 111.510   1
  -2 -13   7 71.2053 24.9113   1
  -2 -13   7 32.4660 22.2029   5
   2  13  -7 24.5082 23.6329   1
   2  13  -6 369.108 66.7419   1
  -2 -13   6 358.211 56.2842   1
  -2 -13   6 312.582 50.3054   5
  -2 -13   5 1692.88 122.122   1
   2  13  -5 1735.00 140.253   1
  -2 -13   5 1642.53 117.231   5
  -2 -13   4 3.40370 17.6215   5
   2  13  -4-37.2091 30.2031   1
  -2 -13   4 6.11130 18.0768   1
  -2 -13   3 211.672 46.4692   1
   2  13  -3 246.265 55.4935   1
  -2 -13   3 249.348 44.5535   5
  -2 -13   2 187.337 41.0361   5
   2  13  -2 175.571 46.1737   1
  -2 -13   1 210.022 40.4670   5
   2  13  -1 223.216 55.9343   1
   2  13   0 154.233 47.4858   1
   2  13   1 189.556 54.2398   1
   2  13   2 1121.53 127.557   1
  -2 -13  -3-23.3348 16.2718   5
   2  13   3 7.79303 25.5877   1
   2  13   4-21.3183 29.3601   1
   2  13   5 114.764 49.4807   1
   2  13   6-39.6329 21.2242   1
   2  13   7 69.7164 39.9198   1
   2  13   8-24.4945 44.4340   1
   2  13   9 2.39192 34.4942   1
   2  13  10 53.7494 43.6008   1
  -2 -14  26 2.63507 22.9604   5
  -2 -14  25-31.8525 29.9329   5
  -2 -14  24-30.3980 27.4040   5
  -2 -14  23 66.5642 42.2957   5
  -2 -14  22 196.065 59.5299   5
  -2 -14  21 47.7630 28.3033   5
   2  14 -21 104.928 34.4715   2
  -2 -14  20 26.3208 24.1218   5
   2  14 -20-12.3038 21.8287   2
  -2 -14  19 140.073 44.2611   5
   2  14 -19 202.983 50.7031   2
   2  14 -19 120.109 29.9611   4
  -2 -14  18 160.932 47.6350   5
   2  14 -18 166.284 39.0914   4
   2  14 -18 153.706 44.7423   2
  -2 -14  17 74.3442 35.5785   5
  -2 -14  17 63.7553 28.1724   1
   2  14 -17 45.8295 22.9026   2
   2  14 -16 8.83414 19.1974   2
  -2 -14  16-7.49966 17.1510   1
  -2 -14  16-21.5481 20.1350   5
   2  14 -15-26.2478 18.6690   2
  -2 -14  15 80.8698 28.6078   5
  -2 -14  15 41.6357 23.5729   1
  -2 -14  14 149.872 35.3049   1
   2  14 -14 144.505 51.9972   2
  -2 -14  14 145.314 38.4358   5
   2  14 -13-18.1875 32.1084   2
  -2 -14  13-36.3570 29.7929   5
  -2 -14  13 1.25868 12.0086   1
   2  14 -12 52.1748 27.0397   1
  -2 -14  12-33.4464 28.0941   5
  -2 -14  12 2.41926 13.3896   1
  -2 -14  11 99.4125 26.5365   1
  -2 -14  11 65.6292 26.2949   5
   2  14 -11 94.6060 40.4913   1
  -2 -14  10 2235.11 149.844   5
  -2 -14  10 2156.71 131.222   1
   2  14 -10 2203.54 153.822   1
  -2 -14   9 205.105 42.4192   1
  -2 -14   9 160.623 39.6096   5
   2  14  -9 128.348 37.7088   1
  -2 -14   8 84.9302 34.0595   5
   2  14  -8 45.1361 38.4202   1
  -2 -14   8 81.9942 29.9599   1
   2  14  -7-11.9677 26.5998   1
  -2 -14   7-17.6849 17.2036   5
  -2 -14   7 15.4825 16.6066   1
   2  14  -6 67.9353 31.5861   1
  -2 -14   6 91.4520 28.3442   1
  -2 -14   6 85.6094 30.1810   5
   2  14  -5-11.0099 27.1509   1
  -2 -14   5-36.1655 18.5617   5
  -2 -14   5 37.3329 20.6889   1
  -2 -14   4 136.640 35.5632   5
   2  14  -4 139.632 43.9727   1
   2  14  -3-17.0199 19.5710   1
  -2 -14   3 33.4876 16.9827   5
   2  14  -2 330.370 70.0736   1
  -2 -14   2 279.935 46.2131   5
   2  14  -1 11.7906 19.0170   1
  -2 -14   1 27.7540 15.7068   5
   2  14   0-27.2931 28.5395   1
  -2 -14   0 6.21788 13.0289   5
   2  14   1 106.363 48.2489   1
   2  14   2 126.188 41.2093   1
   2  14   3 14.7956 29.9185   1
   2  14   4 165.482 54.0102   1
   2  14   5-1.26359 24.0616   1
   2  14   6-10.4028 19.9451   1
   2  14   7 14.9042 24.0058   1
   2  14   8-22.5593 33.1096   1
   2  14   9-21.6996 46.4750   1
  -2 -15  25 4.21098 22.1720   5
  -2 -15  24 15.8002 20.9547   5
  -2 -15  23 58.6411 40.5421   5
  -2 -15  22 41.8449 32.4634   5
  -2 -15  21 12.5041 22.8053   5
   2  15 -21 19.5102 14.6381   2
  -2 -15  20 13.8446 17.1971   5
   2  15 -20 87.6203 34.5304   2
  -2 -15  19 54.7300 33.6865   5
   2  15 -19 66.4027 27.6176   2
  -2 -15  18 19.9813 26.1146   5
   2  15 -18 48.4868 33.6587   2
   2  15 -17 217.182 55.1292   2
  -2 -15  17 158.591 51.8882   5
   2  15 -16 34.5780 27.9433   2
  -2 -15  16-16.1446 20.6887   5
  -2 -15  16-4.48463 12.2178   1
   2  15 -16 5.93995 14.6236   4
   2  15 -15 8.74289 25.8228   2
  -2 -15  15 34.0536 23.5790   5
   2  15 -15 24.7276 23.2037   4
  -2 -15  15-34.5645 20.1939   1
  -2 -15  14-7.37098 10.9314   1
   2  15 -14 27.4316 27.3723   2
  -2 -15  14-13.8436 25.5382   5
   2  15 -14 16.5194 14.1232   4
  -2 -15  13 8.81350 13.9589   1
   2  15 -13-8.07911 23.9046   2
  -2 -15  13-27.7694 28.6156   5
  -2 -15  12 61.2649 27.4582   1
  -2 -15  12 13.9279 17.8134   5
   2  15 -12 32.3949 25.7121   1
  -2 -15  11 791.460 94.6727   5
   2  15 -11 747.793 93.1268   1
  -2 -15  11 782.302 80.4852   1
  -2 -15  10-2.40242 15.6731   5
  -2 -15  10 9.24022 15.6341   1
   2  15 -10 20.9319 30.6670   1
  -2 -15   9 164.600 38.8959   1
  -2 -15   9 130.339 38.0943   5
   2  15  -9 110.870 25.8234   1
  -2 -15   8 1107.41 100.202   1
   2  15  -8 1153.78 119.612   1
  -2 -15   8 1259.67 113.683   5
   2  15  -7 569.048 85.6095   1
  -2 -15   7 627.294 80.0635   1
  -2 -15   7 693.378 83.1054   5
   2  15  -6 262.215 57.1677   1
  -2 -15   6 203.853 47.9862   5
  -2 -15   5 136.978 38.6830   5
   2  15  -5 118.272 44.7975   1
   2  15  -4 54.6384 37.4413   1
  -2 -15   4 144.530 38.4851   5
   2  15  -3 232.802 59.4368   1
  -2 -15   3 124.057 34.2166   5
   2  15  -2 61.7726 37.5827   1
  -2 -15   2 75.2114 29.1440   5
   2  15  -1 125.275 45.3572   1
  -2 -15   1 186.458 41.2177   5
   2  15   0 458.270 82.7146   1
  -2 -15   0 512.546 66.3150   5
  -2 -15  -1 29.2643 18.0057   5
   2  15   1 26.7442 27.3220   1
   2  15   2 59.1313 40.0839   1
   2  15   3 58.4981 35.2201   1
   2  15   4 16.7611 27.6500   1
   2  15   5 56.9864 40.9004   1
   2  15   6 279.807 75.5964   1
   2  15   7 42.7704 45.8201   1
  -2 -16  24-22.9712 28.9344   5
  -2 -16  23-17.4275 26.2658   5
  -2 -16  22 1.24529 24.1742   5
  -2 -16  21 31.1188 30.7630   5
  -2 -16  20-1.15140 19.6764   5
   2  16 -20-27.1889 18.9524   2
  -2 -16  19-36.6847 28.4949   5
   2  16 -19-4.65307 18.3581   4
   2  16 -19-26.0314 27.2316   2
   2  16 -18-10.7961 14.5272   4
  -2 -16  18-6.61739 19.0686   5
   2  16 -18-15.7404 28.3308   2
   2  16 -17 259.825 59.6430   2
   2  16 -17 219.942 48.2092   4
  -2 -16  17 217.313 56.3657   5
   2  16 -16 405.221 76.8495   2
  -2 -16  16 405.489 76.0896   5
   2  16 -16 304.440 55.2777   4
  -2 -16  15 107.871 31.7265   1
   2  16 -15 106.725 39.8007   2
   2  16 -15 77.8679 33.0565   4
  -2 -16  15 19.8649 13.3366   5
  -2 -16  14 288.824 49.1623   1
   2  16 -14 232.265 63.2558   2
   2  16 -14 224.067 49.3056   4
  -2 -16  14 230.999 57.1718   5
  -2 -16  13 31.7337 17.4041   1
   2  16 -13 60.3430 29.7783   1
  -2 -16  13 77.0747 36.4449   5
   2  16 -12 1100.51 115.025   1
  -2 -16  12 944.946 108.129   5
  -2 -16  12 1021.08 92.9770   1
  -2 -16  11 109.000 33.3499   1
  -2 -16  11 116.106 39.6739   5
   2  16 -11 127.468 34.7962   1
   2  16 -10-3.93604 27.8973   1
  -2 -16  10 0.57320 17.9610   5
  -2 -16  10 1.79240 19.6732   1
  -2 -16   9 190.371 48.9678   5
   2  16  -9 113.769 42.7454   1
  -2 -16   9 185.405 40.8997   1
   2  16  -8 283.017 62.7681   1
  -2 -16   8 393.151 67.2827   5
  -2 -16   8 310.620 56.3908   1
   2  16  -7 238.151 58.0559   1
  -2 -16   7 276.233 57.9350   5
   2  16  -6 183.263 53.9821   1
  -2 -16   6 190.825 47.7165   5
   2  16  -5 12.4971 26.2528   1
  -2 -16   5 3.05878 17.5170   5
  -2 -16   4-8.54217 16.5917   5
   2  16  -4 90.0106 35.4043   1
   2  16  -3 50.3012 33.2871   1
  -2 -16   3 60.7185 24.0845   5
  -2 -16   2-25.1663 15.4313   5
   2  16  -2-15.1857 32.7905   1
   2  16  -1-6.91133 26.1904   1
  -2 -16   1-4.75599 13.5501   5
   2  16   0 38.0006 34.9914   1
  -2 -16   0-12.1111 15.3107   5
   2  16   1 42.2033 36.5666   1
  -2 -16  -1 13.4649 13.7031   5
   2  16   2 64.6528 38.9533   1
  -2 -16  -2-25.4796 23.9197   5
   2  16   3 83.2064 50.6860   1
   2  16   4 202.169 68.1439   1
   2  16   5 27.3375 41.1006   1
   2  16   6-100.511 44.6753   1
  -2 -17  23 4.96250 25.0885   5
  -2 -17  22 7.38856 22.7604   5
  -2 -17  21 10.6949 18.0073   5
  -2 -17  20 0.20297 16.5710   5
  -2 -17  19-11.5568 18.6073   5
   2  17 -19-29.0198 24.2872   2
   2  17 -19-27.6649 21.3641   4
   2  17 -18 44.3526 29.0474   2
  -2 -17  18 110.595 41.9685   5
   2  17 -18 129.999 37.8206   4
   2  17 -17 110.134 41.5189   2
  -2 -17  17 143.734 44.5590   5
   2  17 -17 184.473 46.3477   4
   2  17 -16 28.0805 21.0884   2
  -2 -17  16 50.2856 33.7642   5
   2  17 -16 34.5180 22.1178   4
  -2 -17  15 21.6858 30.1048   5
   2  17 -15 72.3673 38.2557   2
   2  17 -15 27.1986 21.0065   4
  -2 -17  14 266.216 60.4820   5
   2  17 -14 304.607 73.8663   2
  -2 -17  14 351.878 55.3000   1
  -2 -17  13 6.59185 13.4214   1
   2  17 -13-6.13788 23.7921   1
  -2 -17  13 6.59567 15.8155   5
  -2 -17  12 93.5727 39.5567   5
   2  17 -12 55.4531 37.5235   1
  -2 -17  12 67.3499 26.6433   1
   2  17 -11 40.7056 26.3146   1
  -2 -17  11 33.2851 22.1255   1
  -2 -17  11 39.4510 23.9261   5
  -2 -17  10 32.8797 23.2335   5
   2  17 -10 34.7387 27.1714   1
  -2 -17  10 27.2188 23.1199   1
  -2 -17   9 78.4107 30.6588   5
   2  17  -9 18.1139 26.2052   1
  -2 -17   8 16.8486 19.5300   5
   2  17  -8-5.04750 28.0307   1
   2  17  -7 27.5752 37.1807   1
  -2 -17   7 26.4571 22.0067   5
   2  17  -6 182.144 60.4955   1
  -2 -17   6 98.2071 33.2747   5
   2  17  -5 52.2850 32.1125   1
  -2 -17   5 9.19939 15.2818   5
   2  17  -4 46.3368 30.2976   1
  -2 -17   4 26.5906 21.9469   5
   2  17  -3 131.455 44.0461   1
  -2 -17   3 170.873 45.5061   5
   2  17  -2-30.8302 31.4718   1
  -2 -17   2 39.1560 23.2366   5
   2  17  -1 1.45252 29.1974   1
  -2 -17   1-6.01775 11.7885   5
   2  17   0 18.1101 26.0906   1
  -2 -17   0 16.9855 15.3068   5
   2  17   1 40.4958 37.5903   1
  -2 -17  -1-16.8508 22.1747   5
   2  17   2 51.0205 31.6373   1
   2  17   3-19.1935 30.7683   1
   2  17   4 54.8765 34.1922   1
   2  17   5 167.363 67.5143   1
  -2 -18  22-41.6841 33.7182   5
  -2 -18  21 62.6555 59.7494   5
  -2 -18  20 75.1497 40.6967   5
  -2 -18  19 133.191 52.1514   5
   2  18 -19 91.3214 38.7763   4
   2  18 -19 44.7565 28.9778   2
   2  18 -18 161.381 52.8583   2
   2  18 -18 91.3985 38.1233   4
  -2 -18  18 8.04536 27.6779   5
   2  18 -17 98.3279 39.2845   2
   2  18 -17 71.3083 35.1341   4
  -2 -18  17 69.3870 33.1189   5
   2  18 -16 145.670 52.1985   2
   2  18 -16 139.609 44.8951   4
  -2 -18  16 234.735 60.4638   5
   2  18 -15 3.83373 17.6547   4
   2  18 -15-15.5474 24.3814   2
  -2 -18  15 20.7680 21.8738   5
  -2 -18  14-32.4008 27.9223   5
   2  18 -14 19.9536 28.5833   2
  -2 -18  13 27.9554 23.0786   5
   2  18 -13 116.929 40.1778   1
  -2 -18  12 88.5975 38.9070   5
   2  18 -12 77.4826 34.8993   1
  -2 -18  11-20.4628 25.7812   5
   2  18 -11 77.3604 35.2057   1
   2  18 -10 66.8822 32.8494   1
  -2 -18  10 80.1584 34.5981   5
   2  18  -9 123.166 45.1406   1
  -2 -18   9 170.463 52.8648   5
  -2 -18   8 46.7812 31.3129   5
   2  18  -8 34.9257 22.0570   1
   2  18  -7 25.4752 24.0938   1
  -2 -18   7 47.2143 30.9494   5
  -2 -18   6 353.006 67.5379   5
   2  18  -6 265.249 66.5553   1
   2  18  -5 68.3430 32.7264   1
  -2 -18   5 84.6904 34.6203   5
   2  18  -4 6.76390 26.2611   1
  -2 -18   4 4.24126 13.3267   5
   2  18  -3-28.1799 34.1230   1
  -2 -18   3-1.87257 18.1225   5
   2  18  -2-57.0649 41.8457   1
  -2 -18   2 11.2579 21.8463   5
   2  18  -1 2.01629 22.2321   1
  -2 -18   1-35.2419 23.6603   5
  -2 -18   0 34.9264 26.1026   5
   2  18   0-14.1914 30.3363   1
   2  18   1 25.8999 32.2413   1
   2  18   2-31.9391 29.1400   1
   2  18   3-44.0364 38.8390   1
  -2 -19  20 31.8985 33.1932   5
  -2 -19  19 18.5811 31.7676   5
   2  19 -18 8.45816 20.6120   2
  -2 -19  18 53.5458 52.9070   5
   2  19 -18 108.161 35.9389   4
   2  19 -17 70.8024 40.4625   2
  -2 -19  17 41.1662 35.9340   5
   2  19 -17 25.9312 16.4541   4
   2  19 -16 88.0366 33.0892   2
  -2 -19  16 42.1610 30.0032   5
   2  19 -16 112.875 41.1492   4
   2  19 -15 193.291 60.0214   2
   2  19 -15 68.3259 32.7385   4
  -2 -19  15 156.231 47.3122   5
   2  19 -14-15.5042 35.6883   1
  -2 -19  14-9.63352 23.2561   5
   2  19 -13-1.88003 18.0225   1
  -2 -19  13 13.9606 19.1835   5
  -2 -19  12 68.5904 34.3611   5
   2  19 -12 94.8532 44.0609   1
  -2 -19  11 42.6726 26.9688   5
   2  19 -11 28.1909 26.0254   1
  -2 -19  10 94.2024 41.0720   5
   2  19 -10 21.2011 25.8449   1
  -2 -19   9-4.16031 22.0157   5
   2  19  -9 31.4810 34.0889   1
   2  19  -8-26.3347 27.2241   1
  -2 -19   8-21.7730 22.8842   5
   2  19  -7 298.854 73.7465   1
  -2 -19   7 296.372 65.4448   5
   2  19  -6 135.458 58.7613   1
  -2 -19   6-3.93849 15.9080   5
   2  19  -5 177.829 59.4461   1
  -2 -19   5 163.863 50.4532   5
   2  19  -4 40.4448 35.3750   1
  -2 -19   4 35.6254 29.0392   5
  -2 -19   3-5.83844 15.6477   5
   2  19  -3 33.0014 43.7666   1
   2  19  -2-27.3650 30.7011   1
  -2 -19   2 9.37617 16.5440   5
   2  19  -1 41.7967 41.4644   1
  -2 -19   1-24.0809 25.3785   5
   2  19   0 61.4305 46.4422   1
   2  19   1-62.3136 41.0196   1
   2  19   2 126.268 63.7830   1
  -2 -20  19 59.7688 44.5143   5
  -2 -20  18 36.7140 26.6816   5
   2  20 -18 42.2344 27.8596   4
   2  20 -17 6.84155 27.6217   4
   2  20 -17 19.4398 23.5550   2
  -2 -20  17 15.7224 31.0497   5
   2  20 -16 44.2741 40.1415   2
   2  20 -16 9.79959 19.1052   4
  -2 -20  16 11.3069 33.2065   5
   2  20 -15 31.0115 25.0871   2
  -2 -20  15 61.5745 37.0290   5
   2  20 -15 4.88528 19.4725   4
   2  20 -14 186.130 54.7327   1
  -2 -20  14 74.6383 38.0368   5
  -2 -20  13 83.0243 44.1260   5
   2  20 -13-0.72114 23.4247   1
  -2 -20  12 34.2266 30.7189   5
   2  20 -12 37.3557 19.1971   1
   2  20 -11 57.7855 31.5389   1
  -2 -20  11 27.0411 19.7754   5
  -2 -20  10 43.6344 25.2746   5
   2  20 -10-59.8137 40.6982   1
   2  20  -9 112.700 48.5705   1
  -2 -20   9 47.5528 35.8045   5
   2  20  -8 7.70646 26.1721   1
  -2 -20   8-7.34026 20.4609   5
   2  20  -7-1.53763 30.7565   1
  -2 -20   7-0.36159 17.3605   5
   2  20  -6-26.8043 29.6648   1
  -2 -20   6-7.12007 17.9208   5
   2  20  -5-30.9849 41.1820   1
  -2 -20   5 49.7968 32.9623   5
   2  20  -4 34.3269 26.5235   1
  -2 -20   4-0.17437 23.3033   5
   2  20  -3-48.2960 39.2441   1
  -2 -20   3-26.2096 23.8660   5
   2  20  -2-64.9561 41.3614   1
  -2 -20   2 16.4833 20.9123   5
   2  20  -1-55.8628 40.1421   1
   2  20   0-0.26995 27.9624   1
   2  21 -18 1.51159 23.0286   4
  -2 -21  17 20.2007 37.7194   5
   2  21 -17 87.9753 39.9659   4
   2  21 -16 10.4583 25.9192   2
  -2 -21  16-7.49755 23.2374   5
   2  21 -16 2.27170 21.4678   4
   2  21 -15 37.3533 39.0039   2
  -2 -21  15 109.551 47.5407   5
   2  21 -15 31.6522 65.9274   4
   2  21 -14 107.583 52.5593   1
  -2 -21  14 57.4542 29.1235   5
  -2 -21  13-80.6537 41.2036   5
   2  21 -13 45.5269 33.4405   1
   2  21 -12-5.11760 18.7022   1
  -2 -21  12 34.1564 31.0853   5
  -2 -21  11-12.4386 31.4134   5
   2  21 -11-28.2277 30.2786   1
  -2 -21  10 37.9879 33.3527   5
   2  21 -10 37.9362 36.5952   1
  -2 -21   9 10.8657 20.1770   5
   2  21  -9 14.4705 24.3290   1
   2  21  -8 0.22957 23.8600   1
  -2 -21   8-22.0324 24.5193   5
   2  21  -7 6.84041 22.3885   1
  -2 -21   7 25.2568 31.0628   5
   2  21  -6 14.8055 32.5464   1
  -2 -21   6-48.4170 31.3459   5
   2  21  -5-67.2275 53.9352   1
  -2 -21   5 27.9734 45.9996   5
   2  21  -4-9.74895 25.8697   1
  -2 -21   4-28.8931 26.5011   5
   2  21  -3-88.0928 49.3239   1
  -2 -21   3-63.6349 34.6505   5
   2  21  -2 5.72948 36.9987   1
   2  22 -17 70.7013 45.5945   4
   2  22 -16 32.3756 37.1435   4
  -2 -22  15-6.89831 32.9195   5
   2  22 -15-26.7286 26.6612   4
  -2 -22  14 0.23368 25.9796   5
   2  22 -13-10.8715 27.5169   1
  -2 -22  13 89.5394 46.5885   5
   2  22 -12 8.78019 27.4299   1
  -2 -22  12 4.98938 23.3152   5
   2  22 -11 13.2974 23.8478   1
  -2 -22  11-6.92152 21.5674   5
   2  22 -10 1.59343 27.1981   1
  -2 -22  10 36.9553 36.6794   5
  -2 -22   9 95.7427 50.2347   5
   2  22  -9-0.47643 23.3557   1
  -2 -22   8 34.8055 29.5678   5
   2  22  -8 30.4025 33.4000   1
   2  22  -7 11.6410 33.1586   1
  -2 -22   7 42.3141 29.1549   5
   2  22  -6-6.25405 29.0231   1
  -2 -22   6 19.5521 38.5903   5
   2  22  -5 140.944 63.6019   1
  -2 -22   5 27.2905 36.4087   5
   2  22  -4-66.1600 44.5985   1
  -2 -22   4 11.2403 22.9823   5
   2  22  -3-32.4429 37.9072   1
   2  23 -17-91.2523 44.1566   4
   2  23 -16 2.87985 30.0587   4
   2  23 -15 74.6079 37.1737   4
  -2 -23  12-38.2967 41.9757   5
   2  23 -11 8.59155 24.9244   1
  -2 -23  11-29.8774 29.5400   5
  -2 -23  10 16.1894 37.9330   5
   2  23 -10-111.275 51.6961   1
  -2 -23   9-43.7303 34.1144   5
   2  23  -9 20.7722 24.4543   1
   2  23  -8 1.32313 33.9267   1
  -2 -23   8-0.23279 17.6302   5
   2  23  -7 54.7985 50.1806   1
  -2 -23   7-54.1070 36.8084   5
   2  23  -6-76.9119 46.4336   1
  -2 -23   6 0.91402 30.5950   5
  -2 -23   5 30.2562 36.4253   5
   2  23  -5 42.2605 40.2211   1
   2  24 -17-34.1988 34.2502   4
   2  24 -16 0.23917 28.7530   4
   2  24 -15 29.3836 38.6760   4
  -2 -24   9-23.1222 30.0597   5
   2  24  -9 1.62264 39.4958   1
  -2 -24   8 12.8069 24.4905   5
   2  24  -8 63.2973 63.7511   1
   2  24  -7-63.2722 50.5859   1
  -2 -24   7 11.4623 30.1224   5
  -3  23  -2 0.21283 41.3864   1
  -3  23  -3 54.2034 45.7293   1
  -3  22   0 87.7251 49.7363   1
  -3  22  -1 25.7290 28.6249   1
  -3  22  -2-15.2446 24.8618   1
  -3  22  -3 42.5742 38.7942   1
  -3  22  -4 29.5167 30.3493   1
  -3  22  -5-48.5007 30.2782   1
  -3  22  -8-33.1755 27.0205   4
  -3  22  -9 15.3949 26.9028   4
  -3  22 -10 34.3916 41.2262   4
  -3  22 -11-62.2947 45.3930   4
  -3  22 -12 3.82663 25.3396   4
  -3  22 -13 88.6491 58.0110   4
  -3  22 -14 3.91116 43.1100   4
  -3  22 -15-42.9724 62.7069   4
  -3  22 -16 10.5146 41.1912   4
  -3  22 -17 15.7412 41.2671   4
  -3  21   1 116.655 59.9845   1
  -3  21   0 5.51837 29.0167   1
  -3  21  -1 26.3082 38.9503   1
  -3  21  -2 0.36557 18.5231   1
  -3  21  -3 23.9885 29.7801   1
  -3  21  -3 2.26143 28.6889   4
  -3  21  -4 20.1144 23.9778   1
  -3  21  -4-82.7246 48.6041   4
  -3  21  -5 99.9230 60.5802   4
  -3  21  -5-4.40170 15.4218   1
  -3  21  -6 26.6116 16.9604   1
  -3  21  -6 35.8020 29.4382   4
  -3  21  -7 295.752 86.3680   4
  -3  21  -8 0.54611 30.5490   4
  -3  21  -9 20.2083 27.7680   4
  -3  21 -10 14.2796 21.7246   4
  -3  21 -11 65.7371 38.0523   4
  -3  21 -12-53.5063 48.7735   4
  -3  21 -13-0.28214 26.5039   4
  -3  21 -14 70.3347 47.7053   4
  -3  21 -15 14.2352 37.3378   4
  -3  21 -16 0.29602 31.0414   4
  -3  21 -17 39.6148 41.3588   4
  -3  21 -18 19.4399 42.1959   4
  -3  21 -19 115.930 73.4121   4
  -3  21 -20 5.07153 42.7875   4
  -3  21 -21 1.60726 52.9682   4
  -3  20   3-21.3009 28.0010   1
  -3  20   2 88.2551 41.4839   1
  -3  20   1-43.9159 32.7115   1
  -3  20   0 89.0750 38.1729   1
  -3  20   0 116.421 61.6919   4
  -3  20  -1 34.2962 32.0084   1
  -3  20  -1 7.83674 37.2085   4
  -3  20  -2 13.1475 22.2439   1
  -3  20  -2 59.3629 45.8762   4
  -3  20  -3 14.0794 24.3721   1
  -3  20  -3 14.4847 33.8995   4
  -3  20  -4 19.0270 26.1089   4
  -3  20  -4 11.7418 23.9085   1
  -3  20  -5 63.2240 27.0597   1
  -3  20  -5 93.0501 47.9633   4
  -3  20  -6 98.6980 36.2514   1
  -3  20  -6 83.7101 45.9499   4
  -3  20  -7 32.6672 21.6757   1
  -3  20  -7 13.8537 28.9171   4
  -3  20  -8-17.1756 28.3826   4
  -3  20  -8-12.3365 19.7034   1
  -3  20  -9 31.3701 35.6740   4
  -3  20 -10 23.5787 43.1116   4
  -3  20 -11-8.62235 34.0907   4
  -3  20 -12 10.8320 24.9696   4
  -3  20 -13-1.07551 23.7103   4
  -3  20 -14-14.7868 33.9966   4
  -3  20 -15 12.7997 26.6798   4
  -3  20 -16 126.792 62.1202   4
  -3  20 -17 67.5975 47.4574   4
  -3  20 -18 30.5264 34.5062   4
  -3  20 -19 10.5031 27.8331   4
  -3  20 -20-58.2493 43.8006   4
  -3  20 -21 1.85130 40.9689   4
  -3  20 -22-46.3092 46.6635   4
  -3  19   4 25.8660 37.1840   1
  -3  19   3-23.9927 28.7570   1
  -3  19   2 47.9015 35.4521   1
  -3  19   1 0.19055 20.6709   1
  -3  19   1 24.7776 39.5322   4
  -3  19   0 64.9522 41.7778   4
  -3  19   0 60.1205 35.1109   1
  -3  19  -1-33.1568 24.1327   4
  -3  19  -1-25.2663 26.3367   1
  -3  19  -2 86.4215 50.8838   4
  -3  19  -2 64.6166 32.5145   1
  -3  19  -3 15.8192 19.0160   1
  -3  19  -3 203.588 70.6725   4
  -3  19  -4 31.1063 31.3685   4
  -3  19  -4 77.6194 32.9052   1
  -3  19  -5 10.7341 24.4233   1
  -3  19  -5 14.4827 33.7849   4
  -3  19  -6 28.9425 18.4996   1
  -3  19  -6 113.502 46.4170   4
  -3  19  -7 28.5936 19.9452   1
  -3  19  -7 90.2006 32.5658   4
  -3  19  -8 20.4724 11.0341   1
  -3  19  -8 4.33642 21.2482   4
  -3  19  -9 64.9244 47.5276   4
  -3  19  -9 52.0104 24.2452   1
  -3  19 -10-13.7069 28.2359   4
  -3  19 -11 100.325 49.8841   4
  -3  19 -12 71.2504 42.8017   4
  -3  19 -13-50.3243 36.8387   4
  -3  19 -14 28.9375 36.6280   4
  -3  19 -15-65.0370 43.7597   4
  -3  19 -16 3.00543 34.1237   4
  -3  19 -17 13.9863 25.8134   4
  -3  19 -18 68.4903 47.7991   4
  -3  19 -19 68.3429 53.5523   4
  -3  19 -20 81.2987 49.8160   4
  -3  19 -21 144.311 66.9481   4
  -3  19 -22 41.0602 48.0295   4
  -3  18   5 7.07711 23.3637   1
  -3  18   4-26.6005 29.5100   1
  -3  18   3 97.2695 45.0435   1
  -3  18   2 11.8976 25.8609   1
  -3  18   1 92.0275 38.9918   1
  -3  18   0-10.6795 21.5093   4
  -3  18   0-26.0428 19.3164   1
  -3  18  -1 32.6608 28.4119   4
  -3  18  -1 9.19324 22.4265   1
  -3  18  -2 285.928 73.0302   4
  -3  18  -2 202.135 49.8298   1
  -3  18  -3 112.100 39.9015   1
  -3  18  -3 358.770 83.3848   4
  -3  18  -4 56.4219 40.1923   4
  -3  18  -4-7.41308 19.5393   1
  -3  18  -5 96.8703 40.5309   4
  -3  18  -5 60.9711 21.5509   1
  -3  18  -6 315.052 53.4590   1
  -3  18  -6 223.431 53.1234   2
  -3  18  -6 275.716 73.8958   4
  -3  18  -7 57.7393 21.7597   1
  -3  18  -7 114.706 52.1924   4
  -3  18  -7 35.6104 30.4621   2
  -3  18  -8 292.310 46.1182   1
  -3  18  -8 352.206 81.4516   4
  -3  18  -9 291.930 76.3587   4
  -3  18  -9 236.253 39.0643   1
  -3  18 -10 42.5503 16.3200   1
  -3  18 -10-78.3082 43.5010   4
  -3  18 -11-39.2482 23.8741   4
  -3  18 -12 120.391 52.5944   4
  -3  18 -13 79.1876 31.6924   4
  -3  18 -14 36.7419 42.4702   4
  -3  18 -15-3.84282 30.2317   4
  -3  18 -16 25.8114 27.8833   4
  -3  18 -17-74.9643 46.5757   4
  -3  18 -18-47.0166 39.2430   4
  -3  18 -19-31.4984 33.8623   4
  -3  18 -20 18.3300 39.3965   4
  -3  18 -21 8.04722 33.0133   4
  -3  18 -22 78.3492 76.2115   4
  -3  18 -23 28.1954 35.5159   4
  -3  17   6 8.98790 25.5031   1
  -3  17   5 86.3710 41.5159   1
  -3  17   4 123.729 49.2644   1
  -3  17   3 32.5769 30.0839   1
  -3  17   2 30.2607 30.7839   1
  -3  17   1 53.9158 27.1973   1
  -3  17   0 34.6445 31.4180   1
  -3  17   0 13.4217 24.9703   4
  -3  17  -1 221.721 67.2441   4
  -3  17  -1 270.693 57.8927   1
  -3  17  -2 82.5855 47.0502   4
  -3  17  -2 90.6893 34.5873   1
  -3  17  -3 133.660 39.5425   1
  -3  17  -3 211.447 69.8200   4
  -3  17  -4 59.5000 32.2971   2
  -3  17  -4 124.059 44.4254   4
  -3  17  -4 45.2349 19.9103   1
  -3  17  -5 221.626 51.7982   2
  -3  17  -5 142.692 60.7405   4
  -3  17  -5 195.099 44.1253   1
  -3  17  -6 3.53982 15.0548   1
  -3  17  -6-2.32594 29.9588   4
  -3  17  -6-4.61584 16.3034   2
  -3  17  -7 40.1352 19.9252   1
  -3  17  -7 11.8554 15.8957   2
  -3  17  -7-32.0392 33.7565   4
  -3  17  -8 83.0897 23.8127   1
  -3  17  -8 121.040 52.9831   4
  -3  17  -9 71.5180 26.7383   2
  -3  17  -9 91.6406 41.6855   4
  -3  17  -9 131.731 27.0564   1
  -3  17 -10 220.462 32.0036   1
  -3  17 -10 186.899 34.5838   2
  -3  17 -10 179.007 53.6602   4
  -3  17 -11-1.33577 6.55536   1
  -3  17 -11 21.6726 25.1444   4
  -3  17 -12 8.94674 24.4201   4
  -3  17 -13 105.155 42.0092   4
  -3  17 -14-50.4080 46.8052   4
  -3  17 -15 16.5842 25.1708   4
  -3  17 -16 59.9517 39.3230   4
  -3  17 -17-25.1826 32.1922   4
  -3  17 -18-19.8024 44.2858   4
  -3  17 -19-11.2161 30.6061   4
  -3  17 -20-22.0547 30.7918   4
  -3  17 -21 115.860 66.4051   4
  -3  17 -22 7.22716 26.8497   4
  -3  17 -23 73.3613 60.8010   4
  -3  16   8 42.1539 42.6368   1
  -3  16   7 62.8766 36.6909   1
  -3  16   6 51.2049 33.8256   1
  -3  16   5 211.623 62.2202   1
  -3  16   4 80.1212 41.1724   1
  -3  16   3-13.7410 21.0012   1
  -3  16   2 90.2037 32.2096   1
  -3  16   1 18.5401 24.0159   1
  -3  16   0 454.356 73.2635   1
  -3  16   0 355.916 76.4118   4
  -3  16  -1 17.6944 15.6970   1
  -3  16  -1 60.8618 38.8573   4
  -3  16  -2 77.9325 31.0081   4
  -3  16  -2 1.55531 19.9119   1
  -3  16  -3 341.386 56.0995   1
  -3  16  -3 278.194 68.2064   4
  -3  16  -3 276.939 58.7485   2
  -3  16  -4 26.6865 15.6000   1
  -3  16  -4-25.2746 30.1257   4
  -3  16  -4 18.7405 15.9666   2
  -3  16  -5 30.2911 21.7847   2
  -3  16  -5 40.5629 29.7145   4
  -3  16  -5 2.99050 17.5554   1
  -3  16  -6 234.725 48.2641   2
  -3  16  -6 244.587 62.9905   4
  -3  16  -6 282.477 46.2837   1
  -3  16  -7-2.81755 12.8680   1
  -3  16  -7 3.59410 20.1299   4
  -3  16  -8 634.516 70.0037   2
  -3  16  -8 705.052 62.2099   1
  -3  16  -8 667.285 107.336   4
  -3  16  -9 707.954 67.2553   2
  -3  16  -9 807.801 62.0515   1
  -3  16  -9 907.658 124.119   4
  -3  16 -10 38.5421 12.1435   1
  -3  16 -10 43.8665 35.6945   4
  -3  16 -10 34.6911 14.3858   2
  -3  16 -11 2.57762 6.21036   2
  -3  16 -11-1.71172 21.4104   4
  -3  16 -12 221.720 67.1447   4
  -3  16 -13-2.69468 22.7699   4
  -3  16 -14-46.2261 35.0308   4
  -3  16 -15 69.8538 41.7665   4
  -3  16 -16 44.0039 37.4129   4
  -3  16 -17 39.1795 32.0014   4
  -3  16 -18 30.2847 29.0516   4
  -3  16 -19-16.4424 26.9225   4
  -3  16 -20 56.0908 47.9466   4
  -3  16 -21 33.8786 37.7484   4
  -3  16 -22-32.0385 38.6339   4
  -3  16 -23 8.59735 38.7624   4
  -3  15   9 85.2896 42.2892   1
  -3  15   8 15.7322 28.2102   1
  -3  15   7 51.3524 29.8758   1
  -3  15   6-2.44021 30.2755   1
  -3  15   5-19.4081 30.5955   1
  -3  15   4 27.0205 33.8950   1
  -3  15   3 15.3836 24.7631   1
  -3  15   2 56.8505 30.2144   1
  -3  15   1 335.423 62.4920   1
  -3  15   0 421.050 83.6327   4
  -3  15   0 448.313 67.3995   1
  -3  15  -1 632.221 99.6741   4
  -3  15  -1 578.530 73.5820   1
  -3  15  -2 477.722 87.8153   4
  -3  15  -2 348.271 57.1567   1
  -3  15  -2 407.184 69.1202   2
  -3  15  -3 27.1486 21.7218   2
  -3  15  -3-2.21527 31.1344   4
  -3  15  -3 30.4209 25.1921   1
  -3  15  -4 37.8860 22.4782   1
  -3  15  -4 49.8007 27.8202   2
  -3  15  -4 57.6131 40.2241   4
  -3  15  -5 184.469 37.3788   1
  -3  15  -5 249.476 60.9344   4
  -3  15  -5 167.534 40.5635   2
  -3  15  -6 21.6294 15.8831   1
  -3  15  -6 59.1047 37.5619   4
  -3  15  -7 537.804 54.5111   1
  -3  15  -7 492.076 89.4993   4
  -3  15  -7 496.709 62.4474   2
  -3  15  -8-0.05705 10.1219   1
  -3  15  -8 14.1730 24.5392   4
  -3  15  -8 22.9298 16.0541   2
  -3  15  -9 61.0973 17.5442   1
  -3  15  -9 87.7775 41.7675   4
  -3  15  -9 44.8086 18.2939   2
  -3  15 -10-1.46496 8.72261   2
  -3  15 -10 0.36273 6.82186   1
  -3  15 -10-55.4244 37.2743   4
  -3  15 -11 158.478 56.0780   4
  -3  15 -12 467.115 92.9748   4
  -3  15 -13 472.878 92.1723   4
  -3  15 -14 16.9350 25.5117   4
  -3  15 -15 63.0508 33.4343   4
  -3  15 -16 46.5864 36.6244   4
  -3  15 -17 43.2834 36.2298   4
  -3  15 -18-5.81242 39.3612   4
  -3  15 -19 176.126 64.4422   4
  -3  15 -20-68.1182 40.6152   4
  -3  15 -21 98.6986 57.2375   4
  -3  15 -22 4.36321 22.8132   4
  -3  15 -23-56.2292 40.8134   4
  -3  14  10 10.9598 22.8415   1
  -3  14   9 84.0322 41.8962   1
  -3  14   8 128.100 48.7466   1
  -3  14   7 237.023 62.6664   1
  -3  14   6 66.0979 34.1784   1
  -3  14   5 135.980 45.1231   1
  -3  14   4 38.8584 25.5114   1
  -3  14   3 74.2836 42.7644   1
  -3  14   2 357.164 64.9284   1
  -3  14   1 1157.70 109.906   1
  -3  14   0 21.7735 22.6674   1
  -3  14   0 4.19157 20.6363   4
  -3  14  -1 608.319 73.6356   1
  -3  14  -1 563.611 81.9711   2
  -3  14  -1 657.334 96.1269   4
  -3  14  -2 84.9431 41.8278   4
  -3  14  -2 37.3427 26.8704   1
  -3  14  -2 61.8275 27.2878   2
  -3  14  -3 466.837 61.0490   1
  -3  14  -3 321.701 58.8656   2
  -3  14  -3 498.927 84.6705   4
  -3  14  -4 924.484 115.742   4
  -3  14  -4 788.086 84.6874   2
  -3  14  -4 910.321 78.9090   1
  -3  14  -5 383.176 74.3620   4
  -3  14  -5 404.087 49.5508   1
  -3  14  -6 263.702 38.6595   1
  -3  14  -6 281.017 64.3801   4
  -3  14  -6 274.094 47.2190   2
  -3  14  -7 1651.17 90.2231   1
  -3  14  -7 1441.08 99.3717   2
  -3  14  -7 1826.29 164.804   4
  -3  14  -8 12.3155 14.9947   2
  -3  14  -8-6.62951 10.9649   1
  -3  14  -8 27.6213 23.9777   4
  -3  14  -9-4.67438 12.8179   2
  -3  14  -9 3.59511 6.12477   1
  -3  14  -9 8.34763 25.0891   4
  -3  14 -10 176.023 17.3721   1
  -3  14 -10 172.210 20.2958   1
  -3  14 -10 150.252 17.5771   2
  -3  14 -10 178.976 56.8785   4
  -3  14 -11 230.154 62.9396   4
  -3  14 -12 132.874 53.3399   4
  -3  14 -13 657.863 105.966   4
  -3  14 -14 88.3442 48.4484   4
  -3  14 -15 24.7148 27.2843   4
  -3  14 -16 83.8504 38.8530   4
  -3  14 -17-23.9599 27.9639   4
  -3  14 -18-0.70184 29.9101   4
  -3  14 -19 39.4900 41.3951   4
  -3  14 -20 13.7252 31.9286   4
  -3  14 -21-314.803 103.342   4
  -3  14 -22-17.7254 27.9485   4
  -3  14 -23 48.7089 56.5954   4
  -3  13  11-9.33679 30.2022   1
  -3  13  10-57.7263 44.0348   1
  -3  13   9 40.4914 39.1880   1
  -3  13   8 46.6309 38.3147   1
  -3  13   7 25.7467 25.2649   1
  -3  13   6 26.8872 25.4227   1
  -3  13   6 37.1467 23.1391   5
  -3  13   5 25.1163 27.6747   1
  -3  13   5-27.8707 22.2435   5
  -3  13   4 23.7160 17.1041   5
  -3  13   4 11.0973 28.3942   1
  -3  13   3 12.1601 21.0157   1
  -3  13   3 72.2248 28.7874   5
  -3  13   2 145.273 46.1954   1
  -3  13   2 146.734 38.2142   5
  -3  13   1 65.0285 30.3609   1
  -3  13   1 43.4684 23.8250   5
  -3  13   0 664.450 88.9501   2
  -3  13   0 764.193 83.6883   1
  -3  13   0 653.441 93.6983   4
  -3  13   0 623.171 78.5096   5
  -3  13  -1-18.3865 17.9206   5
  -3  13  -1 4.76111 18.3215   1
  -3  13  -1 31.7497 23.4799   4
  -3  13  -1 8.28892 17.2181   2
  -3  13  -2 865.708 94.4781   2
  -3  13  -2 849.679 106.460   4
  -3  13  -2 905.668 83.7546   1
  -3  13  -3 217.339 40.9536   1
  -3  13  -3 165.017 49.3107   4
  -3  13  -3 182.892 42.5881   2
  -3  13  -4 381.546 49.7927   1
  -3  13  -4 392.070 74.3244   4
  -3  13  -5 1306.70 100.733   2
  -3  13  -5 1394.57 87.9048   1
  -3  13  -5 1440.47 137.226   4
  -3  13  -6 7.77551 9.40780   1
  -3  13  -6-4.08479 9.78618   2
  -3  13  -6 24.0371 36.3029   4
  -3  13  -7 303.173 36.1518   1
  -3  13  -7 246.698 38.2054   2
  -3  13  -7 290.270 65.0161   4
  -3  13  -8 172.306 53.9671   4
  -3  13  -8 108.817 20.9497   1
  -3  13  -8 90.7948 22.4336   2
  -3  13  -9 628.443 45.1743   2
  -3  13  -9 595.751 37.6109   1
  -3  13  -9 621.570 97.7337   4
  -3  13 -10 54.2179 33.3165   4
  -3  13 -11 270.775 61.9807   4
  -3  13 -12 111.790 45.2233   4
  -3  13 -13 133.166 47.1235   4
  -3  13 -14 383.674 76.7787   4
  -3  13 -15 12.4193 31.4149   4
  -3  13 -16 84.7370 38.5243   4
  -3  13 -17 117.059 40.4550   4
  -3  13 -18 128.056 50.0727   4
  -3  13 -19-15.7092 25.5220   4
  -3  13 -20 34.0891 41.8513   4
  -3  13 -21 46.9110 21.1636   4
  -3  13 -22-46.6175 37.5157   4
  -3  13 -23 0.94971 27.8509   4
  -3  12  12 24.0249 33.7860   1
  -3  12  11-9.67946 32.3004   1
  -3  12  10-47.6863 27.6018   1
  -3  12   9 176.872 55.3000   1
  -3  12   8 19.4582 26.2572   1
  -3  12   7-1.66489 29.0716   1
  -3  12   7 6.90047 14.1045   5
  -3  12   6 103.463 33.5731   5
  -3  12   6 20.3679 26.0657   1
  -3  12   5 124.483 32.0538   5
  -3  12   5 189.194 51.2254   1
  -3  12   4 50.1146 21.6271   5
  -3  12   4 65.8228 30.6006   1
  -3  12   3 309.360 59.8281   1
  -3  12   3 217.328 46.6702   5
  -3  12   2 260.199 53.2409   1
  -3  12   2 222.821 47.1257   5
  -3  12   1 258.710 53.7084   2
  -3  12   1 198.532 43.9234   5
  -3  12   1 240.996 59.7367   4
  -3  12   0 2212.41 157.613   2
  -3  12   0 2376.63 151.000   5
  -3  12   0 2317.91 167.811   4
  -3  12  -1 405.740 63.5874   5
  -3  12  -1 455.820 74.1035   4
  -3  12  -1 485.518 71.2362   2
  -3  12  -2 417.165 63.5814   5
  -3  12  -2 402.634 72.2635   4
  -3  12  -2 394.056 63.1809   2
  -3  12  -3 1.70301 12.0497   1
  -3  12  -3 8.27953 10.5830   5
  -3  12  -3 15.5098 24.2663   4
  -3  12  -4 6.04842 21.6936   5
  -3  12  -4 31.7354 17.3624   1
  -3  12  -4 2.43055 21.5536   4
  -3  12  -4 20.6305 16.0181   2
  -3  12  -5 14.4674 13.8833   1
  -3  12  -5 15.7730 14.0150   2
  -3  12  -5 34.1276 21.5951   5
  -3  12  -5 17.3991 21.9964   4
  -3  12  -6 703.116 65.4450   2
  -3  12  -6 732.545 84.7059   5
  -3  12  -6 730.922 98.7144   4
  -3  12  -6 838.861 60.7840   1
  -3  12  -7 309.235 32.9424   1
  -3  12  -7 267.020 60.3072   4
  -3  12  -7 248.840 36.2322   2
  -3  12  -8 72.7102 17.6212   2
  -3  12  -8 95.2018 15.8175   1
  -3  12  -8 83.2086 40.6673   4
  -3  12  -9 269.359 63.2123   4
  -3  12  -9 319.710 28.8861   1
  -3  12  -9 275.118 21.6565   1
  -3  12 -10 114.303 32.8852   4
  -3  12 -11 36.2447 30.5298   4
  -3  12 -12 3.74470 28.2640   4
  -3  12 -13 86.9582 40.4752   4
  -3  12 -14 510.688 90.7988   4
  -3  12 -15 11.0792 31.6159   4
  -3  12 -16 27.9977 22.5695   4
  -3  12 -17 284.444 72.4219   4
  -3  12 -18 383.401 84.3251   4
  -3  12 -19-71.1991 39.4679   4
  -3  12 -20-23.8573 28.1085   4
  -3  12 -21 17.1572 26.0608   4
  -3  12 -22 26.6103 33.9225   4
  -3  12 -23 16.7792 20.2864   4
  -3  11  13 15.3439 27.8248   1
  -3  11  12 91.0524 47.0185   1
  -3  11  11 42.3480 34.8330   1
  -3  11  10 110.445 47.2904   1
  -3  11   9 16.8785 28.9317   1
   3 -11  -8 9.55393 21.1912   2
  -3  11   8 26.7126 19.2437   5
  -3  11   8-17.7391 26.6506   1
  -3  11   7 10.8648 23.2835   1
   3 -11  -7-2.69060 23.2849   2
  -3  11   7-8.99945 13.4862   5
   3 -11  -6 179.770 48.0359   2
  -3  11   6 102.762 32.7789   5
  -3  11   6 145.760 37.6099   1
   3 -11  -5 14.4303 17.9832   2
  -3  11   5-23.2036 18.5017   5
   3 -11  -4 210.578 49.5692   2
  -3  11   4 252.523 49.3360   5
   3 -11  -3 3.08599 15.2488   2
  -3  11   3 7.33186 13.6950   5
   3 -11  -2 288.496 52.1348   2
  -3  11   2 275.863 50.9131   5
  -3  11   2 260.294 58.0029   2
  -3  11   1 65.3187 26.3391   5
  -3  11   1 32.1063 27.7282   2
   3 -11  -1 81.3675 28.3959   2
  -3  11   1 35.4367 25.0599   4
  -3  11   0 87.1588 33.3357   2
   3 -11   0 63.9523 24.6864   2
  -3  11   0 91.4418 32.1088   5
  -3  11   0 128.690 38.9601   4
  -3  11  -1 905.948 102.745   4
   3 -11   1 881.740 78.7947   2
  -3  11  -1 838.998 88.4012   2
  -3  11  -1 904.443 92.1785   5
  -3  11  -2 362.915 68.0992   4
  -3  11  -2 370.137 59.8665   5
   3 -11   2 381.686 49.9967   2
   3 -11   3 762.409 67.0416   2
  -3  11  -3 742.026 76.2021   2
  -3  11  -3 767.725 84.9395   5
  -3  11  -3 820.200 99.5133   4
  -3  11  -4 816.721 76.0165   2
  -3  11  -4 808.381 87.2486   5
  -3  11  -4 763.526 95.6187   4
  -3  11  -5 337.910 66.8818   4
  -3  11  -5 290.925 53.7456   5
  -3  11  -5 262.107 41.1173   2
  -3  11  -6 520.552 69.8416   5
  -3  11  -6 474.265 51.0435   2
  -3  11  -6 481.575 79.2776   4
  -3  11  -7 874.787 90.4549   5
  -3  11  -7 743.263 57.3272   2
  -3  11  -7 850.131 51.4849   1
  -3  11  -7 815.254 105.164   4
  -3  11  -8 293.465 64.3290   4
  -3  11  -8 272.825 24.3768   1
  -3  11  -8 277.269 28.9334   2
  -3  11  -8 301.928 55.1679   5
  -3  11  -9 6.86316 4.54582   1
  -3  11  -9 24.0234 17.3347   5
  -3  11  -9 16.9738 24.2383   4
  -3  11  -9-3.17048 4.62180   1
  -3  11 -10 443.612 78.9282   4
   3 -11  11 333.957 61.9909   4
  -3  11 -11 351.787 74.4308   4
  -3  11 -12 827.114 111.555   4
  -3  11 -13 0.73891 22.1601   4
  -3  11 -14 595.586 94.9496   4
  -3  11 -15 35.4610 33.6638   4
  -3  11 -16 33.4993 33.1133   4
  -3  11 -17 144.969 53.4380   4
  -3  11 -18 124.967 47.6037   4
  -3  11 -19-6.77144 20.4507   4
  -3  11 -20 66.8574 44.3778   4
  -3  11 -21 124.789 53.0586   4
  -3  11 -22 57.1484 39.5035   4
  -3  10  14 73.8123 45.1586   1
  -3  10  13-29.8905 23.0173   1
  -3  10  12-31.0704 33.1553   1
  -3  10  11 4.34044 23.3386   1
  -3  10  10 38.1133 34.5799   1
   3 -10 -10 47.3261 34.8109   2
  -3  10   9 37.7882 33.9470   1
   3 -10  -9 41.9117 32.9949   2
  -3  10   9 44.1270 24.8707   5
   3 -10  -8 10.7683 24.4588   2
  -3  10   8 15.7439 13.1500   5
   3 -10  -7 467.205 74.6048   2
  -3  10   7 318.241 53.5429   5
   3 -10  -6 943.428 101.571   2
  -3  10   6 781.196 85.5231   5
  -3  10   5 154.144 40.3041   5
   3 -10  -5 177.482 42.2743   2
   3 -10  -4 60.0647 28.9017   2
  -3  10   4 50.2736 24.0638   5
  -3  10   3 1913.05 133.633   5
  -3  10   3 1996.94 154.647   2
   3 -10  -3 1813.83 126.343   2
  -3  10   2 413.961 69.2301   2
   3 -10  -2 404.764 57.4018   2
  -3  10   2 348.140 56.5054   5
  -3  10   2 445.062 69.3568   4
  -3  10   1 69.1164 26.6258   4
   3 -10  -1 72.2508 23.3213   2
  -3  10   1 59.6906 23.0779   5
  -3  10   1 5.06729 17.4761   2
  -3  10   0 673.700 77.8592   5
   3 -10   0 616.705 65.0485   2
  -3  10   0 690.332 82.7473   2
  -3  10   0 768.445 90.2329   4
  -3  10  -1-14.4715 17.4577   5
   3 -10   1 12.8062 14.5479   2
  -3  10  -1 18.8243 25.8016   4
  -3  10  -2 251.758 54.7824   4
  -3  10  -2 177.488 38.1279   2
   3 -10   2 215.355 34.5267   2
  -3  10  -2 236.885 47.1677   5
   3 -10   3 615.396 56.5645   2
  -3  10  -3 600.518 74.1201   5
  -3  10  -3 534.696 62.7785   2
   3 -10   4 2397.56 102.466   2
  -3  10  -4 2440.98 126.387   2
  -3  10  -4 2528.51 150.978   5
   3 -10   5 20.0605 10.9226   2
  -3  10  -5 31.4278 22.8081   5
  -3  10  -5 19.5153 10.9941   2
  -3  10  -6-3.38416 8.13196   2
  -3  10  -6 14.3816 15.1074   5
  -3  10  -6-7.24843 25.0077   4
  -3  10  -7 600.350 72.4663   5
  -3  10  -7 540.907 44.5097   2
  -3  10  -7 605.784 86.7818   4
  -3  10  -8 363.940 56.8264   5
  -3  10  -8 343.005 31.6891   1
   3 -10   8 372.233 62.0665   4
  -3  10  -8 230.085 55.0746   4
  -3  10  -9 42.1817 31.0095   4
  -3  10  -9 27.2894 11.6909   5
   3 -10   9 36.3580 23.1295   4
  -3  10 -10 489.517 66.4395   5
   3 -10  10 611.384 82.7964   4
  -3  10 -10 475.882 79.8482   4
  -3  10 -11 388.286 59.6574   5
   3 -10  11 447.918 71.2842   4
  -3  10 -11 297.105 66.4374   4
  -3  10 -12 418.085 62.6435   5
   3 -10  12 493.958 78.1535   4
  -3  10 -12 429.001 78.9941   4
  -3  10 -13 3.36283 29.5581   4
  -3  10 -14 129.275 46.2395   4
  -3  10 -15 17.8161 24.6560   4
  -3  10 -16 377.605 78.8271   4
  -3  10 -17 46.3879 32.2239   4
  -3  10 -18 29.8931 29.1332   4
  -3  10 -19-11.0354 23.3454   4
  -3  10 -20 9.54642 18.2684   4
  -3  10 -21-4.44075 19.5537   4
   3 -10  22 10.2919 26.4175   3
  -3   9  15 53.4350 36.9879   1
  -3   9  14-2.32033 24.7888   1
   3  -9 -13 52.4609 39.3704   2
  -3   9  13 43.0329 36.9295   1
  -3   9  12 9.08159 23.4587   1
   3  -9 -12 73.4529 40.0666   2
  -3   9  11 232.191 64.4138   1
   3  -9 -11 132.579 46.0626   2
   3  -9 -10 157.765 45.2478   2
  -3   9  10 186.816 41.7507   5
   3  -9  -9 319.883 63.8221   2
  -3   9   9 315.801 65.3292   5
   3  -9  -8 98.4386 37.6190   2
   3  -9  -7 373.142 66.8012   2
   3  -9  -6 46.9992 30.2376   2
   3  -9  -5 172.706 42.1258   2
  -3   9   5 194.197 50.5718   2
   3  -9  -4 18.2843 23.6278   2
  -3   9   4-22.9264 20.9801   2
   3  -9  -3 240.614 47.1154   2
  -3   9   3 219.201 50.3829   2
   3  -9  -2 840.421 78.7215   2
  -3   9   2 826.285 94.2185   2
  -3   9   2 842.447 90.0611   4
  -3   9   2 751.270 82.5230   5
   3  -9  -1 137.686 32.6899   2
  -3   9   1 146.599 36.5251   5
  -3   9   1 167.842 41.8683   4
  -3   9   1 135.577 38.9078   2
  -3   9   0 915.115 95.0128   4
   3  -9   0 796.183 70.3356   2
  -3   9   0 852.931 88.5235   5
  -3   9  -1 459.821 70.1988   4
   3  -9   1 474.276 53.1505   2
  -3   9  -1 561.128 73.1089   5
  -3   9  -1 447.257 59.7434   2
   3  -9   2 83.3875 21.0611   2
  -3   9  -2 145.784 38.0071   5
  -3   9  -2 118.350 31.3393   2
   3  -9   3 338.299 414.737   2
  -3   9  -3 353.031 527.327   2
  -3   9  -3 326.754 565.086   5
   3  -9   4 1610.20 78.5174   2
  -3   9  -4 1508.31 94.8972   2
  -3   9  -4 1718.81 122.934   5
   3  -9   5 900.789 54.3085   2
  -3   9  -5 891.787 88.0905   5
  -3   9  -5 820.433 65.7992   2
   3  -9   6 954.147 50.1058   2
  -3   9  -6 917.558 89.1184   5
   3  -9   6 893.439 92.5001   4
  -3   9  -6 1060.04 67.9743   2
  -3   9  -7 3937.59 121.834   1
  -3   9  -7 4169.36 187.478   5
   3  -9   7 3870.86 194.648   4
  -3   9  -7 3856.83 213.608   4
   3  -9   8 214.117 50.4716   4
  -3   9  -8 191.934 22.2945   1
  -3   9  -8 213.540 45.0253   5
  -3   9  -8 217.627 54.3004   4
  -3   9  -9 60.4805 22.7827   5
   3  -9   9 69.5755 31.8357   4
  -3   9  -9 98.9213 38.8497   4
  -3   9 -10-48.2811 34.6446   4
  -3   9 -10-4.16240 10.3338   5
   3  -9  10-18.0743 16.8883   4
  -3   9 -11 613.128 72.9157   5
   3  -9  11 595.117 83.1633   4
  -3   9 -11 633.944 92.4631   4
  -3   9 -12 204.653 43.1168   5
   3  -9  12 231.474 53.7647   4
  -3   9 -12 182.323 50.9675   4
   3  -9  13 12.8075 17.0024   4
  -3   9 -13-4.44677 11.2162   5
  -3   9 -13 0.34329 27.3372   4
  -3   9 -14 619.759 95.7761   4
  -3   9 -14 503.860 68.2007   5
  -3   9 -15 38.2882 36.4201   4
  -3   9 -16 1.85820 22.3303   4
  -3   9 -17-27.1876 29.8712   4
  -3   9 -18-5.82853 17.6281   4
  -3   9 -19 128.600 46.7607   4
  -3   9 -20 101.649 46.9913   4
   3  -9  21 1.07335 34.0504   3
   3  -9  22-83.0690 56.1926   3
  -3   8  16 3.78527 28.1290   1
   3  -8 -15 47.7038 33.0093   2
  -3   8  15-7.82211 20.2770   1
   3  -8 -14-3.86065 20.9120   2
  -3   8  14 4.21493 29.6500   1
   3  -8 -13-9.82026 22.6297   2
  -3   8  13 13.8628 18.6625   1
   3  -8 -12 18.6466 35.1694   2
   3  -8 -11 63.7205 35.6207   2
   3  -8 -10 97.0295 34.6055   2
   3  -8  -9 729.507 91.6264   2
   3  -8  -8 41.0818 29.5116   2
   3  -8  -7 1237.88 113.136   2
   3  -8  -6 73.5199 28.9590   2
  -3   8   6 117.544 42.5225   2
   3  -8  -5 123.692 35.3518   2
  -3   8   5 138.807 43.7522   2
   3  -8  -4 1071.02 94.3920   2
  -3   8   4 919.444 103.334   2
  -3   8   3 292.644 57.9903   2
   3  -8  -3 245.460 44.2097   2
  -3   8   3 313.424 55.7828   4
  -3   8   2 607.088 73.9722   4
   3  -8  -2 502.590 60.6552   2
  -3   8   2 572.628 76.2529   2
   3  -8  -1 159.913 35.9740   2
  -3   8   1 140.180 37.6935   4
  -3   8   0 439.275 64.7105   4
   3  -8   0 399.507 49.4197   2
  -3   8   0 312.735 54.1316   2
   3  -8   1 284.258 39.9469   2
  -3   8  -1 205.782 42.9189   5
  -3   8  -1 220.186 41.8728   2
   3  -8   2 2208.76 103.013   2
  -3   8  -2 2388.53 128.137   2
  -3   8  -2 2349.91 144.319   5
   3  -8   3 31.2162 13.2606   2
  -3   8  -3 35.7771 19.8167   5
  -3   8  -3 55.0864 18.1131   2
   3  -8   4 2082.31 86.8902   2
  -3   8  -4 2164.58 137.162   5
  -3   8  -4 1920.81 101.489   2
  -3   8  -5 4.94127 10.5634   2
   3  -8   5 15.8273 10.4240   2
  -3   8  -5-0.81240 16.7341   5
   3  -8   5 15.2131 20.0974   4
  -3   8  -6 838.414 60.6454   1
   3  -8   6 841.773 43.7231   2
  -3   8  -6 850.341 83.7388   5
   3  -8   6 870.813 90.6288   4
   3  -8   7 706.652 31.1818   2
  -3   8  -7 591.459 44.3470   1
  -3   8  -7 744.714 77.8083   5
   3  -8   7 734.985 84.0156   4
  -3   8  -8 40.2956 10.3183   1
  -3   8  -8 63.8539 24.7308   5
   3  -8   8 86.0511 36.3193   4
  -3   8  -8 37.5678 25.4048   4
  -3   8  -9 739.170 75.8605   5
  -3   8  -9 698.103 29.3356   1
   3  -8   9 638.647 81.6438   4
  -3   8  -9 740.146 95.5497   4
  -3   8 -10 29.7113 24.3932   4
  -3   8 -10 50.4192 22.2689   5
   3  -8  10 14.4589 16.6864   4
   3  -8  11 14.0221 16.8600   4
  -3   8 -11-4.05495 15.0319   5
  -3   8 -11-15.5059 24.9501   4
  -3   8 -12 1023.62 90.5289   5
   3  -8  12 1040.31 110.172   4
  -3   8 -12 941.037 111.038   4
  -3   8 -13-29.9474 33.6543   4
   3  -8  13-0.61381 25.7333   4
  -3   8 -13-0.71001 10.0856   5
  -3   8 -14 21.6426 22.2889   4
  -3   8 -14 10.9449 15.0195   5
   3  -8  14 60.0460 28.6375   4
  -3   8 -15 29.1662 13.3801   5
  -3   8 -15 63.0643 40.0725   4
  -3   8 -16 1.08240 28.3669   4
   3  -8  16 3.32850 10.9440   1
   3  -8  17-0.66172 10.3058   1
  -3   8 -17-28.9902 35.8574   4
  -3   8 -18-78.8945 38.2749   4
  -3   8 -19-16.0981 21.7769   4
   3  -8  20 46.7028 51.5375   3
   3  -8  21-42.1182 46.0219   3
   3  -8  22-0.74729 44.2588   3
  -3   7  17 34.6324 29.0535   1
   3  -7 -16-62.5710 35.1262   2
  -3   7  16 19.1115 34.0844   1
   3  -7 -15 71.2623 44.5043   2
  -3   7  15-32.1749 40.0519   1
   3  -7 -14-13.7222 25.9551   2
  -3   7  14 52.7029 36.3136   1
   3  -7 -13 99.9143 42.1634   2
   3  -7 -12-29.4835 27.5289   2
   3  -7 -11 151.970 45.1595   2
   3  -7 -10 42.5919 30.8420   2
   3  -7  -9 171.481 47.5754   2
   3  -7  -8 801.859 92.6078   2
   3  -7  -7 132.786 42.0457   2
   3  -7  -6 1047.01 98.0690   2
  -3   7   6 1099.28 116.867   2
   3  -7  -5 2131.63 134.833   2
  -3   7   5 2092.59 155.804   2
   3  -7  -4 104.483 31.6868   2
  -3   7   4 186.581 40.5847   4
  -3   7   4 123.050 39.4624   2
  -3   7   3 313.103 52.1940   4
   3  -7  -3 328.541 48.1874   2
  -3   7   3 290.402 55.1539   2
   3  -7  -2 371.798 50.5104   2
  -3   7   2 298.768 49.4660   4
   3  -7  -1 453.449 52.9444   2
  -3   7   1 477.575 64.6486   2
  -3   7   1 453.493 64.2827   4
  -3   7   0 94.8747 29.1471   2
   3  -7   0 112.398 25.7290   2
  -3   7   0 96.6905 33.0798   4
   3  -7   1 177.823 31.5132   2
  -3   7  -1 144.669 31.0591   2
  -3   7  -2 719.389 68.6483   2
   3  -7   2 751.297 60.4680   2
  -3   7  -3 302.940 41.1922   2
   3  -7   3 305.766 34.6821   2
  -3   7  -3 375.948 57.4861   5
   3  -7   3 373.585 53.8587   4
   3  -7   4 1603.41 74.0514   2
  -3   7  -4 1816.18 122.884   5
  -3   7  -4 1660.66 92.2824   2
   3  -7   4 1788.79 123.068   4
  -3   7  -5 1101.62 72.2048   1
   3  -7   5 1061.45 55.2806   2
  -3   7  -5 1149.46 96.2198   5
   3  -7   5 1168.48 102.010   4
  -3   7  -5 1093.33 69.5897   2
  -3   7  -6 1428.76 74.5244   1
   3  -7   6 1421.00 55.5596   2
  -3   7  -6 1597.20 112.039   5
   3  -7   6 1474.74 116.091   4
   3  -7   7 712.337 83.2032   4
   3  -7   7 698.187 32.3245   2
  -3   7  -7 657.151 47.0427   1
  -3   7  -7 686.279 73.1090   5
   3  -7   8 17.7947 19.2994   4
  -3   7  -8 76.6496 28.1178   5
  -3   7  -8 39.7580 10.9846   1
  -3   7  -8-2.70330 18.8455   4
  -3   7  -9 15.4363 6.62743   1
  -3   7  -9 27.7784 18.9210   5
   3  -7   9 17.7648 17.1826   4
  -3   7  -9-7.68482 24.5301   4
  -3   7 -10 1688.75 54.3467   1
  -3   7 -10 1743.60 113.417   5
   3  -7  10 1674.11 136.794   4
  -3   7 -10 1579.32 137.637   4
  -3   7 -11 65.4403 31.4103   4
  -3   7 -11 42.3754 21.8684   5
   3  -7  11 49.0850 20.9867   4
  -3   7 -12 2776.96 145.412   5
   3  -7  12 2817.43 184.336   4
  -3   7 -12 2482.67 177.681   4
   3  -7  13 21.7218 16.6396   4
   3  -7  13 43.6308 17.2084   1
  -3   7 -13-7.23969 22.9044   4
  -3   7 -13 30.3900 18.9195   5
   3  -7  13 8.92637 4.41976   2
  -3   7 -14 303.902 65.0353   4
   3  -7  14 309.330 37.5199   1
   3  -7  14 280.331 27.2439   2
  -3   7 -14 345.807 51.7963   5
   3  -7  14 239.765 58.6511   4
  -3   7 -15-0.85539 19.0117   4
  -3   7 -15 19.3739 11.6090   5
   3  -7  15 28.5760 14.8101   1
   3  -7  15 22.0200 8.64470   2
  -3   7 -16 326.991 68.6148   4
   3  -7  16 437.493 46.3385   1
   3  -7  16 353.268 39.1744   2
  -3   7 -17-11.3707 24.2033   4
   3  -7  17 16.8299 14.0450   1
  -3   7 -18 97.3462 44.2093   4
   3  -7  18 246.518 82.5557   3
   3  -7  18 76.2686 25.0496   1
   3  -7  19 234.645 80.2994   3
   3  -7  20 41.0169 33.1993   3
   3  -7  21-117.231 64.4342   3
   3  -7  22-100.554 63.4211   3
   3  -6 -18 181.577 55.7427   2
  -3   6  18 38.5034 32.6278   1
   3  -6 -17 83.4417 40.0911   2
  -3   6  17 107.909 50.1344   1
  -3   6  16 14.3468 21.5187   1
   3  -6 -16 11.7236 19.8628   2
   3  -6 -15 30.5656 21.2745   2
   3  -6 -14 320.547 67.8453   2
   3  -6 -13 169.298 50.6227   2
   3  -6 -12-11.8884 24.5941   2
   3  -6 -11 15.4067 23.3014   3
   3  -6 -11 92.6275 40.1090   2
   3  -6 -10 476.337 81.5773   3
   3  -6 -10 520.181 78.4969   2
   3  -6  -9 370.679 63.1366   2
   3  -6  -8 137.953 35.3637   2
   3  -6  -7 45.9004 23.9501   2
  -3   6   7 72.4624 41.3982   2
   3  -6  -6 225.603 47.4503   2
  -3   6   6 228.414 54.3515   2
   3  -6  -5 970.453 89.1954   2
  -3   6   5 1021.98 107.513   2
  -3   6   5 1119.27 92.0255   4
  -3   6   4 51.0883 25.2834   4
  -3   6   4 32.9858 24.7384   2
   3  -6  -4 74.0625 28.7452   2
  -3   6   3 21.3565 20.3696   4
   3  -6  -3 44.3510 26.9586   2
  -3   6   2 2020.32 123.506   4
   3  -6  -2 1911.16 111.499   2
   3  -6  -1 2506.08 122.849   2
  -3   6   1 2432.51 139.799   2
  -3   6   1 2569.75 142.080   4
  -3   6   0 1544.72 111.120   4
   3  -6   0 1393.72 87.7197   2
  -3   6   0 1333.26 99.5625   2
   3  -6   1 294.817 40.1385   2
  -3   6  -1 342.266 51.2396   2
  -3   6  -2 30.4207 16.7372   2
   3  -6   2 43.5940 16.7705   2
   3  -6   2 26.4635 19.6876   4
   3  -6   3 446.155 46.6171   2
  -3   6  -3 410.732 50.6007   2
   3  -6   3 365.629 57.9627   4
   3  -6   4 131.465 34.9287   4
  -3   6  -4 105.203 24.7784   2
   3  -6   4 69.4660 15.1692   2
  -3   6  -5 755.634 58.6823   1
   3  -6   5 839.658 51.0771   2
  -3   6  -5 866.094 82.7210   5
   3  -6   5 768.511 81.9049   4
   3  -6   6 366.789 60.9672   4
  -3   6  -6 412.836 59.2290   5
  -3   6  -6 455.145 45.6595   1
   3  -6   6 509.968 39.9699   2
  -3   6  -7 36.3445 13.4356   1
  -3   6  -7 58.6392 23.4892   5
   3  -6   7 19.6558 14.4650   4
   3  -6   7 50.8596 13.0662   2
  -3   6  -8 708.590 71.1090   5
   3  -6   8 693.372 40.4270   2
  -3   6  -8 657.344 41.6924   1
   3  -6   8 677.478 80.4903   4
  -3   6  -8 707.529 86.8740   4
   3  -6   9 958.037 36.7048   2
  -3   6  -9 1003.00 84.5950   5
   3  -6   9 993.165 50.0702   2
  -3   6  -9 970.777 105.752   4
   3  -6   9 1110.44 108.508   4
  -3   6  -9 995.901 49.7068   1
   3  -6  10 878.021 50.3865   2
  -3   6 -10 947.850 106.876   4
   3  -6  10 899.966 60.8899   1
   3  -6  10 806.052 36.7182   2
   3  -6  10 822.359 95.5428   4
  -3   6 -10 748.846 44.2595   1
  -3   6 -10 865.015 77.7515   5
  -3   6 -11 14.6135 23.6582   4
   3  -6  11 70.6932 19.8159   1
   3  -6  11 22.9079 8.85893   2
  -3   6 -11 10.6793 12.1007   5
   3  -6  11 11.9761 15.7374   4
  -3   6 -12 389.254 69.7821   4
   3  -6  12 373.057 42.9178   1
   3  -6  12 393.899 32.2957   2
  -3   6 -12 371.864 51.6048   5
   3  -6  12 438.912 72.7330   4
   3  -6  13 172.543 52.5434   4
  -3   6 -13 196.406 51.5211   4
  -3   6 -13 191.037 37.5979   5
   3  -6  13 156.672 29.8299   1
   3  -6  13 156.916 23.3434   2
   3  -6  14 943.369 112.090   4
   3  -6  14 810.847 68.8542   1
   3  -6  14 784.960 56.9834   2
  -3   6 -14 764.248 74.0033   5
  -3   6 -14 785.217 102.420   4
   3  -6  15 41.7763 22.1356   1
  -3   6 -15 79.4681 37.2857   4
   3  -6  15 49.6394 16.8962   2
   3  -6  16 111.941 29.7882   1
  -3   6 -16 113.403 42.4962   4
   3  -6  16 187.450 32.9899   2
   3  -6  17 0.96557 10.6904   1
  -3   6 -17-23.5179 27.5090   4
   3  -6  17-14.0732 46.0556   3
   3  -6  18 43.6406 26.0438   1
   3  -6  18 14.5884 38.7413   3
   3  -6  19 67.1938 37.7020   3
   3  -6  20 37.8062 32.9950   3
   3  -6  21 21.6506 47.6229   3
   3  -6  22 3.75694 37.6412   3
  -3   5  19-7.64536 36.4613   1
   3  -5 -19-44.7158 34.8721   2
   3  -5 -18 18.7573 35.8670   2
  -3   5  18-25.2395 37.9587   1
   3  -5 -17 126.247 50.1883   2
  -3   5  17 123.436 49.6430   1
   3  -5 -16-34.1644 33.5357   2
   3  -5 -15-7.37013 21.4842   2
   3  -5 -14 195.506 58.6648   2
   3  -5 -13 19.5678 22.1316   2
   3  -5 -12-7.21238 21.5364   3
   3  -5 -12-18.1853 26.7970   2
   3  -5 -11 79.0770 38.5198   3
   3  -5 -11-4.04544 16.1387   2
   3  -5 -10-20.1099 23.3930   3
   3  -5 -10 36.9457 24.1848   2
   3  -5  -9 64.8291 31.1921   2
   3  -5  -9 127.686 41.7875   3
   3  -5  -8 226.286 46.9048   2
  -3   5   8 254.308 57.0558   2
   3  -5  -7-4.71762 24.7329   2
  -3   5   7-13.6326 20.1133   2
   3  -5  -6 925.420 88.9778   2
  -3   5   6 855.409 76.3194   4
   3  -5  -5 660.236 73.1444   2
  -3   5   5 628.166 66.5626   4
   3  -5  -4 15.6699 17.1389   2
  -3   5   4 9.68203 12.1904   4
   3  -5  -3 25.0764 20.8226   2
  -3   5   3 13.9372 16.0938   4
   3  -5  -2 2180.74 118.880   2
  -3   5   2 2296.88 139.518   2
  -3   5   2 2288.49 127.424   4
  -3   5   1 2907.53 144.738   4
   3  -5  -1 2595.60 126.090   2
  -3   5   1 2781.20 145.147   2
  -3   5   0 248.937 48.7731   4
   3  -5   0 258.457 42.4122   4
   3  -5   0 214.465 37.7183   2
  -3   5   0 228.585 43.9556   2
   3  -5   1 2221.91 107.090   2
   3  -5   1 2137.60 121.495   4
  -3   5  -1 2157.09 118.163   2
   3  -5   2 1912.43 95.3218   2
  -3   5  -2 1925.75 107.494   2
   3  -5   2 1869.15 116.429   4
[truncated: 410,767 more chars]
