# Supplementary material for: Synthesis and Structural Characterization of Isostructural 4-(4-Aryl)-2-(5-(4-fluorophenyl)-3-(1-(4-fluorophenyl)-5-methyl-1H-1,2,3-triazol-4-yl)-4,5-dihydro-1H-pyrazol-1-yl)thiazoles
Source: MDPI journal article supplement (doi:10.3390/cryst11070795), 2021-07-08
Supplement: s1 [file s1 › CIf of 5 - bmk1777e.cif]

 
data_bmk1777e
 
_audit_creation_method            'SHELXL-2018/1'
_shelx_SHELXL_version_number      '2018/1'
_chemical_name_systematic         ?
_chemical_name_common             ?
_chemical_melting_point           ?
_chemical_formula_moiety          ?
_chemical_formula_sum
 'C54 H38 Br2 F4 N12 S2' 
_chemical_formula_weight          1154.90

loop_
 _atom_type_symbol
 _atom_type_description
 _atom_type_scat_dispersion_real
 _atom_type_scat_dispersion_imag
 _atom_type_scat_source
 'C'  'C'   0.0033   0.0016
 'International Tables Vol C Tables 4.2.6.8 and 6.1.1.4'
 'H'  'H'   0.0000   0.0000
 'International Tables Vol C Tables 4.2.6.8 and 6.1.1.4'
 'N'  'N'   0.0061   0.0033
 'International Tables Vol C Tables 4.2.6.8 and 6.1.1.4'
 'F'  'F'   0.0171   0.0103
 'International Tables Vol C Tables 4.2.6.8 and 6.1.1.4'
 'S'  'S'   0.1246   0.1234
 'International Tables Vol C Tables 4.2.6.8 and 6.1.1.4'
 'Br'  'Br'  -0.2901   2.4595
 'International Tables Vol C Tables 4.2.6.8 and 6.1.1.4'
 
_space_group_crystal_system       triclinic
_space_group_IT_number            2
_space_group_name_H-M_alt         'P -1'
_space_group_name_Hall            '-P 1'
 
_shelx_space_group_comment
;
The symmetry employed for this shelxl refinement is uniquely defined
by the following loop, which should always be used as a source of
symmetry information in preference to the above space-group names.
They are only intended as comments.
;
 
loop_
 _space_group_symop_operation_xyz
 'x, y, z'
 '-x, -y, -z'
 
_cell_length_a                    7.7607(3)
_cell_length_b                    18.2950(11)
_cell_length_c                    19.5252(14)
_cell_angle_alpha                 115.910(6)
_cell_angle_beta                  96.971(4)
_cell_angle_gamma                 92.567(4)
_cell_volume                      2460.2(3)
_cell_formula_units_Z             2
_cell_measurement_temperature     293(2)
_cell_measurement_reflns_used   5570
_cell_measurement_theta_min     3.3490
_cell_measurement_theta_max     25.4350
 
_exptl_crystal_description        needle
_exptl_crystal_colour             colourless
_exptl_crystal_density_meas       ?
_exptl_crystal_density_method     ?
_exptl_crystal_density_diffrn     1.559          
_exptl_crystal_F_000              1168
_exptl_transmission_factor_min    ?
_exptl_transmission_factor_max    ?
_exptl_crystal_size_max           0.623
_exptl_crystal_size_mid           0.148
_exptl_crystal_size_min           0.118
_exptl_absorpt_coefficient_mu     1.801
_shelx_estimated_absorpt_T_min    0.400
_shelx_estimated_absorpt_T_max    0.816
_exptl_absorpt_correction_T_min                     0.993
_exptl_absorpt_correction_T_max                     0.997
_exptl_absorpt_correction_type            gaussian
_exptl_absorpt_process_details
;
CrysAlisPro 1.171.38.41 (Rigaku Oxford Diffraction, 2015)
Numerical absorption correction based on gaussian integration over
			a multifaceted crystal model
Empirical absorption correction using spherical harmonics,
 implemented in SCALE3 ABSPACK scaling algorithm.
;
_diffrn_ambient_temperature       293(2)
_diffrn_radiation_wavelength      0.71073
_diffrn_radiation_type            MoK\a
_diffrn_source                    ?
_diffrn_measurement_device_type 'SuperNova, Dual, Cu at zero, Atlas'
_diffrn_measurement_method '\w scans'
_diffrn_detector_area_resol_mean  ?
_diffrn_reflns_number             23703
_diffrn_reflns_av_unetI/netI      0.0785
_diffrn_reflns_av_R_equivalents   0.0448
_diffrn_reflns_limit_h_min        -10
_diffrn_reflns_limit_h_max        10
_diffrn_reflns_limit_k_min        -25
_diffrn_reflns_limit_k_max        25
_diffrn_reflns_limit_l_min        -20
_diffrn_reflns_limit_l_max        25
_diffrn_reflns_theta_min          2.057
_diffrn_reflns_theta_max          29.782
_diffrn_reflns_theta_full         25.242
_diffrn_measured_fraction_theta_max   0.825
_diffrn_measured_fraction_theta_full  1.000
_diffrn_reflns_Laue_measured_fraction_max    0.825
_diffrn_reflns_Laue_measured_fraction_full   1.000
_diffrn_reflns_point_group_measured_fraction_max   0.825
_diffrn_reflns_point_group_measured_fraction_full  1.000
_reflns_number_total              11617
_reflns_number_gt                 5906
_reflns_threshold_expression      'I > 2\s(I)'
_reflns_Friedel_coverage          0.000
_reflns_Friedel_fraction_max      .
_reflns_Friedel_fraction_full     .
 
_reflns_special_details
;
 Reflections were merged by SHELXL according to the crystal
 class for the calculation of statistics and refinement.
 
 _reflns_Friedel_fraction is defined as the number of unique
 Friedel pairs measured divided by the number that would be
 possible theoretically, ignoring centric projections and
 systematic absences.
;
 
_computing_data_collection     'CrysAlisPro 1.171.38.41 (Rigaku OD, 2015)'
_computing_cell_refinement     'CrysAlisPro 1.171.38.41 (Rigaku OD, 2015)'
_computing_data_reduction      'CrysAlisPro 1.171.38.41 (Rigaku OD, 2015)'
_computing_structure_solution   'SHELXS'
_computing_structure_refinement 'SHELXL-2018/1 (Sheldrick, 2018)'
_computing_molecular_graphics     ?
_computing_publication_material   ?
_refine_special_details           ?
_refine_ls_structure_factor_coef  Fsqd
_refine_ls_matrix_type            full
_refine_ls_weighting_scheme       calc
_refine_ls_weighting_details
'w=1/[\s^2^(Fo^2^)+(0.0907P)^2^+1.1399P] where P=(Fo^2^+2Fc^2^)/3'
_atom_sites_solution_primary      ?
_atom_sites_solution_secondary    ?
_atom_sites_solution_hydrogens    geom
_refine_ls_hydrogen_treatment     constr
_refine_ls_extinction_method      none
_refine_ls_extinction_coef        .
_refine_ls_number_reflns          11617
_refine_ls_number_parameters      669
_refine_ls_number_restraints      0
_refine_ls_R_factor_all           0.1364
_refine_ls_R_factor_gt            0.0669
_refine_ls_wR_factor_ref          0.2137
_refine_ls_wR_factor_gt           0.1722
_refine_ls_goodness_of_fit_ref    1.032
_refine_ls_restrained_S_all       1.032
_refine_ls_shift/su_max           0.001
_refine_ls_shift/su_mean          0.000
 
loop_
 _atom_site_label
 _atom_site_type_symbol
 _atom_site_fract_x
 _atom_site_fract_y
 _atom_site_fract_z
 _atom_site_U_iso_or_equiv
 _atom_site_adp_type
 _atom_site_occupancy
 _atom_site_site_symmetry_order  
 _atom_site_calc_flag
 _atom_site_refinement_flags_posn
 _atom_site_refinement_flags_adp
 _atom_site_refinement_flags_occupancy
 _atom_site_disorder_assembly
 _atom_site_disorder_group
C1 C 1.0515(6) 0.2292(3) 0.7756(3) 0.0528(11) Uani 1 1 d . . . . .
C2 C 1.1234(6) 0.1982(3) 0.8242(3) 0.0581(12) Uani 1 1 d . . . . .
H2 H 1.129135 0.142179 0.804972 0.070 Uiso 1 1 calc R U . . .
C3 C 1.1873(6) 0.2487(3) 0.9010(3) 0.0619(13) Uani 1 1 d . . . . .
H3 H 1.235557 0.227118 0.933241 0.074 Uiso 1 1 calc R U . . .
C4 C 1.1781(6) 0.3308(3) 0.9285(3) 0.0642(13) Uani 1 1 d . . . . .
C5 C 1.1092(7) 0.3638(3) 0.8810(3) 0.0697(14) Uani 1 1 d . . . . .
H5 H 1.103490 0.419783 0.900454 0.084 Uiso 1 1 calc R U . . .
C6 C 1.0496(7) 0.3128(3) 0.8050(3) 0.0650(13) Uani 1 1 d . . . . .
H6 H 1.006890 0.334992 0.772449 0.078 Uiso 1 1 calc R U . . .
C7 C 0.9712(5) 0.1742(3) 0.6951(3) 0.0505(11) Uani 1 1 d . . . . .
C8 C 0.8987(7) 0.1962(3) 0.6420(3) 0.0636(13) Uani 1 1 d . . . . .
H8 H 0.898234 0.250047 0.649626 0.076 Uiso 1 1 calc R U . . .
C9 C 0.8767(5) 0.0518(3) 0.6013(3) 0.0482(11) Uani 1 1 d . . . . .
C10 C 0.8554(6) -0.0885(3) 0.5966(3) 0.0556(12) Uani 1 1 d . . . . .
H10 H 0.975651 -0.086782 0.619837 0.067 Uiso 1 1 calc R U . . .
C11 C 0.8012(6) -0.1696(3) 0.5238(3) 0.0585(12) Uani 1 1 d . . . . .
H11A H 0.901756 -0.198167 0.506675 0.070 Uiso 1 1 calc R U . . .
H11B H 0.718642 -0.204942 0.532416 0.070 Uiso 1 1 calc R U . . .
C12 C 0.7186(6) -0.1425(3) 0.4671(3) 0.0490(11) Uani 1 1 d . . . . .
C13 C 0.7347(6) -0.0690(3) 0.6559(3) 0.0523(11) Uani 1 1 d . . . . .
C14 C 0.8001(8) -0.0247(3) 0.7341(3) 0.0670(14) Uani 1 1 d . . . . .
H14 H 0.919948 -0.011283 0.750023 0.080 Uiso 1 1 calc R U . . .
C15 C 0.6889(9) -0.0006(3) 0.7884(3) 0.0772(16) Uani 1 1 d . . . . .
H15 H 0.732040 0.029355 0.840626 0.093 Uiso 1 1 calc R U . . .
C16 C 0.5135(10) -0.0220(3) 0.7629(4) 0.0766(17) Uani 1 1 d . . . . .
C17 C 0.4442(8) -0.0666(3) 0.6889(4) 0.0701(15) Uani 1 1 d . . . . .
H17 H 0.324442 -0.081677 0.674298 0.084 Uiso 1 1 calc R U . . .
C18 C 0.5551(6) -0.0896(3) 0.6346(3) 0.0583(12) Uani 1 1 d . . . . .
H18 H 0.508820 -0.119576 0.582683 0.070 Uiso 1 1 calc R U . . .
C19 C 0.6182(5) -0.1964(2) 0.3927(3) 0.0478(10) Uani 1 1 d . . . . .
C20 C 0.5686(5) -0.1823(2) 0.3299(3) 0.0468(10) Uani 1 1 d . . . . .
C21 C 0.5953(6) -0.1067(3) 0.3202(3) 0.0553(12) Uani 1 1 d . . . . .
H21A H 0.613084 -0.120943 0.268244 0.083 Uiso 1 1 calc R U . . .
H21B H 0.695899 -0.072697 0.355369 0.083 Uiso 1 1 calc R U . . .
H21C H 0.494184 -0.077658 0.330629 0.083 Uiso 1 1 calc R U . . .
C22 C 0.4144(5) -0.2787(3) 0.1972(3) 0.0503(11) Uani 1 1 d . . . . .
C23 C 0.4280(6) -0.3569(3) 0.1424(3) 0.0629(13) Uani 1 1 d . . . . .
H23 H 0.480360 -0.393709 0.157037 0.075 Uiso 1 1 calc R U . . .
C24 C 0.3639(7) -0.3801(3) 0.0664(4) 0.0765(16) Uani 1 1 d . . . . .
H24 H 0.371982 -0.432603 0.028978 0.092 Uiso 1 1 calc R U . . .
C25 C 0.2881(7) -0.3245(4) 0.0468(3) 0.0700(14) Uani 1 1 d . . . . .
C26 C 0.2705(6) -0.2473(3) 0.1000(3) 0.0660(13) Uani 1 1 d . . . . .
H26 H 0.217450 -0.210871 0.084972 0.079 Uiso 1 1 calc R U . . .
C27 C 0.3328(6) -0.2245(3) 0.1760(3) 0.0586(12) Uani 1 1 d . . . . .
H27 H 0.320067 -0.172594 0.213361 0.070 Uiso 1 1 calc R U . . .
C28 C 0.6020(5) 0.7157(3) 0.7609(3) 0.0494(11) Uani 1 1 d . . . . .
C29 C 0.5597(6) 0.6833(3) 0.8093(3) 0.0573(12) Uani 1 1 d . . . . .
H29 H 0.549000 0.626925 0.791799 0.069 Uiso 1 1 calc R U . . .
C30 C 0.5331(6) 0.7335(3) 0.8835(3) 0.0635(13) Uani 1 1 d . . . . .
H30 H 0.502325 0.710911 0.915324 0.076 Uiso 1 1 calc R U . . .
C31 C 0.5521(6) 0.8162(3) 0.9097(3) 0.0593(12) Uani 1 1 d . . . . .
C32 C 0.5896(7) 0.8504(3) 0.8618(3) 0.0682(14) Uani 1 1 d . . . . .
H32 H 0.597885 0.906733 0.879320 0.082 Uiso 1 1 calc R U . . .
C33 C 0.6143(6) 0.8002(3) 0.7883(3) 0.0611(13) Uani 1 1 d . . . . .
H33 H 0.639827 0.822994 0.755974 0.073 Uiso 1 1 calc R U . . .
C34 C 0.6393(5) 0.6622(2) 0.6832(3) 0.0484(10) Uani 1 1 d . . . . .
C35 C 0.6613(6) 0.6835(3) 0.6265(3) 0.0588(12) Uani 1 1 d . . . . .
H35 H 0.650539 0.735497 0.630196 0.071 Uiso 1 1 calc R U . . .
C36 C 0.7002(5) 0.5441(3) 0.5967(3) 0.0480(10) Uani 1 1 d . . . . .
C37 C 0.7381(6) 0.4091(3) 0.6007(3) 0.0561(12) Uani 1 1 d . . . . .
H37 H 0.632076 0.408194 0.623109 0.067 Uiso 1 1 calc R U . . .
C38 C 0.7415(7) 0.3285(3) 0.5300(3) 0.0576(12) Uani 1 1 d . . . . .
H38A H 0.829254 0.296986 0.540410 0.069 Uiso 1 1 calc R U . . .
H38B H 0.628588 0.296095 0.513337 0.069 Uiso 1 1 calc R U . . .
C39 C 0.7867(6) 0.3545(3) 0.4703(3) 0.0509(11) Uani 1 1 d . . . . .
C40 C 0.8995(6) 0.4341(2) 0.6620(3) 0.0482(10) Uani 1 1 d . . . . .
C41 C 1.0646(6) 0.4160(3) 0.6435(3) 0.0579(12) Uani 1 1 d . . . . .
H41 H 1.076249 0.385633 0.592055 0.069 Uiso 1 1 calc R U . . .
C42 C 1.2128(7) 0.4415(3) 0.6990(4) 0.0660(14) Uani 1 1 d . . . . .
H42 H 1.322585 0.428595 0.686020 0.079 Uiso 1 1 calc R U . . .
C43 C 1.1898(7) 0.4864(3) 0.7732(4) 0.0680(15) Uani 1 1 d . . . . .
C44 C 1.0318(7) 0.5067(3) 0.7950(3) 0.0668(14) Uani 1 1 d . . . . .
H44 H 1.022400 0.537907 0.846609 0.080 Uiso 1 1 calc R U . . .
C45 C 0.8852(7) 0.4799(3) 0.7387(3) 0.0586(12) Uani 1 1 d . . . . .
H45 H 0.776110 0.492821 0.752611 0.070 Uiso 1 1 calc R U . . .
C46 C 0.8336(5) 0.2999(2) 0.3979(3) 0.0474(10) Uani 1 1 d . . . . .
C47 C 0.8483(5) 0.3107(2) 0.3335(3) 0.0473(10) Uani 1 1 d . . . . .
C48 C 0.8196(6) 0.3831(3) 0.3193(3) 0.0552(12) Uani 1 1 d . . . . .
H48A H 0.927341 0.418004 0.334437 0.083 Uiso 1 1 calc R U . . .
H48B H 0.733823 0.412756 0.348870 0.083 Uiso 1 1 calc R U . . .
H48C H 0.778963 0.365350 0.265479 0.083 Uiso 1 1 calc R U . . .
C49 C 0.9162(6) 0.2087(3) 0.2036(3) 0.0530(11) Uani 1 1 d . . . . .
C50 C 0.8701(7) 0.1263(3) 0.1544(3) 0.0643(13) Uani 1 1 d . . . . .
H50 H 0.825492 0.091711 0.173000 0.077 Uiso 1 1 calc R U . . .
C51 C 0.8904(7) 0.0959(3) 0.0782(3) 0.0724(15) Uani 1 1 d . . . . .
H51 H 0.862160 0.040572 0.045059 0.087 Uiso 1 1 calc R U . . .
C52 C 0.9521(7) 0.1478(4) 0.0524(3) 0.0715(15) Uani 1 1 d . . . . .
C53 C 0.9985(6) 0.2297(3) 0.0991(3) 0.0665(14) Uani 1 1 d . . . . .
H53 H 1.040260 0.263841 0.079444 0.080 Uiso 1 1 calc R U . . .
C54 C 0.9814(6) 0.2601(3) 0.1763(3) 0.0593(12) Uani 1 1 d . . . . .
H54 H 1.014052 0.315135 0.209447 0.071 Uiso 1 1 calc R U . . .
N1 N 0.9590(5) 0.0908(2) 0.6719(2) 0.0514(9) Uani 1 1 d . . . . .
N2 N 0.8459(5) -0.0308(2) 0.5616(2) 0.0572(10) Uani 1 1 d . . . . .
N3 N 0.7453(5) -0.0646(2) 0.4891(2) 0.0512(9) Uani 1 1 d . . . . .
N4 N 0.5635(5) -0.2753(2) 0.3742(3) 0.0604(10) Uani 1 1 d . . . . .
N5 N 0.4810(5) -0.3112(2) 0.3035(3) 0.0608(10) Uani 1 1 d . . . . .
N6 N 0.4842(4) -0.2545(2) 0.2757(2) 0.0471(9) Uani 1 1 d . . . . .
N7 N 0.6601(5) 0.5813(2) 0.6653(2) 0.0510(9) Uani 1 1 d . . . . .
N8 N 0.7300(5) 0.4651(2) 0.5639(2) 0.0575(10) Uani 1 1 d . . . . .
N9 N 0.7757(5) 0.4308(2) 0.4904(2) 0.0509(9) Uani 1 1 d . . . . .
N10 N 0.8736(5) 0.2236(2) 0.3848(3) 0.0598(10) Uani 1 1 d . . . . .
N11 N 0.9093(5) 0.1856(2) 0.3146(3) 0.0620(11) Uani 1 1 d . . . . .
N12 N 0.8939(4) 0.2382(2) 0.2826(2) 0.0492(9) Uani 1 1 d . . . . .
S1 S 0.80687(17) 0.11297(8) 0.55811(8) 0.0617(3) Uani 1 1 d . . . . .
S2 S 0.71166(16) 0.60267(7) 0.54661(8) 0.0580(3) Uani 1 1 d . . . . .
Br1 Br 1.25545(9) 0.40092(4) 1.03528(4) 0.0892(2) Uani 1 1 d . . . . .
Br2 Br 0.53393(8) 0.88552(4) 1.01376(4) 0.0832(2) Uani 1 1 d . . . . .
F1 F 0.4024(6) 0.0031(2) 0.8161(2) 0.1158(14) Uani 1 1 d . . . . .
F2 F 0.2271(5) -0.3482(2) -0.0292(2) 0.1077(12) Uani 1 1 d . . . . .
F3 F 1.3350(4) 0.5119(2) 0.8284(2) 0.0983(11) Uani 1 1 d . . . . .
F4 F 0.9685(5) 0.1185(2) -0.0233(2) 0.0999(11) Uani 1 1 d . . . . .
 
loop_
 _atom_site_aniso_label
 _atom_site_aniso_U_11
 _atom_site_aniso_U_22
 _atom_site_aniso_U_33
 _atom_site_aniso_U_23
 _atom_site_aniso_U_13
 _atom_site_aniso_U_12
C1 0.049(2) 0.055(3) 0.062(3) 0.033(2) 0.012(2) 0.003(2)
C2 0.062(3) 0.051(3) 0.066(4) 0.030(3) 0.011(2) 0.012(2)
C3 0.066(3) 0.065(3) 0.066(4) 0.039(3) 0.009(3) 0.012(2)
C4 0.057(3) 0.060(3) 0.074(4) 0.032(3) 0.004(3) -0.006(2)
C5 0.084(4) 0.052(3) 0.075(4) 0.033(3) 0.003(3) -0.006(2)
C6 0.083(3) 0.052(3) 0.067(4) 0.037(3) -0.002(3) -0.002(2)
C7 0.049(2) 0.050(2) 0.066(3) 0.036(2) 0.016(2) 0.0097(19)
C8 0.084(3) 0.051(3) 0.068(4) 0.035(3) 0.019(3) 0.013(2)
C9 0.046(2) 0.053(2) 0.058(3) 0.033(2) 0.016(2) 0.0090(19)
C10 0.060(3) 0.055(3) 0.058(3) 0.034(2) -0.001(2) 0.008(2)
C11 0.070(3) 0.053(3) 0.060(3) 0.029(2) 0.015(2) 0.019(2)
C12 0.057(2) 0.048(2) 0.054(3) 0.031(2) 0.020(2) 0.018(2)
C13 0.071(3) 0.041(2) 0.048(3) 0.024(2) 0.003(2) 0.006(2)
C14 0.088(4) 0.054(3) 0.064(4) 0.035(3) -0.004(3) -0.006(3)
C15 0.123(5) 0.058(3) 0.052(4) 0.028(3) 0.012(4) -0.008(3)
C16 0.124(5) 0.047(3) 0.069(4) 0.029(3) 0.040(4) 0.009(3)
C17 0.085(4) 0.051(3) 0.082(5) 0.033(3) 0.026(3) 0.008(3)
C18 0.076(3) 0.045(2) 0.057(3) 0.026(2) 0.009(3) 0.009(2)
C19 0.050(2) 0.044(2) 0.055(3) 0.026(2) 0.013(2) 0.0121(19)
C20 0.046(2) 0.042(2) 0.058(3) 0.024(2) 0.015(2) 0.0109(18)
C21 0.059(3) 0.050(2) 0.066(3) 0.033(2) 0.009(2) 0.005(2)
C22 0.047(2) 0.050(2) 0.056(3) 0.026(2) 0.008(2) 0.0027(19)
C23 0.069(3) 0.052(3) 0.067(4) 0.027(3) 0.010(3) 0.011(2)
C24 0.083(4) 0.063(3) 0.065(4) 0.012(3) 0.011(3) 0.001(3)
C25 0.068(3) 0.085(4) 0.052(4) 0.029(3) 0.004(3) -0.004(3)
C26 0.068(3) 0.068(3) 0.065(4) 0.035(3) 0.000(3) 0.002(3)
C27 0.057(3) 0.056(3) 0.066(4) 0.030(3) 0.012(2) 0.008(2)
C28 0.043(2) 0.054(2) 0.059(3) 0.033(2) 0.004(2) 0.0076(19)
C29 0.055(3) 0.056(3) 0.065(4) 0.031(3) 0.008(2) 0.003(2)
C30 0.065(3) 0.074(3) 0.062(4) 0.039(3) 0.012(3) 0.008(2)
C31 0.057(3) 0.065(3) 0.059(3) 0.030(3) 0.010(2) 0.016(2)
C32 0.087(4) 0.052(3) 0.066(4) 0.024(3) 0.018(3) 0.019(3)
C33 0.078(3) 0.051(3) 0.065(4) 0.034(3) 0.016(3) 0.017(2)
C34 0.047(2) 0.043(2) 0.057(3) 0.025(2) 0.003(2) 0.0065(18)
C35 0.070(3) 0.047(2) 0.067(4) 0.032(2) 0.011(3) 0.012(2)
C36 0.039(2) 0.045(2) 0.059(3) 0.025(2) -0.001(2) 0.0011(18)
C37 0.068(3) 0.049(2) 0.061(3) 0.032(2) 0.012(2) 0.006(2)
C38 0.078(3) 0.047(2) 0.046(3) 0.023(2) 0.001(2) -0.003(2)
C39 0.055(2) 0.045(2) 0.053(3) 0.024(2) 0.000(2) 0.0016(19)
C40 0.062(3) 0.040(2) 0.050(3) 0.025(2) 0.011(2) 0.0088(19)
C41 0.071(3) 0.046(2) 0.059(3) 0.024(2) 0.013(3) 0.014(2)
C42 0.066(3) 0.057(3) 0.084(4) 0.038(3) 0.015(3) 0.016(2)
C43 0.076(3) 0.049(3) 0.078(4) 0.033(3) -0.011(3) 0.007(2)
C44 0.094(4) 0.054(3) 0.052(3) 0.023(3) 0.009(3) 0.017(3)
C45 0.073(3) 0.052(3) 0.057(3) 0.028(2) 0.016(3) 0.013(2)
C46 0.049(2) 0.039(2) 0.055(3) 0.024(2) -0.002(2) -0.0010(18)
C47 0.042(2) 0.042(2) 0.058(3) 0.025(2) 0.001(2) 0.0010(18)
C48 0.057(3) 0.051(2) 0.065(3) 0.035(2) 0.003(2) 0.006(2)
C49 0.050(2) 0.058(3) 0.054(3) 0.028(2) 0.005(2) 0.010(2)
C50 0.072(3) 0.053(3) 0.065(4) 0.024(3) 0.011(3) 0.003(2)
C51 0.081(4) 0.068(3) 0.059(4) 0.020(3) 0.008(3) 0.003(3)
C52 0.062(3) 0.098(4) 0.054(4) 0.032(3) 0.014(3) 0.021(3)
C53 0.060(3) 0.086(4) 0.069(4) 0.048(3) 0.013(3) 0.009(3)
C54 0.059(3) 0.063(3) 0.064(4) 0.037(3) 0.008(2) 0.006(2)
N1 0.051(2) 0.049(2) 0.063(3) 0.032(2) 0.0124(19) 0.0102(16)
N2 0.073(2) 0.049(2) 0.056(3) 0.028(2) 0.010(2) 0.0104(18)
N3 0.054(2) 0.053(2) 0.053(3) 0.0293(19) 0.0105(18) 0.0102(17)
N4 0.082(3) 0.043(2) 0.065(3) 0.031(2) 0.014(2) 0.0135(19)
N5 0.079(3) 0.047(2) 0.063(3) 0.031(2) 0.010(2) 0.0056(19)
N6 0.0508(19) 0.0409(18) 0.056(3) 0.0265(18) 0.0109(17) 0.0082(15)
N7 0.056(2) 0.046(2) 0.056(3) 0.0282(19) 0.0058(18) 0.0094(16)
N8 0.080(3) 0.048(2) 0.048(3) 0.0249(19) 0.009(2) 0.0146(19)
N9 0.057(2) 0.048(2) 0.051(3) 0.0264(19) 0.0020(18) 0.0059(16)
N10 0.078(3) 0.047(2) 0.059(3) 0.029(2) 0.005(2) 0.0109(19)
N11 0.081(3) 0.049(2) 0.063(3) 0.031(2) 0.012(2) 0.017(2)
N12 0.0497(19) 0.048(2) 0.055(3) 0.0284(19) 0.0048(17) 0.0062(16)
S1 0.0763(8) 0.0592(7) 0.0614(9) 0.0369(7) 0.0114(6) 0.0144(6)
S2 0.0690(7) 0.0553(7) 0.0582(8) 0.0327(6) 0.0101(6) 0.0104(6)
Br1 0.1145(5) 0.0770(4) 0.0677(4) 0.0289(3) 0.0030(4) -0.0051(3)
Br2 0.0975(4) 0.0878(4) 0.0637(4) 0.0292(3) 0.0210(3) 0.0300(3)
F1 0.170(4) 0.089(2) 0.096(3) 0.034(2) 0.076(3) 0.013(2)
F2 0.121(3) 0.127(3) 0.057(2) 0.033(2) -0.011(2) -0.006(2)
F3 0.094(2) 0.088(2) 0.096(3) 0.037(2) -0.031(2) 0.0055(18)
F4 0.124(3) 0.114(3) 0.056(2) 0.031(2) 0.020(2) 0.014(2)
 
_geom_special_details
;
 All esds (except the esd in the dihedral angle between two l.s. planes)
 are estimated using the full covariance matrix.  The cell esds are taken
 into account individually in the estimation of esds in distances, angles
 and torsion angles; correlations between esds in cell parameters are only
 used when they are defined by crystal symmetry.  An approximate (isotropic)
 treatment of cell esds is used for estimating esds involving l.s. planes.
;
 
loop_
 _geom_bond_atom_site_label_1
 _geom_bond_atom_site_label_2
 _geom_bond_distance
 _geom_bond_site_symmetry_2
 _geom_bond_publ_flag
C1 C2 1.380(7) . ?
C1 C6 1.381(6) . ?
C1 C7 1.482(7) . ?
C2 C3 1.384(7) . ?
C2 H2 0.9300 . ?
C3 C4 1.365(7) . ?
C3 H3 0.9300 . ?
C4 C5 1.380(7) . ?
C4 Br1 1.909(6) . ?
C5 C6 1.368(7) . ?
C5 H5 0.9300 . ?
C6 H6 0.9300 . ?
C7 C8 1.341(7) . ?
C7 N1 1.384(5) . ?
C8 S1 1.717(5) . ?
C8 H8 0.9300 . ?
C9 N1 1.306(6) . ?
C9 N2 1.356(6) . ?
C9 S1 1.739(4) . ?
C10 N2 1.487(6) . ?
C10 C13 1.510(7) . ?
C10 C11 1.535(7) . ?
C10 H10 0.9800 . ?
C11 C12 1.489(6) . ?
C11 H11A 0.9700 . ?
C11 H11B 0.9700 . ?
C12 N3 1.294(5) . ?
C12 C19 1.447(6) . ?
C13 C18 1.390(7) . ?
C13 C14 1.393(7) . ?
C14 C15 1.381(8) . ?
C14 H14 0.9300 . ?
C15 C16 1.368(9) . ?
C15 H15 0.9300 . ?
C16 C17 1.337(8) . ?
C16 F1 1.367(6) . ?
C17 C18 1.381(7) . ?
C17 H17 0.9300 . ?
C18 H18 0.9300 . ?
C19 N4 1.359(5) . ?
C19 C20 1.374(6) . ?
C20 N6 1.351(6) . ?
C20 C21 1.486(6) . ?
C21 H21A 0.9600 . ?
C21 H21B 0.9600 . ?
C21 H21C 0.9600 . ?
C22 C23 1.379(6) . ?
C22 C27 1.380(6) . ?
C22 N6 1.423(6) . ?
C23 C24 1.372(8) . ?
C23 H23 0.9300 . ?
C24 C25 1.366(8) . ?
C24 H24 0.9300 . ?
C25 F2 1.364(6) . ?
C25 C26 1.364(7) . ?
C26 C27 1.371(7) . ?
C26 H26 0.9300 . ?
C27 H27 0.9300 . ?
C28 C29 1.378(6) . ?
C28 C33 1.391(6) . ?
C28 C34 1.475(6) . ?
C29 C30 1.383(7) . ?
C29 H29 0.9300 . ?
C30 C31 1.363(7) . ?
C30 H30 0.9300 . ?
C31 C32 1.383(7) . ?
C31 Br2 1.895(5) . ?
C32 C33 1.368(7) . ?
C32 H32 0.9300 . ?
C33 H33 0.9300 . ?
C34 C35 1.351(7) . ?
C34 N7 1.386(5) . ?
C35 S2 1.720(5) . ?
C35 H35 0.9300 . ?
C36 N7 1.296(6) . ?
C36 N8 1.345(5) . ?
C36 S2 1.744(5) . ?
C37 N8 1.486(6) . ?
C37 C38 1.521(6) . ?
C37 C40 1.522(7) . ?
C37 H37 0.9800 . ?
C38 C39 1.509(6) . ?
C38 H38A 0.9700 . ?
C38 H38B 0.9700 . ?
C39 N9 1.285(5) . ?
C39 C46 1.433(6) . ?
C40 C45 1.381(7) . ?
C40 C41 1.389(6) . ?
C41 C42 1.386(7) . ?
C41 H41 0.9300 . ?
C42 C43 1.357(8) . ?
C42 H42 0.9300 . ?
C43 C44 1.361(7) . ?
C43 F3 1.366(6) . ?
C44 C45 1.386(7) . ?
C44 H44 0.9300 . ?
C45 H45 0.9300 . ?
C46 N10 1.363(5) . ?
C46 C47 1.371(6) . ?
C47 N12 1.359(5) . ?
C47 C48 1.489(6) . ?
C48 H48A 0.9600 . ?
C48 H48B 0.9600 . ?
C48 H48C 0.9600 . ?
C49 C54 1.373(6) . ?
C49 C50 1.388(6) . ?
C49 N12 1.431(6) . ?
C50 C51 1.375(7) . ?
C50 H50 0.9300 . ?
C51 C52 1.349(8) . ?
C51 H51 0.9300 . ?
C52 F4 1.359(6) . ?
C52 C53 1.372(8) . ?
C53 C54 1.386(7) . ?
C53 H53 0.9300 . ?
C54 H54 0.9300 . ?
N2 N3 1.386(5) . ?
N4 N5 1.305(6) . ?
N5 N6 1.365(5) . ?
N8 N9 1.392(5) . ?
N10 N11 1.310(6) . ?
N11 N12 1.359(5) . ?
 
loop_
 _geom_angle_atom_site_label_1
 _geom_angle_atom_site_label_2
 _geom_angle_atom_site_label_3
 _geom_angle
 _geom_angle_site_symmetry_1
 _geom_angle_site_symmetry_3
 _geom_angle_publ_flag
C2 C1 C6 118.2(5) . . ?
C2 C1 C7 121.0(4) . . ?
C6 C1 C7 120.8(4) . . ?
C1 C2 C3 121.4(4) . . ?
C1 C2 H2 119.3 . . ?
C3 C2 H2 119.3 . . ?
C4 C3 C2 118.7(5) . . ?
C4 C3 H3 120.7 . . ?
C2 C3 H3 120.7 . . ?
C3 C4 C5 121.3(5) . . ?
C3 C4 Br1 119.3(4) . . ?
C5 C4 Br1 119.4(4) . . ?
C6 C5 C4 119.0(5) . . ?
C6 C5 H5 120.5 . . ?
C4 C5 H5 120.5 . . ?
C5 C6 C1 121.4(5) . . ?
C5 C6 H6 119.3 . . ?
C1 C6 H6 119.3 . . ?
C8 C7 N1 114.9(5) . . ?
C8 C7 C1 127.0(4) . . ?
N1 C7 C1 117.9(4) . . ?
C7 C8 S1 111.9(4) . . ?
C7 C8 H8 124.1 . . ?
S1 C8 H8 124.1 . . ?
N1 C9 N2 124.2(4) . . ?
N1 C9 S1 115.5(3) . . ?
N2 C9 S1 120.2(4) . . ?
N2 C10 C13 110.8(4) . . ?
N2 C10 C11 99.7(4) . . ?
C13 C10 C11 114.7(4) . . ?
N2 C10 H10 110.4 . . ?
C13 C10 H10 110.4 . . ?
C11 C10 H10 110.4 . . ?
C12 C11 C10 102.6(4) . . ?
C12 C11 H11A 111.3 . . ?
C10 C11 H11A 111.3 . . ?
C12 C11 H11B 111.3 . . ?
C10 C11 H11B 111.3 . . ?
H11A C11 H11B 109.2 . . ?
N3 C12 C19 121.0(4) . . ?
N3 C12 C11 114.3(4) . . ?
C19 C12 C11 124.7(4) . . ?
C18 C13 C14 117.9(5) . . ?
C18 C13 C10 121.6(4) . . ?
C14 C13 C10 120.4(5) . . ?
C15 C14 C13 120.8(5) . . ?
C15 C14 H14 119.6 . . ?
C13 C14 H14 119.6 . . ?
C16 C15 C14 118.0(6) . . ?
C16 C15 H15 121.0 . . ?
C14 C15 H15 121.0 . . ?
C17 C16 F1 117.9(6) . . ?
C17 C16 C15 123.7(6) . . ?
F1 C16 C15 118.4(6) . . ?
C16 C17 C18 118.2(6) . . ?
C16 C17 H17 120.9 . . ?
C18 C17 H17 120.9 . . ?
C17 C18 C13 121.3(5) . . ?
C17 C18 H18 119.3 . . ?
C13 C18 H18 119.3 . . ?
N4 C19 C20 108.7(4) . . ?
N4 C19 C12 121.5(4) . . ?
C20 C19 C12 129.7(4) . . ?
N6 C20 C19 104.3(4) . . ?
N6 C20 C21 125.5(4) . . ?
C19 C20 C21 130.1(4) . . ?
C20 C21 H21A 109.5 . . ?
C20 C21 H21B 109.5 . . ?
H21A C21 H21B 109.5 . . ?
C20 C21 H21C 109.5 . . ?
H21A C21 H21C 109.5 . . ?
H21B C21 H21C 109.5 . . ?
C23 C22 C27 120.3(5) . . ?
C23 C22 N6 119.5(4) . . ?
C27 C22 N6 120.2(4) . . ?
C24 C23 C22 119.8(5) . . ?
C24 C23 H23 120.1 . . ?
C22 C23 H23 120.1 . . ?
C25 C24 C23 118.7(5) . . ?
C25 C24 H24 120.6 . . ?
C23 C24 H24 120.6 . . ?
F2 C25 C26 119.4(5) . . ?
F2 C25 C24 118.0(5) . . ?
C26 C25 C24 122.6(6) . . ?
C25 C26 C27 118.5(5) . . ?
C25 C26 H26 120.7 . . ?
C27 C26 H26 120.7 . . ?
C26 C27 C22 120.0(5) . . ?
C26 C27 H27 120.0 . . ?
C22 C27 H27 120.0 . . ?
C29 C28 C33 118.2(5) . . ?
C29 C28 C34 120.7(4) . . ?
C33 C28 C34 121.1(4) . . ?
C28 C29 C30 120.9(4) . . ?
C28 C29 H29 119.5 . . ?
C30 C29 H29 119.5 . . ?
C31 C30 C29 119.6(5) . . ?
C31 C30 H30 120.2 . . ?
C29 C30 H30 120.2 . . ?
C30 C31 C32 120.7(5) . . ?
C30 C31 Br2 119.9(4) . . ?
C32 C31 Br2 119.3(4) . . ?
C33 C32 C31 119.1(5) . . ?
C33 C32 H32 120.5 . . ?
C31 C32 H32 120.5 . . ?
C32 C33 C28 121.4(5) . . ?
C32 C33 H33 119.3 . . ?
C28 C33 H33 119.3 . . ?
C35 C34 N7 114.7(4) . . ?
C35 C34 C28 127.2(4) . . ?
N7 C34 C28 118.1(4) . . ?
C34 C35 S2 111.6(3) . . ?
C34 C35 H35 124.2 . . ?
S2 C35 H35 124.2 . . ?
N7 C36 N8 123.7(4) . . ?
N7 C36 S2 115.8(3) . . ?
N8 C36 S2 120.6(4) . . ?
N8 C37 C38 99.6(4) . . ?
N8 C37 C40 110.7(3) . . ?
C38 C37 C40 114.4(4) . . ?
N8 C37 H37 110.5 . . ?
C38 C37 H37 110.5 . . ?
C40 C37 H37 110.5 . . ?
C39 C38 C37 103.6(3) . . ?
C39 C38 H38A 111.0 . . ?
C37 C38 H38A 111.0 . . ?
C39 C38 H38B 111.0 . . ?
C37 C38 H38B 111.0 . . ?
H38A C38 H38B 109.0 . . ?
N9 C39 C46 123.0(4) . . ?
N9 C39 C38 113.1(4) . . ?
C46 C39 C38 123.9(4) . . ?
C45 C40 C41 117.9(5) . . ?
C45 C40 C37 119.7(4) . . ?
C41 C40 C37 122.3(4) . . ?
C42 C41 C40 122.3(5) . . ?
C42 C41 H41 118.8 . . ?
C40 C41 H41 118.8 . . ?
C43 C42 C41 116.8(5) . . ?
C43 C42 H42 121.6 . . ?
C41 C42 H42 121.6 . . ?
C42 C43 C44 123.7(5) . . ?
C42 C43 F3 117.2(5) . . ?
C44 C43 F3 119.1(6) . . ?
C43 C44 C45 118.6(5) . . ?
C43 C44 H44 120.7 . . ?
C45 C44 H44 120.7 . . ?
C40 C45 C44 120.7(5) . . ?
C40 C45 H45 119.7 . . ?
C44 C45 H45 119.7 . . ?
N10 C46 C47 109.0(4) . . ?
N10 C46 C39 120.6(4) . . ?
C47 C46 C39 130.4(4) . . ?
N12 C47 C46 104.2(4) . . ?
N12 C47 C48 126.2(4) . . ?
C46 C47 C48 129.6(4) . . ?
C47 C48 H48A 109.5 . . ?
C47 C48 H48B 109.5 . . ?
H48A C48 H48B 109.5 . . ?
C47 C48 H48C 109.5 . . ?
H48A C48 H48C 109.5 . . ?
H48B C48 H48C 109.5 . . ?
C54 C49 C50 120.1(5) . . ?
C54 C49 N12 121.4(4) . . ?
C50 C49 N12 118.5(4) . . ?
C51 C50 C49 120.0(5) . . ?
C51 C50 H50 120.0 . . ?
C49 C50 H50 120.0 . . ?
C52 C51 C50 118.8(5) . . ?
C52 C51 H51 120.6 . . ?
C50 C51 H51 120.6 . . ?
C51 C52 F4 119.1(6) . . ?
C51 C52 C53 123.0(5) . . ?
F4 C52 C53 117.9(5) . . ?
C52 C53 C54 118.3(5) . . ?
C52 C53 H53 120.9 . . ?
C54 C53 H53 120.9 . . ?
C49 C54 C53 119.8(5) . . ?
C49 C54 H54 120.1 . . ?
C53 C54 H54 120.1 . . ?
C9 N1 C7 109.9(4) . . ?
C9 N2 N3 118.6(4) . . ?
C9 N2 C10 125.2(4) . . ?
N3 N2 C10 112.8(3) . . ?
C12 N3 N2 106.9(4) . . ?
N5 N4 C19 109.4(4) . . ?
N4 N5 N6 106.9(3) . . ?
C20 N6 N5 110.7(4) . . ?
C20 N6 C22 130.0(4) . . ?
N5 N6 C22 119.1(4) . . ?
C36 N7 C34 110.2(4) . . ?
C36 N8 N9 119.5(4) . . ?
C36 N8 C37 127.0(4) . . ?
N9 N8 C37 113.3(3) . . ?
C39 N9 N8 107.5(4) . . ?
N11 N10 C46 109.0(4) . . ?
N10 N11 N12 107.2(3) . . ?
C47 N12 N11 110.7(4) . . ?
C47 N12 C49 131.5(4) . . ?
N11 N12 C49 117.7(4) . . ?
C8 S1 C9 87.7(2) . . ?
C35 S2 C36 87.7(2) . . ?
 
loop_
 _geom_hbond_atom_site_label_D 
 _geom_hbond_atom_site_label_H 
 _geom_hbond_atom_site_label_A 
 _geom_hbond_distance_DH 
 _geom_hbond_distance_HA 
 _geom_hbond_distance_DA 
 _geom_hbond_angle_DHA 
 _geom_hbond_site_symmetry_A 
 _geom_hbond_publ_flag
C17 H17 N10  0.93 2.65 3.362(7) 133.6 2_656 yes
C17 H17 N11  0.93 2.66 3.400(7) 136.6 2_656 yes
C21 H21B N3  0.96 2.53 3.098(7) 117.9 . yes
C48 H48B N9  0.96 2.61 3.128(7) 114.0 . yes
C50 H50 F1  0.93 2.51 3.384(6) 155.8 2_656 yes
 
_refine_diff_density_max    0.689
_refine_diff_density_min   -0.680
_refine_diff_density_rms    0.085

_shelx_res_file
;
TITL bmk1777e in P-1
    shelx.res
    created by SHELXL-2018/1 at 11:52:19 on 07-Apr-2021
CELL  0.71073   7.7607  18.2950  19.5252  115.910   96.971   92.567
ZERR     2.00   0.0003   0.0011   0.0014    0.006    0.004    0.004
LATT   1
SFAC  C    H    N    F    S    BR
UNIT  108 76 24 8 4 4
MERG   2
MPLA C1 C2 C3 C4 C5 C6 BR1
MPLA C7 C8 C9 N1 S1
MPLA C10 C11 C12 N2 N3
MPLA C19 C20 C21 N4 N5 N6
MPLA C22 C23 C24 C25 C26 C27 F2
MPLA C13 C14 C15 C16 C17 C18 F1
MPLA C10 C11 C12 N2 N3
MPLA C28 C29 C30 C31 C32 C33 BR2
MPLA C34 C35 C36 N7 S2
MPLA C37 C38 C39 N8 N9
MPLA C46 C47 C48 N10 N11 N12
MPLA C49 C50 C51 C52 C53 C54 F4
MPLA C40 C41 C42 C43 C44 C45 F3
MPLA C37 C38 C39 N8 N9
EQIV $1 -x+1, -y, -z+1
HTAB C17 N10_$1
HTAB C17 N11_$1
HTAB C21 N3
HTAB C48 N9
HTAB C50 F1_$1
FMAP   2
PLAN    5
SIZE     0.118   0.148   0.623
ACTA
BOND   $H
L.S.   4
WGHT    0.090700    1.139900
FVAR       3.01797
C1    1    1.051454    0.229185    0.775633    11.00000    0.04944    0.05487 =
         0.06210    0.03284    0.01183    0.00336
C2    1    1.123433    0.198194    0.824229    11.00000    0.06227    0.05098 =
         0.06594    0.02993    0.01064    0.01195
AFIX  43
H2    2    1.129135    0.142179    0.804972    11.00000   -1.20000
AFIX   0
C3    1    1.187318    0.248679    0.901006    11.00000    0.06550    0.06462 =
         0.06648    0.03901    0.00913    0.01199
AFIX  43
H3    2    1.235557    0.227118    0.933241    11.00000   -1.20000
AFIX   0
C4    1    1.178099    0.330789    0.928479    11.00000    0.05724    0.06035 =
         0.07374    0.03154    0.00401   -0.00616
C5    1    1.109248    0.363758    0.881033    11.00000    0.08423    0.05181 =
         0.07483    0.03348    0.00257   -0.00578
AFIX  43
H5    2    1.103490    0.419783    0.900454    11.00000   -1.20000
AFIX   0
C6    1    1.049594    0.312832    0.805022    11.00000    0.08307    0.05150 =
         0.06687    0.03661   -0.00180   -0.00157
AFIX  43
H6    2    1.006890    0.334992    0.772449    11.00000   -1.20000
AFIX   0
C7    1    0.971175    0.174177    0.695100    11.00000    0.04893    0.05032 =
         0.06583    0.03608    0.01648    0.00974
C8    1    0.898699    0.196191    0.641970    11.00000    0.08351    0.05117 =
         0.06835    0.03544    0.01870    0.01337
AFIX  43
H8    2    0.898234    0.250047    0.649626    11.00000   -1.20000
AFIX   0
C9    1    0.876706    0.051755    0.601254    11.00000    0.04554    0.05315 =
         0.05768    0.03302    0.01624    0.00903
C10   1    0.855386   -0.088513    0.596568    11.00000    0.06048    0.05494 =
         0.05844    0.03408   -0.00052    0.00798
AFIX  13
H10   2    0.975651   -0.086782    0.619837    11.00000   -1.20000
AFIX   0
C11   1    0.801165   -0.169623    0.523759    11.00000    0.06972    0.05309 =
         0.05953    0.02899    0.01466    0.01914
AFIX  23
H11A  2    0.901756   -0.198167    0.506675    11.00000   -1.20000
H11B  2    0.718642   -0.204942    0.532416    11.00000   -1.20000
AFIX   0
C12   1    0.718619   -0.142508    0.467078    11.00000    0.05735    0.04822 =
         0.05449    0.03076    0.01976    0.01816
C13   1    0.734745   -0.069041    0.655933    11.00000    0.07118    0.04070 =
         0.04784    0.02400    0.00289    0.00634
C14   1    0.800082   -0.024744    0.734133    11.00000    0.08771    0.05403 =
         0.06362    0.03543   -0.00358   -0.00562
AFIX  43
H14   2    0.919948   -0.011283    0.750023    11.00000   -1.20000
AFIX   0
C15   1    0.688927   -0.000560    0.788382    11.00000    0.12277    0.05805 =
         0.05195    0.02771    0.01238   -0.00835
AFIX  43
H15   2    0.732040    0.029355    0.840626    11.00000   -1.20000
AFIX   0
C16   1    0.513487   -0.021951    0.762925    11.00000    0.12395    0.04719 =
         0.06935    0.02932    0.04042    0.00927
C17   1    0.444180   -0.066577    0.688865    11.00000    0.08450    0.05138 =
         0.08190    0.03326    0.02591    0.00763
AFIX  43
H17   2    0.324442   -0.081677    0.674298    11.00000   -1.20000
AFIX   0
C18   1    0.555144   -0.089647    0.634581    11.00000    0.07553    0.04544 =
         0.05703    0.02598    0.00858    0.00909
AFIX  43
H18   2    0.508820   -0.119576    0.582683    11.00000   -1.20000
AFIX   0
C19   1    0.618172   -0.196414    0.392691    11.00000    0.05018    0.04433 =
         0.05534    0.02613    0.01339    0.01210
C20   1    0.568578   -0.182348    0.329913    11.00000    0.04551    0.04169 =
         0.05776    0.02424    0.01458    0.01087
C21   1    0.595300   -0.106722    0.320178    11.00000    0.05895    0.04964 =
         0.06557    0.03338    0.00887    0.00528
AFIX 137
H21A  2    0.613084   -0.120943    0.268244    11.00000   -1.50000
H21B  2    0.695899   -0.072697    0.355369    11.00000   -1.50000
H21C  2    0.494184   -0.077658    0.330629    11.00000   -1.50000
AFIX   0
C22   1    0.414355   -0.278744    0.197152    11.00000    0.04734    0.04981 =
         0.05616    0.02592    0.00841    0.00271
C23   1    0.427960   -0.356874    0.142445    11.00000    0.06916    0.05199 =
         0.06749    0.02651    0.00994    0.01090
AFIX  43
H23   2    0.480360   -0.393709    0.157037    11.00000   -1.20000
AFIX   0
C24   1    0.363930   -0.380060    0.066433    11.00000    0.08339    0.06262 =
         0.06466    0.01227    0.01068    0.00062
AFIX  43
H24   2    0.371982   -0.432603    0.028978    11.00000   -1.20000
AFIX   0
C25   1    0.288092   -0.324476    0.046806    11.00000    0.06836    0.08498 =
         0.05212    0.02899    0.00388   -0.00372
C26   1    0.270517   -0.247272    0.099985    11.00000    0.06764    0.06802 =
         0.06458    0.03471   -0.00038    0.00209
AFIX  43
H26   2    0.217450   -0.210871    0.084972    11.00000   -1.20000
AFIX   0
C27   1    0.332783   -0.224541    0.176015    11.00000    0.05748    0.05619 =
         0.06603    0.02989    0.01225    0.00780
AFIX  43
H27   2    0.320067   -0.172594    0.213361    11.00000   -1.20000
AFIX   0
C28   1    0.602015    0.715694    0.760863    11.00000    0.04315    0.05361 =
         0.05917    0.03299    0.00393    0.00761
C29   1    0.559741    0.683299    0.809282    11.00000    0.05492    0.05550 =
         0.06512    0.03068    0.00849    0.00346
AFIX  43
H29   2    0.549000    0.626925    0.791799    11.00000   -1.20000
AFIX   0
C30   1    0.533081    0.733473    0.883497    11.00000    0.06485    0.07384 =
         0.06206    0.03903    0.01181    0.00795
AFIX  43
H30   2    0.502325    0.710911    0.915324    11.00000   -1.20000
AFIX   0
C31   1    0.552129    0.816156    0.909728    11.00000    0.05659    0.06523 =
         0.05939    0.02966    0.00971    0.01624
C32   1    0.589600    0.850370    0.861797    11.00000    0.08651    0.05178 =
         0.06649    0.02400    0.01832    0.01857
AFIX  43
H32   2    0.597885    0.906733    0.879320    11.00000   -1.20000
AFIX   0
C33   1    0.614294    0.800178    0.788295    11.00000    0.07814    0.05080 =
         0.06526    0.03380    0.01575    0.01748
AFIX  43
H33   2    0.639827    0.822994    0.755974    11.00000   -1.20000
AFIX   0
C34   1    0.639271    0.662192    0.683188    11.00000    0.04677    0.04297 =
         0.05677    0.02460    0.00279    0.00651
C35   1    0.661290    0.683520    0.626491    11.00000    0.07040    0.04713 =
         0.06681    0.03218    0.01087    0.01214
AFIX  43
H35   2    0.650539    0.735497    0.630196    11.00000   -1.20000
AFIX   0
C36   1    0.700171    0.544052    0.596651    11.00000    0.03949    0.04529 =
         0.05881    0.02543   -0.00098    0.00108
C37   1    0.738090    0.409086    0.600731    11.00000    0.06757    0.04885 =
         0.06064    0.03204    0.01176    0.00634
AFIX  13
H37   2    0.632076    0.408194    0.623109    11.00000   -1.20000
AFIX   0
C38   1    0.741513    0.328493    0.530020    11.00000    0.07828    0.04742 =
         0.04625    0.02321    0.00143   -0.00292
AFIX  23
H38A  2    0.829254    0.296986    0.540410    11.00000   -1.20000
H38B  2    0.628588    0.296095    0.513337    11.00000   -1.20000
AFIX   0
C39   1    0.786660    0.354498    0.470314    11.00000    0.05457    0.04505 =
         0.05284    0.02400    0.00040    0.00157
C40   1    0.899506    0.434096    0.662017    11.00000    0.06190    0.03976 =
         0.04978    0.02534    0.01106    0.00877
C41   1    1.064636    0.415986    0.643515    11.00000    0.07076    0.04648 =
         0.05894    0.02443    0.01272    0.01371
AFIX  43
H41   2    1.076249    0.385633    0.592055    11.00000   -1.20000
AFIX   0
C42   1    1.212768    0.441541    0.699019    11.00000    0.06637    0.05726 =
         0.08385    0.03849    0.01512    0.01626
AFIX  43
H42   2    1.322585    0.428595    0.686020    11.00000   -1.20000
AFIX   0
C43   1    1.189814    0.486365    0.773247    11.00000    0.07614    0.04890 =
         0.07796    0.03317   -0.01120    0.00666
C44   1    1.031796    0.506690    0.795022    11.00000    0.09376    0.05428 =
         0.05191    0.02313    0.00871    0.01694
AFIX  43
H44   2    1.022400    0.537907    0.846609    11.00000   -1.20000
AFIX   0
C45   1    0.885225    0.479867    0.738669    11.00000    0.07295    0.05215 =
         0.05681    0.02795    0.01583    0.01311
AFIX  43
H45   2    0.776110    0.492821    0.752611    11.00000   -1.20000
AFIX   0
C46   1    0.833558    0.299918    0.397879    11.00000    0.04859    0.03891 =
         0.05486    0.02412   -0.00220   -0.00099
C47   1    0.848298    0.310673    0.333519    11.00000    0.04248    0.04234 =
         0.05790    0.02531    0.00060    0.00098
C48   1    0.819554    0.383130    0.319315    11.00000    0.05725    0.05116 =
         0.06488    0.03454    0.00304    0.00593
AFIX 137
H48A  2    0.927341    0.418004    0.334437    11.00000   -1.50000
H48B  2    0.733823    0.412756    0.348870    11.00000   -1.50000
H48C  2    0.778963    0.365350    0.265479    11.00000   -1.50000
AFIX   0
C49   1    0.916221    0.208733    0.203619    11.00000    0.04983    0.05772 =
         0.05437    0.02816    0.00460    0.01003
C50   1    0.870128    0.126341    0.154414    11.00000    0.07166    0.05322 =
         0.06501    0.02378    0.01139    0.00333
AFIX  43
H50   2    0.825492    0.091711    0.173000    11.00000   -1.20000
AFIX   0
C51   1    0.890429    0.095905    0.078212    11.00000    0.08067    0.06768 =
         0.05869    0.02017    0.00835    0.00342
AFIX  43
H51   2    0.862160    0.040572    0.045059    11.00000   -1.20000
AFIX   0
C52   1    0.952134    0.147800    0.052404    11.00000    0.06229    0.09814 =
         0.05419    0.03153    0.01425    0.02126
C53   1    0.998483    0.229662    0.099089    11.00000    0.06036    0.08569 =
         0.06892    0.04785    0.01288    0.00910
AFIX  43
H53   2    1.040260    0.263841    0.079444    11.00000   -1.20000
AFIX   0
C54   1    0.981433    0.260097    0.176273    11.00000    0.05864    0.06325 =
         0.06441    0.03684    0.00753    0.00578
AFIX  43
H54   2    1.014052    0.315135    0.209447    11.00000   -1.20000
AFIX   0
N1    3    0.958961    0.090785    0.671897    11.00000    0.05124    0.04919 =
         0.06324    0.03242    0.01240    0.01018
N2    3    0.845914   -0.030809    0.561623    11.00000    0.07303    0.04898 =
         0.05551    0.02828    0.01033    0.01040
N3    3    0.745275   -0.064608    0.489117    11.00000    0.05436    0.05318 =
         0.05320    0.02933    0.01052    0.01015
N4    3    0.563536   -0.275338    0.374246    11.00000    0.08201    0.04344 =
         0.06461    0.03085    0.01448    0.01353
N5    3    0.480953   -0.311161    0.303549    11.00000    0.07925    0.04674 =
         0.06334    0.03123    0.00965    0.00563
N6    3    0.484164   -0.254490    0.275732    11.00000    0.05078    0.04086 =
         0.05617    0.02651    0.01090    0.00820
N7    3    0.660120    0.581291    0.665289    11.00000    0.05569    0.04650 =
         0.05617    0.02822    0.00577    0.00939
N8    3    0.730013    0.465062    0.563899    11.00000    0.08026    0.04807 =
         0.04847    0.02492    0.00921    0.01460
N9    3    0.775750    0.430840    0.490361    11.00000    0.05717    0.04771 =
         0.05095    0.02641    0.00200    0.00588
N10   3    0.873638    0.223620    0.384823    11.00000    0.07774    0.04720 =
         0.05891    0.02889    0.00497    0.01093
N11   3    0.909255    0.185594    0.314614    11.00000    0.08149    0.04860 =
         0.06316    0.03057    0.01156    0.01745
N12   3    0.893872    0.238212    0.282649    11.00000    0.04973    0.04788 =
         0.05505    0.02839    0.00478    0.00624
S1    5    0.806871    0.112967    0.558112    11.00000    0.07628    0.05918 =
         0.06141    0.03686    0.01144    0.01444
S2    5    0.711662    0.602668    0.546609    11.00000    0.06901    0.05529 =
         0.05820    0.03272    0.01009    0.01037
BR1   6    1.255455    0.400920    1.035279    11.00000    0.11453    0.07698 =
         0.06772    0.02887    0.00299   -0.00508
BR2   6    0.533933    0.885522    1.013759    11.00000    0.09748    0.08776 =
         0.06367    0.02921    0.02097    0.03004
F1    4    0.402384    0.003109    0.816076    11.00000    0.16996    0.08873 =
         0.09605    0.03415    0.07640    0.01256
F2    4    0.227090   -0.348178   -0.029154    11.00000    0.12133    0.12697 =
         0.05728    0.03322   -0.01121   -0.00562
F3    4    1.335011    0.511870    0.828371    11.00000    0.09360    0.08835 =
         0.09579    0.03747   -0.03081    0.00545
F4    4    0.968498    0.118460   -0.023316    11.00000    0.12416    0.11391 =
         0.05611    0.03127    0.02033    0.01370
HKLF    4


REM  bmk1777e in P-1
REM R1 =  0.0669 for    5906 Fo > 4sig(Fo)  and  0.1364 for all   11617 data
REM    669 parameters refined using      0 restraints

END

WGHT      0.0907      1.1399

REM Highest difference peak  0.689,  deepest hole -0.680,  1-sigma level  0.085
Q1    1   0.7062  0.8822  1.0142  11.00000  0.05    0.69
Q2    1   0.1130 -0.4041 -0.0330  11.00000  0.05    0.66
Q3    1   0.3437  0.8814  1.0126  11.00000  0.05    0.63
Q4    1   1.4652  0.4034  1.0331  11.00000  0.05    0.61
Q5    1   0.3583 -0.4011 -0.0365  11.00000  0.05    0.61
;
_shelx_res_checksum   26882

_shelx_hkl_file
;
   0   0   3 135913. 1394.50   1
   0   0   4 27214.1 731.736   1
   0   0   5 40615.6 1024.14   1
   0   0   6 116028. 1817.35   1
   0   0   7 918.200 230.977   1
   0   0   8 22809.0 930.954   1
   0   0   9 15259.8 818.717   1
   0   0  10 2291.08 243.037   4
   0   0  10 1838.53 341.008   1
   0   0  11 515.845 261.173   1
   0   0  11 1078.84 183.670   4
   0   0  12 3355.96 317.313   4
   0   0 -12 2332.07 419.272   1
   0   0  12 4024.59 480.915   1
   0   0  12 3360.09 581.983   5
   0   0  13 448.529 195.124   1
   0   0  13 71.1149 266.667   5
   0   0 -13 98.9686 207.686   1
   0   0  13 535.039 156.948   4
   0   0  14 12671.0 1223.52   5
   0   0  14 12150.3 656.190   4
   0   0  15 686.437 171.229   4
   0   0  15 1045.17 392.738   5
   0   0  16 1587.88 470.946   5
   0   0  16 1413.06 249.066   4
   0   0  17 6266.62 921.966   5
   0   0  17 4624.67 456.951   4
   0   0  18 313.095 298.836   5
   0   0  19 1559.55 525.829   5
   0   0  20 178.871 238.154   5
   0   0  21-110.843 338.546   5
   0  -1  22-305.395 406.291   5
   0  -1  21 434.203 332.060   5
   0  -1  20-22.8364 318.221   5
   0  -1  19 625.268 302.452   5
   0  -1  18 17.6537 361.834   5
   0  -1  18 237.305 132.064   4
   0  -1  17 852.958 282.384   5
   0  -1  17 1113.99 230.195   4
   0  -1  16 614.783 252.367   1
   0  -1  16 818.645 187.558   4
   0  -1  16 593.194 230.606   5
   0  -1  15 189.558 109.176   4
   0  -1  15 93.2657 166.683   1
   0  -1  14 2048.16 276.953   4
   0  -1  14 1632.69 341.923   1
   0   1 -13 5194.34 568.235   1
   0  -1  13 4449.77 378.218   4
   0  -1  13 4546.97 544.591   1
   0  -1  12 2847.30 426.596   1
   0  -1  11 8805.86 807.306   1
   0  -1  10 18004.7 904.763   1
   0  -1   9 26848.5 1056.41   1
   0  -1   8 9520.00 592.668   1
   0  -1   7 13304.4 657.714   1
   0  -1   6 9505.82 507.626   1
   0  -1   5 13934.5 544.994   1
   0  -1   4 2482.85 209.217   1
   0  -1   3 3758.55 217.576   1
   0   1   2 1079.89 140.342   5
   0   1   3 155.729 34.5526   4
   0   1   3 32.4081 100.346   5
   0   1   4 233.304 47.7974   4
   0   1   4 119.748 94.9131   5
   0   1   5 2129.74 247.068   1
   0   1   5 2406.06 164.487   4
   0   1   5 2261.74 308.723   5
   0   1   6 192.828 107.796   5
   0   1   6 291.088 126.577   1
   0   1   6 432.398 77.7827   4
   0   1   7 8471.75 554.992   1
   0   1   7 8368.58 709.243   5
   0   1   7 7864.82 356.661   4
   0   1   8 7332.09 367.190   4
   0   1   8 7342.23 677.393   5
   0   1   8 6446.03 524.125   1
   0   1   9 4284.70 302.831   4
   0   1   9 4654.70 599.789   5
   0   1  10 9564.90 908.199   5
   0   1  10 8880.20 463.702   4
   0   1  11 5657.67 391.392   4
   0  -1 -11 4555.03 597.591   1
   0   1  11 6027.53 746.958   5
   0   1  12 24707.9 849.873   4
   0   1  12 23836.0 1536.21   5
   0  -1 -12 27947.0 1388.24   1
   0   1  13 5111.62 747.208   5
   0   1  13 5065.29 403.700   4
   0   1  14 12888.8 1221.73   5
   0   1  14 11300.4 622.259   4
   0   1  15 3879.46 378.867   4
   0   1  15 4670.10 750.394   5
   0   1  16 4654.51 785.396   5
   0   1  16 4058.32 409.387   4
   0   1  17 3442.33 708.150   5
   0   1  18 2673.50 662.922   5
   0   1  19 2052.22 606.547   5
   0   1  20 364.831 286.463   5
   0   1  21 1021.68 479.010   5
   0  -2  22-582.631 443.846   5
   0  -2  21 362.442 297.460   5
   0  -2  20 83.4119 241.934   5
   0  -2  19 1663.28 531.849   5
   0  -2  18 306.209 141.433   4
   0  -2  18 99.2656 187.077   1
   0  -2  18-92.5936 336.655   5
   0  -2  17 564.503 175.058   4
   0  -2  17 66.3247 174.447   1
   0  -2  16 6415.81 533.559   4
   0  -2  16 4780.32 675.414   1
   0  -2  15 87.7817 91.1859   4
   0  -2  15-71.0733 228.447   1
   0  -2  14 10147.5 844.858   1
   0  -2  13 52807.0 1784.29   1
   0   2 -13 46054.5 1601.41   1
   0  -2  12 11503.2 828.777   1
   0  -2  11 62001.1 1753.98   1
   0  -2  10 196001. 3017.86   1
   0  -2   9 53702.3 1455.90   1
   0  -2   8 34053.2 1078.30   1
   0  -2   7 155539. 2120.48   1
   0  -2   6 11210.5 543.324   1
   0  -2   5 27157.3 742.838   1
   0  -2   4 19968.0 526.231   1
   0  -2   3 4374.34 239.226   1
   0   2  -3 5823.82 243.543   2
   0   2   1 29555.0 658.042   5
   0  -2  -1 28777.1 665.985   5
   0  -2  -2 8835.17 460.460   5
   0   2   2 9596.80 451.941   5
   0  -2  -3 26195.6 412.352   4
   0   2   3 25309.0 870.197   5
   0  -2  -3 24955.1 885.358   5
   0   2   4 62153.0 1515.64   5
   0   2   4 58608.8 714.362   4
   0   2   5 181825. 2857.40   5
   0   2   5 177772. 1412.04   4
   0  -2  -5 179060. 2258.57   1
   0   2   6 31941.6 652.138   4
   0   2   6 32608.2 1316.03   5
   0   2   7 221773. 1864.84   4
   0   2   7 250624. 3883.75   5
   0   2   8 11776.5 909.456   5
   0   2   8 10973.1 441.355   4
   0   2   9 66414.0 2229.35   5
   0   2   9 60801.8 1114.93   4
   0   2  10 10769.9 500.649   4
   0  -2 -10 12090.8 814.465   1
   0   2  10 11648.0 994.071   5
   0   2  11 6021.60 394.733   4
   0  -2 -11 6565.81 640.785   1
   0   2  11 7781.54 864.986   5
   0  -2 -12 40568.0 1683.17   1
   0   2  12 38107.7 1029.58   4
   0   2  12 36954.4 1954.61   5
   0   2  13 8145.07 501.350   4
   0   2  13 8646.88 989.263   5
   0   2  14 11392.2 612.834   4
   0   2  14 11542.2 1185.41   5
   0   2  15-84.7986 254.716   5
   0   2  15 90.6561 81.2820   4
   0   2  16 3193.04 666.482   5
   0   2  16 3137.01 338.379   4
   0   2  17 5.12696 285.428   5
   0   2  18 633.688 350.408   5
   0   2  19 521.234 400.465   5
   0   2  20 322.021 401.072   5
   0   2  21 1261.39 568.132   5
   0  -3  23 1260.07 540.603   5
   0  -3  22-709.297 508.825   5
   0  -3  21 2843.20 721.658   5
   0  -3  20 501.898 231.353   5
   0  -3  20 766.126 317.414   1
   0  -3  19 7823.11 647.805   4
   0  -3  19 8321.05 898.259   1
   0  -3  18 5561.72 699.201   1
   0  -3  18 5097.77 522.941   4
   0  -3  17 5090.23 697.452   1
   0  -3  17 4392.56 459.537   4
   0  -3  16 4475.77 585.890   1
   0  -3  15 3192.48 470.566   1
   0   3 -14 8840.80 732.871   1
   0  -3  14 13004.1 929.270   1
   0  -3  13 9593.62 781.251   1
   0   3 -13 10341.0 767.301   1
   0  -3  12 14874.5 926.946   1
   0  -3  11 8661.53 671.702   1
   0  -3  10 19907.6 923.164   1
   0  -3   9 167.153 190.028   1
   0  -3   8 3082.28 318.658   1
   0  -3   7-5.74472 92.3589   1
   0   3  -6 35.1859 49.7035   1
   0  -3   6 35.4791 54.3867   1
   0  -3   5 64.2414 62.8964   1
   0   3  -5 72.1381 58.1485   1
   0   3  -4 2253.94 175.602   2
   0   3  -4 1814.00 163.944   1
   0  -3   4 2172.11 200.900   1
   0   3  -3 1409.76 128.106   2
   0   3  -3 1384.55 137.183   1
   0  -3   3 1414.10 128.302   2
   0   3  -2 4195.00 216.610   1
   0  -3   2 4387.01 211.925   1
   0  -3   2 4524.90 223.620   2
   0   3  -2 4476.39 216.632   2
   0   3  -1 1792.05 145.906   2
   0  -3   1 2256.48 152.611   5
   0   3  -1 2436.28 153.038   5
   0  -3   1 1814.16 148.808   2
   0  -3   0 2100.62 111.438   3
   0  -3   0 2132.16 177.525   5
   0   3   0 2204.34 164.561   5
   0  -3   0 1926.43 172.556   2
   0   3   0 1796.41 157.672   2
   0   3   1 4597.01 284.137   2
   0  -3  -1 4746.10 306.239   5
   0   3   1 4947.22 297.364   5
   0  -3  -2 7964.26 464.021   5
   0   3   2 7652.45 427.952   5
   0  -3  -3 6035.92 476.849   5
   0   3   3 6324.98 456.554   5
   0  -3  -3 6593.96 227.991   4
   0  -3  -4 5057.40 472.697   5
   0   3   4 4847.05 444.133   5
   0  -3  -4 4934.48 213.323   4
   0  -3  -5 9846.63 584.904   1
   0   3   5 11963.1 746.687   5
   0   3   6 19768.8 1052.52   5
   0   3   7 30274.7 1431.33   5
   0   3   8 2575.91 443.178   5
   0  -3  -9 11804.2 835.671   1
   0   3   9 11101.2 943.576   5
   0   3  10-20.8991 220.383   5
   0  -3 -10-23.7687 122.103   1
   0  -3 -11 680.710 253.596   1
   0   3  11 786.434 312.265   5
   0   3  12 2001.25 501.450   5
   0   3  13-65.8102 243.632   5
   0   3  14 180.668 268.383   5
   0   3  15 817.985 353.605   5
   0   3  16 1692.53 541.366   5
   0   3  17 2831.04 716.228   5
   0   3  18 474.636 360.831   5
   0   3  19 2314.30 679.944   5
   0   3  20 679.478 450.061   5
   0  -4  23-210.699 368.315   5
   0  -4  22-126.926 261.139   1
   0  -4  22-643.020 528.539   5
   0  -4  21 156.539 205.077   1
   0  -4  20-47.9446 178.825   1
   0  -4  19 1815.10 336.892   4
   0  -4  19 2384.22 506.471   1
   0  -4  18 6929.09 805.527   1
   0  -4  17 1754.00 440.285   1
   0  -4  16 36.7677 161.857   1
   0  -4  15 1201.08 322.844   1
   0  -4  14 2412.11 426.702   1
   0   4 -14 3028.40 477.127   1
   0   4 -13 3584.53 474.300   1
   0  -4  13 2936.71 432.509   1
   0  -4  12 5813.29 573.984   1
   0  -4  11 2063.66 311.944   1
   0  -4  10 26924.2 1068.19   1
   0  -4   9 69181.0 1612.62   1
   0  -4   8 206.754 104.454   1
   0   4  -7 153929. 2069.59   1
   0  -4   7 159850. 1969.46   1
   0  -4   6 128495. 1594.46   2
   0   4  -6 138112. 1846.83   1
   0  -4   5 53507.6 953.967   2
   0  -4   5 53175.1 1036.05   1
   0   4  -5 52911.9 935.752   2
   0   4  -4 39068.0 815.522   1
   0  -4   4 40339.1 805.309   1
   0  -4   4 42899.6 819.668   2
   0   4  -3 443967. 2510.75   2
   0  -4   3 439511. 2595.59   2
   0  -4   1 2398.86 194.089   5
   0  -4   1 2890.17 220.148   2
   0   4  -1 2198.61 183.663   2
   0   4  -1 2695.21 189.047   5
   0  -4   0 106541. 1427.67   5
   0  -4   0 103796. 1465.76   2
   0  -4   0 120762. 962.767   3
   0   4   0 112755. 1390.37   5
   0   4   0 113943. 1454.89   2
   0   4   1 61303.0 727.928   3
   0   4   1 59787.1 1178.75   2
   0   4   1 63268.6 1175.94   5
   0   4   2 274465. 2764.85   5
   0  -4  -2 262378. 2948.87   5
   0  -4  -3 99729.6 2026.47   5
   0   4   3 95178.2 1842.90   5
   0  -4  -4 29336.8 1194.90   5
   0  -4  -4 29529.2 559.807   4
   0   4   4 26061.9 1027.85   5
   0  -4  -5 34082.7 1422.19   5
   0  -4  -5 30119.5 577.594   4
   0   4   5 32931.3 1258.63   5
   0   4   6 68902.3 1983.39   5
   0   4   7 201.633 164.884   5
   0   4   8 2575.83 469.947   5
   0  -4  -8 2474.21 360.947   1
   0   4   9 4066.22 605.528   5
   0  -4  -9 3447.59 478.791   1
   0   4  10 16476.8 1229.14   5
   0  -4 -10 17297.9 1080.16   1
   0   4  11 19332.1 1396.38   5
   0  -4 -11 15276.3 1017.64   1
   0   4  12 691.903 363.138   5
   0   4  13 1024.12 427.780   5
   0   4  14 893.904 396.735   5
   0   4  15 1002.59 449.987   5
   0   4  16 1085.83 505.137   5
   0   4  17 551.720 341.095   5
   0   4  18 563.541 394.634   5
   0   4  19 684.879 427.858   5
   0  -5  23-58.4343 220.034   1
   0  -5  23-665.615 564.309   5
   0  -5  22 344.551 257.204   1
   0  -5  21 37.5179 171.577   1
   0  -5  20 10.5904 181.202   1
   0  -5  19-336.983 250.571   1
   0  -5  18 1806.34 467.120   1
   0  -5  17 117.550 178.261   1
   0  -5  16 6599.66 708.075   1
   0  -5  15 2080.14 444.914   1
   0   5 -14 5587.60 607.323   1
   0  -5  14 5549.72 487.908   2
   0  -5  13 5884.47 597.714   1
   0  -5  13 5395.22 462.602   2
   0   5 -13 6158.65 611.078   1
   0  -5  12 12307.1 815.091   1
   0   5 -12 9147.07 678.327   1
   0  -5  11 3958.29 667.249   1
   0  -5  10 4708.15 451.351   1
   0  -5   9 2629.00 317.703   1
   0  -5   8 987.381 241.923   1
   0   5  -8 1682.34 237.074   1
   0  -5   7 17244.2 634.414   2
   0   5  -7 14339.7 613.436   1
   0  -5   6 6961.42 435.847   1
   0  -5   6 7811.86 404.436   2
   0   5  -6 8002.82 411.314   2
   0  -5   5 5694.78 342.608   2
   0   5  -5 5477.40 322.028   2
   0  -5   5 4446.90 300.325   1
   0  -5   4 1628.11 173.867   1
   0   5  -4 1869.05 191.921   2
   0  -5   4 1863.86 193.594   2
   0   5  -4 1901.40 196.223   1
   0  -5   3 241.576 75.2601   1
   0   5  -3 187.476 61.0389   2
   0  -5   3 164.083 63.6692   5
   0  -5   3 232.106 77.3167   2
   0  -5   2 53.5227 55.1701   5
   0  -5   2 7.68570 38.1601   2
   0   5  -2 55.3142 57.7021   5
   0   5  -2 120.101 68.2141   2
   0  -5   1 87.4133 66.9052   2
   0   5  -1 38.6796 63.6616   5
   0  -5   1 85.3008 51.3073   5
   0   5  -1 75.5122 64.8517   2
   0  -5   0 229.000 106.333   5
   0  -5   0 40.6088 55.7442   2
   0   5   0 81.2049 58.8396   5
   0   5   0 139.379 87.0089   2
   0  -5   0 93.7268 40.9328   3
   0   5   1 811.346 183.098   5
   0  -5  -1 644.887 152.194   5
   0   5   1 711.768 90.7210   3
   0   5   1 600.951 156.860   2
   0   5   2 2182.70 252.900   2
   0  -5  -2 2049.11 286.272   5
   0   5   2 2496.82 282.657   5
   0  -5  -3 10289.0 689.628   5
   0   5   3 9759.65 614.663   5
   0   5   4 49.7782 174.663   5
   0  -5  -4 290.313 61.4309   4
   0  -5  -4 129.365 89.6041   5
   0  -5  -5 15439.5 440.675   4
   0  -5  -5 17288.2 1068.21   5
   0   5   5 16753.4 917.128   5
   0  -5  -6 2830.98 192.321   4
   0   5   6 2342.30 349.767   5
   0  -5  -7 13879.6 816.925   1
   0   5   7 13981.7 958.208   5
   0  -5  -8 8307.23 697.498   1
   0   5   8 9952.32 853.162   5
   0   5   9 5885.27 728.529   5
   0  -5  -9 5837.00 614.935   1
   0  -5 -10 9154.26 815.595   1
   0   5  10 8810.04 904.243   5
   0   5  11 4755.52 717.001   5
   0   5  12 9109.23 1034.61   5
   0   5  13 2735.47 602.110   5
   0   5  14 5033.31 829.237   5
   0   5  15 1411.02 488.013   5
   0   5  16 3959.16 786.107   5
   0   5  17 883.156 446.654   5
   0   5  18 872.457 432.608   5
   0   5  19 81.1894 229.490   5
   0  -6  23 306.887 176.366   1
   0  -6  22 364.909 272.077   1
   0  -6  21 1343.06 444.572   1
   0  -6  20-256.320 236.738   1
   0  -6  19 4325.05 807.701   1
   0  -6  18 5924.04 769.591   1
   0  -6  17 6782.59 783.061   1
   0  -6  16 22533.9 1409.84   1
   0  -6  15 6286.45 649.504   1
   0  -6  14 30818.3 1146.80   2
   0  -6  14 41152.3 1600.65   1
   0   6 -13 5146.04 677.707   1
   0  -6  13 6262.84 509.220   2
   0  -6  12 55783.6 1697.39   1
   0   6 -12 35793.7 1333.72   1
   0  -6  11 11926.2 759.705   1
   0   6 -11 11624.9 698.178   1
   0   6 -10 61455.1 1531.85   1
   0  -6  10 62681.4 1564.57   1
   0  -6   9 1667.65 336.016   1
   0   6  -9 4688.66 413.392   1
   0   6  -8 13688.0 655.829   1
   0  -6   8 14652.5 639.877   2
   0  -6   8 12546.8 644.978   1
   0   6  -7 112924. 1793.09   1
   0   6  -7 109598. 1619.93   2
   0  -6   7 106630. 1641.40   2
   0   6  -6 6336.15 429.253   1
   0  -6   6 6292.17 395.404   2
   0  -6   6 5674.80 393.680   1
   0   6  -6 6375.45 387.358   2
   0  -6   5 250513. 2430.17   2
   0   6  -5 257569. 2344.33   2
   0  -6   4 55568.9 1069.50   1
   0  -6   4 56725.0 1055.95   5
   0  -6   4 54684.7 1129.74   2
   0   6  -4 55049.9 1071.05   2
   0  -6   3 117190. 1667.59   2
   0   6  -3 122772. 1606.35   2
   0  -6   3 119003. 1554.02   5
   0   6  -2 201731. 2060.61   2
   0   6  -2 204870. 1990.80   5
   0  -6   2 200888. 2222.71   2
   0  -6   2 204598. 2116.99   5
   0  -6   1 21385.9 738.554   5
   0  -6   1 23724.5 516.306   3
   0  -6   1 23940.1 797.656   2
   0   6  -1 21761.4 707.238   2
   0   6  -1 22392.2 692.270   5
   0  -6   0 41324.9 1117.26   2
   0   6   0 43422.9 1050.11   5
   0   6   0 44480.2 1097.93   2
   0  -6   0 43308.9 1131.02   5
   0   6   1 6505.92 279.104   3
   0   6   1 6401.97 445.354   2
   0  -6  -1 5954.83 466.137   5
   0   6   1 6219.56 425.727   5
   0   6   2 9167.51 364.182   3
   0   6   2 9645.78 588.855   5
   0   6   2 10231.4 613.654   2
   0  -6  -2 9162.05 622.633   5
   0   6   3 71536.5 1706.30   2
   0  -6  -3 75278.8 2001.28   5
   0   6   4 4336.41 435.752   5
   0  -6  -4 4384.37 516.845   5
   0  -6  -5 87445.8 1137.36   4
   0   6   5 73472.2 2004.21   5
   0   6   6 74.4835 185.944   5
   0  -6  -6 301.289 73.2063   4
   0  -6  -7 48726.1 1632.82   1
   0   6   7 60437.3 2032.93   5
   0   6   8 4040.56 529.759   5
   0  -6  -8 5136.38 551.187   1
   0   6   9 7748.30 804.745   5
   0  -6  -9 8452.22 744.962   1
   0   6  10 7856.32 846.672   5
   0   6  11 7767.82 897.567   5
   0   6  12 9442.04 1034.65   5
   0   6  13 593.967 286.363   5
   0   6  14 2728.20 571.604   5
   0   6  15 943.846 359.434   5
   0   6  16-290.629 354.113   5
   0   6  17-624.127 456.790   5
   0   6  18-666.491 457.905   5
   0  -7  24 517.688 363.646   1
   0  -7  23 1645.14 471.602   1
   0  -7  22 911.124 366.811   1
   0  -7  21 3049.06 626.024   1
   0  -7  20 3584.40 626.856   1
   0  -7  19 5625.17 749.958   1
   0  -7  18-56.8542 170.210   1
   0  -7  17 4452.66 765.571   1
   0  -7  16 11535.6 888.229   1
   0  -7  15 4758.52 587.588   1
   0  -7  14 3057.14 376.095   2
   0   7 -14 4688.99 513.373   1
   0  -7  14 3910.64 519.793   1
   0  -7  13 2197.62 360.796   1
   0   7 -13 1581.80 310.286   1
   0  -7  13 1987.37 295.346   2
   0   7 -12 3951.76 420.613   1
   0  -7  12 3268.95 361.372   2
   0  -7  12 3961.60 448.416   1
   0  -7  11 525.915 182.620   1
   0   7 -11 825.981 192.349   1
   0   7 -10 348.796 119.840   1
   0  -7  10 347.282 120.025   1
   0   7  -9-43.4828 57.4789   1
   0  -7   9 8.81246 72.5733   2
   0  -7   9-118.274 136.022   1
   0  -7   8 1087.99 193.966   2
   0   7  -8 1238.81 202.403   1
   0   7  -8 1288.34 203.163   2
   0  -7   8 1183.29 211.248   1
   0  -7   7 827.469 176.730   2
   0   7  -7 1029.25 198.604   2
   0   7  -7 1181.69 224.923   1
   0  -7   7 988.932 208.210   1
   0   7  -6 3200.43 297.388   1
   0  -7   6 2200.85 249.139   1
   0  -7   6 2562.65 275.974   2
   0   7  -6 2816.22 255.141   2
   0   7  -5 2214.87 247.311   1
   0   7  -5 1962.05 238.082   2
   0  -7   5 1774.95 223.978   1
   0  -7   5 1930.47 228.166   2
   0   7  -4 2948.80 278.474   2
   0  -7   4 3292.10 286.678   5
   0  -7   4 3508.37 310.362   2
   0   7  -3 624.867 104.963   2
   0  -7   3 876.038 148.042   5
   0  -7   3 777.048 152.861   2
   0  -7   2 8363.24 501.721   2
   0  -7   2 9661.85 518.281   5
   0   7  -2 10396.1 495.176   5
   0   7  -2 8791.76 477.194   2
   0   7  -1 2389.48 260.596   2
   0  -7   1 2317.84 272.259   2
   0  -7   1 2558.62 286.797   5
   0  -7   1 2391.14 179.094   3
   0   7  -1 2395.70 261.944   5
   0   7   0 1687.72 248.112   2
   0  -7   0 1518.27 221.612   2
   0   7   0 1470.61 213.283   5
   0  -7   0 1394.37 233.004   5
   0   7   1 55.4186 35.8131   3
   0  -7  -1-30.3034 86.4409   5
   0   7   1 71.4816 85.6551   2
   0   7   2 12905.3 450.761   3
   0  -7  -2 12191.9 774.310   5
   0   7   2 11745.1 680.680   2
   0   7   2 12534.1 706.795   5
   0   7   3 6324.24 527.269   5
   0   7   3 5683.93 316.882   3
   0  -7  -3 6666.67 614.437   5
   0   7   3 7010.59 558.744   2
   0   7   4 11389.1 760.979   5
   0   7   4 14013.5 822.451   2
   0  -7  -5 5278.25 286.656   4
   0   7   5 4908.40 526.682   5
   0  -7  -6 1551.04 153.285   4
   0   7   6 1247.56 301.310   5
   0  -7  -6 1153.97 313.841   5
   0  -7  -7 8631.06 359.574   4
   0   7   7 7948.86 735.995   5
   0  -7  -7 9484.95 729.638   1
   0  -7  -7 8637.22 907.731   5
   0  -7  -8 1157.96 283.192   1
   0   7   8 1137.39 261.034   5
   0   7   9 654.237 189.444   5
   0   7  10 2641.52 502.224   5
   0   7  11-360.273 300.278   5
   0   7  12 990.595 348.404   5
   0   7  13 731.943 259.949   5
   0   7  14 91.0059 262.710   5
   0   7  15 981.312 371.725   5
   0   7  16-359.584 427.966   5
   0   7  17 434.685 299.088   5
   0   7  18 19.6432 319.507   5
   0  -8  24 59.7698 160.132   1
   0  -8  23-173.129 241.196   1
   0  -8  22 269.932 249.129   1
   0  -8  21 244.665 193.122   1
   0  -8  20 3948.80 679.830   1
   0  -8  19 1109.75 350.682   1
   0  -8  18 1293.70 400.807   1
   0  -8  17 2421.49 445.547   1
   0  -8  16-380.065 278.043   1
   0  -8  15 8147.13 805.987   1
   0  -8  14 5330.92 505.975   2
   0   8 -14 5628.17 613.171   1
   0  -8  14 6511.16 647.540   1
   0  -8  13 554.505 177.038   2
   0  -8  13 749.988 227.552   1
   0   8 -13 834.159 230.539   1
   0  -8  12 1231.28 287.143   1
   0  -8  12 1035.66 209.634   2
   0   8 -12 477.619 207.460   1
   0  -8  11 5918.37 485.063   2
   0   8 -11 5684.25 500.481   1
   0   8 -10 22709.1 966.574   1
   0  -8  10 19254.5 899.497   1
   0  -8  10 21419.4 896.462   2
   0   8  -9 105543. 1826.79   2
   0  -8   9 89492.4 1889.74   1
   0  -8   9 94794.3 1885.71   2
   0   8  -9 99749.1 1987.69   1
   0  -8   8 18046.2 803.965   1
   0   8  -8 16301.5 765.390   1
   0   8  -8 16472.4 703.943   2
   0  -8   8 15351.3 713.341   2
   0   8  -7 264363. 2738.16   2
   0  -8   7 255026. 2879.60   2
   0   8  -7 255392. 2839.03   1
   0   8  -6 32328.4 941.646   2
   0  -8   6 29496.7 957.439   2
   0  -8   5 229509. 2537.70   1
   0   8  -5 225106. 2481.74   2
   0  -8   5 224648. 2666.56   2
   0  -8   4 74096.8 1482.30   1
   0  -8   4 72869.0 1412.75   5
   0   8  -4 73415.8 1433.73   2
   0   8  -3 1746.47 206.579   5
   0  -8   3 1725.92 224.304   5
   0  -8   3 1689.55 219.935   2
   0   8  -3 1813.87 232.274   2
   0   8  -2 61866.6 1290.87   5
   0  -8   2 61801.2 1417.63   5
   0   8  -1 191094. 2471.83   2
   0   8  -1 194255. 2359.63   5
   0  -8   1 183858. 2577.95   5
   0  -8   1 187450. 2659.92   2
   0   8   0 10638.0 612.265   2
   0  -8   0 11598.8 692.027   5
   0   8   0 11402.9 613.431   5
   0   8   1 54130.5 1449.65   5
   0  -8  -1 58918.2 1705.98   5
   0   8   2 651.622 144.018   5
   0   8   2 946.918 132.056   3
   0  -8  -2 772.524 219.046   5
   0   8   2 1035.51 225.286   2
   0   8   3 20103.4 643.066   3
   0   8   3 20907.5 1026.22   2
   0   8   3 21603.8 1022.77   5
   0   8   4 10632.4 482.262   3
   0   8   4 9391.25 730.600   2
   0   8   4 10666.7 760.265   5
   0   8   5 5648.87 583.626   2
   0  -8  -5 6508.12 734.662   5
   0  -8  -5 6488.22 340.430   4
   0   8   5 6340.41 621.354   5
   0  -8  -6 115.684 112.680   5
   0  -8  -6 51.0887 47.3298   4
   0   8   6 178.760 172.010   5
   0  -8  -7-331.579 302.458   5
   0  -8  -7 21.3357 111.964   1
   0   8   7-42.6732 201.959   5
   0  -8  -7 90.5529 47.5190   4
   0   8   8-222.503 264.320   5
   0   8   9 2531.20 455.933   5
   0   8  10 14043.9 1177.31   5
   0   8  11 5221.19 729.961   5
   0   8  12 3238.41 624.996   5
   0   8  13-88.6332 253.326   5
   0   8  14 190.602 237.765   5
   0   8  15 9.77820 249.541   5
   0   8  16-790.589 395.530   5
   0   8  17-83.2994 284.688   5
   0  -9  24 345.313 286.738   1
   0  -9  23 306.142 243.250   1
   0  -9  22 492.625 314.251   1
   0  -9  21 402.244 268.551   1
   0  -9  20 83.4659 172.206   1
   0  -9  19 373.807 248.818   1
   0  -9  18 2496.05 482.019   1
   0  -9  17 35.4968 182.591   1
   0  -9  16 296.987 237.547   1
   0  -9  15-48.3637 157.848   1
   0  -9  14 5472.54 557.772   1
   0  -9  14 4321.82 453.369   2
   0   9 -14 4799.68 537.504   1
   0  -9  13 1228.83 263.278   2
   0  -9  13 1608.86 298.712   1
   0   9 -13 1597.75 285.837   1
   0  -9  12 1432.95 286.143   1
   0   9 -12 867.106 224.145   1
   0  -9  12 1145.82 232.905   2
   0  -9  11 2515.85 351.861   1
   0  -9  11 2208.49 323.325   2
   0   9 -11 2969.38 372.612   1
   0  -9  10 1542.79 289.178   1
   0   9 -10 1786.24 287.712   1
   0   9 -10 1410.59 259.231   2
   0  -9  10 1359.82 249.927   2
   0   9  -9 1568.81 246.720   2
   0  -9   9 1735.43 258.767   2
   0   9  -9 2065.38 285.540   1
   0  -9   9 2125.49 295.884   1
   0   9  -8 6211.40 465.671   1
   0  -9   8 4842.65 423.977   2
   0   9  -8 4988.33 404.447   2
   0   9  -7 9124.44 530.134   2
   0  -9   7 7780.50 515.869   1
   0  -9   7 10107.1 606.970   2
   0   9  -6 534.266 156.135   2
   0  -9   6 564.426 151.045   1
   0  -9   6 410.617 121.583   5
   0  -9   6 514.177 138.386   2
   0   9  -5 58.6397 67.1926   2
   0  -9   5 42.3527 84.2609   1
   0  -9   5 162.582 94.0972   2
   0  -9   5 111.227 68.6307   5
   0  -9   4 153.391 107.305   1
   0  -9   4 83.0117 60.1285   2
   0   9  -4 1.78225 101.498   2
   0  -9   4 201.138 102.261   5
   0   9  -3 1152.29 214.423   2
   0   9  -3 1328.29 203.237   5
   0  -9   3 1352.40 240.534   2
   0  -9   3 1332.63 210.911   5
   0   9  -2 94.3753 94.7011   5
   0  -9   2 40.3055 66.2689   2
   0  -9   2-113.188 118.329   5
   0   9  -2-25.7045 101.014   2
   0  -9   2 16.5855 45.6143   3
   0   9  -1 818.109 191.838   5
   0   9  -1 1064.71 203.261   2
   0  -9   1 811.020 121.041   3
   0  -9   1 814.634 196.589   5
   0  -9   1 752.954 173.054   2
   0   9   0 9127.73 595.227   5
   0  -9   0 9204.16 669.755   5
   0   9   0 9027.56 607.473   2
   0   9   1 4443.56 462.689   2
   0   9   1 4928.49 449.716   5
   0   9   2 3193.44 378.001   5
   0   9   2 3745.66 434.219   2
   0   9   2 3916.50 269.883   3
   0   9   3 11150.2 753.797   5
   0   9   3 11199.6 778.406   2
   0   9   3 10323.1 468.703   3
   0  -9  -3 11081.8 903.134   5
   0  -9  -4 4308.60 594.559   5
   0   9   4 4302.58 499.635   5
   0   9   4 4263.49 313.025   3
   0   9   4 3464.09 459.071   2
   0   9   5 17125.4 665.208   3
   0   9   5 16082.5 1033.97   2
   0   9   5 18455.2 1095.50   5
   0   9   6 5950.87 666.513   5
   0   9   6 5473.59 604.828   2
   0  -9  -6 5303.01 315.544   4
   0  -9  -6 5688.60 752.245   5
   0   9   7 2715.79 458.086   2
   0  -9  -7 3120.71 233.146   4
   0   9   7 2796.38 462.582   5
   0  -9  -7 2914.47 553.338   5
   0   9   8 47.6174 147.707   5
   0   9   9 3832.33 612.721   5
   0   9  10 4442.01 653.090   5
   0   9  11 2928.85 542.252   5
   0   9  12 1973.01 491.340   5
   0   9  13 202.235 217.077   5
   0   9  14 1011.99 373.778   5
   0   9  15-320.688 276.464   5
   0   9  16-101.973 202.566   5
   0 -10  24 169.582 233.394   1
   0 -10  23 1178.11 410.522   1
   0 -10  22 583.376 341.865   1
   0 -10  21 2041.46 544.021   1
   0 -10  20 1102.33 381.522   1
   0 -10  19 1190.44 366.243   1
   0 -10  18 9770.01 920.608   1
   0 -10  17 11865.5 976.715   1
   0 -10  16 70.2100 180.421   1
   0 -10  15 4222.40 524.342   1
   0  10 -14 18920.0 1081.97   1
   0 -10  14 21668.6 1057.26   2
   0 -10  14 20929.8 1060.17   1
   0 -10  13 4574.41 508.974   1
   0 -10  13 5042.80 514.152   2
   0  10 -13 4646.45 505.077   1
   0 -10  12 6928.59 573.448   2
   0 -10  12 7713.20 629.473   1
   0  10 -12 8106.08 680.138   1
   0 -10  11 664.683 208.723   1
   0  10 -11 748.741 210.782   2
   0 -10  11 817.938 207.174   2
   0  10 -11 606.469 191.553   1
   0  10 -10 7520.36 540.625   2
   0 -10  10 7694.27 587.401   2
   0 -10  10 3078.61 436.772   1
   0  10 -10 4427.22 548.418   1
   0 -10   9 7990.31 566.370   1
   0 -10   9 6885.24 538.315   2
   0  10  -9 6366.23 521.703   1
   0  10  -9 6489.78 487.068   2
   0 -10   8 13400.1 717.599   1
   0  10  -8 14972.9 720.478   2
   0 -10   8 15835.4 807.391   2
   0 -10   7 42735.7 1339.48   2
   0  10  -7 44320.3 1207.19   2
   0  10  -6 8729.73 542.833   2
   0 -10   6 8360.82 548.305   1
   0 -10   6 8108.33 579.796   2
   0  10  -5 47498.8 1269.58   2
   0 -10   5 51402.6 1316.34   1
   0 -10   5 49974.3 1323.06   5
   0 -10   4 4870.28 429.094   5
   0  10  -4 4711.26 399.050   2
   0 -10   4 5092.89 454.058   2
   0 -10   4 4392.40 411.160   1
   0  10  -3 4010.44 371.897   5
   0 -10   3 3564.92 398.100   2
   0  10  -3 3993.02 389.549   2
   0 -10   3 3950.26 396.774   5
   0  10  -2 234.307 122.688   5
   0 -10   2 223.278 71.3915   3
   0 -10   2 97.1928 83.8543   2
   0  10  -2 153.925 80.5086   2
   0 -10   1 4078.88 459.904   2
   0  10  -1 4868.19 434.577   5
   0  10  -1 4558.39 414.822   2
   0 -10   1 4897.66 298.227   3
   0  10   0 63822.2 1703.02   2
   0  10   0 73269.7 1717.44   5
   0  10   1 2771.16 386.755   2
   0  10   1 2404.62 325.715   5
   0  10   2 4363.30 469.506   5
   0 -10  -2 5163.61 614.098   5
   0  10   2 4318.17 496.270   2
   0  10   3 18250.7 1055.30   2
   0 -10  -3 21525.6 1294.05   5
   0  10   3 20133.7 1054.27   5
   0  10   3 19048.8 647.703   3
   0  10   4 3524.62 477.641   2
   0 -10  -4 4009.78 587.588   5
   0  10   4 3409.88 288.283   3
   0  10   4 3623.10 457.523   5
   0  10   5 31325.2 1433.38   5
   0  10   5 30849.7 930.547   3
   0  10   5 35308.3 1557.91   2
   0 -10  -5 34930.2 1864.75   5
   0 -10  -6 2559.72 507.779   5
   0  10   6 2551.23 440.550   2
   0 -10  -6 2723.69 244.217   4
   0  10   6 3155.27 309.840   3
   0  10   6 3248.33 497.563   5
   0 -10  -7 1607.75 174.290   4
   0  10   7 1264.56 213.733   3
   0  10   7 885.686 248.371   2
   0  10   7 1341.56 358.836   5
   0  10   8 1543.12 385.472   2
   0  10   8 1855.02 444.097   5
   0  10   9 1878.16 400.959   2
   0  10   9 2450.77 490.431   5
   0  10  10 227.710 208.891   5
   0  10  10-130.186 239.563   2
   0  10  11 777.660 327.478   5
   0  10  12 312.481 264.046   5
   0  10  13 308.425 244.585   5
   0  10  14 21.5131 169.637   5
   0  10  15-45.5215 203.250   5
   0 -11  24 1431.29 495.961   1
   0 -11  23 1422.23 477.769   1
   0 -11  22 402.711 264.236   1
   0 -11  21 2221.59 465.388   1
   0 -11  20 1909.96 439.889   1
   0 -11  19 2860.23 545.689   1
   0 -11  18 3654.56 555.250   1
   0 -11  17 5290.83 654.402   1
   0 -11  16 1140.50 305.832   1
   0 -11  15-27.2537 120.507   1
   0 -11  14 128.062 153.542   1
   0  11 -14 48.5366 123.487   1
   0 -11  13 88.9104 117.240   2
   0 -11  13-66.7499 145.242   1
   0  11 -13 29.2217 99.4287   1
   0 -11  12 365.122 171.215   1
   0  11 -12 73.0430 99.7521   1
   0 -11  12 179.074 102.910   2
   0  11 -12 346.414 176.903   2
   0  11 -11 209.869 135.866   1
   0  11 -11 376.290 183.304   2
   0 -11  11 256.845 149.555   1
   0 -11  11 207.363 131.823   2
   0  11 -10 485.508 171.103   2
   0 -11  10 387.076 137.754   1
   0  11 -10 377.640 159.951   1
   0 -11  10 359.350 120.721   2
   0  11  -9 871.136 212.247   1
   0 -11   9 557.037 170.093   1
   0  11  -9 777.327 189.342   2
   0 -11   9 615.851 178.429   2
   0 -11   8 1362.89 265.793   2
   0 -11   8 1459.00 261.896   1
   0  11  -8 1228.73 222.397   2
   0  11  -7 5018.48 441.869   2
   0 -11   7 6947.07 534.317   1
   0 -11   7 5997.79 518.067   2
   0  11  -6 171.224 105.525   2
   0 -11   6-18.6788 105.818   2
   0 -11   6 87.1842 108.323   1
   0 -11   5 2527.58 347.853   2
   0  11  -5 2708.49 322.694   2
   0  11  -4 11035.8 650.459   2
   0 -11   4 9217.47 632.174   1
   0 -11   4 11044.7 739.332   2
   0 -11   3 1225.31 170.238   3
   0 -11   3 1275.96 263.444   2
   0  11  -3 1372.36 252.916   2
   0  11  -3 1337.96 235.317   5
   0 -11   2 3980.02 287.511   3
   0  11  -2 3299.54 370.962   2
   0  11  -2 3973.94 391.046   5
   0 -11   2 3454.22 423.074   2
   0  11  -1 599.981 166.764   2
   0  11  -1 1137.06 244.859   5
   0 -11   1 710.159 200.988   2
   0 -11   0 5957.26 622.355   5
   0  11   0 5367.47 524.864   2
   0  11   0 6209.04 534.630   5
   0 -11  -1 3915.59 509.832   5
   0  11   1 3668.97 450.538   2
   0  11   1 3991.28 440.618   5
   0  11   2 9601.18 733.675   5
   0 -11  -2 9382.16 861.812   5
   0  11   2 9436.75 745.363   2
   0  11   3-166.622 171.212   5
   0  11   3 39.3631 133.374   2
   0 -11  -3 68.8898 156.166   5
   0 -11  -4 2612.45 510.477   5
   0  11   4 2793.64 462.792   2
   0  11   4 2493.11 384.948   5
   0  11   4 2726.99 262.180   3
   0  11   5 2987.37 474.970   5
   0  11   5 2854.91 447.756   2
   0  11   5 2989.07 288.880   3
   0 -11  -5 3104.43 576.447   5
   0  11   6-177.477 231.463   2
   0 -11  -6 37.3928 52.5313   4
   0  11   6 70.1064 66.6052   3
   0 -11  -7 619.703 110.966   4
   0  11   7 801.266 295.451   5
   0  11   7 538.162 151.153   3
   0  11   7 706.768 241.183   2
   0  11   8 1081.80 365.919   5
   0  11   8 664.709 281.798   2
   0  11   8 817.899 183.598   3
   0  11   9 514.607 301.152   5
   0  11   9 592.802 175.039   3
   0  11   9 515.373 232.507   2
   0  11  10 1598.83 415.533   2
   0  11  10 1721.33 280.507   3
   0  11  10 2107.61 465.416   5
   0  11  11-45.6587 244.297   2
   0  11  11 305.183 267.174   5
   0  11  11-112.534 117.860   3
   0  11  12 2462.18 572.719   5
   0  11  12 2212.50 538.759   2
   0  11  13 540.466 356.969   5
   0  11  13 52.8958 178.319   2
   0  11  14 226.576 233.642   2
   0  11  14 717.288 417.479   5
   0  11  15 301.061 348.796   5
   0  11  15-958.834 420.486   2
   0 -12  24 1376.90 480.476   1
   0 -12  23 145.769 255.717   1
   0 -12  22 257.394 236.727   1
   0 -12  21 782.787 343.144   1
   0 -12  20 191.724 198.631   1
   0 -12  19 148.927 218.229   1
   0 -12  18 1625.03 402.810   1
   0 -12  17 3346.46 532.854   1
   0 -12  16 18540.7 1142.53   1
   0 -12  15 1765.61 345.705   1
   0 -12  14 16233.6 1019.75   1
   0 -12  13 833.525 252.345   1
   0  12 -13 1197.07 290.488   2
   0 -12  13 860.458 232.075   2
   0  12 -13 777.677 248.728   1
   0  12 -12 21062.1 1000.34   2
   0 -12  12 18057.5 1032.09   1
   0 -12  12 20953.5 1091.13   2
   0 -12  11 3876.72 450.417   2
   0  12 -11 4049.70 497.551   1
   0 -12  11 4773.85 487.395   1
   0  12 -11 3877.36 415.077   2
   0 -12  10 11254.4 780.673   2
   0  12 -10 12554.9 721.591   2
   0 -12  10 11189.2 715.577   1
   0 -12   9 19195.8 920.676   5
   0  12  -9 19827.3 909.624   2
   0 -12   9 20847.1 1036.67   2
   0 -12   8 20795.4 1035.12   2
   0  12  -8 20429.6 902.127   2
   0 -12   7 94336.1 2176.03   2
   0  12  -7 91320.1 1936.24   2
   0 -12   7 96113.8 2045.84   5
   0 -12   6 5107.96 4876.09   1
   0 -12   6 4630.84 5085.29   2
   0  12  -6 5925.88 5359.97   2
   0 -12   6 5017.01 4971.31   5
   0 -12   5 6637.09 553.402   5
   0  12  -5 6401.21 515.826   2
   0 -12   5 8497.15 655.382   2
   0 -12   5 7894.95 584.958   1
   0 -12   4 12506.3 785.454   5
   0  12  -4 11296.8 689.075   2
   0 -12   4 11269.6 766.733   2
   0 -12   3 8182.03 660.899   5
   0  12  -3 8424.84 580.121   5
   0  12  -3 8497.01 607.579   2
   0 -12   3 8536.05 690.175   2
   0 -12   3 8780.36 457.255   3
   0  12  -2 274.750 132.687   2
   0 -12   2 148.498 92.7270   2
   0 -12   2 187.285 60.3101   3
   0  12  -2 198.219 111.051   5
   0 -12   2 108.293 114.754   5
   0  12  -1 5098.37 516.059   5
   0  12  -1 4059.36 455.141   2
   0 -12   1 5024.24 564.025   5
   0  12   0 2931.52 390.711   5
   0 -12   0 2681.10 436.105   5
   0  12   0 2661.33 385.808   2
   0 -12  -1 3466.54 518.793   5
   0  12   1 3412.88 440.227   5
   0  12   1 2501.16 391.546   2
   0  12   2 6485.52 607.536   5
   0  12   2 7142.55 665.865   2
   0 -12  -2 7076.50 783.432   5
   0  12   3 7986.87 774.455   2
   0  12   3 8914.97 746.009   5
   0 -12  -3 9442.79 960.893   5
   0  12   4 1546.21 350.034   2
   0  12   4 749.249 222.116   5
   0  12   5 5771.16 399.854   3
   0  12   5 5833.90 628.953   5
   0  12   5 5958.97 677.603   2
   0  12   6 3687.92 346.160   3
   0 -12  -6 3824.71 301.970   4
   0  12   6 3346.84 493.169   5
   0  12   6 3651.34 583.594   2
   0  12   7 656.530 257.141   2
   0 -12  -7 497.607 106.098   4
   0  12   7 568.243 141.547   3
   0  12   7 1035.78 328.325   5
   0  12   8 641.569 172.848   3
   0  12   8 1214.40 368.107   5
   0  12   8 754.989 281.809   2
   0  12   9 390.816 219.468   2
   0  12   9 625.552 163.350   3
   0  12  10 1790.59 451.604   5
   0  12  10 993.628 344.273   2
   0  12  11-170.872 244.666   2
   0  12  11 400.416 326.533   5
   0  12  12 641.957 297.587   2
   0  12  12 1351.10 451.935   5
   0  12  13 554.928 392.098   5
   0  12  13 0.44133 205.901   2
   0  12  14 267.937 262.947   5
   0  12  14-310.926 267.349   2
   0 -13  24 276.836 258.692   1
   0 -13  23 951.990 353.264   1
   0 -13  22-42.7007 195.435   1
   0 -13  21 368.886 224.295   1
   0 -13  20-39.7056 157.166   1
   0 -13  19 504.803 283.397   1
   0 -13  18 92.0627 204.451   1
   0 -13  17 599.619 254.650   1
   0 -13  16 2334.72 403.354   1
   0 -13  15 140.111 195.354   1
   0 -13  14 500.749 236.602   1
   0  13 -13 511.744 223.823   2
   0  13 -13 314.705 169.814   1
   0 -13  13 332.856 199.103   1
   0  13 -12 62.4268 114.480   1
   0 -13  12-227.841 171.281   2
   0  13 -12-1.05147 115.057   2
   0 -13  12-0.17262 125.330   1
   0 -13  11 66.1855 106.764   1
   0  13 -11 57.5814 101.083   2
   0 -13  11-78.3315 133.274   2
   0 -13  10 56.6265 78.2597   5
   0  13 -10-9.58735 196.506   2
   0 -13  10 33.6190 184.441   2
   0 -13  10 128.419 137.709   1
   0 -13   9 54.3221 93.6742   5
   0  13  -9-37.2883 115.505   2
   0 -13   9-13.9162 91.6957   2
   0 -13   9 89.1645 116.808   1
   0  13  -8 271.090 163.648   2
   0 -13   8 137.956 127.943   1
   0 -13   8 195.612 160.222   5
   0 -13   8 23.0979 98.4798   2
   0  13  -7 1588.62 290.566   2
   0 -13   7 1377.83 272.544   5
   0 -13   7 1187.76 244.731   2
   0 -13   7 1086.25 252.000   1
   0 -13   6 953.829 201.987   1
   0 -13   6 458.743 141.646   2
   0  13  -6 791.220 210.454   2
   0 -13   6 854.910 211.289   5
   0 -13   5 63.5159 97.6334   5
   0 -13   5 219.311 151.753   2
   0  13  -5-83.2077 161.561   2
   0 -13   5-102.676 161.521   1
   0 -13   4 2559.92 376.780   5
   0 -13   4 2624.03 411.483   2
   0  13  -4 2447.51 317.399   2
   0 -13   4 3018.96 297.149   3
   0 -13   3 447.836 186.754   2
   0  13  -3 389.363 170.043   2
   0  13  -3 547.686 163.223   5
   0 -13   3 383.834 97.0365   3
   0 -13   3 686.141 222.986   5
   0 -13   2 689.237 236.927   5
   0  13  -2 711.960 219.599   5
   0 -13   2 673.006 194.750   2
   0  13  -2 669.186 231.357   2
   0  13  -1 347.721 180.228   5
   0 -13   1 241.106 125.459   5
   0  13  -1 185.758 143.515   2
   0 -13   0 3687.19 532.909   5
   0  13   0 3916.16 475.780   2
   0  13   0 3935.93 466.645   5
   0 -13  -1 1573.21 316.951   5
   0  13   1 1521.44 307.656   2
   0  13   1 1770.95 333.325   5
   0  13   2 2981.87 448.094   5
   0 -13  -2 3840.02 611.826   5
   0  13   2 2923.89 437.339   2
   0  13   3 5206.42 649.521   2
   0  13   3 5426.80 607.118   5
   0  13   4 968.509 316.634   2
   0  13   4 455.596 186.000   5
   0  13   5 1691.82 407.815   2
   0  13   5 1875.85 364.852   5
   0  13   6 2862.26 526.982   2
   0 -13  -6 2226.22 239.006   4
   0  13   6 1878.95 387.378   5
   0  13   6 2420.02 268.319   3
   0  13   7 3297.85 565.383   2
   0  13   7 2514.76 461.470   5
   0  13   7 2867.45 315.245   3
   0 -13  -7 2907.41 239.582   4
   0  13   8 687.057 240.440   2
   0  13   8 1113.72 208.441   3
   0  13   8 589.515 238.168   5
   0  13   9 2462.98 513.038   5
   0  13   9 1873.68 456.774   2
   0  13  10 0.35177 171.530   2
   0  13  10 1002.19 379.304   5
   0  13  11 434.248 282.629   2
   0  13  11 1228.27 453.592   5
   0  13  12 646.031 342.709   2
   0  13  12 883.414 374.443   5
   0  13  13-306.876 268.086   2
   0  13  13 343.737 291.415   5
   0 -14  24 562.772 343.006   1
   0 -14  23 3189.29 629.561   1
   0 -14  22-305.772 282.775   1
   0 -14  21 2575.32 571.047   1
   0 -14  20 14.4400 186.674   1
   0 -14  19 3464.38 590.235   1
   0 -14  18 425.109 252.658   1
   0 -14  17 7525.70 730.751   1
   0 -14  16 311.307 222.729   1
   0 -14  15 8583.79 773.287   1
   0 -14  14 3620.79 509.043   1
   0  14 -14 3279.02 463.700   2
   0  14 -13-112.690 159.658   2
   0 -14  13 58.8950 128.916   1
   0 -14  12 1222.71 276.446   2
   0  14 -12 1375.32 280.914   2
   0 -14  12 1167.35 255.703   1
   0 -14  11 3288.88 461.120   2
   0 -14  11 3724.89 451.358   1
   0 -14  11 3409.27 418.174   5
   0  14 -11 3285.47 408.533   2
   0 -14  10 2752.07 417.747   2
   0 -14  10 2500.69 360.564   5
   0  14 -10 1985.28 320.554   2
   0 -14  10 2172.40 349.276   1
   0 -14   9 352.476 137.211   5
   0  14  -9 310.832 168.582   2
   0 -14   9 335.726 159.011   2
   0 -14   9 103.576 115.943   1
   0  14  -8 13514.3 798.198   2
   0 -14   8 16510.3 924.914   5
   0 -14   8 14953.8 946.529   2
   0 -14   7 81452.9 2263.22   2
   0 -14   7 77870.4 2059.19   5
   0  14  -7 78174.8 1930.15   2
   0 -14   6 6050.41 587.970   5
   0 -14   6 7151.25 582.024   1
   0 -14   6 6887.56 645.071   2
   0  14  -6 5577.81 519.586   2
   0 -14   5-59.7507 147.672   5
   0 -14   5 452.090 132.761   3
   0 -14   5 309.268 117.577   1
   0  14  -5 266.493 120.782   2
   0 -14   5 456.789 184.824   2
   0 -14   4 13876.2 945.081   2
   0  14  -4 13299.2 824.214   2
   0 -14   4 15057.1 975.164   5
   0 -14   4 14127.4 644.545   3
   0 -14   3 3107.84 465.717   2
   0 -14   3 2393.11 257.834   3
   0  14  -3 3000.90 388.226   5
   0 -14   3 3039.78 480.372   5
   0  14  -3 3055.28 426.414   2
   0 -14   2 38381.1 1686.08   5
   0  14  -2 37417.7 1409.33   5
   0  14  -2 35521.8 1419.36   2
   0 -14   1-76.2282 215.889   5
   0  14  -1-26.1899 157.863   2
   0  14  -1-17.1183 123.449   5
   0  14   0 10851.0 794.163   5
   0  14   0 9071.86 754.547   2
   0 -14   0 9938.62 929.063   5
   0  14   1 1479.65 315.192   5
   0  14   1 1153.04 280.629   2
   0  14   2 418.367 167.114   5
   0  14   2 60.9517 129.162   2
   0  14   3 9189.05 843.909   2
   0  14   3 9893.31 830.860   5
   0  14   4 136.901 154.169   5
   0  14   4 334.477 245.016   2
   0  14   5 288.205 239.268   2
   0  14   5-142.149 202.127   5
   0 -14  -5 34.3323 61.6913   4
   0  14   6 132.289 203.724   2
   0  14   6-228.225 239.310   5
   0 -14  -6-55.1072 72.1576   4
   0  14   7 694.449 297.210   2
   0  14   7 363.178 210.194   5
   0  14   8-55.6026 244.250   5
   0  14   8 488.160 293.471   2
   0  14   9 280.267 160.633   5
   0  14   9 890.128 352.689   2
   0  14  10 888.348 375.148   2
   0  14  10 246.873 202.504   5
   0  14  11 226.307 285.120   2
   0  14  11-67.8143 296.304   5
   0  14  12-384.639 271.556   2
   0  14  12-744.227 457.170   5
   0  14  13-149.357 218.843   2
   0 -15  24 338.201 288.774   1
   0 -15  23 57.7175 267.033   1
   0 -15  22 2.60187 172.759   1
   0 -15  21 399.515 282.590   1
   0 -15  20-92.1742 213.278   1
   0 -15  19 540.481 293.915   1
   0 -15  18 10.0952 144.146   1
   0 -15  17 46.0171 166.540   1
   0 -15  16-12.8900 151.261   1
   0 -15  15 53.2071 148.833   1
   0  15 -14 238.379 167.251   2
   0 -15  14-5.05226 151.682   1
   0  15 -13-8.61092 134.649   2
   0 -15  13 86.2838 132.441   1
   0 -15  12 609.781 200.883   1
   0  15 -12 489.688 178.280   2
   0  15 -11 1370.99 284.689   2
   0 -15  11 1664.82 340.686   1
   0 -15  11 919.922 292.312   2
   0 -15  10 199.446 145.446   2
   0 -15  10 369.362 179.056   5
   0 -15  10 380.888 232.876   1
   0  15 -10-22.4942 115.856   2
   0 -15   9 240.558 169.067   5
   0  15  -9 249.444 180.100   2
   0 -15   9-31.4160 110.869   1
   0 -15   9 21.4668 123.894   2
   0 -15   8-120.784 139.555   2
   0 -15   8-77.9766 116.612   5
   0  15  -8 16.6075 107.271   2
   0 -15   8 7.37819 108.751   1
   0  15  -7 244.644 142.640   2
   0 -15   7 99.1835 126.411   1
   0 -15   7 244.657 156.391   2
   0 -15   7 212.896 126.374   5
   0 -15   6 226.676 158.765   1
   0 -15   6 145.071 95.2257   5
   0 -15   6 194.381 143.933   2
   0  15  -6 167.278 106.313   2
   0  15  -5 15133.3 889.026   2
   0 -15   5 15428.6 1062.53   2
   0 -15   5 14699.7 691.399   3
   0 -15   5 15854.0 1024.86   5
   0 -15   4 2325.17 419.578   5
   0 -15   4 1827.18 242.379   3
   0 -15   4 1672.14 342.249   2
   0  15  -4 1637.78 286.512   2
   0  15  -3 971.696 260.497   2
   0  15  -3 1212.63 260.894   5
   0 -15   3 1193.24 303.690   5
   0 -15   3 873.767 264.241   2
   0  15  -2 2303.68 375.146   5
   0 -15   2 1788.95 382.604   5
   0  15  -2 1899.40 341.960   2
   0  15  -1 1968.21 362.907   2
   0  15  -1 2215.12 372.882   5
   0  15   0 1650.65 351.792   5
   0  15   0 1371.67 306.833   2
   0  15   1-209.420 183.666   2
   0  15   1 192.354 156.179   5
   0  15   2 1229.39 326.049   5
   0  15   2 920.506 271.488   2
   0  15   3 883.141 285.405   5
   0  15   3 888.314 285.866   2
   0  15   4-6.39595 156.835   2
   0  15   4 133.230 183.054   5
   0 -15  -5 85.4379 73.0222   4
   0  15   5 162.072 182.499   5
   0  15   5 278.721 213.894   2
   0  15   6-173.221 210.796   5
   0  15   6 27.3002 188.524   2
   0  15   7-193.468 236.213   5
   0  15   7 669.470 327.720   2
   0  15   8 666.270 285.419   5
   0  15   8 540.689 338.410   2
   0  15   9-153.766 183.876   5
   0  15   9-23.9177 151.485   2
   0  15  10 26.2538 208.470   5
   0  15  10 501.031 319.272   2
   0  15  11-606.651 318.372   5
   0  15  11 44.4198 215.771   2
   0  15  12 197.287 266.061   2
   0 -16  23 1542.29 519.196   1
   0 -16  22 2440.28 549.399   1
   0 -16  21 113.278 187.306   1
   0 -16  20 1093.58 403.059   1
   0 -16  19 246.730 202.692   1
   0 -16  18 857.156 322.479   1
   0 -16  17 242.309 199.459   1
   0 -16  16 3307.42 527.201   1
   0  16 -15 599.805 241.368   2
   0 -16  15 134.486 156.179   1
   0 -16  14 12425.8 950.280   1
   0  16 -14 11469.6 854.316   2
   0  16 -13 460.177 188.614   2
   0 -16  13 528.609 231.921   1
   0 -16  12 8414.90 743.246   1
   0  16 -12 10555.7 790.697   2
   0 -16  11 740.854 248.623   1
   0  16 -11 552.786 218.135   2
   0 -16  10 50108.4 1734.77   1
   0  16 -10 49686.7 1614.47   2
   0 -16   9 1864.78 367.672   1
   0  16  -9 1830.36 329.074   2
   0 -16   9 1490.77 315.455   2
   0 -16   8 860.567 258.675   2
   0  16  -8 1105.55 274.518   2
   0 -16   8 1200.32 279.175   1
   0 -16   7 866.059 272.383   2
   0  16  -7 828.068 237.776   2
   0 -16   7 411.022 168.175   1
   0 -16   6 6387.47 625.802   1
   0 -16   6 5779.30 666.516   2
   0  16  -6 5593.95 569.037   2
   0 -16   5 74.4900 183.065   1
   0 -16   5 91.0396 122.981   2
   0  16  -5-102.778 188.841   2
   0 -16   5 154.314 87.4654   3
   0 -16   4-52.2914 166.711   2
   0 -16   4 0.29000 75.5885   3
   0  16  -4-112.202 199.465   2
   0  16  -3 437.478 193.762   5
   0  16  -3 381.971 219.977   2
   0  16  -2 2991.87 430.723   5
   0  16  -2 2566.42 411.893   2
   0  16  -1 1602.66 326.975   2
   0  16  -1 1785.79 346.401   5
   0  16   0-57.1401 173.271   2
   0  16   0 363.523 204.903   5
   0  16   1 1792.83 385.822   5
   0  16   1 1197.34 309.937   2
   0  16   2 1518.89 355.485   5
   0  16   2 1437.62 335.204   2
   0  16   3-113.500 234.547   2
   0  16   3 196.229 214.672   5
   0  16   4-94.5402 206.724   2
   0  16   4 133.021 143.166   5
   0  16   5 861.534 307.364   2
   0  16   5 1260.49 344.048   5
   0  16   6 593.358 304.147   2
   0  16   6 73.9177 158.068   5
   0  16   7 90.8152 190.497   5
   0  16   7 382.953 308.397   2
   0  16   8 329.748 274.484   2
   0  16   8 324.527 231.972   5
   0  16   9-213.927 217.883   5
   0  16   9 179.410 306.890   2
   0  16  10 347.464 315.683   2
   0  16  10-250.806 230.926   5
   0  16  11 0.42590 235.368   2
   0 -17  23-6.36850 199.589   1
   0 -17  22-14.1968 189.827   1
   0 -17  21 336.423 268.175   1
   0 -17  20 493.480 277.118   1
   0 -17  19 859.121 335.091   1
   0 -17  18 306.615 225.946   1
   0 -17  17 86.2606 179.862   1
   0 -17  16 67.6231 203.252   1
   0  17 -15 125.931 166.191   2
   0 -17  15 242.152 187.737   1
   0  17 -14 589.252 226.480   2
   0 -17  14-116.809 234.922   1
   0 -17  13 22.2302 143.396   1
   0  17 -13 312.456 196.889   2
   0 -17  12-58.8297 139.598   1
   0  17 -12 92.9721 109.785   2
   0  17 -11 1622.58 331.528   2
   0 -17  11 1984.81 378.506   1
   0 -17  10 72.4036 131.193   1
   0  17 -10-272.877 204.840   2
   0  17  -9 303.688 180.564   2
   0 -17   9-168.744 166.029   1
   0  17  -8 130.695 147.542   2
   0 -17   8-71.9798 153.634   1
   0  17  -7 3040.41 427.217   2
   0 -17   7 4493.13 520.590   1
   0 -17   6 629.581 257.636   1
   0  17  -6 278.669 201.506   2
   0 -17   5 800.240 174.389   3
   0 -17   5 890.686 285.649   1
   0  17  -5 693.567 215.117   2
   0  17  -4-25.6880 168.480   2
   0 -17   4-144.220 198.766   1
   0  17  -3 95.4254 156.478   2
   0  17  -3 344.367 212.437   5
   0  17  -2 1121.80 305.224   5
   0  17  -2 1367.76 333.308   2
   0  17  -1 75.1048 160.804   2
   0  17  -1-24.8165 122.807   5
   0  17   0 877.771 268.042   2
   0  17   0 777.745 255.410   5
   0  17   1 267.533 194.526   5
   0  17   1 97.5249 143.954   2
   0  17   2 1337.93 337.907   2
   0  17   2 1666.20 403.669   5
   0  17   3 867.531 285.701   2
   0  17   3 1504.78 395.745   5
   0  17   4 704.062 282.821   5
   0  17   4 366.965 222.480   2
   0  17   5 463.480 247.124   5
   0  17   5 178.050 184.677   2
   0  17   6 81.1685 173.862   5
   0  17   6-111.445 226.661   2
   0  17   7 144.189 195.584   5
   0  17   7 41.8291 165.701   2
   0  17   8 217.759 243.651   2
   0  17   8 28.6125 157.464   5
   0  17   9 304.756 274.694   2
   0  17   9-39.0927 186.517   5
   0 -18  23-92.7960 210.131   1
   0 -18  22-202.060 210.461   1
   0 -18  21 1626.80 463.920   1
   0 -18  20 49.6236 147.985   1
   0 -18  19 2390.02 488.464   1
   0 -18  18 514.861 235.063   1
   0 -18  17 4473.65 626.383   1
   0 -18  16 1755.30 405.494   1
   0  18 -16 2072.45 417.100   2
   0  18 -15 2411.61 430.204   2
   0 -18  15 2009.35 428.836   1
   0  18 -14-150.195 149.671   2
   0 -18  14-43.9118 137.114   1
   0  18 -13 4177.00 515.263   2
   0 -18  13 5041.98 610.121   1
   0 -18  12 947.211 287.468   1
   0  18 -12 1294.78 312.730   2
   0  18 -11-190.391 156.340   2
   0 -18  11 68.7062 135.035   1
   0  18 -10 384.912 189.445   2
   0 -18  10 218.677 117.127   1
   0 -18   9 3932.30 561.805   1
   0  18  -9 4817.34 550.969   2
   0 -18   8 29.2300 170.221   1
   0  18  -8 152.023 135.112   2
   0 -18   8 157.070 101.778   3
   0 -18   7 1580.43 256.787   3
   0  18  -7 1323.61 296.500   2
   0 -18   7 1751.50 369.031   1
   0  18  -6 628.533 222.415   2
   0 -18   6 996.455 303.646   1
   0  18  -5 5515.47 590.100   2
   0 -18   5 6803.31 722.872   1
   0  18  -4 7859.30 722.741   2
   0 -18   4 8432.39 831.693   1
   0  18  -3 468.588 237.366   5
   0  18  -3-124.030 128.721   2
   0  18  -2 1046.05 312.415   2
   0  18  -2 707.917 255.593   5
   0  18  -1 876.263 289.749   2
   0  18  -1 916.404 260.167   5
   0  18   0 312.733 188.627   2
   0  18   0 290.908 214.682   5
   0  18   1 97.3169 154.642   2
   0  18   1-35.4314 161.901   5
   0  18   2 1266.56 361.413   2
   0  18   2 1774.58 422.938   5
   0  18   3 39.3161 186.953   2
   0  18   3 192.567 215.243   5
   0  18   4-118.894 198.725   2
   0  18   4 355.391 245.044   5
   0  18   5-203.444 191.659   5
   0  18   5 92.6232 170.149   2
   0  18   6 336.963 270.274   5
   0  18   6-137.823 231.327   2
   0  18   7-38.4153 188.890   5
   0  18   7 58.7095 190.591   2
   0  18   8-299.071 242.318   2
   0 -19  22 104.280 220.038   1
   0 -19  21 268.841 228.431   1
   0 -19  20 227.569 262.089   1
   0 -19  19-48.4086 177.397   1
   0 -19  18 202.195 210.421   1
   0 -19  17-7.60130 171.681   1
   0  19 -16 620.768 307.461   2
   0 -19  16 611.959 276.823   1
   0 -19  15 183.756 157.311   1
   0  19 -15 176.754 182.249   2
   0 -19  14 251.763 198.836   1
   0  19 -14 183.837 185.976   2
   0  19 -13-47.7972 120.504   2
   0 -19  13 156.537 217.698   1
   0 -19  12 63.6379 137.485   1
   0  19 -12 88.5481 159.724   2
   0 -19  11 116.521 145.846   1
   0  19 -11-185.789 177.085   2
   0 -19  10-114.460 194.622   1
   0  19 -10 93.1012 126.000   2
   0 -19   9 48.4145 147.206   1
   0  19  -9 531.847 222.247   2
   0  19  -8 163.580 153.201   2
   0 -19   8 127.688 102.050   3
   0 -19   8-76.2976 167.151   1
   0 -19   7 2004.29 296.584   3
   0 -19   7 2477.40 442.294   1
   0  19  -7 2123.20 400.644   2
   0  19  -6-121.452 174.548   2
   0 -19   6 76.7083 167.684   1
   0 -19   5 988.269 309.325   1
   0  19  -5 866.634 253.704   2
   0  19  -4 29.6571 147.421   2
   0 -19   4 106.988 161.242   1
   0  19  -3 570.159 175.291   2
   0  19  -2 1.11758 123.907   5
   0  19  -2 70.5131 176.802   2
   0  19  -1 167.815 190.958   2
   0  19  -1 83.3036 168.639   5
   0  19   0 346.075 223.476   5
   0  19   0 163.030 162.471   2
   0  19   1 81.8596 148.540   5
   0  19   1 31.5810 135.841   2
   0  19   2-31.4721 138.170   2
   0  19   2 50.2281 136.921   5
   0  19   3 153.100 162.891   2
   0  19   3 64.6849 196.364   5
   0  19   4-260.361 208.443   2
   0  19   4 237.347 214.180   5
   0  19   5 513.509 284.974   2
   0  19   5 1113.34 370.486   5
   0  19   6 212.713 249.898   2
   0  19   6 441.036 257.656   5
   0 -20  22 1956.37 504.973   1
   0 -20  21 1275.85 442.835   1
   0 -20  20 699.373 315.934   1
   0 -20  19 664.714 331.391   1
   0 -20  18-235.826 248.517   1
   0 -20  17 1955.54 463.891   1
   0  20 -17 1723.91 411.627   2
   0 -20  16 3681.66 601.167   1
   0  20 -16 3607.29 543.403   2
   0 -20  15 224.867 153.339   1
   0  20 -15 662.683 278.710   2
   0 -20  14 6300.33 704.500   1
   0  20 -14 5426.80 640.733   2
   0 -20  13 373.196 226.321   1
   0  20 -13 295.500 173.076   2
   0 -20  12 4881.58 606.982   1
   0  20 -12 3755.80 510.106   2
   0 -20  11 335.564 225.788   1
   0  20 -11 163.584 134.457   2
   0 -20  10 587.401 258.578   1
   0  20 -10 759.026 243.743   2
   0 -20   9-318.307 255.258   1
   0  20  -9 133.771 192.117   2
   0 -20   8 2600.58 485.533   1
   0  20  -8 2505.90 410.802   2
   0  20  -7 157.365 181.905   2
   0 -20   7 257.610 273.072   1
   0 -20   6 435.569 233.905   1
   0  20  -6 163.199 155.091   2
   0 -20   5 161.810 197.512   1
   0  20  -5-426.863 247.948   2
   0  20  -4 116.185 125.010   2
   0 -20   4 183.731 168.774   1
   0  20  -3-103.775 205.103   2
   0  20  -2 1072.91 344.466   5
   0  20  -2 601.069 273.974   2
   0  20  -1 299.142 212.651   5
   0  20  -1 36.4349 130.415   2
   0  20   0 463.068 264.436   2
   0  20   0 291.208 206.891   5
   0  20   1 272.461 190.650   5
   0  20   1 276.407 228.993   2
   0  20   2 107.780 133.613   5
   0  20   2-117.264 201.015   2
   0  20   3 38.4868 161.949   2
   0  20   3 133.012 179.756   5
   0  20   4 116.396 213.992   5
   0  20   4-46.4092 170.603   2
   0  20   5 675.418 372.572   5
   0  20   5 330.678 318.991   2
   0 -21  21 233.126 234.318   1
   0 -21  20 41.2755 148.665   1
   0 -21  19-36.3589 159.742   1
   0 -21  18-60.3048 163.733   1
   0  21 -17 49.7800 168.752   2
   0 -21  17-60.0447 180.155   1
   0 -21  16 46.2378 182.320   1
   0  21 -16 245.817 212.918   2
   0  21 -15 279.805 216.096   2
   0 -21  15 82.8075 167.032   1
   0 -21  14-119.010 163.129   1
   0  21 -14 300.420 226.537   2
   0  21 -13 204.158 191.168   2
   0 -21  13 159.517 185.415   1
   0 -21  12 240.726 173.684   1
   0  21 -12 189.032 168.376   2
   0 -21  11-152.993 157.910   1
   0  21 -11-75.9750 131.500   2
   0  21 -10 617.427 235.765   2
   0 -21  10 49.8402 180.728   1
   0  21  -9 181.117 198.268   2
   0 -21   9-182.273 205.675   1
   0  21  -8 44.3914 135.158   2
   0 -21   8-74.0799 149.463   1
   0  21  -7 318.073 217.346   2
   0 -21   7 220.783 170.069   1
   0  21  -6-92.7576 174.805   2
   0 -21   6 107.919 180.414   1
   0 -21   5 297.979 225.615   1
   0  21  -5 115.304 126.780   2
   0 -21   4 466.496 279.370   1
   0  21  -4 6.56331 147.442   2
   0 -21   3-239.511 249.199   1
   0  21  -3-213.437 180.088   2
   0  21  -2-244.723 195.363   2
   0  21  -1 248.603 222.180   2
   0  21  -1 273.465 256.697   5
   0  21   0 457.688 271.783   5
   0  21   0 250.101 246.221   2
   0  21   1 76.8359 151.473   5
   0  21   1 64.6726 179.113   2
   0  21   2 447.702 266.828   5
   0  21   2 288.529 242.931   2
   0  21   3 4.70181 135.136   2
   0  21   3-37.0751 158.438   5
   0 -22  20-23.3203 143.497   1
   0 -22  19 120.710 242.246   1
   0 -22  18 675.571 317.285   1
   0 -22  17 1457.99 423.684   1
   0  22 -17 1663.74 422.174   2
   0  22 -16 548.125 264.310   2
   0 -22  16 370.335 246.292   1
   0 -22  15 641.134 246.030   1
   0  22 -15 649.830 272.395   2
   0 -22  14 885.196 309.364   1
   0  22 -14 593.938 278.221   2
   0 -22  13-244.762 185.105   1
   0  22 -13 177.571 170.863   2
   0  22 -12 1870.38 401.465   2
   0 -22  12 1738.01 411.325   1
   0  22 -11 391.248 201.024   2
   0 -22  11 763.631 303.814   1
   0 -22  10 580.440 291.924   1
   0  22 -10 1433.12 349.074   2
   0 -22   9 1246.65 392.575   1
   0  22  -9 2484.16 446.657   2
   0 -22   8 191.973 191.913   1
   0  22  -8 83.7351 152.040   2
   0  22  -7 1812.71 390.852   2
   0 -22   7 1548.37 408.944   1
   0 -22   6 188.738 209.491   1
   0  22  -6 176.782 193.057   2
   0 -22   5 194.831 183.809   1
   0  22  -5-337.412 232.212   2
   0 -22   4 78.6017 213.316   1
   0  22  -4-149.444 174.340   2
   0  22  -3 1110.65 334.645   2
   0 -22   3 1462.49 443.903   1
   0  22  -2-662.930 274.219   2
   0  22  -1 249.014 213.314   5
   0  22  -1-758.054 299.150   2
   0  22   0 143.015 186.182   2
   0  22   0 21.1188 148.851   5
   0  22   1-63.2639 164.631   5
   0 -23  19-56.0305 153.307   1
   0 -23  18 153.632 249.947   1
   0  23 -17 215.112 245.427   2
   0 -23  17 162.621 238.235   1
   0  23 -16 346.004 234.297   2
   0 -23  16 52.9829 153.841   1
   0 -23  15 305.314 241.800   1
   0  23 -15 217.790 208.175   2
   0  23 -14-25.3319 130.932   2
   0 -23  14-151.414 205.157   1
   0  23 -13 165.634 163.660   2
   0 -23  13-87.1628 147.949   1
   0  23 -12 1327.51 370.014   2
   0 -23  12 943.051 336.313   1
   0 -23  11-56.5380 184.217   1
   0  23 -11-55.6660 151.998   2
   0 -23  10-29.1560 181.037   1
   0  23 -10-154.860 146.313   2
   0 -23   9-101.015 212.965   1
   0  23  -9 298.924 205.866   2
   0  23  -8 43.3545 175.778   2
   0 -23   8 81.7171 215.094   1
   0  23  -7-120.849 167.835   2
   0 -23   7-94.4218 188.257   1
   0 -23   6-257.879 203.749   1
   0  23  -6 38.0732 156.700   2
   0 -23   5 39.6179 184.739   1
   0  23  -5 52.2262 179.957   2
   0  23  -4 113.832 134.696   2
   0 -23   4 69.7335 210.174   1
   0  23  -3 390.172 299.445   2
   0 -23   3 338.117 311.011   1
   0 -23   2 143.318 228.454   1
   0  23  -2-477.917 244.252   2
   0 -24  17 473.609 321.788   1
   0  24 -17 1105.82 385.010   2
   0  24 -16 145.858 191.578   2
   0 -24  16 116.911 142.654   1
   0  24 -15 596.356 293.128   2
   0 -24  15 386.148 258.094   1
   0 -24  14 335.202 233.181   1
   0  24 -14 366.281 204.449   2
   0  24 -13 66.1625 177.407   2
   0 -24  13 241.419 219.809   1
   0  24 -12 234.584 198.051   2
   0 -24  12 264.920 211.855   1
   0  24 -11 5.11269 157.338   2
   0 -24  11-169.230 187.587   1
   0 -24  10 46.8986 165.421   1
   0  24 -10-241.499 219.459   2
   0  24  -9 203.552 187.302   2
   0 -24   9-246.825 226.974   1
   0 -24   8 116.693 223.275   1
   0  24  -8 293.057 213.255   2
   0 -24   7-258.486 229.232   1
   0  24  -7 61.7979 129.461   2
   0 -24   6 292.504 292.902   1
   0  24  -6 254.281 210.169   2
   0 -24   5 35.1423 173.226   1
   0  24  -5 22.7018 125.927   2
   0  25 -15 193.239 231.201   2
   0 -25  14 166.636 229.382   1
   0  25 -14 213.564 227.257   2
   0  25 -13 7.50565 128.850   2
   0 -25  13 145.264 218.766   1
   0 -25  12 239.552 268.712   1
   0  25 -12 305.339 240.149   2
   0 -25  11 25.3837 168.747   1
   0  25 -11-46.3365 133.206   2
   0  25 -10-595.630 251.233   2
   0 -25  10 36.5112 229.311   1
   0 -25   9 46.8175 156.654   1
   0  25  -9 78.4533 183.837   2
   1 -24   7-272.143 250.781   1
   1 -24   8-247.605 236.790   1
   1 -24   9-210.255 244.294   1
  -1  24 -10 50.9821 128.488   2
   1 -24  10 48.6695 217.779   1
   1 -24  11 124.674 169.831   1
  -1  24 -11 78.3402 160.566   2
   1 -24  12 550.001 316.048   1
  -1  24 -12 246.771 170.417   2
   1 -24  13 19.0642 167.995   1
  -1  24 -13 109.906 206.209   2
  -1  24 -14 370.952 247.865   2
   1 -24  14 405.889 271.214   1
  -1  24 -15 323.710 235.543   2
   1 -23   3 206.180 240.529   1
   1 -23   4 233.185 280.419   1
   1 -23   5 45.2557 217.033   1
  -1  23  -6 155.716 135.640   2
   1 -23   6 155.168 259.891   1
  -1  23  -7 92.5663 156.314   2
   1 -23   7-255.334 235.872   1
  -1  23  -8-79.9694 130.138   2
   1 -23   8 10.1316 188.017   1
   1 -23   9-0.35847 162.483   1
  -1  23  -9-209.166 204.359   2
  -1  23 -10 37.8654 130.981   2
   1 -23  10 255.918 234.948   1
   1 -23  11 1344.09 434.830   1
  -1  23 -11 1183.08 320.676   2
  -1  23 -12 257.974 201.385   2
   1 -23  12 175.425 227.648   1
  -1  23 -13 281.967 214.528   2
   1 -23  13 106.047 170.655   1
   1 -23  14 249.665 223.793   1
  -1  23 -14 382.305 240.871   2
  -1  23 -15 97.5162 179.812   2
   1 -23  15-172.652 220.384   1
   1 -23  16 75.7489 198.117   1
   1 -23  17 218.908 221.058   1
  -1  22   0 191.218 237.206   5
  -1  22  -1 388.578 237.737   5
   1 -22   3 134.531 236.040   1
  -1  22  -3 97.1721 161.215   2
  -1  22  -4-86.1071 140.705   2
   1 -22   4-134.112 227.607   1
  -1  22  -5-86.7962 118.644   2
   1 -22   5-88.2698 211.544   1
   1 -22   6 283.594 244.641   1
  -1  22  -6 53.5140 117.059   2
  -1  22  -7 179.831 146.844   2
   1 -22   7-195.023 215.101   1
   1 -22   8 60.4862 205.771   1
  -1  22  -8 22.7730 104.933   2
   1 -22   9-160.133 206.296   1
  -1  22  -9-163.717 148.227   2
   1 -22  10 1006.29 364.136   1
  -1  22 -10 779.410 255.121   2
  -1  22 -11 2330.27 418.345   2
   1 -22  11 2167.18 507.889   1
   1 -22  12 4602.51 702.713   1
  -1  22 -12 3555.61 521.895   2
  -1  22 -13 248.118 182.207   2
   1 -22  13 43.0656 161.978   1
   1 -22  14-57.3586 182.673   1
  -1  22 -14 207.685 202.081   2
   1 -22  15-26.6722 164.071   1
  -1  22 -15 77.8621 167.376   2
   1 -22  16-23.7821 169.924   1
   1 -22  17 100.122 179.681   1
   1 -22  18 232.146 276.202   1
  -1  21   2 0.32359 163.772   5
  -1  21   1 122.811 173.447   5
  -1  21   0 310.398 236.252   5
  -1  21   0-246.549 228.670   2
  -1  21  -1 206.800 191.685   5
  -1  21  -1 72.8221 120.218   2
  -1  21  -2-367.515 221.845   2
  -1  21  -2 347.983 264.278   5
   1 -21   3 400.707 249.141   1
  -1  21  -3 255.065 168.485   2
  -1  21  -4 717.161 261.865   2
   1 -21   4 1168.09 384.589   1
   1 -21   5 446.729 288.350   1
  -1  21  -5 230.646 165.472   2
   1 -21   6 133.846 190.193   1
  -1  21  -6 116.771 146.926   2
  -1  21  -7 1298.54 308.874   2
   1 -21   7 1149.11 351.697   1
   1 -21   8 112.741 205.245   1
  -1  21  -8 322.883 168.801   2
  -1  21  -9-174.869 162.455   2
   1 -21   9-13.3677 173.353   1
   1 -21  10 74.8373 174.431   1
  -1  21 -10 121.267 134.545   2
   1 -21  11 116.574 177.230   1
  -1  21 -11-3.61229 109.331   2
   1 -21  12 225.395 220.600   1
  -1  21 -12 135.468 170.607   2
   1 -21  13 256.576 188.106   1
  -1  21 -13 556.729 233.940   2
  -1  21 -14 395.535 224.976   2
   1 -21  14-33.6024 136.270   1
  -1  21 -15 176.624 189.152   2
   1 -21  15 124.367 192.369   1
   1 -21  16-88.9946 183.280   1
   1 -21  17 21.5377 212.347   1
   1 -21  18-74.0109 211.832   1
   1 -21  19 108.423 216.004   1
   1 -21  20 313.340 273.970   1
  -1  20   4 195.790 218.160   5
  -1  20   3 400.929 290.464   5
  -1  20   2-128.252 141.672   2
  -1  20   2-436.639 262.110   5
  -1  20   1 274.434 226.804   5
  -1  20   1 254.234 201.464   2
  -1  20   0 252.062 222.628   2
  -1  20   0 184.972 212.871   5
  -1  20  -1 733.919 294.070   5
  -1  20  -1 416.427 167.379   2
  -1  20  -2-230.710 218.627   2
  -1  20  -2 85.7171 201.463   5
  -1  20  -3-56.4911 156.498   2
   1 -20   4-120.209 251.488   1
  -1  20  -4 0.20168 107.678   2
   1 -20   5 96.5554 205.472   1
  -1  20  -5 137.505 133.103   2
  -1  20  -6 764.799 268.521   2
   1 -20   6 731.175 320.100   1
  -1  20  -7 1553.19 330.602   2
   1 -20   7 754.584 347.053   1
   1 -20   8 194.275 225.217   1
  -1  20  -8 417.878 219.050   2
  -1  20  -9 284.533 158.745   2
   1 -20   9 400.356 247.450   1
   1 -20  10-1.04485 172.942   1
  -1  20 -10-37.6855 110.733   2
  -1  20 -11 274.062 165.253   2
   1 -20  11 499.523 248.818   1
   1 -20  12 957.252 328.808   1
  -1  20 -12 974.439 270.419   2
   1 -20  13-38.4903 158.821   1
  -1  20 -13 192.655 183.558   2
  -1  20 -14 297.725 225.719   2
   1 -20  14 129.458 203.166   1
   1 -20  15 1146.98 340.219   1
   1 -20  16 62.1818 176.663   1
   1 -20  17 2383.95 518.129   1
   1 -20  18 179.452 209.193   1
   1 -20  19 988.798 375.305   1
   1 -20  20 148.810 204.426   1
  -1  19   5-102.322 170.084   2
  -1  19   5 0.65247 142.209   5
  -1  19   4 259.634 191.174   2
  -1  19   4 503.596 316.807   5
  -1  19   3 89.6381 127.529   2
  -1  19   3 459.824 276.482   5
  -1  19   2 479.250 258.707   5
  -1  19   2 298.824 174.868   2
  -1  19   1 189.253 188.083   5
  -1  19   1 122.715 154.183   2
  -1  19   0 815.777 283.615   5
  -1  19   0 887.069 288.952   2
  -1  19  -1 287.729 205.016   5
  -1  19  -1 222.666 158.736   2
  -1  19  -2 20.6824 131.999   5
  -1  19  -2-634.637 227.913   2
  -1  19  -3-33.0465 184.387   2
  -1  19  -3 637.240 260.692   5
   1 -19   4-51.6732 165.475   1
  -1  19  -4-168.662 157.861   2
   1 -19   5 7.36283 166.649   1
   1 -19   5-6.33618 103.413   3
  -1  19  -5 186.722 169.079   2
   1 -19   6 287.496 218.047   1
   1 -19   6 606.647 176.172   3
  -1  19  -6 541.282 212.706   2
   1 -19   7-43.6059 190.734   1
  -1  19  -7 103.925 140.833   2
   1 -19   7 68.8505 84.4644   3
   1 -19   8-135.418 193.387   1
   1 -19   8 300.230 137.760   3
  -1  19  -8 377.795 199.990   2
   1 -19   9 2682.16 515.888   1
  -1  19  -9 2155.89 356.122   2
  -1  19 -10-40.8447 135.604   2
   1 -19  10 160.134 161.289   1
   1 -19  11 622.943 286.690   1
  -1  19 -11 193.609 140.457   2
   1 -19  12 5982.76 712.936   1
  -1  19 -12 4982.59 575.357   2
  -1  19 -13 636.845 279.932   2
   1 -19  13 936.077 317.320   1
  -1  19 -14 252.847 182.574   2
   1 -19  14 232.788 186.278   1
   1 -19  15 172.800 140.107   1
   1 -19  16 58.3061 165.818   1
   1 -19  17 1434.42 409.869   1
   1 -19  18 375.098 274.577   1
   1 -19  19 460.769 296.333   1
   1 -19  20 690.868 329.803   1
   1 -19  21 0.31133 157.945   1
  -1  18   7-20.6387 209.700   5
  -1  18   7-87.8705 220.801   2
  -1  18   6 400.948 291.613   5
  -1  18   6 83.7175 154.252   2
  -1  18   5 134.657 162.178   5
  -1  18   5-92.9506 188.664   2
  -1  18   4-174.802 189.379   2
  -1  18   4 283.634 245.840   5
  -1  18   3-67.2968 164.416   2
  -1  18   3 111.559 218.951   5
  -1  18   2-68.7967 148.962   2
  -1  18   2 235.569 231.982   5
  -1  18   1 9.75701 111.123   2
  -1  18   1 177.735 217.671   5
  -1  18   0 121.905 152.678   2
  -1  18   0 54.8063 141.409   5
  -1  18  -1 111.072 152.910   2
  -1  18  -1-194.091 201.430   5
  -1  18  -2 413.473 236.865   5
  -1  18  -2-185.933 199.264   2
  -1  18  -3 800.731 287.540   5
  -1  18  -3 53.6670 148.223   2
  -1  18  -4 2745.52 394.288   2
   1 -18   4 2599.12 490.526   1
   1 -18   5 8678.37 854.994   1
   1 -18   5 7037.81 569.492   3
  -1  18  -5 7302.91 641.808   2
   1 -18   5 7515.91 788.716   2
  -1  18  -6 40.3157 105.133   2
   1 -18   6 245.179 134.735   3
   1 -18   6 194.547 144.798   1
   1 -18   6-127.870 147.423   2
   1 -18   7 3524.31 420.965   3
  -1  18  -7 3935.32 463.877   2
   1 -18   7 3137.60 516.370   2
   1 -18   8 271.138 140.021   3
   1 -18   8 64.5681 160.150   1
  -1  18  -8 318.098 165.632   2
  -1  18  -9-16.0898 130.202   2
   1 -18   9-7.72315 151.791   1
   1 -18  10 572.435 247.414   1
  -1  18 -10 750.036 214.993   2
  -1  18 -11 1547.86 302.427   2
   1 -18  11 1651.18 409.848   1
  -1  18 -12 123.464 153.394   2
   1 -18  12 65.7894 139.895   1
  -1  18 -13 119.919 167.101   2
   1 -18  13 54.7370 143.291   1
   1 -18  14 1244.26 335.767   1
  -1  18 -14 1519.11 333.052   2
   1 -18  15 223.474 211.728   1
   1 -18  16 646.929 258.851   1
   1 -18  17-84.4466 186.596   1
   1 -18  18-44.8530 148.794   1
   1 -18  19 72.8603 168.706   1
   1 -18  20 772.354 306.479   1
   1 -18  21-142.727 185.465   1
   1 -18  22 424.803 303.676   1
  -1  17   9 234.176 244.411   2
  -1  17   8-3.53438 140.600   2
  -1  17   8-142.777 246.399   5
  -1  17   7 313.354 239.421   5
  -1  17   7-142.852 226.290   2
  -1  17   6 7.84608 177.248   5
  -1  17   6-238.354 216.022   2
  -1  17   5-85.2479 175.421   2
  -1  17   5-21.1330 159.789   5
  -1  17   4 1029.63 298.210   2
  -1  17   4 1093.02 336.238   5
  -1  17   3 142.897 183.947   2
  -1  17   3 439.716 299.542   5
  -1  17   2 679.152 310.171   5
  -1  17   2 452.580 201.638   2
  -1  17   1 317.483 204.045   2
  -1  17   1 904.647 301.821   5
  -1  17   0 1142.59 320.655   5
  -1  17   0 1086.90 283.662   2
  -1  17  -1 2034.36 373.357   2
  -1  17  -1 1715.27 371.497   5
  -1  17  -2 3112.80 474.252   5
  -1  17  -2 2523.59 403.023   2
  -1  17  -3 3260.29 473.176   5
  -1  17  -3 3020.10 409.596   2
   1 -17   4 583.186 171.785   3
   1 -17   4 504.376 193.541   2
  -1  17  -4 613.045 198.042   2
   1 -17   4 749.011 259.735   1
  -1  17  -5 175.162 146.076   2
   1 -17   5 90.7283 104.030   3
   1 -17   5 27.2800 107.742   2
   1 -17   5 171.833 219.368   1
   1 -17   6 9102.16 658.896   3
  -1  17  -6 9986.19 720.715   2
   1 -17   6 9170.88 822.333   2
   1 -17   7 1440.21 262.487   3
  -1  17  -7 1827.25 326.703   2
   1 -17   7 1199.56 309.181   2
   1 -17   8 2625.25 443.204   2
   1 -17   8 2352.77 433.308   1
  -1  17  -8 2522.16 377.227   2
   1 -17   9 207.826 130.208   2
  -1  17  -9 195.934 122.727   2
   1 -17   9 199.707 155.388   1
  -1  17 -10 117.445 118.548   2
   1 -17  10 11.6093 90.3842   2
   1 -17  10 178.314 180.503   1
   1 -17  11 1202.44 326.150   1
  -1  17 -11 954.723 255.519   2
  -1  17 -12 6494.55 616.730   2
   1 -17  12 7952.70 742.851   1
   1 -17  13 120.396 165.724   1
  -1  17 -13 145.242 161.967   2
   1 -17  14 145.471 148.974   1
   1 -17  15-134.710 148.731   1
   1 -17  16 243.416 198.988   1
   1 -17  17-125.506 174.951   1
   1 -17  18 447.067 248.366   1
   1 -17  19 244.270 257.806   1
   1 -17  20 56.4683 170.561   1
   1 -17  21-98.2931 258.421   1
   1 -17  22 48.0003 180.901   1
  -1  16  10 362.793 291.723   2
  -1  16   9 96.1955 232.571   2
  -1  16   9-29.5056 187.748   5
  -1  16   8 278.954 207.817   2
  -1  16   8 300.040 251.812   5
  -1  16   7 39.7069 152.863   2
  -1  16   7-304.163 237.529   5
  -1  16   6-455.716 233.999   2
  -1  16   6 175.540 189.567   5
  -1  16   5 45.1374 162.688   5
  -1  16   5 190.671 121.976   2
  -1  16   4 244.031 223.438   5
  -1  16   4-198.053 230.369   2
  -1  16   3 1039.26 295.082   2
  -1  16   3 1156.23 346.478   5
  -1  16   2 814.780 296.048   5
  -1  16   2 378.450 180.849   2
  -1  16   1 4052.12 507.003   2
  -1  16   1 4386.79 590.435   5
  -1  16   0 4504.08 571.499   5
  -1  16   0 3098.94 441.402   2
  -1  16  -1 273.090 196.194   5
  -1  16  -1 182.657 155.992   2
  -1  16  -2 23.8263 137.413   2
  -1  16  -2 27.1374 145.359   5
  -1  16  -3 1168.53 295.668   5
  -1  16  -3 719.907 185.789   2
  -1  16  -4 1816.42 307.456   2
   1 -16   4 1243.01 323.475   1
   1 -16   4 1439.50 317.810   2
   1 -16   4 1302.55 240.819   3
   1 -16   5 3700.69 498.103   2
   1 -16   5 3744.41 536.575   1
   1 -16   5 3860.50 411.870   3
  -1  16  -5 3949.11 433.366   2
   1 -16   6 979.288 230.734   3
   1 -16   6 1120.03 278.726   2
  -1  16  -6 1031.32 280.733   2
   1 -16   6 1253.19 288.271   1
   1 -16   7 3818.97 495.127   1
   1 -16   7 3101.18 459.264   2
  -1  16  -7 3309.84 400.645   2
   1 -16   8-145.256 177.681   2
  -1  16  -8-227.329 182.999   2
   1 -16   8-307.608 226.639   1
  -1  16  -9 818.469 219.238   2
   1 -16   9 641.009 192.299   2
   1 -16   9 663.715 264.990   1
   1 -16  10 1440.00 334.887   2
  -1  16 -10 1394.51 301.912   2
   1 -16  10 1759.32 364.101   1
  -1  16 -11 69.4874 101.676   2
   1 -16  11 144.826 162.052   2
   1 -16  11 58.8083 190.087   1
  -1  16 -12 3566.39 444.825   2
   1 -16  12 4257.67 552.482   1
   1 -16  13 269.043 174.260   1
  -1  16 -13 196.188 161.295   2
   1 -16  14 3069.96 488.902   1
   1 -16  15 4023.53 589.578   1
   1 -16  16 495.823 237.915   1
   1 -16  17 2775.36 507.735   1
   1 -16  18 607.206 300.460   1
   1 -16  19 3649.51 597.343   1
   1 -16  20 163.612 204.312   1
   1 -16  21 867.288 346.722   1
   1 -16  22 455.226 300.199   1
   1 -16  23-17.9230 200.717   1
  -1  15  12 193.680 260.647   2
  -1  15  11 132.811 210.838   2
  -1  15  10-153.814 282.621   5
  -1  15  10 191.449 250.186   2
  -1  15   9 984.601 287.134   5
  -1  15   9 1126.73 366.955   2
  -1  15   8 166.725 151.475   5
  -1  15   8 126.993 211.263   2
  -1  15   7 1180.01 364.805   5
  -1  15   7 1425.58 421.942   2
  -1  15   6 96.3073 197.168   5
  -1  15   6 411.120 231.641   2
  -1  15   5 507.118 244.628   5
  -1  15   5 767.309 273.587   2
  -1  15   4 3477.02 495.593   2
  -1  15   4 3727.10 582.847   5
  -1  15   3 131.884 170.148   5
  -1  15   3-125.006 196.102   2
  -1  15   2 276.411 158.459   2
  -1  15   2 216.246 194.238   5
  -1  15   1 3354.89 511.097   5
  -1  15   1 3257.94 432.544   2
  -1  15   0 947.296 327.160   5
  -1  15   0 636.794 213.920   2
  -1  15  -1 1741.55 364.976   5
  -1  15  -1 1410.43 283.962   2
  -1  15  -2 919.046 261.994   5
  -1  15  -2 1004.24 258.169   2
   1 -15   3 259.135 127.510   2
  -1  15  -3 62.8200 151.519   2
  -1  15  -3 292.122 177.206   5
   1 -15   4 8045.04 715.885   2
  -1  15  -4 8388.74 625.104   2
   1 -15   5 2849.07 458.243   1
  -1  15  -5 3397.47 390.591   2
   1 -15   5 3207.38 437.054   2
   1 -15   5 2854.51 344.896   3
  -1  15  -6 159.123 117.526   2
   1 -15   6-61.1609 188.899   1
   1 -15   6 153.323 119.631   2
   1 -15   6-5.68229 78.3545   3
   1 -15   7 2386.29 372.402   2
   1 -15   7 1855.72 345.323   1
  -1  15  -8 1589.63 283.742   2
   1 -15   8 937.274 241.143   1
   1 -15   8 1435.01 280.054   2
   1 -15   9 4327.67 534.028   1
   1 -15   9 3332.08 453.212   2
  -1  15  -9 3845.99 420.183   2
   1 -15  10 36553.5 1522.98   1
   1 -15  10 35637.2 1476.10   2
  -1  15 -10 35452.2 1280.93   2
   1 -15  11 1774.41 344.432   2
  -1  15 -11 1512.38 293.475   2
   1 -15  11 1470.38 338.542   1
  -1  15 -12 793.455 227.119   2
   1 -15  12 984.057 252.788   2
   1 -15  12 311.225 169.264   1
   1 -15  13 1547.37 340.288   1
   1 -15  14-83.6153 133.458   1
   1 -15  15 2747.89 482.527   1
   1 -15  16 98.7646 137.972   1
   1 -15  17 1423.99 386.873   1
   1 -15  18 635.955 301.257   1
   1 -15  19 364.439 279.309   1
   1 -15  20 714.248 297.711   1
   1 -15  21 410.863 268.539   1
   1 -15  22-188.851 205.908   1
   1 -15  23 39.4329 211.779   1
  -1  14  13 135.703 241.674   2
  -1  14  12-649.791 333.340   5
  -1  14  12-190.980 207.407   2
  -1  14  11-122.412 269.826   5
  -1  14  11-9.86878 176.324   2
  -1  14  10 821.221 336.962   2
  -1  14  10 799.767 338.933   5
  -1  14   9 8.43770 161.414   2
  -1  14   9-239.791 294.233   5
  -1  14   8 411.266 248.280   2
  -1  14   8 351.352 158.867   3
  -1  14   7 80.8866 189.915   5
  -1  14   7 139.906 113.313   3
  -1  14   7-160.234 186.778   2
  -1  14   6 555.763 315.082   5
  -1  14   6 445.041 234.336   2
  -1  14   5 3073.59 506.429   2
  -1  14   5 2964.34 516.265   5
  -1  14   4 1959.70 383.232   2
  -1  14   4 1794.29 392.786   5
  -1  14   3 4893.12 560.185   2
  -1  14   3 5449.60 654.975   5
  -1  14   2 1940.18 402.825   5
  -1  14   2 1656.86 318.191   2
  -1  14   1 767.483 193.912   2
  -1  14   1 890.778 295.696   5
  -1  14   0 326.092 219.910   5
  -1  14   0-161.142 152.738   2
  -1  14  -1 583.151 231.104   5
  -1  14  -1 489.518 179.305   2
  -1  14  -2 565.978 185.169   2
  -1  14  -2 194.881 144.676   5
   1 -14   2 121.598 159.225   5
   1 -14   3 15507.8 1046.69   5
  -1  14  -3 16056.7 929.192   5
  -1  14  -3 15981.7 825.916   2
   1 -14   4 1848.66 370.041   5
   1 -14   4 2058.34 324.771   2
  -1  14  -4 2007.11 280.566   2
  -1  14  -4 2410.20 360.886   5
  -1  14  -5 34182.9 1170.17   2
   1 -14   5 43723.8 1634.47   1
   1 -14   5 36804.6 1541.01   5
   1 -14   5 26859.6 1242.79   2
  -1  14  -6 8291.51 579.424   2
   1 -14   6 7853.02 704.983   5
   1 -14   6 8266.25 668.773   2
   1 -14   6 9102.79 687.909   1
   1 -14   7 9790.07 722.116   2
  -1  14  -7 9730.93 625.075   2
   1 -14   7 10475.1 778.412   5
   1 -14   7 10249.5 760.741   1
   1 -14   8 5544.60 572.055   5
   1 -14   8 5427.40 535.788   2
  -1  14  -8 5292.95 467.561   2
   1 -14   9 2900.18 406.581   1
   1 -14   9 2532.12 378.292   2
   1 -14   9 2642.64 395.089   5
  -1  14  -9 2389.21 314.222   2
   1 -14  10 747.397 278.411   1
  -1  14 -10 365.051 168.056   2
   1 -14  10 330.326 161.501   2
  -1  14 -11 5532.72 504.128   2
   1 -14  11 5163.21 555.253   1
   1 -14  11 5097.38 553.042   2
   1 -14  12 1028.65 260.755   1
  -1  14 -12 1166.11 260.723   2
   1 -14  12 805.334 194.625   2
   1 -14  13 1114.41 265.755   2
   1 -14  13 1201.03 290.227   1
   1 -14  14 2710.45 467.294   1
   1 -14  15 1006.86 322.956   1
   1 -14  16 1142.25 336.528   1
   1 -14  17 513.465 289.794   1
   1 -14  18 1051.07 321.962   1
   1 -14  19 36.7885 160.904   1
   1 -14  20 177.506 227.996   1
   1 -14  21 198.302 252.186   1
   1 -14  22 4339.96 749.903   1
   1 -14  23 114.503 195.451   1
  -1  13  14-810.265 365.558   2
  -1  13  13-641.879 320.419   2
  -1  13  13 587.171 376.301   5
  -1  13  12 914.614 437.982   5
  -1  13  12 65.4887 172.121   2
  -1  13  11-191.516 202.858   2
  -1  13  11 604.342 338.028   5
  -1  13  10 19.7214 112.916   3
  -1  13  10-181.197 196.755   2
  -1  13  10 4.11800 249.370   5
  -1  13   9 855.485 303.104   2
  -1  13   9 1064.49 239.828   3
  -1  13   9 248.013 175.832   5
  -1  13   8 253.421 120.328   3
  -1  13   8 223.781 182.322   5
   1 -13  -8 605.368 152.770   4
  -1  13   8 301.231 229.800   2
  -1  13   7 32.4182 219.639   5
  -1  13   7 291.066 130.193   3
  -1  13   7-2.58200 149.692   2
  -1  13   6 2499.24 447.860   2
  -1  13   6 2345.72 311.764   3
  -1  13   6 1998.80 402.077   5
  -1  13   5 1454.90 243.189   3
  -1  13   5 1391.42 340.264   2
  -1  13   5 1260.16 357.341   5
  -1  13   4 719.001 237.429   2
  -1  13   4 541.737 206.956   5
  -1  13   3 10778.5 804.175   2
  -1  13   3 10620.7 874.190   5
  -1  13   2 10226.4 756.162   2
  -1  13   2 10128.7 814.181   5
  -1  13   1 5975.56 609.540   5
  -1  13   1 6208.74 561.600   2
   1 -13   0 11861.0 978.889   5
  -1  13   0 10667.9 706.244   2
  -1  13   0 10363.7 772.931   5
   1 -13   1 4362.54 572.843   5
  -1  13  -1 4667.48 520.381   5
  -1  13  -1 4645.39 461.509   2
  -1  13  -2 2225.72 356.757   5
   1 -13   2 1818.60 320.280   2
   1 -13   2 2489.38 419.319   5
  -1  13  -2 1754.33 291.702   2
   1 -13   2 1835.80 250.513   3
   1 -13   3 5022.41 502.842   2
  -1  13  -3 5157.69 506.904   5
  -1  13  -3 4791.15 426.028   2
   1 -13   3 5410.10 582.170   5
   1 -13   3 4032.11 390.585   3
   1 -13   4 7546.96 632.005   2
  -1  13  -4 6022.84 495.898   2
   1 -13   4 6919.62 636.893   5
  -1  13  -4 8027.19 613.775   5
   1 -13   5 6999.37 609.741   1
   1 -13   5 7047.74 647.225   5
   1 -13   5 6720.16 569.354   2
  -1  13  -5 7442.81 524.307   2
   1 -13   6 4093.45 476.847   5
   1 -13   6 3227.38 393.041   2
   1 -13   6 3851.33 425.484   1
  -1  13  -6 3580.01 382.329   2
   1 -13   7 630.107 227.638   1
  -1  13  -7 342.995 125.765   2
   1 -13   7 564.503 211.960   5
   1 -13   7 549.385 155.293   2
  -1  13  -8 3105.89 343.731   2
   1 -13   8 4144.15 470.992   1
   1 -13   8 4157.07 471.951   5
   1 -13   8 3909.87 440.530   2
   1 -13   9 483.597 187.349   5
  -1  13  -9 461.276 161.687   2
   1 -13   9 518.055 176.647   2
   1 -13   9 350.213 160.825   1
   1 -13  10 3099.70 406.140   2
  -1  13 -10 2962.04 364.714   2
   1 -13  10 2384.31 372.394   1
   1 -13  10 2629.45 369.615   5
   1 -13  11 2887.16 387.954   2
  -1  13 -11 2969.39 391.597   2
   1 -13  11 2912.48 391.141   5
   1 -13  11 2647.32 386.853   1
   1 -13  12 66.0406 130.741   1
   1 -13  12 158.383 106.846   2
   1 -13  13 4.15549 143.140   1
   1 -13  13-153.908 144.874   2
   1 -13  14 7858.33 759.162   1
   1 -13  15 964.642 271.594   1
   1 -13  16 655.838 327.473   1
   1 -13  17 5550.44 633.479   1
   1 -13  18 381.021 255.786   1
   1 -13  19 666.934 299.729   1
   1 -13  20 1261.05 396.524   1
   1 -13  21 739.091 354.354   1
   1 -13  22-417.631 308.482   1
   1 -13  23 271.195 267.081   1
  -1  12  15-585.036 328.336   2
  -1  12  14-545.260 313.791   2
  -1  12  13 19.5612 258.101   2
  -1  12  13 1025.03 443.327   5
  -1  12  12 470.701 319.830   5
  -1  12  12 87.8758 202.375   2
  -1  12  11 68.6599 198.319   2
  -1  12  11-98.2950 137.694   3
  -1  12  10 2159.88 484.049   2
  -1  12  10 2557.02 375.897   3
  -1  12  10 2784.48 594.811   5
  -1  12   9-70.2929 172.808   2
   1 -12  -9 140.301 100.317   4
  -1  12   9-50.5867 127.473   3
  -1  12   8 327.495 221.030   5
   1 -12  -8-43.3830 95.3177   4
  -1  12   8 133.132 174.315   2
  -1  12   8 185.159 134.101   3
   1 -12  -7-95.6152 116.068   4
  -1  12   7 182.047 109.581   3
  -1  12   7-74.5208 169.904   2
  -1  12   6 61.1328 127.644   2
   1 -12  -6 120.195 92.5795   4
  -1  12   6 85.5103 99.7241   3
  -1  12   5-276.537 223.414   5
  -1  12   5-224.061 185.714   2
  -1  12   5 59.9869 101.927   3
  -1  12   4 1156.21 290.571   2
  -1  12   4 1332.99 242.485   3
  -1  12   4 1349.41 307.126   5
  -1  12   3 3752.04 479.377   2
  -1  12   3 4142.97 543.651   5
  -1  12   2 8234.14 654.986   2
  -1  12   2 8192.46 712.083   5
   1 -12  -2 8049.69 845.824   5
  -1  12   1 1150.25 273.974   5
  -1  12   1 1121.80 216.165   2
   1 -12  -1 1235.73 316.297   5
  -1  12   0 1140.13 260.258   5
   1 -12   0 709.890 210.671   5
  -1  12   0 947.813 181.739   2
  -1  12  -1 1494.14 297.952   5
   1 -12   1 1401.82 325.901   5
  -1  12  -1 1176.68 226.317   2
  -1  12  -2 4215.03 452.928   5
   1 -12   2 4182.69 372.745   3
   1 -12   2 4654.15 533.362   5
  -1  12  -2 4240.30 396.339   2
   1 -12   2 3791.66 430.195   2
  -1  12  -3 4609.87 464.711   5
  -1  12  -3 4238.11 385.752   2
   1 -12   3 4650.43 386.956   3
   1 -12   3 4551.86 465.181   2
   1 -12   3 4197.43 491.546   5
   1 -12   4 16534.4 746.538   3
   1 -12   4 16328.7 866.410   2
  -1  12  -4 16447.4 760.179   2
   1 -12   4 19184.8 1051.83   5
  -1  12  -4 16586.3 858.406   5
   1 -12   5 8624.51 672.768   1
   1 -12   5 7017.73 605.712   5
  -1  12  -5 6989.60 486.566   2
   1 -12   6 462.604 147.544   1
   1 -12   6 520.582 175.200   5
   1 -12   6 379.350 107.894   2
  -1  12  -6 720.284 188.849   2
   1 -12   7 3158.13 400.199   1
  -1  12  -7 2642.10 295.994   2
   1 -12   7 3278.30 407.094   5
   1 -12   7 3356.43 385.065   2
   1 -12   8 9079.18 646.761   2
   1 -12   8 9343.12 671.399   5
   1 -12   8 10053.5 701.561   1
  -1  12  -8 9005.30 574.865   2
   1 -12   9 2675.03 379.258   1
   1 -12   9 2504.61 344.808   5
   1 -12   9 2495.41 327.349   2
  -1  12  -9 2436.10 314.105   2
   1 -12  10 17382.2 914.626   5
   1 -12  10 16029.1 898.086   1
  -1  12 -10 17703.0 836.762   2
   1 -12  10 17289.8 907.977   2
  -1  12 -10 18670.1 1039.31   1
   1 -12  11 1588.91 318.439   1
  -1  12 -11 2050.32 372.588   1
   1 -12  11 1518.61 279.026   2
   1 -12  12 32292.0 1382.41   1
   1 -12  12 32225.5 1261.84   2
   1 -12  13 2500.31 372.247   2
   1 -12  13 2223.64 399.688   1
   1 -12  14 4078.32 537.047   1
   1 -12  15 5844.10 642.400   1
   1 -12  16 5387.57 618.845   1
   1 -12  17 11527.6 944.850   1
   1 -12  18 865.679 311.916   1
   1 -12  19 5712.19 783.234   1
   1 -12  20 5.44535 171.876   1
   1 -12  21 364.729 257.810   1
   1 -12  22 92.0053 205.570   1
   1 -12  23 1859.01 524.164   1
  -1  11  16-48.5970 187.082   2
  -1  11  15-756.339 362.244   2
  -1  11  14 1727.63 558.175   5
  -1  11  14 859.040 361.739   2
  -1  11  13 446.262 174.437   3
  -1  11  13 479.091 227.881   2
  -1  11  12 458.937 313.268   5
  -1  11  12 288.413 149.122   3
  -1  11  12 124.742 211.914   2
  -1  11  11 1199.81 350.601   2
  -1  11  11 1532.82 493.305   5
  -1  11  11 1566.79 295.901   3
  -1  11  10 1745.71 414.348   2
  -1  11  10 2034.35 507.610   5
  -1  11  10 1717.81 295.819   3
  -1  11   9 432.802 211.626   2
  -1  11   9 671.610 178.052   3
   1 -11  -9 634.795 150.356   4
  -1  11   9 863.726 354.278   5
   1 -11  -8 1760.11 241.865   4
  -1  11   8 2034.74 468.077   5
  -1  11   8 1628.39 371.361   2
  -1  11   8 1815.06 294.281   3
   1 -11  -7 1977.03 250.772   4
  -1  11   7 1591.29 347.988   2
  -1  11   7 1918.75 281.330   3
  -1  11   7 1852.37 405.637   5
  -1  11   6-334.104 255.414   5
   1 -11  -6-18.0163 86.9167   4
  -1  11   6-20.0310 104.626   3
  -1  11   6-95.6827 170.642   2
  -1  11   5 178.778 173.778   2
  -1  11   5 140.014 101.205   3
  -1  11   4 137.113 119.177   2
   1 -11  -4 480.806 276.048   5
  -1  11   4 376.717 136.488   3
  -1  11   4 187.085 129.900   5
  -1  11   3 2295.34 357.650   2
  -1  11   3 2212.64 377.888   5
   1 -11  -3 2345.86 475.213   5
  -1  11   3 2264.22 283.879   3
   1 -11  -2 6325.03 713.101   5
  -1  11   2 6549.57 621.143   5
  -1  11   2 6754.82 569.308   2
  -1  11   1 353.386 185.656   5
   1 -11  -1 265.906 100.850   5
  -1  11   1 101.846 89.5418   2
  -1  11   0 2073.53 315.314   5
  -1  11   0 1933.86 264.329   2
   1 -11   0 1860.66 354.978   5
   1 -11   1 5054.45 567.278   5
   1 -11   1 5533.76 410.481   3
  -1  11  -1 5994.28 458.924   2
  -1  11  -1 6667.34 569.190   5
   1 -11   2 2371.51 359.117   5
  -1  11  -2 2245.06 274.728   2
   1 -11   2 2325.67 270.789   3
   1 -11   2 2273.96 304.150   2
  -1  11  -2 2123.37 301.306   5
   1 -11   3 21082.9 944.375   2
  -1  11  -3 22991.4 968.586   5
   1 -11   3 22352.1 830.648   3
  -1  11  -3 21810.2 826.521   2
   1 -11   3 21811.0 1059.54   5
   1 -11   4 85359.0 1818.09   2
   1 -11   4 81545.8 1976.79   5
  -1  11  -4 82859.9 1600.33   2
   1 -11   5 1390.48 257.921   5
   1 -11   5 1241.25 225.608   1
   1 -11   5 1309.81 218.175   2
  -1  11  -5 1194.61 200.507   2
   1 -11   6 13136.8 770.559   5
  -1  11  -6 12420.0 611.085   2
   1 -11   6 11334.5 675.266   2
  -1  11  -7 59798.4 1356.62   2
   1 -11   7 64443.4 1598.44   2
   1 -11   7 59121.2 1604.47   5
   1 -11   8 5691.22 492.347   5
   1 -11   8 6768.59 552.909   1
   1 -11   8 6672.59 521.630   2
  -1  11  -8 6163.48 454.315   2
  -1  11  -9 378.802 151.928   2
  -1  11  -9 214.541 146.681   1
   1 -11   9 312.429 133.200   5
   1 -11   9 211.950 86.8329   2
   1 -11   9 286.490 170.963   1
  -1  11 -10 13478.9 871.764   1
  -1  11 -10 12315.2 690.213   2
   1 -11  10 11437.5 706.650   2
   1 -11  11 4336.77 552.120   1
   1 -11  11 5030.21 478.450   2
  -1  11 -11 4703.12 523.054   1
   1 -11  12 156.074 122.541   2
   1 -11  12 47.3915 124.636   1
  -1  11 -12 3.40006 76.7828   1
   1 -11  13 6626.30 639.013   1
   1 -11  13 7272.72 603.565   2
  -1  11 -13 7244.40 713.818   1
   1 -11  14 1159.61 298.690   1
   1 -11  14 1536.88 298.559   2
   1 -11  15 1478.37 460.619   1
   1 -11  16 1301.07 344.542   1
   1 -11  17 2804.34 491.903   1
   1 -11  18 318.552 209.659   1
   1 -11  19 423.312 257.073   1
   1 -11  20-14.9006 205.020   1
   1 -11  21-170.330 199.207   1
   1 -11  22 656.338 366.097   1
   1 -11  23 291.794 230.606   1
  -1  10  15 150.274 219.870   5
  -1  10  14 195.604 235.659   5
  -1  10  13 1243.25 433.886   5
  -1  10  12-55.1089 237.329   5
  -1  10  11 453.263 283.088   5
  -1  10  10 780.979 364.489   5
  -1  10   9 1638.45 459.859   5
  -1  10   9 1702.07 289.353   3
   1 -10  -9 1415.81 221.949   4
   1 -10  -8 4807.93 393.715   4
  -1  10   8 3506.96 620.807   5
  -1  10   8 4733.79 454.435   3
  -1  10   8 3866.66 556.729   2
  -1  10   7 4636.50 638.149   5
  -1  10   7 4482.43 565.381   2
  -1  10   7 4919.33 443.876   3
   1 -10  -7 4267.40 377.235   4
  -1  10   6 68.9338 79.3128   3
  -1  10   6 16.4021 160.395   2
   1 -10  -6 65.3451 80.1583   4
   1 -10  -5 3948.22 644.731   5
  -1  10   5 4376.75 574.940   5
  -1  10   5 4206.23 395.849   3
  -1  10   5 3429.89 449.619   2
  -1  10   4 1886.34 258.694   3
  -1  10   4 1102.34 264.752   5
  -1  10   4 1862.11 336.169   2
   1 -10  -4 2238.35 473.820   5
  -1  10   3 4755.71 490.653   2
  -1  10   3 4167.20 496.927   5
   1 -10  -3 5156.19 647.237   5
  -1  10   3 4892.34 392.302   3
  -1  10   2 13014.3 784.373   2
   1 -10  -2 14607.2 1036.77   5
  -1  10   2 13862.5 870.369   5
   1 -10  -1 69.1177 87.1311   5
  -1  10   1 304.532 154.862   5
  -1  10   1 75.5355 92.7899   2
   1 -10   0 7543.88 651.472   5
  -1  10   0 7410.74 502.297   2
  -1  10   0 7340.00 564.150   5
  -1  10  -1 11.8053 101.153   5
   1 -10   1-81.8584 107.262   2
  -1  10  -1 92.6797 75.9052   2
   1 -10   1 125.956 72.1938   3
   1 -10   2 9675.68 527.567   3
  -1  10  -2 11088.1 650.543   5
   1 -10   2 10991.9 649.047   2
  -1  10  -2 9825.70 543.072   2
  -1  10  -3 1528.07 260.873   5
   1 -10   3 1285.43 232.452   2
   1 -10   3 1496.13 222.166   3
  -1  10  -3 1123.43 172.693   2
  -1  10  -4 413.779 118.599   2
   1 -10   4 205.255 65.8334   2
   1 -10   4 351.703 134.503   1
  -1  10  -5 61918.8 1301.12   2
   1 -10   5 64316.9 1492.37   2
  -1  10  -6 9242.43 513.005   2
   1 -10   6 10511.0 604.353   2
   1 -10   6 11156.2 684.174   1
   1 -10   7 11577.5 639.254   2
  -1  10  -7 12066.8 586.934   2
   1 -10   8 646.413 165.883   2
  -1  10  -8 712.881 164.563   2
   1 -10   8 544.692 168.401   5
   1 -10   8 770.929 196.932   1
  -1  10  -8 644.193 181.101   1
  -1  10  -9 8151.73 532.697   2
   1 -10   9 9668.34 635.636   1
   1 -10   9 8111.84 550.685   2
  -1  10  -9 8867.03 665.721   1
   1 -10  10 793.701 216.549   1
   1 -10  10 987.452 209.640   2
  -1  10 -10 645.811 195.966   1
   1 -10  11 1354.43 263.004   1
  -1  10 -11 1397.75 280.710   1
   1 -10  11 1144.19 233.352   2
   1 -10  12 232.968 106.696   2
   1 -10  12 251.785 161.791   1
  -1  10 -12 145.336 108.468   1
   1 -10  13 5793.36 518.283   2
   1 -10  13 5800.02 590.602   1
  -1  10 -13 7400.14 705.845   1
   1 -10  14 996.345 262.355   1
   1 -10  14 1194.56 253.549   2
   1 -10  15 4972.08 605.792   1
   1 -10  16 2383.15 443.236   1
   1 -10  17 371.973 218.673   1
   1 -10  18 148.214 168.034   1
   1 -10  19 7404.15 866.928   1
   1 -10  20 77.2193 211.176   1
   1 -10  21 436.930 268.680   1
   1 -10  22 870.873 457.422   1
   1 -10  23 432.813 308.441   1
  -1   9  16-228.422 266.517   5
  -1   9  15-383.213 312.686   5
  -1   9  14-180.350 230.045   5
  -1   9  13-109.365 231.924   5
  -1   9  12 1284.11 405.733   5
  -1   9  11 648.661 287.193   5
  -1   9  10 328.295 217.115   5
  -1   9   9 3208.89 550.791   5
   1  -9  -9 3229.31 311.566   4
  -1   9   8 926.272 316.777   5
   1  -9  -8 1009.29 176.990   4
   1  -9  -7 14734.1 683.560   4
  -1   9   7 15577.1 1106.29   5
  -1   9   6 21951.1 1161.64   2
   1  -9  -6 18630.5 767.399   4
  -1   9   6 17871.3 806.239   3
  -1   9   6 21953.8 1269.14   5
   1  -9  -6 21223.7 1471.60   5
   1  -9  -5 22488.2 1433.64   5
  -1   9   5 21339.5 834.737   3
  -1   9   5 24110.5 1149.57   2
  -1   9   5 22923.1 1226.46   5
   1  -9  -4 25418.7 1439.64   5
  -1   9   4 27274.9 1159.31   2
  -1   9   4 22833.1 863.651   3
  -1   9   4 24922.5 1226.82   5
  -1   9   3 18265.9 902.820   2
  -1   9   3 16848.6 961.936   5
  -1   9   3 17217.3 710.816   3
   1  -9  -3 17042.3 1119.41   5
  -1   9   2 23002.2 785.471   3
   1  -9  -2 22426.5 1225.48   5
  -1   9   2 26329.1 1012.96   2
  -1   9   2 24195.7 1094.68   5
  -1   9   1 27904.3 977.677   2
  -1   9   1 32949.2 1205.70   5
  -1   9   0 12455.3 701.450   5
  -1   9   0 11403.2 588.036   2
   1  -9   1 1671.70 209.819   3
  -1   9  -1 1400.52 245.916   5
  -1   9  -1 1680.80 217.269   2
   1  -9   1 1642.73 233.649   2
   1  -9   2 630.015 139.456   3
  -1   9  -2 606.038 157.712   5
   1  -9   2 613.852 151.653   2
  -1   9  -2 731.537 150.083   2
   1  -9   3 3530.66 329.402   2
  -1   9  -3 3504.51 357.255   5
  -1   9  -3 3521.47 288.770   2
  -1   9  -4 1352.46 186.360   2
   1  -9   4 1283.62 227.767   1
   1  -9   4 1157.56 185.524   2
   1  -9   5 3618.16 326.821   2
   1  -9   5 4277.23 382.203   1
  -1   9  -5 3397.65 293.007   2
  -1   9  -6 5588.41 375.488   2
   1  -9   6 7127.33 510.741   1
   1  -9   6 5560.54 411.252   2
   1  -9   7 978.354 186.329   2
  -1   9  -7 1178.45 200.255   2
   1  -9   7 930.744 190.470   1
   1  -9   8 7735.63 498.053   2
  -1   9  -8 6855.93 467.006   2
   1  -9   8 7327.24 523.394   1
   1  -9   9 21845.7 874.286   2
   1  -9   9 20696.4 943.423   1
   1  -9  10 7419.58 592.958   1
   1  -9  10 7042.74 508.913   2
  -1   9 -10 7986.79 625.077   1
   1  -9  11 1200.57 276.036   1
   1  -9  11 949.494 189.853   2
  -1   9 -11 1035.82 240.822   1
   1  -9  12 13917.0 862.089   1
   1  -9  12 12845.6 724.574   2
   1  -9  13 28.5196 85.7331   2
  -1   9 -13 76.7801 96.4770   1
   1  -9  13 165.556 179.724   1
   1  -9  14 2488.85 337.141   2
   1  -9  14 2078.23 364.021   1
   1  -9  15 4407.64 558.988   1
   1  -9  16 577.070 259.736   1
   1  -9  17 27.3454 146.674   1
   1  -9  18 1737.09 450.067   1
   1  -9  19 1810.53 458.819   1
   1  -9  20 206.110 215.673   1
   1  -9  21 64.4868 197.208   1
   1  -9  22-309.032 224.384   1
   1  -9  23 575.186 361.720   1
  -1   8  17-63.1896 293.476   5
  -1   8  16-70.5804 286.856   5
  -1   8  15 914.935 352.740   5
  -1   8  14 136.625 220.201   5
  -1   8  13 230.174 203.142   5
  -1   8  12 3332.79 636.216   5
  -1   8  11 447.883 269.545   5
  -1   8  10 4583.92 680.956   5
   1  -8  -9 276.488 111.443   4
  -1   8   9-32.0999 188.891   5
   1  -8  -8 2192.89 254.351   4
  -1   8   8 2152.11 441.927   5
  -1   8   7 155.186 227.215   5
   1  -8  -7-50.3793 86.7336   4
   1  -8  -7-202.558 278.870   5
   1  -8  -6 8174.95 497.287   4
   1  -8  -6 9458.04 921.323   5
  -1   8   6 8127.15 766.780   5
  -1   8   5 270.624 111.453   3
  -1   8   5 515.025 238.043   5
   1  -8  -5 158.837 142.186   5
  -1   8   4 4625.33 362.215   3
  -1   8   4 4147.63 433.561   2
   1  -8  -4 4571.89 591.662   5
  -1   8   4 5027.60 559.013   5
  -1   8   3 263.559 96.0643   3
  -1   8   3 193.370 159.791   5
  -1   8   3 193.374 100.575   2
  -1   8   2 14559.8 722.508   2
  -1   8   2 17059.6 656.760   3
  -1   8   2 15953.6 846.448   5
  -1   8   1 6382.98 460.473   2
  -1   8   1 7490.52 545.018   5
  -1   8   1 7397.77 417.976   3
   1  -8   0 26033.2 1092.67   5
   1  -8   0 24972.5 766.375   3
  -1   8   0 25903.8 815.953   2
  -1   8   0 24242.0 947.787   5
   1  -8   1 27.4623 51.0321   3
   1  -8   1 52.1397 55.8878   2
  -1   8  -1 56.5709 60.3889   2
   1  -8   1-19.9213 97.6924   5
  -1   8  -2 4405.70 381.904   5
   1  -8   2 4443.44 402.523   5
  -1   8  -2 4032.44 292.783   2
   1  -8   2 4135.32 322.021   3
   1  -8   2 3948.81 324.358   2
  -1   8  -3 26091.6 881.544   5
  -1   8  -3 27222.5 743.806   2
   1  -8   3 24844.4 779.730   2
   1  -8   4 5189.08 352.094   2
   1  -8   4 5473.88 434.774   1
  -1   8  -4 5401.56 338.142   2
   1  -8   5 39472.9 1127.86   1
   1  -8   5 39460.7 990.064   2
  -1   8  -5 38605.6 898.870   2
   1  -8   6 782.014 148.704   2
  -1   8  -6 806.179 139.799   2
   1  -8   6 792.383 178.274   1
   1  -8   7 2482.92 268.255   2
  -1   8  -7 2248.14 252.970   2
   1  -8   7 1584.02 237.035   1
   1  -8   8 34957.7 1016.92   2
   1  -8   8 24531.5 944.128   1
   1  -8   9 483.785 149.826   2
   1  -8   9 287.163 182.289   1
   1  -8  10 90582.8 1741.22   2
   1  -8  10 67893.3 1786.79   1
   1  -8  11 90.0101 162.113   1
   1  -8  11 227.436 115.544   2
  -1   8 -12 25671.5 1199.98   1
   1  -8  12 23185.8 1201.95   1
  -1   8 -13 3983.93 498.820   1
   1  -8  13 4689.09 451.646   2
   1  -8  13 4199.68 466.432   1
   1  -8  14 18889.2 933.064   2
  -1   8 -14 16037.4 985.119   1
   1  -8  14 18949.1 1101.27   1
   1  -8  15 14478.5 1012.76   1
   1  -8  16 5790.41 782.750   1
   1  -8  17 10602.1 959.143   1
   1  -8  18 626.470 301.202   1
   1  -8  19 94.7689 217.774   1
   1  -8  20 54.8070 166.081   1
   1  -8  21 407.213 289.864   1
   1  -8  22 462.618 285.563   1
   1  -8  23-238.292 277.934   1
  -1   7  18-113.546 290.648   5
  -1   7  17-223.406 355.076   5
  -1   7  16 1532.23 497.355   5
  -1   7  15-64.7659 375.637   5
  -1   7  14 3831.42 697.326   5
  -1   7  13 2135.79 478.062   5
  -1   7  12 5519.59 812.180   5
  -1   7  11 5038.27 764.969   5
  -1   7  10 32.7365 188.813   5
  -1   7   9 249.255 184.906   5
   1  -7  -9 474.044 132.876   4
  -1   7   8 332.532 161.479   5
   1  -7  -8 425.218 142.481   5
   1  -7  -8 763.235 149.444   4
  -1   7   7 125.803 139.180   5
   1  -7  -7 57.6661 59.1229   4
   1  -7  -7-0.88963 152.250   5
  -1   7   6 1658.04 330.515   5
   1  -7  -6 1797.13 408.540   5
   1  -7  -6 1823.39 227.280   4
  -1   7   5 163.333 190.174   5
   1  -7  -5 60.7652 66.6732   4
   1  -7  -5 89.1347 106.176   5
  -1   7   4 10651.0 535.053   3
  -1   7   4 11509.3 762.592   5
  -1   7   3 11765.0 542.069   3
  -1   7   3 10589.8 621.889   2
  -1   7   3 10709.1 722.786   5
  -1   7   2 607.455 127.063   3
  -1   7   2 607.552 147.126   2
  -1   7   1 372.725 116.982   2
  -1   7   1 299.972 78.4587   5
   1  -7  -1 170.413 96.7481   5
  -1   7   1 355.112 97.5114   3
  -1   7   0 46566.5 1219.49   5
   1  -7   0 41631.5 946.489   3
   1  -7   0 46850.6 1348.64   5
  -1   7   0 43660.1 976.861   2
   1  -7   1 112078. 1981.64   5
   1  -7   1 112853. 1553.44   3
  -1   7  -1 109211. 1773.84   5
   1  -7   1 112199. 1605.39   2
  -1   7  -2 80967.3 1501.60   5
  -1   7  -2 84453.2 1217.81   2
   1  -7   2 82319.3 1601.85   5
   1  -7   2 83966.5 1333.10   2
  -1   7  -3 6576.62 410.647   5
   1  -7   3 7568.28 481.392   1
   1  -7   3 7295.53 452.347   5
   1  -7   3 6489.41 363.858   2
  -1   7  -3 6606.64 343.350   2
  -1   7  -4 29846.9 720.045   2
   1  -7   4 27680.7 880.159   1
   1  -7   4 31216.3 803.996   2
   1  -7   4 31926.6 950.104   5
   1  -7   5 67138.7 1200.83   2
  -1   7  -5 69504.6 1150.72   2
   1  -7   6 33478.6 882.898   2
  -1   7  -6 34282.4 854.930   2
   1  -7   6 36508.6 1055.50   1
   1  -7   7 1119.49 183.060   2
   1  -7   7 1490.72 243.387   1
   1  -7   8 43525.1 1085.75   2
   1  -7   8 49478.9 1373.84   1
   1  -7   9 10594.2 561.074   2
   1  -7   9 11928.5 703.947   1
   1  -7  10 458.543 169.614   1
   1  -7  10 458.261 137.485   2
   1  -7  11 5748.94 530.135   1
   1  -7  11 5115.68 427.717   2
  -1   7 -12 1755.89 299.195   1
   1  -7  12 2131.40 295.601   2
   1  -7  13 1149.23 330.855   1
   1  -7  13 1059.67 222.090   2
  -1   7 -13 786.133 217.612   1
   1  -7  14 1268.88 240.390   2
  -1   7 -14 1660.58 336.244   1
   1  -7  14 1976.22 449.818   1
   1  -7  15 1274.23 369.174   1
   1  -7  16 123.036 208.827   1
   1  -7  17 289.924 248.881   1
   1  -7  18 230.986 217.002   1
   1  -7  19 534.696 302.252   1
   1  -7  20 46.6992 182.847   1
   1  -7  21 357.049 282.141   1
   1  -7  22 319.236 320.390   1
   1  -7  23 22.6127 195.858   1
  -1   6  18-285.094 393.711   5
  -1   6  17-690.244 477.043   5
  -1   6  16-312.797 420.421   5
  -1   6  15 88.8447 346.509   5
  -1   6  14 151.545 208.421   5
  -1   6  13-282.578 343.521   5
  -1   6  12 1827.44 387.028   5
  -1   6  11 4103.24 647.576   5
  -1   6  10 7378.03 824.844   5
   1  -6  -9 966.386 226.010   1
   1  -6  -9 1315.16 201.815   4
  -1   6   9 537.151 201.697   5
   1  -6  -8 2552.73 271.419   4
  -1   6   8 2807.37 433.546   5
   1  -6  -8 2599.85 510.516   5
   1  -6  -8 2472.63 395.104   1
  -1   6   7 22.1842 195.431   5
   1  -6  -7 176.384 65.3501   4
   1  -6  -7 83.4202 147.759   5
  -1   6   6 2323.45 359.403   5
   1  -6  -6 1959.73 225.973   4
   1  -6  -6 1999.40 400.857   5
   1  -6  -5 82.4597 77.8351   4
  -1   6   5 125.013 115.134   5
  -1   6   4 37270.0 1358.80   5
  -1   6   3 24993.2 757.185   3
  -1   6   3 23243.8 1013.81   5
  -1   6   2 32583.3 1111.06   5
  -1   6   2 30653.6 832.329   3
  -1   6   2 34270.9 969.785   2
  -1   6   1 9922.51 570.025   5
  -1   6   1 9283.23 433.734   3
  -1   6   1 9473.45 458.047   2
   1  -6  -1 9726.49 600.597   5
  -1   6   0 13863.7 502.408   2
   1  -6   0 15324.0 708.454   5
   1  -6   0 15168.1 532.266   3
  -1   6   0 15397.9 672.604   5
   1  -6   1 1253.90 158.056   3
   1  -6   1 1153.23 183.087   5
  -1   6  -1 1252.90 139.978   2
  -1   6  -1 1441.89 210.263   5
   1  -6   1 1132.44 150.367   2
   1  -6   2 46821.6 870.711   2
  -1   6  -2 49162.6 1080.69   5
   1  -6   3 25498.9 654.597   2
  -1   6  -3 27507.8 621.049   2
  -1   6  -4 24089.6 594.484   2
   1  -6   4 24060.1 633.149   2
   1  -6   4 21975.0 744.031   1
   1  -6   5 2773.96 238.933   2
   1  -6   5 3243.47 290.302   1
  -1   6  -5 2927.22 248.364   2
   1  -6   6 3636.43 319.091   1
   1  -6   6 4068.98 301.849   2
   1  -6   7 41983.4 982.892   2
   1  -6   7 51484.8 1269.08   1
   1  -6   8-66.1056 117.585   1
   1  -6   8 66.8416 65.5693   2
   1  -6   9 8006.20 470.067   2
   1  -6   9 6706.15 520.309   1
   1  -6  10 4591.67 455.366   1
   1  -6  10 5125.10 407.810   2
   1  -6  11 2391.23 361.282   1
   1  -6  11 2992.15 319.244   2
   1  -6  12 130.027 105.326   2
   1  -6  12-14.1864 132.409   1
   1  -6  13 7951.29 713.960   1
   1  -6  13 7474.80 557.342   2
  -1   6 -14 588.850 294.652   1
   1  -6  14 1215.65 238.558   2
   1  -6  14 1402.33 356.281   1
   1  -6  15 16842.5 1101.66   1
   1  -6  16 669.893 430.820   1
   1  -6  17 27226.2 1519.63   1
   1  -6  18 921.898 361.915   1
   1  -6  19 2878.78 556.571   1
   1  -6  20 1672.33 460.071   1
   1  -6  21 2414.45 540.412   1
   1  -6  22 935.545 350.637   1
   1  -6  23 61.5570 208.751   1
  -1   5  19-546.532 442.108   5
  -1   5  18-321.283 376.744   5
  -1   5  17-302.450 371.854   5
  -1   5  16 538.780 353.973   5
  -1   5  15 10.5737 291.284   5
  -1   5  14 1275.46 407.080   5
  -1   5  13 3639.46 637.064   5
  -1   5  12 1114.62 336.045   5
  -1   5  11 1065.34 357.483   5
   1  -5 -10 10804.0 843.423   1
  -1   5  10 13896.8 1117.38   5
  -1   5   9 26307.4 1463.63   5
   1  -5  -9 23783.2 1211.39   1
   1  -5  -8 11011.9 525.899   4
  -1   5   8 9645.36 845.948   5
  -1   5   7 38097.5 1589.45   5
   1  -5  -7 39199.7 981.022   4
  -1   5   6 57776.9 1864.62   5
   1  -5  -6 53466.5 1131.16   4
   1  -5  -5 13968.1 568.708   4
  -1   5   5 13412.6 850.503   5
  -1   5   4 54319.2 1577.53   5
  -1   5   3 116538. 2133.43   5
  -1   5   2 27622.8 733.545   3
   1  -5  -2 24417.6 986.075   5
  -1   5   2 24980.1 913.754   5
  -1   5   1 3614.23 309.267   5
  -1   5   1 3481.00 260.554   3
  -1   5   1 3519.31 247.896   2
  -1   5   0 31031.3 876.881   5
   1  -5   0 32406.5 760.854   3
  -1   5   0 30541.2 636.354   2
   1  -5   1 1257.65 133.022   2
  -1   5  -1 1318.04 127.254   2
   1  -5   1 1199.55 148.842   3
  -1   5  -1 1314.51 181.134   5
  -1   5  -2 1498.07 131.217   2
   1  -5   2 1439.56 134.819   2
  -1   5  -2 1339.77 173.607   5
   1  -5   3 45560.0 754.577   2
  -1   5  -3 43717.0 695.861   2
  -1   5  -4 9104.84 364.167   2
   1  -5   4 8717.09 346.281   2
   1  -5   4 10238.9 493.923   1
   1  -5   5 26658.1 665.132   2
   1  -5   5 30408.5 846.168   1
   1  -5   6 417.032 157.170   2
   1  -5   6 352.984 107.702   1
   1  -5   7 15590.7 595.901   2
   1  -5   7 14171.1 674.115   1
   1  -5   8 10543.6 594.499   1
   1  -5   8 8446.32 465.846   2
   1  -5   9 18270.8 803.400   1
   1  -5  10 24177.1 1002.83   1
   1  -5  11 174.994 154.322   1
   1  -5  12 277.534 147.743   1
  -1   5 -13 6624.52 625.046   1
   1  -5  13 6293.82 672.002   1
  -1   5 -14-56.1217 104.114   1
   1  -5  14-1.18194 172.875   1
   1  -5  15 13478.5 1031.63   1
   1  -5  16-19.4819 125.969   1
   1  -5  17 6520.55 779.589   1
   1  -5  18 2848.70 527.488   1
   1  -5  19 1846.84 451.892   1
   1  -5  20 374.063 260.164   1
   1  -5  21 49.5321 197.195   1
   1  -5  22 32.0335 177.807   1
   1  -5  23-97.8473 229.888   1
  -1   4  19 1279.56 548.012   5
  -1   4  18 407.465 414.995   5
  -1   4  17 1098.24 497.871   5
  -1   4  16 2579.13 661.546   5
  -1   4  15 600.069 346.133   5
  -1   4  14 2270.77 592.709   5
  -1   4  13 2988.17 623.065   5
  -1   4  12 1797.19 479.545   5
  -1   4  11 3408.15 624.107   5
   1  -4 -10 2994.20 442.805   1
  -1   4  10 4310.01 656.028   5
  -1   4   9 185.515 229.032   5
   1  -4  -8 3210.20 281.851   4
  -1   4   8 3626.22 543.852   5
  -1   4   7 4802.52 549.189   5
   1  -4  -7 5165.86 348.578   4
  -1   4   6-115.092 236.285   5
   1  -4  -6-13.1449 67.1247   4
   1  -4  -5 724.738 119.433   4
  -1   4   5 832.346 172.801   5
  -1   4   4 469.099 117.132   5
   1  -4  -4 776.776 130.019   4
  -1   4   3 6229.19 478.163   5
  -1   4   2 608.032 105.610   3
  -1   4   2 903.811 192.407   5
  -1   4   1 2869.11 195.703   2
  -1   4   1 3524.33 240.656   3
  -1   4   1 2834.04 257.040   5
  -1   4   0 390.779 92.5001   5
  -1   4   0 429.527 82.7630   3
   1  -4   0 412.934 89.5160   3
  -1   4   0 372.423 54.0808   2
   1  -4   0 310.060 50.6835   2
   1  -4   1 5297.53 284.404   3
  -1   4  -1 5171.15 303.892   5
  -1   4  -1 5368.35 193.838   2
   1  -4   1 4249.01 192.183   2
   1  -4   2 9835.58 435.749   1
  -1   4  -2 10319.4 278.701   2
   1  -4   2 10644.2 302.203   2
  -1   4  -2 10492.6 419.302   5
   1  -4   3 81094.4 1238.50   1
   1  -4   3 76261.1 887.462   2
   1  -4   4 265.267 70.0334   2
   1  -4   4 239.402 86.6111   1
   1  -4   5 16636.9 644.211   1
   1  -4   5 17127.9 525.148   2
   1  -4   6 22565.5 799.801   1
   1  -4   7 25692.9 860.567   1
   1  -4   8 63089.2 1405.30   1
   1  -4   9 17741.4 834.973   1
   1  -4  10 21431.9 968.998   1
   1  -4  11 4051.08 673.619   1
   1  -4  12 26024.7 1305.10   1
   1  -4  13 42.1295 161.661   1
  -1   4 -13 221.620 147.623   1
   1  -4  14 38838.9 1641.29   1
   1  -4  15 708.109 314.833   1
   1  -4  16 5017.24 659.617   1
   1  -4  17 2752.57 516.205   1
   1  -4  18 998.948 335.275   1
   1  -4  19 235.864 244.106   1
   1  -4  20 847.748 347.456   1
   1  -4  21 89.9449 181.598   1
   1  -4  22 344.926 288.540   1
   1  -4  23-637.950 521.985   5
  -1   3  20 793.163 482.491   5
  -1   3  19 1237.94 518.438   5
  -1   3  18 1425.82 537.730   5
  -1   3  17 2747.35 661.789   5
  -1   3  16 5331.42 878.251   5
  -1   3  15 1240.67 442.211   5
  -1   3  14 4239.74 749.308   5
  -1   3  13 6803.37 914.059   5
  -1   3  12 1826.55 477.406   5
  -1   3  11 311.807 228.925   5
   1  -3 -11 98.6817 136.531   1
  -1   3  10 4230.77 638.649   5
  -1   3   9 562.356 272.975   5
  -1   3   8 7050.84 722.441   5
   1  -3  -7 21174.4 682.275   4
  -1   3   7 19681.5 1106.63   5
  -1   3   6 11380.9 804.313   5
   1  -3  -6 10317.8 469.752   4
   1  -3  -5 179.473 72.2015   4
  -1   3   5 333.505 167.827   5
  -1   3   4 9002.65 593.912   5
   1  -3  -4 10837.8 457.580   4
  -1   3   3 25047.2 907.895   5
  -1   3   2 17263.5 659.466   5
  -1   3   1 184261. 1934.85   5
  -1   3   1 182866. 1623.94   3
   1  -3   0 4972.41 261.542   3
  -1   3   0 4814.10 282.025   5
  -1   3   0 4651.70 246.917   3
  -1   3  -1 37472.2 723.342   5
   1  -3   2 311612. 1457.69   2
   1  -3   2 322924. 2145.79   1
   1  -3   3 118910. 1389.72   1
   1  -3   4 4010.46 296.563   1
   1  -3   5 20278.3 705.187   1
   1  -3   6 8614.13 526.339   1
   1  -3   7 1998.52 258.120   1
   1  -3   8 8281.72 579.067   1
   1  -3   9 8181.05 614.570   1
   1  -3  10 7042.95 581.900   1
   1  -3  11 123.702 215.062   1
   1  -3  12 215.254 213.171   1
  -1   3 -12 13.2590 90.0054   1
  -1   3 -13 157.878 137.398   1
   1  -3  13 473.411 368.317   1
   1  -3  14 2485.33 467.199   1
   1  -3  15 8104.66 808.302   1
   1  -3  16 3774.30 563.100   1
   1  -3  17 3777.59 595.875   1
   1  -3  18 507.818 273.534   1
   1  -3  19-163.835 218.442   1
   1  -3  20 194.440 186.418   1
   1  -3  21 37.0255 205.153   1
   1  -3  21-523.007 431.945   5
   1  -3  22-459.300 456.284   5
  -1   2  21 415.515 366.782   5
  -1   2  20 1820.62 621.329   5
  -1   2  19 167.348 284.035   5
  -1   2  18 964.555 401.526   5
  -1   2  17 1342.48 512.981   5
  -1   2  16-109.322 198.692   5
  -1   2  16-22.5736 77.4346   4
  -1   2  15 1848.80 524.815   5
  -1   2  15 2176.22 306.740   4
  -1   2  14 371.788 270.828   5
  -1   2  14 341.856 143.710   4
  -1   2  13 5149.61 842.632   5
  -1   2  13 4143.96 410.610   4
   1  -2 -12 1375.90 361.440   1
  -1   2  12 2042.75 487.620   5
  -1   2  12 2075.31 281.084   4
  -1   2  11 4938.48 407.550   4
  -1   2  11 4841.78 693.113   5
   1  -2 -11 3632.97 501.599   1
  -1   2  10 10761.5 977.562   5
  -1   2  10 10067.0 561.993   4
  -1   2   9 3486.48 618.008   5
  -1   2   9 3238.62 311.437   4
  -1   2   8 54962.4 1955.89   5
  -1   2   8 53230.2 1178.86   4
  -1   2   7 19538.7 685.836   4
  -1   2   7 21663.0 1149.47   5
   1  -2  -6 2004.65 209.628   4
  -1   2   6 1840.71 336.825   5
  -1   2   6 1944.24 206.140   4
  -1   2   5 3171.68 246.222   4
   1  -2  -5 3126.12 239.309   4
  -1   2   5 3386.88 401.030   5
  -1   2   4 225.240 122.035   5
   1  -2  -4 227.966 68.5165   4
  -1   2   3 2063.29 230.626   5
   1  -2  -3 1734.59 167.378   4
  -1   2   2 72426.0 1285.61   5
  -1   2   1 35666.8 758.179   5
  -1   2   1 34515.3 657.816   3
  -1   2   0 2264.20 165.638   5
  -1   2   0 2324.67 163.888   3
  -1   2  -1 86088.6 946.034   5
   1  -2   1 85883.8 999.400   1
   1  -2   2 69771.3 909.527   1
   1  -2   3 43763.5 793.640   1
  -1   2  -4 1079.47 168.582   1
   1  -2   4 664.338 110.274   1
   1  -2   5 17141.0 695.954   1
  -1   2  -5 27730.0 820.357   1
  -1   2  -6 1385.23 221.252   1
   1  -2   6 1579.18 234.733   1
   1  -2   7 2813.56 314.222   1
  -1   2  -7 3328.85 321.267   1
   1  -2   8 16863.8 816.168   1
   1  -2   9 42.8548 106.088   1
   1  -2  10 1605.07 296.573   1
   1  -2  11 1787.97 341.231   1
   1  -2  12 12193.2 869.491   1
  -1   2 -12 5851.73 713.076   1
   1  -2  13 5602.31 653.554   1
  -1   2 -13 1065.16 370.922   1
   1  -2  14 4037.97 574.465   1
   1  -2  15 15382.7 1166.63   1
   1  -2  16 153.963 216.878   1
   1  -2  17 6320.69 772.439   1
   1  -2  18 313.682 207.812   1
   1  -2  18 719.302 200.822   4
   1  -2  19 2840.98 671.098   5
   1  -2  19 3614.53 607.220   1
   1  -2  20 100.862 231.776   5
   1  -2  21 151.646 281.367   5
   1  -2  22-361.965 455.004   5
  -1   1  21 1004.18 505.606   5
  -1   1  20 287.004 351.997   5
  -1   1  19 89.0493 229.957   5
  -1   1  18 148.049 241.385   5
  -1   1  17 375.452 269.903   5
  -1   1  17 181.304 128.404   4
  -1   1  16 4717.42 479.536   4
  -1   1  16 4241.78 761.866   5
  -1   1  15 1059.89 220.487   4
  -1   1  15 820.245 337.270   5
  -1   1  14 2961.19 354.094   4
  -1   1  14 3234.41 606.176   5
  -1   1  13 7623.55 553.178   4
  -1   1  13 8774.56 960.448   5
  -1   1  12 4843.23 699.601   5
   1  -1 -12 4943.85 546.450   1
  -1   1  12 4246.27 393.612   4
   1  -1 -11 19107.8 1049.19   1
  -1   1  11 20040.6 824.311   4
  -1   1  11 22100.8 1392.22   5
  -1   1  10 4950.27 621.576   5
  -1   1  10 4559.16 375.931   4
  -1   1   9 15422.1 668.070   4
  -1   1   9 17124.6 1123.32   5
  -1   1   8 100042. 2554.87   5
  -1   1   8 85573.7 1508.32   4
  -1   1   7 52327.3 1745.48   5
  -1   1   7 47093.4 1065.78   4
  -1   1   6 44347.6 973.406   4
  -1   1   6 45175.3 1511.66   5
   1  -1  -5 43810.7 877.240   4
  -1   1   5 42221.9 902.823   4
   1  -1  -5 41224.5 1031.72   1
  -1   1   5 42979.4 1356.19   5
   1  -1  -4 78029.1 1131.74   4
  -1   1   4 76176.5 1143.22   4
  -1   1   4 79685.7 1654.85   5
  -1   1   3 58332.0 1248.39   5
  -1   1   3 59397.6 933.742   4
   1  -1  -3 60132.9 938.837   4
  -1   1   2 19037.0 619.905   5
   1  -1  -2 22881.9 549.614   4
   1  -1  -1 3126.17 208.580   5
  -1   1   1 3222.53 202.713   5
  -1   1  -1 1835.18 134.365   1
   1  -1   2 7652.51 310.870   1
  -1   1  -2 9601.42 317.462   1
  -1   1  -3 15911.8 486.877   1
   1  -1   3 16286.2 488.789   1
  -1   1  -4 17563.8 595.969   1
   1  -1   4 21229.1 632.563   1
   1  -1   5 14639.3 613.172   1
  -1   1  -5 8982.95 452.662   1
   1  -1   6 92.7881 82.7391   1
  -1   1  -6 106.559 69.4296   1
  -1   1  -7 32928.4 965.022   1
   1  -1   7 34061.3 1056.24   1
   1  -1   8 38685.3 1218.53   1
   1  -1   9 413.562 235.557   1
   1  -1  10 7808.90 644.018   1
   1  -1  11 2277.96 401.429   1
  -1   1 -11 1898.19 354.269   1
  -1   1 -12 1871.11 382.500   1
   1  -1  12 2096.14 417.924   1
  -1   1 -13 3428.72 507.695   1
   1  -1  13 3567.33 536.184   1
   1  -1  14 1409.83 336.636   1
   1  -1  15 712.095 304.625   1
   1  -1  16 984.405 196.596   4
   1  -1  16 472.089 257.044   1
   1  -1  17-77.2514 347.426   5
   1  -1  17 166.218 172.186   1
   1  -1  17 392.544 142.022   4
   1  -1  18-377.086 352.269   5
   1  -1  19-434.960 381.698   5
   1  -1  20-367.828 411.846   5
   1  -1  21-701.025 466.915   5
   1  -1  22 1188.69 550.680   5
  -1   0  22 601.571 415.995   5
  -1   0  21-55.5054 300.131   5
  -1   0  20-29.9792 277.255   5
  -1   0  19 1497.10 513.406   5
  -1   0  18 53.3246 71.7289   4
  -1   0  18-63.9233 252.727   5
  -1   0  17 4168.81 777.545   5
  -1   0  17 3232.57 413.285   4
  -1   0  16-170.881 342.205   5
  -1   0  16 175.740 106.047   4
  -1   0  15 3258.73 622.407   5
  -1   0  15 2846.91 357.473   4
  -1   0  14-507.695 380.558   5
  -1   0  14 160.574 105.856   4
  -1   0  13 15267.0 1257.94   5
  -1   0  13 14393.1 762.703   4
   1   0 -13 14790.5 1074.93   1
   1   0 -12 4553.98 540.201   1
  -1   0  12 5554.29 453.157   4
  -1   0  12 5288.81 709.170   5
  -1   0  11 10224.1 599.201   4
  -1   0  11 10976.9 1021.89   5
  -1   0  10 3750.67 347.146   4
  -1   0  10 4362.74 591.314   5
  -1   0   9 2820.12 289.332   4
  -1   0   9 2773.52 485.035   5
  -1   0   8 7385.03 443.145   4
  -1   0   8 7971.07 715.718   5
  -1   0   7 2724.06 258.210   4
  -1   0   7 2654.43 380.592   5
   1   0  -7 2709.31 329.687   1
   1   0  -6 14070.8 632.927   1
  -1   0   6 13058.7 526.707   4
  -1   0   6 13970.9 818.751   5
  -1   0   5 39747.8 869.420   4
  -1   0   5 40440.0 1266.42   5
  -1   0   4 45699.8 1190.25   5
  -1   0   4 47395.3 883.944   4
   1   0  -4 46570.6 847.605   4
   1   0  -3 41804.5 1019.93   5
  -1   0   3 42441.6 1001.84   5
   1   0  -3 42697.7 767.745   4
  -1   0   3 42188.4 780.672   4
  -1   0   3 44601.8 654.068   2
  -1   0   2 48663.6 577.729   2
  -1   0   2 48328.2 863.805   5
   1   0  -2 43506.1 858.142   5
  -1   0   2 48241.1 778.176   4
   1   0  -2 47495.4 552.853   2
  -1   0  -1 79532.8 737.812   1
   1   0   2 10229.9 337.156   1
  -1   0  -2 10533.8 346.534   1
   1   0   3 67482.0 1325.76   1
  -1   0  -3 92751.4 1166.49   1
  -1   0  -4 357.133 96.0548   1
   1   0   4 70.1322 143.592   1
  -1   0  -5 151082. 1922.10   1
   1   0   5 161326. 1985.87   1
   1   0   6 24157.8 991.343   1
  -1   0  -6 29186.4 945.689   1
   1   0   7 32182.8 1086.27   1
  -1   0  -7 34152.0 1101.22   1
   1   0   8 22298.8 949.138   1
  -1   0  -8 21804.9 920.660   1
   1   0   9 25000.7 1050.68   1
  -1   0 -10 21575.7 1090.67   1
   1   0  10 24704.3 1135.02   1
  -1   0 -11 92.0042 113.893   1
   1   0  11 120.819 169.280   1
  -1   0 -12 13592.4 904.029   1
   1   0  12 11648.9 867.242   1
   1   0  13-22.8218 142.969   1
   1   0  14 138.119 82.0336   4
   1   0  14 76.1560 166.772   1
   1   0  15 453.585 258.366   1
   1   0  15 1246.80 418.755   5
   1   0  15 899.551 180.477   4
   1   0  16 1156.21 438.724   5
   1   0  16 1274.49 215.443   4
   1   0  17 379.164 268.863   5
   1   0  18-3.97095 263.549   5
   1   0  19 1170.32 447.034   5
   1   0  20 305.649 269.225   5
   1   0  21-308.530 340.391   5
  -1  -1  22-35.9875 263.130   5
  -1  -1  21 875.044 372.885   5
  -1  -1  20 885.083 415.259   5
  -1  -1  19 1827.65 542.705   5
  -1  -1  18 700.985 204.665   4
  -1  -1  18 541.377 277.429   5
  -1  -1  17 65.7630 298.887   5
  -1  -1  17 103.053 111.863   4
  -1  -1  16 1580.57 275.184   4
  -1  -1  16 1322.17 429.271   5
  -1  -1  15 1988.83 488.967   5
  -1  -1  15 2377.17 339.802   4
  -1  -1  14-171.421 392.196   5
  -1  -1  14 351.709 135.620   4
  -1  -1  13 109.745 80.9868   4
   1   1 -13 93.1573 198.581   1
  -1  -1  13-300.580 326.920   5
  -1  -1  12 152.434 146.591   1
  -1  -1  12 201.546 115.077   4
   1   1 -12 60.8771 131.493   1
  -1  -1  12-189.458 276.625   5
  -1  -1  11 189.188 143.159   1
  -1  -1  11 95.7143 91.2030   4
  -1  -1  10 15973.4 702.052   4
  -1  -1  10 12344.0 774.948   1
  -1  -1   9 30087.8 1214.50   1
  -1  -1   9 50877.0 1192.96   4
  -1  -1   8 14541.0 755.142   1
   1   1  -8 14455.4 755.215   1
  -1  -1   8 14420.8 608.147   4
  -1  -1   7 327.332 105.276   4
  -1  -1   7 214.439 115.040   1
   1   1  -7 85.0078 89.6819   1
  -1  -1   6 48574.7 970.885   2
   1   1  -6 50851.3 1135.41   1
  -1  -1   6 47814.2 1106.55   1
  -1  -1   5 44666.8 844.986   2
  -1  -1   5 45654.9 962.666   1
  -1  -1   5 43923.8 889.625   4
  -1  -1   4 48469.3 874.527   1
   1   1  -4 45515.0 770.075   2
   1   1  -4 43745.8 838.622   1
  -1  -1   4 47127.0 864.693   4
  -1  -1   4 46785.7 779.234   2
   1   1  -3 63576.1 800.556   2
   1   1  -3 56585.3 807.051   1
  -1  -1   3 59205.6 797.723   2
  -1  -1   3 63408.3 823.706   1
  -1  -1   3 61443.4 922.477   4
  -1  -1   2 8349.52 296.841   2
   1   1  -2 8570.18 288.858   2
   1   1  -2 9598.90 242.440   1
  -1  -1   2 8074.47 312.345   4
  -1  -1   2 8216.89 319.284   5
  -1  -1   1 18656.0 432.632   4
  -1  -1   0 22076.3 345.342   3
   1   1   0 23158.3 365.077   3
   1   1   0 23048.2 551.205   2
  -1  -1   0 23306.8 425.518   4
   1   1   0 23297.6 420.070   4
   1   1   1 75464.1 793.139   1
   1   1   1 77239.1 682.970   4
  -1  -1  -1 71944.4 821.167   1
   1   1   2 10406.9 374.044   1
  -1  -1  -2 11496.4 387.105   1
  -1  -1  -3 154.892 67.2680   1
   1   1   3 81.4485 68.9588   1
   1   1   4 14071.9 619.015   1
  -1  -1  -4 15995.5 597.574   1
  -1  -1  -5 141.427 72.9180   1
   1   1   5 90.0200 82.1932   1
   1   1   6 1028.68 373.059   1
  -1  -1  -6 1419.39 226.581   1
   1   1   7 12987.3 722.092   1
  -1  -1  -7 10167.8 773.291   1
   1   1   8 43543.3 1382.69   1
   1   1   9 1603.95 316.688   1
   1   1  10 688.552 279.007   1
  -1  -1 -10 797.276 221.078   1
  -1  -1 -11 1080.54 278.035   1
   1   1  11 1222.30 292.688   1
   1   1  11 1197.68 160.489   4
  -1  -1 -12 167.822 181.084   1
   1   1  12 8.02813 212.911   5
   1   1  12 200.824 77.6709   4
   1   1  12 115.959 191.484   1
   1   1  13-274.864 290.310   5
   1   1  13-28.8760 46.7482   4
   1   1  14-204.420 259.413   5
   1   1  14-7.97778 47.1464   4
   1   1  15 1704.33 222.430   4
   1   1  15 1411.28 455.325   5
   1   1  16-114.073 332.768   5
   1   1  16 107.498 66.6700   4
   1   1  17 384.214 291.200   5
   1   1  18-36.4552 326.731   5
   1   1  19 1402.37 508.662   5
   1   1  20-38.8807 272.934   5
   1   1  21-70.4014 244.402   5
  -1  -2  22-192.437 346.393   5
  -1  -2  21-335.946 341.866   5
  -1  -2  20 900.047 390.168   5
  -1  -2  19-1372.49 514.120   5
  -1  -2  18 855.638 226.719   4
  -1  -2  18 1126.67 402.813   5
  -1  -2  17 8126.44 663.965   4
  -1  -2  17 8868.04 1119.82   5
  -1  -2  16 11075.1 756.160   4
  -1  -2  16 12242.6 1278.40   5
  -1  -2  15 1630.43 271.809   4
  -1  -2  15 1050.96 283.540   1
  -1  -2  15 1184.65 337.393   5
  -1  -2  14 254.119 125.546   4
   1   2 -14 93.0687 150.531   1
  -1  -2  14 96.0677 145.468   1
  -1  -2  13 358.321 129.623   4
  -1  -2  13 367.276 174.640   1
   1   2 -13 462.270 231.846   1
  -1  -2  12 778.563 212.850   1
  -1  -2  12 715.487 169.631   4
   1   2 -12 735.977 222.332   1
   1   2 -11 578.938 194.626   1
  -1  -2  11 576.195 149.194   2
  -1  -2  11 462.315 221.059   1
  -1  -2  11 496.056 141.311   4
   1   2 -10 341.752 162.842   1
  -1  -2  10 454.860 171.538   1
  -1  -2   9 9710.58 531.423   2
   1   2  -9 10314.8 667.121   1
  -1  -2   8 564.261 124.906   2
  -1  -2   8 528.311 151.858   1
   1   2  -8 136.765 158.225   1
  -1  -2   7 7573.16 464.635   1
  -1  -2   7 6654.67 390.758   2
   1   2  -7 6268.09 482.134   1
   1   2  -6 3908.77 334.425   1
  -1  -2   6 4551.65 299.417   2
  -1  -2   6 4871.52 352.230   1
  -1  -2   5 44973.2 869.656   2
   1   2  -5 45921.7 941.455   1
   1   2  -5 43217.8 833.851   2
  -1  -2   4 162.353 58.0200   2
   1   2  -4 216.978 72.1853   2
  -1  -2   4 217.839 66.0664   1
   1   2  -4 125.157 55.2583   1
  -1  -2   3 159964. 1214.46   1
   1   2  -3 155434. 1454.92   2
   1   2  -2 44483.8 781.622   2
  -1  -2   1 42600.6 626.815   4
   1   2  -1 41709.3 782.706   2
   1   2   0 1329.91 161.278   2
  -1  -2   0 1339.89 103.370   4
   1   2   1 344.507 80.2542   2
   1   2   1 350.546 70.8389   5
  -1  -2  -1 383.068 70.3285   1
  -1  -2  -2 37977.5 797.766   1
   1   2   2 38303.9 902.388   5
  -1  -2  -3 2581.17 264.677   1
   1   2   3 2705.25 279.137   5
   1   2   4 9205.82 604.950   5
   1   2   4 9321.43 469.919   1
  -1  -2  -4 8041.13 463.970   1
   1   2   5 15100.3 682.257   1
  -1  -2  -5 14791.4 655.051   1
   1   2   5 15269.1 844.351   5
  -1  -2  -6 65068.3 1500.01   1
   1   2   6 64225.1 643.390   4
   1   2   6 65324.9 1465.98   1
   1   2   6 66373.1 1905.73   5
   1   2   7 4017.99 597.781   5
   1   2   7 2631.37 469.261   1
   1   2   7 3644.53 178.359   4
   1   2   8 24477.5 519.770   4
   1   2   8 26608.4 1385.34   5
   1   2   9 170.062 57.5199   4
  -1  -2  -9 95.7507 118.970   1
   1   2   9 25.8487 208.424   5
   1   2  10 33241.6 1719.38   5
   1   2  10 36005.5 753.992   4
   1   2  11 878.325 268.812   5
  -1  -2 -11 1026.80 274.812   1
   1   2  11 910.775 127.300   4
   1   2  12 25143.0 1614.65   5
   1   2  12 22370.4 669.114   4
   1   2  13 6338.92 369.034   4
   1   2  13 5987.22 809.597   5
   1   2  14 745.612 133.528   4
   1   2  14 234.134 186.851   5
   1   2  15 2533.60 598.034   5
   1   2  15 2328.35 235.334   4
   1   2  16 2974.49 655.365   5
   1   2  17 1129.22 437.711   5
   1   2  18 714.289 397.697   5
   1   2  19 1148.14 511.408   5
   1   2  20-58.0048 294.899   5
  -1  -3  23-43.7667 325.183   5
  -1  -3  22-566.674 449.018   5
  -1  -3  21 180.471 254.035   5
  -1  -3  20 296.974 255.565   5
  -1  -3  19-252.450 405.991   5
  -1  -3  18 3593.52 458.389   4
  -1  -3  18 3694.16 594.401   1
  -1  -3  18 3865.60 757.055   5
  -1  -3  17 851.479 220.345   4
  -1  -3  17 589.802 261.497   1
  -1  -3  16 3102.28 501.574   1
  -1  -3  16 3215.32 402.039   4
  -1  -3  15 9042.55 655.163   4
  -1  -3  15 8714.12 803.621   1
  -1  -3  14 17910.0 878.208   2
  -1  -3  14 19045.1 916.558   4
  -1  -3  14 16693.4 1154.19   1
  -1  -3  13 10930.0 797.387   1
  -1  -3  13 9736.20 629.389   2
  -1  -3  12 14799.7 905.571   1
   1   3 -12 16401.2 920.309   1
  -1  -3  12 14275.4 730.492   2
  -1  -3  11 7797.56 630.953   1
   1   3 -11 9161.47 632.756   1
   1   3 -10 14158.8 783.329   1
  -1  -3  10 16176.0 855.336   1
  -1  -3   9 26390.4 1001.59   1
   1   3  -9 23824.2 928.502   1
   1   3  -8 30239.4 928.244   1
  -1  -3   8 21654.3 888.487   1
  -1  -3   7 23766.3 745.508   2
  -1  -3   7 25604.1 805.580   1
   1   3  -6 93.6769 72.0848   2
   1   3  -6 77.4131 66.4896   1
  -1  -3   6 38.7815 63.9185   1
   1   3  -5 28919.8 715.855   2
   1   3  -5 29971.8 694.825   1
   1   3  -4 33231.8 744.566   2
  -1  -3   4 31171.9 617.442   1
   1   3  -3 28002.4 488.684   1
  -1  -3   3 29891.8 513.598   1
  -1  -3   2 175841. 1068.66   1
   1   3  -2 199994. 1839.34   2
   1   3  -1 7805.05 200.607   5
  -1  -3   1 8169.15 224.752   5
   1   3  -1 7719.06 380.469   2
  -1  -3   0 174901. 1418.44   5
   1   3   0 175407. 1250.77   5
  -1  -3  -1 983.178 134.068   5
   1   3   1 814.833 128.814   2
   1   3   1 1047.10 122.307   5
   1   3   2 19100.9 662.877   5
  -1  -3  -2 18140.2 583.141   1
  -1  -3  -3 6464.50 387.468   1
   1   3   3 6644.25 459.240   5
  -1  -3  -4 8242.19 484.090   1
   1   3   4 7452.96 552.437   5
  -1  -3  -5 8928.50 566.556   1
   1   3   5 9198.26 674.924   5
  -1  -3  -6 29159.7 1089.47   1
   1   3   6 27852.2 1234.69   5
   1   3   7-11.2854 166.686   5
   1   3   8 465.822 176.648   5
  -1  -3  -9 6.47791 96.2776   1
   1   3   9-207.773 191.811   5
  -1  -3 -10-20.3427 133.938   1
   1   3  10-98.5074 203.170   5
   1   3  11 172.233 212.600   5
  -1  -3 -11-18.4773 109.014   1
   1   3  12 15043.4 1285.11   5
   1   3  13 341.856 200.063   5
   1   3  14 79.5048 199.323   5
   1   3  15 61.6317 267.686   5
   1   3  16-93.1200 239.977   5
   1   3  17 258.544 282.088   5
   1   3  18 851.799 443.144   5
   1   3  19 344.336 384.475   5
   1   3  20 690.279 450.798   5
  -1  -4  23-221.282 379.872   5
  -1  -4  22 27.6926 289.284   5
  -1  -4  21-167.578 412.394   5
  -1  -4  20 2813.02 674.175   5
  -1  -4  20 2629.69 531.578   1
  -1  -4  19 83.6727 182.748   1
  -1  -4  18 65.4574 107.783   4
  -1  -4  18-5.89452 169.823   1
  -1  -4  17 765.606 293.391   1
  -1  -4  17 1317.52 278.956   4
  -1  -4  16 5760.50 671.915   1
  -1  -4  16 4876.43 506.083   4
  -1  -4  15 21629.4 1233.52   1
  -1  -4  14 3612.29 414.909   2
   1   4 -14 3851.65 485.198   1
  -1  -4  14 3526.38 516.488   1
   1   4 -13 10210.9 711.405   1
  -1  -4  13 12198.4 857.266   1
  -1  -4  13 10836.8 670.252   2
  -1  -4  12 2291.89 388.593   1
   1   4 -12 1733.68 283.156   1
  -1  -4  11 3389.31 435.369   1
   1   4 -11 343.197 294.428   1
  -1  -4  10 529.537 219.673   1
   1   4 -10 830.061 197.633   1
   1   4  -9 10828.5 672.746   1
  -1  -4   9 3413.92 682.001   1
  -1  -4   8 3456.95 355.700   1
   1   4  -8 3224.58 351.422   1
  -1  -4   7 2017.85 290.416   1
   1   4  -7 2037.28 227.748   2
  -1  -4   6 1355.36 185.287   1
   1   4  -6 1125.77 163.340   2
   1   4  -6 1048.78 159.554   1
   1   4  -5 1273.75 145.962   1
   1   4  -5 1050.03 158.241   2
  -1  -4   5 1324.99 144.049   1
   1   4  -4 98666.2 1118.20   1
  -1  -4   4 93668.9 1120.46   1
   1   4  -3 489.794 85.4277   1
   1   4  -3 1031.28 147.670   2
  -1  -4   3 624.833 78.5902   1
   1   4  -2 85364.9 1366.26   2
  -1  -4   2 91944.6 899.513   5
   1   4  -1 27904.6 817.854   2
   1   4  -1 27066.1 499.602   5
  -1  -4   1 25431.2 530.102   5
   1   4   0 44449.4 761.192   5
   1   4   0 40145.7 1052.91   2
  -1  -4   0 41496.1 835.470   5
  -1  -4  -1 47287.1 1077.67   5
   1   4   1 47158.6 944.060   5
   1   4   1 46707.7 1217.21   2
   1   4   2 45006.4 1277.16   2
  -1  -4  -2 44708.6 1215.90   5
   1   4   2 42607.9 1056.18   5
   1   4   3 59352.7 1400.19   5
  -1  -4  -3 60481.2 1266.21   1
  -1  -4  -4 13402.1 659.772   1
   1   4   4 12820.5 730.117   5
  -1  -4  -5 19263.8 840.158   1
   1   4   5 21782.6 1022.06   5
   1   4   6 18219.9 1015.36   5
  -1  -4  -6 19020.6 898.889   1
   1   4   7 28288.3 1365.48   5
  -1  -4  -8 1279.15 270.677   1
   1   4   8 1344.45 324.118   5
  -1  -4  -9 4384.03 533.664   1
   1   4   9 5441.95 680.942   5
   1   4  10 85.7082 170.637   5
  -1  -4 -10 234.307 165.358   1
   1   4  11 42.5261 170.819   5
   1   4  12 1734.71 488.134   5
   1   4  13 42.6996 198.398   5
   1   4  14 538.592 333.392   5
   1   4  15 1981.26 575.401   5
   1   4  16 2266.26 644.296   5
   1   4  17 1172.71 495.567   5
   1   4  18 726.045 427.665   5
   1   4  19 323.726 389.360   5
  -1  -5  23 777.217 377.616   5
  -1  -5  22 104.686 169.316   1
  -1  -5  22 44.9725 299.720   5
  -1  -5  21 803.885 334.100   1
  -1  -5  20 1167.79 392.983   1
  -1  -5  19-105.561 215.644   1
  -1  -5  18 1392.64 397.517   1
  -1  -5  17-85.9426 175.151   1
  -1  -5  16 6419.05 763.980   1
  -1  -5  15-119.616 201.209   1
   1   5 -15 61.5602 137.971   1
  -1  -5  14 2111.14 325.956   2
  -1  -5  14 2504.82 415.842   1
   1   5 -14 1786.25 397.930   1
  -1  -5  13 547.810 154.918   2
  -1  -5  13 473.218 201.600   1
   1   5 -13 805.862 230.137   1
  -1  -5  12 4949.51 604.323   1
   1   5 -12 7120.02 615.454   1
   1   5 -11 34590.5 1236.63   1
  -1  -5  11 26350.8 1189.45   1
  -1  -5  10 8001.96 599.056   1
   1   5 -10 9800.88 604.648   1
   1   5  -9 2188.95 271.314   1
   1   5  -9 1788.99 244.536   2
  -1  -5   9 1753.08 306.185   1
   1   5  -8 62673.2 1301.66   2
   1   5  -8 68166.8 1438.88   1
   1   5  -7 45063.8 1067.30   2
  -1  -5   7 44892.9 987.966   1
   1   5  -7 41363.4 985.931   1
  -1  -5   6 62789.4 1149.76   1
   1   5  -6 56200.8 1045.71   1
   1   5  -5 23314.0 748.390   2
  -1  -5   5 24117.0 650.681   1
   1   5  -5 26842.2 664.158   1
  -1  -5   4 1490.97 151.616   1
   1   5  -4 1253.45 174.505   2
   1   5  -4 1297.28 138.506   1
   1   5  -3 62753.8 1228.68   2
  -1  -5   3 59072.5 838.257   5
   1   5  -2 32753.8 916.969   2
  -1  -5   2 34338.7 669.589   5
  -1  -5   1 8904.72 375.513   5
   1   5  -1 9300.58 512.073   2
   1   5  -1 9498.93 349.078   5
  -1  -5   1 8465.62 505.101   2
  -1  -5   0 7335.10 408.460   5
   1   5   0 7014.19 353.668   5
  -1  -5   0 6895.34 488.648   2
   1   5   1 1713.88 202.906   5
  -1  -5  -1 1514.30 215.945   5
   1   5   1 1623.53 241.585   2
   1   5   2 26697.2 1055.39   2
  -1  -5  -2 29132.5 1065.19   5
   1   5   2 29114.3 920.874   5
  -1  -5  -3 854.104 188.185   5
   1   5   3 704.758 131.750   5
  -1  -5  -4 10.5489 82.8845   1
   1   5   4-238.737 195.794   5
  -1  -5  -5 10127.2 640.160   1
   1   5   5 9677.13 725.668   5
   1   5   6 1590.94 337.910   5
   1   5   7 414.035 272.886   5
  -1  -5  -7 129.234 110.081   1
  -1  -5  -8 371.840 181.926   1
   1   5   8 382.238 253.777   5
   1   5   9 738.563 412.076   5
  -1  -5  -9 73.6322 159.245   1
  -1  -5 -10 8785.76 745.687   1
   1   5  10 8488.72 897.708   5
   1   5  11 364.331 284.940   5
   1   5  12 1052.54 437.939   5
   1   5  13 611.802 343.738   5
   1   5  14 668.336 374.436   5
   1   5  15-6.75870 236.323   5
   1   5  16 998.291 471.375   5
   1   5  17 1761.40 565.457   5
   1   5  18 321.111 377.707   5
   1   5  19 802.148 491.989   5
  -1  -6  24-332.431 443.058   5
  -1  -6  23 457.916 280.224   1
  -1  -6  23 24.4043 403.775   5
  -1  -6  22-272.861 241.550   1
  -1  -6  21 51.2550 190.223   1
  -1  -6  20 1066.20 354.844   1
  -1  -6  19 5188.95 749.952   1
  -1  -6  18 14491.1 1183.89   1
  -1  -6  17 13129.0 1088.91   1
  -1  -6  16 417.397 277.539   1
  -1  -6  15 2000.72 528.556   1
   1   6 -15 4539.41 530.644   1
  -1  -6  14 1941.34 310.553   2
  -1  -6  14 2190.28 388.159   1
   1   6 -13-12.8177 99.5869   1
  -1  -6  13-217.697 176.610   1
  -1  -6  13-65.4463 100.325   2
  -1  -6  12 5565.43 785.383   1
   1   6 -12 12696.8 770.857   1
  -1  -6  11 3678.25 417.493   1
   1   6 -11 3170.87 378.990   1
   1   6 -10 151.635 83.4480   1
  -1  -6  10 134.961 128.232   1
   1   6 -10 84.6647 98.5908   2
   1   6  -9 12549.5 627.682   2
   1   6  -9 11293.6 590.894   1
  -1  -6   9 11848.4 622.451   1
   1   6  -8 1495.60 222.115   1
   1   6  -8 1279.75 219.357   2
  -1  -6   8 1467.92 258.990   1
   1   6  -7 47945.2 1137.96   2
  -1  -6   7 47168.1 1101.20   1
   1   6  -6 31731.4 925.983   2
  -1  -6   6 37878.4 915.500   1
   1   6  -5 7627.02 375.392   1
  -1  -6   5 7045.00 364.791   1
  -1  -6   4 129.289 68.7364   1
   1   6  -4-23.7962 106.686   2
  -1  -6   4 69.2491 66.0641   2
  -1  -6   3 1711.20 169.562   1
  -1  -6   3 1424.18 153.637   5
  -1  -6   3 1223.95 195.997   2
   1   6  -3 1385.49 205.453   2
  -1  -6   2 17793.9 562.209   5
   1   6  -2 18289.5 516.401   5
   1   6  -2 16829.4 707.014   2
  -1  -6   2 18605.4 795.450   2
   1   6  -1 28.1191 44.8903   5
  -1  -6   1 33.3227 60.4273   5
  -1  -6   1-13.1717 64.2620   2
   1   6  -1-17.8573 107.115   2
   1   6   0 19566.9 870.466   2
   1   6   0 22289.7 684.891   5
  -1  -6   0 20979.7 760.417   5
  -1  -6   0 19905.9 887.036   2
   1   6   1 12029.7 560.429   5
   1   6   1 13910.1 758.729   2
  -1  -6  -1 12456.9 659.132   5
  -1  -6  -2 2154.31 313.891   5
   1   6   2 2625.87 294.494   5
   1   6   2 2505.08 321.277   2
  -1  -6  -3 76889.6 2008.95   5
   1   6   3 79929.0 2003.10   2
  -1  -6  -4 3797.71 481.835   5
   1   6   4 4309.29 443.286   5
   1   6   5 4139.63 471.892   5
   1   6   6 20341.1 1111.62   5
  -1  -6  -7 15198.9 931.109   1
   1   6   7 13843.1 974.756   5
  -1  -6  -8 17477.0 1098.52   1
   1   6   8 19175.3 1208.26   5
   1   6   9 1935.38 419.754   5
  -1  -6  -9 1438.12 388.750   1
   1   6  10 18882.4 1333.22   5
   1   6  11 1424.06 438.966   5
   1   6  12 2127.17 529.720   5
   1   6  13 4433.67 755.270   5
   1   6  14 1966.68 545.957   5
   1   6  15 1696.02 554.272   5
   1   6  16 889.148 394.202   5
   1   6  17-315.142 325.091   5
   1   6  18-102.159 305.436   5
  -1  -7  24-102.454 200.829   1
  -1  -7  23 131.999 207.334   1
  -1  -7  22 644.058 333.020   1
  -1  -7  21 1018.06 356.403   1
  -1  -7  20 962.950 373.059   1
  -1  -7  19 6.07137 155.129   1
  -1  -7  18 8427.10 878.580   1
  -1  -7  17 5860.21 714.353   1
  -1  -7  16 10306.1 884.280   1
   1   7 -15 15771.4 1005.57   1
  -1  -7  15 18296.5 1092.52   1
  -1  -7  14 13729.1 827.926   2
  -1  -7  14 16309.2 958.478   1
  -1  -7  13 16803.4 978.329   1
   1   7 -13 19564.9 984.589   1
  -1  -7  13 18428.2 921.949   2
   1   7 -12 13529.7 776.936   1
  -1  -7  12 8644.26 818.356   1
  -1  -7  11 8855.12 631.092   1
   1   7 -11 12401.0 700.265   1
  -1  -7  10 1175.07 232.112   1
   1   7 -10 1005.49 201.226   2
   1   7 -10 907.695 198.749   1
   1   7  -9 1274.58 217.457   2
   1   7  -9 1499.23 249.135   1
   1   7  -8 24391.1 840.786   1
   1   7  -8 21933.7 823.718   2
   1   7  -7 12132.7 605.449   2
   1   7  -7 10543.7 530.143   1
   1   7  -6 11925.3 602.485   2
  -1  -7   6 11890.1 526.482   1
   1   7  -6 11824.9 523.560   1
  -1  -7   5 6212.06 458.299   2
  -1  -7   5 5926.12 351.607   1
   1   7  -5 5263.23 401.595   2
  -1  -7   4 648.259 109.233   1
  -1  -7   4 311.467 111.819   2
  -1  -7   3 54843.1 1048.40   5
  -1  -7   3 53854.3 1404.68   2
   1   7  -2 26996.9 960.549   2
  -1  -7   2 23743.7 739.082   5
   1   7  -2 24899.3 678.292   5
  -1  -7   2 27446.3 1025.17   2
   1   7  -1 2549.60 236.575   5
  -1  -7   1 2243.47 253.531   5
  -1  -7   1 2135.15 299.234   2
   1   7  -1 2444.30 298.081   2
   1   7   0 5890.80 496.144   2
   1   7   0 5782.01 377.422   5
  -1  -7   0 5526.65 432.680   5
  -1  -7   0 6259.26 524.964   2
  -1  -7  -1 9469.70 618.914   5
   1   7   1 8949.20 508.621   5
   1   7   1 10209.5 678.193   2
   1   7   2 52646.5 1369.96   5
   1   7   2 56481.8 663.146   3
  -1  -7  -2 52095.5 1598.62   5
  -1  -7  -3 3298.34 445.998   5
   1   7   3 4389.25 476.507   2
   1   7   3 3865.73 411.109   5
   1   7   4 3512.81 456.569   2
   1   7   4 3999.96 432.337   5
  -1  -7  -4 4555.20 542.647   5
   1   7   5 2880.10 438.352   2
   1   7   5 2708.82 393.543   5
   1   7   6 9769.70 773.204   5
  -1  -7  -6 9169.48 692.068   1
   1   7   7-367.234 286.824   5
  -1  -7  -7 78.9203 115.301   1
  -1  -7  -8 187.514 186.035   1
   1   7   8-3.60270 228.825   5
   1   7   9 709.884 207.893   5
   1   7  10 13204.8 1122.13   5
   1   7  11 504.917 210.255   5
   1   7  12-363.759 337.581   5
   1   7  13-352.599 307.807   5
   1   7  14-65.0429 324.113   5
   1   7  15-497.900 396.532   5
   1   7  16-59.5859 304.228   5
   1   7  17-359.626 406.977   5
   1   7  18-307.650 303.001   5
  -1  -8  24 193.953 255.393   1
  -1  -8  23-61.2275 167.806   1
  -1  -8  22 1667.28 432.543   1
  -1  -8  21-25.3016 196.867   1
  -1  -8  20 175.051 231.946   1
  -1  -8  19 1478.88 436.226   1
  -1  -8  18 1842.95 468.508   1
  -1  -8  17 1206.83 348.971   1
  -1  -8  16 44.2650 149.495   1
  -1  -8  15 2302.94 420.305   1
   1   8 -15 3421.49 463.526   1
   1   8 -14 1336.81 270.700   1
  -1  -8  14 1547.48 289.036   2
  -1  -8  14 1238.69 281.837   1
  -1  -8  13 728.830 269.402   1
   1   8 -13 992.994 241.243   1
  -1  -8  13 912.414 238.566   2
  -1  -8  12 9779.54 686.424   1
  -1  -8  12 8564.71 641.019   2
   1   8 -11 38015.6 1234.86   2
  -1  -8  11 38378.0 1245.73   1
   1   8 -10 28606.8 1048.78   1
   1   8 -10 33642.2 1114.93   2
   1   8  -9 14479.6 714.329   2
   1   8  -9 15953.7 736.232   1
   1   8  -8 48.7366 104.061   2
   1   8  -8 57.4565 56.3643   1
  -1  -8   8 132.524 112.533   1
   1   8  -7 3922.36 370.315   2
   1   8  -7 4053.08 336.155   1
  -1  -8   7 3255.10 305.915   1
   1   8  -6 28373.3 963.711   2
  -1  -8   6 24725.6 790.572   1
  -1  -8   5 315.938 85.9595   5
   1   8  -5 111.730 130.178   2
  -1  -8   5 193.090 72.1998   2
  -1  -8   4 49375.5 1065.25   5
  -1  -8   4 53131.0 1465.37   2
   1   8  -4 52998.3 1362.85   2
  -1  -8   3 2778.30 338.778   2
   1   8  -3 2410.44 296.244   2
  -1  -8   3 2265.07 236.567   5
   1   8  -2 67260.8 1231.33   5
   1   8  -2 74613.0 1691.18   2
  -1  -8   2 71377.5 1426.39   5
  -1  -8   2 78519.9 1880.02   2
  -1  -8   1 10793.7 593.833   5
   1   8  -1 9175.39 479.350   5
   1   8  -1 10044.3 634.392   2
  -1  -8   1 8835.06 654.560   2
   1   8   0 90204.5 2027.81   2
  -1  -8   0 84436.7 1870.52   5
   1   8   1 2267.28 276.474   5
  -1  -8  -1 2534.40 349.224   5
   1   8   1 2655.58 369.684   2
   1   8   2 22221.1 1106.81   2
   1   8   2 21141.3 902.082   5
  -1  -8  -2 21924.6 1094.53   5
   1   8   3 1209.88 259.334   2
   1   8   3 1121.02 117.434   3
  -1  -8  -3 1081.10 270.964   5
   1   8   3 1742.88 306.374   5
   1   8   4 13928.0 835.318   5
   1   8   4 14036.7 960.769   2
   1   8   5 9399.93 736.523   5
  -1  -8  -5 10407.5 733.308   1
  -1  -8  -5 9977.81 933.741   5
   1   8   5 9688.64 830.132   2
  -1  -8  -6 3214.04 420.744   1
   1   8   6 2947.38 448.449   2
   1   8   6 3037.45 439.262   5
  -1  -8  -7 6685.87 651.054   1
   1   8   7 6349.90 676.710   5
  -1  -8  -8 311.495 152.820   1
   1   8   8-136.328 270.770   5
   1   8   9-17.9799 165.891   5
   1   8  10 5889.86 758.164   5
   1   8  11-126.174 228.305   5
   1   8  12 233.368 240.105   5
   1   8  13 1532.79 468.873   5
   1   8  14-156.508 289.371   5
   1   8  15 591.174 341.214   5
   1   8  16-141.685 319.015   5
   1   8  17-190.186 320.151   5
  -1  -9  24 682.932 385.917   1
  -1  -9  23-126.214 243.760   1
  -1  -9  22-13.1456 195.091   1
  -1  -9  21 241.300 234.859   1
  -1  -9  20-6.32874 166.617   1
  -1  -9  19-13.9715 176.245   1
  -1  -9  18 622.631 278.062   1
  -1  -9  17 1624.41 348.400   1
  -1  -9  16 5835.44 645.940   1
   1   9 -15 3442.75 451.310   1
  -1  -9  15 4371.37 555.521   1
   1   9 -14 1390.49 275.018   1
  -1  -9  14 1313.18 279.690   2
  -1  -9  14 1425.02 293.356   1
  -1  -9  13 18528.1 1000.67   2
   1   9 -13 17138.4 943.153   1
   1   9 -12 326.306 178.694   2
  -1  -9  12 333.150 157.884   1
  -1  -9  12 261.227 141.690   2
   1   9 -12 213.273 115.697   1
  -1  -9  11 8792.12 611.702   1
   1   9 -11 7011.84 552.026   1
  -1  -9  11 8049.69 613.668   2
   1   9 -11 8223.96 580.803   2
  -1  -9  10 63859.8 1580.63   1
   1   9 -10 59378.5 1519.40   2
   1   9  -9 12139.8 672.399   2
  -1  -9   9 14109.8 799.465   2
   1   9  -9 14267.9 707.326   1
   1   9  -8 21095.9 829.260   1
  -1  -9   8 20755.2 957.905   2
   1   9  -8 21567.7 887.333   2
  -1  -9   8 18829.0 793.027   1
  -1  -9   7 2730.23 351.069   2
   1   9  -7 2385.94 307.613   2
  -1  -9   7 2264.92 260.947   1
  -1  -9   6 12367.6 735.255   2
   1   9  -6 12280.6 657.076   2
  -1  -9   6 11755.9 558.660   5
   1   9  -5 26051.3 976.425   2
  -1  -9   5 26465.1 836.686   5
  -1  -9   5 26716.8 1070.43   2
  -1  -9   5 23330.3 778.550   1
  -1  -9   4 24052.7 1050.80   2
  -1  -9   4 22592.8 801.351   5
  -1  -9   4 21358.9 774.286   1
   1   9  -4 23694.1 948.097   2
  -1  -9   3 10228.2 554.166   5
   1   9  -3 9702.11 493.286   5
   1   9  -3 10132.3 646.126   2
  -1  -9   3 10705.9 718.164   2
  -1  -9   2 2120.98 142.942   3
  -1  -9   2 2057.03 316.438   2
   1   9  -2 2215.35 320.777   2
   1   9  -2 2012.83 242.349   5
  -1  -9   2 2201.23 281.884   5
   1   9  -1 2359.98 264.488   5
  -1  -9   1 2323.21 295.281   5
   1   9  -1 2587.16 343.362   2
  -1  -9   1 2158.66 350.273   2
   1   9   0 12462.1 789.181   2
  -1  -9   0 11527.7 746.840   5
   1   9   0 12377.6 626.847   5
  -1  -9  -1 1214.94 266.907   5
   1   9   1 843.387 171.240   5
   1   9   1 1163.05 284.716   2
   1   9   2 2982.76 351.707   5
   1   9   2 3232.71 460.119   2
  -1  -9  -2 3533.02 468.289   5
   1   9   3 35.0276 27.2371   3
   1   9   3 154.859 164.322   5
   1   9   3 40.0075 162.846   2
  -1  -9  -4 898.695 249.178   5
   1   9   4 950.472 122.377   3
   1   9   4 1121.53 297.322   2
   1   9   4 1265.13 297.400   5
   1   9   5 2197.86 393.571   5
  -1  -9  -5 2004.12 425.235   5
   1   9   5 2039.82 404.276   2
   1   9   5 2012.49 192.622   3
   1   9   6 150.949 186.957   5
  -1  -9  -6 97.1052 108.813   1
   1   9   6-140.661 230.175   2
  -1  -9  -7 1140.95 276.973   1
   1   9   7 1180.88 312.746   2
   1   9   7 1268.70 315.438   5
   1   9   8-212.361 197.182   5
   1   9   8-7.08306 201.859   2
   1   9   9-121.502 220.333   5
   1   9   9-236.768 304.016   2
   1   9  10 850.137 265.913   5
   1   9  11 874.292 318.419   5
   1   9  12 1965.65 445.654   5
   1   9  13-273.558 296.774   5
   1   9  14-256.838 283.746   5
   1   9  15 70.3721 287.977   5
   1   9  16-133.471 301.358   5
  -1 -10  24 36.4915 180.120   1
  -1 -10  23-158.292 222.346   1
  -1 -10  22 373.243 270.196   1
  -1 -10  21-39.7567 180.479   1
  -1 -10  20 990.616 366.388   1
  -1 -10  19 2545.56 541.958   1
  -1 -10  18-61.8699 200.408   1
  -1 -10  17 1312.67 328.459   1
  -1 -10  16 1686.92 426.365   1
   1  10 -15-104.237 137.712   1
  -1 -10  15 39.1941 134.148   1
   1  10 -14 10061.2 763.596   1
  -1 -10  14 10332.6 778.622   1
   1  10 -13 2934.37 399.432   1
  -1 -10  13 2749.74 395.516   2
   1  10 -13 2436.69 372.561   2
  -1 -10  13 2191.08 340.219   1
   1  10 -12 4838.66 474.217   2
  -1 -10  12 4810.90 511.348   2
   1  10 -12 4460.61 474.958   1
   1  10 -11 6448.53 545.383   1
  -1 -10  11 5541.80 529.573   2
   1  10 -11 4765.59 458.276   2
  -1 -10  11 5529.34 497.912   1
   1  10 -10 150.105 94.2626   1
  -1 -10  10 167.003 120.632   1
   1  10 -10 56.8112 106.990   2
  -1 -10  10 61.2159 85.7574   2
   1  10  -9 18861.6 850.925   2
  -1 -10   9 20606.1 1005.49   2
   1  10  -8 21019.7 915.946   2
  -1 -10   8 20445.1 827.582   1
  -1 -10   8 21481.6 1020.87   2
  -1 -10   7 5283.62 416.565   1
  -1 -10   7 4446.86 364.554   5
  -1 -10   7 4151.24 458.188   2
   1  10  -7 4619.30 427.635   2
   1  10  -6 6392.14 503.947   2
  -1 -10   6 5906.49 443.363   1
  -1 -10   6 6585.97 561.832   2
  -1 -10   6 6301.92 445.718   5
  -1 -10   5 38640.8 1385.69   2
   1  10  -5 36153.6 1211.36   2
  -1 -10   5 38108.7 1083.11   5
  -1 -10   4 611.690 203.102   2
  -1 -10   4 262.619 96.6567   1
  -1 -10   4 222.413 76.0991   5
   1  10  -4 410.721 180.134   2
  -1 -10   3 50.2928 77.2078   2
   1  10  -3 13.9523 89.2007   2
   1  10  -3 171.344 92.2327   5
  -1 -10   3-88.8251 138.074   5
  -1 -10   2 2733.10 383.612   2
  -1 -10   2 3026.26 180.105   3
   1  10  -2 3223.82 322.387   5
  -1 -10   2 3398.19 377.223   5
   1  10  -2 3093.12 391.390   2
  -1 -10   1 10022.6 728.198   5
  -1 -10   1 11208.0 823.256   2
   1  10  -1 11182.4 603.376   5
   1  10  -1 12220.3 771.430   2
   1  10   0 543.440 113.621   2
   1  10   0 943.284 197.875   5
  -1 -10   0 503.790 155.865   5
   1  10   1 15312.3 956.574   2
   1  10   1 13510.9 741.732   5
   1  10   2 600.564 157.753   5
   1  10   2 653.713 236.141   2
  -1 -10  -3 17447.4 1180.34   5
   1  10   3 18890.0 1145.54   2
   1  10   3 18156.6 964.896   5
   1  10   4 8148.98 706.103   5
   1  10   4 7918.38 339.363   3
  -1 -10  -4 7810.14 826.079   5
   1  10   4 6917.06 723.759   2
   1  10   5 26234.9 1432.76   2
   1  10   5 23600.3 1229.14   5
   1  10   5 21419.6 633.448   3
  -1 -10  -5 24863.4 1580.11   5
  -1 -10  -6 0.20994 123.548   1
   1  10   6 72.0898 50.9863   3
   1  10   7 5758.61 750.706   2
   1  10   7 5614.24 657.409   5
   1  10   8 359.921 164.529   2
   1  10   8 691.845 282.955   5
   1  10   9 6409.52 765.086   5
   1  10   9 6825.48 830.343   2
   1  10  10 1298.21 373.278   5
   1  10  10 729.596 294.273   2
   1  10  11 2815.34 542.629   5
   1  10  11 3471.31 654.661   2
   1  10  12 807.076 329.624   5
   1  10  12 165.230 251.083   2
   1  10  13-60.8419 175.044   5
   1  10  13-296.584 427.577   2
   1  10  14 205.952 223.430   2
   1  10  14 174.759 219.631   5
   1  10  15-559.144 455.448   2
   1  10  15-192.187 242.868   5
   1  10  16 0.46817 213.312   5
  -1 -11  25-293.077 324.527   1
  -1 -11  24-306.969 273.912   1
  -1 -11  23 1623.34 490.905   1
  -1 -11  22 71.6643 206.076   1
  -1 -11  21 2182.07 515.370   1
  -1 -11  20 3027.19 604.766   1
  -1 -11  19 1675.83 447.737   1
  -1 -11  18 125.451 182.710   1
  -1 -11  17 7662.51 905.158   1
  -1 -11  16 15949.8 1169.29   1
   1  11 -15 10806.6 812.590   1
  -1 -11  15 9102.20 768.620   1
   1  11 -14 1201.25 285.184   1
   1  11 -14 1090.48 278.102   2
  -1 -11  14 763.757 243.881   1
   1  11 -13 5226.80 578.277   1
   1  11 -13 3903.12 456.550   2
  -1 -11  13 3858.99 479.429   2
  -1 -11  13 3910.14 461.137   1
  -1 -11  12 1218.59 269.531   2
   1  11 -12 1040.54 263.333   1
   1  11 -12 1384.12 279.458   2
  -1 -11  12 1901.41 317.050   1
  -1 -11  11 87.8404 158.335   1
   1  11 -11 53.5357 109.653   2
  -1 -11  11-106.516 151.537   2
   1  11 -11 89.1514 89.2963   1
  -1 -11  10 2310.35 345.496   2
  -1 -11  10 2318.63 310.614   1
   1  11 -10 1936.42 299.326   2
   1  11 -10 2407.93 315.009   1
   1  11  -9 5613.89 497.772   2
  -1 -11   9 5047.91 451.807   1
  -1 -11   9 6271.88 580.646   2
   1  11  -8 26329.3 1079.09   2
  -1 -11   8 25700.5 977.018   1
  -1 -11   7 4.70192 110.804   2
   1  11  -7-41.3401 118.603   2
  -1 -11   7-10.5327 90.3225   1
  -1 -11   7 12.3992 72.2494   5
   1  11  -6 4507.87 439.203   2
  -1 -11   6 3531.90 399.160   1
  -1 -11   6 4731.97 499.705   2
  -1 -11   6 4677.00 391.543   5
  -1 -11   5 57933.8 1448.55   5
   1  11  -5 58605.8 1626.71   2
  -1 -11   5 61586.4 1841.60   2
  -1 -11   4 4919.30 536.536   2
   1  11  -4 4665.94 479.220   2
  -1 -11   4 4991.59 421.839   1
  -1 -11   4 4378.63 401.302   5
   1  11  -3 669.623 159.161   5
   1  11  -3 646.935 207.683   2
  -1 -11   3 461.273 163.465   2
  -1 -11   3 817.533 211.008   5
  -1 -11   3 653.655 99.4907   3
   1  11  -2 3471.64 349.259   5
  -1 -11   2 3977.11 426.646   5
  -1 -11   2 3883.58 488.296   2
   1  11  -2 3528.95 437.334   2
   1  11  -1 3435.59 357.935   5
  -1 -11   1 2968.15 436.570   2
   1  11  -1 3232.86 419.246   2
   1  11   0 5587.90 565.139   2
   1  11   0 5952.87 504.736   5
   1  11   1 6529.10 662.915   2
   1  11   1 6121.26 526.994   5
   1  11   2 83.7684 115.355   5
   1  11   2 244.655 165.183   2
  -1 -11  -2 152.019 161.547   5
   1  11   3 327.406 195.775   2
   1  11   3-6.42743 152.678   5
  -1 -11  -3 172.805 183.786   5
   1  11   4 2850.12 402.219   5
   1  11   4 2856.96 503.258   2
  -1 -11  -4 3061.87 541.997   5
   1  11   5 350.694 241.492   5
   1  11   5-5.33981 41.3239   3
   1  11   5-312.277 270.133   2
  -1 -11  -5-663.753 349.729   5
   1  11   6 508.362 256.102   5
   1  11   6 253.934 78.0285   3
   1  11   6 109.100 173.495   2
   1  11   7 1696.67 395.342   2
   1  11   7 2319.79 236.542   3
   1  11   7 2042.28 440.888   5
   1  11   8 222.821 205.238   5
   1  11   8 114.793 186.825   2
   1  11   8 291.537 93.2693   3
   1  11   9 2476.05 497.185   5
   1  11   9 1482.23 409.969   2
   1  11   9 1551.13 230.549   3
   1  11  10 256.827 267.382   5
   1  11  10 137.571 229.767   2
   1  11  11 539.137 351.063   5
   1  11  11-438.612 308.047   2
   1  11  12 1811.26 486.282   5
   1  11  12 792.156 343.477   2
   1  11  13-379.733 298.384   2
   1  11  13 73.2580 170.364   5
   1  11  14 221.389 271.739   5
   1  11  14-550.971 348.888   2
   1  11  15 369.922 326.823   5
  -1 -12  25 217.821 225.188   1
  -1 -12  24 501.780 359.256   1
  -1 -12  23 368.669 318.298   1
  -1 -12  22 752.298 365.865   1
  -1 -12  21 1269.04 427.553   1
  -1 -12  20 2606.27 547.393   1
  -1 -12  19 2014.43 450.152   1
  -1 -12  18 851.916 355.957   1
  -1 -12  17 10.8831 190.994   1
  -1 -12  16 1917.81 376.328   1
  -1 -12  15 900.203 269.197   1
   1  12 -14 259.949 186.098   2
   1  12 -14 79.8928 99.2541   1
  -1 -12  14 123.223 154.864   1
   1  12 -13 7387.75 641.235   2
  -1 -12  13 9421.15 730.389   1
   1  12 -12 12063.1 766.599   1
  -1 -12  12 10295.5 794.485   2
   1  12 -12 10315.4 703.995   2
  -1 -12  11 9651.45 783.132   2
  -1 -12  11 8831.56 708.212   1
   1  12 -11 11054.1 738.962   1
   1  12 -11 9005.41 651.241   2
  -1 -12  10 2004.36 297.514   1
  -1 -12  10 2038.33 349.864   2
   1  12 -10 1640.77 279.952   2
  -1 -12   9 24587.0 987.291   1
   1  12  -9 23260.8 1038.76   2
  -1 -12   9 21762.0 1130.05   2
  -1 -12   8 4270.10 502.772   2
  -1 -12   8 5088.06 459.693   1
   1  12  -8 4882.15 486.561   2
  -1 -12   7 760.519 180.672   1
   1  12  -7 628.591 188.878   2
  -1 -12   7 930.969 236.100   2
   1  12  -6 14029.9 807.440   2
  -1 -12   6 14385.4 936.622   2
  -1 -12   5 332.064 170.238   2
   1  12  -5-91.3849 200.822   2
  -1 -12   5 295.058 126.282   1
   1  12  -4 22053.6 1065.11   2
  -1 -12   4 23544.2 1235.44   2
  -1 -12   3 231.461 65.7477   3
  -1 -12   3 70.1165 116.981   2
   1  12  -3 316.668 123.760   5
   1  12  -3 317.435 161.790   2
  -1 -12   2 20009.1 1189.81   2
   1  12  -2 21628.7 908.570   5
   1  12  -2 20176.4 1082.00   2
   1  12  -1 5084.77 550.019   2
   1  12  -1 5135.77 473.488   5
   1  12   0 5102.27 480.984   5
   1  12   0 4910.85 553.835   2
  -1 -12   0 4684.25 555.929   5
  -1 -12  -1 77.4692 176.116   5
   1  12   1-138.915 208.757   2
   1  12   1 89.3977 116.912   5
   1  12   2 16601.8 1109.66   2
  -1 -12  -2 15363.1 1159.61   5
   1  12   2 15695.7 922.095   5
   1  12   3 371.215 282.357   2
   1  12   3-61.0908 146.103   5
  -1 -12  -3 47.9233 133.864   5
   1  12   4 4370.96 617.457   2
   1  12   4 4111.03 502.188   5
  -1 -12  -4 4052.52 654.385   5
   1  12   5 659.130 261.177   2
   1  12   5 301.617 148.921   5
   1  12   6-302.591 256.680   2
   1  12   6 142.625 61.5509   3
   1  12   6-272.768 227.981   5
   1  12   7 2389.59 465.751   5
   1  12   7 2315.60 494.196   2
   1  12   7 2239.01 223.585   3
   1  12   8 460.233 238.524   2
   1  12   8 1034.98 347.925   5
   1  12   9 94.9962 168.003   2
   1  12   9 275.222 264.846   5
   1  12  10 527.153 248.169   2
   1  12  10 1189.55 405.912   5
   1  12  11 1382.45 431.719   5
   1  12  11 684.699 331.826   2
   1  12  12 104.523 178.828   5
   1  12  12 0.44546 206.153   2
   1  12  13-66.9345 199.496   2
   1  12  13 684.807 354.644   5
   1  12  14 164.841 237.354   5
  -1 -13  25 123.900 239.393   1
  -1 -13  24 329.690 297.715   1
  -1 -13  23 216.993 291.534   1
  -1 -13  22 791.961 347.509   1
  -1 -13  21 46.6107 159.570   1
  -1 -13  20 131.827 228.100   1
  -1 -13  19 1072.98 372.856   1
  -1 -13  18 5268.87 666.151   1
  -1 -13  17 484.381 252.274   1
  -1 -13  16 123.531 183.776   1
  -1 -13  15 7151.53 670.049   1
   1  13 -15 8951.12 753.918   2
  -1 -13  14 704.101 242.065   1
   1  13 -14 1026.71 290.442   2
   1  13 -14 414.794 241.658   1
   1  13 -13 6214.76 603.615   1
   1  13 -13 6140.62 589.412   2
  -1 -13  13 5624.66 576.641   1
   1  13 -12 5042.65 513.154   2
   1  13 -12 4679.41 525.914   1
  -1 -13  12 6039.25 595.596   1
   1  13 -11 1321.94 261.446   2
  -1 -13  11 1815.36 353.348   2
  -1 -13  11 1506.23 335.168   1
   1  13 -10 12829.5 803.188   2
  -1 -13  10 13222.0 764.132   5
  -1 -13  10 14285.0 796.963   1
  -1 -13  10 13408.2 942.067   2
  -1 -13   9 4138.67 425.647   1
  -1 -13   9 3042.81 366.448   5
  -1 -13   9 3674.15 484.710   2
   1  13  -9 3448.96 422.114   2
  -1 -13   8 20592.8 925.608   1
   1  13  -8 23945.8 1108.33   2
  -1 -13   8 24010.2 1024.00   5
  -1 -13   8 24381.1 1250.98   2
  -1 -13   7 2708.45 358.581   5
  -1 -13   7 2590.28 333.142   1
  -1 -13   7 2744.50 407.902   2
   1  13  -7 2864.56 374.429   2
  -1 -13   6-80.7884 124.535   1
  -1 -13   6 121.723 154.298   2
   1  13  -6-238.197 205.510   2
  -1 -13   5 62.3946 103.110   2
  -1 -13   5-166.489 156.523   1
   1  13  -5-280.812 232.982   2
  -1 -13   4 223.997 115.185   2
  -1 -13   4 480.622 100.001   3
  -1 -13   3 748.538 114.389   3
  -1 -13   3 759.805 217.838   2
  -1 -13   3 993.658 260.293   5
   1  13  -3 911.862 249.604   2
   1  13  -3 1157.52 229.673   5
  -1 -13   2 17.0781 119.481   5
   1  13  -2 91.0300 106.582   5
  -1 -13   2-140.253 188.206   2
   1  13  -2-14.1976 158.185   2
   1  13  -1 116.592 134.744   5
   1  13  -1-71.8654 167.089   2
  -1 -13   1-217.427 193.006   5
  -1 -13   0 1497.41 343.355   5
   1  13   0 1962.75 329.274   5
   1  13   0 1646.48 331.608   2
   1  13   1 324.774 175.257   5
  -1 -13  -1 400.827 317.707   5
   1  13   1-68.1942 235.339   2
  -1 -13  -2 2826.12 516.634   5
   1  13   2 2623.32 401.629   5
   1  13   2 3051.51 478.193   2
   1  13   3 234.027 214.055   2
   1  13   3 77.4933 126.401   5
  -1 -13  -3 164.607 191.989   5
   1  13   4 403.064 234.331   2
   1  13   4-36.3613 168.090   5
   1  13   5 80.4052 182.190   5
   1  13   5 264.016 190.613   2
   1  13   6 298.793 232.444   2
   1  13   6-102.503 248.084   5
   1  13   7-131.081 175.746   2
   1  13   7-541.061 287.558   5
   1  13   8 226.959 232.269   2
   1  13   8-47.6598 202.036   5
   1  13   9 242.229 175.275   5
   1  13   9 36.6003 238.924   2
   1  13  10 686.622 386.307   2
   1  13  10 976.289 404.256   5
   1  13  11 0.41979 202.662   2
   1  13  11 900.474 380.356   5
   1  13  12 32.7514 173.085   2
   1  13  12 425.408 348.018   5
   1  13  13 192.118 270.283   5
  -1 -14  25 404.479 298.229   1
  -1 -14  24 1641.47 512.503   1
  -1 -14  23 535.910 337.127   1
  -1 -14  22-241.202 275.620   1
  -1 -14  21 0.65400 188.914   1
  -1 -14  20-294.911 243.844   1
  -1 -14  19-51.5733 158.887   1
  -1 -14  18 2623.87 472.327   1
  -1 -14  17 426.245 223.959   1
   1  14 -16 2041.72 399.650   2
  -1 -14  16 1902.68 351.907   1
  -1 -14  15 1770.81 399.914   1
   1  14 -15 1954.00 371.213   2
  -1 -14  14 5091.46 569.786   1
   1  14 -14 5184.61 556.463   2
  -1 -14  13 216.800 135.480   1
   1  14 -13 329.530 188.871   2
   1  14 -13 278.045 124.223   1
  -1 -14  12 713.620 232.631   1
   1  14 -12 906.258 234.996   2
   1  14 -11 6369.79 593.656   2
  -1 -14  11 7787.46 619.847   5
  -1 -14  11 8598.95 645.923   1
  -1 -14  10 132.924 118.151   1
  -1 -14  10 269.926 133.985   5
  -1 -14  10 21.1502 125.983   2
   1  14 -10 229.005 175.415   2
  -1 -14   9 4710.37 487.902   1
  -1 -14   9 4581.89 572.519   2
  -1 -14   9 4928.88 493.104   5
   1  14  -9 4616.63 513.628   2
  -1 -14   8-109.301 130.676   1
   1  14  -8-135.748 118.428   2
  -1 -14   8 75.5501 98.4492   5
  -1 -14   8 13.9694 108.536   2
   1  14  -7 13914.7 864.826   2
  -1 -14   7 15894.9 1067.12   2
  -1 -14   7 13901.8 864.888   5
  -1 -14   7 16269.2 856.834   1
   1  14  -6 1143.39 247.809   2
  -1 -14   6 1296.00 331.742   2
  -1 -14   6 1118.92 276.756   1
  -1 -14   6 1246.72 251.244   5
  -1 -14   5 10987.1 773.919   5
  -1 -14   5 11336.1 501.911   3
  -1 -14   5 11500.8 921.936   2
  -1 -14   5 10187.5 700.011   1
   1  14  -5 9920.50 766.979   2
  -1 -14   4 15258.2 964.416   5
  -1 -14   4 15223.8 544.642   3
   1  14  -4 16608.5 1002.07   2
  -1 -14   4 17007.2 1127.05   2
  -1 -14   3 90.1779 121.595   2
   1  14  -3 554.652 209.562   2
  -1 -14   3 313.331 170.913   5
   1  14  -3 592.949 187.073   5
   1  14  -2 4530.40 458.554   5
   1  14  -2 4590.87 566.616   2
  -1 -14   2 4280.74 559.589   5
   1  14  -1 1203.36 308.092   2
  -1 -14   1 1152.59 298.332   5
   1  14  -1 1646.99 295.812   5
   1  14   0 2837.33 399.584   5
  -1 -14   0 2598.53 476.140   5
   1  14   0 2029.49 389.133   2
  -1 -14  -1 3435.75 599.302   5
   1  14   1 3349.25 509.804   2
   1  14   1 3745.18 473.739   5
  -1 -14  -2 1176.14 365.318   5
   1  14   2 1145.29 275.368   5
   1  14   2 925.003 273.835   2
   1  14   3 11531.7 1017.92   2
   1  14   3 11705.7 887.010   5
   1  14   4 372.177 218.560   5
   1  14   4 515.364 289.221   2
   1  14   5 4522.72 689.785   2
   1  14   5 4118.23 576.444   5
   1  14   6 392.534 209.866   5
   1  14   6 657.680 316.028   2
   1  14   7 515.959 299.704   2
   1  14   7-89.8342 199.058   5
   1  14   8-195.835 260.925   5
   1  14   8-0.36631 187.788   2
   1  14   9 1506.27 496.068   2
   1  14   9 970.735 317.955   5
   1  14  10-170.363 219.849   2
   1  14  10-96.1526 249.532   5
   1  14  11-377.166 290.149   2
   1  14  11-3.56452 260.774   5
   1  14  12-346.291 293.089   5
  -1 -15  24-193.442 222.767   1
  -1 -15  23 592.644 296.588   1
  -1 -15  22 607.471 317.152   1
  -1 -15  21-63.1159 234.802   1
  -1 -15  20 631.185 290.828   1
  -1 -15  19 4215.65 636.368   1
  -1 -15  18 2871.52 526.972   1
  -1 -15  17 475.318 210.712   1
   1  15 -16 169.626 167.751   2
  -1 -15  16 149.627 170.860   1
  -1 -15  15 1599.80 361.724   1
   1  15 -15 1440.85 346.330   2
   1  15 -14 226.018 165.652   2
  -1 -15  14 486.739 205.989   1
  -1 -15  13 1462.30 309.522   1
   1  15 -13 1530.04 302.888   2
  -1 -15  12 3106.81 415.538   5
  -1 -15  12 4425.36 512.941   1
   1  15 -12 3256.89 429.711   2
  -1 -15  11 12525.8 816.281   1
   1  15 -11 11251.5 805.962   2
  -1 -15  11 10083.0 758.191   5
  -1 -15  10 538.828 198.829   5
  -1 -15  10 498.441 216.264   1
   1  15 -10 646.348 241.071   2
   1  15  -9 6134.13 603.136   2
  -1 -15   9 6328.57 584.811   5
  -1 -15   9 4903.99 500.070   1
  -1 -15   8 2285.15 339.508   1
   1  15  -8 2139.92 351.060   2
  -1 -15   8 2183.35 339.920   5
   1  15  -7-12.4932 182.987   2
  -1 -15   7 109.713 135.920   1
  -1 -15   7-20.5900 124.610   5
  -1 -15   6 7277.29 651.093   1
  -1 -15   6 9405.86 760.858   5
   1  15  -6 9217.61 747.211   2
  -1 -15   5 9185.35 464.527   3
  -1 -15   5 9694.58 772.271   5
   1  15  -5 9385.06 764.807   2
  -1 -15   4 1025.62 142.283   3
  -1 -15   4 964.766 275.596   5
   1  15  -4 1449.78 356.351   2
  -1 -15   3 2537.51 433.873   5
   1  15  -3 2602.42 425.776   2
   1  15  -3 2938.37 366.492   5
  -1 -15   2 96.7709 166.799   5
   1  15  -2 375.863 150.267   5
   1  15  -2 456.764 230.563   2
  -1 -15   1 2026.97 403.164   5
   1  15  -1 2253.84 423.704   2
   1  15  -1 2222.03 353.342   5
  -1 -15   0 2847.85 525.166   5
   1  15   0 2698.56 472.824   2
   1  15   0 2898.07 424.091   5
   1  15   1 1315.00 299.300   5
   1  15   1 591.059 207.719   2
   1  15   2-142.342 138.184   5
   1  15   2-336.252 244.703   2
   1  15   3 2570.49 437.928   5
   1  15   3 2895.16 512.522   2
   1  15   4 831.570 276.378   5
   1  15   4 712.015 264.615   2
   1  15   5 377.709 263.140   2
   1  15   5 132.375 166.081   5
   1  15   6 462.957 332.761   2
   1  15   6-143.854 184.960   5
   1  15   7 326.577 274.662   2
   1  15   7-498.293 254.801   5
   1  15   8 280.738 313.440   2
   1  15   8 113.799 167.572   5
   1  15   9-36.9379 208.117   2
   1  15   9-151.946 243.234   5
   1  15  10-311.957 274.218   5
   1  15  10 236.116 315.606   2
   1  15  11-260.912 308.280   5
  -1 -16  24 326.579 322.408   1
  -1 -16  23 1058.17 390.382   1
  -1 -16  22-81.0974 207.482   1
  -1 -16  21 778.082 356.711   1
  -1 -16  20 290.749 207.935   1
  -1 -16  19 954.167 347.244   1
  -1 -16  18 946.083 296.783   1
   1  16 -17 568.529 276.660   2
  -1 -16  17 546.835 260.413   1
   1  16 -16 123.923 166.006   2
  -1 -16  16 110.366 171.373   1
   1  16 -15 43.2422 143.202   2
  -1 -16  15-135.857 179.120   1
  -1 -16  14-164.152 171.650   1
   1  16 -14-27.1761 131.855   2
  -1 -16  13 4958.32 572.162   1
   1  16 -13 4497.56 526.868   2
   1  16 -12 363.955 184.108   2
  -1 -16  12 316.603 163.978   1
  -1 -16  11 7287.25 649.281   1
   1  16 -11 6981.29 647.469   2
  -1 -16  11 6722.95 631.507   5
  -1 -16  10 3846.03 475.282   5
   1  16 -10 4107.10 505.018   2
  -1 -16  10 3691.11 452.394   1
  -1 -16   9 4.54039 83.2670   5
   1  16  -9 176.870 145.391   2
  -1 -16   9-2.40131 126.767   1
  -1 -16   8 576.463 207.700   5
   1  16  -8 419.103 172.622   2
  -1 -16   8 782.664 211.452   1
  -1 -16   7 12707.1 889.066   5
  -1 -16   7 10121.7 743.842   1
   1  16  -7 12421.1 880.259   2
   1  16  -6 2889.23 417.227   2
  -1 -16   6 2319.83 374.366   1
  -1 -16   6 3173.05 457.266   5
  -1 -16   6 2649.07 275.109   3
  -1 -16   5 2563.89 432.699   5
  -1 -16   5 2357.57 241.011   3
   1  16  -5 1724.13 329.315   2
  -1 -16   5 1926.30 356.003   1
  -1 -16   4 937.403 278.733   5
  -1 -16   4 600.489 230.884   1
   1  16  -4 969.972 296.725   2
   1  16  -3 883.815 237.307   5
   1  16  -3 626.825 244.666   2
  -1 -16   3 532.982 212.702   5
   1  16  -2 2117.33 344.748   5
   1  16  -2 2183.94 425.567   2
  -1 -16   2 1634.73 376.720   5
   1  16  -1 402.600 183.734   5
   1  16  -1 0.49652 174.687   2
   1  16   0 3302.65 538.207   2
   1  16   0 3543.55 459.992   5
   1  16   1 2350.17 409.753   5
   1  16   1 2171.91 434.387   2
   1  16   2 938.292 295.579   5
   1  16   2 522.246 252.800   2
   1  16   3 298.501 200.546   5
   1  16   3-306.747 287.051   2
   1  16   4-486.049 322.005   2
   1  16   4 240.565 209.406   5
   1  16   5-29.0977 139.026   5
   1  16   5-316.369 218.825   2
   1  16   6 133.656 164.207   5
   1  16   6 381.999 289.246   2
   1  16   7 139.796 201.106   5
   1  16   7 335.459 331.563   2
   1  16   8 160.144 185.917   5
   1  16   8 294.321 255.374   2
   1  16   9 114.504 173.336   5
   1  16   9 595.606 381.541   2
   1  16  10-165.432 203.926   5
  -1 -17  24-276.560 266.107   1
  -1 -17  23-94.1334 216.356   1
  -1 -17  22 136.233 210.207   1
  -1 -17  21 307.886 243.461   1
  -1 -17  20 382.979 277.879   1
  -1 -17  19 15.7691 169.384   1
  -1 -17  18 468.703 232.520   1
  -1 -17  17 1449.20 350.287   1
   1  17 -17 1635.56 387.722   2
   1  17 -16 293.631 208.165   2
  -1 -17  16 153.499 174.550   1
  -1 -17  15 3077.10 495.898   1
   1  17 -15 3774.83 508.298   2
  -1 -17  14 175.382 176.150   1
   1  17 -14 47.8185 142.946   2
   1  17 -13-35.4545 146.386   2
  -1 -17  13 152.496 153.006   1
   1  17 -12 8618.59 749.879   2
  -1 -17  12 8353.18 721.925   1
   1  17 -11 2922.87 452.462   2
  -1 -17  11 2736.16 401.254   1
   1  17 -10 301.679 192.539   2
  -1 -17  10-76.0217 123.958   1
  -1 -17   9 2294.37 383.573   1
   1  17  -9 3884.50 511.454   2
  -1 -17   8 1137.92 272.271   1
   1  17  -8 1030.81 271.061   2
  -1 -17   8 908.594 219.717   5
  -1 -17   7 1258.36 298.619   5
  -1 -17   7 1817.35 386.691   1
  -1 -17   7 1516.40 220.819   3
   1  17  -7 1482.51 323.366   2
   1  17  -6 3670.65 493.745   2
  -1 -17   6 4293.87 567.628   5
  -1 -17   6 3063.76 426.586   1
  -1 -17   6 4014.01 333.000   3
  -1 -17   5-4.85595 46.7846   3
  -1 -17   5-110.547 141.851   1
   1  17  -5-186.333 209.519   2
   1  17  -4 242.480 215.501   2
  -1 -17   4-68.5094 154.446   1
   1  17  -3 270.537 232.532   2
   1  17  -2 17.7634 136.581   5
   1  17  -2 54.9741 162.030   2
   1  17  -1 128.093 135.604   5
   1  17  -1-36.8876 162.746   2
   1  17   0 225.762 157.371   5
   1  17   0 48.1912 191.987   2
   1  17   1 200.772 181.698   5
   1  17   1 221.513 141.001   2
   1  17   2 930.744 319.540   5
   1  17   2 561.843 251.736   2
   1  17   3 44.2687 163.940   2
   1  17   3 210.190 225.523   5
   1  17   4 124.551 156.141   5
   1  17   4-363.154 299.884   2
   1  17   5 423.834 229.742   5
   1  17   5 167.775 180.153   2
   1  17   6-487.164 286.030   2
   1  17   6-90.8702 183.964   5
   1  17   7 36.4471 142.425   5
   1  17   7-43.8125 174.690   2
   1  17   8-96.1323 189.717   5
   1  17   8 26.0728 251.423   2
  -1 -18  24 32.2777 173.396   1
  -1 -18  23-260.000 249.192   1
  -1 -18  22-131.387 234.681   1
  -1 -18  21 608.966 294.668   1
  -1 -18  20 93.9389 176.431   1
  -1 -18  19 31.7750 141.651   1
   1  18 -18 1031.89 320.258   2
  -1 -18  18 600.608 275.719   1
   1  18 -17 1063.95 325.486   2
  -1 -18  17 660.254 270.663   1
   1  18 -16 455.586 229.041   2
  -1 -18  16 108.507 166.639   1
  -1 -18  15 220.420 194.958   1
   1  18 -15 498.993 229.932   2
   1  18 -14 429.087 202.186   2
  -1 -18  14 499.595 216.428   1
  -1 -18  13 2471.16 418.108   1
   1  18 -13 3027.48 471.548   2
  -1 -18  12 18.0432 134.917   1
   1  18 -12-345.188 212.133   2
  -1 -18  11-75.3670 144.520   1
   1  18 -11 292.380 203.557   2
   1  18 -10 722.181 257.511   2
  -1 -18  10 244.868 168.062   1
  -1 -18   9 284.188 152.341   1
   1  18  -9 185.238 180.845   2
   1  18  -8 138.698 168.735   2
  -1 -18   8-13.3104 138.469   1
  -1 -18   7 2175.49 259.528   3
  -1 -18   7 2419.54 406.178   1
   1  18  -7 2184.18 398.808   2
  -1 -18   6 4404.42 341.048   3
  -1 -18   6 3839.32 538.048   1
   1  18  -6 4368.44 575.045   2
   1  18  -5-125.929 198.779   2
  -1 -18   5 7.06738 142.740   1
  -1 -18   4 5087.15 611.854   1
   1  18  -4 3931.19 574.027   2
   1  18  -3 12.0871 126.238   2
   1  18  -2 1230.10 304.797   5
   1  18  -2 1385.60 371.170   2
   1  18  -1 252.224 187.429   5
   1  18  -1 240.182 183.362   2
   1  18   0 1684.83 368.154   5
   1  18   0 1249.46 364.906   2
   1  18   1 711.018 298.210   2
   1  18   1 834.190 271.086   5
   1  18   2 931.009 276.473   5
   1  18   2 432.646 267.106   2
   1  18   3 955.453 342.415   2
   1  18   3 983.683 325.481   5
   1  18   4 10.4201 211.307   2
   1  18   4 274.606 222.167   5
   1  18   5-204.656 265.939   2
   1  18   5 216.320 201.406   5
   1  18   6 142.109 212.237   5
   1  18   6-476.945 289.595   2
   1  18   7-109.865 198.164   5
   1  18   7 0.40912 203.646   2
  -1 -19  23-77.2946 205.782   1
  -1 -19  22 536.382 334.336   1
  -1 -19  21 169.354 231.360   1
  -1 -19  20 757.178 329.652   1
  -1 -19  19 113.399 189.977   1
   1  19 -18 50.6225 169.251   2
  -1 -19  18 182.154 212.158   1
   1  19 -17 34.7317 146.090   2
  -1 -19  17-124.215 187.648   1
  -1 -19  16 40.6449 171.698   1
   1  19 -16 338.261 213.945   2
   1  19 -15 117.207 151.345   2
  -1 -19  15 45.0423 153.594   1
  -1 -19  14 1529.34 363.204   1
   1  19 -14 1825.26 381.905   2
   1  19 -13 584.622 230.032   2
  -1 -19  13 865.582 266.603   1
   1  19 -12-121.468 169.239   2
  -1 -19  12-44.2689 122.405   1
   1  19 -11 643.672 279.777   2
  -1 -19  11 443.533 174.455   1
   1  19 -10 3205.49 488.850   2
  -1 -19  10 2313.01 418.898   1
  -1 -19   9-79.6600 146.645   1
   1  19  -9 59.6202 118.973   2
  -1 -19   8 709.401 243.555   1
   1  19  -8 1066.41 307.366   2
  -1 -19   7 353.628 194.112   1
   1  19  -7 338.269 152.581   2
   1  19  -6-317.787 201.947   2
  -1 -19   6 245.158 193.103   1
   1  19  -5 15.2191 215.328   2
  -1 -19   5 157.813 154.429   1
   1  19  -4-3.91008 215.418   2
  -1 -19   4-25.5925 168.591   1
   1  19  -3 582.026 264.410   2
   1  19  -2 698.688 254.774   5
   1  19  -2 535.339 265.454   2
   1  19  -1 49.9068 206.132   2
   1  19  -1 203.684 166.196   5
   1  19   0 87.9903 147.083   5
   1  19   0 194.166 214.151   2
   1  19   1 44.3345 149.484   2
   1  19   1 104.542 165.305   5
   1  19   2 142.366 173.791   5
   1  19   2 250.653 270.460   2
   1  19   3 334.464 215.930   5
   1  19   3 102.685 190.549   2
   1  19   4 344.281 228.914   5
   1  19   4-203.970 216.206   2
   1  19   5 498.672 300.708   5
   1  19   5 509.801 315.726   2
  -1 -20  23 0.77501 222.108   1
  -1 -20  22 33.4601 187.150   1
  -1 -20  21-156.158 191.090   1
  -1 -20  20 142.211 189.202   1
  -1 -20  19 512.550 282.564   1
   1  20 -18 67.8633 173.991   2
  -1 -20  18 149.778 226.061   1
   1  20 -17 182.366 196.108   2
  -1 -20  17 149.036 176.025   1
  -1 -20  16 623.932 268.605   1
   1  20 -16 503.123 236.291   2
   1  20 -15 53.0165 157.190   2
  -1 -20  15 111.969 165.143   1
  -1 -20  14 933.137 295.687   1
   1  20 -14 663.484 250.477   2
  -1 -20  13 355.336 187.377   1
   1  20 -13 302.512 207.667   2
   1  20 -12-278.288 224.313   2
  -1 -20  12 89.0383 146.746   1
  -1 -20  11 234.259 165.836   1
   1  20 -11 317.056 201.480   2
  -1 -20  10 0.21137 119.441   1
   1  20 -10 429.765 255.915   2
  -1 -20   9 2947.31 459.795   1
   1  20  -9 3080.62 500.229   2
  -1 -20   8-3.72292 142.054   1
   1  20  -8 69.3819 159.830   2
  -1 -20   7 261.893 172.928   1
   1  20  -7 430.095 224.300   2
  -1 -20   6 243.133 190.802   1
   1  20  -6-385.363 259.260   2
  -1 -20   5 1139.85 339.578   1
   1  20  -5 716.386 260.176   2
  -1 -20   4 132.720 196.109   1
   1  20  -4-192.581 264.342   2
   1  20  -3 58.6268 201.470   2
  -1 -20   3-124.219 213.772   1
   1  20  -2 312.044 247.120   2
   1  20  -1 167.541 169.197   5
   1  20  -1 610.870 302.183   2
   1  20   0 119.936 174.040   5
   1  20   0 60.2983 173.349   2
   1  20   1 48.7651 181.852   2
   1  20   1 225.164 191.330   5
   1  20   2 98.6459 145.909   5
   1  20   2-198.327 207.909   2
   1  20   3 105.340 182.665   5
   1  20   3-157.194 190.349   2
   1  20   4 88.1675 186.484   2
  -1 -21  22 479.481 348.759   1
  -1 -21  21 267.099 252.442   1
  -1 -21  20 238.836 205.431   1
   1  21 -19 446.689 277.060   2
  -1 -21  19 405.631 246.979   1
   1  21 -18 194.558 197.362   2
  -1 -21  18 277.733 216.586   1
   1  21 -17 953.118 321.875   2
  -1 -21  17 1009.34 347.776   1
   1  21 -16 1.82085 167.549   2
  -1 -21  16 15.3250 181.323   1
  -1 -21  15 1172.18 340.519   1
   1  21 -15 966.465 320.970   2
   1  21 -14-106.892 198.618   2
  -1 -21  14 212.319 167.404   1
   1  21 -13-270.238 223.450   2
  -1 -21  13-73.9587 163.262   1
  -1 -21  12 357.564 199.654   1
   1  21 -12 15.1747 148.470   2
  -1 -21  11 266.637 190.650   1
   1  21 -11 658.570 265.605   2
   1  21 -10 140.087 184.856   2
  -1 -21  10 334.844 221.413   1
   1  21  -9 78.4578 182.202   2
  -1 -21   9 0.23166 145.789   1
  -1 -21   8-256.363 189.133   1
   1  21  -8 88.2327 141.161   2
   1  21  -7 11.0874 144.739   2
  -1 -21   7 51.1413 129.686   1
  -1 -21   6-51.5010 147.099   1
   1  21  -6 20.6336 145.079   2
  -1 -21   5 986.706 331.273   1
   1  21  -5 701.984 292.184   2
   1  21  -4-623.755 272.901   2
  -1 -21   4 314.689 239.357   1
   1  21  -3-278.638 240.953   2
  -1 -21   3-144.156 180.831   1
   1  21  -2 98.0902 209.610   2
   1  21  -1 137.112 204.257   2
   1  21   0 63.4484 153.696   5
   1  21   0 318.343 275.501   2
   1  21   1 325.096 292.201   2
   1  21   2-200.694 216.929   2
  -1 -22  21 0.30468 175.153   1
  -1 -22  20 90.5980 180.760   1
   1  22 -19 587.078 320.223   2
  -1 -22  19 367.281 242.409   1
   1  22 -18 142.837 216.739   2
  -1 -22  18 49.6362 136.818   1
   1  22 -17 236.067 216.936   2
  -1 -22  17 12.3320 174.179   1
  -1 -22  16 181.496 192.271   1
   1  22 -16 202.121 185.870   2
   1  22 -15 207.418 176.201   2
  -1 -22  15 101.070 131.047   1
  -1 -22  14 182.908 172.755   1
   1  22 -14-101.706 188.487   2
   1  22 -13 787.871 292.634   2
  -1 -22  13 1060.79 296.612   1
  -1 -22  12 1899.61 397.176   1
   1  22 -12 1133.44 331.392   2
  -1 -22  11 523.523 250.529   1
   1  22 -11 903.947 302.139   2
   1  22 -10 207.927 198.891   2
  -1 -22  10 22.2625 128.400   1
  -1 -22   9 99.9221 161.377   1
   1  22  -9-24.7351 149.904   2
  -1 -22   8 8.46128 151.137   1
   1  22  -8 63.3651 137.594   2
   1  22  -7 180.309 177.171   2
  -1 -22   7 223.334 207.367   1
   1  22  -6-230.641 197.775   2
  -1 -22   6-122.570 152.960   1
  -1 -22   5 5.81166 159.296   1
   1  22  -5-219.231 195.034   2
   1  22  -4 444.311 257.987   2
  -1 -22   4 816.584 327.827   1
   1  22  -3-655.290 290.683   2
  -1 -22   3-38.7031 220.755   1
   1  22  -2-67.4098 163.308   2
  -1 -22   2-292.750 288.061   1
   1  22  -1 239.060 289.827   2
   1  22   0 77.6913 250.648   2
  -1 -23  20 86.3274 197.703   1
  -1 -23  19-95.2775 138.695   1
  -1 -23  18 98.9773 143.527   1
   1  23 -17 174.903 191.816   2
  -1 -23  17-131.226 174.758   1
  -1 -23  16 157.030 204.497   1
   1  23 -16 0.83741 149.634   2
   1  23 -15 210.603 222.923   2
  -1 -23  15 497.246 275.053   1
   1  23 -14 36.0280 138.953   2
  -1 -23  14 209.834 182.739   1
   1  23 -13 125.138 194.059   2
  -1 -23  13 143.280 139.036   1
  -1 -23  12 633.237 257.013   1
   1  23 -12 492.197 198.197   2
   1  23 -11 523.494 302.394   2
  -1 -23  11 235.042 189.357   1
   1  23 -10 516.464 264.812   2
  -1 -23  10 293.941 223.401   1
   1  23  -9 21.8251 139.552   2
  -1 -23   9-144.511 153.597   1
   1  23  -8 64.0399 167.839   2
  -1 -23   8 32.5920 175.562   1
  -1 -23   7-68.3596 161.285   1
   1  23  -7-91.9148 156.523   2
   1  23  -6-224.052 206.945   2
  -1 -23   6-120.321 174.809   1
  -1 -23   5 19.7733 201.414   1
   1  23  -5-287.532 212.468   2
  -1 -23   4 57.4138 164.275   1
   1  23  -4-221.625 255.656   2
  -1 -23   3 74.4193 201.889   1
   1  23  -3-535.684 272.371   2
   1  23  -2-314.414 231.253   2
  -1 -23   2-407.337 280.342   1
  -1 -24  19 128.161 229.220   1
  -1 -24  18 72.5893 161.133   1
  -1 -24  17-170.605 188.041   1
  -1 -24  16-48.1722 153.464   1
   1  24 -15 48.4901 143.200   2
  -1 -24  15-1.12948 137.482   1
   1  24 -14 75.9687 153.146   2
  -1 -24  14 509.818 242.256   1
  -1 -24  13 531.898 246.298   1
   1  24 -13 465.545 279.126   2
   1  24 -12 281.071 202.275   2
  -1 -24  12 874.414 297.426   1
  -1 -24  11-40.2875 166.712   1
   1  24 -11 353.963 244.824   2
   1  24 -10 82.4087 204.897   2
  -1 -24  10-143.956 169.360   1
  -1 -24   9 27.6289 161.031   1
   1  24  -9 172.812 209.631   2
   1  24  -8 120.154 201.628   2
  -1 -24   8 1.61272 162.652   1
  -1 -24   7-77.3887 158.764   1
   1  24  -7 11.6346 182.969   2
  -1 -24   6 137.203 222.085   1
   1  24  -6-97.7452 163.535   2
   1  24  -5-96.2369 190.138   2
  -1 -24   5 156.713 233.637   1
  -1 -25  15-92.0427 190.439   1
  -1 -25  14-27.4524 163.679   1
  -1 -25  13 44.3149 143.086   1
  -1 -25  12 34.2414 130.054   1
  -1 -25  11 33.4154 149.378   1
  -1 -25  10-139.530 204.077   1
   2 -23   6-68.3237 197.228   1
   2 -23   7 29.7989 171.114   1
   2 -23   8-541.423 310.211   1
   2 -23   9 0.38545 185.805   1
   2 -23  10 199.116 274.691   1
   2 -23  11-0.34387 178.904   1
   2 -23  12 197.391 214.092   1
   2 -23  13-238.825 254.768   1
   2 -23  14 713.154 330.573   1
   2 -22   2-152.823 238.434   1
   2 -22   3-154.963 252.581   1
   2 -22   4 377.042 294.190   1
   2 -22   5-127.268 254.787   1
   2 -22   6 375.017 217.338   1
   2 -22   7 82.5563 257.033   1
   2 -22   8-119.562 231.194   1
  -2  22  -8 78.0545 120.546   2
   2 -22   9 3213.44 651.964   1
  -2  22  -9 1583.16 327.504   2
   2 -22  10 120.955 216.818   1
  -2  22 -10 178.800 141.924   2
  -2  22 -11 708.956 238.774   2
   2 -22  11 633.734 324.312   1
  -2  22 -12 491.441 227.698   2
   2 -22  12 282.547 216.334   1
   2 -22  13 627.584 276.236   1
   2 -22  14 255.397 226.474   1
   2 -22  15 861.288 337.974   1
   2 -22  16 1530.65 439.271   1
  -2  21   1 345.463 297.903   5
  -2  21   0 178.746 224.936   5
  -2  21  -1 111.660 180.093   5
  -2  21  -2 269.720 266.464   5
   2 -21   3 40.4369 199.009   1
   2 -21   4 130.838 218.867   1
   2 -21   5 31.9691 194.131   1
  -2  21  -5 205.083 170.768   2
  -2  21  -6 82.8142 108.119   2
   2 -21   6 154.010 245.033   1
  -2  21  -7 164.998 130.689   2
   2 -21   7 231.026 224.833   1
   2 -21   8-259.654 197.475   1
  -2  21  -8 86.3840 122.663   2
   2 -21   9 2645.10 555.004   1
  -2  21  -9 1694.23 321.821   2
   2 -21  10 73.5173 185.963   1
  -2  21 -10 227.516 171.581   2
  -2  21 -11 246.597 160.877   2
   2 -21  11 249.958 280.481   1
   2 -21  12 119.998 210.116   1
  -2  21 -12 308.675 210.057   2
   2 -21  13 637.059 293.359   1
   2 -21  14 70.2502 200.734   1
   2 -21  15-50.9449 188.621   1
   2 -21  16 1042.54 387.416   1
   2 -21  17 285.490 204.689   1
   2 -21  18 102.820 230.245   1
  -2  20   3 12.9761 190.032   5
  -2  20   2 366.145 267.609   5
  -2  20   1-129.849 209.656   5
  -2  20   0 654.422 291.754   5
  -2  20  -1 234.465 191.852   5
  -2  20  -2 1171.93 343.175   5
  -2  20  -2 869.241 245.280   2
  -2  20  -3 61.4861 97.9585   2
   2 -20   3-167.812 204.046   1
  -2  20  -4 1838.66 336.811   2
   2 -20   4 2368.18 550.055   1
  -2  20  -5 741.519 221.465   2
   2 -20   5 662.299 299.702   1
   2 -20   6 145.963 149.963   1
  -2  20  -6-87.8814 114.727   2
  -2  20  -7-58.2760 127.544   2
   2 -20   7 88.1161 192.428   1
   2 -20   8-38.5176 176.989   1
  -2  20  -8 78.1952 117.374   2
  -2  20  -9 1035.41 255.802   2
   2 -20   9 1516.48 433.133   1
   2 -20  10 324.126 212.657   1
  -2  20 -10 115.797 121.591   2
   2 -20  11 1205.22 362.751   1
  -2  20 -11 1669.24 342.307   2
  -2  20 -12 1696.90 345.276   2
   2 -20  12 1564.71 400.512   1
   2 -20  13 1247.76 355.680   1
   2 -20  14 418.325 276.399   1
   2 -20  15 195.297 205.421   1
   2 -20  16 233.314 232.979   1
   2 -20  17 59.5757 209.573   1
   2 -20  18 955.108 366.032   1
   2 -20  19 1579.10 441.430   1
  -2  19   4 455.668 276.100   5
  -2  19   3 716.155 343.256   5
  -2  19   2-146.774 202.967   5
  -2  19   1 237.230 225.575   5
  -2  19   1 324.705 169.186   2
  -2  19   0 559.461 297.117   5
  -2  19   0-53.7414 144.813   2
  -2  19  -1 1042.89 343.106   5
  -2  19  -1 243.163 144.838   2
  -2  19  -2 97.0903 105.221   2
  -2  19  -2 467.711 261.451   5
  -2  19  -3 58.1576 99.7673   2
  -2  19  -3 191.348 206.689   5
  -2  19  -4 312.470 163.198   2
   2 -19   4 62.0723 236.852   1
   2 -19   5-315.757 256.438   1
  -2  19  -5 223.087 171.274   2
  -2  19  -6 233.800 141.961   2
   2 -19   6 139.552 177.239   1
  -2  19  -7-63.0754 133.221   2
   2 -19   7-121.387 188.684   1
   2 -19   8 576.110 286.779   1
  -2  19  -8 476.837 159.590   2
   2 -19   9 352.777 243.592   1
  -2  19  -9 640.886 196.012   2
  -2  19 -10 177.673 177.582   2
   2 -19  10 60.9457 178.222   1
  -2  19 -11 225.978 178.695   2
   2 -19  11 2.38530 165.048   1
   2 -19  12 1270.55 375.058   1
   2 -19  13 1134.97 342.785   1
   2 -19  14 3687.96 583.859   1
   2 -19  15 201.459 177.343   1
   2 -19  16 1821.34 471.587   1
   2 -19  17 510.529 299.855   1
   2 -19  18 924.389 343.024   1
   2 -19  19 178.053 238.147   1
   2 -19  20 154.829 197.527   1
  -2  18   6 93.2913 162.404   5
  -2  18   5 247.450 242.872   5
  -2  18   4 84.0481 118.985   2
  -2  18   4 134.733 176.159   5
  -2  18   3 1555.03 424.851   5
  -2  18   3 1150.52 304.161   2
  -2  18   2 469.901 274.786   5
  -2  18   2 185.324 158.166   2
  -2  18   1 1434.63 392.306   5
  -2  18   1 1059.91 272.463   2
  -2  18   0-126.803 153.028   2
  -2  18   0 501.095 237.302   5
  -2  18  -1 98.8572 182.555   5
  -2  18  -1-133.282 150.606   2
  -2  18  -2-68.6904 130.190   2
  -2  18  -2 49.7318 145.419   5
  -2  18  -3 72.2530 107.103   2
  -2  18  -3 337.052 246.094   5
   2 -18   4-108.654 159.369   1
   2 -18   4 196.790 129.570   3
  -2  18  -4 290.811 151.318   2
   2 -18   5 104.213 117.469   2
   2 -18   5 100.636 159.696   1
  -2  18  -5 570.729 192.012   2
   2 -18   5 253.335 142.474   3
   2 -18   6-204.285 234.743   1
   2 -18   6-165.523 167.698   2
  -2  18  -6-289.402 159.820   2
  -2  18  -7 6012.29 533.670   2
   2 -18   7 6439.80 666.171   2
   2 -18   7 8077.34 799.091   1
   2 -18   8 1889.89 354.918   2
  -2  18  -8 1866.68 307.239   2
   2 -18   8 2050.62 431.121   1
   2 -18   9 1289.04 350.869   1
  -2  18  -9 1192.64 249.098   2
   2 -18   9 1330.96 312.083   2
  -2  18 -10 114.920 126.360   2
   2 -18  10 50.2925 179.236   1
   2 -18  10-20.0723 98.1453   2
  -2  18 -11 1430.33 305.768   2
   2 -18  11 982.858 300.270   1
   2 -18  11 650.788 212.411   2
   2 -18  12 87.3332 154.649   1
   2 -18  13 124.176 171.848   1
   2 -18  14 4.92212 163.705   1
   2 -18  15 294.200 239.769   1
   2 -18  16-57.4888 211.097   1
   2 -18  17 376.694 243.986   1
   2 -18  18 938.930 317.873   1
   2 -18  19 1294.45 383.877   1
   2 -18  20 261.291 245.263   1
   2 -18  21 570.405 307.228   1
  -2  17   7 412.386 243.999   5
  -2  17   6 47.1803 154.415   5
  -2  17   6-113.526 164.719   2
  -2  17   5 384.263 240.604   5
   2 -17  -5 126.538 107.945   4
  -2  17   5 314.691 163.257   2
  -2  17   4 223.913 212.252   5
  -2  17   4 42.4027 100.653   2
  -2  17   3 258.503 238.243   5
  -2  17   3 260.227 164.899   2
  -2  17   2 600.838 268.707   5
  -2  17   2 253.572 142.144   2
  -2  17   1 1018.10 256.958   2
  -2  17   1 987.349 325.827   5
  -2  17   0 173.984 204.869   5
  -2  17   0 109.058 104.453   2
  -2  17  -1 741.343 284.936   5
  -2  17  -1 613.386 181.997   2
  -2  17  -2 31.4755 129.437   2
  -2  17  -2 202.951 180.146   5
  -2  17  -3 2201.54 323.410   2
  -2  17  -3 2735.21 462.024   5
   2 -17   4 645.390 267.971   1
   2 -17   4 381.478 156.740   3
  -2  17  -4 568.584 186.515   2
  -2  17  -5 245.096 140.642   2
   2 -17   5 248.268 112.423   2
   2 -17   5-15.8812 146.635   1
   2 -17   5 125.689 95.6958   3
   2 -17   6 354.643 152.369   2
   2 -17   6 218.336 180.593   1
  -2  17  -6 399.469 130.313   2
   2 -17   6 454.195 176.090   3
   2 -17   7 2037.61 372.743   2
  -2  17  -7 2171.10 310.405   2
   2 -17   7 2605.59 450.930   1
   2 -17   8 826.790 291.686   1
  -2  17  -8 849.253 204.290   2
   2 -17   8 804.384 253.047   2
   2 -17   9 3364.25 523.508   1
  -2  17  -9 2786.11 372.944   2
   2 -17   9 2166.80 362.480   2
  -2  17 -10 2671.56 374.479   2
   2 -17  10 3321.63 514.020   1
   2 -17  10 1942.51 356.427   2
   2 -17  11 2111.35 425.932   1
   2 -17  11 1586.88 338.249   2
   2 -17  12 310.572 197.336   1
   2 -17  12 166.865 155.015   2
   2 -17  13 6692.97 734.754   1
   2 -17  14-350.914 244.365   1
   2 -17  15 87.2978 150.441   1
   2 -17  16 253.309 256.719   1
   2 -17  17 1250.35 358.095   1
   2 -17  18 158.857 193.573   1
   2 -17  19 241.687 229.034   1
   2 -17  20-65.1634 183.445   1
   2 -17  21 1343.86 404.493   1
  -2  16   9-25.2052 198.421   5
  -2  16   8-47.0657 219.216   5
  -2  16   8 594.300 279.402   2
  -2  16   7 636.203 238.683   2
  -2  16   7 599.817 298.042   5
   2 -16  -6 117.581 115.887   4
  -2  16   6-7.82569 184.139   5
  -2  16   6 52.6611 121.438   2
  -2  16   5 335.788 255.813   5
  -2  16   5 33.0958 127.826   2
  -2  16   4 48.8629 108.077   2
  -2  16   4 559.154 274.845   5
  -2  16   3 3766.29 469.298   2
  -2  16   3 3798.92 596.140   5
  -2  16   2 330.402 159.298   2
  -2  16   2 373.264 235.601   5
  -2  16   1 704.721 324.777   5
  -2  16   1 338.155 154.253   2
  -2  16   0 1795.02 372.575   5
  -2  16   0 2350.25 352.801   2
  -2  16  -1 775.325 264.995   5
  -2  16  -1 484.776 129.655   2
  -2  16  -2 4058.67 428.405   2
  -2  16  -2 4226.36 553.018   5
  -2  16  -3 1659.74 363.217   5
  -2  16  -3 1609.83 269.494   2
   2 -16   3 1420.57 279.594   3
   2 -16   4 8215.12 688.482   2
  -2  16  -4 8327.93 591.287   2
   2 -16   4 8221.32 668.193   3
   2 -16   4 7121.89 837.534   1
  -2  16  -5 22.6853 83.5734   2
   2 -16   5 0.16459 86.5088   3
   2 -16   5-108.969 185.937   1
   2 -16   5-79.1933 147.052   2
   2 -16   6 346.700 162.108   3
   2 -16   6 370.573 177.979   1
  -2  16  -6 297.366 116.654   2
   2 -16   6 281.938 136.822   2
   2 -16   7 9854.23 736.387   3
  -2  16  -7 9940.99 634.666   2
   2 -16   7 10753.5 772.149   2
  -2  16  -8 2987.43 371.177   2
   2 -16   8 3534.42 516.283   1
   2 -16   8 2612.26 386.882   2
  -2  16  -9 165.586 137.837   2
   2 -16   9 166.000 133.911   1
   2 -16   9-109.012 129.104   2
  -2  16 -10 14.7841 141.323   2
   2 -16  10 156.786 115.361   2
   2 -16  10 354.688 227.387   1
   2 -16  11 3808.58 526.516   1
   2 -16  11 4142.01 509.624   2
   2 -16  12 705.377 236.487   2
   2 -16  12 490.686 216.865   1
   2 -16  13 905.757 278.974   1
   2 -16  14 4826.10 617.912   1
   2 -16  15 3899.44 623.138   1
   2 -16  16 1268.47 391.143   1
   2 -16  17 536.826 280.939   1
   2 -16  18 147.481 227.013   1
   2 -16  19 124.243 164.175   1
   2 -16  20 784.992 350.023   1
   2 -16  21 325.005 222.641   1
   2 -16  22 389.356 317.440   1
  -2  15  10-138.295 189.089   5
  -2  15  10 38.8111 130.808   2
  -2  15   9 201.316 207.444   2
  -2  15   9-83.1819 238.485   5
  -2  15   8-38.6022 136.277   2
  -2  15   8 9.54815 233.056   5
  -2  15   7 373.976 235.124   2
  -2  15   7 145.059 227.237   5
   2 -15  -7 73.8479 98.6189   4
  -2  15   6-128.660 212.651   5
  -2  15   6-136.235 153.988   2
   2 -15  -6 6.19258 99.6446   4
  -2  15   5 75.2174 196.280   5
  -2  15   5-61.0113 139.954   2
  -2  15   4 339.300 210.871   5
  -2  15   4 452.471 182.726   2
  -2  15   3-233.349 194.106   5
  -2  15   3-22.4002 131.911   2
  -2  15   2 1077.65 343.812   5
  -2  15   2 491.646 153.515   2
  -2  15   1 1243.58 354.079   5
  -2  15   1 1310.94 259.646   2
  -2  15   0 301.220 153.438   2
  -2  15   0 868.865 309.741   5
  -2  15  -1 54.1447 129.858   2
  -2  15  -1 157.275 129.766   5
  -2  15  -2 1552.52 248.983   2
  -2  15  -2 1443.04 329.493   5
  -2  15  -3 1120.33 209.242   2
  -2  15  -3 1437.89 323.474   5
   2 -15   3 1165.72 247.674   3
  -2  15  -4 2237.77 296.872   2
   2 -15   4 1616.31 380.974   1
   2 -15   4 1833.25 313.244   3
   2 -15   4 2141.80 336.073   2
   2 -15   5 3350.21 491.908   1
   2 -15   5 2610.26 369.722   2
  -2  15  -5 3148.93 349.976   2
   2 -15   5 2601.55 361.197   3
   2 -15   6 628.253 195.437   3
   2 -15   6 367.600 176.354   1
   2 -15   6 665.077 203.246   2
  -2  15  -6 513.535 144.085   2
   2 -15   7 11967.9 900.450   1
  -2  15  -7 12431.5 685.711   2
   2 -15   7 11355.0 757.186   2
   2 -15   8 151.760 181.100   1
  -2  15  -8 386.358 151.397   2
   2 -15   8 225.713 112.378   2
   2 -15   9 10.0522 135.965   1
   2 -15   9-46.8524 95.6273   2
  -2  15  -9 198.213 156.780   2
   2 -15  10 10568.7 852.563   1
   2 -15  10 11201.9 793.176   2
   2 -15  11 2496.77 382.967   2
   2 -15  11 1951.42 378.336   1
   2 -15  12 3133.59 431.274   2
   2 -15  12 3984.31 531.943   1
   2 -15  13 1191.78 338.774   1
   2 -15  13 889.885 243.052   2
   2 -15  14 2195.04 429.290   1
   2 -15  15 353.761 240.091   1
   2 -15  16 5445.70 710.937   1
   2 -15  17 329.578 254.441   1
   2 -15  18 2629.78 512.333   1
   2 -15  19-38.2266 152.223   1
   2 -15  20 661.442 314.212   1
   2 -15  21 98.2992 188.643   1
   2 -15  22 202.670 265.737   1
  -2  14  12 1143.55 396.958   2
  -2  14  11-407.417 331.146   5
  -2  14  11 232.182 194.144   2
  -2  14  10 1948.07 443.322   2
  -2  14  10 1998.22 494.511   5
  -2  14   9 620.447 193.414   3
  -2  14   9 327.627 181.294   5
  -2  14   9 554.057 266.999   2
  -2  14   8 1851.73 337.322   3
  -2  14   8 1662.78 378.382   2
  -2  14   8 1514.46 415.028   5
   2 -14  -8 1551.15 291.961   4
  -2  14   7 16.9953 127.077   2
  -2  14   7 204.446 138.814   3
  -2  14   7-216.629 261.849   5
   2 -14  -7-43.7297 121.370   4
  -2  14   6 5836.40 748.682   5
   2 -14  -6 4619.81 508.125   4
  -2  14   6 4710.52 579.074   2
  -2  14   5 209.195 142.079   2
  -2  14   5-307.833 255.688   5
  -2  14   4 194.650 161.474   5
  -2  14   4 215.470 100.907   2
  -2  14   3 1372.60 359.809   5
  -2  14   3 841.105 203.714   2
  -2  14   2 289.130 189.347   5
  -2  14   2 384.456 159.617   2
  -2  14   1 586.506 179.913   2
  -2  14   1 843.192 287.862   5
  -2  14   0 2499.56 316.250   2
  -2  14   0 2670.01 449.842   5
  -2  14  -1 303.660 142.991   5
  -2  14  -1 76.9889 81.9417   2
  -2  14  -2 7809.53 534.349   2
   2 -14   2 7953.47 604.564   3
  -2  14  -2 9127.90 730.349   5
   2 -14   3 172.453 76.0736   2
   2 -14   3 156.532 113.219   3
  -2  14  -3 229.932 98.4998   2
  -2  14  -3 312.276 179.523   5
  -2  14  -4-7.16008 85.2563   2
   2 -14   4-212.345 241.181   1
   2 -14   4 5.38292 76.0344   2
  -2  14  -4 329.899 190.393   5
   2 -14   4 2.32947 90.5518   3
   2 -14   5 4794.08 560.970   1
   2 -14   5 4432.88 466.571   3
   2 -14   5 3574.61 412.405   2
  -2  14  -5 4272.68 377.233   2
   2 -14   6 1569.22 301.195   1
  -2  14  -6 1494.26 222.180   2
   2 -14   6 1451.14 287.462   3
   2 -14   6 1315.17 247.623   2
   2 -14   7 4715.97 551.891   1
  -2  14  -7 4134.63 384.353   2
   2 -14   7 4303.47 438.080   2
   2 -14   8-118.198 156.793   1
  -2  14  -8 137.881 123.645   2
   2 -14   8 54.5637 97.6904   2
   2 -14   9 25443.1 1123.56   2
  -2  14  -9 26915.7 1047.74   2
   2 -14  10 613.754 254.657   1
   2 -14  10 521.336 178.648   2
   2 -14  11 187.709 90.8737   2
   2 -14  11 516.370 214.117   1
   2 -14  12 196.911 131.403   1
   2 -14  12 120.080 89.5232   2
   2 -14  13 207.243 133.734   2
   2 -14  13 231.234 125.464   1
   2 -14  14 61.8794 143.443   1
   2 -14  15 105.771 206.587   1
   2 -14  16 314.140 230.353   1
   2 -14  17 1389.32 353.361   1
   2 -14  18 117.107 170.663   1
   2 -14  19 84.9362 133.274   1
   2 -14  20 668.084 276.027   1
   2 -14  21 182.304 211.736   1
   2 -14  22 60.7057 194.382   1
  -2  13  13-365.093 266.144   2
  -2  13  12-94.3995 253.053   5
  -2  13  12 9.10128 156.634   2
  -2  13  11 137.303 193.356   2
  -2  13  11 253.630 176.780   3
  -2  13  10-156.475 156.918   2
  -2  13  10-68.7644 129.681   3
   2 -13  -9 298.233 149.580   4
  -2  13   9 12.0265 274.461   5
  -2  13   9 412.343 228.588   2
  -2  13   9 626.460 218.958   3
  -2  13   8 111.232 128.905   3
  -2  13   8 118.940 140.033   2
   2 -13  -8-220.681 152.318   4
  -2  13   7 959.076 234.579   3
  -2  13   7 592.011 242.895   5
  -2  13   7 808.157 266.047   2
   2 -13  -7 669.841 187.280   4
  -2  13   6 3739.10 509.408   2
  -2  13   6 3622.27 590.212   5
   2 -13  -6 3612.12 439.587   4
  -2  13   6 3854.34 442.623   3
  -2  13   5 226.997 171.587   2
  -2  13   5-165.008 269.124   5
  -2  13   5 155.096 118.601   3
  -2  13   4-102.214 188.318   5
  -2  13   4 283.814 148.515   2
  -2  13   3 10267.3 708.362   2
  -2  13   3 10127.5 871.852   5
  -2  13   2-44.2808 107.253   2
  -2  13   2 69.6898 138.318   5
  -2  13   1 5205.41 590.176   5
  -2  13   1 4534.10 427.218   2
  -2  13   0 5189.84 588.996   5
  -2  13   0 4498.79 410.566   2
  -2  13  -1 1520.23 307.501   5
  -2  13  -1 1411.50 229.276   2
  -2  13  -2 5748.14 433.310   2
   2 -13   2 5416.35 657.890   5
   2 -13   2 5971.37 505.680   3
  -2  13  -2 6008.24 581.759   5
   2 -13   3 445.519 117.093   2
   2 -13   3 158.714 132.732   5
   2 -13   3 557.329 149.910   3
  -2  13  -3 632.624 204.129   5
  -2  13  -3 516.002 137.961   2
   2 -13   4 8332.28 613.418   3
  -2  13  -4 8395.27 671.377   5
  -2  13  -4 8001.46 503.381   2
   2 -13   4 8635.57 751.674   5
   2 -13   4 7784.91 578.946   2
   2 -13   5 1162.46 218.073   2
   2 -13   5 1055.51 261.922   5
   2 -13   5 1457.27 268.428   3
  -2  13  -5 864.351 155.028   2
   2 -13   5 1235.77 291.314   1
   2 -13   6 3629.68 513.858   1
  -2  13  -6 3023.74 301.741   2
   2 -13   6 2925.79 410.795   5
   2 -13   6 2871.21 331.783   2
  -2  13  -7 23475.6 886.386   2
   2 -13   7 24844.3 1192.71   5
   2 -13   7 22345.1 965.207   2
   2 -13   7 25313.9 1236.49   1
   2 -13   8 586.392 201.232   1
   2 -13   8 617.740 236.017   5
  -2  13  -8 464.527 159.807   2
   2 -13   8 713.584 189.493   2
   2 -13   9 7527.30 665.981   1
   2 -13   9 7201.59 578.124   2
   2 -13  10 1083.76 259.174   1
   2 -13  10 806.430 191.946   2
   2 -13  11 3396.62 454.015   1
   2 -13  11 4193.43 454.372   2
   2 -13  12 301.757 132.962   2
   2 -13  12 351.968 186.077   1
   2 -13  13 226.503 137.854   2
   2 -13  13 118.323 153.152   1
   2 -13  14 2171.93 409.353   1
   2 -13  15 129.700 164.260   1
   2 -13  16 111.175 158.468   1
   2 -13  17 287.261 239.624   1
   2 -13  18 938.750 341.299   1
   2 -13  19 1687.26 426.586   1
   2 -13  20 8.76951 168.804   1
   2 -13  21 3270.31 623.945   1
   2 -13  22 199.093 245.416   1
  -2  12  15 0.79567 194.828   2
  -2  12  14 48.6088 171.668   2
  -2  12  13 484.390 327.654   5
  -2  12  13-2.79359 202.634   2
  -2  12  13 121.202 128.500   3
  -2  12  12 964.198 332.842   2
  -2  12  12 1996.40 539.675   5
  -2  12  12 1163.37 312.156   3
  -2  12  11 625.398 260.919   2
  -2  12  11 606.501 226.570   3
  -2  12  11 1118.03 429.753   5
   2 -12 -10 1058.31 238.608   4
  -2  12  10 849.765 236.361   3
  -2  12  10 1232.30 417.440   5
  -2  12  10 947.967 313.485   2
   2 -12  -9 1274.55 256.091   4
  -2  12   9 1383.70 345.469   2
  -2  12   9 1233.04 270.505   3
  -2  12   9 1355.63 400.884   5
  -2  12   8-14.3441 158.348   2
  -2  12   8-300.253 274.560   5
  -2  12   8 212.297 127.596   3
   2 -12  -8-188.432 169.349   4
  -2  12   7-105.648 241.156   5
  -2  12   7 564.778 224.264   2
   2 -12  -7 414.510 156.965   4
  -2  12   7 342.855 157.048   3
  -2  12   6 2030.87 382.690   5
  -2  12   6 2522.67 351.992   3
   2 -12  -6 2334.90 348.377   4
  -2  12   6 2167.66 367.621   2
  -2  12   5 4326.32 498.038   2
  -2  12   5 5295.49 627.928   5
  -2  12   5 5313.41 500.609   3
  -2  12   4 7499.97 616.884   2
  -2  12   4 7754.69 598.046   3
  -2  12   4 7719.66 759.162   5
  -2  12   3 9135.76 638.268   2
  -2  12   3 9980.15 836.803   5
  -2  12   2 1367.99 308.654   5
  -2  12   2 1425.49 229.257   2
  -2  12   1 8372.25 714.033   5
  -2  12   1 8764.87 558.475   2
   2 -12   0 6041.23 684.228   5
  -2  12   0 5761.11 423.383   2
  -2  12   0 6463.95 619.567   5
  -2  12  -1 10973.3 774.332   5
  -2  12  -1 9582.62 540.418   2
   2 -12   1 9642.28 844.247   5
  -2  12  -2 16591.1 918.955   5
   2 -12   2 16803.6 1074.42   5
  -2  12  -2 16208.9 677.832   2
   2 -12   3 60.0780 89.6860   5
   2 -12   3 201.436 100.761   3
  -2  12  -3 178.357 90.3165   2
   2 -12   3 208.501 98.6264   2
  -2  12  -3 477.777 203.087   5
   2 -12   4 628.572 191.195   1
  -2  12  -4 855.701 165.214   2
   2 -12   4 772.593 193.708   3
   2 -12   4 809.247 227.222   5
   2 -12   4 647.147 166.379   2
  -2  12  -5 63.9782 60.1113   2
   2 -12   5 225.362 118.607   5
   2 -12   5 139.588 120.734   1
   2 -12   5 97.4448 59.2315   2
   2 -12   6 12558.4 790.695   1
  -2  12  -6 10468.0 544.839   2
   2 -12   6 11374.1 786.223   5
   2 -12   6 10039.9 599.058   2
   2 -12   7 8758.48 701.149   5
  -2  12  -7 8574.01 513.893   2
   2 -12   7 9952.26 723.648   1
   2 -12   7 9055.90 580.024   2
   2 -12   8 3086.62 352.944   2
   2 -12   8 2859.63 394.880   1
   2 -12   8 3213.20 411.522   5
   2 -12   9 2648.34 332.592   2
   2 -12   9 2534.31 366.990   5
   2 -12   9 2299.51 369.334   1
   2 -12  10 14.0616 115.253   1
   2 -12  10 61.2461 68.4031   2
   2 -12  10 57.6931 103.371   5
   2 -12  11-82.6423 170.022   1
   2 -12  11 225.490 126.489   2
   2 -12  12 536.290 202.029   1
   2 -12  12 964.853 233.062   2
   2 -12  13 11516.2 887.429   1
   2 -12  13 12876.6 801.811   2
   2 -12  14 8909.48 680.181   2
   2 -12  14 8162.86 768.750   1
   2 -12  15 319.172 210.132   1
   2 -12  16 484.289 253.776   1
   2 -12  17 2098.69 447.251   1
   2 -12  18 257.204 206.202   1
   2 -12  19 944.182 338.804   1
   2 -12  20 136.667 215.747   1
   2 -12  21-43.0613 192.409   1
   2 -12  22 350.865 253.215   1
   2 -12  23-522.909 313.850   1
  -2  11  14-40.1605 147.578   3
  -2  11  14 506.510 375.562   5
  -2  11  13-30.3547 128.980   3
  -2  11  13 485.221 330.975   5
  -2  11  12-23.3547 204.079   2
  -2  11  12 18.8094 145.204   3
  -2  11  12 205.391 235.652   5
  -2  11  11 169.307 146.942   2
  -2  11  11 718.757 232.215   3
   2 -11 -11 757.354 197.778   4
  -2  11  11 1085.29 411.006   5
  -2  11  10 610.651 211.281   3
  -2  11  10 485.139 208.117   2
  -2  11  10 1261.17 436.998   5
   2 -11 -10 850.606 212.492   4
  -2  11   9 88.3338 118.446   3
  -2  11   9-34.1610 155.318   2
  -2  11   9 420.674 300.975   5
   2 -11  -9-125.874 142.628   4
   2 -11  -8 369.054 121.186   4
  -2  11   8 481.041 219.301   2
  -2  11   8 444.862 150.056   3
  -2  11   7 2319.56 351.601   3
  -2  11   7 1775.44 363.196   2
  -2  11   7 1907.78 390.676   5
   2 -11  -7 2063.51 327.519   4
  -2  11   6 5732.90 525.367   3
  -2  11   6 5786.59 581.485   2
  -2  11   6 4669.14 617.722   5
   2 -11  -6 4757.37 478.968   4
  -2  11   5 1715.76 291.719   2
  -2  11   5 2030.72 305.506   3
  -2  11   5 1707.59 340.649   5
  -2  11   4 870.839 213.459   2
  -2  11   4 182.391 166.331   5
  -2  11   4 627.742 188.170   3
  -2  11   3 4001.02 413.635   3
  -2  11   3 4481.24 432.413   2
  -2  11   3 3595.18 492.266   5
   2 -11  -2-301.851 254.043   5
  -2  11   2-76.8742 125.425   5
  -2  11   2-128.269 145.374   2
   2 -11  -1 4167.23 603.799   5
  -2  11   1 5168.59 549.471   5
  -2  11   1 4509.52 371.197   2
   2 -11   0 650.448 243.901   5
  -2  11   0 471.125 113.339   2
  -2  11   0 548.182 212.288   5
  -2  11  -1 2671.06 272.868   2
  -2  11  -1 3775.39 450.517   5
   2 -11   1 3505.03 486.149   5
   2 -11   2 939.059 222.991   5
  -2  11  -2 1320.12 186.875   2
  -2  11  -2 1444.39 282.731   5
   2 -11   2 1484.81 225.785   2
   2 -11   3 4263.86 369.195   2
  -2  11  -3 4537.61 331.159   2
  -2  11  -3 4759.28 474.384   5
   2 -11   3 4792.47 519.832   5
  -2  11  -4 18533.0 650.039   2
   2 -11   4 19361.3 1024.96   5
   2 -11   5 2400.84 333.734   1
   2 -11   5 2319.53 272.138   2
  -2  11  -5 2637.35 258.283   2
   2 -11   5 2666.56 375.069   5
   2 -11   6 905.344 227.932   5
  -2  11  -6 867.516 168.258   2
   2 -11   6 769.310 169.783   2
   2 -11   6 792.526 215.383   1
   2 -11   7 22319.6 1028.86   5
   2 -11   7 20754.6 839.534   2
  -2  11  -7 20863.0 788.645   2
   2 -11   8 11511.0 641.284   2
   2 -11   8 12242.5 780.103   5
   2 -11   9 21342.1 877.688   2
   2 -11   9 19267.7 972.504   5
   2 -11  10 10946.2 665.929   2
   2 -11  10 8992.86 696.620   1
  -2  11 -10 10761.5 796.605   1
   2 -11  11 15775.5 926.499   1
   2 -11  11 14897.7 782.880   2
  -2  11 -11 15227.0 991.800   1
   2 -11  12 1363.65 255.207   2
   2 -11  12 1419.59 316.597   1
   2 -11  13 12948.7 770.296   2
   2 -11  13 8756.39 765.660   1
   2 -11  14 9044.04 672.569   2
   2 -11  14 10134.0 830.356   1
   2 -11  15 301.590 231.481   1
   2 -11  16 3248.77 506.546   1
   2 -11  17 511.605 270.220   1
   2 -11  18-55.5348 172.674   1
   2 -11  19 168.025 197.634   1
   2 -11  20 2593.24 543.603   1
   2 -11  21 27.2046 181.969   1
   2 -11  22-168.112 258.709   1
   2 -11  23 216.724 271.404   1
  -2  10  15 640.188 376.868   5
  -2  10  14 1036.66 452.461   5
  -2  10  13 950.383 446.274   5
  -2  10  12 4657.94 781.960   5
   2 -10 -11 1522.93 261.119   4
  -2  10  11 1398.91 305.779   3
  -2  10  11 1439.44 427.055   5
  -2  10  10 6085.41 606.747   3
  -2  10  10 5876.24 815.092   5
   2 -10 -10 5885.22 517.663   4
  -2  10   9 2783.86 527.989   5
  -2  10   9 2274.40 348.526   3
  -2  10   8 8796.23 771.146   2
  -2  10   8 9003.43 928.514   5
  -2  10   8 8892.97 666.469   3
  -2  10   7 1030.87 258.181   2
  -2  10   7 870.207 214.865   3
  -2  10   7 1327.13 380.581   5
  -2  10   6 104.430 188.423   5
  -2  10   6 31.6838 127.376   2
  -2  10   6 42.5997 113.056   3
  -2  10   5 915.781 182.435   5
  -2  10   5 864.448 213.573   2
  -2  10   5 985.353 208.268   3
  -2  10   4 2808.13 342.000   3
  -2  10   4 2392.94 387.480   5
   2 -10  -4 2390.57 490.238   5
  -2  10   4 2234.31 320.328   2
  -2  10   3 806.640 195.976   2
  -2  10   3 750.489 180.676   3
  -2  10   3 530.236 144.224   5
   2 -10  -3 612.722 196.331   5
  -2  10   2 83.8690 111.899   3
  -2  10   2 49.1863 118.950   5
   2 -10  -2-90.2545 130.924   5
  -2  10   2-17.6225 75.8056   2
  -2  10   1 1588.75 209.038   2
  -2  10   1 1689.78 310.976   5
   2 -10  -1 1458.02 308.000   5
  -2  10   0 2183.26 359.666   5
  -2  10   0 2318.03 248.378   2
   2 -10   0 2460.28 402.925   5
  -2  10  -1 348.514 189.053   5
  -2  10  -1 203.697 55.0287   2
  -2  10  -2 13404.3 768.771   5
  -2  10  -2 13708.8 527.073   2
   2 -10   2 12663.3 595.844   2
  -2  10  -3 245.959 92.1917   2
   2 -10   3 136.597 76.8141   2
  -2  10  -3 325.173 159.620   5
   2 -10   4 4934.55 363.559   2
  -2  10  -4 4338.53 300.939   2
   2 -10   4 5638.48 533.229   1
  -2  10  -5 5263.05 338.556   2
   2 -10   5 5451.11 384.288   2
   2 -10   5 6093.70 514.729   1
   2 -10   6 275.279 173.392   1
  -2  10  -6 261.349 116.477   2
   2 -10   6 66.9280 53.3709   2
   2 -10   7 6214.06 433.546   2
   2 -10   7 6574.27 546.175   1
   2 -10   8 4467.51 460.123   1
   2 -10   8 4477.81 385.583   2
   2 -10   9 1413.76 270.336   1
   2 -10   9 1435.14 227.999   2
  -2  10  -9 1910.85 331.281   1
  -2  10 -10 849.286 234.582   1
   2 -10  10 702.268 177.474   1
   2 -10  10 843.680 180.073   2
   2 -10  11-46.8166 137.351   1
   2 -10  11 55.0595 82.5613   2
  -2  10 -11 168.230 90.2233   1
   2 -10  12 485.620 213.583   1
   2 -10  12 238.285 102.615   2
  -2  10 -12 124.550 119.244   1
   2 -10  13 206.366 125.770   2
   2 -10  13 345.628 181.818   1
   2 -10  14 29.6213 134.015   1
   2 -10  14 6.81420 93.4335   2
   2 -10  15 2533.11 395.562   1
   2 -10  16 683.302 249.064   1
   2 -10  17 332.169 180.045   1
   2 -10  18 3361.51 575.194   1
   2 -10  19 0.31045 158.232   1
   2 -10  20 300.953 205.618   1
   2 -10  21-162.778 228.550   1
   2 -10  22 163.944 253.995   1
   2 -10  23 660.411 372.302   1
  -2   9  16-109.922 215.938   5
  -2   9  15 102.437 293.136   5
  -2   9  14-79.7403 233.664   5
  -2   9  13 177.709 369.328   5
  -2   9  12 1058.96 372.647   5
  -2   9  11 210.935 290.953   5
  -2   9  10 132.318 237.479   5
  -2   9   9 4272.70 666.615   5
  -2   9   8 2294.83 332.865   3
  -2   9   8 2188.55 508.177   5
  -2   9   7 593.733 193.661   3
  -2   9   7 950.103 358.479   5
  -2   9   6 2208.04 327.874   2
  -2   9   6 2042.52 293.188   3
  -2   9   6 2512.36 462.429   5
  -2   9   5 8744.01 605.626   3
  -2   9   5 8483.23 623.744   2
   2  -9  -5 9289.21 940.925   5
  -2   9   5 8888.90 780.155   5
  -2   9   4 812.724 197.190   5
   2  -9  -4 1099.52 325.887   5
  -2   9   4 1155.00 212.483   2
  -2   9   4 1336.71 232.314   3
  -2   9   3 6366.11 465.343   2
   2  -9  -3 5978.79 677.468   5
  -2   9   3 6295.42 580.916   5
  -2   9   3 5740.13 471.176   3
  -2   9   2 14419.2 708.413   3
  -2   9   2 13237.1 840.020   5
  -2   9   1 178.258 135.446   5
  -2   9   1 213.052 63.3413   2
   2  -9   0 36276.4 1114.37   3
  -2   9   0 38072.2 1295.91   5
  -2   9   0 36281.0 863.239   2
   2  -9   1 35215.2 1113.64   3
  -2   9  -1 33245.4 1182.70   5
  -2   9  -1 33388.0 765.994   2
  -2   9  -2 4853.53 283.777   2
   2  -9   2 4511.43 395.280   3
  -2   9  -2 4302.20 411.534   5
   2  -9   2 4350.49 317.484   2
  -2   9  -3 33613.3 740.187   2
  -2   9  -3 34975.1 1145.33   5
   2  -9   3 32197.3 838.205   2
   2  -9   4 9870.27 468.020   2
  -2   9  -4 9245.78 402.558   2
   2  -9   4 9524.48 648.308   1
   2  -9   5 602.120 177.478   1
  -2   9  -5 692.301 131.585   2
   2  -9   5 411.891 101.105   2
   2  -9   6 22017.4 745.515   2
   2  -9   6 20004.1 945.149   1
   2  -9   7 154.941 106.556   1
   2  -9   7 275.557 104.672   2
   2  -9   8 358.457 141.258   1
   2  -9   8 696.705 159.931   2
   2  -9   9 14479.7 679.167   2
   2  -9   9 14700.3 801.396   1
   2  -9  10 4202.63 377.579   2
   2  -9  10 4802.68 491.986   1
   2  -9  11 137.629 70.2753   2
   2  -9  11 353.724 181.710   1
  -2   9 -11 358.605 165.690   1
   2  -9  12 424.664 189.417   1
  -2   9 -12 295.298 173.304   1
   2  -9  12 156.801 107.221   2
   2  -9  13 18.9996 134.400   1
   2  -9  13 262.941 136.655   2
   2  -9  14 1636.61 403.405   1
   2  -9  14 2990.51 378.529   2
   2  -9  15 808.632 258.844   1
   2  -9  16 9325.54 851.705   1
   2  -9  17 5578.32 718.844   1
   2  -9  18 276.173 195.741   1
   2  -9  19 2456.57 490.111   1
   2  -9  20 649.156 367.329   1
   2  -9  21-0.66442 160.239   1
   2  -9  22 144.414 265.277   1
   2  -9  23 1698.73 521.276   1
  -2   8  17-51.3149 239.227   5
  -2   8  16-340.475 341.458   5
  -2   8  15-124.910 281.282   5
  -2   8  14 2029.35 566.383   5
  -2   8  13 1189.85 421.123   5
  -2   8  12 6713.03 887.533   5
  -2   8  11 992.735 377.814   5
  -2   8  10 2487.52 501.896   5
  -2   8   9-83.7310 179.836   5
  -2   8   8 8655.07 861.697   5
  -2   8   7 16663.5 1161.70   5
  -2   8   7 16578.7 854.575   3
  -2   8   6 7681.32 568.252   3
  -2   8   6 8827.65 786.014   5
   2  -8  -6 8732.50 922.464   5
  -2   8   5 23415.0 953.195   3
   2  -8  -5 24785.6 1478.94   5
  -2   8   5 23081.2 1218.26   5
  -2   8   4 6548.78 493.660   3
  -2   8   4 6285.31 605.626   5
  -2   8   4 7352.24 506.289   2
  -2   8   3 25588.6 953.961   3
  -2   8   3 25350.7 1148.69   5
  -2   8   3 28171.5 917.640   2
  -2   8   2 3587.48 341.947   3
  -2   8   2 3275.89 278.791   2
  -2   8   2 2982.71 393.840   5
  -2   8   1 8625.14 404.810   2
  -2   8   1 8946.54 548.352   3
  -2   8   1 8437.20 611.365   5
  -2   8   0 7993.05 574.954   5
   2  -8   0 7186.42 476.855   3
  -2   8   0 7842.74 359.163   2
  -2   8  -1 1740.92 151.602   2
   2  -8   1 1605.98 235.636   3
  -2   8  -1 1665.82 273.625   5
   2  -8   1 1754.38 179.228   2
   2  -8   2 24780.3 885.673   3
   2  -8   2 27090.9 691.313   2
  -2   8  -2 23386.6 556.316   2
  -2   8  -2 23764.6 929.741   5
  -2   8  -3 4793.24 412.251   5
   2  -8   3 4856.08 440.101   1
   2  -8   3 4451.13 276.934   2
  -2   8  -3 4413.77 248.158   2
  -2   8  -4 29140.5 691.239   2
   2  -8   4 27427.3 997.089   1
   2  -8   4 29121.7 746.916   2
   2  -8   5 2517.58 317.811   1
   2  -8   5 2360.10 219.594   2
   2  -8   6 757.707 147.260   2
   2  -8   6 776.125 178.867   1
   2  -8   7 27217.5 1036.17   1
   2  -8   7 27121.2 806.581   2
   2  -8   8 28442.2 865.074   2
   2  -8   8 23223.3 971.077   1
   2  -8   9 834.219 166.772   2
   2  -8   9 937.521 212.484   1
   2  -8  10 17619.2 946.062   1
   2  -8  10 14676.1 687.804   2
   2  -8  11 3475.31 400.727   2
  -2   8 -11 4259.11 487.173   1
  -2   8 -12 6426.95 612.493   1
   2  -8  12 7648.73 644.755   1
   2  -8  12 6417.34 488.838   2
   2  -8  13 484.272 166.239   2
   2  -8  13 204.326 140.784   1
   2  -8  14 1633.09 343.320   1
   2  -8  14 1664.18 288.438   2
   2  -8  15 10005.3 870.104   1
   2  -8  16 156.273 154.279   1
   2  -8  17 336.683 285.434   1
   2  -8  18 3035.31 540.158   1
   2  -8  19 1116.89 351.430   1
   2  -8  20 19.7477 190.268   1
   2  -8  21 283.129 353.782   1
   2  -8  22 138.298 245.432   1
   2  -8  23-80.9877 237.980   1
  -2   7  17-1012.97 486.461   5
  -2   7  16-271.986 398.575   5
  -2   7  15 491.271 218.661   5
  -2   7  14-612.764 414.113   5
  -2   7  13 58.7382 260.534   5
  -2   7  12-297.869 266.171   5
  -2   7  11 123.815 231.248   5
  -2   7  10 11548.3 1060.86   5
  -2   7   9 4814.60 657.121   5
   2  -7  -8 5150.14 725.100   5
  -2   7   8 4575.72 627.034   5
   2  -7  -7-19.6407 190.461   5
  -2   7   7 159.098 200.061   5
   2  -7  -6 544.009 245.584   5
  -2   7   6 691.358 291.215   5
   2  -7  -6 358.979 135.606   4
  -2   7   5 6263.27 477.693   3
  -2   7   5 6267.54 639.630   5
  -2   7   4 430.936 125.568   3
  -2   7   4 1027.51 290.820   5
  -2   7   3 1050.08 161.986   2
  -2   7   3 941.356 195.529   5
  -2   7   3 1137.49 202.063   3
  -2   7   2 14869.2 804.664   5
  -2   7   2 14348.0 547.191   2
  -2   7   2 14616.1 682.311   3
  -2   7   1 7877.87 482.486   3
  -2   7   1 7431.64 330.389   2
  -2   7   1 7557.80 547.528   5
  -2   7   0 6852.04 493.881   5
   2  -7   0 6815.15 445.987   3
  -2   7   0 7037.12 284.833   2
   2  -7   1 17070.1 720.223   3
  -2   7  -1 16271.6 405.644   2
  -2   7  -1 15359.1 724.040   5
   2  -7   2 16918.6 477.633   2
   2  -7   2 17684.7 725.548   3
  -2   7  -2 17305.6 406.054   2
  -2   7  -2 16618.9 725.627   5
  -2   7  -3 862.020 106.689   2
   2  -7   3 637.864 105.169   2
   2  -7   3 575.236 120.043   1
   2  -7   4 54418.6 1342.23   1
   2  -7   4 79158.9 1112.95   2
   2  -7   5 37337.4 820.982   2
   2  -7   5 34470.3 1113.90   1
   2  -7   6 69735.0 1184.73   2
   2  -7   6 68385.6 1539.21   1
   2  -7   7 75732.1 1319.64   2
   2  -7   7 58456.7 1442.94   1
   2  -7   8 16047.6 790.312   1
   2  -7   8 14535.9 606.222   2
   2  -7   9 47791.4 1463.55   1
   2  -7   9 39977.5 1074.19   2
   2  -7  10 2126.76 269.371   2
   2  -7  10 1896.80 317.620   1
   2  -7  11 23263.3 916.015   2
   2  -7  11 21431.0 1094.59   1
   2  -7  12 1342.92 304.090   1
  -2   7 -12 1659.51 319.641   1
   2  -7  12 1596.32 250.789   2
  -2   7 -13 6669.77 636.558   1
   2  -7  13 6641.11 636.991   1
   2  -7  14 2708.29 426.069   1
   2  -7  15 176.373 192.854   1
   2  -7  16 6965.72 777.839   1
   2  -7  17 194.376 229.658   1
   2  -7  18 730.315 305.999   1
   2  -7  19 2028.08 481.514   1
   2  -7  20 760.716 335.887   1
   2  -7  21-298.729 261.362   1
   2  -7  22 69.0372 257.434   1
  -2   6  18-426.224 420.222   5
  -2   6  17 2375.08 578.411   5
  -2   6  16-220.237 352.126   5
  -2   6  15 4632.85 792.647   5
  -2   6  14 437.734 218.621   5
  -2   6  13 6476.05 841.597   5
  -2   6  12 977.581 285.111   5
  -2   6  11 7564.55 877.201   5
  -2   6  10 12834.0 1120.29   5
  -2   6   9 905.996 306.405   5
   2  -6  -8 5722.40 746.226   5
  -2   6   8 5399.62 653.534   5
  -2   6   7 6508.30 688.681   5
   2  -6  -7 6697.07 816.921   5
   2  -6  -7 7141.38 513.254   4
  -2   6   6 8829.49 754.278   5
   2  -6  -6 10053.0 610.773   4
  -2   6   5 5786.48 587.049   5
   2  -6  -5 5782.81 457.994   4
  -2   6   4 9442.33 713.137   5
  -2   6   4 8904.77 544.274   3
  -2   6   3 642.897 140.875   3
  -2   6   3 836.749 179.082   5
  -2   6   2 10861.5 657.988   5
  -2   6   2 12213.2 588.969   3
  -2   6   1 11500.6 641.827   5
  -2   6   1 10565.0 547.672   3
  -2   6   1 9743.80 329.225   2
   2  -6   0 31305.4 941.471   3
  -2   6   0 30280.7 489.250   2
  -2   6  -1 1255.12 201.323   5
   2  -6   1 1106.21 171.196   3
  -2   6  -1 1128.73 83.5583   2
   2  -6   1 1076.84 102.579   2
   2  -6   2 26462.5 865.920   3
   2  -6   2 23030.2 480.249   2
  -2   6  -2 24966.2 819.295   5
   2  -6   3 8734.04 317.242   2
   2  -6   3 9201.13 526.628   1
   2  -6   4 11170.1 585.278   1
   2  -6   4 11856.3 400.591   2
   2  -6   5 30309.5 949.217   1
   2  -6   5 27390.0 671.791   2
   2  -6   6 23513.7 677.657   2
   2  -6   6 25749.1 881.877   1
   2  -6   7 1065.74 155.488   2
   2  -6   7 878.548 186.041   1
   2  -6   8 35.1207 111.941   1
   2  -6   9 3214.20 380.559   1
   2  -6  10 275.364 146.295   1
   2  -6  11 1869.42 301.886   1
  -2   6 -11 1354.32 262.285   1
   2  -6  12 1325.25 282.340   1
  -2   6 -12 1018.36 231.035   1
  -2   6 -13 2380.44 400.638   1
   2  -6  13 2533.11 415.783   1
   2  -6  14 28.8045 171.415   1
   2  -6  15 513.160 260.051   1
   2  -6  16 3094.35 712.344   1
   2  -6  17 1006.15 326.726   1
   2  -6  18 937.502 367.476   1
   2  -6  19 337.054 209.060   1
   2  -6  20 4396.71 790.542   1
   2  -6  21 510.323 331.866   1
   2  -6  22 614.685 373.560   1
  -2   5  19-332.888 321.488   5
  -2   5  18-509.763 469.376   5
  -2   5  17-595.997 450.580   5
  -2   5  16-621.042 464.299   5
  -2   5  15 416.702 260.294   5
  -2   5  14 1310.74 404.746   5
  -2   5  13-369.600 383.037   5
  -2   5  12-479.409 367.815   5
  -2   5  11 2856.20 554.345   5
  -2   5  10 13389.8 1096.94   5
  -2   5   9 1.54198 235.628   5
   2  -5  -9 69.9592 116.229   5
   2  -5  -9 132.875 97.6473   1
  -2   5   8 13611.4 1015.74   5
   2  -5  -8 13976.0 718.646   4
  -2   5   7 12049.0 902.736   5
   2  -5  -7 10995.7 627.793   4
  -2   5   6 443.536 175.389   5
   2  -5  -6 431.731 112.252   4
  -2   5   5 27643.2 1216.38   5
   2  -5  -5 29443.0 1004.39   4
  -2   5   4 29313.0 1200.18   5
  -2   5   3 54686.1 1245.52   3
  -2   5   3 52193.7 1466.86   5
  -2   5   2 55642.7 1237.57   3
  -2   5   2 52706.7 1390.90   5
  -2   5   1 85842.6 1483.07   3
  -2   5   1 81685.3 759.060   2
  -2   5   1 80978.7 1607.65   5
   2  -5   0 43693.7 1062.39   3
   2  -5   0 45759.2 1223.52   5
  -2   5   0 46361.5 1096.84   3
  -2   5   0 44146.5 1095.07   5
  -2   5  -1 3826.10 310.121   5
   2  -5   1 3552.57 321.465   5
   2  -5   1 3579.87 305.080   3
   2  -5   2 10524.7 526.718   5
   2  -5   2 10230.7 278.617   2
   2  -5   2 9650.25 524.689   1
  -2   5  -2 9959.73 491.771   5
   2  -5   3 27788.5 519.606   2
   2  -5   3 26581.3 837.477   5
   2  -5   4 12814.6 560.781   5
   2  -5   4 11188.8 549.276   1
  -2   5  -4 12981.8 610.495   1
   2  -5   4 11956.6 399.822   2
  -2   5  -5 6130.81 436.306   1
   2  -5   5 6981.45 449.930   1
   2  -5   6 36017.8 1042.81   1
   2  -5   7 21481.5 867.844   1
   2  -5   8 2369.02 312.423   1
   2  -5   9 6116.45 520.502   1
   2  -5  10 6718.60 529.519   1
  -2   5 -11 19716.0 978.974   1
   2  -5  11 21668.1 1035.11   1
  -2   5 -12 16311.3 1025.58   1
   2  -5  12 21432.2 1138.69   1
  -2   5 -13 17537.0 1067.09   1
   2  -5  13 15454.3 1170.19   1
   2  -5  14 31091.7 1507.55   1
   2  -5  15 249.700 195.299   1
   2  -5  16 3305.93 572.420   1
   2  -5  17 1175.60 390.181   1
   2  -5  18 1116.93 349.377   1
   2  -5  19 2647.98 567.320   1
   2  -5  20 455.496 324.901   1
   2  -5  21 335.512 276.746   1
   2  -5  22-182.794 293.335   1
  -2   4  19-266.260 348.468   5
  -2   4  18-594.285 399.034   5
  -2   4  17-238.244 353.039   5
  -2   4  16-166.288 245.141   5
  -2   4  15 79.3653 249.802   5
  -2   4  14 3714.76 691.667   5
  -2   4  13 4092.16 697.468   5
  -2   4  12 12684.8 1147.07   5
  -2   4  11 10354.1 963.764   5
   2  -4 -10 13921.7 961.562   1
  -2   4  10 17537.0 1237.78   5
   2  -4  -9 7304.93 643.164   1
  -2   4   9 7186.37 751.580   5
  -2   4   8 11944.5 901.850   5
   2  -4  -8 12541.7 657.443   4
   2  -4  -7 14660.9 697.373   4
  -2   4   7 13370.1 939.505   5
  -2   4   6 23122.1 1165.44   5
   2  -4  -6 24711.4 899.706   4
  -2   4   5 82514.7 2018.05   5
   2  -4  -5 79768.8 1610.13   4
  -2   4   4 5955.37 516.441   5
   2  -4  -4 6197.51 441.097   4
  -2   4   3 8124.92 558.746   5
  -2   4   3 7422.33 447.073   3
   2  -4  -2 770.679 173.385   5
  -2   4   2 602.344 90.4330   5
  -2   4   2 837.642 148.571   3
   2  -4  -1 16438.3 637.437   3
  -2   4   1 16969.2 677.854   5
  -2   4   1 15702.3 615.562   3
   2  -4   0 31429.4 887.559   3
   2  -4   0 31767.2 940.544   5
  -2   4   0 34299.2 894.204   3
  -2   4   0 33857.1 886.666   5
  -2   4  -1 67028.0 1208.32   5
   2  -4   1 62062.7 1233.36   5
   2  -4   2 4809.59 333.771   1
   2  -4   2 5616.33 358.734   5
   2  -4   3 19559.1 688.972   1
   2  -4   3 18950.8 645.725   5
  -2   4  -3 19071.9 701.437   1
   2  -4   4 93.7199 88.0487   1
  -2   4  -4 39.9851 73.5714   1
   2  -4   5 2954.72 291.605   1
  -2   4  -5 3235.02 325.660   1
   2  -4   6 3302.28 331.008   1
  -2   4  -6 3670.39 326.457   1
  -2   4  -7 421.436 124.517   1
   2  -4   7 319.752 121.180   1
   2  -4   8 45583.2 1294.81   1
   2  -4   9 711.927 189.944   1
  -2   4 -10 3073.95 371.833   1
   2  -4  10 3039.30 394.621   1
  -2   4 -11 334.987 205.208   1
   2  -4  11 150.055 160.568   1
  -2   4 -12 23754.9 1161.55   1
   2  -4  12 21625.5 1156.48   1
  -2   4 -13 3492.99 472.600   1
   2  -4  13 2736.24 459.005   1
   2  -4  14 3995.01 523.824   1
   2  -4  15 120.007 184.751   1
   2  -4  16 6566.85 740.157   1
   2  -4  17 3807.39 630.739   1
   2  -4  18 40.2884 213.295   1
   2  -4  19-175.646 247.808   1
   2  -4  20-41.9952 241.220   1
   2  -4  21 4.27846 199.137   1
   2  -4  22-380.339 309.558   1
  -2   3  20 471.948 334.873   5
  -2   3  19 529.131 442.515   5
  -2   3  18 506.782 424.945   5
  -2   3  17 496.082 355.260   5
  -2   3  16 1231.90 472.895   5
  -2   3  15 658.733 380.840   5
  -2   3  14 2578.26 608.448   5
  -2   3  13 6322.74 857.697   5
  -2   3  12 4473.18 736.134   5
  -2   3  11 2297.05 513.471   5
   2  -3 -11 2146.73 378.412   1
   2  -3 -10 10306.4 791.511   1
  -2   3  10 10918.6 977.035   5
   2  -3  -9 1349.11 278.930   1
   2  -3  -9 1368.54 232.166   4
  -2   3   9 1660.48 402.262   5
  -2   3   8 10002.9 824.115   5
   2  -3  -8 9618.38 578.763   4
  -2   3   7 6878.87 639.661   5
   2  -3  -7 8786.10 537.668   4
  -2   3   6 4940.86 517.988   5
   2  -3  -6 5353.21 406.197   4
  -2   3   5 3035.49 381.128   5
   2  -3  -5 3262.14 311.650   4
   2  -3  -4 15037.3 845.877   5
  -2   3   4 14802.4 764.629   5
   2  -3  -4 15065.6 657.415   4
   2  -3  -3 16217.3 802.525   5
  -2   3   3 16567.6 752.501   5
  -2   3   2 1179.43 166.210   3
  -2   3   2 1230.25 81.8841   2
  -2   3   2 1405.83 212.083   5
   2  -3  -2 1038.25 184.186   5
  -2   3   1 57530.4 1122.51   3
   2  -3  -1 57369.3 1252.14   5
  -2   3   1 56678.5 1155.92   5
  -2   3   0 109668. 1521.96   3
   2  -3   0 115278. 1613.13   5
  -2   3   0 107780. 1457.90   5
   2  -3   1 74994.1 1225.26   5
  -2   3  -1 72470.0 1140.61   5
   2  -3   2 425552. 2829.07   1
   2  -3   2 410067. 2817.04   5
  -2   3  -3 155254. 1768.82   1
   2  -3   3 134505. 1648.09   1
   2  -3   4 91145.6 1433.14   1
  -2   3  -4 72635.8 1381.51   1
   2  -3   5 6623.75 436.196   1
  -2   3  -5 5378.64 385.197   1
  -2   3  -6 113351. 1822.50   1
   2  -3   6 97754.8 1711.52   1
  -2   3  -7 20915.9 840.286   1
   2  -3   7 23764.3 878.921   1
   2  -3   8 1186.23 318.602   1
   2  -3   9 50657.5 1489.57   1
  -2   3 -10 6015.70 563.136   1
   2  -3  10 4737.39 565.138   1
   2  -3  11 8175.30 700.949   1
  -2   3 -11 7450.38 669.112   1
  -2   3 -12 19572.5 1077.70   1
   2  -3  12 14956.9 982.359   1
   2  -3  13 2877.67 555.397   1
  -2   3 -13 3761.14 580.546   1
   2  -3  14 86.7379 203.593   1
   2  -3  15 3575.31 579.513   1
   2  -3  16 845.428 403.015   1
   2  -3  17 5424.45 744.726   1
   2  -3  18-25.0390 227.880   1
   2  -3  19 207.552 246.215   1
   2  -3  20-138.413 291.900   1
   2  -3  21-308.257 263.405   1
   2  -3  22-385.367 315.358   1
   2  -3  22-693.367 434.821   5
  -2   2  20 926.372 472.546   5
  -2   2  19 3535.21 805.041   5
  -2   2  18 1363.84 487.096   5
  -2   2  17 5822.99 937.842   5
  -2   2  16 810.560 424.275   5
  -2   2  15 3374.98 669.615   5
  -2   2  14 2894.64 615.510   5
  -2   2  14 2341.28 356.394   4
  -2   2  13 11573.5 1134.93   5
  -2   2  13 11480.5 739.383   4
   2  -2 -12 6325.26 691.161   1
  -2   2  12 5616.56 774.722   5
  -2   2  12 4975.87 483.595   4
  -2   2  11 1096.43 406.406   5
   2  -2 -11 520.252 230.465   1
  -2   2  11 711.571 186.325   4
   2  -2 -10 376.147 174.760   1
  -2   2  10 455.355 261.591   5
  -2   2  10 306.096 124.574   4
  -2   2   9 11983.8 957.973   5
   2  -2  -9 11443.4 770.309   1
   2  -2  -9 12581.9 642.135   4
  -2   2   9 12283.8 677.199   4
  -2   2   8 11656.3 876.270   5
   2  -2  -8 11554.2 606.151   4
   2  -2  -8 10308.2 669.063   1
  -2   2   8 11392.0 632.839   4
  -2   2   7 11534.9 826.491   5
   2  -2  -7 10779.7 586.016   4
   2  -2  -6 3936.23 343.868   4
  -2   2   6 3661.14 439.631   5
  -2   2   5 13465.0 773.338   5
   2  -2  -5 13607.2 624.845   4
   2  -2  -5 14054.9 841.939   5
  -2   2   4 618.956 141.716   5
  -2   2   4 880.554 107.097   2
   2  -2  -4 1037.56 170.135   4
   2  -2  -4 997.674 213.563   5
  -2   2   3 52888.3 685.364   2
  -2   2   3 54445.8 1262.76   5
   2  -2  -3 50876.1 1337.90   5
   2  -2  -3 53172.4 1173.15   4
  -2   2   2 12772.9 526.161   3
  -2   2   2 12449.0 553.165   5
  -2   2   2 13177.7 302.430   2
   2  -2  -2 12610.8 607.725   5
  -2   2   1 4583.08 313.422   3
   2  -2  -1 5295.36 346.544   5
  -2   2   1 4993.65 321.646   5
   2  -2   0 293971. 2301.77   5
   2  -2   0 294638. 1434.12   2
  -2   2   0 297513. 2352.92   3
  -2   2   0 285855. 2135.79   5
   2  -2   1 139697. 1500.32   5
  -2   2  -1 140690. 1417.88   5
   2  -2   1 138697. 1445.73   1
   2  -2   2 11762.3 429.015   5
  -2   2  -2 12277.4 446.127   1
   2  -2   2 11445.4 433.337   1
  -2   2  -3 64148.9 1125.99   1
   2  -2   3 57430.4 1032.63   1
   2  -2   4 2133.74 222.485   1
  -2   2  -4 2191.42 230.865   1
  -2   2  -5 9610.39 501.514   1
   2  -2   5 10332.7 513.158   1
   2  -2   6 63.3648 85.1837   1
  -2   2  -6 24.0607 60.6060   1
   2  -2   7 53.8725 85.9766   1
  -2   2  -7 86.8577 74.3625   1
   2  -2   8 2260.13 310.525   1
   2  -2   9 23268.7 1053.50   1
   2  -2  10 73.0128 112.467   1
  -2   2 -10 21.6669 67.4862   1
  -2   2 -11 127.957 155.397   1
   2  -2  11 150.021 169.233   1
   2  -2  12 89.1621 170.145   1
  -2   2 -12-60.4236 123.714   1
   2  -2  13 6295.02 707.021   1
   2  -2  14 3643.36 556.124   1
   2  -2  15 124.238 183.482   1
   2  -2  16 3711.57 596.000   1
   2  -2  17 124.553 159.329   1
   2  -2  18 2694.73 523.115   1
   2  -2  19 1024.64 390.935   1
   2  -2  20 224.125 275.817   5
   2  -2  20 890.898 362.150   1
   2  -2  21-317.166 365.632   5
   2  -2  22 442.363 414.586   5
  -2   1  21 814.987 453.857   5
  -2   1  20 488.484 444.318   5
  -2   1  19 136.228 336.134   5
  -2   1  18 574.608 359.058   5
  -2   1  17 1723.54 334.768   4
  -2   1  17 2455.49 632.303   5
  -2   1  16 2771.58 652.743   5
  -2   1  16 2141.98 346.291   4
  -2   1  15 674.451 394.060   5
  -2   1  15 211.601 107.593   4
  -2   1  14 79.9869 201.425   5
  -2   1  14 110.337 89.0994   4
  -2   1  13 2710.37 574.725   5
  -2   1  13 2759.25 368.703   4
   2  -1 -12 3891.61 551.049   1
  -2   1  12 4600.06 676.169   5
  -2   1  12 4029.38 435.538   4
  -2   1  11 8515.91 890.649   5
  -2   1  11 8652.53 604.703   4
   2  -1 -11 10165.6 765.533   1
  -2   1  10 34835.0 1683.23   5
   2  -1 -10 35618.4 1382.04   1
  -2   1  10 35692.5 1202.96   4
  -2   1   9 13995.3 999.853   5
   2  -1  -9 13635.2 802.594   1
  -2   1   9 12794.3 695.272   4
  -2   1   8 15409.6 644.896   2
   2  -1  -8 12417.2 728.128   1
   2  -1  -8 14568.9 661.420   4
  -2   1   8 14886.4 980.062   5
  -2   1   8 15733.9 741.124   4
  -2   1   7 127213. 1736.36   2
  -2   1   7 131862. 2719.66   5
  -2   1   7 130343. 2061.45   4
   2  -1  -7 130198. 1961.22   4
  -2   1   6 21401.6 1030.80   5
  -2   1   6 22507.5 665.102   2
   2  -1  -6 21804.4 1095.89   5
   2  -1  -6 21816.9 780.051   4
  -2   1   6 20708.7 790.733   4
  -2   1   5 38030.7 790.214   2
   2  -1  -5 39485.6 1350.16   5
  -2   1   5 41053.0 1284.38   5
   2  -1  -5 40484.1 1047.94   4
  -2   1   5 37707.0 1018.90   4
  -2   1   4 118684. 1232.57   2
  -2   1   4 124161. 1766.68   4
   2  -1  -4 119471. 2155.76   5
   2  -1  -4 125033. 1790.83   4
  -2   1   4 121426. 2022.37   5
   2  -1  -3 25113.0 485.140   2
  -2   1   3 24630.8 819.142   5
  -2   1   3 25077.0 527.844   2
   2  -1  -3 24610.0 877.079   5
  -2   1   2 18810.3 605.099   3
  -2   1   2 19469.8 443.382   2
   2  -1  -2 19058.1 386.460   2
  -2   1   2 18847.9 614.490   5
   2  -1  -2 19141.3 680.464   5
  -2   1   1 404510. 2734.34   3
   2  -1  -1 400647. 2634.95   5
  -2   1   1 406805. 2447.11   5
   2  -1  -1 403687. 1886.08   2
  -2   1   1 396213. 2030.67   2
  -2   1   0 3687.45 250.064   3
   2  -1   0 3584.83 255.408   3
  -2   1   0 3672.65 209.064   5
   2  -1   0 3574.19 221.844   5
   2  -1   0 3514.31 216.426   2
   2  -1   0 3467.22 206.144   1
   2  -1   1 20383.8 497.382   1
   2  -1   1 20635.5 510.188   5
  -2   1  -1 20253.3 515.330   1
   2  -1   1 20702.3 598.908   3
  -2   1  -2 510033. 2965.91   1
   2  -1   2 511246. 2709.79   1
  -2   1  -3 2357.97 207.763   1
   2  -1   3 2504.36 215.882   1
  -2   1  -4 4600.62 338.245   1
   2  -1   4 3815.86 312.678   1
   2  -1   5 6485.61 406.579   1
  -2   1  -5 6147.56 413.469   1
   2  -1   6 3033.56 407.162   1
  -2   1  -6 4937.17 428.623   1
   2  -1   7 39953.1 1230.53   1
  -2   1  -7 41794.8 1228.97   1
   2  -1   8 30020.7 1100.04   1
   2  -1   9 37181.2 1298.13   1
   2  -1  10 28920.3 1290.09   1
  -2   1 -10 35865.7 1343.82   1
   2  -1  11 28051.9 1297.36   1
  -2   1 -11 30269.9 1259.47   1
  -2   1 -12 2106.76 399.360   1
   2  -1  12 1844.90 438.135   1
   2  -1  13 4765.00 674.742   1
   2  -1  14 6911.24 773.057   1
   2  -1  15 3781.54 586.254   1
   2  -1  16 6646.97 865.724   1
   2  -1  17 38.6633 205.754   1
   2  -1  18 1799.68 466.726   1
   2  -1  18 1364.34 441.414   5
   2  -1  19-413.024 438.981   5
   2  -1  20-663.229 415.434   5
   2  -1  21-474.174 445.175   5
  -2   0  21 867.954 441.282   5
  -2   0  20 357.027 317.291   5
  -2   0  19 1495.40 531.395   5
  -2   0  18 150.070 218.524   5
  -2   0  17 2780.11 410.484   4
  -2   0  17 2402.40 615.001   5
  -2   0  16 5087.15 553.603   4
  -2   0  16 5465.79 869.406   5
  -2   0  15 2166.18 538.370   5
  -2   0  15 2054.15 329.376   4
  -2   0  14 9886.19 675.934   2
  -2   0  14 9754.56 708.380   4
  -2   0  14 10413.4 1088.83   5
   2   0 -13 14283.1 957.359   1
  -2   0  13 14444.0 782.488   2
  -2   0  13 14366.2 1241.95   5
  -2   0  13 14122.3 836.336   4
  -2   0  12 24630.0 1052.19   4
  -2   0  12 24579.7 996.299   2
   2   0 -12 26117.8 1237.97   1
  -2   0  12 25652.3 1554.21   5
  -2   0  11 2500.23 311.572   2
   2   0 -11 2413.69 378.456   1
  -2   0  11 2364.07 472.544   5
  -2   0  11 2226.12 317.910   4
  -2   0  10 41520.3 1818.95   5
  -2   0  10 44150.3 1325.61   4
  -2   0   9 23532.5 841.052   2
   2   0  -9 20001.0 1063.31   1
  -2   0   9 22261.8 1266.07   5
  -2   0   9 23284.1 926.402   4
  -2   0   8 50554.8 1166.74   2
   2   0  -8 51854.1 1431.42   1
  -2   0   8 46594.5 1703.78   5
  -2   0   8 49023.7 1310.58   4
  -2   0   7 4502.28 322.080   2
   2   0  -7 3584.74 357.258   1
  -2   0   7 3800.10 455.242   5
  -2   0   7 3712.95 342.851   4
   2   0  -7 3671.96 332.719   4
  -2   0   6 6647.82 363.506   2
   2   0  -6 6504.25 423.755   1
  -2   0   6 6892.23 456.790   4
   2   0  -6 6709.39 428.715   4
  -2   0   6 7062.90 579.503   5
  -2   0   5 16034.5 516.839   2
   2   0  -5 15749.9 817.461   5
  -2   0   5 17721.7 821.928   5
  -2   0   5 16263.0 670.420   4
   2   0  -5 17479.8 661.353   4
   2   0  -4 13824.7 678.463   5
  -2   0   4 14559.7 606.514   4
  -2   0   4 14602.2 665.537   5
   2   0  -4 13373.1 430.110   2
  -2   0   4 14866.5 470.514   2
   2   0  -3 38172.8 659.125   2
  -2   0   3 38727.4 949.466   5
  -2   0   3 36940.7 918.010   4
  -2   0   3 39314.9 746.853   2
   2   0  -3 35638.7 970.273   5
   2   0  -2 507098. 3096.39   5
  -2   0   2 508394. 2624.16   2
   2   0  -2 502423. 2505.43   2
  -2   0   2 506690. 2803.08   5
  -2   0   1 52.6452 48.7462   2
   2   0  -1 31.7332 42.8633   5
  -2   0   1 44.9464 67.7791   3
  -2   0   1 28.3388 34.1416   5
   2   0  -1 41.3193 44.0606   2
   2   0  -1-3.14460 59.2096   4
   2   0   0 8938.11 372.806   3
  -2   0   0 8981.71 400.003   2
   2   0   0 8159.78 278.683   5
   2   0   0 8878.29 400.713   2
   2   0   0 9329.91 283.036   1
  -2   0   0 8593.61 364.795   3
   2   0   1 437807. 3080.62   2
   2   0   1 434075. 2570.48   3
   2   0   1 422979. 2098.84   1
  -2   0  -1 435849. 2279.76   1
  -2   0  -2 34756.4 684.951   1
   2   0   2 36664.3 704.951   1
  -2   0  -3 32114.2 751.705   1
   2   0   3 28519.8 699.710   1
   2   0   4 2761.67 251.049   1
  -2   0  -4 2167.26 228.288   1
   2   0   5 1937.50 247.846   1
  -2   0  -5 2325.75 244.027   1
   2   0   6 29449.5 972.069   1
  -2   0  -6 32604.2 989.210   1
   2   0   7 759.975 194.835   1
  -2   0  -7 550.271 174.957   1
   2   0   8 117.813 109.148   1
   2   0   9 366.708 172.873   1
  -2   0 -10 16169.9 921.690   1
   2   0  10 15792.7 961.179   1
   2   0  11 8549.56 729.354   1
  -2   0 -11 5813.28 659.884   1
  -2   0 -12 48.4785 94.7043   1
   2   0  12 114.061 156.769   1
   2   0  13 143.621 178.009   1
   2   0  14 3421.31 560.261   1
   2   0  15 1439.03 377.148   1
   2   0  16 974.933 388.952   1
   2   0  16 887.555 364.054   5
   2   0  17-356.507 453.422   5
   2   0  18-97.4820 228.986   5
   2   0  19-185.923 313.192   5
   2   0  20-215.135 270.001   5
   2   0  21-181.237 355.044   5
  -2  -1  22 188.857 268.159   5
  -2  -1  21-102.853 297.505   5
  -2  -1  20 343.421 245.174   5
  -2  -1  19 528.444 278.542   5
  -2  -1  18-94.5173 267.860   5
  -2  -1  17 2930.37 675.581   5
  -2  -1  17 2386.00 386.318   4
  -2  -1  16 1043.98 411.520   5
  -2  -1  16 914.381 241.501   4
  -2  -1  15 6550.80 602.029   4
  -2  -1  15 7567.50 949.783   5
  -2  -1  14 13739.0 830.229   4
  -2  -1  14 12333.6 746.089   2
  -2  -1  14 13144.4 1190.86   5
   2   1 -13 2583.30 407.455   1
  -2  -1  13 2536.04 349.039   4
  -2  -1  13 1972.92 454.968   5
  -2  -1  13 2192.34 313.555   2
  -2  -1  12 2037.17 294.425   2
  -2  -1  12 2056.86 316.082   4
  -2  -1  12 1958.49 436.938   5
   2   1 -11 11803.9 813.913   1
  -2  -1  11 13690.9 761.607   4
  -2  -1  11 13791.0 1084.08   5
  -2  -1  10 1970.59 393.961   5
  -2  -1  10 2024.36 293.476   4
   2   1 -10 2595.15 357.300   1
  -2  -1   9 8775.62 776.925   5
  -2  -1   9 9554.57 534.380   2
   2   1  -9 7687.25 576.608   1
  -2  -1   9 9002.12 577.614   4
   2   1  -8 12038.7 665.189   1
  -2  -1   8 10727.2 783.845   5
  -2  -1   8 10722.5 612.218   4
  -2  -1   8 11181.9 549.281   2
   2   1  -7 877.115 188.252   1
  -2  -1   7 891.773 143.040   2
  -2  -1   7 1022.57 188.475   4
  -2  -1   7 746.476 190.012   5
  -2  -1   6 1332.83 233.680   5
   2   1  -6 1637.03 184.177   2
   2   1  -6 1317.09 191.052   1
  -2  -1   6 1379.12 166.333   2
  -2  -1   6 1342.66 198.602   4
   2   1  -6 1371.77 197.767   4
   2   1  -5 47556.3 893.201   2
  -2  -1   5 47678.5 949.944   2
  -2  -1   5 46010.7 1282.16   5
   2   1  -5 48263.6 977.664   1
  -2  -1   5 46334.7 1122.35   4
   2   1  -4 399.833 90.4668   2
  -2  -1   4 384.434 92.7688   2
   2   1  -4 406.829 83.4913   1
  -2  -1   4 330.133 118.129   5
  -2  -1   4 366.337 111.896   4
   2   1  -3 704062. 3285.55   2
  -2  -1   3 711415. 4002.45   4
  -2  -1   3 694201. 3544.36   2
  -2  -1   3 707860. 3642.62   5
   2   1  -3 697401. 3949.24   5
   2   1  -2 59286.8 1094.78   4
   2   1  -2 57207.0 911.916   5
  -2  -1   2 58393.7 1095.00   4
  -2  -1   2 59024.5 1017.59   2
  -2  -1   2 57296.3 797.134   5
   2   1  -2 58507.2 989.913   2
  -2  -1   1 18629.9 521.221   3
  -2  -1   1 16612.9 571.064   2
   2   1  -1 17677.1 569.378   4
   2   1  -1 17629.8 564.352   2
   2   1  -1 17560.7 386.917   5
  -2  -1   1 19182.4 334.444   5
  -2  -1   1 17611.0 564.396   4
  -2  -1   0 676848. 3028.99   3
   2   1   0 685562. 3090.47   3
   2   1   0 691785. 3379.98   4
   2   1   0 689802. 3931.30   2
  -2  -1   0 684731. 3955.21   2
   2   1   1 6141.45 283.445   3
   2   1   1 4639.03 349.774   2
   2   1   1 6246.87 243.727   1
  -2  -1  -1 5557.41 228.291   1
   2   1   1 5769.82 292.423   4
   2   1   2 72230.3 1034.12   1
  -2  -1  -2 64022.3 985.003   1
  -2  -1  -3 108458. 1379.73   1
   2   1   3 117301. 1480.20   1
  -2  -1  -4 48267.0 1034.73   1
   2   1   4 43188.4 1173.25   1
   2   1   5 10344.1 580.258   1
  -2  -1  -5 10272.0 506.496   1
   2   1   6 81471.9 1755.61   1
  -2  -1  -6 74270.2 1519.58   1
   2   1   7 24057.0 1037.60   1
  -2  -1  -7 29393.9 1015.81   1
   2   1   8 19292.4 946.147   1
  -2  -1  -9 38742.5 1316.27   1
   2   1   9 35337.0 1332.75   1
  -2  -1 -10 234.014 154.910   1
   2   1  10 314.431 149.516   1
  -2  -1 -11 40.3876 127.023   1
   2   1  11-51.5322 152.180   1
  -2  -1 -12 51.6189 122.805   1
   2   1  12 30.3980 136.804   1
   2   1  13 2917.32 235.068   4
   2   1  13 3358.19 501.931   1
   2   1  14 3457.04 584.692   1
   2   1  14 3363.71 651.825   5
   2   1  14 3465.58 273.299   4
   2   1  15 291.820 199.828   5
   2   1  15 330.225 96.7953   4
   2   1  16-217.683 315.804   5
   2   1  17 966.842 333.533   5
   2   1  18-601.860 417.179   5
   2   1  19 639.560 327.102   5
   2   1  20-58.3977 239.365   5
   2   1  21-67.8068 243.911   5
  -2  -2  22 1186.52 531.149   5
  -2  -2  21 721.176 378.813   5
  -2  -2  20 3120.74 771.575   5
  -2  -2  19 460.212 379.379   5
  -2  -2  18 4816.44 846.919   5
  -2  -2  17 1791.09 339.850   4
  -2  -2  17 1940.30 517.217   5
  -2  -2  16 228.104 139.900   4
  -2  -2  16 178.266 220.187   5
  -2  -2  15 6945.43 629.915   4
  -2  -2  15 6454.48 881.399   5
  -2  -2  14 460.743 176.426   4
  -2  -2  14 512.844 166.566   2
  -2  -2  14 292.961 178.001   5
   2   2 -14 552.054 197.974   1
   2   2 -13 572.219 230.086   1
  -2  -2  13 564.957 236.946   5
  -2  -2  13 825.640 211.292   4
  -2  -2  13 718.321 188.552   2
  -2  -2  12 2703.99 349.130   2
   2   2 -12 1441.46 392.645   1
  -2  -2  12 2230.30 453.705   5
  -2  -2  12 2665.18 356.170   4
  -2  -2  11 914.906 226.903   5
   2   2 -11 1215.95 294.480   1
  -2  -2  11 1271.92 239.220   4
   2   2 -10 7552.51 579.620   1
  -2  -2  10 5639.62 643.619   5
  -2  -2  10 6240.01 496.873   4
  -2  -2   9 121.673 90.5349   1
  -2  -2   9 209.550 107.703   2
   2   2  -9 157.861 107.908   1
  -2  -2   9 236.536 128.391   4
  -2  -2   9 49.3503 184.053   5
  -2  -2   8 9975.27 572.006   1
  -2  -2   8 11029.0 618.077   4
  -2  -2   8 10852.8 552.597   2
  -2  -2   8 10900.7 785.457   5
   2   2  -8 11169.5 612.974   1
  -2  -2   7 19953.2 792.673   4
   2   2  -7 20843.1 688.402   2
  -2  -2   7 20029.8 703.324   2
   2   2  -7 19727.4 740.184   1
  -2  -2   7 20800.6 1008.80   5
  -2  -2   6 574.464 131.745   2
   2   2  -6 624.062 127.722   2
   2   2  -6 645.431 137.787   1
  -2  -2   6 404.334 125.752   5
  -2  -2   6 563.586 135.453   4
   2   2  -5 23417.9 661.507   2
   2   2  -5 22498.7 636.658   1
  -2  -2   5 22838.0 699.455   2
  -2  -2   5 22088.9 868.791   5
  -2  -2   5 23361.9 782.370   4
  -2  -2   4 56582.6 1119.28   2
   2   2  -4 62530.0 876.126   1
   2   2  -4 60326.8 1066.07   2
  -2  -2   4 54509.8 1149.80   4
  -2  -2   4 55713.6 1167.77   5
   2   2  -3 38928.8 860.393   2
   2   2  -3 36756.5 532.219   1
  -2  -2   3 35135.3 763.743   5
  -2  -2   3 36582.4 905.803   4
  -2  -2   3 37240.0 904.688   2
   2   2  -3 35732.0 852.140   4
   2   2  -2 80427.3 1307.82   2
  -2  -2   2 80151.1 1264.35   4
   2   2  -2 80056.9 1228.24   4
  -2  -2   2 74526.0 1289.57   2
  -2  -2   1 463152. 2421.96   3
  -2  -2   1 458055. 3351.79   2
   2   2  -1 469331. 3302.25   2
   2   2  -1 471378. 2822.97   4
  -2  -2   1 456527. 2884.46   4
  -2  -2   0 5301.07 387.406   2
  -2  -2   0 5275.56 182.763   1
   2   2   0 5391.78 245.886   3
   2   2   0 5179.51 179.369   1
  -2  -2   0 4585.15 275.505   4
   2   2   0 5992.53 428.289   2
   2   2   0 4985.78 278.208   4
   2   2   1 21261.4 486.326   3
  -2  -2  -1 20089.4 441.553   1
   2   2   1 17826.1 482.345   1
   2   2   1 21411.9 535.224   4
   2   2   1 21012.2 817.330   2
   2   2   2 4769.40 284.583   1
  -2  -2  -2 5220.37 281.399   1
   2   2   2 4673.15 235.894   4
   2   2   3 1191.47 173.222   1
  -2  -2  -3 732.905 172.730   1
   2   2   3 1521.72 124.646   4
   2   2   4 336.892 99.5088   1
  -2  -2  -4 542.543 124.037   1
   2   2   5 9850.28 548.285   1
  -2  -2  -5 9537.85 543.927   1
  -2  -2  -6 200.929 93.2962   1
   2   2   6 212.443 100.653   1
   2   2   7 12060.8 752.720   1
   2   2   8 92.0935 134.213   1
  -2  -2  -9 210.963 161.803   1
   2   2   9 437.984 182.323   1
  -2  -2 -10 420.509 218.679   1
   2   2  10 370.999 68.0230   4
   2   2  10 182.990 117.549   1
   2   2  10 410.465 160.476   5
   2   2  11 264.978 65.0684   4
  -2  -2 -11 252.967 197.518   1
   2   2  11 145.366 181.400   5
   2   2  12 123.289 43.0193   4
   2   2  12-96.0140 255.026   5
   2   2  13 3195.88 210.370   4
   2   2  13 2842.19 585.645   5
   2   2  14 1801.43 480.884   5
   2   2  14 1799.81 163.824   4
   2   2  15 4893.47 816.929   5
   2   2  16 358.966 215.880   5
   2   2  17 1531.78 528.259   5
   2   2  18-107.480 306.956   5
   2   2  19 942.433 419.780   5
   2   2  20 407.663 298.844   5
  -2  -3  23-56.3329 246.048   5
  -2  -3  22-10.4617 294.175   5
  -2  -3  21 86.8866 251.001   5
  -2  -3  20 176.128 236.005   5
  -2  -3  19 781.565 368.057   5
  -2  -3  18 128.152 215.195   5
  -2  -3  17 152.815 242.795   5
  -2  -3  16 1359.56 287.552   4
  -2  -3  16 799.406 268.079   5
  -2  -3  15 1261.69 270.488   4
  -2  -3  15 921.807 306.211   5
   2   3 -14 1150.32 273.014   1
  -2  -3  14 926.584 306.260   1
  -2  -3  14 972.952 274.346   5
  -2  -3  14 1377.13 265.512   2
  -2  -3  14 1526.08 286.922   4
  -2  -3  13 31394.9 1348.09   1
  -2  -3  13 32010.8 1200.02   2
   2   3 -13 33103.8 1383.88   1
  -2  -3  13 31223.7 1256.36   4
   2   3 -12 3405.80 472.014   1
  -2  -3  12 3062.87 414.759   1
  -2  -3  12 3577.91 395.412   2
  -2  -3  12 3532.87 411.984   4
  -2  -3  11 3170.48 399.480   1
  -2  -3  11 3797.92 404.010   4
   2   3 -10 48949.2 1404.33   1
  -2  -3  10 50579.9 1426.44   1
  -2  -3  10 48906.9 1406.85   4
  -2  -3   9 31255.0 1075.64   4
  -2  -3   9 30160.6 1052.66   1
  -2  -3   9 29934.5 976.564   2
   2   3  -9 31238.9 1065.15   1
  -2  -3   8 22281.1 886.080   4
   2   3  -8 23001.1 787.420   2
  -2  -3   8 24330.8 845.930   2
   2   3  -8 24552.2 878.733   1
   2   3  -7 67225.9 1283.64   2
  -2  -3   7 70583.5 1324.75   1
  -2  -3   7 68815.8 1472.99   4
  -2  -3   7 71348.1 1416.98   2
  -2  -3   6 5925.92 409.171   4
  -2  -3   6 6457.43 358.707   1
   2   3  -6 5727.43 363.570   2
  -2  -3   6 5943.08 393.195   2
   2   3  -6 6240.08 363.214   1
  -2  -3   5 23415.8 586.534   1
  -2  -3   5 23728.6 769.561   2
   2   3  -5 21462.3 697.077   2
  -2  -3   5 21565.3 748.004   4
  -2  -3   4 125886. 1790.58   2
   2   3  -4 121570. 1650.61   2
  -2  -3   4 124588. 1121.28   1
  -2  -3   4 118764. 1700.07   4
   2   3  -3 352637. 2880.83   2
  -2  -3   3 347194. 2800.23   4
   2   3  -2 51265.3 1132.70   2
  -2  -3   2 47952.8 972.937   4
   2   3  -1 71033.1 1422.87   2
  -2  -3   1 76371.2 894.907   3
  -2  -3   1 75928.1 1497.13   2
  -2  -3   1 73200.3 1142.36   4
  -2  -3   0 8412.29 360.743   4
   2   3   0 8921.77 542.796   2
  -2  -3   0 8513.78 273.159   1
   2   3   0 8311.69 334.129   4
  -2  -3   0 8718.08 526.781   2
  -2  -3  -1 3497.82 209.410   4
   2   3   1 3795.88 372.006   2
  -2  -3  -1 3282.63 216.324   1
   2   3   1 3539.93 228.715   5
   2   3   1 3560.82 177.392   3
   2   3   1 3514.92 200.574   4
   2   3   2 270.137 60.8099   4
   2   3   2 97.1296 128.838   2
  -2  -3  -2 143.031 51.3086   1
   2   3   2 115.830 63.3833   5
   2   3   3 98.0081 40.3140   4
  -2  -3  -3 29.5144 50.7795   1
  -2  -3  -4 45287.6 1181.67   1
   2   3   4 43245.4 1321.73   5
   2   3   5 3392.67 392.416   5
  -2  -3  -5 3634.58 367.251   1
   2   3   6 15069.4 930.992   5
  -2  -3  -6 14382.0 776.009   1
   2   3   7 54650.0 1888.89   5
   2   3   8 400.939 186.507   5
  -2  -3  -8 561.704 193.902   1
  -2  -3  -9 36005.5 1404.07   1
   2   3   9 33395.4 1668.25   5
  -2  -3 -10 6790.71 640.243   1
   2   3  10 6285.98 751.291   5
  -2  -3 -11 9155.11 784.832   1
   2   3  11 8306.24 921.341   5
   2   3  12 12293.9 1155.94   5
   2   3  13 9560.68 1063.48   5
   2   3  14 186.025 240.159   5
   2   3  15-224.708 283.331   5
   2   3  16 1994.04 554.264   5
   2   3  17 108.821 245.107   5
   2   3  18 291.667 323.699   5
   2   3  19 155.071 310.555   5
   2   3  20 342.694 402.378   5
  -2  -4  23-448.372 441.463   5
  -2  -4  22 54.4728 279.820   5
  -2  -4  21 855.192 437.247   5
  -2  -4  20 950.649 383.137   5
  -2  -4  19 4479.23 851.012   5
  -2  -4  18 138.257 267.227   5
  -2  -4  17-79.6193 186.662   1
  -2  -4  17-282.120 388.372   5
  -2  -4  16 6080.45 668.916   1
  -2  -4  16 6770.19 636.481   4
  -2  -4  15 19373.2 1136.00   1
   2   4 -15 18495.8 1055.43   1
  -2  -4  15 17801.6 1020.82   4
  -2  -4  14 27059.4 1191.76   4
  -2  -4  14 26382.8 1304.28   1
  -2  -4  14 28151.4 1162.99   2
  -2  -4  13 3660.47 513.004   1
  -2  -4  13 4521.61 451.095   2
   2   4 -13 2878.01 452.550   1
  -2  -4  13 4542.64 481.558   4
   2   4 -12 33645.9 1209.28   1
  -2  -4  12 31248.6 1196.96   4
  -2  -4  12 32126.5 1266.51   1
  -2  -4  12 32851.8 1187.50   2
   2   4 -11 5573.05 492.633   1
  -2  -4  11 5766.27 562.035   1
  -2  -4  11 6834.68 511.461   2
  -2  -4  11 6321.78 519.151   4
  -2  -4  10 56349.4 1527.56   1
  -2  -4  10 56735.1 1496.84   4
   2   4  -9 3233.02 319.449   2
  -2  -4   9 3364.39 343.975   1
   2   4  -9 2290.26 280.445   1
  -2  -4   8 7943.91 490.759   1
  -2  -4   8 8500.19 518.242   2
   2   4  -8 9730.15 484.019   1
   2   4  -8 9043.21 503.064   2
  -2  -4   7 1736.36 216.390   1
  -2  -4   7 1391.60 207.532   2
   2   4  -7 1217.75 187.167   2
   2   4  -7 934.659 157.022   1
  -2  -4   6 8554.25 432.532   1
   2   4  -6 8788.77 475.606   2
  -2  -4   6 9796.34 536.160   2
   2   4  -6 8404.81 389.709   1
  -2  -4   5 320.275 73.4904   1
  -2  -4   5 335.264 103.141   4
   2   4  -5 278.663 85.4442   2
  -2  -4   5 322.790 106.687   2
   2   4  -5 284.887 78.1548   1
  -2  -4   4 8764.73 293.321   1
   2   4  -4 7482.12 442.748   2
  -2  -4   4 7131.54 410.168   4
  -2  -4   4 7758.58 487.397   2
  -2  -4   3 191.335 77.2948   4
  -2  -4   3 121.614 70.4380   2
   2   4  -3 112.612 81.7046   2
   2   4  -2 20353.1 787.046   2
  -2  -4   2 21461.5 648.648   4
  -2  -4   1 16581.4 361.511   3
   2   4  -1 14728.5 688.559   2
  -2  -4   1 16813.3 544.916   4
  -2  -4   0 4706.95 228.975   1
   2   4   0 4650.77 210.536   5
  -2  -4   0 4749.15 270.516   4
   2   4   0 4762.26 422.460   2
  -2  -4  -1 5901.55 276.381   4
  -2  -4  -1 6029.08 314.085   1
   2   4   1 6068.35 313.492   5
   2   4   1 5515.15 194.189   3
   2   4   1 5727.96 483.730   2
   2   4   2-40.5719 180.518   2
  -2  -4  -2 119.113 73.2385   1
   2   4   2 249.885 110.778   5
  -2  -4  -3 48469.2 1161.68   1
   2   4   3 50437.7 1286.85   5
  -2  -4  -4 363.447 147.460   1
   2   4   4 456.361 151.308   5
  -2  -4  -5 85.5131 83.0128   1
   2   4   5 47.3233 92.9923   5
  -2  -4  -6 370.569 163.994   1
   2   4   6 532.564 192.373   5
   2   4   7 12757.4 931.052   5
   2   4   8 2372.17 445.009   5
  -2  -4  -8 1937.11 359.359   1
  -2  -4  -9 18375.8 1039.82   1
   2   4   9 15075.4 1133.64   5
  -2  -4 -10 426.139 218.759   1
   2   4  10 453.533 235.508   5
   2   4  11 1474.02 430.168   5
   2   4  12 1113.09 370.255   5
   2   4  13 189.467 249.167   5
   2   4  14 1064.46 398.926   5
   2   4  15 54.8935 241.743   5
   2   4  16 425.659 289.898   5
   2   4  17 182.700 257.541   5
   2   4  18 455.623 354.911   5
   2   4  19 443.210 402.057   5
  -2  -5  23-150.266 277.828   5
  -2  -5  22-120.350 360.925   5
  -2  -5  21 1012.15 447.083   5
  -2  -5  20-960.801 453.042   5
  -2  -5  19-47.0993 390.191   5
  -2  -5  19-108.906 165.326   1
  -2  -5  18 1986.87 416.164   1
  -2  -5  17 10871.0 928.328   1
  -2  -5  16 1264.37 299.048   4
  -2  -5  16 1348.59 350.058   1
  -2  -5  15 2010.08 389.830   1
   2   5 -15 1759.09 353.313   1
  -2  -5  15 2603.61 394.946   4
  -2  -5  14 9743.21 814.811   1
  -2  -5  14 9436.24 692.539   2
   2   5 -14 9876.52 756.465   1
  -2  -5  14 10187.2 741.484   4
  -2  -5  13 4530.41 538.415   1
  -2  -5  13 4778.65 477.844   2
  -2  -5  12 4995.09 568.936   1
  -2  -5  12 5980.62 522.636   2
   2   5 -12 6188.44 538.196   1
  -2  -5  11 2714.51 388.039   1
  -2  -5  11 3196.50 374.890   2
   2   5 -11 2195.32 350.699   1
  -2  -5  10 1037.83 223.171   1
   2   5 -10 1007.06 202.822   2
   2   5 -10 881.541 192.004   1
   2   5  -9 12176.8 632.768   2
  -2  -5   9 14649.4 701.131   1
   2   5  -9 13969.6 640.319   1
   2   5  -8 5072.02 394.423   2
  -2  -5   8 4889.17 376.946   1
   2   5  -7 55873.5 1090.26   1
   2   5  -7 51827.6 1227.79   2
  -2  -5   7 51599.8 1097.31   1
   2   5  -6 57976.9 1299.49   2
   2   5  -6 54927.7 937.042   1
   2   5  -5 52028.7 1231.86   2
  -2  -5   5 55656.3 834.056   1
  -2  -5   5 51649.7 1316.55   2
   2   5  -4 53036.8 1281.12   2
  -2  -5   4 61765.7 791.063   1
  -2  -5   3 42270.6 583.822   1
   2   5  -3 45495.1 1204.88   2
  -2  -5   2 8325.75 274.767   5
   2   5  -2 8842.55 531.289   2
  -2  -5   1 54700.2 553.665   3
  -2  -5   1 53218.2 852.878   5
   2   5  -1 54368.9 655.224   5
   2   5  -1 52121.2 1385.25   2
  -2  -5   1 53442.8 983.785   4
   2   5   0 100321. 1135.51   5
  -2  -5   0 104303. 1467.09   5
  -2  -5   0 102199. 1312.14   4
   2   5   1 41607.6 896.794   5
  -2  -5  -1 39489.6 877.578   1
   2   5   1 41796.5 1379.63   2
  -2  -5  -1 37721.0 720.750   4
  -2  -5  -2 58981.3 1217.24   1
   2   5   2 62051.4 1754.60   2
  -2  -5  -2 58410.1 763.608   4
   2   5   2 59717.6 1271.11   5
  -2  -5  -3 23778.5 848.522   1
   2   5   3 21275.6 845.695   5
   2   5   3 21151.8 1078.55   2
   2   5   4 52011.6 1714.10   2
  -2  -5  -4 50927.8 1370.83   1
   2   5   5 3064.90 407.075   5
  -2  -5  -5 2677.08 351.347   1
   2   5   6 20677.8 1103.74   5
   2   5   7 3156.77 478.247   5
  -2  -5  -7 1505.39 393.941   1
   2   5   8 962.227 308.892   5
  -2  -5  -8 364.290 219.502   1
   2   5   9 1630.99 412.587   5
  -2  -5  -9 798.622 297.688   1
   2   5  10 502.628 264.988   5
  -2  -5 -10 208.298 165.958   1
   2   5  11 1098.58 344.115   5
   2   5  12 1587.64 461.576   5
   2   5  13 29.6525 170.288   5
   2   5  14 633.150 345.040   5
   2   5  15 203.416 265.791   5
   2   5  16 392.969 331.702   5
   2   5  17 546.368 357.466   5
   2   5  18 1075.79 513.121   5
   2   5  19 378.335 368.937   5
  -2  -6  24 100.299 267.496   5
  -2  -6  23 24.2518 308.582   5
  -2  -6  22 1214.88 407.462   5
  -2  -6  21 10.7932 210.480   1
  -2  -6  21-652.342 481.634   5
  -2  -6  20 7971.59 891.760   1
  -2  -6  19-271.993 218.458   1
  -2  -6  18 743.518 319.874   1
  -2  -6  17-49.9958 153.740   1
  -2  -6  16 880.375 276.770   1
  -2  -6  15 975.610 328.847   1
   2   6 -15 1877.65 343.730   1
  -2  -6  14 2548.37 367.491   2
   2   6 -14 3200.98 409.283   1
  -2  -6  13 5211.55 516.508   2
  -2  -6  13 5953.98 581.243   1
   2   6 -13 5402.51 535.936   1
  -2  -6  12 1337.73 286.135   1
   2   6 -12 1379.28 257.139   1
  -2  -6  12 1608.05 286.418   2
   2   6 -11 1085.68 232.886   2
   2   6 -11 776.912 203.171   1
  -2  -6  11 534.963 220.497   1
   2   6 -10 3442.52 352.910   1
   2   6 -10 2562.90 312.286   2
   2   6  -9 6134.03 448.375   2
   2   6  -9 6362.89 433.414   1
  -2  -6   9 6133.09 450.654   1
  -2  -6   8 13824.3 632.453   1
   2   6  -8 14796.0 685.923   2
   2   6  -8 14451.4 584.403   1
   2   6  -7 53452.7 1306.50   2
  -2  -6   7 48863.9 1036.09   1
   2   6  -6 2606.18 294.230   2
  -2  -6   6 2528.56 205.201   1
   2   6  -6 3290.06 248.610   1
   2   6  -5 19074.2 794.860   2
  -2  -6   5 20148.3 551.224   1
  -2  -6   4 1084.52 114.935   5
  -2  -6   4 536.897 84.1949   1
   2   6  -4 1080.65 208.532   2
  -2  -6   3 13398.5 390.962   5
   2   6  -3 13650.2 710.333   2
  -2  -6   2 810.737 110.874   5
   2   6  -2 978.030 200.045   2
   2   6  -1 3496.10 206.740   5
  -2  -6   1 3124.32 253.387   5
   2   6  -1 3262.01 374.120   2
   2   6   0 3750.36 246.743   5
  -2  -6   0 3401.12 304.853   5
   2   6   0 4194.81 445.641   2
  -2  -6   0 3592.71 246.155   4
   2   6   1 1357.77 177.984   5
  -2  -6  -1 1190.62 191.645   5
   2   6   1 1164.28 268.273   2
  -2  -6  -1 1423.75 147.296   4
  -2  -6  -2 449.596 113.480   1
   2   6   2 699.423 147.816   5
  -2  -6  -2 718.315 88.8062   4
   2   6   2 556.569 166.167   2
   2   6   3 4490.61 409.943   5
  -2  -6  -3 4574.48 401.553   1
   2   6   3 4641.91 539.563   2
  -2  -6  -4 91.8737 99.4578   1
   2   6   4 72.2638 182.649   2
   2   6   4 147.252 103.193   5
   2   6   5 4322.13 535.796   2
   2   6   5 3612.52 420.680   5
   2   6   6 1644.61 335.442   5
  -2  -6  -7 185.099 170.785   1
   2   6   7 611.224 268.087   5
  -2  -6  -8 3499.26 667.882   1
   2   6   8 6876.25 747.677   5
  -2  -6  -9-22.8120 128.037   1
   2   6   9 394.634 278.885   5
   2   6  10 5841.51 751.841   5
   2   6  11 4168.41 683.301   5
   2   6  12 3705.03 650.180   5
   2   6  13 4620.05 750.843   5
   2   6  14 1088.16 413.154   5
   2   6  15 2279.93 614.481   5
   2   6  16 380.704 329.570   5
   2   6  17 1143.35 408.548   5
   2   6  18 154.336 327.369   5
  -2  -7  24-248.637 408.189   5
  -2  -7  23-244.518 461.833   5
  -2  -7  22 280.917 235.885   1
  -2  -7  21 184.492 228.901   1
  -2  -7  20 120.975 187.136   1
  -2  -7  19 1245.22 365.032   1
  -2  -7  18 91.9640 187.872   1
  -2  -7  17 6815.81 775.465   1
  -2  -7  16 2573.75 494.237   1
   2   7 -16 3799.34 517.963   1
  -2  -7  15 5763.95 622.943   1
   2   7 -15 3629.19 528.822   1
  -2  -7  14 3992.97 472.044   2
  -2  -7  14 3824.29 505.408   1
   2   7 -14 3399.37 477.274   1
  -2  -7  13 152.225 159.064   1
   2   7 -13 106.946 100.423   1
  -2  -7  13 181.619 149.656   2
   2   7 -12 25561.0 1182.14   1
   2   7 -12 27171.3 1072.24   2
  -2  -7  12 25979.1 1101.42   1
  -2  -7  12 28045.5 1196.28   2
   2   7 -11 7468.82 550.173   2
  -2  -7  11 6947.53 549.470   1
   2   7 -10 30104.4 1064.71   2
  -2  -7  10 27977.2 1148.64   1
   2   7  -9 11726.7 648.949   2
   2   7  -9 11614.4 569.563   1
   2   7  -8 23560.4 911.563   2
  -2  -7   8 23479.0 776.255   1
  -2  -7   7 26025.9 751.330   1
   2   7  -7 28123.2 791.475   1
   2   7  -6 22613.8 910.553   2
  -2  -7   6 24698.3 712.634   1
  -2  -7   5 78098.5 1147.20   1
   2   7  -5 81762.0 1722.02   2
  -2  -7   4 51.9004 53.7478   1
  -2  -7   4 94.4137 62.5747   5
  -2  -7   3 5264.56 294.610   1
   2   7  -3 5507.38 482.887   2
  -2  -7   3 5394.29 288.914   5
  -2  -7   2 1328.37 165.609   5
   2   7  -2 1074.39 209.001   2
   2   7  -1 5584.85 308.227   5
   2   7  -1 6192.20 516.988   2
  -2  -7   1 5472.11 363.068   5
  -2  -7   0 2288.02 284.109   5
   2   7   0 2448.76 221.531   5
   2   7   0 2959.31 413.113   2
  -2  -7  -1 368.376 86.1180   4
   2   7   1 294.844 146.081   2
  -2  -7  -1 161.773 76.4242   5
   2   7   1 131.378 89.9323   5
  -2  -7  -2 22863.9 859.967   1
  -2  -7  -2 24065.4 1113.64   5
   2   7   2 26351.0 1241.40   2
  -2  -7  -2 24962.6 547.724   4
   2   7   3 122.039 103.501   2
  -2  -7  -3 143.499 69.5843   1
   2   7   3 299.590 129.122   5
   2   7   4 18038.2 909.905   5
   2   7   4 20740.6 1198.54   2
   2   7   5 17286.5 972.361   5
   2   7   5 16499.8 1096.85   2
   2   7   6 4234.92 580.109   2
   2   7   6 4895.39 532.507   5
  -2  -7  -6 4082.53 529.867   1
  -2  -7  -7 21371.8 1221.67   1
   2   7   7 29943.8 1425.12   5
  -2  -7  -8 122.584 161.557   1
   2   7   8-106.419 235.026   5
   2   7   9 9118.60 887.251   5
   2   7  10 134.601 197.436   5
   2   7  11 2818.20 536.566   5
   2   7  12-963.910 363.519   5
   2   7  13-238.580 316.771   5
   2   7  14 496.349 186.603   5
   2   7  15-606.354 395.535   5
   2   7  16-204.047 356.277   5
   2   7  17-339.838 300.947   5
   2   7  18-843.620 426.499   5
  -2  -8  24 395.287 292.191   1
  -2  -8  24 111.923 289.537   5
  -2  -8  23-342.306 324.014   1
  -2  -8  22 944.092 416.448   1
  -2  -8  21 831.366 317.744   1
  -2  -8  20 191.503 187.018   1
  -2  -8  19 513.147 275.470   1
  -2  -8  18 5442.82 779.367   1
  -2  -8  17 26850.7 1518.23   1
   2   8 -16 144.540 177.327   1
  -2  -8  16 138.922 140.515   1
   2   8 -15 1096.40 411.815   1
  -2  -8  15 2970.18 478.152   1
  -2  -8  14 596.584 193.895   1
  -2  -8  14 597.982 220.896   2
   2   8 -14 838.213 229.243   1
   2   8 -13 13910.0 812.402   1
   2   8 -13 15804.2 882.918   2
  -2  -8  13 14332.9 928.260   1
  -2  -8  12 6694.89 569.133   1
   2   8 -12 4794.76 450.314   1
   2   8 -12 5573.96 508.748   2
  -2  -8  12 5835.06 557.693   2
  -2  -8  11 4496.75 463.357   1
   2   8 -11 5007.28 469.075   2
   2   8 -11 4731.20 421.668   1
   2   8 -10 1466.24 256.142   2
  -2  -8  10 1214.05 234.910   1
   2   8 -10 1420.70 250.838   1
  -2  -8   9 13823.2 620.073   1
   2   8  -9 14744.5 769.218   2
   2   8  -8 36009.6 966.976   1
   2   8  -8 36855.3 1212.59   2
   2   8  -7 426.791 170.034   2
  -2  -8   7 492.955 121.547   1
   2   8  -7 453.055 105.399   1
  -2  -8   6 16814.1 594.410   1
   2   8  -6 17633.8 847.252   2
   2   8  -5 2300.80 277.809   2
  -2  -8   5 2640.95 223.444   5
  -2  -8   5 1939.54 200.183   1
  -2  -8   4 184.927 67.7856   1
   2   8  -4 398.073 180.823   2
  -2  -8   4 373.989 89.2643   5
  -2  -8   3 19763.7 650.894   5
   2   8  -3 17633.8 914.351   2
   2   8  -2 8621.40 385.010   5
  -2  -8   2 7499.61 438.001   5
   2   8  -2 9229.33 657.203   2
   2   8  -1 2506.20 237.658   5
  -2  -8   1 2010.00 244.795   5
   2   8  -1 2277.31 327.657   2
   2   8   0 326.315 198.421   2
   2   8   0 137.332 71.0222   5
  -2  -8   0 217.499 145.202   5
   2   8   1 7127.89 461.279   5
  -2  -8  -1 7519.99 602.852   5
   2   8   1 8859.11 724.191   2
   2   8   2 2032.28 374.073   2
   2   8   2 2030.30 294.041   5
  -2  -8  -2 1685.73 314.581   5
  -2  -8  -2 1809.35 160.057   4
   2   8   3 2481.32 400.267   2
  -2  -8  -3 2675.63 333.553   1
   2   8   3 2815.04 347.333   5
  -2  -8  -3 2067.58 127.466   4
   2   8   4 1475.76 338.872   2
   2   8   4 2070.92 317.188   5
  -2  -8  -5 6213.25 587.197   1
   2   8   5 6504.87 606.718   5
   2   8   5 7445.68 750.997   2
   2   8   6 458.666 169.794   2
  -2  -8  -6 352.942 216.145   1
   2   8   6 180.273 146.559   5
  -2  -8  -7 1165.22 316.136   1
   2   8   7 923.821 266.250   5
   2   8   7 1371.21 341.706   2
   2   8   8 3764.36 537.568   5
   2   8   8 4373.81 639.683   2
  -2  -8  -8 3114.26 499.024   1
   2   8   9-373.269 268.522   2
   2   8   9-505.503 301.434   5
   2   8  10-113.204 276.164   5
   2   8  11-395.959 298.602   5
   2   8  12 645.607 288.407   5
   2   8  13 322.862 241.891   5
   2   8  14-898.185 383.498   5
   2   8  15-394.618 296.274   5
   2   8  16-673.963 372.210   5
   2   8  17-202.802 260.633   5
  -2  -9  25-169.746 316.075   1
  -2  -9  24-95.7408 223.575   1
  -2  -9  23 284.930 232.854   1
  -2  -9  22 38.2185 172.814   1
  -2  -9  21-135.450 239.254   1
  -2  -9  20 791.537 384.921   1
  -2  -9  19 889.690 391.356   1
  -2  -9  18 363.728 216.579   1
  -2  -9  17-89.8063 195.891   1
   2   9 -16 3627.60 496.380   1
  -2  -9  16 2138.72 516.570   1
   2   9 -15 4187.49 484.534   1
  -2  -9  15 4874.36 542.130   1
   2   9 -14 351.970 157.912   1
   2   9 -14 269.584 163.515   2
  -2  -9  14 73.0642 126.951   1
   2   9 -13-15.2496 107.132   1
   2   9 -13 133.547 143.773   2
  -2  -9  13-119.552 161.235   1
  -2  -9  13 63.6940 123.226   2
  -2  -9  12 5515.26 612.931   1
   2   9 -12 6581.21 525.249   1
  -2  -9  12 7056.98 641.725   2
   2   9 -12 7181.50 584.205   2
   2   9 -11 1830.51 292.644   2
   2   9 -11 2512.76 312.406   1
  -2  -9  11 1978.74 296.085   1
  -2  -9  10 26150.7 921.564   1
   2   9 -10 26871.2 999.065   1
   2   9 -10 25388.2 1046.49   2
   2   9  -9 221.105 140.720   2
  -2  -9   9 221.731 120.017   1
   2   9  -9 126.095 86.1228   1
   2   9  -8 119.048 65.7631   1
  -2  -9   8 366.152 111.208   1
   2   9  -8 290.523 137.314   2
  -2  -9   7 48511.8 1118.67   1
   2   9  -7 54477.5 1520.47   2
  -2  -9   6 7793.23 414.550   5
   2   9  -6 7033.30 547.311   2
   2   9  -5 34352.1 1254.83   2
  -2  -9   5 33964.4 899.519   1
   2   9  -4 50723.5 1527.65   2
  -2  -9   4 52448.7 1127.73   5
   2   9  -3 17904.9 924.871   2
  -2  -9   3 17999.3 685.877   5
   2   9  -2 19348.3 630.335   5
   2   9  -2 18564.8 976.630   2
   2   9  -1 26375.1 785.330   5
  -2  -9   1 25065.5 979.867   5
   2   9  -1 26856.0 1214.55   2
  -2  -9   1 27011.9 1303.22   2
   2   9   0 419.632 206.112   2
  -2  -9   0 191.833 125.612   5
   2   9   0 214.678 88.1863   5
   2   9   1 11805.3 618.412   5
   2   9   1 10903.5 850.967   2
  -2  -9  -1 10892.1 781.870   5
  -2  -9  -2 9023.52 752.098   5
   2   9   2 9000.62 584.624   5
   2   9   2 10421.5 844.992   2
  -2  -9  -2 9308.54 373.980   4
  -2  -9  -3 48.6919 26.1859   4
   2   9   3 83.1019 143.942   2
   2   9   3 284.544 171.333   5
  -2  -9  -3 79.8051 159.682   5
  -2  -9  -4 7113.16 596.728   1
   2   9   4 7067.05 617.398   5
   2   9   4 7233.55 756.802   2
   2   9   5 161.080 127.855   2
   2   9   5 253.329 58.3498   3
   2   9   5 449.648 202.837   5
  -2  -9  -5 113.604 100.179   1
   2   9   6 2026.71 441.077   2
  -2  -9  -6 1700.73 382.867   1
   2   9   6 2260.29 384.925   5
  -2  -9  -7 209.935 174.647   1
   2   9   7 32.1076 160.848   5
   2   9   7-31.2008 197.924   2
   2   9   8 2787.60 533.798   2
   2   9   8 3238.71 501.369   5
   2   9   9 1401.82 394.972   2
   2   9   9 989.229 292.634   5
   2   9  10 3534.23 664.278   2
   2   9  10 2988.19 533.107   5
   2   9  11 208.917 247.163   2
   2   9  11-417.911 291.589   5
   2   9  12 694.834 325.370   2
   2   9  12 347.088 192.431   5
   2   9  13-470.389 403.801   2
   2   9  13-526.446 366.385   5
   2   9  14-132.003 353.669   2
   2   9  14-47.7334 232.910   5
   2   9  15-492.783 313.815   5
   2   9  16-165.637 234.012   5
  -2 -10  25 196.089 250.338   1
  -2 -10  24 43.9576 205.137   1
  -2 -10  23 1.75574 192.024   1
  -2 -10  22 834.223 336.917   1
  -2 -10  21 261.237 225.622   1
  -2 -10  20 1007.72 366.839   1
  -2 -10  19 41.7408 182.228   1
  -2 -10  18 432.961 239.834   1
  -2 -10  17 102.230 149.793   1
   2  10 -16-54.5265 126.011   1
  -2 -10  16-167.944 194.234   1
   2  10 -15 168.775 182.475   2
   2  10 -15 157.751 85.5665   1
  -2 -10  15-207.092 188.166   1
   2  10 -14 1042.80 266.788   2
   2  10 -14 976.038 240.705   1
  -2 -10  14 742.329 235.830   1
   2  10 -13 617.053 205.196   2
  -2 -10  13 462.814 194.469   2
   2  10 -13 552.777 179.238   1
  -2 -10  13 634.645 202.192   1
  -2 -10  12 5291.89 567.857   2
  -2 -10  12 4637.18 475.607   1
   2  10 -12 5467.28 514.707   2
   2  10 -12 5350.49 487.826   1
  -2 -10  11 103.735 103.858   1
   2  10 -11 22.1644 116.183   2
  -2 -10  11 80.1403 126.842   2
   2  10 -11 121.372 96.3349   1
   2  10 -10 11314.9 659.360   1
   2  10 -10 12185.1 752.188   2
  -2 -10  10 11692.3 828.613   2
  -2 -10  10 12058.5 682.793   1
  -2 -10   9 2296.38 372.437   2
   2  10  -9 1975.45 314.651   2
   2  10  -9 1864.74 253.844   1
  -2 -10   9 2700.13 313.519   1
  -2 -10   8 6406.17 446.313   1
   2  10  -8 8608.67 621.335   2
  -2 -10   7 870.489 158.476   5
   2  10  -7 722.736 185.012   2
  -2 -10   7 645.854 142.329   1
  -2 -10   6 492.539 127.247   5
   2  10  -6 179.351 130.591   2
  -2 -10   6 688.587 142.842   1
   2  10  -5 1054.71 275.466   2
  -2 -10   5 748.363 226.646   2
  -2 -10   5 695.376 147.028   5
  -2 -10   5 654.489 144.921   1
  -2 -10   4 37.7978 74.1747   1
  -2 -10   4 135.856 135.250   2
  -2 -10   4-126.567 103.223   5
   2  10  -4 127.307 153.506   2
  -2 -10   3 1620.57 321.588   2
   2  10  -3 1757.66 313.917   2
  -2 -10   3 2079.81 264.596   5
  -2 -10   2-106.107 177.023   2
   2  10  -2 146.829 94.2692   5
   2  10  -2 53.1436 105.450   2
  -2 -10   2-107.365 112.256   5
  -2 -10   1-123.352 156.463   2
  -2 -10   1-213.656 146.423   5
   2  10  -1-143.977 197.874   2
   2  10  -1 88.7873 85.5508   5
  -2 -10   0 800.899 222.638   5
   2  10   0 788.152 172.900   5
   2  10   0 375.962 171.456   2
   2  10   1 619.904 267.442   2
   2  10   1 465.835 144.510   5
  -2 -10  -1 300.370 131.438   5
   2  10   2-11.4556 107.836   5
   2  10   2-189.944 155.753   2
   2  10   3 911.279 301.059   2
   2  10   3 877.002 199.267   5
  -2 -10  -3 1110.06 109.291   4
  -2 -10  -4-31.6573 108.505   1
   2  10   4 165.157 178.115   5
   2  10   4 142.921 224.068   2
   2  10   5 156.632 168.113   2
   2  10   5 276.483 207.745   5
  -2 -10  -5 45.7598 128.205   1
   2  10   6 10718.9 363.016   3
  -2 -10  -6 10537.5 863.709   1
   2  10   6 12425.6 899.918   5
   2  10   7 10.0983 164.970   2
   2  10   7 205.425 201.611   5
   2  10   8 90.7193 181.409   2
   2  10   8 49.1159 178.752   5
   2  10   9 689.057 339.337   2
   2  10   9 537.794 274.072   5
   2  10  10 4148.83 734.895   2
   2  10  10 3311.53 582.442   5
   2  10  11 91.8733 282.016   2
   2  10  11 604.535 282.701   5
   2  10  12 643.047 276.080   5
   2  10  12 329.873 233.958   2
   2  10  13-607.595 441.386   2
   2  10  13-353.814 256.559   5
   2  10  14 483.202 384.136   2
   2  10  14 270.147 229.645   5
   2  10  15 305.177 277.008   5
   2  10  16 2.29761 208.756   5
  -2 -11  25 60.8497 215.902   1
  -2 -11  24-73.6395 197.350   1
  -2 -11  23-91.2408 187.378   1
  -2 -11  22 255.540 251.342   1
  -2 -11  21 318.051 261.604   1
  -2 -11  20 4059.90 622.261   1
  -2 -11  19 286.917 234.876   1
  -2 -11  18 472.325 247.676   1
  -2 -11  17 6735.56 789.316   1
   2  11 -16 687.197 207.818   1
  -2 -11  16 429.143 187.795   1
   2  11 -15 1017.84 293.339   2
   2  11 -15 1412.30 294.886   1
  -2 -11  15 1230.23 311.997   1
   2  11 -14 21252.7 1096.28   2
   2  11 -14 21265.0 1034.17   1
  -2 -11  13 1838.40 310.300   1
   2  11 -13 1646.04 299.517   1
   2  11 -13 1683.84 312.868   2
   2  11 -12 6740.89 587.921   2
  -2 -11  12 6548.47 662.114   2
  -2 -11  12 8034.45 573.940   1
  -2 -11  11 9315.84 774.173   2
   2  11 -11 7861.68 628.788   2
   2  11 -11 8443.64 573.431   1
  -2 -11  11 8058.45 615.782   1
   2  11 -10 12452.7 780.220   2
  -2 -11  10 11567.2 851.551   2
  -2 -11  10 13958.3 753.985   1
   2  11 -10 11000.3 663.007   1
  -2 -11   9 83.7993 89.1032   2
   2  11  -9 84.5999 140.697   2
  -2 -11   9 106.225 99.1303   1
  -2 -11   8 6132.02 429.288   5
  -2 -11   8 7622.64 502.469   1
   2  11  -8 5924.93 543.699   2
  -2 -11   8 6018.14 615.912   2
   2  11  -7 722.427 197.159   2
  -2 -11   7 842.788 170.760   5
  -2 -11   7 559.528 144.051   1
  -2 -11   7 629.029 199.122   2
  -2 -11   6 898.176 255.741   2
  -2 -11   6 1055.02 190.094   1
   2  11  -6 574.885 162.480   2
  -2 -11   6 1003.12 177.837   5
   2  11  -5 3230.07 442.001   2
  -2 -11   5 3033.11 316.742   5
  -2 -11   5 3731.85 503.622   2
  -2 -11   4 2097.89 261.066   1
  -2 -11   4 2492.26 410.062   2
   2  11  -4 2443.34 391.482   2
  -2 -11   4 2424.03 320.239   5
  -2 -11   3 925.621 239.914   2
  -2 -11   3 1065.91 205.257   5
   2  11  -3 770.317 240.106   2
   2  11  -2-90.5722 186.954   2
   2  11  -2 200.850 104.964   5
  -2 -11   2 5.25774 123.695   5
  -2 -11   2-138.437 162.639   2
  -2 -11   1 2489.10 367.424   5
   2  11  -1 2924.69 304.114   5
   2  11  -1 1927.05 351.661   2
   2  11   0 25692.4 949.190   5
   2  11   0 26318.4 1365.43   2
  -2 -11   0 25537.0 1244.63   5
   2  11   1 59.5690 193.292   2
   2  11   1 16.3332 82.5017   5
   2  11   2 22191.4 997.400   5
   2  11   2 21941.9 1344.45   2
   2  11   3 8943.53 664.038   5
  -2 -11  -3 8877.67 329.453   4
  -2 -11  -3 8427.38 867.387   5
   2  11   3 9311.81 903.916   2
   2  11   4 951.169 226.857   5
  -2 -11  -4 1547.43 312.397   1
   2  11   4 1000.12 323.077   2
   2  11   5 3197.23 553.362   2
  -2 -11  -5 2708.87 451.626   1
   2  11   5 3664.73 482.475   5
   2  11   6 231.568 217.952   2
   2  11   6 316.316 197.844   5
   2  11   7 370.754 229.738   2
   2  11   7 628.103 276.592   5
   2  11   7 357.830 70.4668   3
   2  11   8 1832.45 451.443   2
   2  11   8 1024.30 365.720   5
   2  11   9 177.266 211.614   2
   2  11   9 540.697 263.079   5
   2  11  10-329.047 279.307   2
   2  11  10 756.627 318.558   5
   2  11  11 827.413 368.237   2
   2  11  11 585.070 310.018   5
   2  11  12-271.384 301.945   2
   2  11  12 588.882 281.407   5
   2  11  13 681.781 340.567   5
   2  11  13 223.674 268.416   2
   2  11  14 274.066 290.311   5
   2  11  15-177.617 224.162   5
  -2 -12  25 265.133 206.921   1
  -2 -12  24 1000.02 408.799   1
  -2 -12  23 369.304 289.217   1
  -2 -12  22 474.301 316.680   1
  -2 -12  21 716.558 313.594   1
  -2 -12  20 1565.77 442.626   1
  -2 -12  19 2813.22 513.638   1
  -2 -12  18 916.128 290.358   1
  -2 -12  17 3461.39 525.956   1
   2  12 -16 691.187 258.803   2
  -2 -12  16 434.970 251.914   1
  -2 -12  15 18705.1 1088.28   1
   2  12 -15 18889.5 1091.40   1
  -2 -12  14 1263.27 274.496   1
   2  12 -14 1330.19 309.307   2
   2  12 -14 1181.54 252.815   1
  -2 -12  13 26.4668 98.1964   1
   2  12 -13-125.303 163.634   2
   2  12 -13 55.6012 84.9471   1
  -2 -12  12 653.261 197.177   1
   2  12 -12 311.364 143.789   2
   2  12 -12 506.697 136.207   1
   2  12 -11 399.011 132.358   1
  -2 -12  11 471.202 155.835   1
  -2 -12  11 669.937 223.363   2
   2  12 -11 608.909 213.657   2
   2  12 -10 921.679 252.762   2
  -2 -12  10 885.382 249.707   2
  -2 -12  10 774.405 190.774   1
   2  12  -9 447.280 188.704   2
  -2 -12   9 432.941 197.083   2
  -2 -12   9 293.952 128.245   1
  -2 -12   8 4987.63 410.716   1
   2  12  -8 4316.21 503.681   2
  -2 -12   8 5274.56 422.015   5
  -2 -12   8 4518.84 563.684   2
  -2 -12   7 806.316 177.166   5
   2  12  -7 581.700 179.320   2
  -2 -12   7 987.823 191.999   1
  -2 -12   7 633.810 204.149   2
  -2 -12   6 1324.27 329.047   2
  -2 -12   6 1135.62 190.827   1
   2  12  -6 968.102 195.536   2
  -2 -12   6 1198.84 206.882   5
  -2 -12   5 658.140 232.059   2
  -2 -12   5 402.243 134.281   1
   2  12  -5 561.227 233.829   2
  -2 -12   5 618.523 152.897   5
  -2 -12   4 7483.84 555.815   5
  -2 -12   4 6564.27 483.959   1
   2  12  -4 7948.44 693.320   2
  -2 -12   4 7590.67 748.247   2
  -2 -12   3-206.813 189.603   2
  -2 -12   3-68.0368 101.535   5
   2  12  -3-156.267 171.201   2
  -2 -12   2 1622.04 285.392   5
  -2 -12   2 2211.78 420.441   2
   2  12  -2 1748.35 241.544   5
   2  12  -2 1558.21 327.355   2
   2  12  -1 1752.66 251.043   5
   2  12  -1 1571.56 322.922   2
   2  12   0 48.9733 81.4626   5
   2  12   0-249.362 254.893   2
   2  12   1 3632.56 410.782   5
   2  12   1 3108.56 494.562   2
   2  12   2 5472.15 507.317   5
  -2 -12  -2 6449.33 754.204   5
   2  12   2 6970.31 776.381   2
   2  12   3 387.591 230.106   2
  -2 -12  -3 114.787 47.1523   4
   2  12   3-100.436 166.575   5
  -2 -12  -3-342.991 300.363   5
  -2 -12  -4-189.630 181.427   1
   2  12   4 52.4404 179.090   2
   2  12   4-82.6848 175.991   5
   2  12   5 194.891 237.281   2
   2  12   5 278.177 141.999   5
   2  12   6 200.780 204.817   2
   2  12   6-110.803 191.018   5
   2  12   7 120.996 200.969   2
   2  12   7 932.494 317.759   5
   2  12   8 1397.60 430.429   2
   2  12   8 2075.14 456.826   5
   2  12   9 439.969 283.276   2
   2  12   9 779.126 346.317   5
   2  12  10 261.456 243.606   5
   2  12  10 367.634 338.954   2
   2  12  11-168.488 244.641   2
   2  12  11 294.735 234.729   5
   2  12  12 293.779 261.798   2
   2  12  12 352.445 311.591   5
   2  12  13 330.376 298.064   5
  -2 -13  25 197.661 246.379   1
  -2 -13  24 31.6713 164.843   1
  -2 -13  23-177.591 217.034   1
  -2 -13  22 1603.48 471.826   1
  -2 -13  21 295.546 256.043   1
  -2 -13  20 265.634 216.923   1
  -2 -13  19 245.182 190.968   1
  -2 -13  18-125.265 179.442   1
  -2 -13  17 83.9617 161.648   1
   2  13 -17 420.851 238.317   2
   2  13 -16 170.328 208.715   2
  -2 -13  16 49.8603 136.101   1
  -2 -13  15 50.0874 160.598   1
   2  13 -15-110.423 118.554   1
   2  13 -15 38.7276 119.857   2
  -2 -13  14 1819.77 320.267   1
   2  13 -14 1337.91 332.807   1
   2  13 -14 2069.52 354.642   2
   2  13 -13 277.840 139.158   1
  -2 -13  13 365.723 170.293   1
   2  13 -13 452.332 174.597   2
   2  13 -12 4217.48 484.405   2
   2  13 -12 4437.47 485.926   1
  -2 -13  12 4336.04 463.995   1
  -2 -13  11 1119.03 231.850   1
   2  13 -11 1322.15 315.531   2
  -2 -13  10 3364.18 384.074   1
  -2 -13  10 3704.49 386.677   5
   2  13 -10 3778.21 483.594   2
   2  13  -9 2683.67 403.695   2
  -2 -13   9 2264.04 307.409   1
   2  13  -8 27168.2 1246.29   2
  -2 -13   8 29156.4 1471.35   2
  -2 -13   7 9653.60 592.086   1
   2  13  -7 7902.20 676.411   2
  -2 -13   7 8154.21 783.569   2
  -2 -13   6 268.839 181.449   2
  -2 -13   6-31.6345 104.550   1
   2  13  -6-177.543 207.538   2
  -2 -13   5 26320.0 967.499   1
   2  13  -5 28484.5 1343.00   2
  -2 -13   5 28907.8 1509.35   2
  -2 -13   4 1629.37 118.074   3
  -2 -13   4 1952.09 398.233   2
   2  13  -4 2144.67 394.033   2
  -2 -13   4 2246.53 287.709   1
   2  13  -3 5544.75 630.682   2
   2  13  -2 262.268 132.566   5
   2  13  -2-156.517 216.138   2
   2  13  -1 3447.57 368.416   5
   2  13  -1 3243.02 493.862   2
   2  13   0 2033.46 325.879   5
   2  13   0 1938.77 386.387   2
  -2 -13   0 1831.17 374.579   5
  -2 -13  -1 768.754 260.430   5
   2  13   1 777.267 250.255   2
   2  13   1 768.498 214.161   5
   2  13   2 7089.40 805.091   2
   2  13   2 6736.10 586.263   5
  -2 -13  -2 6446.44 780.395   5
   2  13   3 464.199 285.138   2
  -2 -13  -3 223.297 64.1755   4
   2  13   3 112.898 124.524   5
   2  13   4 815.090 338.177   2
   2  13   4 551.145 190.553   5
   2  13   5 179.496 207.244   2
   2  13   5-19.4875 159.726   5
   2  13   6 91.8604 219.348   2
   2  13   6-208.748 212.090   5
   2  13   7 1378.51 450.168   2
   2  13   7 1429.37 331.630   5
   2  13   8 5.48226 204.904   2
   2  13   8-565.587 275.427   5
   2  13   9 344.335 348.088   2
   2  13   9 424.093 225.952   5
   2  13  10 708.827 312.346   5
   2  13  10 137.148 222.852   2
   2  13  11 481.412 320.681   5
   2  13  11-40.2833 252.604   2
   2  13  12 457.768 308.049   5
  -2 -14  25 370.793 331.790   1
  -2 -14  24 59.5509 177.586   1
  -2 -14  23 99.7823 283.898   1
  -2 -14  22 1586.54 474.834   1
  -2 -14  21 250.054 220.719   1
  -2 -14  20-113.361 189.003   1
  -2 -14  19 2990.46 558.376   1
  -2 -14  18 340.086 195.895   1
   2  14 -17 1869.82 409.265   2
  -2 -14  17 1242.27 321.416   1
  -2 -14  16 878.120 276.732   1
   2  14 -16 787.475 272.235   2
  -2 -14  15 860.608 250.908   1
   2  14 -15 969.680 270.590   2
   2  14 -15 1265.40 290.140   1
  -2 -14  14 78.0853 110.774   1
   2  14 -14 210.204 155.731   2
   2  14 -14 22.9046 104.728   1
  -2 -14  13 244.076 142.885   1
   2  14 -13-84.8698 145.522   2
  -2 -14  12 161.214 105.391   5
  -2 -14  12-88.1943 141.912   1
   2  14 -12-83.2695 140.163   2
   2  14 -11 342.631 210.700   2
  -2 -14  11 513.856 175.801   1
  -2 -14  11 480.285 156.571   5
   2  14 -10 16877.4 1018.99   2
  -2 -14  10 16742.2 863.816   5
  -2 -14  10 19159.2 910.956   1
  -2 -14   9 907.324 200.453   1
  -2 -14   9 1319.68 254.182   5
   2  14  -9 1243.78 309.076   2
  -2 -14   8 424.201 153.035   1
   2  14  -8 207.454 116.938   2
  -2 -14   7 569.912 161.484   1
   2  14  -7 217.480 134.022   2
  -2 -14   6 155.201 105.034   1
   2  14  -6-230.218 228.284   2
  -2 -14   5 455.200 159.088   1
  -2 -14   5 450.929 80.2554   3
   2  14  -5 594.646 244.839   2
  -2 -14   4 1052.64 225.530   1
   2  14  -4 1302.15 349.785   2
   2  14  -3-152.751 191.024   2
   2  14  -2 2748.00 338.802   5
   2  14  -2 2230.36 420.712   2
  -2 -14   2 1642.98 334.299   5
   2  14  -1 495.352 166.710   5
  -2 -14   1 459.309 231.608   5
   2  14  -1 81.0135 168.848   2
   2  14   0 101.134 104.893   5
  -2 -14   0-7.17378 119.709   5
   2  14   0 57.1626 156.240   2
  -2 -14  -1 376.593 151.529   5
   2  14   1 394.410 170.419   5
   2  14   1 91.9008 190.407   2
   2  14   2-91.5270 110.987   5
  -2 -14  -2-317.083 267.772   5
   2  14   2-563.252 337.696   2
   2  14   3 955.353 347.765   2
   2  14   3 652.148 222.342   5
  -2 -14  -3 194.609 183.904   5
   2  14   4 3778.60 508.385   5
   2  14   4 4042.49 663.764   2
   2  14   5 393.211 271.714   2
   2  14   5-154.009 157.665   5
   2  14   6 1973.27 522.079   2
   2  14   6 1498.90 340.313   5
   2  14   7 373.299 281.863   2
   2  14   7 65.5467 141.144   5
   2  14   8 934.506 412.655   2
   2  14   8 392.646 172.488   5
   2  14   9 245.177 314.299   2
   2  14   9-267.888 244.419   5
   2  14  10 395.457 331.720   2
   2  14  10-489.876 339.547   5
   2  14  11-639.867 303.545   5
  -2 -15  25 160.820 257.719   1
  -2 -15  24 123.975 248.845   1
  -2 -15  23 38.0546 179.578   1
  -2 -15  22 0.32463 165.811   1
  -2 -15  21 146.587 179.632   1
  -2 -15  20-114.755 195.938   1
  -2 -15  19 1200.42 428.313   1
  -2 -15  18 1408.49 421.958   1
   2  15 -18 2169.88 452.361   2
  -2 -15  17 2682.67 464.727   1
   2  15 -17 3538.13 536.780   2
   2  15 -16 1361.23 325.323   2
  -2 -15  16 1579.61 342.501   1
  -2 -15  15 1370.30 309.113   1
   2  15 -15 1518.82 342.928   2
  -2 -15  14 1699.63 336.481   1
   2  15 -14 1213.18 289.528   2
   2  15 -13 172.696 146.757   2
  -2 -15  13 377.131 168.241   1
  -2 -15  13 497.820 171.682   5
  -2 -15  12 118.121 112.059   5
  -2 -15  12-79.8543 125.655   1
   2  15 -12 57.3755 156.415   2
  -2 -15  11 8980.94 704.912   1
   2  15 -11 7187.69 695.298   2
  -2 -15  11 7595.36 624.059   5
  -2 -15  10 64.4178 106.099   1
   2  15 -10 15.5842 119.825   2
  -2 -15  10 208.094 141.051   5
  -2 -15   9 715.717 183.021   1
  -2 -15   9 626.693 192.993   5
   2  15  -9 599.413 223.879   2
   2  15  -8 7345.32 703.183   2
  -2 -15   8 6784.57 589.477   5
  -2 -15   7 7945.25 648.903   5
  -2 -15   7 9317.76 658.401   1
   2  15  -7 8526.15 751.944   2
  -2 -15   6-45.8190 114.522   1
  -2 -15   6 245.548 157.091   5
   2  15  -6-285.542 236.262   2
   2  15  -5 5212.72 634.578   2
  -2 -15   5 3679.89 409.479   1
  -2 -15   5 4401.43 521.766   5
  -2 -15   5 3813.00 209.641   3
   2  15  -4 197.311 193.146   2
  -2 -15   4-165.612 159.366   1
  -2 -15   4-120.628 166.354   5
   2  15  -3 5350.95 650.639   2
  -2 -15   3 4193.69 556.047   5
   2  15  -2 3935.85 420.401   5
  -2 -15   2 3152.35 496.583   5
   2  15  -2 3134.14 526.512   2
   2  15  -1 9.16821 96.2356   5
  -2 -15   1 38.0755 129.782   5
   2  15  -1-269.831 236.292   2
  -2 -15   0 7741.02 871.639   5
   2  15   0 7795.13 617.000   5
   2  15   0 7827.97 840.895   2
   2  15   1 359.154 183.491   5
  -2 -15  -1-33.4483 119.303   5
   2  15   1-333.890 274.806   2
   2  15   2 717.870 216.297   5
   2  15   2 400.324 177.488   2
  -2 -15  -2 444.412 182.134   5
   2  15   3 59.0228 119.634   5
   2  15   3 94.1495 203.023   2
   2  15   4 389.555 250.307   2
   2  15   4 693.813 240.938   5
   2  15   5 516.900 299.510   2
   2  15   5-45.1433 119.576   5
   2  15   6 1198.31 439.828   2
   2  15   6 877.503 285.054   5
   2  15   7-67.1040 159.574   5
   2  15   7 706.498 378.773   2
   2  15   8 70.7732 155.727   5
   2  15   8 129.951 227.538   2
   2  15   9 561.768 380.501   2
   2  15   9-105.237 239.717   5
  -2 -16  25 42.5538 242.220   1
  -2 -16  24 394.818 337.955   1
  -2 -16  23 121.004 223.305   1
  -2 -16  22 755.473 368.462   1
  -2 -16  21-67.9873 195.339   1
  -2 -16  20-127.874 207.832   1
  -2 -16  19-49.8547 159.473   1
  -2 -16  18 289.085 210.887   1
   2  16 -18 550.873 321.254   2
   2  16 -17 2914.79 464.711   2
  -2 -16  17 2724.18 461.096   1
  -2 -16  16 1516.34 331.533   1
   2  16 -16 1491.07 342.877   2
  -2 -16  15 467.041 221.092   1
   2  16 -15 485.643 217.943   2
   2  16 -14 1482.58 324.766   2
  -2 -16  14 1255.54 303.993   1
  -2 -16  13 756.434 235.586   5
   2  16 -13 548.101 198.392   2
  -2 -16  13 537.900 200.921   1
  -2 -16  12 10663.8 785.256   5
   2  16 -12 11104.9 859.484   2
  -2 -16  12 12894.7 850.842   1
  -2 -16  11 720.273 219.362   5
  -2 -16  11 421.383 188.682   1
   2  16 -11 682.072 244.158   2
  -2 -16  10 247.063 131.126   1
   2  16 -10 101.978 150.764   2
  -2 -16  10 268.840 143.435   5
   2  16  -9 1017.52 284.299   2
  -2 -16   9 837.481 220.937   5
  -2 -16   9 1091.15 237.716   1
  -2 -16   8 1260.14 269.405   5
   2  16  -8 1293.61 310.369   2
  -2 -16   8 672.465 201.567   1
  -2 -16   7 1114.91 248.215   1
  -2 -16   7 2174.94 358.878   5
   2  16  -7 2060.30 373.259   2
   2  16  -6 1091.27 282.073   2
  -2 -16   6 1244.75 144.387   3
  -2 -16   6 1172.73 235.905   1
  -2 -16   6 1207.41 284.566   5
  -2 -16   5 324.289 166.765   1
  -2 -16   5 469.309 207.149   5
   2  16  -5 455.829 209.340   2
  -2 -16   4 112.274 116.587   1
  -2 -16   4-21.6874 190.952   5
   2  16  -4 371.436 229.357   2
  -2 -16   3-108.895 221.236   5
   2  16  -3 410.687 241.144   2
   2  16  -2 507.733 193.166   5
  -2 -16   2 697.026 276.917   5
   2  16  -2 691.803 269.700   2
   2  16  -1 781.389 218.775   5
  -2 -16   1 1166.57 362.628   5
   2  16  -1 791.782 319.933   2
   2  16   0 527.899 189.121   5
  -2 -16   0 574.750 242.974   5
   2  16   0 525.208 249.080   2
   2  16   1 601.774 216.462   5
   2  16   1 327.517 207.877   2
   2  16   2-68.9340 226.877   2
   2  16   2 178.814 176.292   5
   2  16   3 209.844 165.697   5
   2  16   3-194.935 293.845   2
   2  16   4-40.9068 110.925   5
   2  16   4-239.367 308.759   2
   2  16   5 377.617 187.091   5
   2  16   5 106.963 177.322   2
   2  16   6 66.0255 199.943   2
   2  16   6-13.2852 136.900   5
   2  16   7 527.259 373.716   2
   2  16   7 32.7551 152.669   5
  -2 -17  25 169.543 291.978   1
  -2 -17  24 26.4204 187.332   1
  -2 -17  23 50.3233 196.658   1
  -2 -17  22-213.939 234.813   1
  -2 -17  21-148.391 203.957   1
  -2 -17  20 0.30598 194.134   1
  -2 -17  19 150.600 202.535   1
   2  17 -19 554.685 295.851   2
  -2 -17  18 738.674 281.260   1
   2  17 -18 984.768 308.367   2
  -2 -17  17 912.130 266.291   1
   2  17 -17 1757.72 402.850   2
  -2 -17  16 82.0523 150.052   1
   2  17 -16 204.248 181.809   2
  -2 -17  15 460.823 218.547   1
   2  17 -15-71.2608 160.031   2
   2  17 -14 4047.59 551.855   2
  -2 -17  14 3792.73 527.755   1
  -2 -17  13 291.717 140.047   1
   2  17 -13 692.574 250.037   2
   2  17 -12 2531.12 439.622   2
  -2 -17  12 1961.96 339.165   1
  -2 -17  12 2066.93 367.341   5
  -2 -17  11 2746.89 415.319   5
  -2 -17  11 2485.43 371.388   1
   2  17 -11 3010.87 488.302   2
  -2 -17  10 2471.33 358.910   1
  -2 -17  10 1899.07 341.656   5
   2  17 -10 2170.72 421.311   2
   2  17  -9 89.7439 156.813   2
  -2 -17   9-277.272 161.734   5
  -2 -17   9 96.3820 108.309   1
  -2 -17   8 144.109 106.099   5
   2  17  -8 331.728 200.296   2
  -2 -17   8 341.099 165.999   1
  -2 -17   7 2233.95 214.669   3
  -2 -17   7 2703.78 380.717   1
  -2 -17   7 2398.32 400.295   5
   2  17  -7 1985.50 383.906   2
  -2 -17   6 3558.12 447.045   1
  -2 -17   6 2889.69 195.956   3
   2  17  -6 3668.70 528.881   2
  -2 -17   6 3457.35 504.769   5
   2  17  -5 700.167 275.288   2
  -2 -17   5 767.551 227.893   1
  -2 -17   5 546.402 186.583   5
   2  17  -4 465.595 252.264   2
  -2 -17   4-98.2823 188.131   5
  -2 -17   4 154.538 128.756   1
  -2 -17   3 1197.94 328.010   5
   2  17  -3 1738.12 431.526   2
  -2 -17   2 75.8786 182.506   5
   2  17  -2 175.721 205.358   2
   2  17  -1 244.780 144.591   5
   2  17  -1-338.667 253.012   2
   2  17   0 626.079 212.739   5
   2  17   0 268.200 228.420   2
   2  17   1 58.8478 143.952   5
   2  17   1-43.9414 198.848   2
   2  17   2 1027.29 347.166   2
   2  17   2 1144.98 269.783   5
   2  17   3 25.3651 143.449   5
   2  17   3-80.9119 236.118   2
   2  17   4 178.184 167.658   5
   2  17   4-316.294 327.686   2
   2  17   5 1139.59 320.103   5
   2  17   5 562.144 334.237   2
   2  17   6-208.448 236.680   2
  -2 -18  24 160.636 232.775   1
  -2 -18  23 26.5721 172.216   1
  -2 -18  22-39.4197 173.865   1
  -2 -18  21 482.630 268.846   1
  -2 -18  20 414.896 272.253   1
  -2 -18  19 1162.63 356.594   1
   2  18 -19 1684.66 426.406   2
  -2 -18  18 390.225 210.605   1
   2  18 -18 322.596 209.471   2
  -2 -18  17 1699.13 365.048   1
   2  18 -17 1933.96 422.586   2
  -2 -18  16 722.173 275.863   1
   2  18 -16 750.791 279.463   2
   2  18 -15 235.060 184.667   2
  -2 -18  15-18.7609 123.725   1
   2  18 -14 92.4804 137.992   2
  -2 -18  14 46.2092 159.409   1
  -2 -18  13 818.438 253.608   1
   2  18 -13 672.996 218.857   2
  -2 -18  12 593.553 213.272   1
   2  18 -12 981.215 314.163   2
  -2 -18  11 106.104 107.725   1
   2  18 -11-65.7592 117.030   2
  -2 -18  10 339.502 154.079   5
  -2 -18  10 490.282 180.278   1
   2  18 -10 777.613 277.333   2
  -2 -18   9 622.026 199.412   1
  -2 -18   9 940.365 244.593   5
  -2 -18   8 10.2129 111.085   1
  -2 -18   8 249.724 193.753   5
   2  18  -7-85.7616 185.966   2
  -2 -18   7 29.0809 104.628   1
  -2 -18   7 60.7934 119.292   5
   2  18  -6 2702.70 453.566   2
  -2 -18   6 2418.29 365.300   1
  -2 -18   6 2211.21 430.595   5
  -2 -18   5 683.669 216.987   1
   2  18  -5 451.707 198.112   2
  -2 -18   5 505.168 235.300   5
  -2 -18   4-10.0266 134.842   1
   2  18  -4 469.918 276.395   2
   2  18  -3-98.5781 152.171   2
   2  18  -2 230.385 235.131   2
   2  18  -1 148.016 200.491   2
   2  18  -1 311.315 174.657   5
   2  18   0 17.1656 127.494   5
   2  18   0-300.833 248.230   2
   2  18   1 476.690 254.487   2
   2  18   1 443.597 188.710   5
   2  18   2 439.995 204.011   5
   2  18   2-47.5206 175.069   2
   2  18   3-119.635 197.903   2
   2  18   3 214.434 159.062   5
   2  18   4-54.4062 246.325   2
   2  18   5-85.3600 202.174   2
  -2 -19  24 196.541 254.194   1
  -2 -19  23-465.370 282.978   1
  -2 -19  22 100.838 183.868   1
  -2 -19  21 102.124 248.937   1
  -2 -19  20 177.434 205.807   1
  -2 -19  19 806.551 298.437   1
   2  19 -19 1154.23 374.497   2
  -2 -19  18 59.8787 124.820   1
   2  19 -18 55.8375 150.058   2
  -2 -19  17 1017.12 296.091   1
   2  19 -17 1314.54 364.263   2
  -2 -19  16 414.746 211.537   1
   2  19 -16 576.638 264.571   2
   2  19 -15 1466.62 333.917   2
  -2 -19  15 1156.31 304.652   1
   2  19 -14-236.456 208.240   2
  -2 -19  14 175.137 170.977   1
   2  19 -13 57.3833 168.981   2
  -2 -19  13 166.439 125.859   1
   2  19 -12 934.406 295.520   2
  -2 -19  12 719.373 219.740   1
   2  19 -11 509.322 252.865   2
  -2 -19  11 288.421 153.428   1
  -2 -19  10-58.2205 139.230   1
   2  19 -10 108.095 162.937   2
   2  19  -9 118.403 148.748   2
  -2 -19   9-28.8436 121.317   1
   2  19  -8 167.478 177.546   2
  -2 -19   8 268.647 155.422   1
   2  19  -7 3777.09 594.434   2
  -2 -19   7 4448.93 541.596   1
   2  19  -6-96.9787 181.268   2
  -2 -19   6-64.0714 112.525   1
  -2 -19   5 2652.60 428.387   1
   2  19  -5 2341.48 445.148   2
  -2 -19   4-72.8320 161.027   1
   2  19  -4 388.841 271.186   2
  -2 -19   3-88.0780 189.182   1
   2  19  -3 428.965 290.304   2
   2  19  -2 265.665 257.292   2
   2  19  -1 733.516 361.561   2
   2  19   0 270.363 244.665   2
   2  19   0 713.654 265.035   5
   2  19   1-128.322 236.142   2
   2  19   2 164.409 203.681   2
   2  19   3-65.3626 194.426   2
  -2 -20  24 151.749 282.855   1
  -2 -20  23 52.3076 215.321   1
  -2 -20  22 300.695 304.490   1
  -2 -20  21 141.274 184.954   1
  -2 -20  20 995.039 366.451   1
   2  20 -20 1427.09 431.270   2
  -2 -20  19 372.832 205.904   1
   2  20 -19 737.778 294.191   2
  -2 -20  18 488.715 242.658   1
   2  20 -18 839.513 326.145   2
  -2 -20  17 34.2577 130.344   1
   2  20 -17-91.5403 176.435   2
   2  20 -16-21.1011 151.805   2
  -2 -20  16 94.3944 142.238   1
  -2 -20  15 83.7251 142.732   1
   2  20 -15 258.998 184.689   2
  -2 -20  14 1255.10 327.662   1
   2  20 -14 888.698 266.730   2
   2  20 -13-170.438 152.659   2
  -2 -20  13-128.153 153.856   1
  -2 -20  12 170.320 145.786   1
   2  20 -12 444.842 236.626   2
  -2 -20  11 61.9348 115.640   1
   2  20 -11 244.444 221.318   2
  -2 -20  10 59.4724 121.731   1
   2  20 -10 313.477 227.992   2
   2  20  -9 881.172 314.771   2
  -2 -20   9 870.108 257.286   1
  -2 -20   8-66.0019 125.004   1
   2  20  -8 156.507 150.262   2
  -2 -20   7 97.9545 143.437   1
   2  20  -7-142.526 228.323   2
  -2 -20   6 40.6238 133.117   1
   2  20  -6-286.801 220.360   2
   2  20  -5-400.635 324.316   2
  -2 -20   5-32.1700 133.571   1
   2  20  -4 100.831 184.140   2
  -2 -20   4 72.3839 122.994   1
   2  20  -3 89.4011 164.291   2
  -2 -20   3-414.661 229.961   1
   2  20  -2 241.129 223.640   2
   2  20  -1 335.333 284.438   2
   2  20   0 372.739 290.281   2
   2  20   1-252.157 240.343   2
   2  20   2 116.616 186.973   2
  -2 -21  23 69.4857 254.688   1
  -2 -21  22 139.226 241.002   1
  -2 -21  21 89.4393 200.866   1
  -2 -21  20 97.6253 128.805   1
  -2 -21  19 316.991 211.596   1
  -2 -21  18 286.838 236.346   1
   2  21 -18 524.826 261.292   2
  -2 -21  17 823.584 308.266   1
   2  21 -17 623.511 272.387   2
  -2 -21  16 253.091 194.474   1
   2  21 -16 203.144 197.557   2
   2  21 -15-133.420 170.970   2
  -2 -21  15 69.1809 141.874   1
   2  21 -14 672.709 287.210   2
  -2 -21  14 694.533 247.883   1
   2  21 -13 459.957 262.534   2
  -2 -21  13 413.337 185.887   1
  -2 -21  12 884.336 256.223   1
   2  21 -12 965.491 318.846   2
  -2 -21  11-216.187 158.698   1
   2  21 -11 70.5771 139.625   2
  -2 -21  10 490.991 230.269   1
   2  21 -10 1063.14 334.673   2
  -2 -21   9-55.2271 131.306   1
   2  21  -9 75.2913 165.413   2
  -2 -21   8 363.491 204.629   1
   2  21  -8 248.271 196.961   2
  -2 -21   7 145.391 141.934   1
   2  21  -7-92.2606 181.085   2
  -2 -21   6 67.5726 130.892   1
   2  21  -6-615.040 284.890   2
  -2 -21   5 4.79239 127.660   1
   2  21  -5-304.651 235.883   2
   2  21  -4-157.935 243.563   2
  -2 -21   4 190.274 185.245   1
   2  21  -3 325.305 266.994   2
  -2 -21   3 72.0491 184.475   1
  -2 -21   2 0.30601 172.493   1
   2  21  -2 120.272 208.374   2
   2  21  -1 222.190 239.694   2
   2  21   0 271.616 265.870   2
  -2 -22  21 134.038 219.857   1
  -2 -22  20 2.23984 121.808   1
  -2 -22  19 377.429 236.438   1
  -2 -22  18 276.935 226.505   1
  -2 -22  17 966.101 335.949   1
   2  22 -17 830.466 324.421   2
  -2 -22  16 150.480 148.792   1
   2  22 -16 233.036 201.478   2
  -2 -22  15 255.031 205.844   1
   2  22 -15 96.1818 160.681   2
  -2 -22  14-7.70347 115.048   1
   2  22 -14-243.510 204.723   2
   2  22 -13-125.573 185.588   2
  -2 -22  13 240.034 163.009   1
   2  22 -12 230.477 262.442   2
  -2 -22  12-23.1582 122.746   1
   2  22 -11 194.365 208.440   2
  -2 -22  11 4.49897 116.190   1
  -2 -22  10 56.3991 133.492   1
   2  22 -10 350.026 243.491   2
  -2 -22   9 608.158 245.570   1
   2  22  -9 294.125 220.884   2
  -2 -22   8 36.2935 123.836   1
   2  22  -8-98.1859 184.783   2
   2  22  -7 285.936 202.121   2
  -2 -22   7 169.510 169.111   1
  -2 -22   6 126.998 149.597   1
   2  22  -6-96.0049 246.665   2
  -2 -22   5 161.681 172.184   1
   2  22  -5-150.990 215.855   2
   2  22  -4-1055.64 374.526   2
  -2 -22   4-90.1314 131.502   1
  -2 -22   3-101.630 171.847   1
   2  22  -3-541.242 293.286   2
  -2 -23  18 225.096 206.641   1
  -2 -23  17 264.348 189.886   1
  -2 -23  16 27.3218 148.322   1
  -2 -23  15 825.474 303.549   1
   2  23 -14 1013.74 370.207   2
  -2 -23  14 1254.61 360.164   1
  -2 -23  13 120.857 147.527   1
   2  23 -13 43.8728 141.338   2
  -2 -23  12-58.5098 122.065   1
   2  23 -12 171.777 183.153   2
  -2 -23  11 146.391 163.710   1
   2  23 -11 358.567 243.465   2
   2  23 -10 208.520 243.402   2
  -2 -23  10 148.640 184.068   1
   2  23  -9 248.929 252.441   2
   2  23  -8 222.270 227.488   2
   2  23  -7 168.694 177.579   2
   2  23  -6-119.162 225.370   2
   3 -22   5-139.473 270.454   1
   3 -22   6 130.766 204.267   1
   3 -22   7 355.374 286.691   1
   3 -22   8 150.855 205.616   1
   3 -22   9 845.179 397.962   1
   3 -22  10 405.845 264.332   1
   3 -22  11 39.7516 186.930   1
   3 -22  12 698.080 334.846   1
   3 -22  13-3.09663 225.677   1
  -3  21  -1 284.578 244.898   5
  -3  21  -2 611.533 302.751   5
   3 -21   2 88.2718 253.223   1
   3 -21   3 0.37814 173.951   1
   3 -21   4 118.153 222.652   1
   3 -21   5-275.075 272.444   1
   3 -21   6 622.374 336.882   1
   3 -21   7 1503.45 434.419   1
   3 -21   8-3.12828 196.763   1
   3 -21   9 244.959 294.019   1
   3 -21  10-148.643 195.081   1
   3 -21  11 150.802 217.365   1
   3 -21  12 431.023 288.742   1
   3 -21  13 63.0670 200.922   1
   3 -21  14 808.170 343.756   1
   3 -21  15 193.385 185.481   1
  -3  20   1-0.33219 169.169   5
  -3  20   0 318.316 241.345   5
  -3  20  -1 292.127 243.831   5
  -3  20  -2 408.939 274.303   5
   3 -20   3 55.9215 179.494   1
   3 -20   4 416.589 319.540   1
   3 -20   5 2137.43 496.825   1
   3 -20   6 18.3769 172.881   1
   3 -20   7 1228.96 372.334   1
  -3  20  -8 209.482 149.427   2
   3 -20   8 83.4081 209.128   1
   3 -20   9 875.244 350.636   1
   3 -20  10 74.9180 187.890   1
   3 -20  11 733.724 291.371   1
   3 -20  12-0.31507 189.029   1
   3 -20  13-150.046 229.269   1
   3 -20  14 553.612 320.143   1
   3 -20  15-132.131 211.372   1
   3 -20  16 1043.91 336.852   1
   3 -20  17 291.395 235.945   1
  -3  19   3 238.318 239.407   5
  -3  19   2 34.9784 161.800   5
  -3  19   1 359.347 230.205   5
  -3  19   0 233.435 193.649   5
  -3  19  -1 92.8370 189.597   5
  -3  19  -2 346.094 240.562   5
   3 -19   3 998.058 369.280   1
  -3  19  -4-1.60000 99.8906   2
   3 -19   4 3.92763 167.967   1
  -3  19  -5-2.10176 84.4767   2
   3 -19   5-190.420 161.571   1
   3 -19   6 902.246 291.016   1
  -3  19  -6 608.283 191.644   2
  -3  19  -7 181.398 129.609   2
   3 -19   7-163.822 197.111   1
  -3  19  -8 229.046 146.007   2
   3 -19   8 116.899 219.459   1
   3 -19   9-141.469 212.852   1
   3 -19  10 116.343 229.349   1
   3 -19  11 157.889 180.409   1
   3 -19  12 714.165 292.440   1
   3 -19  13 26.4294 145.839   1
   3 -19  14 655.507 279.477   1
   3 -19  15 383.210 249.630   1
   3 -19  16 38.3915 191.109   1
   3 -19  17 858.398 353.922   1
   3 -19  18-259.035 217.329   1
  -3  18   5 306.133 242.384   5
  -3  18   4 155.615 229.581   5
  -3  18   3 1502.60 432.922   5
  -3  18   2 828.273 330.518   5
  -3  18   1 222.158 206.155   5
  -3  18   0 724.798 289.971   5
  -3  18  -1 322.871 239.179   5
  -3  18  -1-28.5303 85.8792   2
  -3  18  -2 4048.03 396.185   2
  -3  18  -2 3862.71 585.652   5
  -3  18  -3 592.928 153.607   2
  -3  18  -3 1127.20 353.894   5
   3 -18   3 525.495 239.447   1
  -3  18  -4 325.727 113.594   2
   3 -18   4 711.903 333.078   1
  -3  18  -5 353.968 133.534   2
   3 -18   5 486.948 261.155   1
   3 -18   6 3200.65 518.365   1
  -3  18  -6 2522.47 326.890   2
  -3  18  -7 464.549 165.556   2
   3 -18   7 499.141 251.370   1
   3 -18   8 1379.44 369.478   1
   3 -18   9 2812.53 511.785   1
   3 -18  10 878.624 273.757   1
   3 -18  11 135.846 203.692   1
   3 -18  12 3409.75 560.500   1
   3 -18  13 152.798 217.800   1
   3 -18  14 142.331 164.366   1
   3 -18  15-391.270 268.047   1
   3 -18  16 796.225 340.326   1
   3 -18  17 492.069 282.247   1
   3 -18  18 193.836 211.158   1
   3 -18  19 234.153 235.935   1
  -3  17   6 221.176 212.074   5
   3 -17  -6 261.703 174.691   4
   3 -17  -5-152.656 179.988   4
  -3  17   5-71.5453 173.156   5
  -3  17   4 1151.07 370.532   5
  -3  17   3 81.6848 187.591   5
  -3  17   2 331.506 261.560   5
  -3  17   2-234.195 137.295   2
  -3  17   1 948.404 198.369   2
  -3  17   1 1185.50 339.848   5
  -3  17   0-73.1422 109.978   2
  -3  17   0 6.63483 186.660   5
  -3  17  -1 2144.01 442.533   5
  -3  17  -1 1746.73 257.236   2
  -3  17  -2 465.378 145.692   2
  -3  17  -2 633.752 246.635   5
  -3  17  -3 1060.26 196.519   2
   3 -17   3 428.275 317.422   1
  -3  17  -3 1257.69 327.437   5
  -3  17  -4 122.564 79.0017   2
   3 -17   4-232.424 254.699   1
  -3  17  -5 1277.01 218.072   2
   3 -17   5 1416.12 407.370   1
   3 -17   6 88.5751 93.5510   2
   3 -17   6 231.459 158.928   1
  -3  17  -6 344.389 126.484   2
   3 -17   7 123.942 105.201   2
  -3  17  -7 162.014 127.526   2
   3 -17   7 41.6508 171.079   1
   3 -17   8 806.468 226.268   2
   3 -17   8 798.008 307.663   1
   3 -17   9 780.797 316.094   1
   3 -17   9 525.681 168.301   2
   3 -17  10 1907.96 411.753   1
   3 -17  10 1094.89 256.166   2
   3 -17  11 395.156 223.707   1
   3 -17  11 34.4313 85.9740   2
   3 -17  12 186.743 187.260   1
   3 -17  12 125.926 141.013   2
   3 -17  13 1325.08 374.216   1
   3 -17  14 301.437 198.581   1
   3 -17  15 139.594 196.552   1
   3 -17  16 1293.16 353.734   1
   3 -17  17 41.4098 145.163   1
   3 -17  18 1.55995 177.359   1
   3 -17  19 227.896 216.928   1
   3 -17  20 226.411 200.260   1
  -3  16   8 106.228 196.984   5
  -3  16   7 424.465 203.336   5
   3 -16  -7 136.253 149.147   4
  -3  16   6 422.719 271.406   5
   3 -16  -6 56.9436 154.559   4
  -3  16   5 1362.89 388.098   5
  -3  16   4 371.602 225.107   5
  -3  16   4 361.273 141.779   2
  -3  16   3 312.664 264.242   5
  -3  16   3 206.268 133.262   2
  -3  16   2 1261.84 242.711   2
  -3  16   2 1645.29 424.945   5
  -3  16   1 330.584 220.705   5
  -3  16   1-194.714 143.340   2
  -3  16   0 4681.26 617.879   5
  -3  16   0 3907.43 374.050   2
  -3  16  -1 156.973 188.156   5
  -3  16  -1 5.90366 82.8648   2
  -3  16  -2 1607.62 239.306   2
  -3  16  -2 1753.06 375.615   5
  -3  16  -3 6514.39 697.158   5
  -3  16  -3 6703.18 453.276   2
  -3  16  -4 2038.12 252.551   2
   3 -16   4 2140.95 458.544   1
   3 -16   5 346.655 124.095   2
  -3  16  -5 430.624 117.679   2
   3 -16   5 527.254 264.088   1
   3 -16   6 6140.63 688.913   1
  -3  16  -6 5062.64 428.580   2
   3 -16   6 4668.00 475.492   2
   3 -16   7 1369.61 262.824   2
   3 -16   7 1455.23 335.169   1
   3 -16   8 1080.67 316.972   1
   3 -16   8 927.969 216.773   2
   3 -16   9 10817.9 736.066   2
   3 -16   9 12551.7 1016.35   1
   3 -16  10-1.89109 154.572   1
   3 -16  10 16.2932 76.2914   2
   3 -16  11 260.216 145.847   2
   3 -16  11 512.949 267.939   1
   3 -16  12 2922.06 440.675   2
   3 -16  12 2943.55 484.382   1
   3 -16  13 80.2268 177.184   1
   3 -16  13-38.7892 137.075   2
   3 -16  14 113.387 133.348   1
   3 -16  15-174.167 213.511   1
   3 -16  16 75.1819 181.682   1
   3 -16  17 345.793 240.524   1
   3 -16  18-97.0380 169.546   1
   3 -16  19 251.295 251.704   1
   3 -16  20 226.844 227.743   1
  -3  15   9 315.526 204.957   3
  -3  15   9 303.605 207.831   5
  -3  15   8 135.276 131.463   3
  -3  15   8-232.011 245.861   5
   3 -15  -8-120.416 189.456   4
  -3  15   7-3.88166 121.808   2
  -3  15   7 299.817 283.431   5
   3 -15  -7 365.206 202.530   4
  -3  15   6 402.491 242.991   5
   3 -15  -6 223.114 144.614   4
  -3  15   6 218.230 138.858   2
  -3  15   5-95.3701 159.975   5
  -3  15   5 22.4505 104.088   2
  -3  15   4 515.622 160.892   2
  -3  15   4 450.276 249.403   5
  -3  15   3-108.334 162.343   5
  -3  15   3 0.12988 93.9231   2
  -3  15   2 197.856 217.125   5
  -3  15   2 255.018 121.849   2
  -3  15   1 5627.00 433.677   2
  -3  15   1 6212.07 727.111   5
  -3  15   0 1055.99 309.115   5
  -3  15   0 1223.41 188.813   2
  -3  15  -1 4588.76 372.584   2
  -3  15  -1 4290.12 585.493   5
  -3  15  -2 1052.99 187.263   2
   3 -15   2 1283.05 290.960   3
  -3  15  -2 1313.26 324.445   5
  -3  15  -3-4.07075 62.1969   2
  -3  15  -3 65.8645 164.660   5
   3 -15   4-187.515 256.294   1
   3 -15   4-9.46393 77.6316   2
  -3  15  -4 44.4926 61.5019   2
   3 -15   5 1373.88 242.554   2
  -3  15  -5 1474.77 220.609   2
   3 -15   5 1304.23 348.858   1
   3 -15   6 36.4503 84.6796   2
   3 -15   6-184.837 211.337   1
  -3  15  -6 21.7275 98.4326   2
   3 -15   7 5637.55 662.488   1
   3 -15   7 5546.53 488.111   2
   3 -15   8 168.332 190.732   1
   3 -15   8 44.3670 77.6539   2
   3 -15   9 524.101 182.329   2
   3 -15   9 390.638 232.707   1
   3 -15  10 15.8863 81.3422   2
   3 -15  10 43.8095 155.619   1
   3 -15  11 3050.11 474.446   1
   3 -15  11 3188.94 412.720   2
   3 -15  12 5493.82 645.751   1
   3 -15  12 4206.01 488.125   2
   3 -15  13 1616.78 312.815   2
   3 -15  13 1537.38 359.581   1
   3 -15  14 1297.99 349.321   1
   3 -15  15 1927.32 423.846   1
   3 -15  16 1424.49 384.027   1
   3 -15  17 624.859 316.906   1
   3 -15  18 574.323 291.915   1
   3 -15  19 3751.05 609.298   1
   3 -15  20 70.3128 154.270   1
   3 -15  21 1022.59 427.779   1
  -3  14  11-90.9299 143.425   3
  -3  14  10 534.637 221.676   3
  -3  14  10 113.264 183.936   5
   3 -14  -9 1625.77 340.239   4
  -3  14   9 1493.36 345.113   2
  -3  14   9 1740.22 359.687   3
  -3  14   9 1266.71 369.768   5
  -3  14   8 245.058 189.525   2
  -3  14   8 216.806 167.017   3
  -3  14   8-165.860 249.264   5
   3 -14  -8-145.879 145.713   4
  -3  14   7 3956.67 508.648   3
  -3  14   7 3849.03 649.311   5
  -3  14   7 4175.16 513.974   2
   3 -14  -7 3691.12 500.302   4
  -3  14   6-120.345 162.358   5
   3 -14  -6-148.974 144.319   4
  -3  14   6-130.322 142.095   2
  -3  14   5 4782.37 671.059   5
  -3  14   5 3779.31 441.237   2
  -3  14   4 118.301 178.140   5
  -3  14   4 311.259 131.325   2
  -3  14   3 502.536 139.900   2
  -3  14   3 747.760 288.065   5
  -3  14   2 999.940 326.497   5
  -3  14   2 844.551 192.405   2
  -3  14   1 13196.8 1003.10   5
  -3  14   1 10918.6 609.450   2
  -3  14   0 1324.45 186.408   2
  -3  14   0 1596.35 347.246   5
  -3  14  -1 1747.11 224.523   2
  -3  14  -1 2418.87 427.826   5
  -3  14  -2 1078.23 283.740   5
   3 -14   2 1011.77 258.782   3
  -3  14  -2 1167.96 177.302   2
   3 -14   3 4129.08 478.433   3
  -3  14  -3 4048.80 314.201   2
  -3  14  -3 4015.24 517.211   5
   3 -14   4 6681.30 612.381   3
   3 -14   4 6913.01 495.830   2
  -3  14  -4 6195.06 400.094   2
   3 -14   4 7290.80 758.704   1
   3 -14   5 5804.93 578.107   3
  -3  14  -5 6145.47 412.809   2
   3 -14   5 6559.44 685.032   1
   3 -14   5 5410.08 439.984   2
   3 -14   6 347.524 181.898   3
   3 -14   6 587.598 230.876   1
   3 -14   6 270.378 97.7863   2
   3 -14   7 16092.3 1065.75   1
   3 -14   7 14787.4 749.321   2
   3 -14   8 408.694 192.578   1
   3 -14   8 489.795 162.726   2
   3 -14   9 800.034 200.781   2
   3 -14   9 592.724 216.140   1
   3 -14  10 5678.64 515.193   2
   3 -14  10 5392.42 627.831   1
   3 -14  11 162.383 180.520   1
   3 -14  11 165.846 79.4732   2
   3 -14  12 141.371 177.294   1
   3 -14  12-5.87747 74.8197   2
   3 -14  13 11145.0 907.267   1
   3 -14  13 9404.98 730.708   2
   3 -14  14 69.0106 175.623   1
   3 -14  15 143.653 210.349   1
   3 -14  16 2746.64 483.336   1
   3 -14  17 245.325 251.528   1
   3 -14  18 497.918 277.893   1
   3 -14  19 878.007 350.707   1
   3 -14  20 219.007 242.398   1
   3 -14  21 382.264 250.320   1
  -3  13  12-68.7843 129.636   3
  -3  13  11 618.154 268.485   3
  -3  13  11 410.455 264.776   5
  -3  13  11 335.705 198.242   2
   3 -13 -10 139.440 142.746   4
  -3  13  10 111.567 120.252   3
  -3  13  10-212.605 271.567   5
  -3  13  10 325.951 187.906   2
   3 -13  -9 487.204 198.088   4
  -3  13   9 734.036 241.475   3
  -3  13   9 843.839 253.589   2
  -3  13   9 92.7499 208.731   5
  -3  13   8 278.617 194.188   3
   3 -13  -8 164.559 130.119   4
  -3  13   8 342.199 191.268   2
  -3  13   8 176.963 180.960   5
  -3  13   7-42.3676 131.539   3
  -3  13   7-14.8651 99.1004   2
  -3  13   7-120.143 215.107   5
   3 -13  -7-44.1284 116.835   4
  -3  13   6 676.346 210.813   2
  -3  13   6 586.193 215.634   3
  -3  13   6 266.428 179.645   5
   3 -13  -6 305.632 167.440   4
  -3  13   5 158.168 155.145   3
  -3  13   5-80.0612 136.152   2
  -3  13   5-102.436 203.288   5
  -3  13   4 209.557 185.669   5
  -3  13   4-61.0881 114.548   2
  -3  13   3 210.617 171.980   5
  -3  13   3 265.286 105.233   2
  -3  13   2 1105.22 305.882   5
  -3  13   2 1101.85 192.845   2
  -3  13   1 494.730 116.316   2
  -3  13   1 368.179 216.624   5
  -3  13   0 5497.48 621.707   5
  -3  13   0 4253.48 318.388   2
  -3  13  -1-38.4363 61.7317   2
  -3  13  -1 78.1542 145.157   5
   3 -13   2 6877.29 619.985   3
  -3  13  -2 7367.23 395.448   2
  -3  13  -2 7610.49 676.329   5
   3 -13   3 807.174 225.881   3
  -3  13  -3 858.590 133.045   2
  -3  13  -3 867.039 244.094   5
   3 -13   4 1911.44 327.949   3
  -3  13  -4 2115.67 216.759   2
   3 -13   4 2012.32 253.783   2
   3 -13   4 1951.34 364.569   1
   3 -13   5 10186.5 754.013   3
   3 -13   5 11610.6 854.944   1
   3 -13   5 9949.30 560.536   2
   3 -13   6 89.6020 133.932   1
   3 -13   6 201.849 138.539   3
   3 -13   6 55.4299 74.0819   2
   3 -13   7 1903.80 373.238   1
   3 -13   7 1693.43 252.695   2
   3 -13   8-114.565 203.685   1
   3 -13   8 220.078 119.009   2
   3 -13   9 5364.08 597.135   1
   3 -13   9 6999.99 532.570   2
   3 -13  10 112.584 166.648   1
   3 -13  10 181.944 110.702   2
   3 -13  11 4510.57 550.550   1
   3 -13  11 4162.64 448.699   2
   3 -13  12 1487.45 284.391   2
   3 -13  12 1359.98 313.471   1
   3 -13  13 205.087 125.321   2
   3 -13  13 272.607 201.827   1
   3 -13  14 3720.25 548.952   1
   3 -13  15-296.720 208.636   1
   3 -13  16 367.976 232.308   1
   3 -13  17 1894.92 395.300   1
   3 -13  18 418.289 244.790   1
   3 -13  19 149.514 167.509   1
   3 -13  20 236.270 249.083   1
   3 -13  21 72.7837 216.137   1
  -3  12  14-108.599 152.053   3
  -3  12  13-11.4981 128.914   3
  -3  12  12-171.053 222.762   2
  -3  12  12 317.500 212.760   3
  -3  12  12-31.6807 295.603   5
  -3  12  11-185.267 229.462   2
  -3  12  11 228.097 139.734   3
   3 -12 -11 89.4560 113.956   4
   3 -12 -10 127.759 134.639   4
  -3  12  10-171.647 188.391   2
  -3  12  10-527.293 369.810   5
  -3  12  10-78.7200 177.352   3
  -3  12   9 758.292 243.303   2
  -3  12   9 985.369 264.197   3
   3 -12  -9 561.863 207.246   4
  -3  12   9 741.190 296.595   5
  -3  12   8-92.5362 133.728   2
  -3  12   8-225.722 192.576   3
  -3  12   8-186.669 244.645   5
   3 -12  -8-70.0716 157.099   4
  -3  12   7-29.3347 92.6678   2
  -3  12   7 111.233 161.797   3
  -3  12   7-97.9270 203.619   5
   3 -12  -7-77.8936 124.554   4
  -3  12   6 672.330 192.690   2
  -3  12   6 569.717 201.147   3
  -3  12   6 507.151 224.498   5
   3 -12  -6 455.699 199.828   4
  -3  12   5 1486.64 367.045   5
  -3  12   5 1847.93 289.766   2
  -3  12   5 1669.61 312.901   3
  -3  12   4 2012.83 342.442   3
  -3  12   4 2109.69 416.311   5
  -3  12   4 1619.51 247.809   2
  -3  12   3 6401.65 726.730   5
  -3  12   3 5919.87 435.165   2
  -3  12   2 7260.65 454.185   2
  -3  12   2 7684.11 716.371   5
  -3  12   1 32.4271 161.348   5
  -3  12   1 108.240 52.7885   2
  -3  12   0 37397.4 1525.35   5
  -3  12   0 38053.5 879.046   2
  -3  12  -1-52.4423 166.905   5
   3 -12   1 74.7831 102.011   3
  -3  12  -1 62.7727 53.0519   2
   3 -12   2 14282.3 847.376   3
  -3  12  -2 12961.4 476.431   2
  -3  12  -2 13165.4 862.911   5
   3 -12   3 3570.40 429.619   3
   3 -12   3 3074.87 294.217   2
  -3  12  -3 3229.88 248.218   2
   3 -12   3 3243.19 477.544   1
   3 -12   3 3590.11 500.449   5
  -3  12  -3 3478.28 454.255   5
   3 -12   4 6038.71 568.582   3
  -3  12  -4 6577.76 380.731   2
   3 -12   4 6684.02 684.398   5
   3 -12   4 4966.99 371.934   2
   3 -12   4 5162.90 586.094   1
   3 -12   5 2315.25 359.730   1
   3 -12   5 2395.99 382.074   5
   3 -12   5 2667.11 380.481   3
   3 -12   5 2375.55 254.753   2
   3 -12   6 17606.6 1040.56   5
   3 -12   6 18788.6 1042.87   1
   3 -12   6 19205.7 759.953   2
   3 -12   7 9135.32 544.249   2
   3 -12   7 12191.7 872.029   1
   3 -12   8-96.4073 124.089   2
   3 -12   8-139.709 147.721   1
   3 -12   9 4005.09 388.296   2
   3 -12   9 4015.60 510.989   1
   3 -12  10 554.530 210.492   1
   3 -12  10 829.465 190.449   2
   3 -12  11 242.100 134.275   1
   3 -12  11 541.631 169.039   2
   3 -12  12 280.449 140.385   2
   3 -12  12 38.9434 136.590   1
   3 -12  13 233.323 137.918   2
   3 -12  13 105.741 175.111   1
   3 -12  14 5961.06 665.342   1
   3 -12  15 687.962 268.888   1
   3 -12  16 163.417 170.232   1
   3 -12  17 1552.64 387.956   1
   3 -12  18 2641.69 497.968   1
   3 -12  19 203.572 210.069   1
   3 -12  20 190.906 185.349   1
   3 -12  21 349.019 283.654   1
   3 -12  22-281.491 333.335   1
  -3  11  16-28.7956 161.182   3
  -3  11  15-178.573 173.526   3
  -3  11  14 34.3421 170.237   3
  -3  11  13 28.2699 146.890   3
  -3  11  13 564.594 365.182   5
   3 -11 -12 413.691 179.218   4
  -3  11  12 20.8137 138.927   2
  -3  11  12 472.350 222.291   3
   3 -11 -11 390.630 177.350   4
  -3  11  11 260.525 164.108   2
  -3  11  11 347.299 188.380   3
  -3  11  11 274.271 241.232   5
  -3  11  10 539.620 206.797   2
  -3  11  10 577.077 211.651   3
   3 -11 -10 576.470 200.499   4
  -3  11   9 50.2582 116.799   3
  -3  11   9-286.065 301.685   5
  -3  11   9 141.455 148.184   2
   3 -11  -9 12.2149 103.359   4
   3 -11  -8-213.323 183.956   4
  -3  11   8-10.6532 151.004   2
  -3  11   8 74.8164 125.799   3
  -3  11   8-464.596 321.037   5
  -3  11   7 416.596 160.834   2
  -3  11   7 574.731 209.826   3
   3 -11  -7 333.261 187.975   4
  -3  11   7-21.3190 235.734   5
  -3  11   6 1117.97 302.220   5
  -3  11   6 1778.59 293.913   2
  -3  11   6 1623.97 305.749   3
   3 -11  -6 1325.97 268.046   4
  -3  11   5 497.612 156.820   2
  -3  11   5 475.414 175.891   3
  -3  11   5 316.396 167.460   5
  -3  11   4 5546.98 540.232   3
  -3  11   4 5943.09 661.475   5
  -3  11   4 5802.43 450.188   2
  -3  11   3 2403.91 267.056   2
  -3  11   3 2728.28 400.169   3
  -3  11   3 2734.96 443.068   5
  -3  11   2 387.441 101.634   2
  -3  11   2 707.637 253.173   5
  -3  11   1 799.930 124.418   2
  -3  11   1 927.890 253.837   5
   3 -11   0 61.7932 129.942   5
  -3  11   0 203.885 166.944   5
  -3  11   0-22.3106 48.2257   2
  -3  11  -1 6176.72 587.891   5
   3 -11   1 6269.68 560.843   3
  -3  11  -1 5950.87 295.646   2
   3 -11   1 6497.42 685.585   5
   3 -11   2 2461.52 348.446   3
  -3  11  -2 2264.44 181.025   2
  -3  11  -2 2024.38 333.792   5
   3 -11   2 2019.79 336.483   5
   3 -11   3 4532.29 512.518   1
   3 -11   3 4266.42 461.231   3
  -3  11  -3 5027.42 503.839   5
  -3  11  -3 4501.69 272.193   2
   3 -11   3 4721.68 548.695   5
   3 -11   3 4642.18 314.795   2
   3 -11   4 7716.15 662.371   1
   3 -11   4 6776.94 583.919   3
   3 -11   4 6548.24 638.966   5
   3 -11   5 1664.45 308.080   3
   3 -11   5 1689.92 307.825   1
   3 -11   5 1404.43 193.083   2
   3 -11   5 1804.21 326.612   5
   3 -11   6 3006.42 407.496   1
   3 -11   6 3209.26 298.412   2
   3 -11   6 3066.05 423.081   5
   3 -11   7 10105.5 751.062   5
   3 -11   7 8976.49 521.669   2
   3 -11   7 8516.25 725.807   1
   3 -11   8 799.442 238.869   5
   3 -11   8 1172.22 198.303   2
   3 -11   8 901.558 244.431   1
   3 -11   9 719.945 207.059   5
   3 -11   9 589.255 192.221   1
   3 -11   9 785.952 178.222   2
   3 -11  10 3679.21 478.259   1
   3 -11  10 5854.44 467.810   2
   3 -11  11 227.744 108.420   2
   3 -11  11 303.712 171.334   1
   3 -11  12 10013.1 839.305   1
   3 -11  12 11400.3 704.375   2
   3 -11  13 2027.47 401.084   1
   3 -11  13 1914.01 316.942   2
   3 -11  14 12131.6 929.684   1
   3 -11  15 778.185 303.334   1
   3 -11  16 1543.68 409.778   1
   3 -11  17 3545.10 545.028   1
   3 -11  18 3952.65 645.388   1
   3 -11  19 353.837 273.268   1
   3 -11  20 437.069 265.904   1
   3 -11  21 649.580 341.902   1
   3 -11  22 166.717 193.198   1
  -3  10  17 151.887 188.108   3
  -3  10  16 653.038 291.320   3
  -3  10  15-84.9842 173.942   3
  -3  10  14 284.821 155.060   3
  -3  10  14 508.914 318.529   5
  -3  10  13 597.091 224.539   3
  -3  10  13 1103.31 439.478   5
   3 -10 -12 685.953 226.255   4
  -3  10  12 474.087 207.934   3
  -3  10  12 1030.31 423.081   5
   3 -10 -11 1822.25 334.107   4
  -3  10  11 1498.53 329.094   3
  -3  10  11 1923.80 516.213   5
   3 -10 -10 1490.44 313.054   4
  -3  10  10 1454.45 326.657   3
  -3  10  10 1967.81 515.788   5
   3 -10  -9 214.076 158.539   4
  -3  10   9 155.422 151.581   3
  -3  10   9 605.768 309.691   5
  -3  10   8 1366.61 308.902   3
  -3  10   8 1199.85 278.367   2
  -3  10   8 1671.57 398.879   5
   3 -10  -8 1033.30 254.443   4
  -3  10   7 14951.9 1135.25   5
  -3  10   7 13784.0 894.970   3
  -3  10   7 14514.9 862.284   2
   3 -10  -7 15034.0 940.043   4
  -3  10   6 880.383 209.649   2
  -3  10   6 1255.83 267.065   3
  -3  10   6 878.532 247.138   5
   3 -10  -6 1108.69 251.918   4
  -3  10   5 4561.88 583.732   5
  -3  10   5 5053.53 503.480   3
  -3  10   5 4615.59 411.749   2
  -3  10   4 109.765 108.252   2
  -3  10   4 33.6889 138.797   3
  -3  10   4-89.8557 183.923   5
  -3  10   3 24860.3 1074.90   3
  -3  10   3 23504.1 1233.17   5
  -3  10   3 23668.7 760.898   2
   3 -10  -2 207.938 151.406   5
  -3  10   2 285.215 81.6723   2
  -3  10   2 381.204 221.324   5
  -3  10   1 2370.91 189.493   2
   3 -10  -1 2938.04 466.607   5
  -3  10   1 3073.44 413.018   5
  -3  10   0 4970.54 518.962   5
   3 -10   0 4899.06 484.732   3
  -3  10   0 4137.27 240.228   2
   3 -10   0 4582.56 574.938   5
   3 -10   1 266.044 126.529   3
  -3  10  -1 294.418 61.8785   2
  -3  10  -1 290.052 161.789   5
   3 -10   1 332.548 180.794   5
   3 -10   2 521.443 125.085   5
   3 -10   2 872.508 205.711   3
  -3  10  -2 883.394 105.577   2
  -3  10  -2 923.228 230.504   5
  -3  10  -3 8845.44 638.981   5
   3 -10   3 8780.12 393.075   2
   3 -10   3 9094.56 736.615   5
   3 -10   3 8766.91 633.292   3
   3 -10   3 9960.57 729.930   1
   3 -10   4 32265.1 1224.16   3
   3 -10   4 31055.4 1258.58   1
   3 -10   4 31174.6 1314.85   5
   3 -10   4 29644.9 749.638   2
   3 -10   5 4108.00 453.633   1
   3 -10   5 4720.56 503.727   5
   3 -10   5 4461.68 312.223   2
   3 -10   6 1706.20 202.881   2
   3 -10   6 1955.12 323.838   5
   3 -10   6 1616.12 297.174   1
   3 -10   7 18542.8 969.734   1
   3 -10   7 18946.1 722.514   2
   3 -10   7 20009.7 1002.39   5
   3 -10   8 274.174 113.978   2
   3 -10   8 257.338 134.924   5
   3 -10   8-23.4259 151.740   1
   3 -10   9 1996.87 320.343   5
   3 -10   9 1894.12 323.369   1
   3 -10   9 1416.69 212.239   2
  -3  10  -9 1673.28 340.509   1
   3 -10  10 11593.9 796.574   1
   3 -10  10 10911.4 623.490   2
   3 -10  11 10520.0 802.772   1
   3 -10  11 9856.93 620.605   2
   3 -10  12 257.749 124.935   2
   3 -10  12 314.843 164.142   1
   3 -10  13 328.908 142.778   2
   3 -10  13 244.449 149.058   1
   3 -10  14 2895.79 460.543   1
   3 -10  15 303.462 174.284   1
   3 -10  16 3650.13 537.887   1
   3 -10  17 299.720 196.775   1
   3 -10  18-41.2914 189.117   1
   3 -10  19 33.6404 159.793   1
   3 -10  20-10.8475 159.983   1
   3 -10  21-522.489 346.074   1
   3 -10  22-98.9496 232.410   1
  -3   9  15 1780.82 572.110   5
  -3   9  14 798.389 398.455   5
  -3   9  13 2617.33 611.216   5
   3  -9 -12 225.218 145.596   4
  -3   9  12 288.946 179.065   3
  -3   9  11 4322.19 558.303   3
  -3   9  11 4345.55 751.185   5
   3  -9 -11 4440.84 517.144   4
   3  -9 -10 20.0038 116.016   4
  -3   9  10 222.430 257.959   5
  -3   9  10 75.4456 133.487   3
  -3   9   9 3005.04 433.458   3
  -3   9   9 4111.79 656.224   5
   3  -9  -9 2962.15 421.616   4
  -3   9   8 2204.80 369.987   3
  -3   9   8 2400.64 503.762   5
   3  -9  -8 1891.28 331.812   4
  -3   9   7 867.322 245.834   3
   3  -9  -7 657.599 202.449   4
  -3   9   7 1410.68 385.904   5
  -3   9   6 295.545 151.946   3
  -3   9   6 365.724 138.475   2
  -3   9   6 64.7611 252.092   5
   3  -9  -6 313.482 135.685   4
  -3   9   5 1996.68 261.242   2
  -3   9   5 2033.29 334.481   3
  -3   9   5 2268.47 387.513   5
  -3   9   4 136.643 88.7369   2
  -3   9   4 179.851 134.411   3
  -3   9   4 157.430 133.801   5
  -3   9   3 2163.61 331.918   3
  -3   9   3 1740.04 359.987   5
   3  -9  -3 1725.41 353.430   5
  -3   9   3 2064.03 222.213   2
  -3   9   2 6476.92 534.839   3
  -3   9   2 6331.60 599.645   5
  -3   9   2 6294.09 307.692   2
   3  -9  -2 6529.87 688.268   5
   3  -9  -1 2106.79 384.090   5
  -3   9   1 2159.12 149.342   2
  -3   9   1 2137.59 353.465   5
  -3   9   0 4110.60 463.387   5
   3  -9   0 3867.73 418.973   3
  -3   9   0 3555.26 167.474   2
   3  -9   1 1781.42 282.999   3
  -3   9  -1 1843.72 119.324   2
  -3   9  -1 2021.40 306.008   5
   3  -9   2 968.947 210.058   3
  -3   9  -2 1059.73 225.122   5
   3  -9   2 766.112 99.7731   2
   3  -9   3 835.831 207.965   3
  -3   9  -3 973.124 253.039   5
   3  -9   3 791.419 234.101   1
   3  -9   3 664.587 101.674   2
   3  -9   4 15531.6 521.225   2
   3  -9   4 16571.7 880.127   3
   3  -9   5 11069.5 721.402   1
   3  -9   5 11215.4 468.475   2
   3  -9   6 2763.73 260.031   2
   3  -9   6 2553.38 355.491   5
   3  -9   6 3636.18 448.824   1
   3  -9   7 32955.8 903.037   2
   3  -9   7 34663.5 1266.23   5
   3  -9   8 117.442 130.381   1
   3  -9   8 375.603 102.205   2
   3  -9   8 220.963 135.778   5
  -3   9  -8 311.265 162.897   1
   3  -9   9 1488.32 298.841   1
   3  -9   9 1325.20 214.457   2
  -3   9  -9 1242.22 296.105   1
  -3   9 -10 1043.30 264.215   1
   3  -9  10 1307.42 220.810   2
   3  -9  10 1211.19 261.185   1
  -3   9 -11 5434.73 589.708   1
   3  -9  11 6472.50 497.730   2
   3  -9  12 1564.54 265.033   2
   3  -9  12 2287.17 372.122   1
   3  -9  13 164.571 119.677   2
   3  -9  13-9.03020 128.686   1
   3  -9  14 3917.44 488.259   1
   3  -9  15 462.407 197.474   1
   3  -9  16 109.776 198.305   1
   3  -9  17 131.806 212.556   1
   3  -9  18 17.1875 150.618   1
   3  -9  19 2207.68 520.422   1
   3  -9  20-102.546 244.110   1
   3  -9  21 1404.37 466.346   1
   3  -9  22 181.560 234.749   1
  -3   8  16-79.4132 275.349   5
  -3   8  15-97.7311 254.657   5
  -3   8  14-305.764 268.634   5
  -3   8  13 122.535 205.336   5
   3  -8 -12 296.875 166.098   4
  -3   8  12-30.7030 258.462   5
   3  -8 -11 1396.45 291.777   4
  -3   8  11 1491.93 446.108   5
   3  -8 -10 840.480 232.711   4
  -3   8  10 956.093 378.842   5
  -3   8   9 4567.43 686.719   5
  -3   8   9 3972.77 500.592   3
   3  -8  -9 3679.30 455.006   4
  -3   8   8 476.240 196.187   3
   3  -8  -8 321.328 119.899   4
  -3   8   7 13898.9 842.817   3
  -3   8   7 15830.9 1114.89   5
   3  -8  -7 16156.3 932.777   4
  -3   8   6 4750.57 494.811   3
  -3   8   6 5341.55 623.464   5
   3  -8  -6 5196.93 519.646   4
  -3   8   5 8327.56 642.921   3
  -3   8   5 7787.26 704.202   5
   3  -8  -5 8784.92 900.315   5
   3  -8  -4 20182.6 1288.52   5
  -3   8   4 21649.7 1136.77   5
  -3   8   4 20164.0 952.874   3
  -3   8   3 13420.3 865.154   5
  -3   8   3 13044.9 742.159   3
   3  -8  -3 13115.1 1072.16   5
  -3   8   3 11610.0 450.009   2
  -3   8   2 30173.8 1250.80   5
  -3   8   2 32398.1 1145.70   3
  -3   8   1 7464.05 589.192   5
  -3   8   0 25507.9 1045.96   5
  -3   8  -1 2521.38 326.080   5
  -3   8  -2 47071.9 1337.96   5
   3  -8   2 38051.4 584.356   2
   3  -8   3 6624.83 279.475   2
   3  -8   3 7520.21 582.219   1
   3  -8   4 38660.6 748.725   2
   3  -8   4 45544.9 1371.47   1
   3  -8   5 5364.92 477.378   1
   3  -8   5 6101.63 514.618   5
   3  -8   5 5596.69 317.564   2
   3  -8   6 752.884 193.655   5
   3  -8   6 846.151 133.199   2
   3  -8   6 795.104 186.118   1
   3  -8   7 8236.69 439.557   2
   3  -8   7 8511.76 608.273   5
   3  -8   7 7599.56 583.984   1
  -3   8  -7 8196.46 648.709   1
   3  -8   8 293.094 141.994   1
   3  -8   8 216.545 98.3839   2
  -3   8  -8 331.548 144.693   1
   3  -8   9 4986.78 488.776   1
  -3   8  -9 4805.88 505.354   1
   3  -8   9 4286.86 367.134   2
   3  -8  10 1668.50 245.013   2
   3  -8  10 1195.52 270.509   1
  -3   8 -10 1762.39 315.785   1
   3  -8  11 293.746 131.660   2
  -3   8 -11 179.433 125.589   1
   3  -8  11 189.588 140.634   1
   3  -8  12 12527.4 722.094   2
   3  -8  12 12432.4 843.796   1
   3  -8  13 158.293 168.774   1
   3  -8  14 2576.22 439.067   1
   3  -8  15 1201.64 352.458   1
   3  -8  16-45.5705 198.225   1
   3  -8  17 69.2206 179.224   1
   3  -8  18-18.7222 234.581   1
   3  -8  19-244.564 277.812   1
   3  -8  20 86.5021 183.175   1
   3  -8  21-54.4130 206.410   1
   3  -8  22 435.273 320.090   1
  -3   7  17 281.212 345.258   5
  -3   7  16 225.912 251.934   5
  -3   7  15 61.7533 244.578   5
  -3   7  14-188.144 242.713   5
  -3   7  13 342.267 240.656   5
   3  -7 -12 217.435 160.060   4
  -3   7  12-338.857 300.128   5
   3  -7 -11 44.9255 95.7148   4
  -3   7  11-39.8005 185.733   5
   3  -7 -10 874.595 229.922   4
  -3   7  10 1254.18 405.017   5
   3  -7  -9 1503.89 287.477   4
  -3   7   9 1783.79 429.084   5
  -3   7   8 11394.5 986.494   5
   3  -7  -8 12225.0 785.356   4
  -3   7   7 648.343 289.233   5
  -3   7   7 370.526 181.851   3
   3  -7  -7 362.292 222.658   5
   3  -7  -7 379.351 164.513   4
  -3   7   6 16675.0 872.286   3
  -3   7   6 17282.3 1094.55   5
   3  -7  -6 16118.8 904.700   4
   3  -7  -6 16929.6 1264.94   5
  -3   7   5 6108.90 525.952   3
   3  -7  -5 6393.77 748.399   5
  -3   7   5 6513.21 648.603   5
   3  -7  -4 1275.63 300.586   5
  -3   7   4 1155.29 231.246   3
  -3   7   4 1158.17 252.886   5
  -3   7   3 3401.80 379.711   3
  -3   7   3 3487.38 408.754   5
  -3   7   3 3506.02 229.660   2
  -3   7   2 1868.45 279.459   3
  -3   7   2 1614.93 299.355   5
  -3   7   2 1729.93 116.776   2
  -3   7   1 2390.95 324.940   5
  -3   7   1 2600.36 314.612   3
  -3   7   0 671.709 188.357   5
  -3   7  -1 807.611 192.220   5
  -3   7  -2 4753.32 404.806   5
   3  -7   2 4905.25 447.269   1
   3  -7   3 1563.49 243.150   1
   3  -7   3 1349.68 121.623   2
   3  -7   3 1609.22 254.692   5
   3  -7   4 10567.6 639.381   1
   3  -7   4 9679.35 363.269   2
   3  -7   4 10965.2 660.500   5
   3  -7   5 9406.92 396.142   2
   3  -7   5 9572.97 619.292   5
   3  -7   5 8685.74 580.462   1
   3  -7   6 6792.25 370.041   2
   3  -7   6 7434.73 548.597   1
   3  -7   6 6811.94 520.776   5
   3  -7   7 12409.1 550.160   2
   3  -7   7 13946.2 736.834   1
  -3   7  -7 13229.6 794.845   1
  -3   7  -8 686.829 176.884   1
   3  -7   8 512.289 168.568   1
  -3   7  -9 5230.66 521.617   1
   3  -7   9 4296.43 477.959   1
  -3   7 -10 31352.0 1390.86   1
   3  -7  10 24155.7 1128.02   1
  -3   7 -11 1642.56 323.631   1
   3  -7  11 1386.57 284.445   1
  -3   7 -12 33323.7 1571.63   1
   3  -7  12 31030.3 1369.00   1
   3  -7  13 1643.93 348.740   1
   3  -7  14 7049.04 737.102   1
   3  -7  15 153.777 175.923   1
   3  -7  16 9068.97 875.171   1
   3  -7  17 604.565 263.587   1
   3  -7  18 1480.32 447.625   1
   3  -7  19 1914.11 475.562   1
   3  -7  20 215.712 295.488   1
   3  -7  21 210.628 255.664   1
   3  -7  22 168.468 256.275   1
  -3   6  18-154.667 267.230   5
  -3   6  17 731.657 304.165   5
  -3   6  16 31.3440 269.176   5
  -3   6  15 509.825 264.094   5
  -3   6  14 6362.70 914.073   5
  -3   6  13-248.951 314.892   5
  -3   6  12 1545.46 424.735   5
   3  -6 -12 2141.28 340.428   4
   3  -6 -11 494.101 186.783   4
  -3   6  11 553.743 254.442   5
  -3   6  10 11518.6 1044.07   5
   3  -6 -10 12027.9 784.192   4
   3  -6  -9 547.469 172.860   4
  -3   6   9 672.208 283.674   5
  -3   6   8 7757.79 792.792   5
   3  -6  -8 7452.64 891.650   5
   3  -6  -8 7132.39 592.709   4
   3  -6  -7 873.973 283.522   5
  -3   6   7 1709.65 390.425   5
   3  -6  -7 1135.91 233.783   4
  -3   6   6 673.056 226.451   3
  -3   6   6 951.458 372.889   5
   3  -6  -6 694.794 303.570   5
  -3   6   5 20321.7 1103.24   5
  -3   6   5 20457.5 926.287   3
   3  -6  -5 20923.8 1281.60   5
  -3   6   4 74.9528 187.773   5
  -3   6   4 414.952 140.030   3
  -3   6   3 627.523 175.622   3
  -3   6   3 531.301 85.1097   2
  -3   6   3 397.457 153.120   5
  -3   6   2 18693.9 836.228   3
  -3   6   2 19412.0 912.091   5
   3  -6  -1 16465.6 892.731   5
  -3   6   1 14631.3 728.309   3
  -3   6   1 15280.6 763.123   5
  -3   6   0 16796.2 771.307   5
   3  -6   0 16547.2 848.552   5
  -3   6  -1 10150.1 585.250   5
   3  -6   1 11175.1 677.829   5
  -3   6  -2 10260.7 576.216   5
   3  -6   2 8923.61 241.312   2
   3  -6   2 9788.70 611.268   5
   3  -6   2 10449.0 610.426   1
   3  -6   3 18591.9 808.989   5
   3  -6   3 19043.6 821.383   1
   3  -6   3 16401.2 405.804   2
   3  -6   4 17129.1 493.139   2
   3  -6   4 17770.3 798.472   5
   3  -6   4 18430.7 813.943   1
   3  -6   5 33747.8 1081.38   5
   3  -6   5 33263.9 1088.55   1
   3  -6   6 9226.03 572.833   1
   3  -6   7 3620.69 379.976   1
   3  -6   8 18943.1 955.291   1
  -3   6  -8 22167.8 1023.47   1
  -3   6  -9 24698.0 1121.95   1
   3  -6   9 23842.4 1058.19   1
   3  -6  10 1400.07 273.638   1
  -3   6 -10 1835.75 298.671   1
  -3   6 -11 2153.00 371.833   1
   3  -6  11 2642.46 375.167   1
   3  -6  12 4402.44 507.368   1
  -3   6 -12 4998.86 563.305   1
   3  -6  13 405.785 221.733   1
   3  -6  14 10371.1 940.925   1
   3  -6  15 153.844 218.345   1
   3  -6  16 686.281 262.012   1
   3  -6  17-90.6983 215.225   1
   3  -6  18 98.2871 191.706   1
   3  -6  19 508.798 274.103   1
   3  -6  20 20.8824 186.131   1
   3  -6  21-67.6117 172.170   1
   3  -6  22 73.9150 219.109   1
  -3   5  18 427.148 297.572   5
  -3   5  17 1709.41 532.723   5
  -3   5  16 329.392 306.671   5
  -3   5  15-74.0219 323.100   5
  -3   5  14 5082.01 774.098   5
  -3   5  13 223.454 214.143   5
   3  -5 -12 84.3672 96.9931   4
  -3   5  12-313.666 374.099   5
   3  -5 -11 346.205 168.689   4
  -3   5  11-272.765 295.543   5
   3  -5 -10 348.571 138.479   4
  -3   5  10 266.575 221.330   5
   3  -5  -9 1902.18 302.586   4
  -3   5   9 1428.10 319.106   5
   3  -5  -9 1693.48 421.394   5
   3  -5  -8 567.181 172.587   4
  -3   5   8 515.725 244.538   5
   3  -5  -8 382.571 138.634   5
  -3   5   7 184.644 215.420   5
   3  -5  -7-5.06116 134.859   5
  -3   5   6 12113.1 864.796   5
   3  -5  -6 12625.9 998.273   5
  -3   5   5 2323.64 325.008   3
  -3   5   5 2443.20 211.686   2
  -3   5   5 2466.47 402.907   5
   3  -5  -5 2669.99 464.930   5
  -3   5   4 142.700 94.6851   3
  -3   5   4 177.885 55.6777   2
   3  -5  -4-54.8520 191.741   5
  -3   5   3 258.336 48.3643   2
  -3   5   3 268.469 98.0778   3
   3  -5  -3 136.917 106.529   5
  -3   5   3-2.12176 174.716   5
  -3   5   2 14981.7 731.740   3
  -3   5   2 15021.1 764.311   5
   3  -5  -2 14898.4 865.552   5
  -3   5   1 16517.4 742.573   3
  -3   5   1 16041.3 736.342   5
   3  -5  -1 17329.7 865.576   5
  -3   5   0 1134.82 199.056   5
   3  -5   0 1153.39 206.061   5
  -3   5  -1 22712.4 829.803   5
   3  -5   1 23910.0 913.826   5
   3  -5   2 24845.6 872.761   1
   3  -5   2 23625.0 883.340   5
   3  -5   3 293.178 109.212   5
   3  -5   3 240.220 96.6666   1
   3  -5   4 155.619 90.7819   5
   3  -5   4 172.928 104.044   1
   3  -5   5 8893.61 544.642   1
   3  -5   5 9296.61 541.660   5
   3  -5   6 324.947 125.171   1
   3  -5   7 8197.63 583.335   1
  -3   5  -8 3594.00 398.485   1
   3  -5   8 3686.80 406.433   1
  -3   5  -9 17218.5 893.943   1
   3  -5   9 14772.7 822.884   1
  -3   5 -10 2811.70 389.766   1
   3  -5  10 1841.77 353.740   1
   3  -5  11 6687.61 604.338   1
  -3   5 -11 4954.04 564.476   1
   3  -5  12 1770.33 357.372   1
  -3   5 -12 1073.37 288.159   1
   3  -5  13 13812.7 1010.30   1
   3  -5  14-246.664 259.278   1
   3  -5  15 2507.72 496.527   1
   3  -5  16 65.8492 134.827   1
   3  -5  17 2344.45 598.075   1
   3  -5  18 58.3871 148.603   1
   3  -5  19 4729.49 746.188   1
   3  -5  20-143.723 226.282   1
   3  -5  21 2732.98 619.276   1
  -3   4  19-223.184 404.591   5
  -3   4  18-391.606 359.805   5
  -3   4  17-562.961 448.234   5
  -3   4  16-80.1832 336.715   5
  -3   4  15 430.130 210.800   5
  -3   4  14-229.065 322.240   5
  -3   4  13 831.450 247.162   5
  -3   4  12 136.104 271.952   5
   3  -4 -11 810.979 232.476   4
  -3   4  11 533.421 260.588   5
   3  -4 -10 10252.5 814.418   1
  -3   4  10 12164.9 1020.73   5
   3  -4 -10 11974.7 760.496   4
  -3   4   9 13959.8 688.199   2
  -3   4   9 11920.8 986.561   5
   3  -4  -9 14798.0 1224.96   5
   3  -4  -9 13463.7 790.437   4
  -3   4   8 103.491 164.595   5
  -3   4   8 251.953 111.516   2
   3  -4  -8-0.86210 177.891   5
  -3   4   7 29202.7 858.484   2
  -3   4   7 26655.2 1312.13   5
   3  -4  -7 30009.2 1597.37   5
  -3   4   6 24380.7 719.029   2
  -3   4   6 27004.9 1230.76   5
   3  -4  -6 27579.3 1429.96   5
  -3   4   5 108507. 2329.79   5
   3  -4  -5 104658. 2635.55   5
  -3   4   5 99465.6 1284.92   2
  -3   4   4 22932.4 914.353   3
  -3   4   4 24810.4 542.423   2
  -3   4   4 25059.8 1068.51   5
   3  -4  -4 26007.4 1233.92   5
  -3   4   3 8075.11 564.991   5
  -3   4   3 8495.50 272.806   2
   3  -4  -3 8506.12 673.064   5
  -3   4   3 8389.48 547.347   3
  -3   4   2 26972.5 933.858   3
  -3   4   2 26258.2 957.884   5
   3  -4  -2 25741.0 1060.89   5
  -3   4   1 44013.1 1170.02   3
  -3   4   1 45039.2 1161.68   5
   3  -4  -1 45426.4 1319.26   5
  -3   4   0 37651.5 1018.28   5
   3  -4   0 37383.4 1126.00   5
  -3   4  -1 23162.8 751.747   5
   3  -4   1 22733.0 833.351   5
   3  -4   1 23633.9 838.671   1
   3  -4   1 22821.5 476.082   2
   3  -4   2 10028.5 525.847   5
   3  -4   2 10035.3 530.696   1
   3  -4   3 4156.42 354.181   5
   3  -4   3 3924.32 330.500   1
   3  -4   4 4174.02 344.511   5
   3  -4   4 4172.46 348.437   1
  -3   4  -4 4564.49 394.486   1
  -3   4  -5 6606.19 460.786   1
   3  -4   5 6256.97 431.862   1
   3  -4   6 5656.02 452.081   1
  -3   4  -6 7106.15 510.415   1
   3  -4   7 331.097 133.658   1
   3  -4   8 5988.06 507.434   1
   3  -4   9 539.424 167.591   1
  -3   4  -9 601.110 168.205   1
  -3   4 -10 10854.3 785.671   1
   3  -4  10 11538.0 764.708   1
   3  -4  11 6516.18 629.104   1
  -3   4 -11 5527.96 575.217   1
  -3   4 -12 13050.7 886.138   1
   3  -4  12 7847.36 887.037   1
   3  -4  13 154.695 176.053   1
   3  -4  14-40.6310 172.371   1
   3  -4  15-4.84546 168.616   1
   3  -4  16 390.003 242.181   1
   3  -4  17 2056.43 480.921   1
   3  -4  18 1495.03 515.195   1
   3  -4  19 179.635 289.424   1
   3  -4  20-213.320 300.215   1
   3  -4  21 93.3007 234.053   1
  -3   3  20-390.786 404.637   5
  -3   3  19-641.051 457.164   5
  -3   3  18 148.834 273.674   5
  -3   3  17 110.754 285.986   5
  -3   3  16 46.4994 322.141   5
  -3   3  15-0.38665 341.150   5
  -3   3  14 3736.63 452.044   2
  -3   3  14 3917.27 663.200   5
  -3   3  13 615.989 186.837   2
  -3   3  13 295.721 246.639   5
  -3   3  12 613.281 188.963   2
  -3   3  12 116.940 212.769   5
  -3   3  11 6024.50 728.631   5
  -3   3  11 6081.63 504.768   2
   3  -3 -11 6094.08 545.441   4
   3  -3 -11 5639.29 605.171   1
  -3   3  10 1766.15 356.426   5
   3  -3 -10 1854.01 330.494   1
   3  -3 -10 1995.12 320.878   4
   3  -3  -9 564.979 197.559   4
  -3   3   9 146.402 175.185   5
  -3   3   9 368.508 123.502   2
   3  -3  -9 280.357 154.269   1
   3  -3  -9 371.251 175.452   5
  -3   3   8 5664.95 612.089   5
  -3   3   8 6355.90 426.537   2
   3  -3  -8 5829.31 699.363   5
  -3   3   7 1690.46 209.401   2
  -3   3   7 1168.61 242.092   5
   3  -3  -7 1400.27 334.922   5
  -3   3   6 4331.04 297.868   2
  -3   3   6 3865.69 461.591   5
   3  -3  -6 4198.52 558.599   5
  -3   3   5 3750.55 425.756   5
  -3   3   5 3091.09 219.089   2
   3  -3  -5 3404.94 454.834   5
  -3   3   4 5748.10 442.184   3
  -3   3   4 5933.23 505.403   5
  -3   3   4 5941.73 281.121   2
   3  -3  -4 5717.74 479.933   4
   3  -3  -4 6045.92 574.895   5
  -3   3   3 1947.15 150.726   2
  -3   3   3 2044.91 257.590   3
  -3   3   3 1808.54 219.155   5
   3  -3  -3 1888.84 278.114   5
  -3   3   2 359.024 113.729   3
  -3   3   2 332.254 97.7611   5
   3  -3  -2 441.696 139.570   5
  -3   3   2 385.434 62.1791   2
  -3   3   1 244.683 166.475   3
  -3   3   1 190.346 116.330   5
   3  -3  -1 115.488 37.3768   2
   3  -3  -1 195.568 125.926   5
   3  -3   0 19863.3 747.709   5
  -3   3   0 20202.1 682.595   5
   3  -3   0 18223.6 425.632   2
  -3   3  -1 11499.0 498.332   5
   3  -3   1 12133.1 544.773   1
   3  -3   1 12158.5 551.023   5
   3  -3   1 12021.8 425.397   2
   3  -3   2 254.946 85.0735   1
   3  -3   2 411.183 116.992   5
   3  -3   3 3479.43 287.301   5
   3  -3   3 3432.59 294.102   1
  -3   3  -3 3582.15 318.779   1
   3  -3   4-28.1716 84.5821   1
  -3   3  -4 30.1083 63.3132   1
   3  -3   5 13148.5 640.007   1
  -3   3  -5 12545.2 661.693   1
   3  -3   6 2638.28 308.583   1
  -3   3  -6 2645.07 308.241   1
   3  -3   7 6771.81 509.878   1
   3  -3   8 7434.20 540.258   1
  -3   3  -9 21207.0 998.149   1
   3  -3   9 21465.2 1000.67   1
  -3   3 -10 10800.2 724.344   1
   3  -3  10 8137.56 772.981   1
   3  -3  11 14375.0 974.742   1
  -3   3 -11 11932.1 938.350   1
  -3   3 -12 6761.66 677.987   1
   3  -3  12 6555.39 661.256   1
   3  -3  13 245.284 139.168   1
   3  -3  14 7090.73 849.097   1
   3  -3  15-64.7550 166.364   1
   3  -3  16 5570.09 761.625   1
   3  -3  17 713.790 334.171   1
   3  -3  18 1166.80 388.541   1
   3  -3  19-28.0403 216.805   1
   3  -3  20 323.041 280.629   1
   3  -3  21-86.1462 297.121   1
  -3   2  20-449.503 399.527   5
  -3   2  19 1159.29 499.221   5
  -3   2  18 770.951 419.930   5
  -3   2  17 5187.06 875.426   5
  -3   2  16 2381.40 606.141   5
  -3   2  15 606.801 385.610   5
  -3   2  14 837.882 379.838   5
  -3   2  14 772.039 223.983   2
  -3   2  13 407.284 156.572   2
  -3   2  13 497.423 295.087   5
  -3   2  12 21279.1 977.012   2
   3  -2 -12 21595.7 1219.90   1
  -3   2  12 24010.6 1534.36   5
  -3   2  11 312.347 137.304   2
   3  -2 -11 460.738 220.083   1
  -3   2  11 626.825 264.834   5
   3  -2 -10 13121.3 894.447   1
  -3   2  10 12810.4 1008.98   5
   3  -2 -10 12265.3 750.175   4
  -3   2   9 473.983 128.543   2
   3  -2  -9 525.336 171.682   1
  -3   2   9 148.788 200.567   5
  -3   2   8 5393.11 385.479   2
  -3   2   8 4903.89 546.030   5
   3  -2  -8 4795.00 629.766   5
  -3   2   7 1302.80 178.514   2
  -3   2   7 880.994 244.473   5
   3  -2  -7 1411.07 318.675   5
  -3   2   6 2404.62 219.428   2
  -3   2   6 2295.45 340.551   5
   3  -2  -6 2621.00 425.502   5
  -3   2   5 483.647 106.533   2
  -3   2   5 424.910 153.838   5
   3  -2  -5 306.418 98.3471   4
   3  -2  -5 485.780 186.173   5
  -3   2   4 427.095 78.7449   2
   3  -2  -4 641.259 200.260   5
  -3   2   4 850.973 219.510   5
  -3   2   3 4084.87 358.604   3
   3  -2  -3 4830.65 218.926   2
  -3   2   3 5013.76 380.977   5
  -3   2   3 4545.18 248.543   2
   3  -2  -3 4473.33 409.167   5
  -3   2   2 2250.78 264.678   3
   3  -2  -2 2528.80 151.417   2
  -3   2   2 2083.01 235.082   5
   3  -2  -2 2191.45 265.455   5
  -3   2   2 2245.71 165.987   2
  -3   2   1 59461.4 1282.65   3
   3  -2  -1 60674.5 1320.42   3
  -3   2   1 60439.6 1150.04   5
   3  -2  -1 61975.9 838.027   2
   3  -2  -1 61225.9 1284.49   5
  -3   2   1 62721.5 951.429   2
   3  -2   0 7856.85 473.579   3
  -3   2   0 8633.03 410.982   5
   3  -2   0 8084.19 435.572   5
   3  -2   0 8175.42 354.618   2
   3  -2   0 9150.71 437.598   1
   3  -2   1 6492.50 370.054   1
   3  -2   1 6500.55 420.421   3
   3  -2   1 6248.06 363.524   2
   3  -2   1 6056.02 361.506   5
   3  -2   2 58678.5 1289.29   3
   3  -2   2 57581.2 1104.67   5
   3  -2   2 57551.9 1102.22   1
  -3   2  -3 31786.3 862.083   1
   3  -2   3 27356.8 790.842   1
   3  -2   4 4361.48 348.090   1
  -3   2  -4 4675.56 371.304   1
  -3   2  -5 31809.1 992.216   1
   3  -2   5 36274.3 1039.04   1
  -3   2  -6 18524.2 786.295   1
   3  -2   6 17386.0 744.102   1
   3  -2   7 28570.4 1015.82   1
   3  -2   8 191.071 150.470   1
  -3   2  -9 4217.66 465.274   1
   3  -2   9 4240.04 468.403   1
  -3   2 -10 2840.77 415.574   1
   3  -2  10 2599.08 401.122   1
  -3   2 -11 658.362 235.173   1
   3  -2  11 738.049 232.849   1
  -3   2 -12 3516.17 506.094   1
   3  -2  12 3945.15 505.080   1
   3  -2  13 128.513 172.330   1
   3  -2  14 26.0811 160.238   1
   3  -2  15 539.179 283.360   1
   3  -2  16-18.0492 160.851   1
   3  -2  17-2.34676 169.810   1
   3  -2  18 391.130 251.987   1
   3  -2  19 605.416 326.380   1
   3  -2  20-40.3108 178.846   1
   3  -2  21-52.7819 193.110   1
   3  -2  21-929.188 497.630   5
  -3   1  21 664.731 417.120   5
  -3   1  20 2118.32 646.073   5
  -3   1  19 1682.57 562.957   5
  -3   1  18 810.121 453.197   5
  -3   1  17 1313.96 553.649   5
  -3   1  16 1142.91 391.910   5
  -3   1  15 643.859 374.187   5
  -3   1  15 328.698 169.949   4
  -3   1  14 3383.26 445.607   4
  -3   1  14 3206.17 417.374   2
  -3   1  14 3544.34 658.158   5
  -3   1  13 177.007 99.6223   2
  -3   1  13 392.480 323.134   5
  -3   1  13 154.836 90.4783   4
  -3   1  12 2380.32 332.686   2
   3  -1 -12 2285.28 431.870   1
  -3   1  12 2940.62 578.515   5
  -3   1  12 2558.42 375.165   4
   3  -1 -11-18.6828 99.5882   1
  -3   1  11 275.888 256.723   5
  -3   1  11-47.3036 105.877   4
   3  -1 -10 4394.47 499.616   1
  -3   1  10 4298.07 604.880   5
   3  -1 -10 3997.40 429.830   4
  -3   1  10 4346.69 467.030   4
   3  -1  -9 5019.67 488.782   1
  -3   1   9 5124.80 402.216   2
  -3   1   9 5308.20 637.329   5
  -3   1   9 5616.08 503.852   4
  -3   1   8 14183.5 938.805   5
   3  -1  -8 12768.0 749.296   1
  -3   1   8 14626.6 632.956   2
  -3   1   8 13705.1 780.467   4
  -3   1   7 24402.8 1153.96   5
  -3   1   7 24374.9 776.076   2
   3  -1  -7 24018.8 1292.81   5
  -3   1   7 25591.7 1027.47   4
  -3   1   6 2942.68 255.574   2
  -3   1   6 2859.05 365.295   5
   3  -1  -6 2715.28 387.532   5
   3  -1  -5 422.253 92.5061   2
   3  -1  -5 342.329 136.626   5
  -3   1   5 455.639 98.7847   2
  -3   1   5 381.980 134.373   5
   3  -1  -4 13399.9 429.831   2
  -3   1   4 13674.2 675.971   5
   3  -1  -4 13131.0 741.010   5
  -3   1   4 13603.2 514.290   2
  -3   1   3 8143.89 372.481   2
  -3   1   3 8019.72 490.049   3
   3  -1  -3 8042.68 326.284   2
  -3   1   3 8288.44 482.692   5
   3  -1  -3 8341.76 541.463   5
  -3   1   2 35688.5 1006.49   3
   3  -1  -2 35758.8 718.351   2
   3  -1  -2 35249.9 1010.60   5
  -3   1   2 35767.7 880.739   5
  -3   1   2 34954.2 765.912   2
  -3   1   1 1517.10 203.672   3
   3  -1  -1 1465.58 201.328   3
  -3   1   1 1488.18 157.507   5
   3  -1  -1 1488.50 195.196   5
   3  -1  -1 1394.98 154.981   2
   3  -1  -1 1286.62 198.274   4
  -3   1   1 1481.26 164.161   2
   3  -1   0 29137.7 872.362   3
   3  -1   0 29413.1 678.972   1
  -3   1   0 28259.8 661.023   5
   3  -1   0 29658.8 748.896   5
   3  -1   0 29248.9 785.201   2
   3  -1   1 12206.8 552.794   3
   3  -1   1 11660.2 461.050   5
   3  -1   1 12094.7 446.704   1
   3  -1   1 12767.1 567.666   2
   3  -1   2 4780.01 351.236   3
   3  -1   2 4630.34 291.646   1
  -3   1  -2 4499.98 285.266   1
   3  -1   2 4232.76 274.018   5
  -3   1  -3 48832.0 1091.07   1
   3  -1   3 45813.1 1043.45   1
   3  -1   4 1851.98 226.503   1
  -3   1  -4 1847.22 220.689   1
  -3   1  -5 10422.7 545.032   1
   3  -1   5 10131.2 536.923   1
  -3   1  -6 8617.67 531.242   1
   3  -1   6 8749.14 547.651   1
  -3   1  -7 5671.15 466.208   1
   3  -1   7 5517.04 475.900   1
   3  -1   8 4887.28 467.154   1
  -3   1  -9 42.9425 121.690   1
   3  -1   9-84.1907 155.335   1
  -3   1 -10 4994.79 557.501   1
   3  -1  10 3737.91 532.360   1
   3  -1  11 7540.02 703.889   1
  -3   1 -11 8139.93 707.701   1
   3  -1  12 5711.36 642.182   1
  -3   1 -12 3458.50 534.288   1
   3  -1  13 57.5623 159.357   1
   3  -1  14 1620.87 430.819   1
   3  -1  15 141.704 205.324   1
   3  -1  16 1155.83 389.362   1
   3  -1  17 2137.71 494.767   1
   3  -1  18-187.709 253.525   1
   3  -1  19 1550.44 463.739   1
   3  -1  19 1279.77 513.174   5
   3  -1  20 124.017 240.049   5
   3  -1  21 11.3448 372.010   5
  -3   0  21 199.664 302.613   5
  -3   0  20 793.501 453.786   5
  -3   0  19 370.583 363.004   5
  -3   0  18 550.142 382.367   5
  -3   0  17 963.288 431.243   5
  -3   0  16 2576.66 624.784   5
  -3   0  15 1484.33 487.653   5
  -3   0  15 951.556 262.442   4
  -3   0  14 7533.28 625.117   2
  -3   0  14 7880.87 685.728   4
  -3   0  14 8237.96 945.727   5
  -3   0  13 1347.39 251.027   2
   3   0 -13 1377.06 310.800   1
  -3   0  13 1338.25 405.213   5
  -3   0  13 1297.32 278.816   4
  -3   0  12 17347.2 980.623   4
  -3   0  12 18373.4 889.201   2
  -3   0  12 16432.0 1252.95   5
   3   0 -11 9963.91 741.417   1
  -3   0  11 8179.59 831.366   5
  -3   0  11 7782.37 644.198   4
  -3   0  10 11858.4 772.126   4
   3   0 -10 11804.5 772.702   1
  -3   0  10 11840.3 953.386   5
  -3   0   9 3549.49 525.336   5
   3   0  -9 3213.52 400.644   1
  -3   0   9 3076.56 317.289   2
  -3   0   9 3405.87 407.997   4
   3   0  -8 46472.8 1368.15   1
  -3   0   8 47398.3 1172.01   2
  -3   0   8 46478.8 1434.26   4
  -3   0   8 48292.4 1728.25   5
   3   0  -7 106510. 1862.12   1
  -3   0   7 102619. 1633.95   2
  -3   0   7 107500. 2365.71   5
  -3   0   7 105959. 2080.28   4
   3   0  -6 6000.07 351.364   2
  -3   0   6 5902.77 375.216   2
  -3   0   6 6304.81 526.041   5
   3   0  -6 5765.83 565.774   5
  -3   0   6 5380.95 462.623   4
   3   0  -5 8126.47 382.767   2
  -3   0   5 8696.79 443.144   2
  -3   0   5 8273.40 559.887   5
   3   0  -5 7272.63 568.881   5
  -3   0   5 8409.89 546.150   4
  -3   0   4 6536.78 449.534   5
   3   0  -4 6873.74 338.624   2
   3   0  -4 7113.92 515.230   5
  -3   0   4 6594.54 382.811   2
  -3   0   3 82594.7 1496.84   3
   3   0  -3 80848.8 1183.84   2
   3   0  -3 77595.4 1545.07   5
  -3   0   3 80002.9 1331.83   5
  -3   0   3 79912.5 1292.42   2
  -3   0   2 7309.10 429.609   3
  -3   0   2 6832.07 347.356   5
   3   0  -2 6956.43 376.712   2
   3   0  -2 6516.98 409.964   5
  -3   0   2 6750.10 399.064   2
   3   0  -2 6737.27 467.509   4
   3   0  -1 10100.6 361.613   1
  -3   0   1 8540.29 450.237   3
  -3   0   1 8853.00 345.945   5
   3   0  -1 9010.98 436.438   2
   3   0  -1 9110.07 403.940   5
   3   0  -1 8710.08 507.955   4
  -3   0   1 8742.26 462.474   2
   3   0   0 19208.5 499.295   1
   3   0   0 20994.4 707.766   3
   3   0   0 23735.9 779.326   2
   3   0   0 21646.6 784.166   4
   3   0   0 22353.0 570.523   5
   3   0   1 13876.9 557.514   3
  -3   0  -1 14406.6 471.082   1
   3   0   1 13907.3 443.778   1
   3   0   1 13358.5 437.200   5
   3   0   1 13745.3 633.846   2
   3   0   2 15787.8 748.280   2
   3   0   2 15381.1 606.714   3
  -3   0  -2 16609.9 567.049   1
   3   0   2 16160.4 536.100   1
   3   0   3 2539.44 239.528   1
  -3   0  -3 3001.24 258.769   1
  -3   0  -4 2414.97 251.908   1
   3   0   4 2627.07 265.941   1
  -3   0  -5 22256.8 806.900   1
   3   0   5 23811.6 867.164   1
  -3   0  -6 18730.0 824.928   1
   3   0   6 20577.5 850.846   1
   3   0   7-9.94274 102.520   1
   3   0   8 154.483 148.292   1
  -3   0  -9 647.784 223.423   1
   3   0   9 1222.33 296.913   1
  -3   0 -10 91.5776 111.813   1
   3   0  10 127.152 187.802   1
  -3   0 -11 99.8367 104.148   1
   3   0  11-2.28186 118.128   1
   3   0  12 490.841 226.031   1
   3   0  13 28.6899 131.748   1
   3   0  14 24.6609 141.625   1
   3   0  15 875.981 333.324   1
   3   0  16-9.49316 180.779   1
   3   0  17 155.110 181.391   1
   3   0  17 498.764 206.141   5
   3   0  18-27.3022 352.653   5
   3   0  19-443.213 403.656   5
   3   0  20-999.030 486.896   5
   3   0  21-589.366 395.217   5
  -3  -1  22 1283.21 537.967   5
  -3  -1  21 0.54182 213.903   5
  -3  -1  20-86.9248 278.055   5
  -3  -1  19 274.487 268.603   5
  -3  -1  18 1387.26 479.750   5
  -3  -1  17 902.710 379.105   5
  -3  -1  16 2740.67 619.419   5
  -3  -1  15 39.2805 79.5208   4
  -3  -1  15 310.064 231.460   5
  -3  -1  14 409.490 152.525   4
  -3  -1  14 456.724 156.125   2
  -3  -1  14 434.654 301.314   5
  -3  -1  13 11425.9 741.414   2
   3   1 -13 10334.4 790.419   1
  -3  -1  13 9748.13 754.441   4
  -3  -1  13 9763.46 1009.29   5
   3   1 -12 124.854 134.460   1
  -3  -1  12-141.772 108.713   2
  -3  -1  12 44.1863 167.486   5
  -3  -1  12-222.031 155.441   4
   3   1 -11 5531.19 547.883   1
  -3  -1  11 4878.10 650.591   5
  -3  -1  11 5228.02 513.239   4
   3   1 -10 732.140 205.121   1
  -3  -1  10 769.033 268.121   5
  -3  -1  10 635.443 184.803   4
   3   1  -9 1515.34 269.214   1
  -3  -1   9 1504.73 229.700   2
  -3  -1   9 1749.35 364.212   5
  -3  -1   9 1465.76 263.793   4
   3   1  -8 3052.54 320.849   1
  -3  -1   8 3097.95 303.852   2
  -3  -1   8 2669.47 411.038   5
  -3  -1   8 2609.29 337.082   4
   3   1  -7 11810.9 523.108   2
  -3  -1   7 12114.2 773.669   5
   3   1  -7 12227.3 592.530   1
  -3  -1   7 11590.4 572.181   2
  -3  -1   7 12047.1 701.776   4
   3   1  -6 4094.67 332.598   1
   3   1  -6 4292.85 313.861   2
  -3  -1   6 4370.10 347.102   2
  -3  -1   6 4455.31 439.056   5
  -3  -1   6 4508.29 421.369   4
  -3  -1   5 12233.3 570.462   2
   3   1  -5 11982.1 496.302   2
  -3  -1   5 10641.0 615.791   5
  -3  -1   5 12457.3 659.497   4
  -3  -1   4 60.7583 59.1777   2
  -3  -1   4 279.848 111.303   5
   3   1  -4 252.726 72.9242   2
  -3  -1   4 166.488 87.6990   4
   3   1  -4 75.5823 65.3115   5
   3   1  -3 54243.9 1169.74   5
  -3  -1   3 56519.4 1199.25   3
  -3  -1   3 54824.8 1304.12   4
   3   1  -3 60722.5 1154.09   2
  -3  -1   3 56162.7 986.989   5
   3   1  -3 56241.7 1318.85   4
  -3  -1   3 54938.3 1205.96   2
  -3  -1   2 28419.3 817.438   3
   3   1  -2 27869.5 904.593   4
  -3  -1   2 30735.5 600.443   5
   3   1  -2 26737.0 698.023   5
   3   1  -2 28471.5 838.637   2
  -3  -1   2 28109.1 881.358   2
   3   1  -1 1705.74 125.455   1
  -3  -1   1 1463.76 184.086   3
  -3  -1   1 1607.34 120.843   5
   3   1  -1 1713.65 155.671   5
   3   1  -1 1436.92 207.546   4
  -3  -1   1 1378.69 196.879   2
   3   1  -1 1442.18 192.183   2
   3   1   0 49517.3 734.070   1
   3   1   0 46999.6 1205.81   2
   3   1   0 47989.9 708.327   5
   3   1   0 44140.2 1086.71   4
   3   1   1 3740.56 274.791   3
   3   1   1 3352.13 198.306   5
   3   1   1 3282.47 220.110   1
   3   1   1 3629.49 300.360   4
   3   1   1 3506.26 348.073   2
  -3  -1  -1 3631.41 222.129   1
   3   1   2 14713.1 574.543   3
  -3  -1  -2 14229.5 495.631   1
   3   1   2 13998.5 499.563   1
   3   1   2 14424.6 570.492   4
   3   1   2 13689.9 747.766   2
  -3  -1  -3 10483.9 461.775   1
   3   1   3 7640.23 510.229   1
  -3  -1  -4 3087.91 293.622   1
   3   1   4 3347.91 300.580   1
   3   1   5 72575.2 1503.24   1
  -3  -1  -5 79927.2 1641.81   1
   3   1   6 211.493 123.791   1
  -3  -1  -6 136.271 103.067   1
   3   1   7 9198.36 636.806   1
   3   1   8 5998.08 583.865   1
   3   1   9 19753.3 1007.22   1
  -3  -1  -9 19319.2 992.171   1
  -3  -1 -10 2609.32 398.313   1
   3   1  10 2264.51 376.774   1
   3   1  11 6622.97 685.995   1
  -3  -1 -11 8148.51 722.407   1
   3   1  12 9804.97 854.562   1
   3   1  13-21.7410 164.083   1
   3   1  14 1056.07 320.363   1
   3   1  14 713.767 310.390   5
   3   1  15 4.78834 174.160   1
   3   1  15-353.264 357.992   5
   3   1  16-491.004 398.316   5
   3   1  17-157.779 353.810   5
   3   1  18 169.101 204.832   5
   3   1  19 249.415 283.303   5
   3   1  20-643.972 401.462   5
  -3  -2  22-158.157 262.337   5
  -3  -2  21 1542.94 609.175   5
  -3  -2  20 4.69678 240.150   5
  -3  -2  19 6797.00 1033.31   5
  -3  -2  18-86.4745 288.259   5
  -3  -2  17 2324.58 610.255   5
  -3  -2  16-39.9282 234.915   5
  -3  -2  15 5876.87 619.677   4
  -3  -2  15 6469.51 861.115   5
  -3  -2  14 96.4338 80.3551   2
  -3  -2  14 311.181 236.219   5
   3   2 -14 13.9291 112.360   1
  -3  -2  14 130.945 101.010   4
  -3  -2  13 51.4185 79.3659   2
  -3  -2  13 7.45491 122.604   4
   3   2 -13 6.38004 94.6132   1
  -3  -2  13-195.022 223.820   5
  -3  -2  12 294.793 130.753   4
  -3  -2  12 389.039 130.685   2
   3   2 -12 703.615 204.180   1
  -3  -2  12 326.085 203.278   5
  -3  -2  11 818.418 209.673   4
  -3  -2  11 632.092 230.400   5
  -3  -2  11 843.094 193.094   2
   3   2 -11 546.510 207.170   1
  -3  -2  10 7052.68 706.923   5
   3   2 -10 6375.93 524.574   1
  -3  -2  10 6778.74 579.490   4
  -3  -2   9 1628.21 280.267   4
  -3  -2   9 1987.96 273.993   2
  -3  -2   9 1316.27 314.354   5
  -3  -2   8 26.6707 58.4436   4
   3   2  -8 35.5671 83.2284   2
  -3  -2   8-70.6738 76.7776   2
   3   2  -8 37.0543 74.1104   1
  -3  -2   8-193.828 175.686   5
  -3  -2   7 27742.3 934.138   2
   3   2  -7 26955.8 817.216   2
   3   2  -7 23934.4 809.083   1
  -3  -2   7 26687.9 1040.28   4
  -3  -2   7 27704.5 1153.62   5
  -3  -2   6 9980.75 550.288   2
   3   2  -6 10174.8 491.094   2
   3   2  -6 10122.1 489.002   1
  -3  -2   6 9868.71 615.260   5
  -3  -2   6 9274.82 597.832   4
   3   2  -5 18402.4 564.242   1
   3   2  -5 20798.4 725.177   2
  -3  -2   5 19721.1 770.127   2
  -3  -2   5 20159.8 778.391   5
  -3  -2   5 20470.6 850.560   4
   3   2  -4 20066.2 495.550   1
   3   2  -4 19338.4 692.558   2
  -3  -2   4 19470.0 658.719   5
  -3  -2   4 19915.1 756.666   2
  -3  -2   4 19401.3 809.907   4
   3   2  -3 6585.32 425.265   2
  -3  -2   3 6707.51 297.747   5
  -3  -2   3 6396.99 442.048   2
  -3  -2   3 6532.25 449.279   4
   3   2  -3 6614.80 447.327   4
  -3  -2   2 15000.6 685.717   2
  -3  -2   2 16865.7 606.381   3
   3   2  -2 16233.1 681.037   2
  -3  -2   2 17594.6 355.312   5
   3   2  -2 15256.7 440.099   5
  -3  -2   2 16718.6 678.795   4
   3   2  -2 17143.3 680.689   4
  -3  -2   1 74394.3 1204.95   3
   3   2  -1 69805.9 769.156   5
   3   2  -1 74311.6 1537.19   2
   3   2  -1 71833.5 1375.58   4
  -3  -2   1 72948.4 1573.64   2
   3   2   0 745.950 135.605   4
   3   2   0 955.525 209.990   2
   3   2   0 700.145 69.4784   5
   3   2   0 771.277 128.770   3
  -3  -2   0 599.552 73.7163   1
   3   2   0 829.225 90.8818   1
   3   2   1 7296.85 373.359   3
   3   2   1 7858.29 419.713   4
   3   2   1 7583.82 317.801   1
  -3  -2  -1 8006.39 320.511   1
   3   2   1 7180.77 541.916   2
   3   2   2 3241.85 255.546   3
  -3  -2  -2 3429.83 240.475   1
   3   2   2 3353.49 258.173   1
   3   2   2 3269.47 268.649   4
   3   2   2 3675.55 409.380   2
   3   2   3 3572.39 416.137   2
   3   2   3 4534.71 337.357   1
  -3  -2  -3 4545.04 335.026   1
   3   2   3 4149.46 290.427   4
   3   2   4 10582.2 575.008   1
   3   2   4 12203.7 468.871   4
  -3  -2  -4 12567.0 586.552   1
   3   2   5 16002.9 743.921   1
  -3  -2  -5 17413.6 733.140   1
   3   2   5 16643.3 531.782   4
  -3  -2  -6 61.3568 104.495   1
   3   2   6 68.7838 92.3267   1
   3   2   7 3663.75 444.264   1
  -3  -2  -8 240.085 150.808   1
   3   2   8 113.014 127.943   1
   3   2   9 4009.02 470.167   1
  -3  -2  -9 3587.43 430.462   1
   3   2  10 2222.24 400.938   1
  -3  -2 -10 2217.21 387.196   1
  -3  -2 -11 142.679 150.877   1
   3   2  11 79.7185 149.478   1
   3   2  11-223.371 321.687   5
   3   2  12 88.6621 33.5165   4
   3   2  12-39.2283 132.058   1
   3   2  13-297.709 375.431   5
   3   2  14-221.786 291.733   5
   3   2  15 423.646 288.545   5
   3   2  16-376.853 322.357   5
   3   2  17 25.7563 301.525   5
   3   2  18-432.967 354.936   5
   3   2  19-345.299 320.917   5
   3   2  20-224.030 294.896   5
  -3  -3  23 22.1043 230.412   5
  -3  -3  22 738.943 450.703   5
  -3  -3  21 1971.52 629.939   5
  -3  -3  20-252.994 332.313   5
  -3  -3  19 1547.96 487.277   5
  -3  -3  18 2144.70 555.261   5
  -3  -3  17-159.066 324.914   5
  -3  -3  16 992.727 357.123   5
  -3  -3  15 734.938 294.035   5
   3   3 -15 849.365 240.374   1
  -3  -3  14-178.956 151.116   4
  -3  -3  14-101.662 144.639   2
  -3  -3  14-227.251 257.597   5
   3   3 -14-98.0295 143.271   1
  -3  -3  13 338.733 169.364   4
  -3  -3  13 110.233 101.361   2
  -3  -3  13 80.2541 202.429   5
   3   3 -13 413.625 212.694   1
   3   3 -12 653.592 229.294   1
  -3  -3  12 882.304 237.103   4
  -3  -3  12 1045.33 237.786   2
  -3  -3  12 898.301 299.773   5
  -3  -3  11 50.1531 86.9843   4
  -3  -3  11-53.6775 195.764   5
  -3  -3  11 154.112 114.074   2
   3   3 -11 116.987 116.465   1
  -3  -3  10 306.795 138.462   4
   3   3 -10 501.776 175.868   2
  -3  -3  10 86.5827 178.807   5
   3   3 -10 456.007 156.006   1
  -3  -3   9 355.114 152.932   4
   3   3  -9 582.670 179.140   2
   3   3  -9 485.303 167.284   1
  -3  -3   9 646.113 223.172   5
   3   3  -8 1992.11 247.026   2
  -3  -3   8 1978.45 256.312   2
   3   3  -8 2472.21 271.742   1
  -3  -3   8 1816.01 304.202   5
  -3  -3   8 2139.79 304.350   4
  -3  -3   7 401.872 124.083   4
  -3  -3   7 320.093 101.549   5
   3   3  -7 462.898 112.387   2
  -3  -3   7 424.150 110.516   2
   3   3  -7 353.430 116.235   1
   3   3  -6 1630.06 221.121   2
   3   3  -6 1435.26 178.347   1
  -3  -3   6 1575.65 242.508   2
  -3  -3   6 1506.21 234.357   5
  -3  -3   6 1463.90 246.234   4
   3   3  -5 3033.60 201.781   1
   3   3  -5 2743.38 278.598   2
  -3  -3   5 2353.89 294.970   2
  -3  -3   5 2787.03 274.606   5
  -3  -3   5 2500.46 304.747   4
   3   3  -4 102.183 102.776   4
   3   3  -4-130.317 116.719   2
  -3  -3   4-33.0143 89.2155   5
  -3  -3   4 50.2341 63.6113   2
   3   3  -4 76.3665 31.6783   1
  -3  -3   4 42.7917 64.1148   4
   3   3  -3 9913.42 549.687   2
  -3  -3   3 9221.34 274.758   5
  -3  -3   3 9396.75 564.820   2
  -3  -3   3 9268.90 539.583   4
   3   3  -3 9709.63 515.546   4
  -3  -3   2 2839.07 245.952   3
   3   3  -2 2875.17 308.727   2
  -3  -3   2 2819.02 328.191   2
  -3  -3   2 3121.90 296.584   4
   3   3  -2 2922.24 273.901   4
  -3  -3   1 20814.6 598.641   3
  -3  -3   1 19752.0 879.415   2
   3   3  -1 18438.7 822.297   2
  -3  -3   1 19954.5 724.353   4
   3   3  -1 21010.7 716.279   4
  -3  -3   0 5399.28 214.354   1
   3   3   0 6710.46 524.668   2
   3   3   0 6115.53 374.535   4
   3   3   1 5985.33 325.596   3
   3   3   1 5468.52 264.080   1
   3   3   1 5343.83 284.197   5
   3   3   1 5995.63 531.976   2
   3   3   1 5576.69 340.864   4
  -3  -3  -1 5915.16 300.082   1
   3   3   2 24972.4 658.516   3
   3   3   2 26811.6 682.670   1
  -3  -3  -2 26328.3 701.454   1
   3   3   2 25125.5 692.634   4
   3   3   2 25171.8 1113.68   2
   3   3   3 1180.57 331.065   2
   3   3   3 1018.17 175.164   1
  -3  -3  -3 642.669 156.333   1
   3   3   3 931.747 142.723   4
   3   3   4 20036.8 754.386   1
  -3  -3  -4 19145.0 724.623   1
   3   3   4 19458.8 539.850   4
   3   3   5 668.230 97.1283   4
  -3  -3  -5 542.812 171.731   1
   3   3   5 523.301 138.608   1
   3   3   6 113.619 46.2821   4
  -3  -3  -6 111.564 117.608   1
   3   3   6 22.4530 99.7660   1
   3   3   6 46.7227 148.877   5
   3   3   7 10273.9 712.594   1
   3   3   7 10800.4 853.267   5
   3   3   7 9161.67 289.495   4
  -3  -3  -8 793.920 224.542   1
   3   3   8 1029.61 273.857   5
  -3  -3  -9 377.361 159.176   1
   3   3   9 93.5374 180.659   5
  -3  -3 -10 14499.3 907.218   1
   3   3  10 14449.7 1162.31   5
   3   3  11 1176.74 330.474   5
   3   3  12 1717.80 428.250   5
   3   3  13 109.483 235.697   5
   3   3  14 2965.11 609.679   5
   3   3  15 176.175 235.382   5
   3   3  16 2578.20 637.308   5
   3   3  17 50.0304 228.401   5
   3   3  18 783.829 386.682   5
   3   3  19 664.747 448.600   5
  -3  -4  23 321.942 313.420   5
  -3  -4  22 564.005 371.122   5
  -3  -4  21 112.199 273.387   5
  -3  -4  20 4.58546 268.956   5
  -3  -4  19-323.112 328.239   5
  -3  -4  18 951.723 351.687   5
  -3  -4  17 256.871 241.863   5
  -3  -4  16 801.182 301.105   5
   3   4 -15 496.222 209.283   1
  -3  -4  15 60.6071 273.152   5
   3   4 -14 30107.9 1336.16   1
  -3  -4  14 30251.3 1393.00   4
  -3  -4  14 30435.5 1821.40   5
  -3  -4  13 1575.78 310.216   4
  -3  -4  13 1574.88 301.204   2
   3   4 -13 1595.61 295.871   1
  -3  -4  13 1322.85 360.938   5
  -3  -4  12 40573.8 1512.86   4
  -3  -4  12 41809.3 1419.68   2
   3   4 -12 43565.6 1415.00   1
  -3  -4  12 39204.3 1865.98   5
   3   4 -11 6260.04 505.886   2
  -3  -4  11 5291.38 499.090   2
   3   4 -11 6174.05 498.426   1
  -3  -4  11 5287.04 626.442   5
  -3  -4  11 5256.35 521.635   4
  -3  -4  10 39420.7 1401.52   4
   3   4 -10 38581.5 1164.21   2
  -3  -4  10 38043.2 1633.82   5
   3   4  -9 16848.1 748.273   2
   3   4  -9 19375.0 765.752   1
  -3  -4   9 16905.1 1019.57   5
  -3  -4   9 17768.2 905.640   4
   3   4  -8 7657.11 443.906   1
   3   4  -8 8722.33 522.665   2
  -3  -4   8 8690.51 664.454   5
  -3  -4   8 9234.55 629.265   4
  -3  -4   7 2829.02 336.623   2
   3   4  -7 2480.18 290.538   2
  -3  -4   7 2094.59 282.539   5
   3   4  -7 2432.28 218.742   1
  -3  -4   7 2473.39 318.875   4
   3   4  -6 13045.7 628.656   2
  -3  -4   6 12478.1 682.849   2
   3   4  -6 10811.6 398.345   1
  -3  -4   6 12114.5 629.905   5
  -3  -4   6 11886.1 669.266   4
  -3  -4   5 49634.8 1367.22   2
   3   4  -5 50288.4 1276.20   2
  -3  -4   5 49126.4 1077.08   5
  -3  -4   5 49141.3 1324.17   4
   3   4  -5 52180.1 723.518   1
  -3  -4   4 215.023 112.937   4
   3   4  -4 288.247 133.285   2
  -3  -4   4 203.883 73.6642   5
  -3  -4   4 145.622 93.3541   2
   3   4  -3 9251.96 579.906   2
  -3  -4   3 8675.31 523.588   4
  -3  -4   3 8885.05 593.664   2
  -3  -4   2 39.5096 96.7655   2
  -3  -4   2 122.022 60.6080   3
   3   4  -2 8.16756 100.981   2
  -3  -4   2 99.5385 73.9959   4
  -3  -4   1 1755.32 170.785   3
  -3  -4   1 1559.21 215.708   4
  -3  -4   1 1854.57 288.377   2
   3   4  -1 2023.34 286.020   2
  -3  -4   0 2447.88 247.999   4
  -3  -4   0 2492.21 158.361   1
   3   4   0 3328.56 402.154   2
   3   4   1 5761.42 291.792   3
   3   4   1 6796.06 308.430   5
  -3  -4  -1 5730.35 296.770   1
   3   4   1 6496.40 583.977   2
  -3  -4  -2 255.125 87.8888   1
   3   4   2 71.4301 149.530   2
   3   4   2 203.438 55.9154   3
   3   4   2 210.894 81.6474   5
   3   4   3 41530.4 1551.24   2
  -3  -4  -3 39055.1 1019.08   1
   3   4   3 38077.2 1093.20   5
   3   4   4 18519.9 1069.37   2
  -3  -4  -4 17104.2 742.917   1
   3   4   4 15841.1 795.826   5
  -3  -4  -5 3219.31 352.629   1
   3   4   5 3156.75 398.543   5
   3   4   6 2021.67 321.380   5
   3   4   7 1134.43 277.242   5
  -3  -4  -8 532.159 190.551   1
   3   4   8 555.946 190.684   5
  -3  -4  -9 791.983 244.291   1
   3   4   9 739.128 272.521   5
  -3  -4 -10 384.246 203.482   1
   3   4  10 682.425 251.366   5
   3   4  11-211.923 230.526   5
   3   4  12 2717.17 551.043   5
   3   4  13 98.2198 207.513   5
   3   4  14-135.891 236.397   5
   3   4  15 86.1311 241.217   5
   3   4  16 410.356 315.999   5
   3   4  17 270.536 325.159   5
   3   4  18 228.747 234.340   5
   3   4  19 293.802 341.625   5
  -3  -5  23-128.084 348.754   5
  -3  -5  22 1.72688 272.360   5
  -3  -5  21-262.600 342.824   5
  -3  -5  20 1848.31 541.246   5
  -3  -5  19-46.9998 403.082   5
  -3  -5  18 361.708 242.095   5
  -3  -5  17-507.243 346.953   5
  -3  -5  16-172.498 310.309   5
   3   5 -15 21530.2 1065.90   1
  -3  -5  15 20713.4 1569.66   5
  -3  -5  14-19.2454 90.2773   4
   3   5 -14-24.1915 74.7704   1
  -3  -5  14-20.3275 113.803   1
  -3  -5  14 276.940 158.244   2
  -3  -5  13 905.061 246.163   2
  -3  -5  13 1003.31 259.976   4
   3   5 -13 412.168 181.257   1
  -3  -5  13 715.159 231.193   1
  -3  -5  12 1003.69 249.240   4
   3   5 -12 1235.10 232.019   1
   3   5 -12 1211.13 269.178   2
  -3  -5  12 572.954 218.330   1
  -3  -5  12 1003.73 246.394   2
  -3  -5  11 117.116 113.367   4
   3   5 -11-18.1027 69.4505   1
   3   5 -11 108.851 151.916   2
  -3  -5  11-22.4479 91.5813   2
  -3  -5  11-54.7063 100.697   1
  -3  -5  10 256.522 145.179   4
   3   5 -10 206.221 97.2018   1
   3   5 -10 286.836 148.066   2
  -3  -5  10 223.229 115.587   1
  -3  -5  10 286.886 135.882   2
  -3  -5   9 750.481 199.312   4
   3   5  -9 719.469 149.552   1
  -3  -5   9 484.777 163.164   1
   3   5  -9 616.425 162.474   2
  -3  -5   8 9920.44 511.553   1
   3   5  -8 10990.7 616.762   2
  -3  -5   8 10703.7 691.483   4
   3   5  -8 10594.0 498.280   1
  -3  -5   7 2641.35 244.080   1
   3   5  -7 3358.20 346.751   2
  -3  -5   7 3432.75 375.929   4
   3   5  -7 3560.36 254.890   1
  -3  -5   6 3601.63 221.935   1
   3   5  -6 3441.16 200.830   1
   3   5  -6 3660.49 353.749   2
  -3  -5   6 3212.43 381.265   2
  -3  -5   6 3237.78 366.359   4
  -3  -5   5 335.237 131.349   4
   3   5  -5 158.724 38.7479   1
   3   5  -5 48.8304 130.811   2
  -3  -5   5 175.596 106.391   2
   3   5  -4 12720.1 692.870   2
  -3  -5   4 12349.5 723.726   2
  -3  -5   4 11769.6 397.669   5
  -3  -5   4 12053.0 633.407   4
   3   5  -3 11296.6 675.459   2
  -3  -5   3 9716.93 671.784   2
  -3  -5   3 10322.3 573.716   4
  -3  -5   2 4211.48 250.790   3
   3   5  -2 3571.01 402.577   2
  -3  -5   2 3912.87 344.928   4
  -3  -5   1 2527.67 141.639   1
   3   5  -1 2769.26 345.505   2
  -3  -5   1 2571.49 263.808   4
  -3  -5   0 64264.1 941.201   1
  -3  -5   0 60767.6 1196.31   4
   3   5   1 6335.07 303.822   5
   3   5   1 5846.26 572.125   2
  -3  -5  -1 5464.05 347.613   1
   3   5   2 4917.11 254.437   3
  -3  -5  -2 4829.57 344.444   1
   3   5   2 4763.23 324.798   5
   3   5   2 4520.04 506.248   2
   3   5   3 16873.9 493.042   3
  -3  -5  -3 16194.3 730.671   1
   3   5   3 16906.1 741.585   5
   3   5   3 16929.6 1036.80   2
   3   5   4 3169.95 359.023   5
  -3  -5  -4 3069.77 343.112   1
   3   5   4 3195.71 480.244   2
   3   5   5 12336.1 939.300   2
   3   5   5 13105.5 805.071   5
  -3  -5  -5 10493.7 752.932   1
   3   5   6 4665.62 601.165   2
   3   5   6 5470.51 576.090   5
  -3  -5  -7 5282.11 558.357   1
   3   5   7 5984.04 621.857   5
   3   5   8 1517.38 359.664   5
  -3  -5  -8 1522.56 299.323   1
  -3  -5  -9 5671.02 608.163   1
   3   5   9 6553.65 757.831   5
   3   5  10 2985.14 526.074   5
   3   5  11 2077.84 474.086   5
   3   5  12 213.446 213.417   5
   3   5  13 175.534 275.750   5
   3   5  14 105.982 176.535   5
   3   5  15 335.345 289.782   5
   3   5  16 499.137 334.489   5
   3   5  17 332.630 352.325   5
   3   5  18 296.199 362.910   5
  -3  -6  24 276.883 287.944   5
  -3  -6  23 287.248 337.050   5
  -3  -6  22-60.0600 253.115   5
  -3  -6  21 2391.49 660.295   5
  -3  -6  20-191.914 372.494   5
  -3  -6  19 4102.86 806.268   5
  -3  -6  18-394.628 378.949   5
  -3  -6  17 9107.77 831.868   1
  -3  -6  16 3280.04 516.599   1
   3   6 -16 1984.56 473.246   1
   3   6 -15 1018.48 254.077   1
  -3  -6  15 909.374 274.649   1
  -3  -6  14 4748.53 535.918   2
   3   6 -14 5183.26 532.388   1
  -3  -6  13 673.636 199.252   4
  -3  -6  13 871.771 243.005   2
   3   6 -13 1011.15 267.204   2
   3   6 -13 693.468 221.133   1
  -3  -6  13 933.607 260.886   1
   3   6 -12 5041.07 473.900   2
  -3  -6  12 5094.73 482.441   1
  -3  -6  12 4444.02 487.512   2
   3   6 -12 3591.46 411.733   1
  -3  -6  12 5457.36 555.059   4
   3   6 -11 2904.04 351.906   2
  -3  -6  11 2756.84 359.755   1
   3   6 -11 4159.52 393.860   1
  -3  -6  11 3033.91 400.792   2
  -3  -6  11 3105.80 415.157   4
  -3  -6  10 8077.73 541.551   1
   3   6 -10 8525.75 581.892   2
   3   6 -10 8328.89 510.732   1
  -3  -6  10 8936.07 658.116   2
  -3  -6  10 7760.02 622.909   4
   3   6  -9 3512.00 338.828   1
  -3  -6   9 4340.08 370.466   1
   3   6  -9 4018.08 402.314   2
  -3  -6   9 3654.22 433.700   2
  -3  -6   9 3575.66 414.530   4
  -3  -6   8 5625.26 500.862   4
   3   6  -8 6723.51 378.375   1
  -3  -6   8 5582.45 382.855   1
   3   6  -8 5422.40 463.159   2
  -3  -6   7 11645.0 689.117   4
   3   6  -7 11164.8 654.175   2
  -3  -6   6 3687.93 226.876   1
   3   6  -6 3147.87 360.680   2
  -3  -6   6 2868.58 348.474   4
  -3  -6   5 17353.6 396.867   1
   3   6  -5 15559.2 803.778   2
  -3  -6   5 16515.4 771.704   4
  -3  -6   4 15483.8 325.016   5
   3   6  -4 15586.3 819.933   2
  -3  -6   4 15146.8 735.054   4
   3   6  -3 33911.3 1232.12   2
  -3  -6   3 34188.6 1054.01   4
  -3  -6   2 26736.4 578.240   3
  -3  -6   2 25881.0 436.468   1
   3   6  -2 28103.2 1136.76   2
  -3  -6   2 27156.5 897.763   4
  -3  -6   1 185.113 86.5487   4
  -3  -6   1 217.181 61.7663   1
[truncated: 424,190 more chars]
