# Supplementary material for: Synthesis and Structural Characterization of Isostructural 4-(4-Aryl)-2-(5-(4-fluorophenyl)-3-(1-(4-fluorophenyl)-5-methyl-1H-1,2,3-triazol-4-yl)-4,5-dihydro-1H-pyrazol-1-yl)thiazoles
Source: MDPI journal article supplement (doi:10.3390/cryst11070795), 2021-07-08
Supplement: s1 [file s1 › IR Spectrum of 4.pdf]

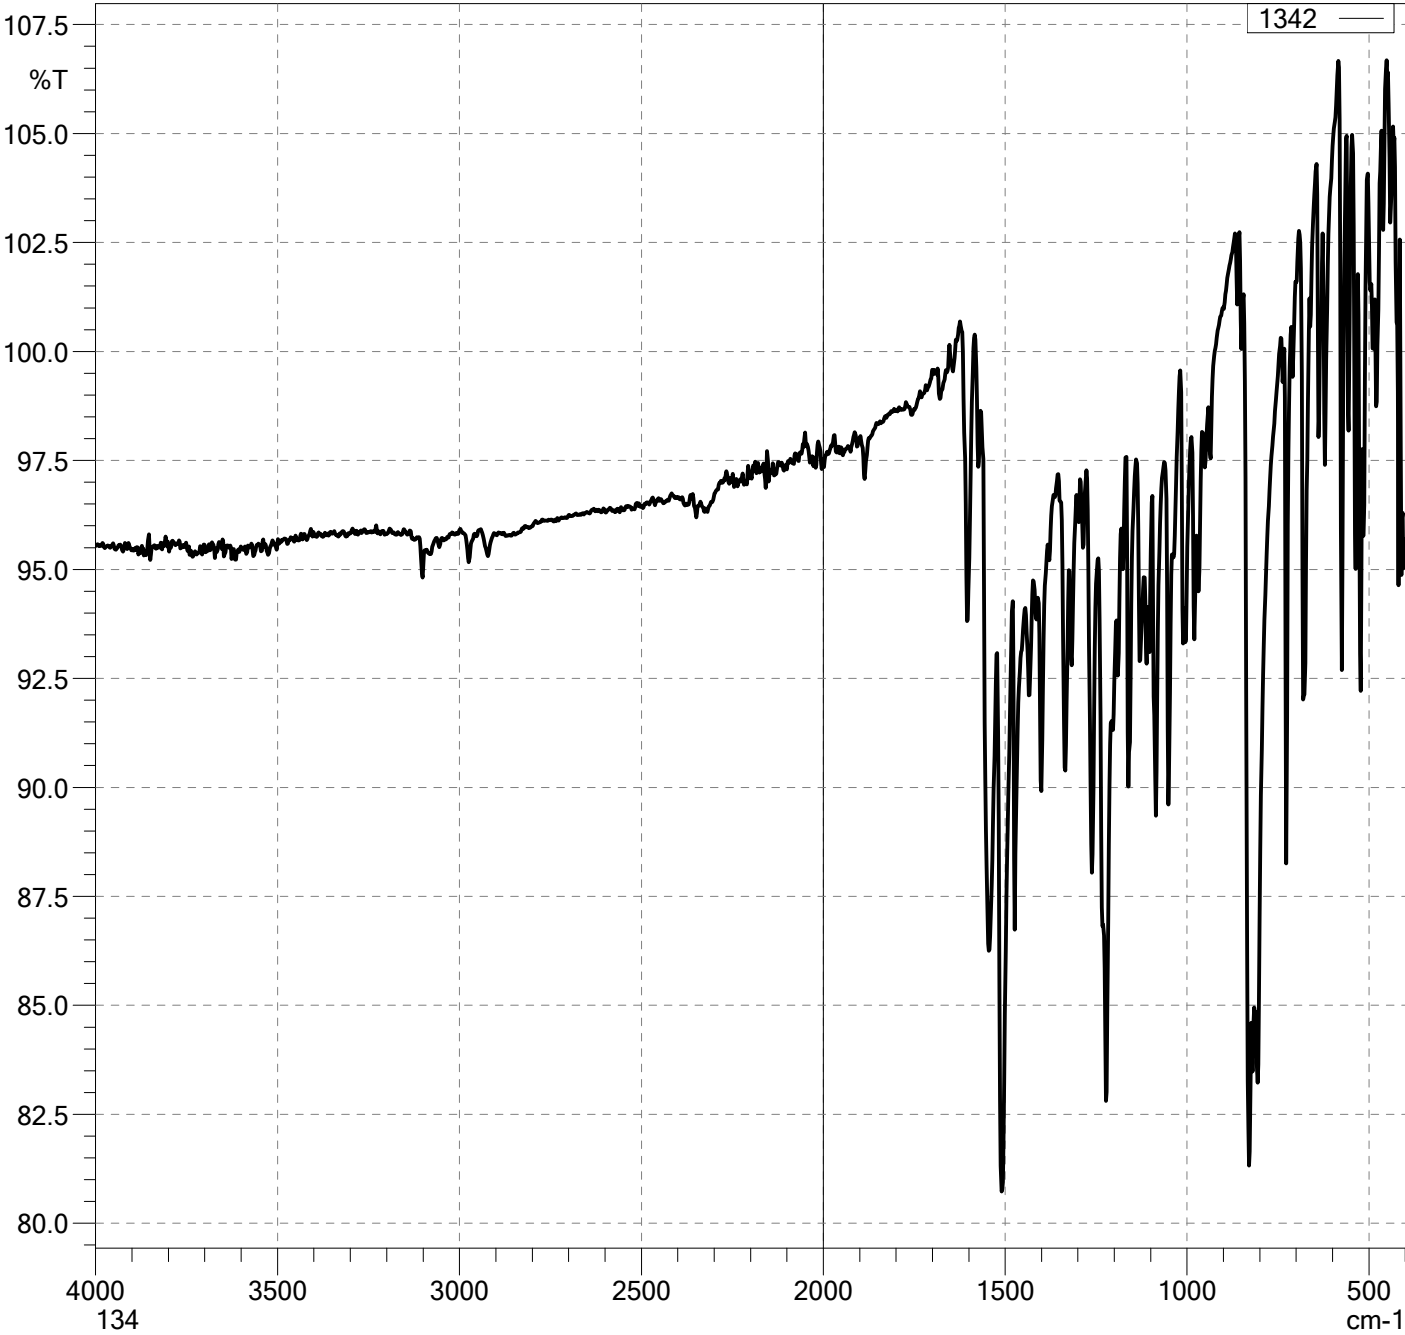

C:\Users\Shimadzu\Desktop\BK\1342.ispd

134

|   | Item           | Value          |
|---|----------------|----------------|
| 2 | Sample name    | 134            |
| 3 | Sample ID      | 2              |
| 4 | Option         |                |
| 5 | Intensity Mode | %Transmittance |
| 6 | Apodization    | Happ-Genzel    |
| 9 | No. of Scans   | 45             |

|    |            |                    |
|----|------------|--------------------|
| 10 | Resolution | 4 cm <sup>-1</sup> |
|----|------------|--------------------|
