# Supplementary figures and images for: Synthesis and Structural Characterization of Isostructural 4-(4-Aryl)-2-(5-(4-fluorophenyl)-3-(1-(4-fluorophenyl)-5-methyl-1H-1,2,3-triazol-4-yl)-4,5-dihydro-1H-pyrazol-1-yl)thiazoles
Source: MDPI journal article supplement (doi:10.3390/cryst11070795), 2021-07-08

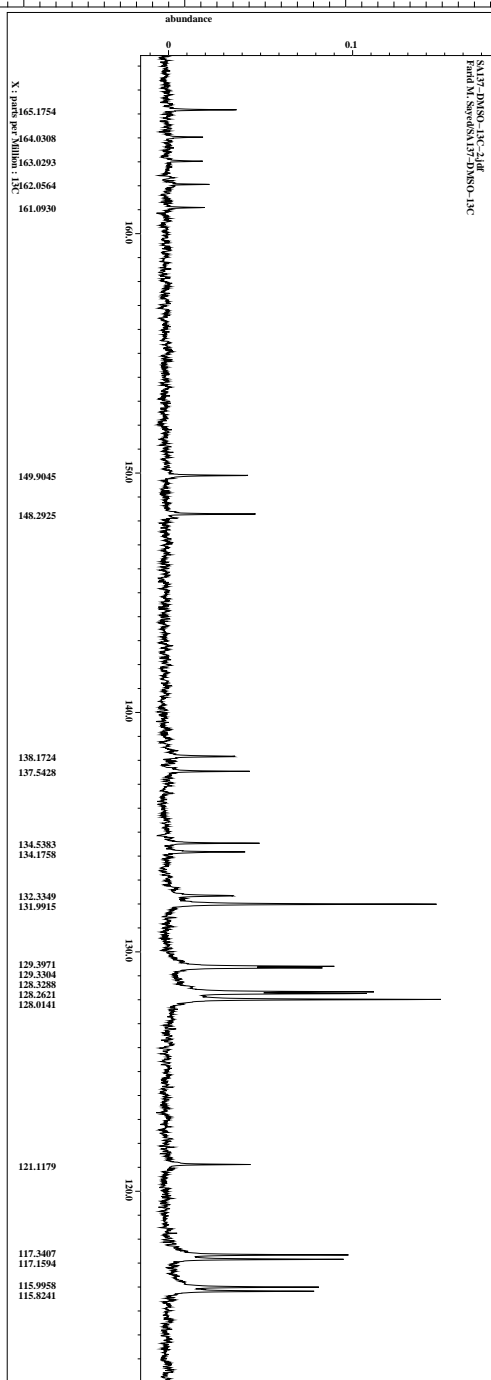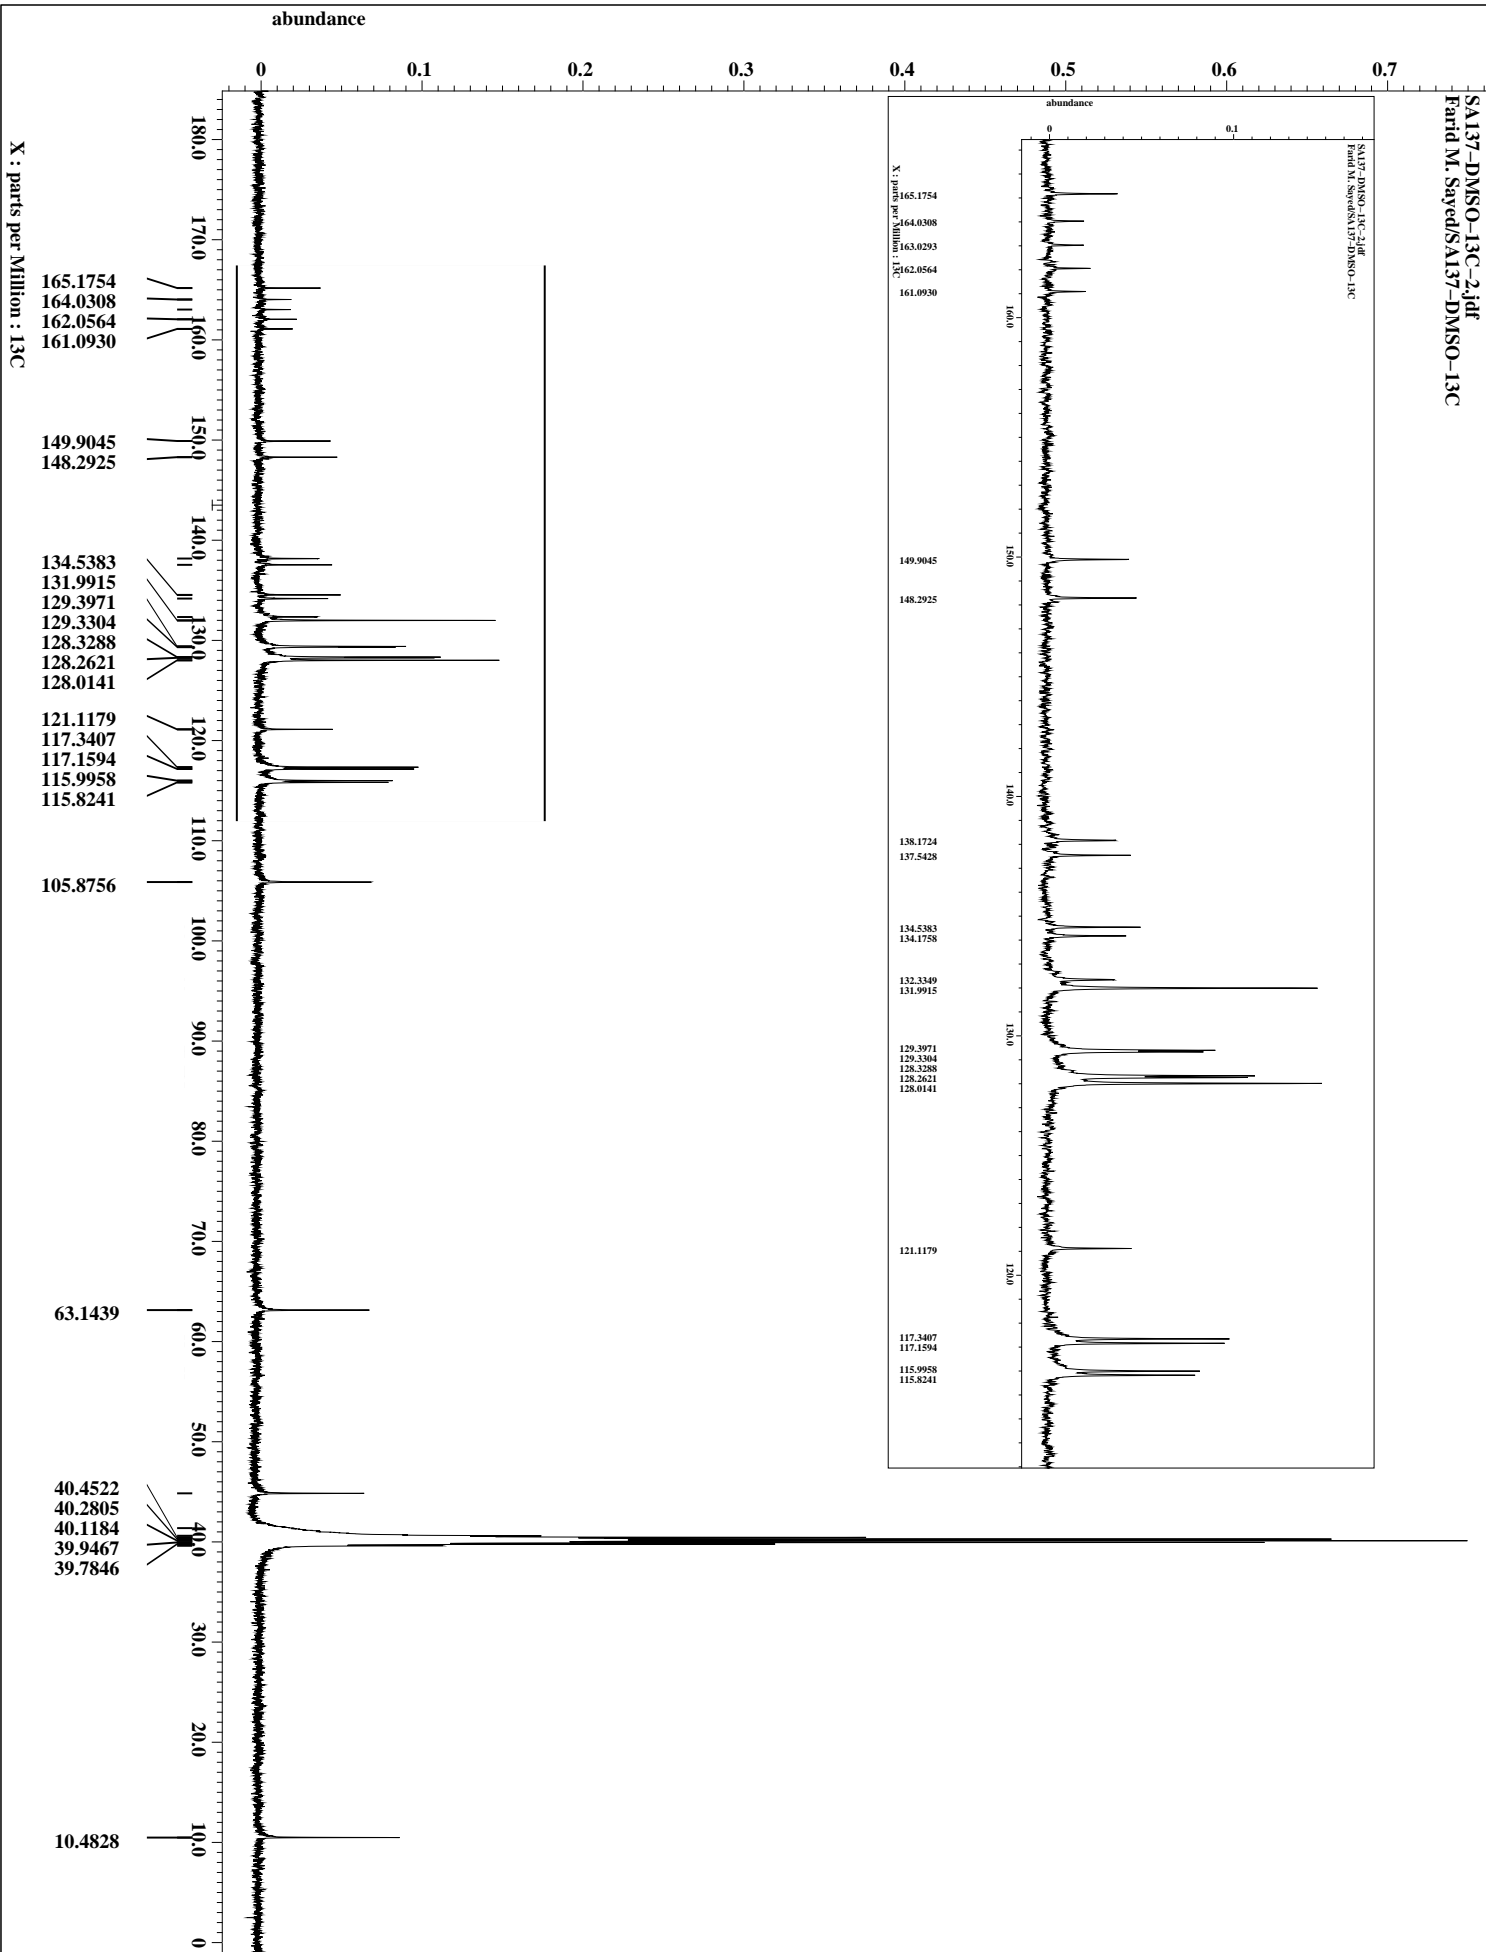

Supplement: s1 [file s1]

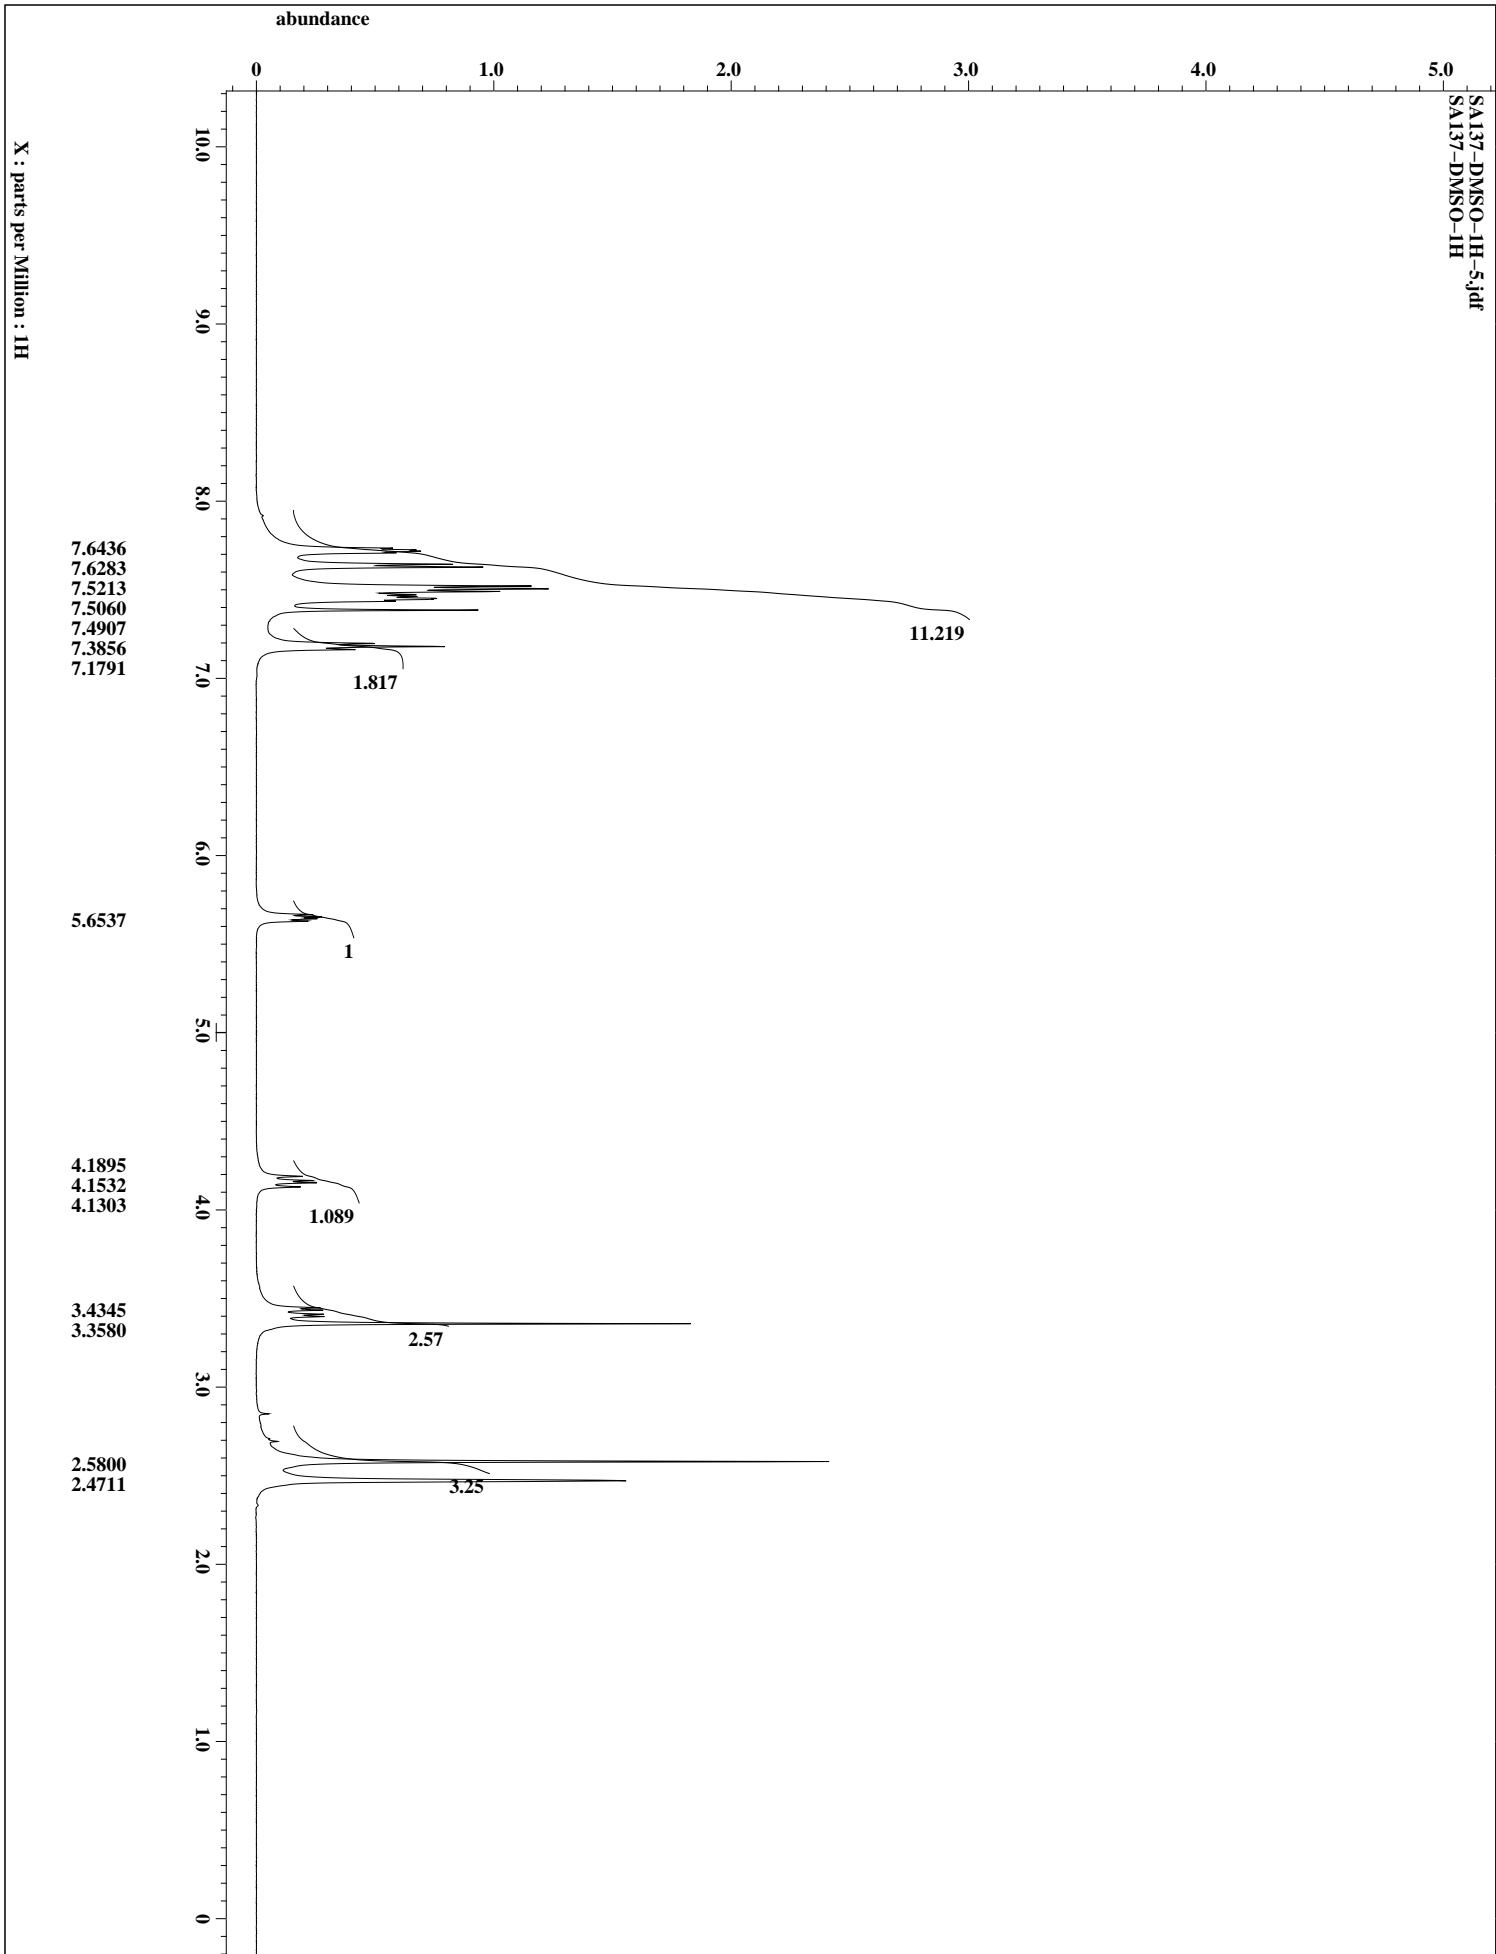

Supplement: s1 [file s1 › 1H NMR Spectrum of 5.pdf]

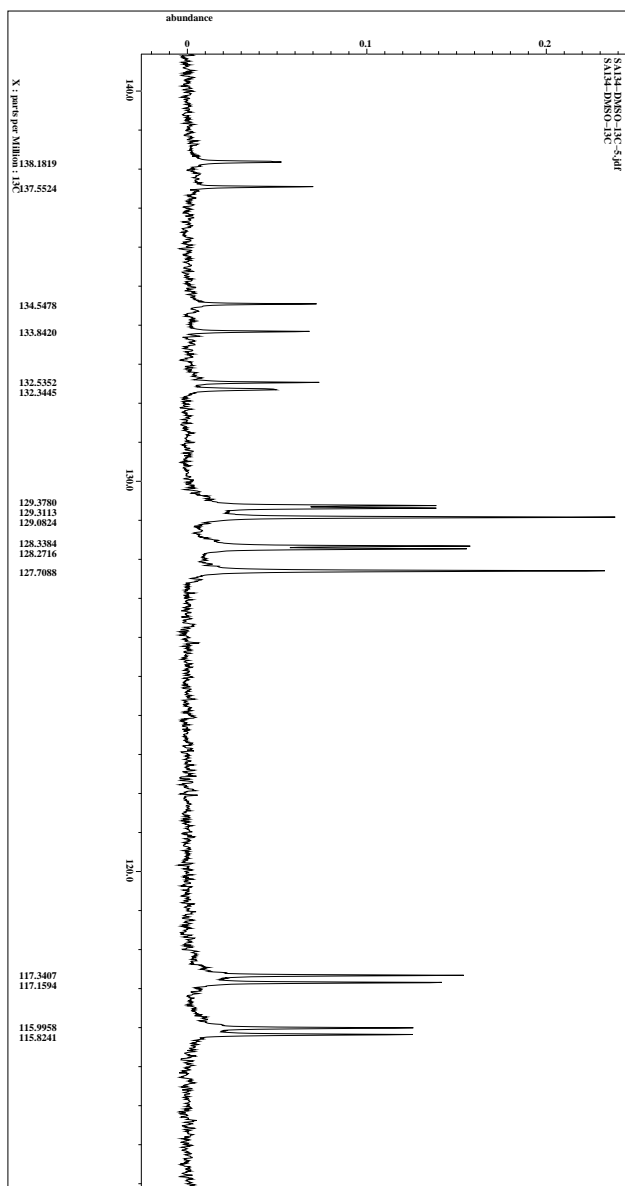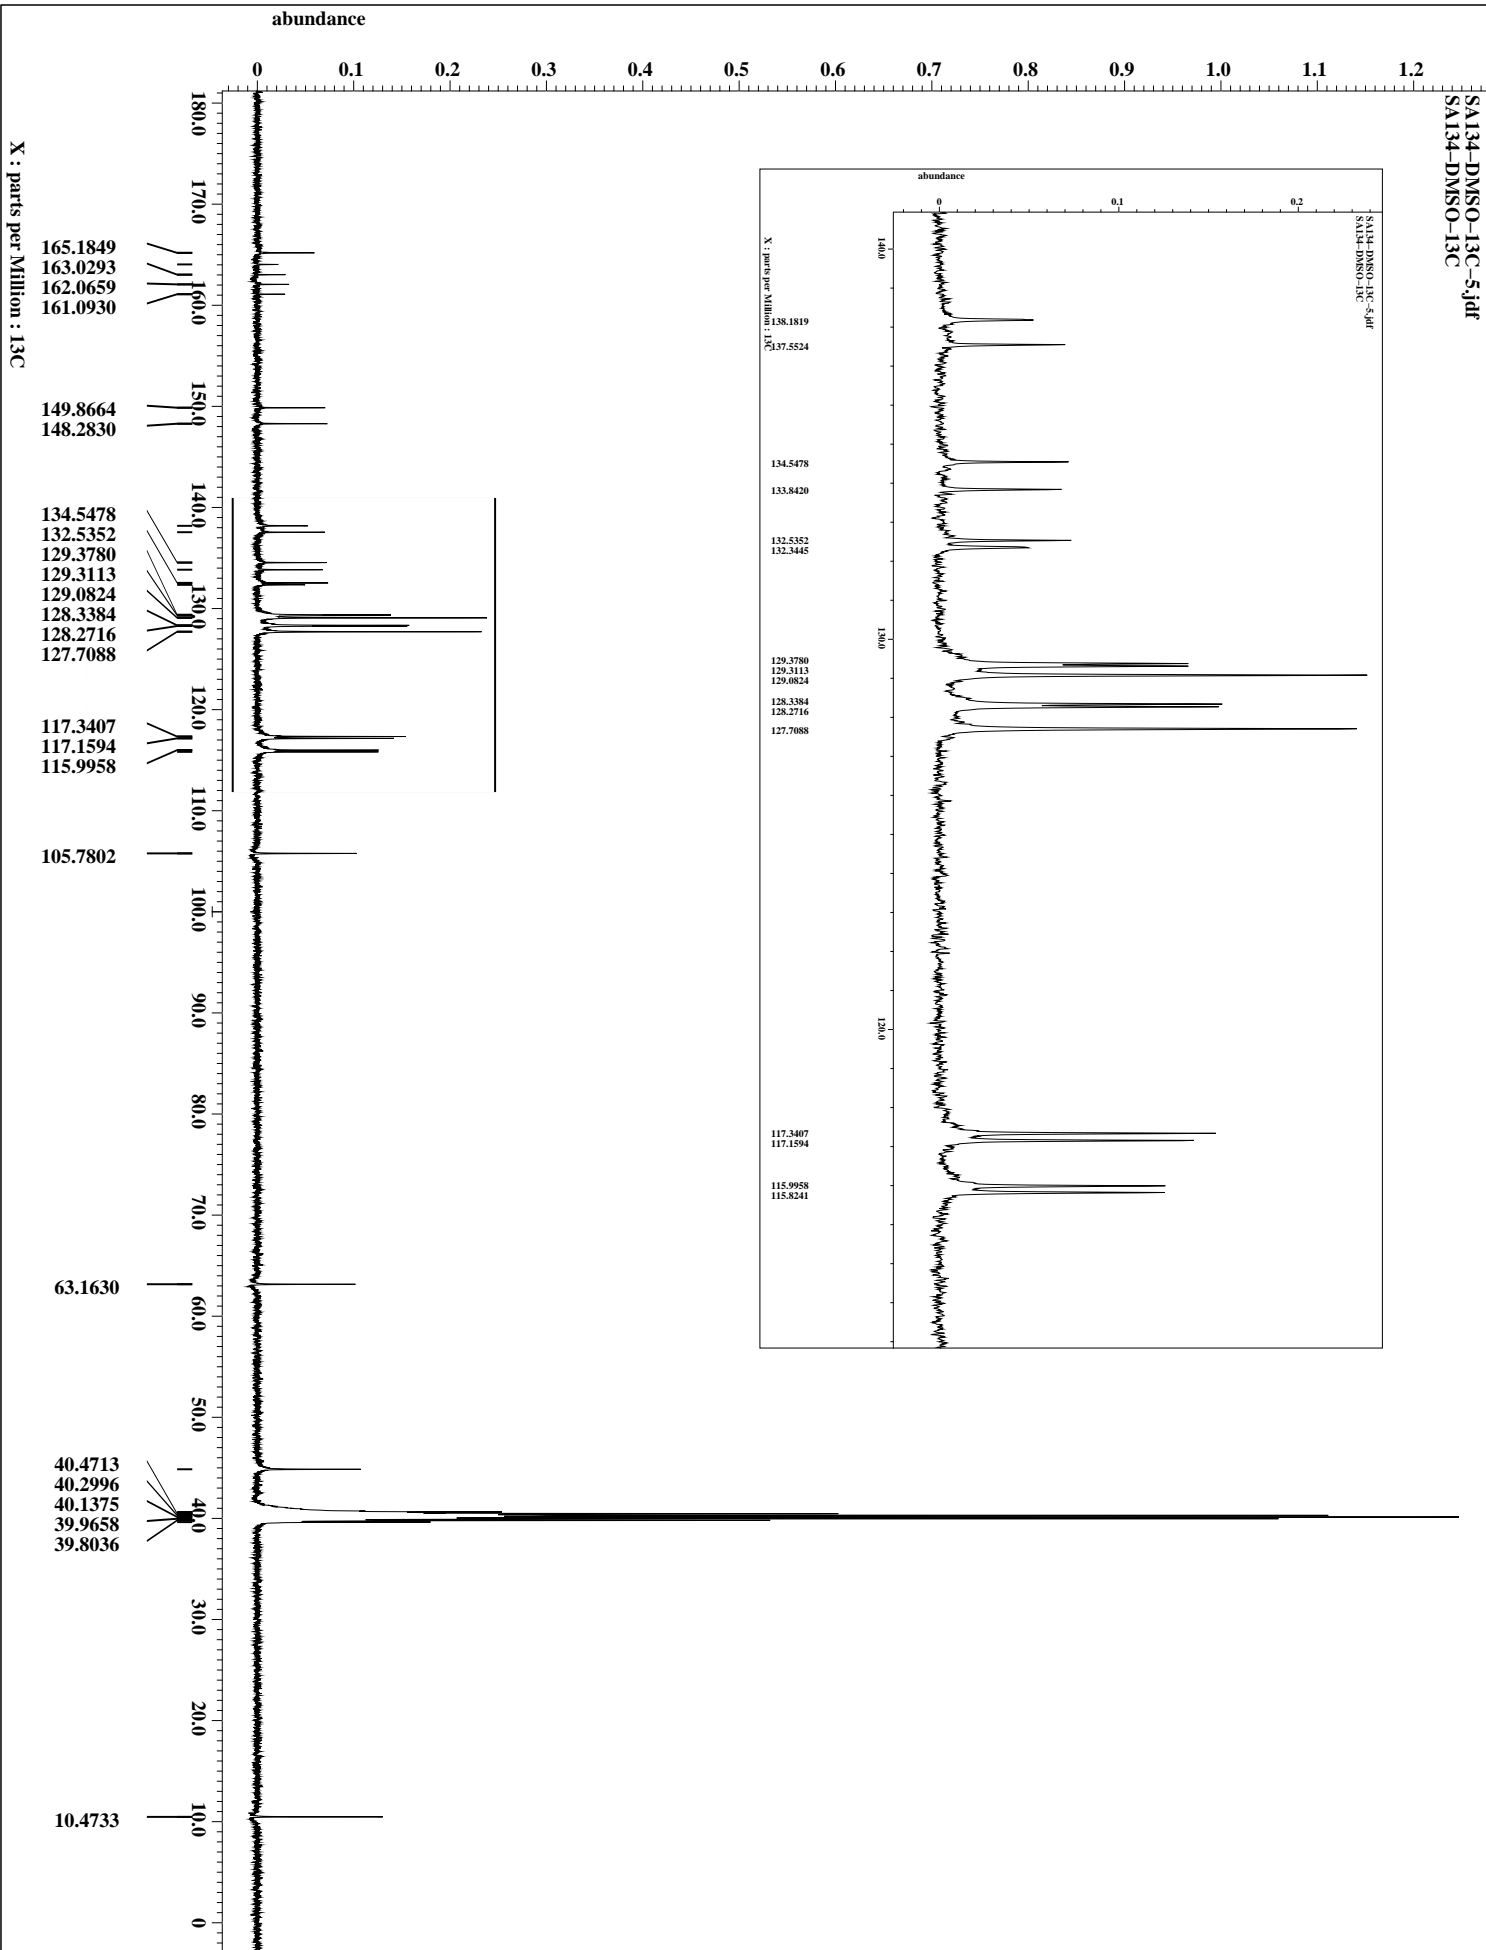

Supplement: s1 [file s1 › 13C NMR Spectrum of 4.pdf]

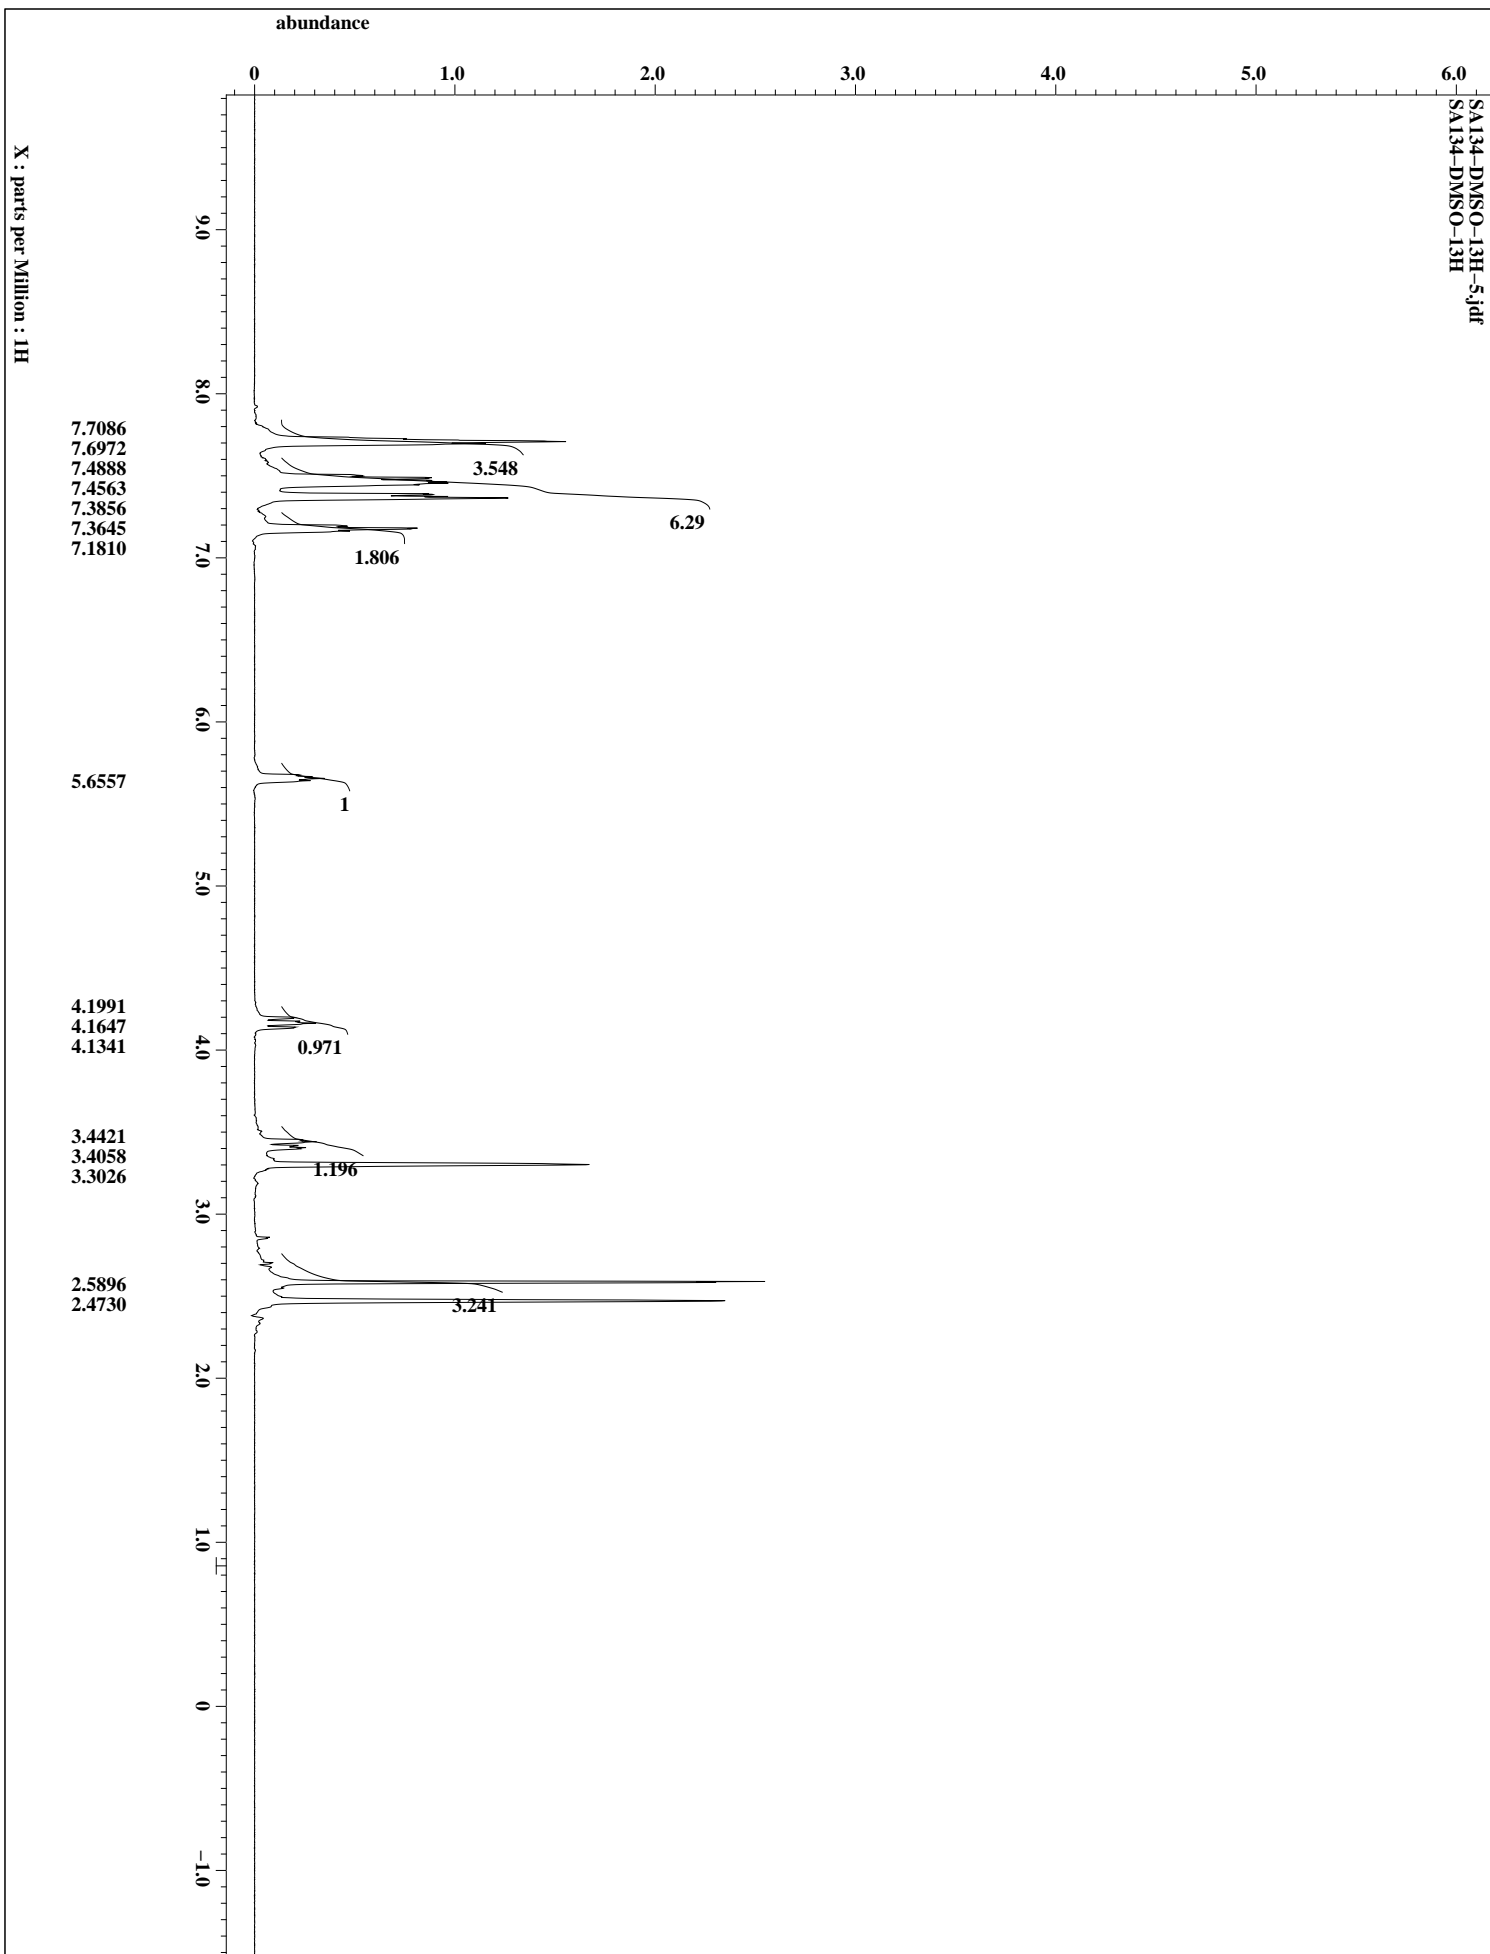

Supplement: s1 [file s1 › 1H NMR Spectrum of 4.pdf]
